# Supplementary material for: Internalization Characterization of Si Nanorod with Camouflaged Cell Membrane Proteins Reveals ATXN2 as a Negative Regulator
Source: MDPI journal article supplement (doi:10.3390/cells8080931), 2019-08-19
Supplement: s1 [file s1]

# Internalization Characterization of Si Nanorod with Camouflaged Cell Membrane Proteins Reveals *ATXN2* as a Negative Regulator

Yi Lu <sup>1,2,†</sup>, Jing Dai <sup>2,3,4,†</sup>, Na Kong <sup>2</sup>, Jianghuai Liu <sup>1</sup>, Jinkang Gong <sup>2</sup> and Yuan Yao <sup>2,\*</sup>

<sup>1</sup> State Key Laboratory of Pharmaceutical Biotechnology and Ministry of Education Key Laboratory of Model Animals for Disease Study, Model Animal Research Center of Nanjing University, Nanjing 210061, China

<sup>2</sup> School of Physical Science and Technology, ShanghaiTech University, 393 Middle Huaxia Road,, Shanghai 201210, China

<sup>3</sup> Shanghai Institute of Ceramics, Chinese Academy of Sciences, Shanghai 200050, China

<sup>4</sup> University of Chinese Academy of Sciences, Beijing 100049, China

\* Correspondence: yaoyuan@shanghaitech.edu.cn

† These authors contributed equally to this work.

**Keywords:** silicon nanorod; cell membrane proteins; cancer; internalization efficiency; *ATXN2*

---

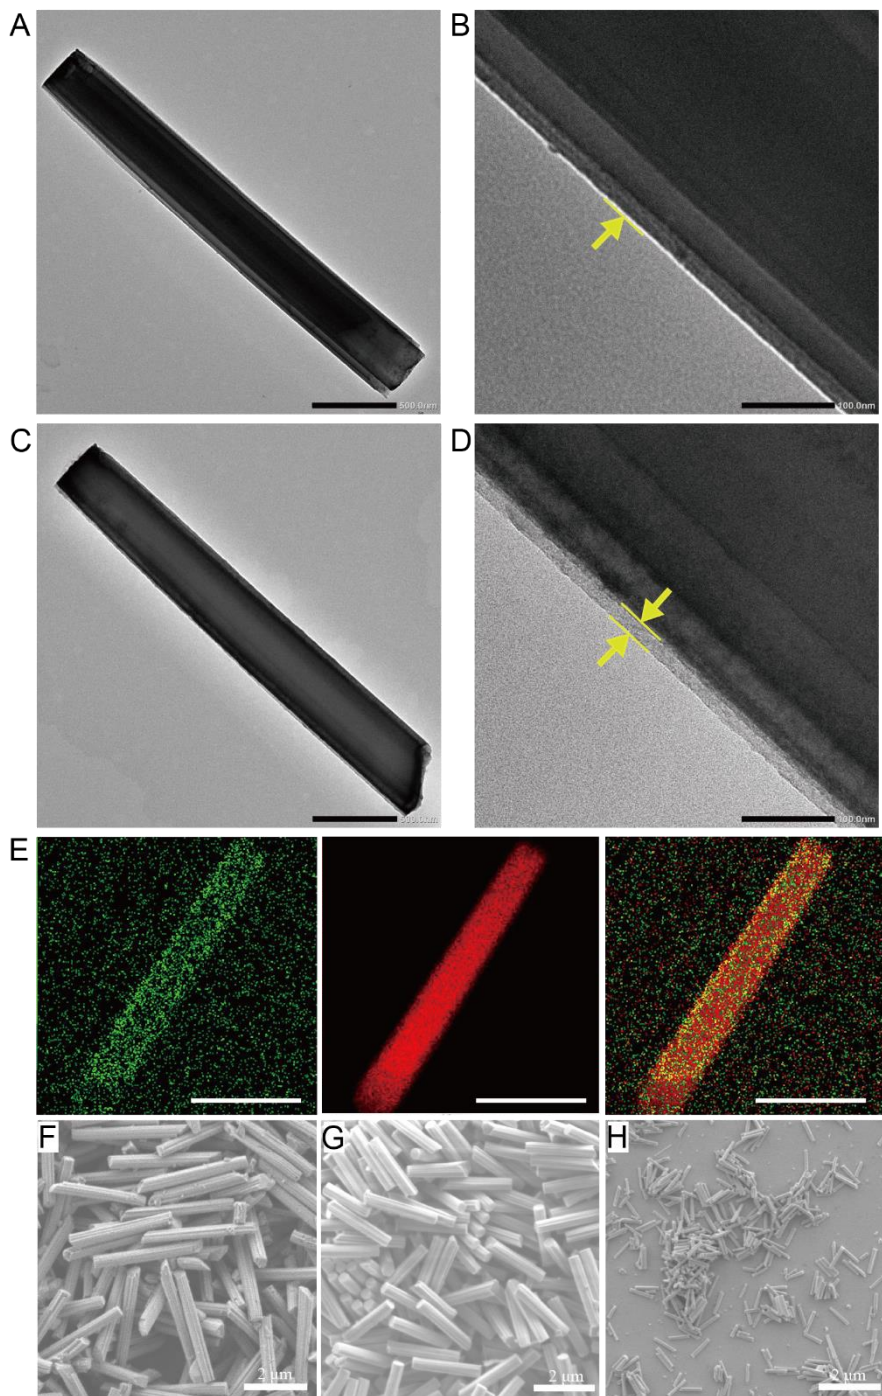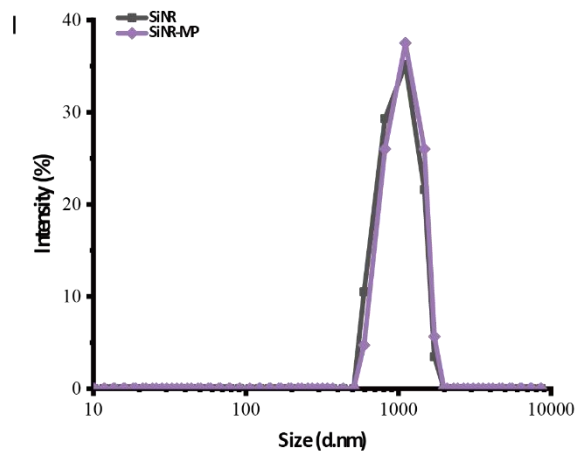

**Figure S1.** (A–D) Transmission electron microscope image of the SiNR without MP coating (A, B) and SiNR with Hela MP coating (C, D). Detailed image of SiNR edge without (B) and with Hela MP coating (D). (E) EDS elemental mapping: Left panel nitrogen mapping, middle panel silicon mapping, right panel merge of nitrogen and silicon mapping. (F–H) SEM pictures of three size SiNR, L-size (F), M-size (G), S-size (H). (I) Dynamic light scatter analysis of the SiNR with (purple) and without (black) MP coating.

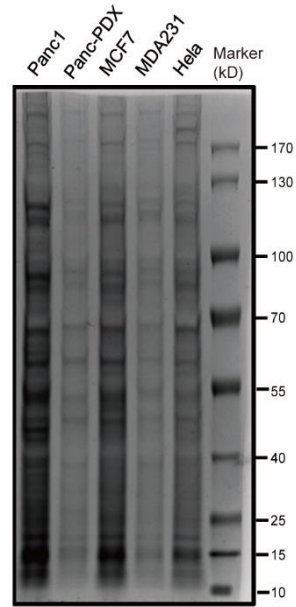

**Figure S2.** Coomassie blue staining of five cell membrane extracts after SDS-PAGE, 20  $\mu$ L protein sample loading.

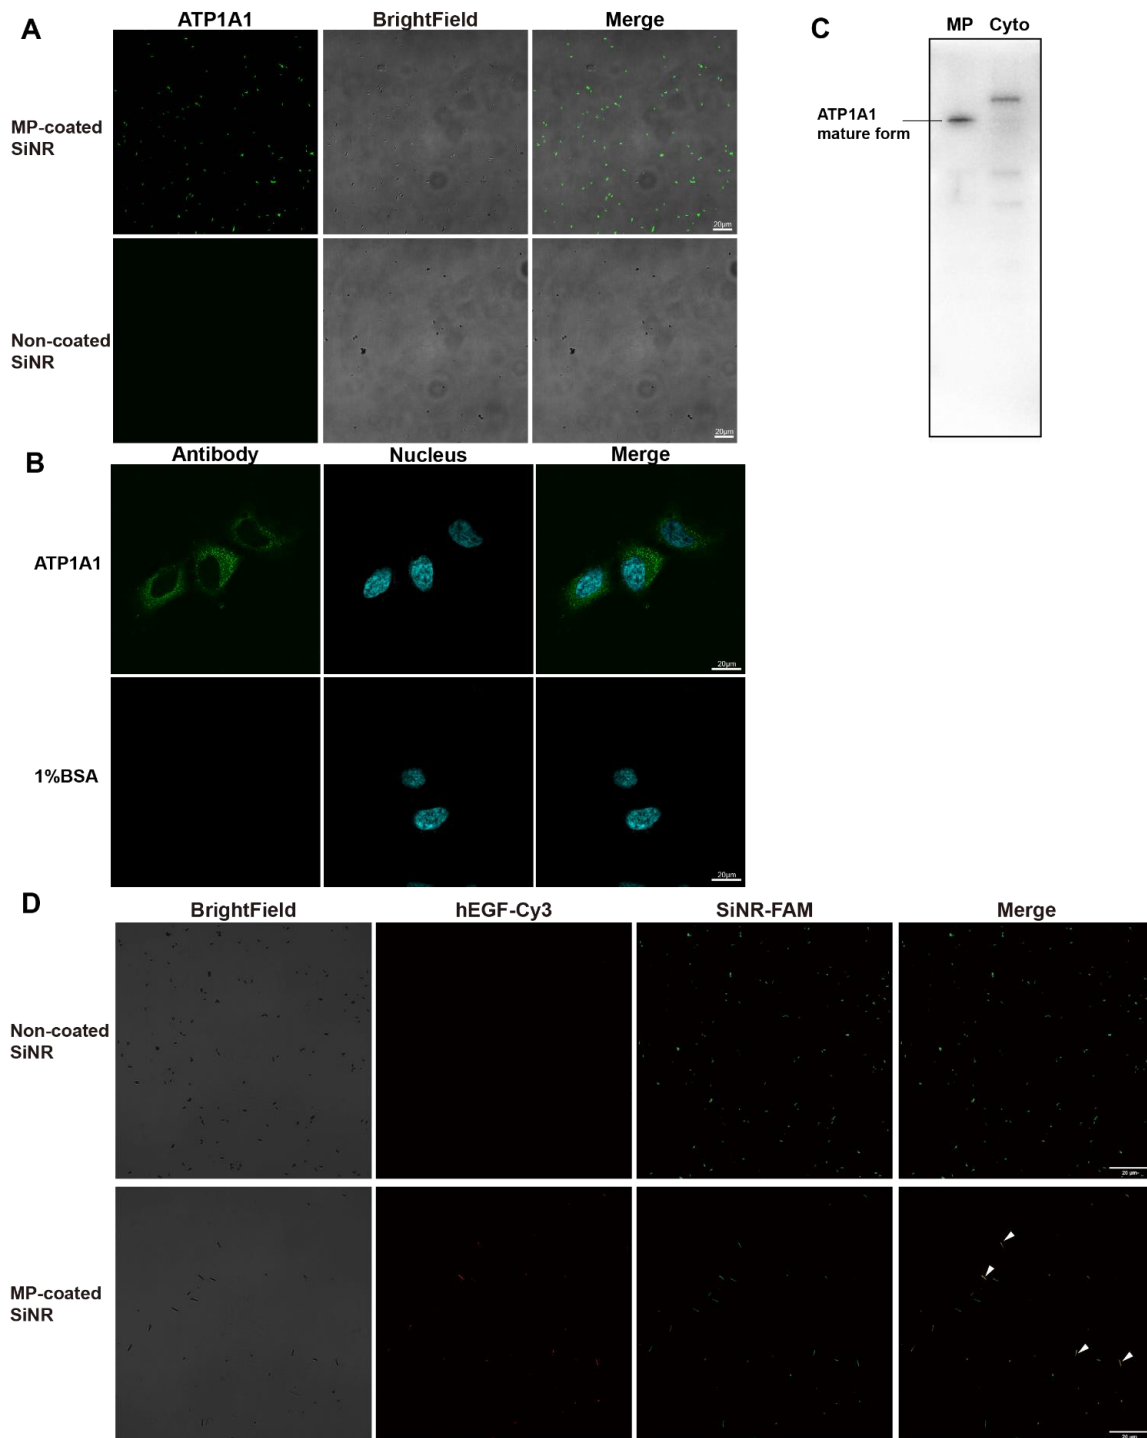

**Figure S3.** Validation of cell membrane proteins on the coated SiNR and biological function. **(A)** Confocal microscopy images of SiNR ATPA1 immunostaining. Green fluorescence signal indicates ATPA1 antibody staining, and BF channel shows SiNR. Upper panel: SiNR-coated MP (Panc-1 cell extracted). Lower panel: SiNR without MP coating as a control group shows no ATPA1 signal. **(B)** 293T cell immunostaining; ATPA1 staining (green); Hoechst shows the nucleus (cyan). Scale bars represent 20  $\mu$ m. **(C)** Western blot shows ATPA1 in a mature form and is mainly in the cell membrane (MP, extracted from Panc-1 cells). **(D)** Cy3 labeled human EGF (red) was incubated with Panc1@SiNR or non-coated SiNR (green) at 37  $^{\circ}$ C for 2 h, the white arrows point colocalization (orange) of the EGF signal and Panc1@SiNR in the merge panel. Scale bars represent 20  $\mu$ m.

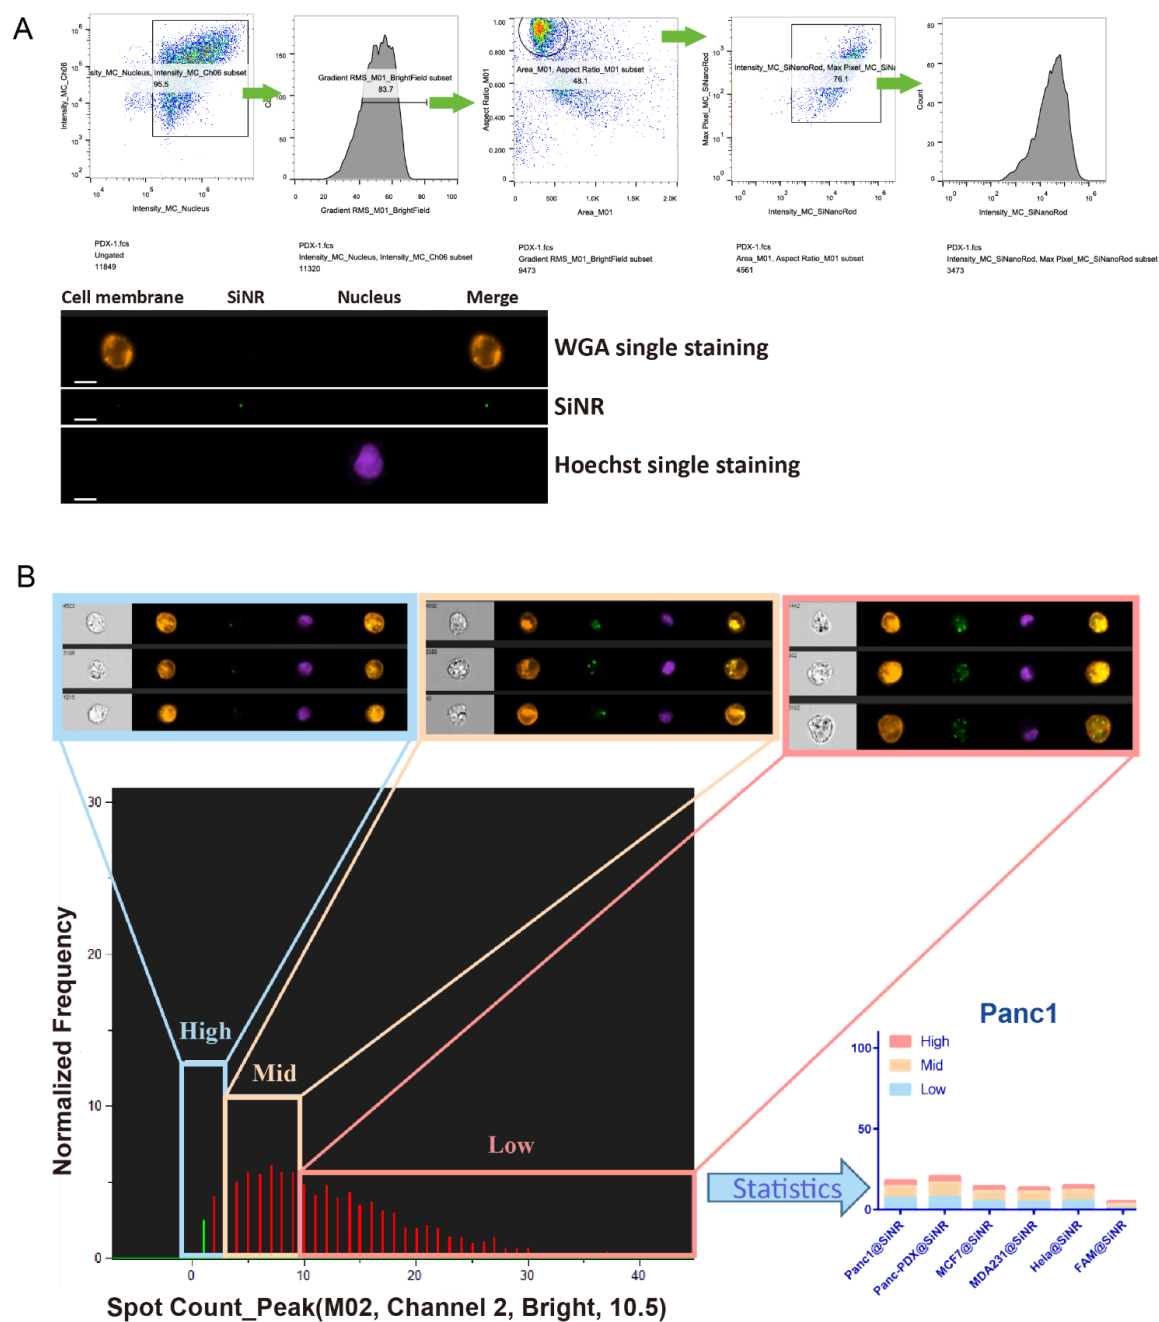

**Figure S4AB.** Imaging stream cytometry analysis. (A) Upper panel shows the gating strategy. First gating is the nuclear staining. Second gating is brightfield focused cells. The third gating is a single cell define via aspect ratio (1 = Round). The fourth gating is a positive signal from SiNanoRods (FAM channel). Lower panel shows selected images from single color samples for compensation. All fluorescence signals are specific to indicated objects: WGA-membrane, FAM-SiNR, and Hoechst-nucleus. The scale bar is 10  $\mu\text{m}$ . (B) Diagram for the cell distribution of SiNR internalization according to the spot count index: low internalization 0–3, middle internalization 3–10, and high internalization >10.

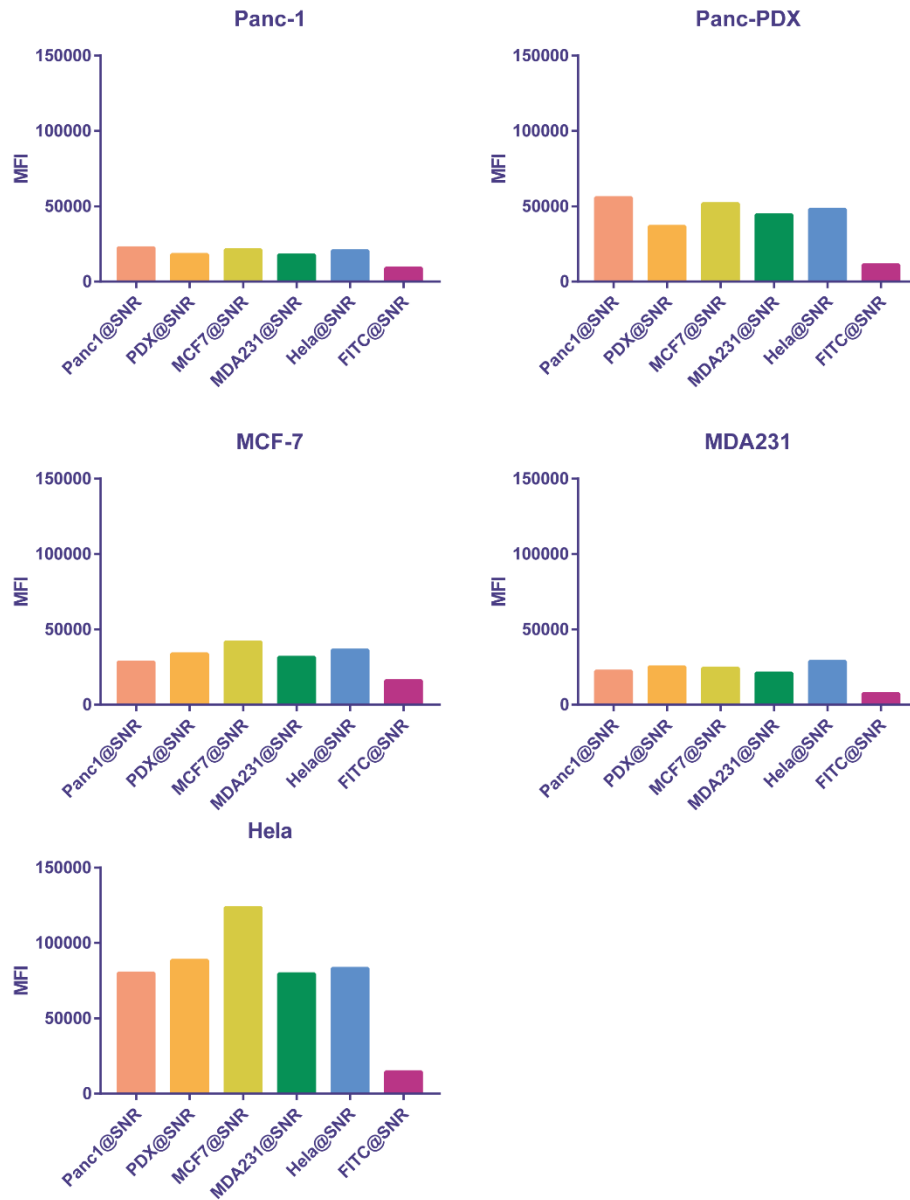

**Figure S4C.** FITC channel MFI of M-size type SiNRs internalized into the cells. The SiNR (FITC channel) mean of fluorescence intensity were calculated using FlowJo VX.

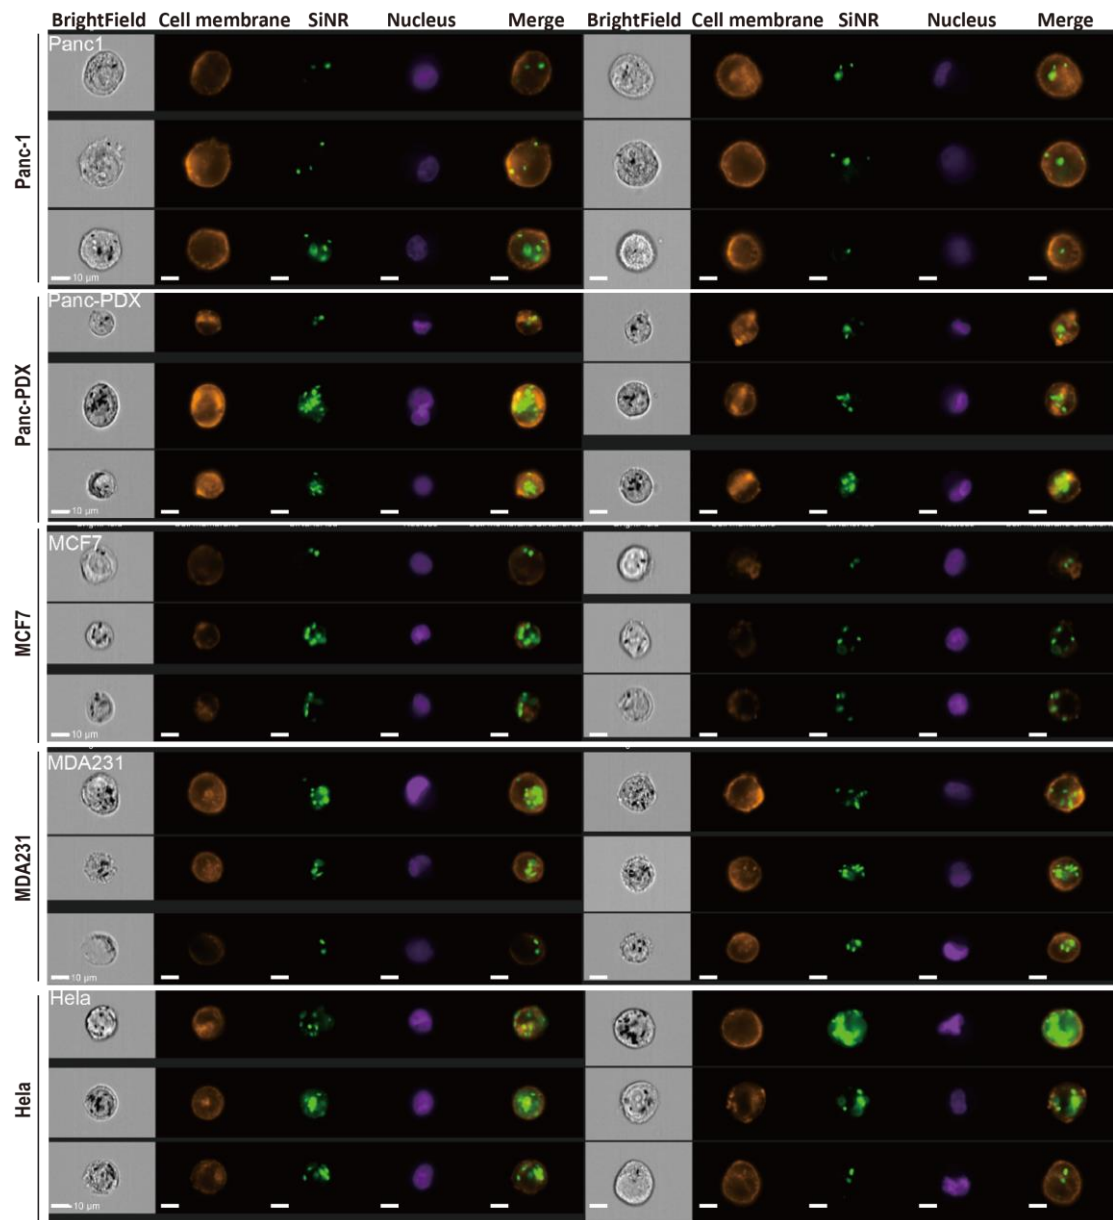

**Figure S4D.** Panc-PDX-PM-coating for M-size SiNR (green, FITC channel) localized within five cell types. Six selected imaging cytometry images were indicated per cell line. Hoechst (purple) indicates the cell nucleus as determined by cytometry. Alexa-594 (orange) conjugated WGA staining shows the cell membrane. Cell membrane/SiNR merged channel indicates the location of SiNR inside the cell. The panels in one group of images are as follows from left to right: bright field, cell membrane, SiNR, nucleus, and merge of cell membrane and SiNR. Scale bar represents 10 μm.



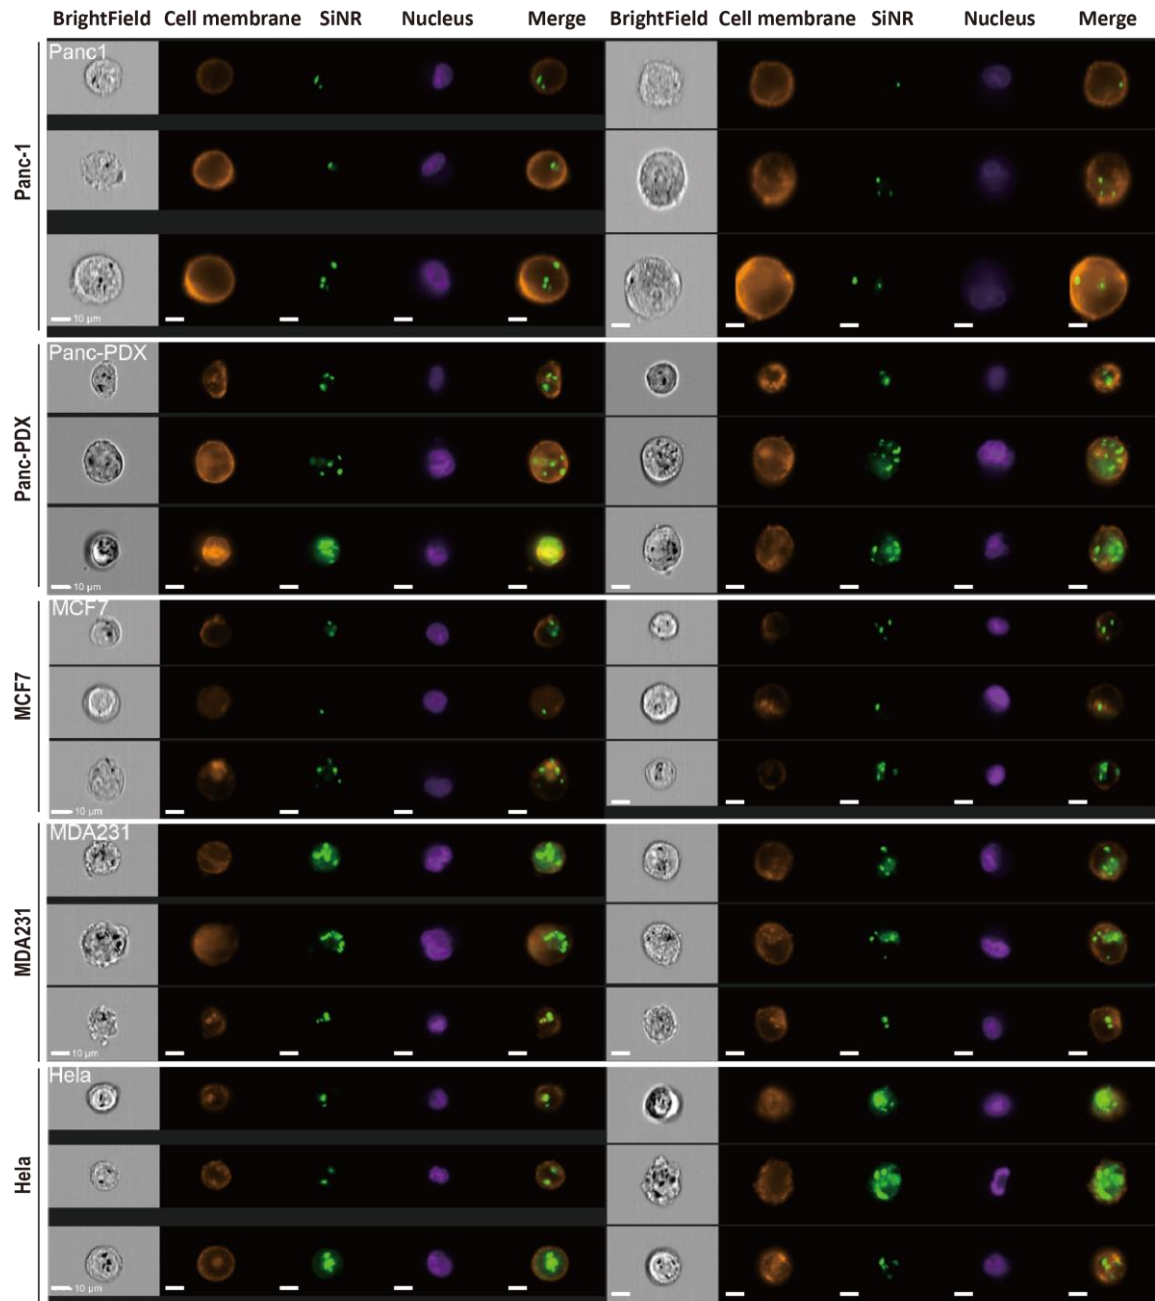

**Figure S4E.** MCF7-PM-coating for M-size SiNR (green, FITC channel) localized within five cell types. Six selected imaging cytometry images were indicated per cell line. Hoechst (purple) indicates the cell nucleus as determined by cytometry. Alexa-594 (orange) conjugated WGA staining shows the cell membrane. Cell membrane/SiNR merged channel indicates the location of SiNR inside the cell. The panels in one group of images are as follows from left to right: bright field, cell membrane, SiNR, nucleus, and merge of cell membrane and SiNR. Scale bar represents 10  $\mu$ m.



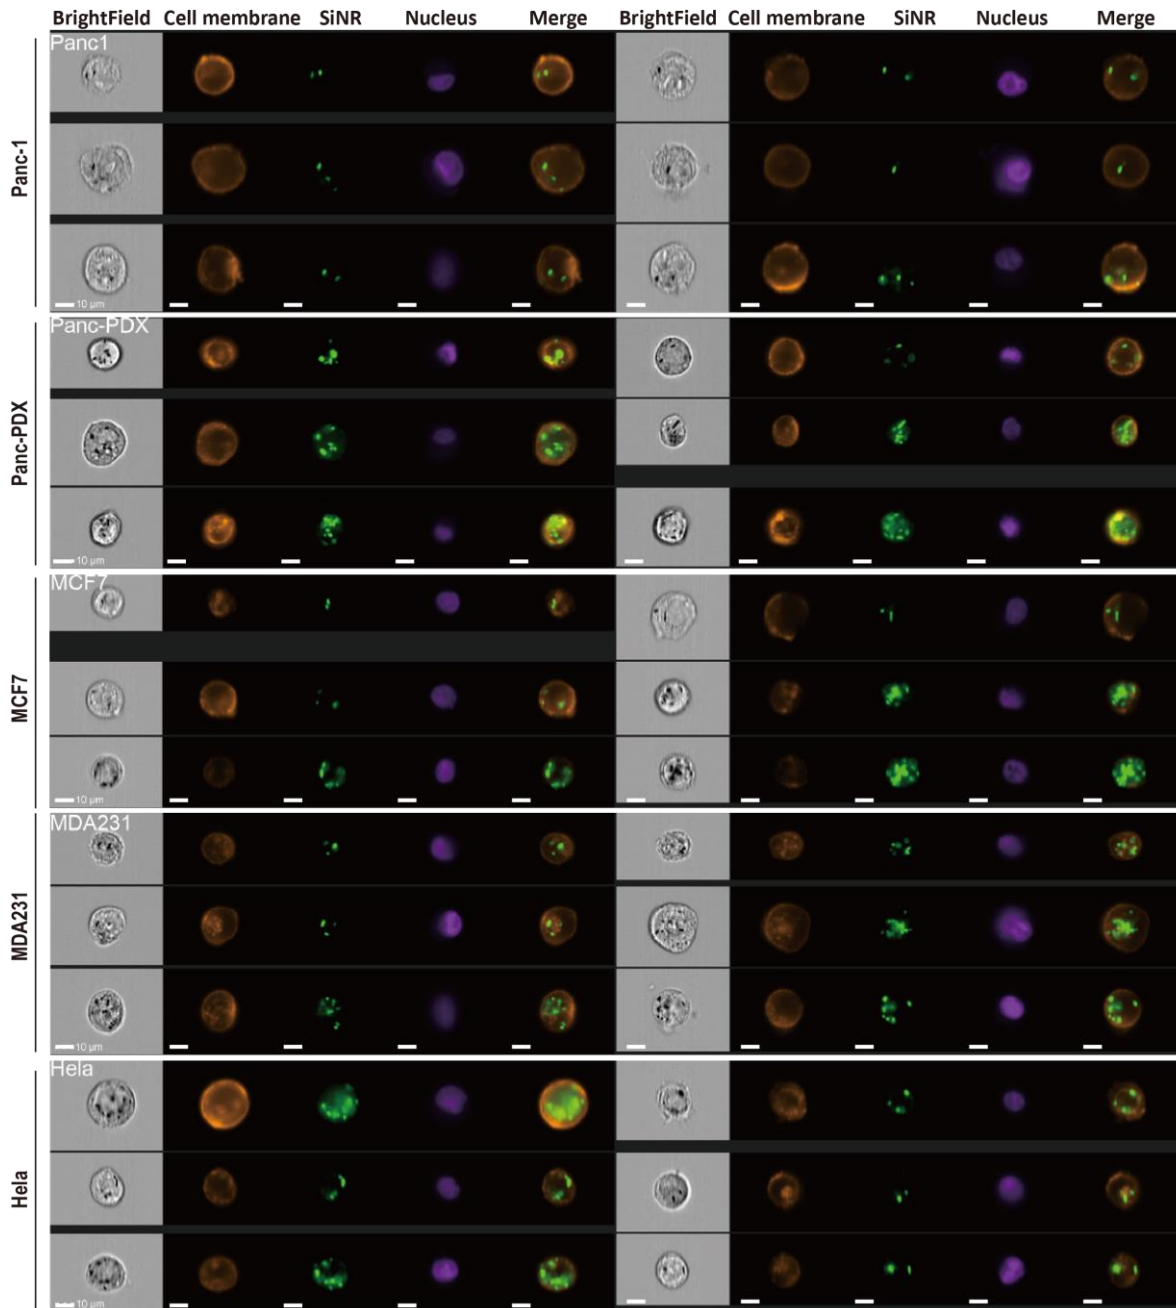

**Figure S4F.** MDA231-PM-coating for M-size SiNR (green, FITC channel) localized within five cell types. Six selected imaging cytometry images were indicated per cell line. Hoechst (purple) indicates the cell nucleus as determined by cytometry. Alexa-594 (orange) conjugated WGA staining shows the cell membrane. Cell membrane/SiNR merged channel indicates the location of SiNR inside the cell. The panels in one group of images are as follows from left to right: bright field, cell membrane, SiNR, nucleus, and merge of cell membrane and SiNR. Scale bar represents 10  $\mu\text{m}$ .

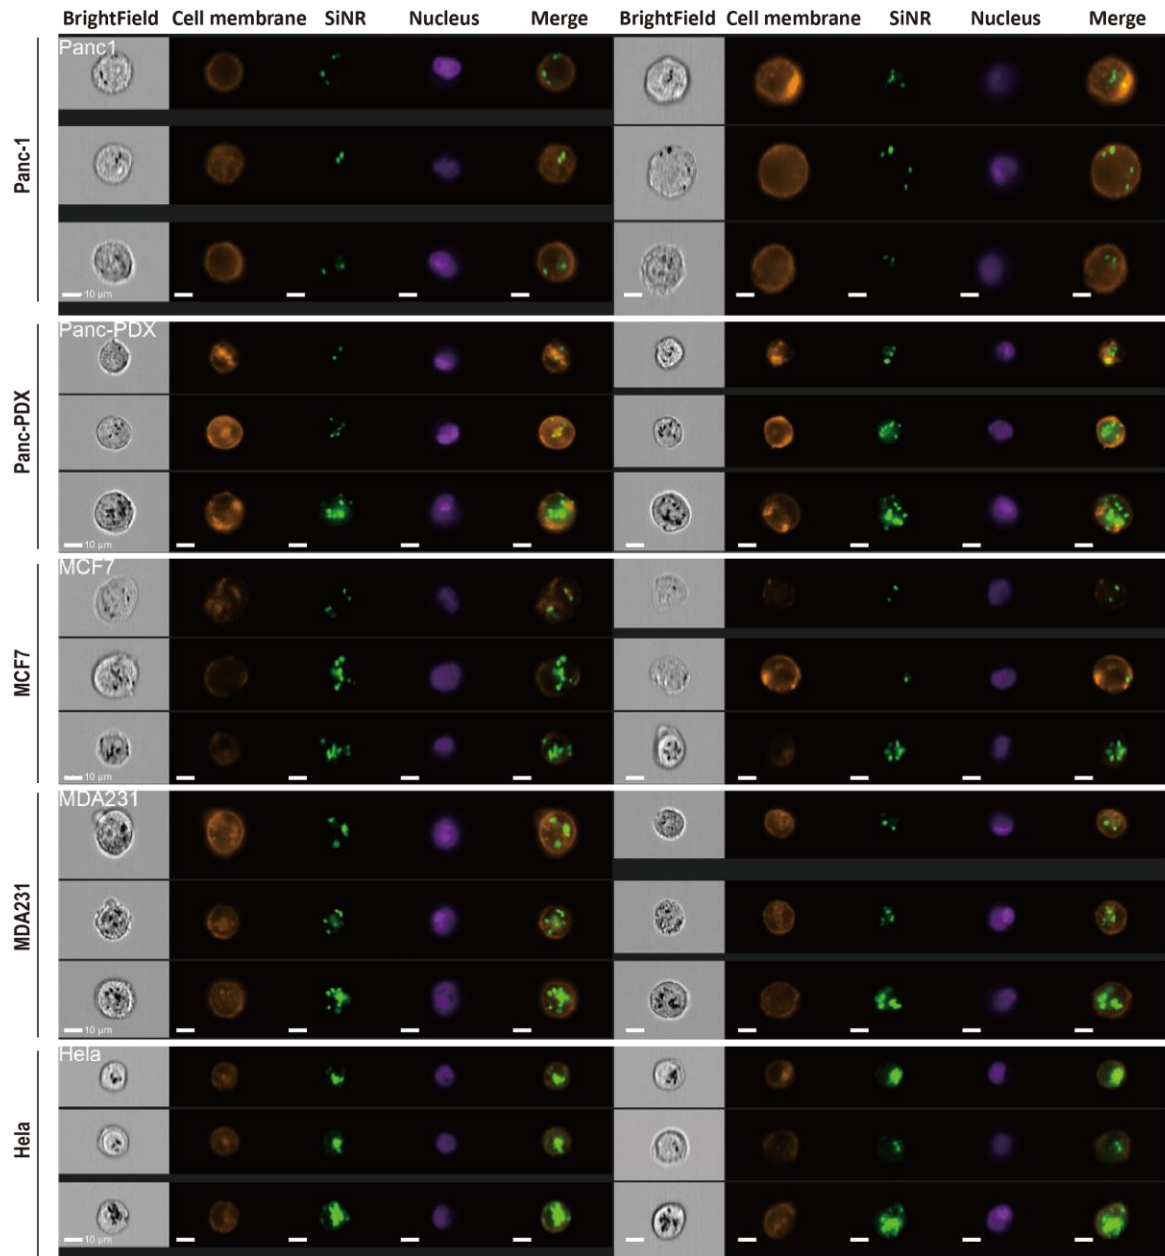

**Figure S4G.** HeLa-PM-coating for M-size SiNR (green, FITC channel) localized within five cell types. Six selected imaging cytometry images were indicated per cell line. Hoechst (purple) indicates the cell nucleus as determined by cytometry. Alexa-594 (orange) conjugated WGA staining shows the cell membrane. Cell membrane/SiNR merged channel indicates the location of SiNR inside the cell. The panels in one group of images are as follows from left to right: bright field, cell membrane, SiNR, nucleus, and merge of cell membrane and SiNR. Scale bar represents 10  $\mu\text{m}$ .

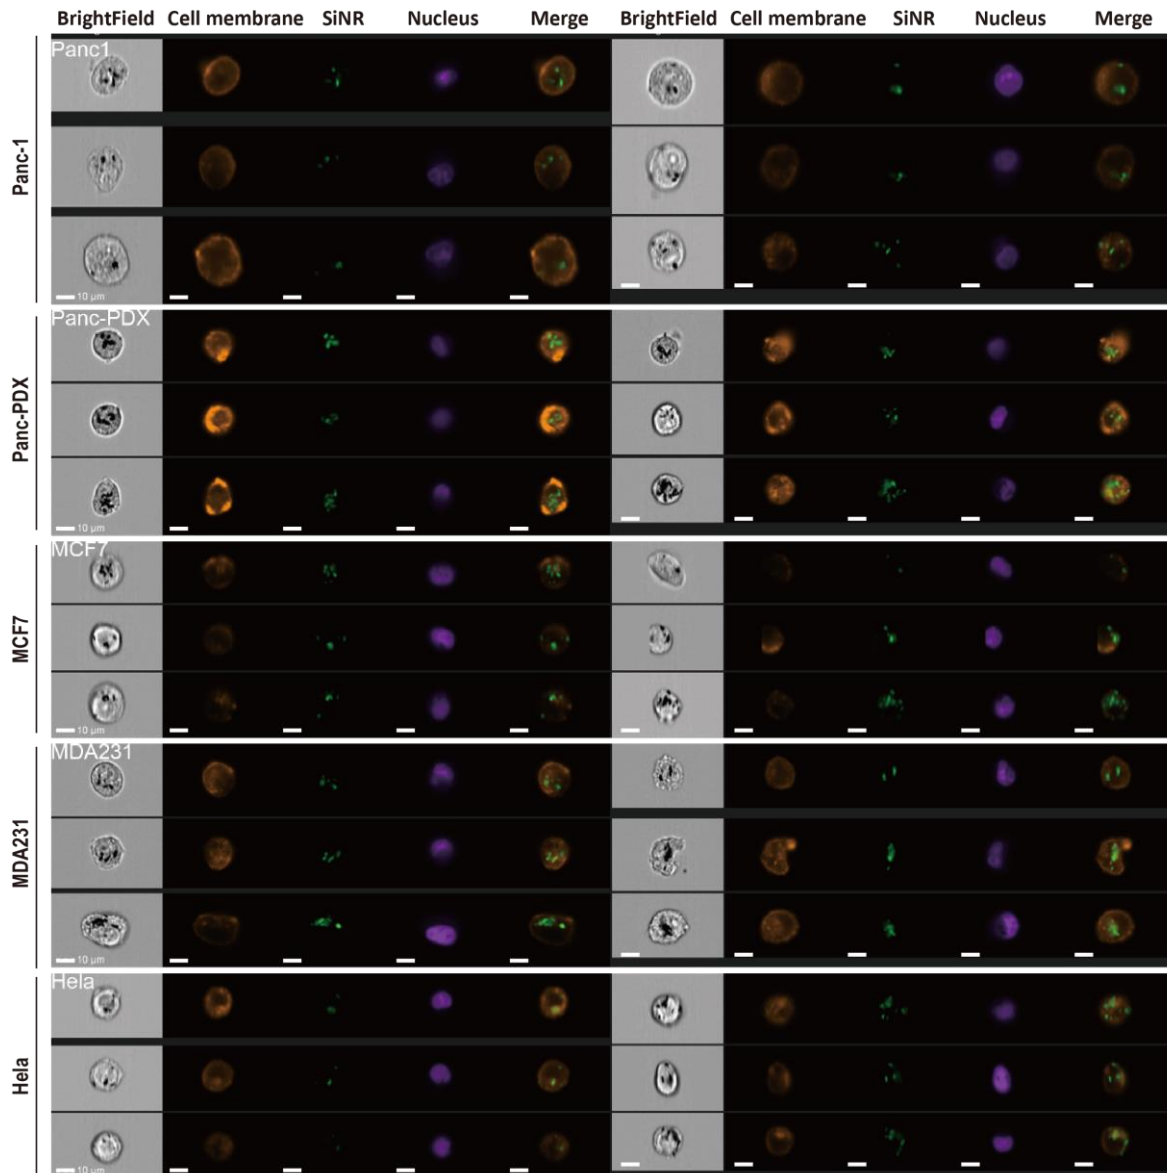

**Figure S4H.** Non-CMP-coating for M-size SiNR (green, FITC channel) localized within five cell types. Six selected imaging cytometry images were indicated per cell line. Hoechst (purple) indicates the cell nucleus as determined by cytometry. Alexa-594 (orange) conjugated WGA staining shows the cell membrane. Cell membrane/SiNR merged channel indicates the location of SiNR inside the cell. The panels in one group of images are as follows from left to right: bright field, cell membrane, SiNR, nucleus, and merge of cell membrane and SiNR. Scale bar represents 10  $\mu\text{m}$ .

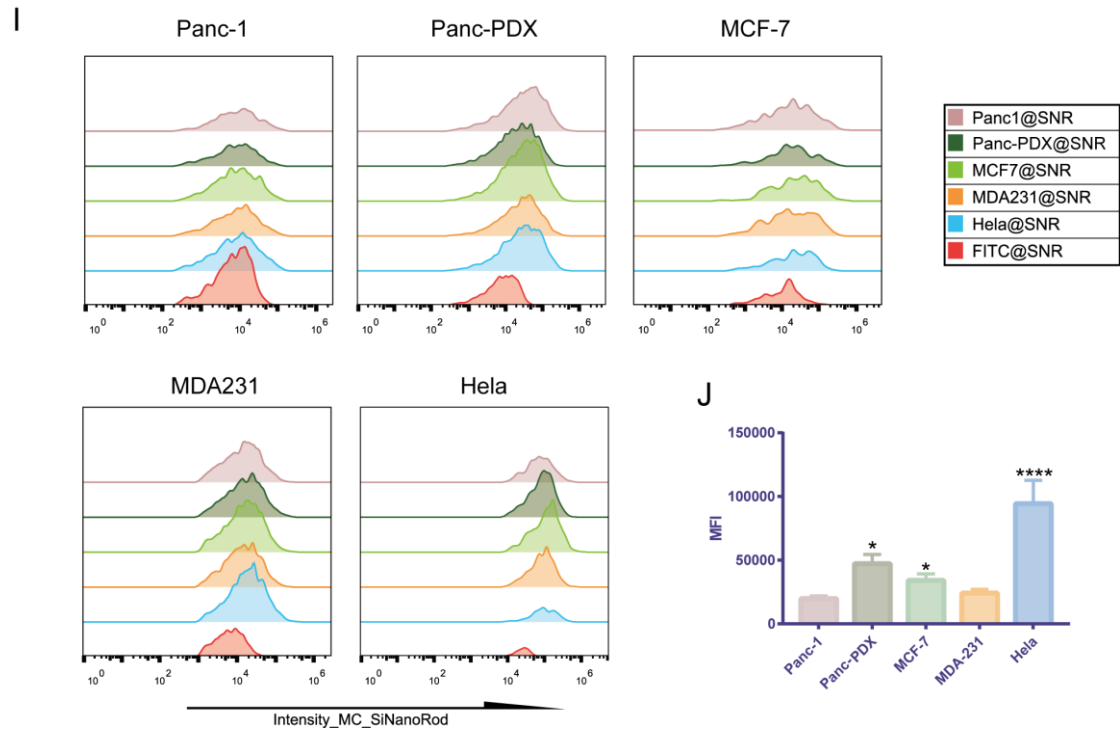

**Figure S4I.** (I) Histogram plot of M-size SiNR fluorescence intensity analysis. Raw data were exported from Amnis Ideas analysis software and analyzed in Flowjo VX. (J) Average MFI of M-size SiNR indicating internalization efficiency (\* $p < 0.05$ , \*\*\*\* $p < 0.0001$ ).

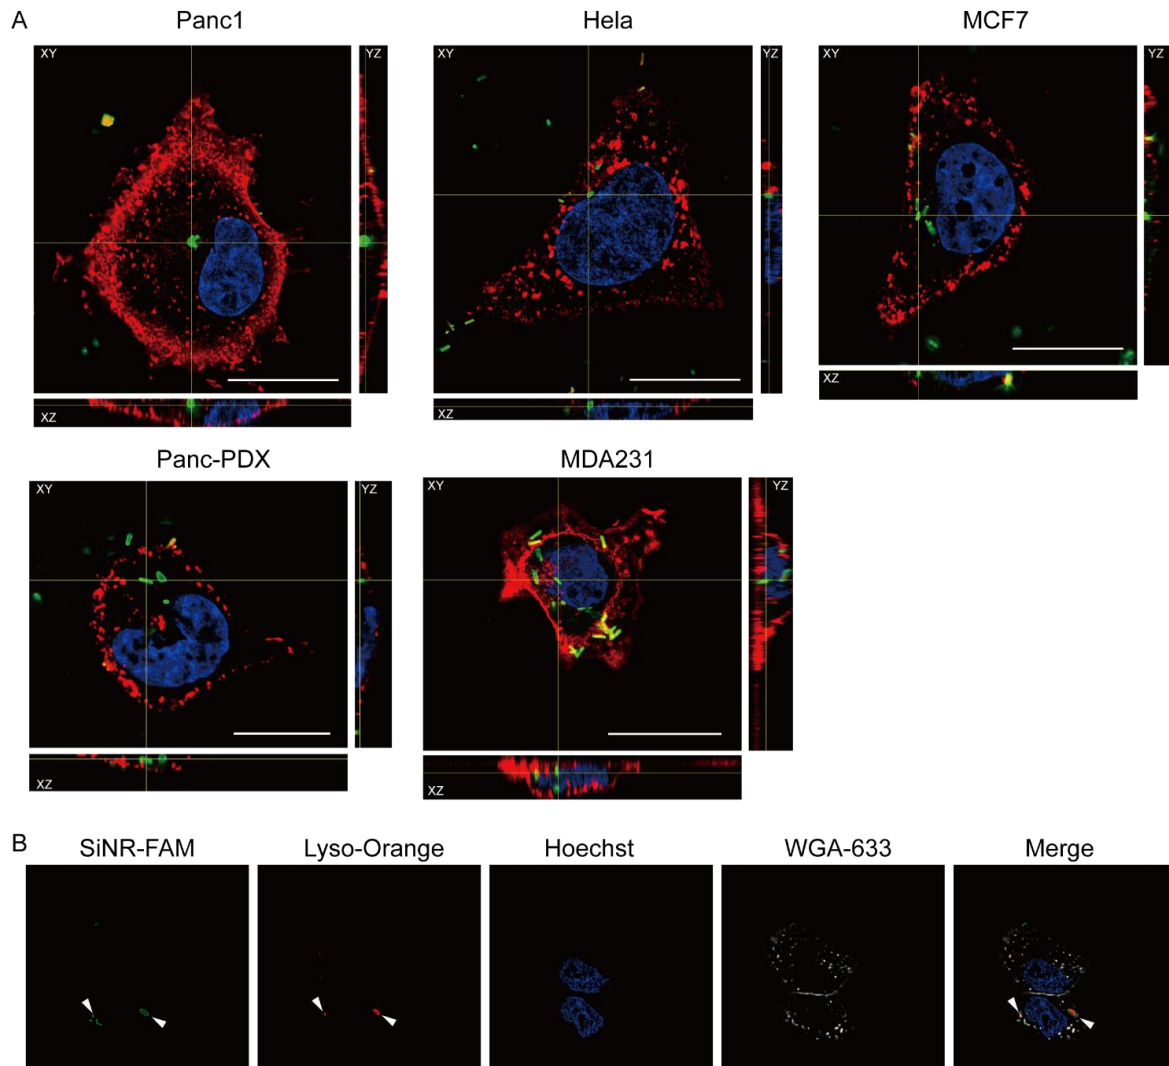

**Figure S5.** The detail confocal images of Panc1@SiNR internalized by five type cells. **(A)** Orthogonal views of five type cells to analyze the Panc1@SiNR uptake. Confocal Z-stack serial pictures were visualized as orthogonal section XY, YZ, and XZ planes. The crosshairs point the SiNR (in green) inside the cell body, observed in all three planes. The nuclei were labeled with Hoechst (in blue) and the cell membrane with Alexa-fluor-633-conjugated WGA (in red). Scale bars correspond to 20  $\mu\text{m}$ . **(B)** Colocalization of SiNR and lysosome in MCF7 cell. MCF7 cell were incubated with Panc1@SiNR (in green) for 6 h. Lysosome was stained with Lyso-Orange (in red), the nucleus were labeled with Hoechst (in blue), and the cell membrane with Alexa-fluor-633-conjugated WGA (in white).

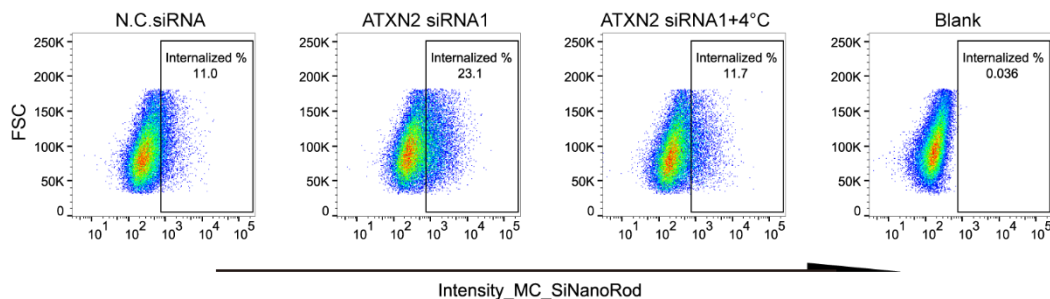

**Figure S6.** Spot plot of FSC (forward light scatter) vs. SiNR FAM fluorescence. Panc-1 cells with indicated treatment were incubated with Panc-PDX@SiNR. All cells subjected to analysis were first plotted by FSC vs. SSC (side light scatter), followed by gating for single cell population and then nucleus stained cells (Hoechst). "Internalized" gate was set for gating SiNR positive cells based on a blank control (no SiNR). For the 4  $^{\circ}\text{C}$  sample, cells were incubated with Panc-PDX@SiNR at 4  $^{\circ}\text{C}$ .

**Table S1A.** Stasis data of M-sized SiNR from imaging stream cytometry.

| Treatment            | Low% single cell | Medium% single cell | High% single cell | Internalized% single cell | Count All |
|----------------------|------------------|---------------------|-------------------|---------------------------|-----------|
| Panc1-Panc1@SiNR     | 3.5062           | 7.2462              | 7.1439            | 17.9547                   | 10000     |
| Panc1-PancPDX@SiNR   | 3.8737           | 8.8567              | 7.6621            | 20.4437                   | 10000     |
| Panc1-MCF7@SiNR      | 3.0723           | 6.109               | 5.1678            | 14.4557                   | 10000     |
| Panc1-MDA231@SiNR    | 2.6739           | 6.1066              | 4.7696            | 13.5863                   | 10000     |
| Panc1-Hela@SiNR      | 3.0772           | 6.4944              | 5.3893            | 15.0969                   | 10000     |
| Panc1-FAM@SiNR       | 1.7369           | 2.7343              | 0.6363            | 5.1419                    | 9523      |
| PancPDX-Panc1@SiNR   | 40.6301          | 16.3921             | 4.8394            | 63.612                    | 11849     |
| PancPDX-PancPDX@SiNR | 32.3478          | 21.3097             | 5.4534            | 60.0526                   | 10185     |
| PancPDX-MCF7@SiNR    | 36.5427          | 20.4728             | 7.2983            | 65.6844                   | 12000     |
| PancPDX-MDA231@SiNR  | 40.4728          | 20.0922             | 5.3618            | 67.3105                   | 10000     |
| PancPDX-Hela@SiNR    | 42.4975          | 17.8071             | 4.6091            | 66.3147                   | 9942      |
| PancPDX-FAM@SiNR     | 15.8722          | 12.3155             | 1.5485            | 29.9782                   | 10000     |
| MCF7-Panc1@SiNR      | 10.6977          | 12.2481             | 4.8062            | 27.7519                   | 2003      |
| MCF7-PancPDX@SiNR    | 11.0151          | 11.0151             | 6.9114            | 28.9417                   | 2048      |
| MCF7-MCF7@SiNR       | 17.8947          | 14.1053             | 4.8421            | 37.0526                   | 2048      |
| MCF7-MDA231@SiNR     | 13.0208          | 14.2361             | 6.0764            | 33.3333                   | 2048      |
| MCF7-Hela@SiNR       | 12.2396          | 14.0625             | 5.2083            | 31.5104                   | 2048      |
| MCF7-FAM@SiNR        | 3.25             | 5.5                 | 1.75              | 10.5                      | 2048      |
| MDA231-Panc1@SiNR    | 7.6581           | 23.5043             | 14.2393           | 45.453                    | 10000     |
| MDA231-PancPDX@SiNR  | 11.9102          | 27.4163             | 12.7854           | 52.2831                   | 10000     |
| MDA231-MCF7@SiNR     | 11.2323          | 27.2017             | 15.0903           | 53.622                    | 10000     |
| MDA231-MDA231@SiNR   | 7.3425           | 25.6016             | 15.0212           | 48.0538                   | 10000     |
| MDA231-Hela@SiNR     | 13.3521          | 30.2801             | 14.8318           | 58.7458                   | 10000     |
| MDA231-FAM@SiNR      | 1.0895           | 10.5992             | 4.6226            | 16.3113                   | 10000     |
| Hela-Panc1@SiNR      | 52.6252          | 24.7863             | 4.0293            | 84.8596                   | 4041      |
| Hela-PancPDX@SiNR    | 64.1691          | 21.0682             | 2.5223            | 91.9881                   | 4000      |
| Hela-MCF7@SiNR       | 65.2112          | 17.5376             | 1.9327            | 91.0523                   | 4000      |
| Hela-MDA231@SiNR     | 61.2263          | 23.8052             | 2.1641            | 88.1876                   | 4000      |
| Hela-Hela@SiNR       | 65.7407          | 21.5278             | 0.9259            | 89.5833                   | 1985      |
| Hela-FAM@SiNR        | 10.3704          | 14.4444             | 1.8519            | 26.6667                   | 2138      |

**Table S1B.** Stasis data of L-sized SiNRs from imaging stream cytometry.

| Treatment            | Low% single cell | Medium% single cell | High% single cell | Internalized% single cell | Count All |
|----------------------|------------------|---------------------|-------------------|---------------------------|-----------|
| Panc1-Panc1@SiNR     | 9.2442           | 8.8663              | 3.9826            | 22.1802                   | 7000      |
| Panc1-PancPDX@SiNR   | 5.3047           | 7.4266              | 2.8868            | 15.6427                   | 7000      |
| Panc1-MCF7@SiNR      | 6.8593           | 7.7754              | 3.5001            | 18.1348                   | 7000      |
| Panc1-MDA231@SiNR    | 5.9912           | 5.8903              | 2.7264            | 14.6079                   | 7000      |
| Panc1-Hela@SiNR      | 6.6531           | 6.4246              | 2.7679            | 15.871                    | 7000      |
| Panc1-FAM@SiNR       | 0.2311           | 0.2311              | 0.0385            | 0.5008                    | 7000      |
| PancPDX-Panc1@SiNR   | 1.9952           | 12.4466             | 66.7933           | 84.6081                   | 6000      |
| PancPDX-PancPDX@SiNR | 1.7255           | 13.9608             | 60.1569           | 77.8039                   | 10000     |
| PancPDX-MCF7@SiNR    | 2.5939           | 13.4471             | 62.3891           | 81.5017                   | 6000      |
| PancPDX-MDA231@SiNR  | 2.6968           | 12.0991             | 63.1924           | 82.1429                   | 6000      |
| PancPDX-Hela@SiNR    | 2.6777           | 11.6358             | 59.8832           | 78.1889                   | 6000      |
| PancPDX-FAM@SiNR     | 1.4184           | 4.154               | 1.8237            | 7.3961                    | 6000      |
| MCF7-Panc1@SiNR      | 4.9993           | 12.0571             | 13.5274           | 30.8337                   | 10000     |
| MCF7-PancPDX@SiNR    | 4.2034           | 11.2042             | 13.089            | 28.6313                   | 10000     |
| MCF7-MCF7@SiNR       | 4.772            | 11.9585             | 13.9611           | 30.8053                   | 10000     |
| MCF7-MDA231@SiNR     | 3.9293           | 10.5025             | 11.2328           | 25.7669                   | 10000     |
| MCF7-Hela@SiNR       | 4.48             | 10.5244             | 9.3156            | 24.4978                   | 10000     |
| MCF7-FAM@SiNR        | 1.0953           | 2.0537              | 1.0098            | 4.1759                    | 10000     |
| MDA231-Panc1@SiNR    | 7.1823           | 28.361              | 44.0147           | 80.0842                   | 5000      |
| MDA231-PancPDX@SiNR  | 12.6201          | 24.1512             | 15.6951           | 52.6372                   | 8000      |
| MDA231-MCF7@SiNR     | 10.9707          | 24.4439             | 17.998            | 53.64                     | 8000      |
| MDA231-MDA231@SiNR   | 10.9091          | 22.4324             | 19.1892           | 52.7273                   | 8000      |
| MDA231-Hela@SiNR     | 11.8067          | 23.9895             | 16.0368           | 51.9271                   | 8091      |
| MDA231-FAM@SiNR      | 1.2524           | 1.6378              | 0                 | 2.8902                    | 8000      |
| Hela-Panc1@SiNR      | 5.0931           | 21.5553             | 39.4171           | 66.4695                   | 10,000    |
| Hela-PancPDX@SiNR    | 3.8329           | 18.174              | 31.5245           | 53.9047                   | 10,000    |
| Hela-MCF7@SiNR       | 7.138            | 23.1063             | 22.4512           | 52.7774                   | 10,000    |
| Hela-MDA231@SiNR     | 6.3974           | 22.501              | 26.458            | 55.6046                   | 10,000    |
| Hela-Hela@SiNR       | 5.1439           | 20.5076             | 35.3262           | 61.659                    | 10,000    |
| Hela-FAM@SiNR        | 0.2023           | 0.2832              | 0.0405            | 0.5259                    | 10,000    |



**Table S1B.** Stasis data of S-sized SiNR from imaging stream cytometry.

| <b>Treatment</b>         | <b>Low%<br/>single cell</b> | <b>Medium%<br/>single cell</b> | <b>High%<br/>single cell</b> | <b>Internalized%<br/>single</b> | <b>Count<br/>All</b> |
|--------------------------|-----------------------------|--------------------------------|------------------------------|---------------------------------|----------------------|
| Panc1-<br>Panc1@SiNR     | 1.8361                      | 1.0112                         | 0.3193                       | 3.1666                          | 7000                 |
| Panc1-<br>PancPDX@SiNR   | 3.9519                      | 3.3873                         | 0.6627                       | 8.002                           | 7000                 |
| Panc1-<br>MCF7@SiNR      | 2.7383                      | 1.7308                         | 0.3875                       | 4.8566                          | 7000                 |
| Panc1-<br>MDA231@SiNR    | 2.8344                      | 2.2611                         | 0.5414                       | 5.6369                          | 7000                 |
| Panc1-Hela@SiNR          | 2.8137                      | 2.5873                         | 0.4851                       | 5.9185                          | 7000                 |
| Panc1-FAM@SiNR           | 1.7909                      | 1.6464                         | 0.2311                       | 3.6684                          | 7000                 |
| PancPDX-<br>Panc1@SiNR   | 3.2258                      | 17.1817                        | 53.6503                      | 75.8574                         | 5000                 |
| PancPDX-<br>PancPDX@SiNR | 3.1976                      | 16.6947                        | 58.7681                      | 80.1414                         | 5000                 |
| PancPDX-<br>MCF7@SiNR    | 3.6386                      | 17.2836                        | 53.2309                      | 76.0038                         | 5000                 |
| PancPDX-<br>MDA231@SiNR  | 2.5024                      | 13.0322                        | 61.5535                      | 79.948                          | 5000                 |
| PancPDX-<br>Hela@SiNR    | 1.7034                      | 13.434                         | 61.866                       | 81.3008                         | 5000                 |
| PancPDX-<br>FAM@SiNR     | 1.8441                      | 13.5003                        | 60.9603                      | 79.8191                         | 5000                 |
| MCF7-<br>Panc1@SiNR      | 2.2741                      | 3.909                          | 1.1742                       | 7.3722                          | 10,000               |
| MCF7-<br>PancPDX@SiNR    | 2.09                        | 4.0631                         | 1.5054                       | 7.6586                          | 10,000               |
| MCF7-<br>MCF7@SiNR       | 2.3306                      | 3.7175                         | 1.0438                       | 7.1633                          | 10,000               |
| MCF7-<br>MDA231@SiNR     | 1.2954                      | 2.2484                         | 0.4467                       | 3.9905                          | 10,000               |
| MCF7-Hela@SiNR           | 2.129                       | 3.2344                         | 1.1873                       | 6.5507                          | 10,000               |
| MCF7-FAM@SiNR            | 1.5478                      | 4.4203                         | 1.9646                       | 7.9476                          | 10,000               |
| MDA231-<br>Panc1@SiNR    | 3.4884                      | 26.5592                        | 50.6871                      | 81.3425                         | 6000                 |
| MDA231-<br>PancPDX@SiNR  | 4.7871                      | 26.138                         | 35.9178                      | 67.0191                         | 6000                 |
| MDA231-<br>MCF7@SiNR     | 4.8478                      | 28.5841                        | 40.3784                      | 74.1354                         | 6000                 |
| MDA231-<br>MDA231@SiNR   | 6.686                       | 25.8398                        | 26.3566                      | 59.0762                         | 6000                 |
| MDA231-<br>Hela@SiNR     | 4.8908                      | 24.1464                        | 38.4189                      | 67.9176                         | 6000                 |
| MDA231-<br>FAM@SiNR      | 9.9127                      | 26.7768                        | 15.8042                      | 52.6496                         | 6000                 |
| Hela-Panc1@SiNR          | 4.811                       | 18.666                         | 10.1218                      | 33.6301                         | 10,000               |
| Hela-<br>PancPDX@SiNR    | 4.0496                      | 13.4784                        | 6.9961                       | 24.524                          | 10,000               |
| Hela-MCF7@SiNR           | 4.8516                      | 19.971                         | 10.6155                      | 35.496                          | 10,000               |

|                  |        |         |        |         |        |
|------------------|--------|---------|--------|---------|--------|
| Hela-MDA231@SiNR | 3.5566 | 15.9968 | 7.7352 | 27.3046 | 10,000 |
| Hela-Hela@SiNR   | 3.9178 | 14.1424 | 6.3864 | 24.4466 | 10,000 |
| Hela-FAM@SiNR    | 3.3998 | 10.4045 | 2.7403 | 16.5445 | 10,000 |

**Table S2.** Common GO identifications shared in the five types of cells in gene enrichment.

| Cell Type | GO ID   | GO Term                                                                |
|-----------|---------|------------------------------------------------------------------------|
|           | 0044409 | entry into host                                                        |
|           | 0001618 | virus receptor activity                                                |
|           | 0002474 | antigen processing and presentation of peptide antigen via MHC class I |
|           | 0002478 | antigen processing and presentation of exogenous peptide antigen       |
|           | 0050839 | cell adhesion molecule binding                                         |
|           | 0098631 | cell adhesion mediator activity                                        |
|           | 0005924 | cell-substrate adherens junction                                       |
|           | 0005925 | focal adhesion                                                         |
|           | 0023026 | MHC class II protein complex binding                                   |
|           | 0030055 | cell-substrate junction                                                |
|           | 0030100 | regulation of endocytosis                                              |
|           | 0030120 | vesicle coat                                                           |
|           | 0030135 | coated vesicle                                                         |
| Common    | 0030136 | clathrin-coated vesicle                                                |
|           | 0030662 | coated vesicle membrane                                                |
|           | 0030665 | clathrin-coated vesicle membrane                                       |
|           | 0030666 | endocytic vesicle membrane                                             |
|           | 0030670 | phagocytic vesicle membrane                                            |
|           | 0034329 | cell junction assembly                                                 |
|           | 0034330 | cell junction organization                                             |
|           | 0042288 | MHC class I protein binding                                            |
|           | 0043112 | receptor metabolic process                                             |
|           | 0044291 | cell-cell contact zone                                                 |
|           | 0045121 | membrane raft                                                          |
|           | 0045296 | cadherin binding                                                       |
|           | 0045335 | phagocytic vesicle                                                     |
|           | 0072659 | protein localization to plasma membrane                                |

**Table S3.** Primers used in real-time PCR, hR18S and hTBP are reference genes.

| Gene   | Primer  | Sequence                        |
|--------|---------|---------------------------------|
| hATXN2 | Forward | 5'-AAGATATGGACTCCAGTTATGCAAA-3' |
|        | Reverse | 5'-CAAAGCCTCAAGTTCCTCAT-3'      |
| hSAA1  | Forward | 5'-CTGCAGAAGTGATCAGCG-3'        |
|        | Reverse | 5'-ATTGTGTACCCTCTCCCC-3'        |
| hMELTF | Forward | 5'-CCCTAAGTGGCGAGGACATTTAC-3'   |
|        | Reverse | 5'-TCATCCAAGGTGAAGGCGTG-3'      |
| hSRC   | Forward | 5'-ACCACCTTTGTGGCCCTCTATG-3'    |
|        | Reverse | 5'-GCCACCAGTCTCCCTCTGTGTT-3'    |
| hR18S  | Forward | 5'-AGAAACGGCTACCACATCCA-3'      |
|        | Reverse | 5'-CACCAGACTTGCCCTCCA-3'        |
| hTBP   | Forward | 5'-TGCACAGGAGCCAAGAGTGAA-3'     |
|        | Reverse | 5'-CACATCACAGCTCCCCACCA-3'      |

**Table S4.** Small interfere RNA sequence targeting human ATXN2. The sequence of N.C. (negative control) is nontargeting in the human genome.

| homo ATXN2 |            | Sequence                    |
|------------|------------|-----------------------------|
| siRNA1     | Sense      | 5'-CCUCGAAAUCACAGAGUUUTT-3' |
|            | Anti-sense | 5'-AAACUCUGUGAUUUCGAGGTT-3' |
| siRNA2     | Sense      | 5'-GCAUCGAACAGAGCUGUUATT-3' |
|            | Anti-sense | 5'-UAACAGCUCUGUUCGAUGCTT-3' |
| N.C.       | Sense      | 5'-UUCUCCGAACGUGUCACGUTT-3' |
|            | Anti-sense | 5'-ACGUGACACGUUCGGAGAATT-3' |
