# Supplementary material for: Internalization Characterization of Si Nanorod with Camouflaged Cell Membrane Proteins Reveals ATXN2 as a Negative Regulator
Source: Cells. 2019 Aug 19;8(8):931. doi: 10.3390/cells8080931 (PMC6721741; doi:10.3390/cells8080931)
Supplement: Supplementary file 1 [file cells-08-00931-s001.zip › SI File 2 Identified_proteins.xlsx]

## Sheet: Panc1
Accession	Description	Coverage	# Peptides	# PSMs	# Unique Peptides	# Protein Groups	# AAs	MW [kDa]	calc. pI
Q09666	Neuroblast differentiation-associated protein AHNAK OS=Homo sapiens GN=AHNAK PE=1 SV=2	56.944	159	211	159	1	5890	628.7	6.15
O43707	Alpha-actinin-4 OS=Homo sapiens GN=ACTN4 PE=1 SV=2	77.9363	59	100	41	1	911	104.8	5.44
P10809	60 kDa heat shock protein, mitochondrial OS=Homo sapiens GN=HSPD1 PE=1 SV=2	73.4729	42	80	42	1	573	61	5.87
P06576	ATP synthase subunit beta, mitochondrial OS=Homo sapiens GN=ATP5B PE=1 SV=3	64.0832	23	63	23	1	529	56.5	5.4
P11021	78 kDa glucose-regulated protein OS=Homo sapiens GN=HSPA5 PE=1 SV=2	55.1988	36	84	34	1	654	72.3	5.16
Q9Y4L1	Hypoxia up-regulated protein 1 OS=Homo sapiens GN=HYOU1 PE=1 SV=1	40.6406	32	53	32	1	999	111.3	5.22
Q14697	Neutral alpha-glucosidase AB OS=Homo sapiens GN=GANAB PE=1 SV=3	52.3305	38	55	2	1	944	106.8	6.14
P21333	Filamin-A OS=Homo sapiens GN=FLNA PE=1 SV=4	31.4696	49	54	45	1	2647	280.6	6.06
P14625	Endoplasmin OS=Homo sapiens GN=HSP90B1 PE=1 SV=1	48.9415	39	59	37	1	803	92.4	4.84
P14618	Pyruvate kinase PKM OS=Homo sapiens GN=PKM PE=1 SV=4	73.4463	36	54	36	1	531	57.9	7.84
Q14697	Isoform 2 of Neutral alpha-glucosidase AB OS=Homo sapiens GN=GANAB	50.9317	38	54	2	1	966	109.4	6.24
P38646	Stress-70 protein, mitochondrial OS=Homo sapiens GN=HSPA9 PE=1 SV=2	57.2901	33	61	33	1	679	73.6	6.16
Q00610	Clathrin heavy chain 1 OS=Homo sapiens GN=CLTC PE=1 SV=5	32.4179	40	51	40	1	1675	191.5	5.69
P13667	Protein disulfide-isomerase A4 OS=Homo sapiens GN=PDIA4 PE=1 SV=2	57.0543	35	59	35	1	645	72.9	5.07
P55072	Transitional endoplasmic reticulum ATPase OS=Homo sapiens GN=VCP PE=1 SV=4	62.4069	38	50	38	1	806	89.3	5.26
P13639	Elongation factor 2 OS=Homo sapiens GN=EEF2 PE=1 SV=4	54.5455	35	55	35	1	858	95.3	6.83
P30101	Protein disulfide-isomerase A3 OS=Homo sapiens GN=PDIA3 PE=1 SV=4	66.3366	32	54	32	1	505	56.7	6.35
P13645	Keratin, type I cytoskeletal 10 OS=Homo sapiens GN=KRT10 PE=1 SV=6	57.5342	31	51	30	1	584	58.8	5.21
P07237	Protein disulfide-isomerase OS=Homo sapiens GN=P4HB PE=1 SV=3	66.9291	34	54	34	1	508	57.1	4.87
P68104	Elongation factor 1-alpha 1 OS=Homo sapiens GN=EEF1A1 PE=1 SV=1	68.3983	25	68	15	1	462	50.1	9.01
P60709	Actin, cytoplasmic 1 OS=Homo sapiens GN=ACTB PE=1 SV=1	64	19	49	10	1	375	41.7	5.48
P11142	Heat shock cognate 71 kDa protein OS=Homo sapiens GN=HSPA8 PE=1 SV=1	56.6563	31	43	26	1	646	70.9	5.52
P27797	Calreticulin OS=Homo sapiens GN=CALR PE=1 SV=1	71.4628	22	55	22	1	417	48.1	4.44
P42704	Leucine-rich PPR motif-containing protein, mitochondrial OS=Homo sapiens GN=LRPPRC PE=1 SV=3	38.0918	40	49	40	1	1394	157.8	6.13
P08670	Vimentin OS=Homo sapiens GN=VIM PE=1 SV=4	75.3219	34	41	32	1	466	53.6	5.12
P07355	Isoform 2 of Annexin A2 OS=Homo sapiens GN=ANXA2	59.3838	24	42	24	1	357	40.4	8.37
P27824	Isoform 2 of Calnexin OS=Homo sapiens GN=CANX	57.5758	27	47	27	1	627	71.5	4.7
P06733	Alpha-enolase OS=Homo sapiens GN=ENO1 PE=1 SV=2	67.7419	22	36	22	1	434	47.1	7.39
Q13011	Delta(3,5)-Delta(2,4)-dienoyl-CoA isomerase, mitochondrial OS=Homo sapiens GN=ECH1 PE=1 SV=2	71.6463	17	64	17	1	328	35.8	8
P04075	Isoform 2 of Fructose-bisphosphate aldolase A OS=Homo sapiens GN=ALDOA	68.8995	24	38	20	1	418	45.2	8.25
P40939	Trifunctional enzyme subunit alpha, mitochondrial OS=Homo sapiens GN=HADHA PE=1 SV=2	48.0996	26	36	26	1	763	82.9	9.04
P04843	Dolichyl-diphosphooligosaccharide--protein glycosyltransferase subunit 1 OS=Homo sapiens GN=RPN1 PE=1 SV=1	54.201	26	34	26	1	607	68.5	6.38
P04844	Dolichyl-diphosphooligosaccharide--protein glycosyltransferase subunit 2 OS=Homo sapiens GN=RPN2 PE=1 SV=3	54.0412	21	27	21	1	631	69.2	5.69
P11413	Isoform Long of Glucose-6-phosphate 1-dehydrogenase OS=Homo sapiens GN=G6PD	60.4278	28	39	28	1	561	63.8	6.89
P04406	Glyceraldehyde-3-phosphate dehydrogenase OS=Homo sapiens GN=GAPDH PE=1 SV=3	66.5672	18	43	18	1	335	36	8.46
P0DMV9	Heat shock 70 kDa protein 1B OS=Homo sapiens GN=HSPA1B PE=1 SV=1	51.6381	27	38	23	1	641	70	5.66
O43852	Isoform 3 of Calumenin OS=Homo sapiens GN=CALU	64.3963	15	27	15	1	323	38	4.63
Q99714	3-hydroxyacyl-CoA dehydrogenase type-2 OS=Homo sapiens GN=HSD17B10 PE=1 SV=3	81.6092	15	29	15	1	261	26.9	7.78
P04264	Keratin, type II cytoskeletal 1 OS=Homo sapiens GN=KRT1 PE=1 SV=6	48.2919	28	37	23	1	644	66	8.12
P04181	Ornithine aminotransferase, mitochondrial OS=Homo sapiens GN=OAT PE=1 SV=1	72.4374	22	35	21	1	439	48.5	7.03
P05787	Isoform 2 of Keratin, type II cytoskeletal 8 OS=Homo sapiens GN=KRT8	59.2955	30	37	22	1	511	56.6	5.43
P35527	Keratin, type I cytoskeletal 9 OS=Homo sapiens GN=KRT9 PE=1 SV=3	49.1172	22	28	21	1	623	62	5.24
P25705	ATP synthase subunit alpha, mitochondrial OS=Homo sapiens GN=ATP5A1 PE=1 SV=1	53.1646	27	43	27	1	553	59.7	9.13
P06748	Nucleophosmin OS=Homo sapiens GN=NPM1 PE=1 SV=2	48.9796	10	28	10	1	294	32.6	4.78
P07339	Cathepsin D OS=Homo sapiens GN=CTSD PE=1 SV=1	45.3883	14	29	14	1	412	44.5	6.54
P07437	Tubulin beta chain OS=Homo sapiens GN=TUBB PE=1 SV=2	54.955	15	22	3	1	444	49.6	4.89
P35908	Keratin, type II cytoskeletal 2 epidermal OS=Homo sapiens GN=KRT2 PE=1 SV=2	45.3834	24	29	17	1	639	65.4	8
P08727	Keratin, type I cytoskeletal 19 OS=Homo sapiens GN=KRT19 PE=1 SV=4	61.25	23	29	21	1	400	44.1	5.14
Q86UP2	Kinectin OS=Homo sapiens GN=KTN1 PE=1 SV=1	27.266	28	32	28	1	1357	156.2	5.64
Q7KZF4	Staphylococcal nuclease domain-containing protein 1 OS=Homo sapiens GN=SND1 PE=1 SV=1	31.3187	18	24	18	1	910	101.9	7.17
Q9P2E9	Ribosome-binding protein 1 OS=Homo sapiens GN=RRBP1 PE=1 SV=4	23.5461	29	29	29	1	1410	152.4	8.6
P29401	Isoform 2 of Transketolase OS=Homo sapiens GN=TKT	35.3407	17	24	17	1	631	68.8	7.52
Q9UJZ1	Stomatin-like protein 2, mitochondrial OS=Homo sapiens GN=STOML2 PE=1 SV=1	60.3933	15	21	15	1	356	38.5	7.39
P19338	Nucleolin OS=Homo sapiens GN=NCL PE=1 SV=3	30.2817	21	25	21	1	710	76.6	4.7
P04040	Catalase OS=Homo sapiens GN=CAT PE=1 SV=3	49.7154	20	24	20	1	527	59.7	7.39
P13674	Prolyl 4-hydroxylase subunit alpha-1 OS=Homo sapiens GN=P4HA1 PE=1 SV=2	48.3146	19	25	1	1	534	61	6.01
P48735	Isocitrate dehydrogenase [NADP], mitochondrial OS=Homo sapiens GN=IDH2 PE=1 SV=2	46.4602	18	28	18	1	452	50.9	8.69
P08238	Heat shock protein HSP 90-beta OS=Homo sapiens GN=HSP90AB1 PE=1 SV=4	39.0884	26	34	14	1	724	83.2	5.03
P05783	Keratin, type I cytoskeletal 18 OS=Homo sapiens GN=KRT18 PE=1 SV=2	52.093	21	28	20	1	430	48	5.45
P13674	Isoform 2 of Prolyl 4-hydroxylase subunit alpha-1 OS=Homo sapiens GN=P4HA1	47.0037	19	25	1	1	534	60.9	6.01
Q9BSJ8	Isoform 2 of Extended synaptotagmin-1 OS=Homo sapiens GN=ESYT1	28.9048	17	23	17	1	1114	123.9	5.78
P68371	Tubulin beta-4B chain OS=Homo sapiens GN=TUBB4B PE=1 SV=1	46.9663	13	18	1	1	445	49.8	4.89
P12814	Isoform 4 of Alpha-actinin-1 OS=Homo sapiens GN=ACTN1	25.0538	20	27	2	1	930	107.1	5.58
Q15084	Isoform 2 of Protein disulfide-isomerase A6 OS=Homo sapiens GN=PDIA6	39.2276	14	23	14	1	492	53.9	5.33
P40926	Malate dehydrogenase, mitochondrial OS=Homo sapiens GN=MDH2 PE=1 SV=3	65.6805	18	25	18	1	338	35.5	8.68
P26599	Polypyrimidine tract-binding protein 1 OS=Homo sapiens GN=PTBP1 PE=1 SV=1	56.6855	16	24	16	1	531	57.2	9.17
P49411	Elongation factor Tu, mitochondrial OS=Homo sapiens GN=TUFM PE=1 SV=2	43.5841	19	25	19	1	452	49.5	7.61
P61978	Isoform 2 of Heterogeneous nuclear ribonucleoprotein K OS=Homo sapiens GN=HNRNPK	49.3534	17	24	17	1	464	51	5.33
P13804	Electron transfer flavoprotein subunit alpha, mitochondrial OS=Homo sapiens GN=ETFA PE=1 SV=1	60.0601	14	23	14	1	333	35.1	8.38
Q05639	Elongation factor 1-alpha 2 OS=Homo sapiens GN=EEF1A2 PE=1 SV=1	49.2441	14	31	4	1	463	50.4	9.03
Q06830	Peroxiredoxin-1 OS=Homo sapiens GN=PRDX1 PE=1 SV=1	71.3568	14	23	12	1	199	22.1	8.13
P22695	Cytochrome b-c1 complex subunit 2, mitochondrial OS=Homo sapiens GN=UQCRC2 PE=1 SV=3	45.2539	17	21	17	1	453	48.4	8.63
P14314	Glucosidase 2 subunit beta OS=Homo sapiens GN=PRKCSH PE=1 SV=2	37.1212	15	21	15	1	528	59.4	4.41
P23141	Isoform 2 of Liver carboxylesterase 1 OS=Homo sapiens GN=CES1	36.0915	14	22	14	1	568	62.6	6.6
P09622	Dihydrolipoyl dehydrogenase, mitochondrial OS=Homo sapiens GN=DLD PE=1 SV=2	40.275	16	21	16	1	509	54.1	7.85
P30084	Enoyl-CoA hydratase, mitochondrial OS=Homo sapiens GN=ECHS1 PE=1 SV=4	47.931	11	18	11	1	290	31.4	8.07
Q9NZM1	Myoferlin OS=Homo sapiens GN=MYOF PE=1 SV=1	13.149	19	20	19	1	2061	234.6	6.18
Q14764	Major vault protein OS=Homo sapiens GN=MVP PE=1 SV=4	34.3785	17	20	17	1	893	99.3	5.48
P31930	Cytochrome b-c1 complex subunit 1, mitochondrial OS=Homo sapiens GN=UQCRC1 PE=1 SV=3	33.5417	12	18	12	1	480	52.6	6.37
O95831	Apoptosis-inducing factor 1, mitochondrial OS=Homo sapiens GN=AIFM1 PE=1 SV=1	36.7047	19	24	19	1	613	66.9	8.95
Q9Y6N5	Sulfide:quinone oxidoreductase, mitochondrial OS=Homo sapiens GN=SQRDL PE=1 SV=1	42.8889	15	18	15	1	450	49.9	9.11
P36578	60S ribosomal protein L4 OS=Homo sapiens GN=RPL4 PE=1 SV=5	44.2623	19	22	19	1	427	47.7	11.06
Q07065	Cytoskeleton-associated protein 4 OS=Homo sapiens GN=CKAP4 PE=1 SV=2	34.7176	17	19	17	1	602	66	5.92
P24752	Acetyl-CoA acetyltransferase, mitochondrial OS=Homo sapiens GN=ACAT1 PE=1 SV=1	44.4965	13	18	13	1	427	45.2	8.85
P35232	Prohibitin OS=Homo sapiens GN=PHB PE=1 SV=1	81.6176	16	20	16	1	272	29.8	5.76
P05388	60S acidic ribosomal protein P0 OS=Homo sapiens GN=RPLP0 PE=1 SV=1	63.7224	16	20	16	1	317	34.3	5.97
P55084	Trifunctional enzyme subunit beta, mitochondrial OS=Homo sapiens GN=HADHB PE=1 SV=3	51.8987	21	22	21	1	474	51.3	9.41
P31040	Succinate dehydrogenase [ubiquinone] flavoprotein subunit, mitochondrial OS=Homo sapiens GN=SDHA PE=1 SV=2	40.8133	18	24	18	1	664	72.6	7.39
P22626	Heterogeneous nuclear ribonucleoproteins A2/B1 OS=Homo sapiens GN=HNRNPA2B1 PE=1 SV=2	44.1926	14	20	11	1	353	37.4	8.95
P26038	Moesin OS=Homo sapiens GN=MSN PE=1 SV=3	34.1421	18	21	12	1	577	67.8	6.4
O00469	Isoform 2 of Procollagen-lysine,2-oxoglutarate 5-dioxygenase 2 OS=Homo sapiens GN=PLOD2	26.3852	15	20	15	1	758	87	6.71
P21796	Voltage-dependent anion-selective channel protein 1 OS=Homo sapiens GN=VDAC1 PE=1 SV=2	69.258	13	17	12	1	283	30.8	8.54
Q99623	Prohibitin-2 OS=Homo sapiens GN=PHB2 PE=1 SV=2	60.8696	17	20	17	1	299	33.3	9.83
P11940	Polyadenylate-binding protein 1 OS=Homo sapiens GN=PABPC1 PE=1 SV=2	36.3208	16	21	10	1	636	70.6	9.5
P00558	Phosphoglycerate kinase 1 OS=Homo sapiens GN=PGK1 PE=1 SV=3	53.717	18	21	18	1	417	44.6	8.1
P07602	Isoform Sap-mu-9 of Prosaposin OS=Homo sapiens GN=PSAP	41.556	15	20	15	1	527	58.4	5.14
Q13162	Peroxiredoxin-4 OS=Homo sapiens GN=PRDX4 PE=1 SV=1	63.0996	12	19	10	1	271	30.5	6.29
P68363	Tubulin alpha-1B chain OS=Homo sapiens GN=TUBA1B PE=1 SV=1	34.8115	11	19	1	1	451	50.1	5.06
P07954	Fumarate hydratase, mitochondrial OS=Homo sapiens GN=FH PE=1 SV=3	43.9216	14	19	14	1	510	54.6	8.76
Q14247	Src substrate cortactin OS=Homo sapiens GN=CTTN PE=1 SV=2	40.3636	18	20	18	1	550	61.5	5.4
P67809	Nuclease-sensitive element-binding protein 1 OS=Homo sapiens GN=YBX1 PE=1 SV=3	45.9877	8	14	6	1	324	35.9	9.88
P34897	Serine hydroxymethyltransferase, mitochondrial OS=Homo sapiens GN=SHMT2 PE=1 SV=3	37.8968	15	21	15	1	504	56	8.53
P68032	Actin, alpha cardiac muscle 1 OS=Homo sapiens GN=ACTC1 PE=1 SV=1	27.5862	10	27	1	1	377	42	5.39
Q9BQE3	Tubulin alpha-1C chain OS=Homo sapiens GN=TUBA1C PE=1 SV=1	34.9666	11	19	1	1	449	49.9	5.1
P63241	Isoform 2 of Eukaryotic translation initiation factor 5A-1 OS=Homo sapiens GN=EIF5A	46.7391	10	16	10	1	184	20.2	7.01
P62937	Peptidyl-prolyl cis-trans isomerase A OS=Homo sapiens GN=PPIA PE=1 SV=2	63.6364	11	19	10	1	165	18	7.81
P80723	Brain acid soluble protein 1 OS=Homo sapiens GN=BASP1 PE=1 SV=2	63.4361	8	12	8	1	227	22.7	4.63
P00367	Glutamate dehydrogenase 1, mitochondrial OS=Homo sapiens GN=GLUD1 PE=1 SV=2	34.0502	16	18	16	1	558	61.4	7.8
Q99798	Aconitate hydratase, mitochondrial OS=Homo sapiens GN=ACO2 PE=1 SV=2	17.9487	11	13	11	1	780	85.4	7.61
P05387	60S acidic ribosomal protein P2 OS=Homo sapiens GN=RPLP2 PE=1 SV=1	80	7	12	7	1	115	11.7	4.54
P16435	NADPH--cytochrome P450 reductase OS=Homo sapiens GN=POR PE=1 SV=2	22.5997	9	13	9	1	677	76.6	5.58
P12956	X-ray repair cross-complementing protein 6 OS=Homo sapiens GN=XRCC6 PE=1 SV=2	27.2578	13	17	13	1	609	69.8	6.64
Q8NBS9	Thioredoxin domain-containing protein 5 OS=Homo sapiens GN=TXNDC5 PE=1 SV=2	39.5833	13	16	13	1	432	47.6	5.97
P05556	Integrin beta-1 OS=Homo sapiens GN=ITGB1 PE=1 SV=2	21.8045	15	19	15	1	798	88.4	5.39
P02786	Transferrin receptor protein 1 OS=Homo sapiens GN=TFRC PE=1 SV=2	23.4211	13	15	13	1	760	84.8	6.61
P62873	Guanine nucleotide-binding protein G(I)/G(S)/G(T) subunit beta-1 OS=Homo sapiens GN=GNB1 PE=1 SV=3	39.7059	11	16	5	1	340	37.4	6
P30044	Peroxiredoxin-5, mitochondrial OS=Homo sapiens GN=PRDX5 PE=1 SV=4	56.0748	11	15	11	1	214	22.1	8.7
Q96HE7	ERO1-like protein alpha OS=Homo sapiens GN=ERO1A PE=1 SV=2	38.8889	11	15	11	1	468	54.4	5.68
Q99832	T-complex protein 1 subunit eta OS=Homo sapiens GN=CCT7 PE=1 SV=2	29.6501	13	14	13	1	543	59.3	7.65
P35613	Basigin OS=Homo sapiens GN=BSG PE=1 SV=2	31.1688	9	12	9	1	385	42.2	5.66
P15311	Ezrin OS=Homo sapiens GN=EZR PE=1 SV=4	25.5973	15	18	9	1	586	69.4	6.27
P08865	40S ribosomal protein SA OS=Homo sapiens GN=RPSA PE=1 SV=4	53.8983	10	12	10	1	295	32.8	4.87
P45880	Isoform 1 of Voltage-dependent anion-selective channel protein 2 OS=Homo sapiens GN=VDAC2	38.835	10	15	10	1	309	33.4	7.59
Q00839	Heterogeneous nuclear ribonucleoprotein U OS=Homo sapiens GN=HNRNPU PE=1 SV=6	24.2424	15	16	15	1	825	90.5	6
Q6NZI2	Polymerase I and transcript release factor OS=Homo sapiens GN=PTRF PE=1 SV=1	30.5128	9	13	9	1	390	43.5	5.6
Q9NQC3	Isoform 2 of Reticulon-4 OS=Homo sapiens GN=RTN4	47.7212	9	14	9	1	373	40.3	4.78
P39023	60S ribosomal protein L3 OS=Homo sapiens GN=RPL3 PE=1 SV=2	38.9578	16	17	16	1	403	46.1	10.18
Q15293	Reticulocalbin-1 OS=Homo sapiens GN=RCN1 PE=1 SV=1	48.3384	12	15	12	1	331	38.9	5
Q3ZCQ8	Isoform 2 of Mitochondrial import inner membrane translocase subunit TIM50 OS=Homo sapiens GN=TIMM50	32.4561	15	21	15	1	456	50.4	9.42
P51149	Ras-related protein Rab-7a OS=Homo sapiens GN=RAB7A PE=1 SV=1	69.5652	12	15	12	1	207	23.5	6.7
Q02218	2-oxoglutarate dehydrogenase, mitochondrial OS=Homo sapiens GN=OGDH PE=1 SV=3	20.1369	14	17	14	1	1023	115.9	6.86
P62424	60S ribosomal protein L7a OS=Homo sapiens GN=RPL7A PE=1 SV=2	46.6165	12	16	12	1	266	30	10.61
P24539	ATP synthase F(0) complex subunit B1, mitochondrial OS=Homo sapiens GN=ATP5F1 PE=1 SV=2	43.3594	10	16	10	1	256	28.9	9.36
P63104	14-3-3 protein zeta/delta OS=Homo sapiens GN=YWHAZ PE=1 SV=1	60.4082	14	17	9	1	245	27.7	4.79
P39656	Dolichyl-diphosphooligosaccharide--protein glycosyltransferase 48 kDa subunit OS=Homo sapiens GN=DDOST PE=1 SV=4	39.693	11	14	11	1	456	50.8	6.55
P07900	Isoform 2 of Heat shock protein HSP 90-alpha OS=Homo sapiens GN=HSP90AA1	18.1499	14	18	4	1	854	98.1	5.16
P09651	Heterogeneous nuclear ribonucleoprotein A1 OS=Homo sapiens GN=HNRNPA1 PE=1 SV=5	36.5591	14	20	11	1	372	38.7	9.13
P13010	X-ray repair cross-complementing protein 5 OS=Homo sapiens GN=XRCC5 PE=1 SV=3	27.5956	12	14	12	1	732	82.7	5.81
P23284	Peptidyl-prolyl cis-trans isomerase B OS=Homo sapiens GN=PPIB PE=1 SV=2	49.537	12	15	12	1	216	23.7	9.41
P00338	Isoform 3 of L-lactate dehydrogenase A chain OS=Homo sapiens GN=LDHA	35.1801	10	12	10	1	361	39.8	8.43
O15460	Prolyl 4-hydroxylase subunit alpha-2 OS=Homo sapiens GN=P4HA2 PE=1 SV=1	27.8505	9	12	9	1	535	60.9	5.71
P36776	Lon protease homolog, mitochondrial OS=Homo sapiens GN=LONP1 PE=1 SV=2	17.2054	8	11	8	1	959	106.4	6.39
Q6DD88	Atlastin-3 OS=Homo sapiens GN=ATL3 PE=1 SV=1	24.9538	7	8	7	1	541	60.5	5.66
O75390	Citrate synthase, mitochondrial OS=Homo sapiens GN=CS PE=1 SV=2	40.1288	12	17	12	1	466	51.7	8.32
P32969	60S ribosomal protein L9 OS=Homo sapiens GN=RPL9 PE=1 SV=1	64.5833	8	12	8	1	192	21.9	9.95
O96008	Mitochondrial import receptor subunit TOM40 homolog OS=Homo sapiens GN=TOMM40 PE=1 SV=1	44.0443	10	11	10	1	361	37.9	7.25
Q07021	Complement component 1 Q subcomponent-binding protein, mitochondrial OS=Homo sapiens GN=C1QBP PE=1 SV=1	55.3191	8	11	8	1	282	31.3	4.84
P51659	Peroxisomal multifunctional enzyme type 2 OS=Homo sapiens GN=HSD17B4 PE=1 SV=3	20.6522	11	14	11	1	736	79.6	8.84
P50454	Serpin H1 OS=Homo sapiens GN=SERPINH1 PE=1 SV=2	35.4067	9	10	9	1	418	46.4	8.69
Q16891	MICOS complex subunit MIC60 OS=Homo sapiens GN=IMMT PE=1 SV=1	22.4274	11	11	11	1	758	83.6	6.48
Q15738	Sterol-4-alpha-carboxylate 3-dehydrogenase, decarboxylating OS=Homo sapiens GN=NSDHL PE=1 SV=2	38.6059	9	13	9	1	373	41.9	8.06
P18124	60S ribosomal protein L7 OS=Homo sapiens GN=RPL7 PE=1 SV=1	42.3387	10	17	10	1	248	29.2	10.65
P62879	Guanine nucleotide-binding protein G(I)/G(S)/G(T) subunit beta-2 OS=Homo sapiens GN=GNB2 PE=1 SV=3	46.4706	11	14	5	1	340	37.3	6
Q9HDC9	Adipocyte plasma membrane-associated protein OS=Homo sapiens GN=APMAP PE=1 SV=2	43.9904	12	14	12	1	416	46.5	6.16
P16615	Sarcoplasmic/endoplasmic reticulum calcium ATPase 2 OS=Homo sapiens GN=ATP2A2 PE=1 SV=1	18.5221	14	14	14	1	1042	114.7	5.34
Q16658	Fascin OS=Homo sapiens GN=FSCN1 PE=1 SV=3	31.8458	13	15	13	1	493	54.5	7.24
P30048	Thioredoxin-dependent peroxide reductase, mitochondrial OS=Homo sapiens GN=PRDX3 PE=1 SV=3	52.7344	9	13	9	1	256	27.7	7.78
P31946	14-3-3 protein beta/alpha OS=Homo sapiens GN=YWHAB PE=1 SV=3	48.374	12	17	6	1	246	28.1	4.83
P05023	Sodium/potassium-transporting ATPase subunit alpha-1 OS=Homo sapiens GN=ATP1A1 PE=1 SV=1	15.5425	12	14	12	1	1023	112.8	5.49
P62701	40S ribosomal protein S4, X isoform OS=Homo sapiens GN=RPS4X PE=1 SV=2	34.2205	11	15	11	1	263	29.6	10.15
P09429	High mobility group protein B1 OS=Homo sapiens GN=HMGB1 PE=1 SV=3	33.4884	7	10	7	1	215	24.9	5.74
P61224	Ras-related protein Rap-1b OS=Homo sapiens GN=RAP1B PE=1 SV=1	64.1304	10	14	10	1	184	20.8	5.78
P61247	40S ribosomal protein S3a OS=Homo sapiens GN=RPS3A PE=1 SV=2	45.4545	13	17	13	1	264	29.9	9.73
P54819	Adenylate kinase 2, mitochondrial OS=Homo sapiens GN=AK2 PE=1 SV=2	44.3515	8	13	8	1	239	26.5	7.81
P04792	Heat shock protein beta-1 OS=Homo sapiens GN=HSPB1 PE=1 SV=2	73.1707	9	12	9	1	205	22.8	6.4
P05362	Intercellular adhesion molecule 1 OS=Homo sapiens GN=ICAM1 PE=1 SV=2	25.5639	12	12	12	1	532	57.8	7.99
P61586	Transforming protein RhoA OS=Homo sapiens GN=RHOA PE=1 SV=1	65.285	9	13	2	1	193	21.8	6.1
Q00341	Vigilin OS=Homo sapiens GN=HDLBP PE=1 SV=2	12.6972	10	11	10	1	1268	141.4	6.87
P63010	Isoform 2 of AP-2 complex subunit beta OS=Homo sapiens GN=AP2B1	12.8286	6	7	4	1	951	105.6	5.34
Q12931	Heat shock protein 75 kDa, mitochondrial OS=Homo sapiens GN=TRAP1 PE=1 SV=3	19.8864	12	13	11	1	704	80.1	8.21
P61981	14-3-3 protein gamma OS=Homo sapiens GN=YWHAG PE=1 SV=2	53.0364	10	12	6	1	247	28.3	4.89
P31943	Heterogeneous nuclear ribonucleoprotein H OS=Homo sapiens GN=HNRNPH1 PE=1 SV=4	17.5947	5	9	3	1	449	49.2	6.3
Q9Y6C9	Mitochondrial carrier homolog 2 OS=Homo sapiens GN=MTCH2 PE=1 SV=1	35.6436	8	9	8	1	303	33.3	7.97
P48047	ATP synthase subunit O, mitochondrial OS=Homo sapiens GN=ATP5O PE=1 SV=1	52.1127	9	14	9	1	213	23.3	9.96
Q02818	Nucleobindin-1 OS=Homo sapiens GN=NUCB1 PE=1 SV=4	35.5748	13	14	12	1	461	53.8	5.25
P61313	60S ribosomal protein L15 OS=Homo sapiens GN=RPL15 PE=1 SV=2	43.1373	9	14	9	1	204	24.1	11.62
P23528	Cofilin-1 OS=Homo sapiens GN=CFL1 PE=1 SV=3	51.2048	7	10	6	1	166	18.5	8.09
P23396	40S ribosomal protein S3 OS=Homo sapiens GN=RPS3 PE=1 SV=2	62.963	14	14	14	1	243	26.7	9.66
P50991	T-complex protein 1 subunit delta OS=Homo sapiens GN=CCT4 PE=1 SV=4	23.1911	9	11	9	1	539	57.9	7.83
Q14444	Caprin-1 OS=Homo sapiens GN=CAPRIN1 PE=1 SV=2	19.0409	7	9	7	1	709	78.3	5.25
O00571	ATP-dependent RNA helicase DDX3X OS=Homo sapiens GN=DDX3X PE=1 SV=3	15.1057	7	8	7	1	662	73.2	7.18
Q9NSE4	Isoleucine--tRNA ligase, mitochondrial OS=Homo sapiens GN=IARS2 PE=1 SV=2	16.1067	11	13	11	1	1012	113.7	7.2
Q9Y265	RuvB-like 1 OS=Homo sapiens GN=RUVBL1 PE=1 SV=1	28.5088	9	11	9	1	456	50.2	6.42
P39060	Collagen alpha-1(XVIII) chain OS=Homo sapiens GN=COL18A1 PE=1 SV=5	8.83694	9	11	9	1	1754	178.1	6.01
P37802	Isoform 2 of Transgelin-2 OS=Homo sapiens GN=TAGLN2	41.3636	7	11	7	1	220	24.4	8.25
Q13310	Isoform 3 of Polyadenylate-binding protein 4 OS=Homo sapiens GN=PABPC4	16.8182	8	10	2	1	660	72.3	9.35
P20674	Cytochrome c oxidase subunit 5A, mitochondrial OS=Homo sapiens GN=COX5A PE=1 SV=2	57.3333	9	15	9	1	150	16.8	6.79
Q92616	eIF-2-alpha kinase activator GCN1 OS=Homo sapiens GN=GCN1 PE=1 SV=6	5.99027	7	9	7	1	2671	292.6	7.47
Q02878	60S ribosomal protein L6 OS=Homo sapiens GN=RPL6 PE=1 SV=3	37.1528	11	14	11	1	288	32.7	10.58
P62241	40S ribosomal protein S8 OS=Homo sapiens GN=RPS8 PE=1 SV=2	58.1731	11	12	11	1	208	24.2	10.32
Q96AG4	Leucine-rich repeat-containing protein 59 OS=Homo sapiens GN=LRRC59 PE=1 SV=1	30.6189	6	8	6	1	307	34.9	9.57
P47985	Cytochrome b-c1 complex subunit Rieske, mitochondrial OS=Homo sapiens GN=UQCRFS1 PE=1 SV=2	41.2409	8	10	8	1	274	29.6	8.32
Q9H2U2	Isoform 2 of Inorganic pyrophosphatase 2, mitochondrial OS=Homo sapiens GN=PPA2	35.2436	9	10	8	1	349	39.6	6.92
P11586	C-1-tetrahydrofolate synthase, cytoplasmic OS=Homo sapiens GN=MTHFD1 PE=1 SV=3	18.6096	11	13	11	1	935	101.5	7.3
P09601	Heme oxygenase 1 OS=Homo sapiens GN=HMOX1 PE=1 SV=1	38.1944	7	10	7	1	288	32.8	8.25
O76094	Signal recognition particle subunit SRP72 OS=Homo sapiens GN=SRP72 PE=1 SV=3	25.3353	9	10	9	1	671	74.6	9.26
P11717	Cation-independent mannose-6-phosphate receptor OS=Homo sapiens GN=IGF2R PE=1 SV=3	5.70052	7	7	7	1	2491	274.2	5.94
P12236	ADP/ATP translocase 3 OS=Homo sapiens GN=SLC25A6 PE=1 SV=4	42.2819	11	13	2	1	298	32.8	9.74
Q9UJS0	Isoform 2 of Calcium-binding mitochondrial carrier protein Aralar2 OS=Homo sapiens GN=SLC25A13	20.4142	8	8	5	1	676	74.3	8.62
P09382	Galectin-1 OS=Homo sapiens GN=LGALS1 PE=1 SV=2	70.3704	7	15	7	1	135	14.7	5.5
O43169	Cytochrome b5 type B OS=Homo sapiens GN=CYB5B PE=1 SV=2	74.6575	7	11	7	1	146	16.3	4.97
P06756	Integrin alpha-V OS=Homo sapiens GN=ITGAV PE=1 SV=2	12.8817	11	13	11	1	1048	116	5.68
P30837	Aldehyde dehydrogenase X, mitochondrial OS=Homo sapiens GN=ALDH1B1 PE=1 SV=3	28.4333	8	10	8	1	517	57.2	6.8
P00505	Aspartate aminotransferase, mitochondrial OS=Homo sapiens GN=GOT2 PE=1 SV=3	37.4419	12	13	12	1	430	47.5	9.01
P27348	14-3-3 protein theta OS=Homo sapiens GN=YWHAQ PE=1 SV=1	35.5102	11	13	5	1	245	27.7	4.78
P14866	Heterogeneous nuclear ribonucleoprotein L OS=Homo sapiens GN=HNRNPL PE=1 SV=2	28.6927	11	13	11	1	589	64.1	8.22
P49327	Fatty acid synthase OS=Homo sapiens GN=FASN PE=1 SV=3	6.05337	7	7	7	1	2511	273.3	6.44
Q15155	Nodal modulator 1 OS=Homo sapiens GN=NOMO1 PE=1 SV=5	11.4566	8	11	8	1	1222	134.2	5.81
O95994	Anterior gradient protein 2 homolog OS=Homo sapiens GN=AGR2 PE=1 SV=1	36	5	8	5	1	175	20	9
P32322	Isoform 3 of Pyrroline-5-carboxylate reductase 1, mitochondrial OS=Homo sapiens GN=PYCR1	32.3699	8	9	7	1	346	36	7.61
Q15691	Microtubule-associated protein RP/EB family member 1 OS=Homo sapiens GN=MAPRE1 PE=1 SV=3	42.5373	8	11	8	1	268	30	5.14
P27635	60S ribosomal protein L10 OS=Homo sapiens GN=RPL10 PE=1 SV=4	42.0561	8	12	8	1	214	24.6	10.08
P60842	Eukaryotic initiation factor 4A-I OS=Homo sapiens GN=EIF4A1 PE=1 SV=1	27.0936	11	12	11	1	406	46.1	5.48
P22307	Non-specific lipid-transfer protein OS=Homo sapiens GN=SCP2 PE=1 SV=2	18.6472	11	12	11	1	547	59	6.89
Q8NC51	Isoform 3 of Plasminogen activator inhibitor 1 RNA-binding protein OS=Homo sapiens GN=SERBP1	35.6234	9	12	9	1	393	43.1	8.44
Q9H488	GDP-fucose protein O-fucosyltransferase 1 OS=Homo sapiens GN=POFUT1 PE=1 SV=1	25	7	9	7	1	388	43.9	8.53
O43399	Isoform 7 of Tumor protein D54 OS=Homo sapiens GN=TPD52L2	48.0349	7	9	7	1	229	24.8	6.42
O00264	Membrane-associated progesterone receptor component 1 OS=Homo sapiens GN=PGRMC1 PE=1 SV=3	47.1795	8	10	7	1	195	21.7	4.7
P09972	Fructose-bisphosphate aldolase C OS=Homo sapiens GN=ALDOC PE=1 SV=2	17.8571	5	10	1	1	364	39.4	6.87
P02649	Apolipoprotein E OS=Homo sapiens GN=APOE PE=1 SV=1	33.123	8	9	8	1	317	36.1	5.73
Q9Y490	Talin-1 OS=Homo sapiens GN=TLN1 PE=1 SV=3	7.04447	8	8	8	1	2541	269.6	6.07
O75369	Filamin-B OS=Homo sapiens GN=FLNB PE=1 SV=2	8.33974	13	13	9	1	2602	278	5.73
P78371	T-complex protein 1 subunit beta OS=Homo sapiens GN=CCT2 PE=1 SV=4	21.1215	8	10	8	1	535	57.5	6.46
P14854	Cytochrome c oxidase subunit 6B1 OS=Homo sapiens GN=COX6B1 PE=1 SV=2	66.2791	6	10	6	1	86	10.2	7.05
P07099	Epoxide hydrolase 1 OS=Homo sapiens GN=EPHX1 PE=1 SV=1	33.6264	11	13	11	1	455	52.9	7.25
P49368	T-complex protein 1 subunit gamma OS=Homo sapiens GN=CCT3 PE=1 SV=4	28.0734	11	11	11	1	545	60.5	6.49
Q15366	Isoform 2 of Poly(rC)-binding protein 2 OS=Homo sapiens GN=PCBP2	34.6995	8	8	6	1	366	38.6	6.79
P62258	14-3-3 protein epsilon OS=Homo sapiens GN=YWHAE PE=1 SV=1	42.3529	10	13	7	1	255	29.2	4.74
Q9BS26	Endoplasmic reticulum resident protein 44 OS=Homo sapiens GN=ERP44 PE=1 SV=1	25.1232	7	8	7	1	406	46.9	5.26
P52597	Heterogeneous nuclear ribonucleoprotein F OS=Homo sapiens GN=HNRNPF PE=1 SV=3	18.3133	5	9	3	1	415	45.6	5.58
P17931	Galectin-3 OS=Homo sapiens GN=LGALS3 PE=1 SV=5	28.4	8	11	8	1	250	26.1	8.56
P05141	ADP/ATP translocase 2 OS=Homo sapiens GN=SLC25A5 PE=1 SV=7	41.2752	12	14	3	1	298	32.8	9.69
P13693	Translationally-controlled tumor protein OS=Homo sapiens GN=TPT1 PE=1 SV=1	60.4651	7	10	7	1	172	19.6	4.93
P08134	Rho-related GTP-binding protein RhoC OS=Homo sapiens GN=RHOC PE=1 SV=1	59.0674	8	11	1	1	193	22	6.58
Q12797	Aspartyl/asparaginyl beta-hydroxylase OS=Homo sapiens GN=ASPH PE=1 SV=3	16.095	6	11	6	1	758	85.8	5.01
P16070	CD44 antigen OS=Homo sapiens GN=CD44 PE=1 SV=3	9.16442	6	10	6	1	742	81.5	5.33
P63244	Receptor of activated protein C kinase 1 OS=Homo sapiens GN=RACK1 PE=1 SV=3	38.8013	9	10	9	1	317	35.1	7.69
Q9GZT3	SRA stem-loop-interacting RNA-binding protein, mitochondrial OS=Homo sapiens GN=SLIRP PE=1 SV=1	65.1376	7	9	7	1	109	12.3	10.24
Q96AB3	Isoform 2 of Isochorismatase domain-containing protein 2 OS=Homo sapiens GN=ISOC2	41.1765	5	8	5	1	221	24.1	7.77
P38117	Isoform 2 of Electron transfer flavoprotein subunit beta OS=Homo sapiens GN=ETFB	27.4566	8	9	8	1	346	37.4	7.17
P36957	Dihydrolipoyllysine-residue succinyltransferase component of 2-oxoglutarate dehydrogenase complex, mitochondrial OS=Homo sapiens GN=DLST PE=1 SV=4	32.0088	9	12	9	1	453	48.7	8.95
Q9H9B4	Sideroflexin-1 OS=Homo sapiens GN=SFXN1 PE=1 SV=4	34.7826	9	10	9	1	322	35.6	9.07
P51572	Isoform 2 of B-cell receptor-associated protein 31 OS=Homo sapiens GN=BCAP31	28.4345	12	13	12	1	313	34.7	7.84
P18206	Vinculin OS=Homo sapiens GN=VCL PE=1 SV=4	11.3757	7	10	7	1	1134	123.7	5.66
O75947	ATP synthase subunit d, mitochondrial OS=Homo sapiens GN=ATP5H PE=1 SV=3	57.764	8	13	8	1	161	18.5	5.3
P42126	Enoyl-CoA delta isomerase 1, mitochondrial OS=Homo sapiens GN=ECI1 PE=1 SV=1	31.7881	7	7	7	1	302	32.8	8.54
P30040	Endoplasmic reticulum resident protein 29 OS=Homo sapiens GN=ERP29 PE=1 SV=4	39.4636	8	10	8	1	261	29	7.31
P08708	40S ribosomal protein S17 OS=Homo sapiens GN=RPS17 PE=1 SV=2	56.2963	7	10	7	1	135	15.5	9.85
P10515	Dihydrolipoyllysine-residue acetyltransferase component of pyruvate dehydrogenase complex, mitochondrial OS=Homo sapiens GN=DLAT PE=1 SV=3	24.575	9	9	9	1	647	69	7.84
P11310	Isoform 2 of Medium-chain specific acyl-CoA dehydrogenase, mitochondrial OS=Homo sapiens GN=ACADM	25.1765	11	11	11	1	425	47	8.31
P35241	Isoform 5 of Radixin OS=Homo sapiens GN=RDX	17.2185	11	13	5	1	604	71	6.71
Q15165	Serum paraoxonase/arylesterase 2 OS=Homo sapiens GN=PON2 PE=1 SV=3	29.9435	5	6	5	1	354	39.4	5.6
Q9NP81	Serine--tRNA ligase, mitochondrial OS=Homo sapiens GN=SARS2 PE=1 SV=1	18.3398	7	7	7	1	518	58.2	8.13
P40763	Signal transducer and activator of transcription 3 OS=Homo sapiens GN=STAT3 PE=1 SV=2	16.7532	6	7	6	1	770	88	6.3
Q9HAV7	GrpE protein homolog 1, mitochondrial OS=Homo sapiens GN=GRPEL1 PE=1 SV=2	47.0046	9	10	9	1	217	24.3	8.12
P61158	Actin-related protein 3 OS=Homo sapiens GN=ACTR3 PE=1 SV=3	32.2967	8	8	8	1	418	47.3	5.88
Q9NYU2	UDP-glucose:glycoprotein glucosyltransferase 1 OS=Homo sapiens GN=UGGT1 PE=1 SV=3	8.48875	6	6	6	1	1555	177.1	5.63
P62750	60S ribosomal protein L23a OS=Homo sapiens GN=RPL23A PE=1 SV=1	42.3077	10	14	10	1	156	17.7	10.45
P46777	60S ribosomal protein L5 OS=Homo sapiens GN=RPL5 PE=1 SV=3	27.9461	9	12	9	1	297	34.3	9.72
P13647	Keratin, type II cytoskeletal 5 OS=Homo sapiens GN=KRT5 PE=1 SV=3	16.2712	13	14	3	1	590	62.3	7.74
Q14257	Isoform 2 of Reticulocalbin-2 OS=Homo sapiens GN=RCN2	24.4776	6	8	6	1	335	39.1	4.45
O94826	Mitochondrial import receptor subunit TOM70 OS=Homo sapiens GN=TOMM70 PE=1 SV=1	11.6776	5	8	5	1	608	67.4	7.12
Q16718	NADH dehydrogenase [ubiquinone] 1 alpha subcomplex subunit 5 OS=Homo sapiens GN=NDUFA5 PE=1 SV=3	44.8276	4	5	4	1	116	13.5	5.99
P26641	Isoform 2 of Elongation factor 1-gamma OS=Homo sapiens GN=EEF1G	22.9979	11	12	11	1	487	56.1	7.72
P04899	Isoform sGi2 of Guanine nucleotide-binding protein G(i) subunit alpha-2 OS=Homo sapiens GN=GNAI2	25.6831	6	7	4	1	366	41.5	5.99
O00425	Insulin-like growth factor 2 mRNA-binding protein 3 OS=Homo sapiens GN=IGF2BP3 PE=1 SV=2	15.0259	6	10	4	1	579	63.7	8.87
P30050	60S ribosomal protein L12 OS=Homo sapiens GN=RPL12 PE=1 SV=1	60	8	9	8	1	165	17.8	9.42
Q9H0U4	Ras-related protein Rab-1B OS=Homo sapiens GN=RAB1B PE=1 SV=1	49.7512	9	11	2	1	201	22.2	5.73
P15880	40S ribosomal protein S2 OS=Homo sapiens GN=RPS2 PE=1 SV=2	36.8601	10	12	10	1	293	31.3	10.24
Q9UQ80	Proliferation-associated protein 2G4 OS=Homo sapiens GN=PA2G4 PE=1 SV=3	34.5178	10	11	10	1	394	43.8	6.55
Q08431	Lactadherin OS=Homo sapiens GN=MFGE8 PE=1 SV=2	24.031	7	7	7	1	387	43.1	8.15
O60313	Isoform 2 of Dynamin-like 120 kDa protein, mitochondrial OS=Homo sapiens GN=OPA1	12.0361	9	9	9	1	997	115.8	7.87
P46778	60S ribosomal protein L21 OS=Homo sapiens GN=RPL21 PE=1 SV=2	45	7	9	7	1	160	18.6	10.49
P23368	NAD-dependent malic enzyme, mitochondrial OS=Homo sapiens GN=ME2 PE=1 SV=1	23.9726	6	8	6	1	584	65.4	7.61
P51991	Heterogeneous nuclear ribonucleoprotein A3 OS=Homo sapiens GN=HNRNPA3 PE=1 SV=2	20.3704	7	10	6	1	378	39.6	9.01
P52815	39S ribosomal protein L12, mitochondrial OS=Homo sapiens GN=MRPL12 PE=1 SV=2	45.9596	6	7	6	1	198	21.3	8.87
P18859	Isoform 2 of ATP synthase-coupling factor 6, mitochondrial OS=Homo sapiens GN=ATP5J	42.2414	4	7	4	1	116	13.4	9.07
P28838	Cytosol aminopeptidase OS=Homo sapiens GN=LAP3 PE=1 SV=3	22.3507	8	8	8	1	519	56.1	7.93
O75489	NADH dehydrogenase [ubiquinone] iron-sulfur protein 3, mitochondrial OS=Homo sapiens GN=NDUFS3 PE=1 SV=1	26.1364	6	7	6	1	264	30.2	7.5
P39019	40S ribosomal protein S19 OS=Homo sapiens GN=RPS19 PE=1 SV=2	50.3448	10	10	10	1	145	16.1	10.32
O60506	Heterogeneous nuclear ribonucleoprotein Q OS=Homo sapiens GN=SYNCRIP PE=1 SV=2	15.2488	8	8	5	1	623	69.6	8.59
P29966	Myristoylated alanine-rich C-kinase substrate OS=Homo sapiens GN=MARCKS PE=1 SV=4	30.4217	4	4	4	1	332	31.5	4.45
Q9Y678	Coatomer subunit gamma-1 OS=Homo sapiens GN=COPG1 PE=1 SV=1	11.3272	6	6	6	1	874	97.7	5.47
P01892	HLA class I histocompatibility antigen, A-2 alpha chain OS=Homo sapiens GN=HLA-A PE=1 SV=1	25.4795	6	6	3	1	365	40.9	6.99
P17987	T-complex protein 1 subunit alpha OS=Homo sapiens GN=TCP1 PE=1 SV=1	21.223	9	9	9	1	556	60.3	6.11
Q15365	Poly(rC)-binding protein 1 OS=Homo sapiens GN=PCBP1 PE=1 SV=2	28.9326	7	8	5	1	356	37.5	7.09
O14773	Tripeptidyl-peptidase 1 OS=Homo sapiens GN=TPP1 PE=1 SV=2	12.9663	4	5	4	1	563	61.2	6.48
P31937	3-hydroxyisobutyrate dehydrogenase, mitochondrial OS=Homo sapiens GN=HIBADH PE=1 SV=2	29.7619	6	6	6	1	336	35.3	8.13
P62158	Calmodulin OS=Homo sapiens GN=CALM1 PE=1 SV=2	30.8725	3	6	3	1	149	16.8	4.22
P51148	Isoform 2 of Ras-related protein Rab-5C OS=Homo sapiens GN=RAB5C	29.3173	6	7	6	1	249	27	8.66
Q9UQ35	Serine/arginine repetitive matrix protein 2 OS=Homo sapiens GN=SRRM2 PE=1 SV=2	3.52471	6	6	6	1	2752	299.4	12.06
P61604	10 kDa heat shock protein, mitochondrial OS=Homo sapiens GN=HSPE1 PE=1 SV=2	67.6471	9	13	9	1	102	10.9	8.92
O75844	CAAX prenyl protease 1 homolog OS=Homo sapiens GN=ZMPSTE24 PE=1 SV=2	21.8947	7	10	7	1	475	54.8	7.49
P49755	Transmembrane emp24 domain-containing protein 10 OS=Homo sapiens GN=TMED10 PE=1 SV=2	22.3744	4	8	4	1	219	25	7.44
P30492	HLA class I histocompatibility antigen, B-54 alpha chain OS=Homo sapiens GN=HLA-B PE=1 SV=1	22.6519	6	7	3	1	362	40.4	6.3
P60174	Triosephosphate isomerase OS=Homo sapiens GN=TPI1 PE=1 SV=3	34.6154	6	6	6	1	286	30.8	5.92
Q9Y6M1	Insulin-like growth factor 2 mRNA-binding protein 2 OS=Homo sapiens GN=IGF2BP2 PE=1 SV=2	14.8581	6	9	4	1	599	66.1	8.46
P35221	Isoform 2 of Catenin alpha-1 OS=Homo sapiens GN=CTNNA1	12.5806	6	7	6	1	930	102.6	6.34
P22234	Multifunctional protein ADE2 OS=Homo sapiens GN=PAICS PE=1 SV=3	19.2941	5	6	5	1	425	47	7.23
P62081	40S ribosomal protein S7 OS=Homo sapiens GN=RPS7 PE=1 SV=1	47.4227	6	9	6	1	194	22.1	10.1
Q9H4M9	EH domain-containing protein 1 OS=Homo sapiens GN=EHD1 PE=1 SV=2	16.6667	6	8	6	1	534	60.6	6.83
Q9NZI8	Insulin-like growth factor 2 mRNA-binding protein 1 OS=Homo sapiens GN=IGF2BP1 PE=1 SV=2	15.5979	7	8	6	1	577	63.4	9.2
P62917	60S ribosomal protein L8 OS=Homo sapiens GN=RPL8 PE=1 SV=2	33.463	8	11	8	1	257	28	11.03
P46940	Ras GTPase-activating-like protein IQGAP1 OS=Homo sapiens GN=IQGAP1 PE=1 SV=1	5.4315	4	4	4	1	1657	189.1	6.48
P35637	RNA-binding protein FUS OS=Homo sapiens GN=FUS PE=1 SV=1	10.4563	5	6	5	1	526	53.4	9.36
P11177	Pyruvate dehydrogenase E1 component subunit beta, mitochondrial OS=Homo sapiens GN=PDHB PE=1 SV=3	26.7409	7	9	7	1	359	39.2	6.65
Q9NR30	Nucleolar RNA helicase 2 OS=Homo sapiens GN=DDX21 PE=1 SV=5	10.6003	6	7	6	1	783	87.3	9.28
Q9HB71	Calcyclin-binding protein OS=Homo sapiens GN=CACYBP PE=1 SV=2	35.9649	6	7	6	1	228	26.2	8.25
Q5JWF2	Guanine nucleotide-binding protein G(s) subunit alpha isoforms XLas OS=Homo sapiens GN=GNAS PE=1 SV=2	8.19672	5	6	4	1	1037	111	5.03
P49748	Isoform 3 of Very long-chain specific acyl-CoA dehydrogenase, mitochondrial OS=Homo sapiens GN=ACADVL	11.0619	5	5	5	1	678	72.9	8.75
Q96I99	Succinate--CoA ligase [GDP-forming] subunit beta, mitochondrial OS=Homo sapiens GN=SUCLG2 PE=1 SV=2	18.287	7	7	7	1	432	46.5	6.39
O60664	Perilipin-3 OS=Homo sapiens GN=PLIN3 PE=1 SV=3	23.0415	4	4	4	1	434	47	5.44
P61026	Ras-related protein Rab-10 OS=Homo sapiens GN=RAB10 PE=1 SV=1	38	8	11	6	1	200	22.5	8.38
P43243	Matrin-3 OS=Homo sapiens GN=MATR3 PE=1 SV=2	9.20897	4	5	4	1	847	94.6	6.25
Q13838	Isoform 2 of Spliceosome RNA helicase DDX39B OS=Homo sapiens GN=DDX39B	22.5734	7	8	3	1	443	50.6	5.88
Q04837	Single-stranded DNA-binding protein, mitochondrial OS=Homo sapiens GN=SSBP1 PE=1 SV=1	55.4054	7	9	7	1	148	17.2	9.6
P62495	Eukaryotic peptide chain release factor subunit 1 OS=Homo sapiens GN=ETF1 PE=1 SV=3	19.222	5	5	5	1	437	49	5.71
P35268	60S ribosomal protein L22 OS=Homo sapiens GN=RPL22 PE=1 SV=2	50.7812	4	6	4	1	128	14.8	9.19
Q9Y2B0	Protein canopy homolog 2 OS=Homo sapiens GN=CNPY2 PE=1 SV=1	44.5055	6	8	6	1	182	20.6	4.92
P36542	ATP synthase subunit gamma, mitochondrial OS=Homo sapiens GN=ATP5C1 PE=1 SV=1	28.5235	8	9	8	1	298	33	9.22
Q01105	Protein SET OS=Homo sapiens GN=SET PE=1 SV=3	27.5862	5	6	5	1	290	33.5	4.32
O60716	Catenin delta-1 OS=Homo sapiens GN=CTNND1 PE=1 SV=1	11.0537	7	7	7	1	968	108.1	6.23
Q15067	Peroxisomal acyl-coenzyme A oxidase 1 OS=Homo sapiens GN=ACOX1 PE=1 SV=3	13.4848	5	6	5	1	660	74.4	8.16
P62820	Ras-related protein Rab-1A OS=Homo sapiens GN=RAB1A PE=1 SV=3	43.4146	9	11	2	1	205	22.7	6.21
Q9NR28	Diablo homolog, mitochondrial OS=Homo sapiens GN=DIABLO PE=1 SV=1	37.2385	6	7	6	1	239	27.1	5.9
P08574	Cytochrome c1, heme protein, mitochondrial OS=Homo sapiens GN=CYC1 PE=1 SV=3	30.7692	5	7	5	1	325	35.4	9
O00429	Isoform 6 of Dynamin-1-like protein OS=Homo sapiens GN=DNM1L	12.283	5	6	5	1	749	83.3	7.08
P29692	Isoform 2 of Elongation factor 1-delta OS=Homo sapiens GN=EEF1D	12.6739	6	6	6	1	647	71.4	6.42
P40227	T-complex protein 1 subunit zeta OS=Homo sapiens GN=CCT6A PE=1 SV=3	19.0207	7	7	7	1	531	58	6.68
P04179	Superoxide dismutase [Mn], mitochondrial OS=Homo sapiens GN=SOD2 PE=1 SV=2	47.2973	7	9	7	1	222	24.7	8.25
Q92841	Probable ATP-dependent RNA helicase DDX17 OS=Homo sapiens GN=DDX17 PE=1 SV=2	15.775	7	7	5	1	729	80.2	8.27
P54886	Delta-1-pyrroline-5-carboxylate synthase OS=Homo sapiens GN=ALDH18A1 PE=1 SV=2	10.566	7	7	7	1	795	87.2	7.12
Q9BRK5	45 kDa calcium-binding protein OS=Homo sapiens GN=SDF4 PE=1 SV=1	21.8232	5	6	5	1	362	41.8	4.86
P46776	60S ribosomal protein L27a OS=Homo sapiens GN=RPL27A PE=1 SV=2	28.3784	6	6	6	1	148	16.6	11
P62979	Ubiquitin-40S ribosomal protein S27a OS=Homo sapiens GN=RPS27A PE=1 SV=2	46.1538	7	10	7	1	156	18	9.64
Q96AY3	Peptidyl-prolyl cis-trans isomerase FKBP10 OS=Homo sapiens GN=FKBP10 PE=1 SV=1	16.4948	8	10	8	1	582	64.2	5.62
Q32P28	Isoform 3 of Prolyl 3-hydroxylase 1 OS=Homo sapiens GN=P3H1	12.3134	7	7	7	1	804	90.6	5.71
Q96GC9	Vacuole membrane protein 1 OS=Homo sapiens GN=VMP1 PE=1 SV=1	13.0542	3	4	3	1	406	46.2	6.95
Q13217	DnaJ homolog subfamily C member 3 OS=Homo sapiens GN=DNAJC3 PE=1 SV=1	15.873	3	3	3	1	504	57.5	6.15
P61163	Alpha-centractin OS=Homo sapiens GN=ACTR1A PE=1 SV=1	20.7447	4	4	4	1	376	42.6	6.64
P84095	Rho-related GTP-binding protein RhoG OS=Homo sapiens GN=RHOG PE=1 SV=1	35.6021	4	5	4	1	191	21.3	8.12
Q9UKY7	Protein CDV3 homolog OS=Homo sapiens GN=CDV3 PE=1 SV=1	48.8372	5	6	5	1	258	27.3	6.4
Q07955	Serine/arginine-rich splicing factor 1 OS=Homo sapiens GN=SRSF1 PE=1 SV=2	35.8871	7	8	7	1	248	27.7	10.36
O60701	UDP-glucose 6-dehydrogenase OS=Homo sapiens GN=UGDH PE=1 SV=1	13.7652	5	6	5	1	494	55	7.12
P52272	Heterogeneous nuclear ribonucleoprotein M OS=Homo sapiens GN=HNRNPM PE=1 SV=3	15.7534	10	10	10	1	730	77.5	8.7
P84098	60S ribosomal protein L19 OS=Homo sapiens GN=RPL19 PE=1 SV=1	29.0816	7	9	7	1	196	23.5	11.47
P43897	Elongation factor Ts, mitochondrial OS=Homo sapiens GN=TSFM PE=1 SV=2	22.7692	3	4	3	1	325	35.4	8.38
P51970	NADH dehydrogenase [ubiquinone] 1 alpha subcomplex subunit 8 OS=Homo sapiens GN=NDUFA8 PE=1 SV=3	37.2093	5	6	5	1	172	20.1	7.65
P50213	Isocitrate dehydrogenase [NAD] subunit alpha, mitochondrial OS=Homo sapiens GN=IDH3A PE=1 SV=1	21.0383	6	7	6	1	366	39.6	6.92
P46782	40S ribosomal protein S5 OS=Homo sapiens GN=RPS5 PE=1 SV=4	27.451	5	6	5	1	204	22.9	9.72
P61769	Beta-2-microglobulin OS=Homo sapiens GN=B2M PE=1 SV=1	35.2941	3	7	3	1	119	13.7	6.52
P27816	Microtubule-associated protein 4 OS=Homo sapiens GN=MAP4 PE=1 SV=3	11.0243	7	7	7	1	1152	120.9	5.43
P01111	GTPase NRas OS=Homo sapiens GN=NRAS PE=1 SV=1	33.3333	4	5	4	1	189	21.2	5.17
Q92499	ATP-dependent RNA helicase DDX1 OS=Homo sapiens GN=DDX1 PE=1 SV=2	6.48649	3	5	3	1	740	82.4	7.23
P62269	40S ribosomal protein S18 OS=Homo sapiens GN=RPS18 PE=1 SV=3	42.1053	7	8	7	1	152	17.7	10.99
O14818	Proteasome subunit alpha type-7 OS=Homo sapiens GN=PSMA7 PE=1 SV=1	26.2097	4	5	4	1	248	27.9	8.46
P26885	Peptidyl-prolyl cis-trans isomerase FKBP2 OS=Homo sapiens GN=FKBP2 PE=1 SV=2	45.0704	5	5	5	1	142	15.6	9.13
P50990	T-complex protein 1 subunit theta OS=Homo sapiens GN=CCT8 PE=1 SV=4	14.0511	7	7	7	1	548	59.6	5.6
Q02543	60S ribosomal protein L18a OS=Homo sapiens GN=RPL18A PE=1 SV=2	44.8864	9	11	9	1	176	20.7	10.71
P10619	Lysosomal protective protein OS=Homo sapiens GN=CTSA PE=1 SV=2	13.125	4	5	4	1	480	54.4	6.61
Q9Y5L4	Mitochondrial import inner membrane translocase subunit Tim13 OS=Homo sapiens GN=TIMM13 PE=1 SV=1	50.5263	4	5	4	1	95	10.5	8.18
Q00325	Phosphate carrier protein, mitochondrial OS=Homo sapiens GN=SLC25A3 PE=1 SV=2	20.7182	8	8	8	1	362	40.1	9.38
P62263	40S ribosomal protein S14 OS=Homo sapiens GN=RPS14 PE=1 SV=3	37.7483	5	5	5	1	151	16.3	10.05
O15427	Monocarboxylate transporter 4 OS=Homo sapiens GN=SLC16A3 PE=1 SV=1	13.7634	5	5	5	1	465	49.4	7.96
Q96AE4	Isoform 2 of Far upstream element-binding protein 1 OS=Homo sapiens GN=FUBP1	10.5666	6	6	5	1	653	68.6	7.31
P16402	Histone H1.3 OS=Homo sapiens GN=HIST1H1D PE=1 SV=2	19.457	6	7	5	1	221	22.3	11.02
Q92665	28S ribosomal protein S31, mitochondrial OS=Homo sapiens GN=MRPS31 PE=1 SV=3	11.3924	2	3	2	1	395	45.3	9.29
Q7Z7H5	Transmembrane emp24 domain-containing protein 4 OS=Homo sapiens GN=TMED4 PE=1 SV=1	23.7885	5	7	4	1	227	25.9	8.28
Q9BVK6	Transmembrane emp24 domain-containing protein 9 OS=Homo sapiens GN=TMED9 PE=1 SV=2	20	4	6	3	1	235	27.3	8.02
P30049	ATP synthase subunit delta, mitochondrial OS=Homo sapiens GN=ATP5D PE=1 SV=2	41.0714	4	6	4	1	168	17.5	5.49
P30519	Heme oxygenase 2 OS=Homo sapiens GN=HMOX2 PE=1 SV=2	21.2025	4	4	4	1	316	36	5.41
P13995	Bifunctional methylenetetrahydrofolate dehydrogenase/cyclohydrolase, mitochondrial OS=Homo sapiens GN=MTHFD2 PE=1 SV=2	16.5714	3	3	3	1	350	37.9	8.73
Q9P0L0	Isoform 2 of Vesicle-associated membrane protein-associated protein A OS=Homo sapiens GN=VAPA	26.1905	6	8	6	1	294	32.6	8.91
Q9HCC0	Methylcrotonoyl-CoA carboxylase beta chain, mitochondrial OS=Homo sapiens GN=MCCC2 PE=1 SV=1	13.1439	5	5	5	1	563	61.3	7.68
Q92544	Transmembrane 9 superfamily member 4 OS=Homo sapiens GN=TM9SF4 PE=1 SV=2	9.50156	5	6	5	1	642	74.5	6.54
P60953	Cell division control protein 42 homolog OS=Homo sapiens GN=CDC42 PE=1 SV=2	41.3613	5	6	5	1	191	21.2	6.55
Q16629	Serine/arginine-rich splicing factor 7 OS=Homo sapiens GN=SRSF7 PE=1 SV=1	24.7899	6	7	5	1	238	27.4	11.82
Q9NUQ6	Isoform 3 of SPATS2-like protein OS=Homo sapiens GN=SPATS2L	10.5442	5	5	5	1	588	65.1	9.66
P10606	Cytochrome c oxidase subunit 5B, mitochondrial OS=Homo sapiens GN=COX5B PE=1 SV=2	46.5116	6	7	6	1	129	13.7	8.81
P62829	60S ribosomal protein L23 OS=Homo sapiens GN=RPL23 PE=1 SV=1	43.5714	5	6	5	1	140	14.9	10.51
P26373	60S ribosomal protein L13 OS=Homo sapiens GN=RPL13 PE=1 SV=4	38.3886	10	10	10	1	211	24.2	11.65
P43304	Glycerol-3-phosphate dehydrogenase, mitochondrial OS=Homo sapiens GN=GPD2 PE=1 SV=3	10.729	4	4	4	1	727	80.8	7.69
P50914	60S ribosomal protein L14 OS=Homo sapiens GN=RPL14 PE=1 SV=4	24.6512	5	7	5	1	215	23.4	10.93
Q15836	Vesicle-associated membrane protein 3 OS=Homo sapiens GN=VAMP3 PE=1 SV=3	40	3	5	3	1	100	11.3	8.79
P23588	Eukaryotic translation initiation factor 4B OS=Homo sapiens GN=EIF4B PE=1 SV=2	17.3486	6	6	6	1	611	69.1	5.73
Q9NS69	Mitochondrial import receptor subunit TOM22 homolog OS=Homo sapiens GN=TOMM22 PE=1 SV=3	51.4085	5	5	5	1	142	15.5	4.34
P46783	40S ribosomal protein S10 OS=Homo sapiens GN=RPS10 PE=1 SV=1	39.3939	6	7	6	1	165	18.9	10.15
P61353	60S ribosomal protein L27 OS=Homo sapiens GN=RPL27 PE=1 SV=2	36.7647	5	6	5	1	136	15.8	10.56
P46459	Vesicle-fusing ATPase OS=Homo sapiens GN=NSF PE=1 SV=3	12.9032	7	7	7	1	744	82.5	6.95
P62136	Isoform 2 of Serine/threonine-protein phosphatase PP1-alpha catalytic subunit OS=Homo sapiens GN=PPP1CA	16.4223	4	6	4	1	341	38.6	6.62
Q9H4A6	Golgi phosphoprotein 3 OS=Homo sapiens GN=GOLPH3 PE=1 SV=1	13.4228	2	4	2	1	298	33.8	6.44
Q9Y230	RuvB-like 2 OS=Homo sapiens GN=RUVBL2 PE=1 SV=3	15.7667	6	6	6	1	463	51.1	5.64
O94973	Isoform 2 of AP-2 complex subunit alpha-2 OS=Homo sapiens GN=AP2A2	10	4	4	4	1	940	104	6.86
Q13263	Transcription intermediary factor 1-beta OS=Homo sapiens GN=TRIM28 PE=1 SV=5	11.8563	4	4	4	1	835	88.5	5.77
P31947	14-3-3 protein sigma OS=Homo sapiens GN=SFN PE=1 SV=1	22.9839	5	7	1	1	248	27.8	4.74
Q10567	AP-1 complex subunit beta-1 OS=Homo sapiens GN=AP1B1 PE=1 SV=2	8.32455	4	4	2	1	949	104.6	5.06
Q99729	Isoform 3 of Heterogeneous nuclear ribonucleoprotein A/B OS=Homo sapiens GN=HNRNPAB	22.1053	5	6	4	1	285	30.6	7.91
O14561	Acyl carrier protein, mitochondrial OS=Homo sapiens GN=NDUFAB1 PE=1 SV=3	25	5	7	5	1	156	17.4	4.93
Q9BYD6	39S ribosomal protein L1, mitochondrial OS=Homo sapiens GN=MRPL1 PE=1 SV=2	17.5385	3	4	3	1	325	36.9	8.78
P09874	Poly [ADP-ribose] polymerase 1 OS=Homo sapiens GN=PARP1 PE=1 SV=4	7.88955	3	4	3	1	1014	113	8.88
Q9UBM7	7-dehydrocholesterol reductase OS=Homo sapiens GN=DHCR7 PE=1 SV=1	11.5789	4	4	4	1	475	54.5	8.7
Q6YN16	Hydroxysteroid dehydrogenase-like protein 2 OS=Homo sapiens GN=HSDL2 PE=1 SV=1	13.6364	4	5	4	1	418	45.4	7.99
P60891	Ribose-phosphate pyrophosphokinase 1 OS=Homo sapiens GN=PRPS1 PE=1 SV=2	24.5283	7	9	7	1	318	34.8	6.98
P62826	GTP-binding nuclear protein Ran OS=Homo sapiens GN=RAN PE=1 SV=3	27.3148	5	5	5	1	216	24.4	7.49
P14923	Junction plakoglobin OS=Homo sapiens GN=JUP PE=1 SV=3	7.78523	3	3	3	1	745	81.7	6.14
P46779	60S ribosomal protein L28 OS=Homo sapiens GN=RPL28 PE=1 SV=3	34.3066	6	8	6	1	137	15.7	12.02
P13073	Cytochrome c oxidase subunit 4 isoform 1, mitochondrial OS=Homo sapiens GN=COX4I1 PE=1 SV=1	28.9941	4	5	4	1	169	19.6	9.51
P15144	Aminopeptidase N OS=Homo sapiens GN=ANPEP PE=1 SV=4	6.72182	3	5	3	1	967	109.5	5.48
Q13148	TAR DNA-binding protein 43 OS=Homo sapiens GN=TARDBP PE=1 SV=1	13.0435	3	3	3	1	414	44.7	6.19
P19367	Isoform 3 of Hexokinase-1 OS=Homo sapiens GN=HK1	5.53746	4	4	4	1	921	102.7	6.76
Q14978	Isoform Beta of Nucleolar and coiled-body phosphoprotein 1 OS=Homo sapiens GN=NOLC1	10.1551	5	8	5	1	709	74.7	9.47
P06396	Gelsolin OS=Homo sapiens GN=GSN PE=1 SV=1	6.77749	4	5	4	1	782	85.6	6.28
P05386	60S acidic ribosomal protein P1 OS=Homo sapiens GN=RPLP1 PE=1 SV=1	42.9825	2	5	2	1	114	11.5	4.32
P62888	60S ribosomal protein L30 OS=Homo sapiens GN=RPL30 PE=1 SV=2	47.8261	4	5	4	1	115	12.8	9.63
Q86YZ3	Hornerin OS=Homo sapiens GN=HRNR PE=1 SV=2	4.45614	3	3	3	1	2850	282.2	10.04
P25398	40S ribosomal protein S12 OS=Homo sapiens GN=RPS12 PE=1 SV=3	53.0303	6	6	6	1	132	14.5	7.21
P41250	Glycine--tRNA ligase OS=Homo sapiens GN=GARS PE=1 SV=3	8.38972	4	4	4	1	739	83.1	7.03
P07737	Profilin-1 OS=Homo sapiens GN=PFN1 PE=1 SV=2	46.4286	5	6	5	1	140	15	8.27
P16401	Histone H1.5 OS=Homo sapiens GN=HIST1H1B PE=1 SV=3	18.5841	5	6	4	1	226	22.6	10.92
O14579	Coatomer subunit epsilon OS=Homo sapiens GN=COPE PE=1 SV=3	26.2987	4	5	4	1	308	34.5	5.12
O96013	Serine/threonine-protein kinase PAK 4 OS=Homo sapiens GN=PAK4 PE=1 SV=1	6.59898	2	3	2	1	591	64	9.73
P35606	Coatomer subunit beta' OS=Homo sapiens GN=COPB2 PE=1 SV=2	7.28477	6	8	6	1	906	102.4	5.27
P02768	Serum albumin OS=Homo sapiens GN=ALB PE=1 SV=2	8.21018	5	6	5	1	609	69.3	6.28
Q13423	NAD(P) transhydrogenase, mitochondrial OS=Homo sapiens GN=NNT PE=1 SV=3	6.07735	4	4	4	1	1086	113.8	8.09
P62280	40S ribosomal protein S11 OS=Homo sapiens GN=RPS11 PE=1 SV=3	43.6709	7	9	7	1	158	18.4	10.3
Q03135	Caveolin-1 OS=Homo sapiens GN=CAV1 PE=1 SV=4	31.4607	5	7	5	1	178	20.5	6.02
P61019	Ras-related protein Rab-2A OS=Homo sapiens GN=RAB2A PE=1 SV=1	17.9245	3	4	3	1	212	23.5	6.54
P07910	Heterogeneous nuclear ribonucleoproteins C1/C2 OS=Homo sapiens GN=HNRNPC PE=1 SV=4	20.2614	6	6	6	1	306	33.7	5.08
P00387	Isoform 3 of NADH-cytochrome b5 reductase 3 OS=Homo sapiens GN=CYB5R3	29.3413	6	7	6	1	334	38.2	6.9
Q13151	Heterogeneous nuclear ribonucleoprotein A0 OS=Homo sapiens GN=HNRNPA0 PE=1 SV=1	18.0328	4	5	3	1	305	30.8	9.29
Q9C002	Normal mucosa of esophagus-specific gene 1 protein OS=Homo sapiens GN=NMES1 PE=2 SV=1	50.6024	4	4	4	1	83	9.6	9.47
Q13283	Ras GTPase-activating protein-binding protein 1 OS=Homo sapiens GN=G3BP1 PE=1 SV=1	12.4464	4	4	4	1	466	52.1	5.52
P48960	CD97 antigen OS=Homo sapiens GN=CD97 PE=1 SV=4	8.26347	4	4	4	1	835	91.8	6.87
P13746	Isoform 2 of HLA class I histocompatibility antigen, A-11 alpha chain OS=Homo sapiens GN=HLA-A	17.2507	4	4	1	1	371	41.4	6.15
Q15185	Prostaglandin E synthase 3 OS=Homo sapiens GN=PTGES3 PE=1 SV=1	36.875	5	5	5	1	160	18.7	4.54
P83731	60S ribosomal protein L24 OS=Homo sapiens GN=RPL24 PE=1 SV=1	24.2038	4	5	4	1	157	17.8	11.25
O96000	NADH dehydrogenase [ubiquinone] 1 beta subcomplex subunit 10 OS=Homo sapiens GN=NDUFB10 PE=1 SV=3	33.7209	5	5	5	1	172	20.8	8.48
A1L0T0	Acetolactate synthase-like protein OS=Homo sapiens GN=ILVBL PE=1 SV=2	8.22785	3	4	3	1	632	67.8	8.15
P52943	Isoform 2 of Cysteine-rich protein 2 OS=Homo sapiens GN=CRIP2	23.7589	3	5	3	1	282	30.2	8.22
Q6PIU2	Isoform 2 of Neutral cholesterol ester hydrolase 1 OS=Homo sapiens GN=NCEH1	17.5481	3	3	3	1	416	46.6	6.62
Q15006	ER membrane protein complex subunit 2 OS=Homo sapiens GN=EMC2 PE=1 SV=1	14.1414	3	4	3	1	297	34.8	6.57
P26368	Splicing factor U2AF 65 kDa subunit OS=Homo sapiens GN=U2AF2 PE=1 SV=4	15.3684	4	5	4	1	475	53.5	9.09
Q04917	14-3-3 protein eta OS=Homo sapiens GN=YWHAH PE=1 SV=4	19.5122	5	7	1	1	246	28.2	4.84
P62249	40S ribosomal protein S16 OS=Homo sapiens GN=RPS16 PE=1 SV=2	49.3151	8	11	8	1	146	16.4	10.21
Q9UBS4	DnaJ homolog subfamily B member 11 OS=Homo sapiens GN=DNAJB11 PE=1 SV=1	18.7151	4	5	4	1	358	40.5	6.18
P54920	Alpha-soluble NSF attachment protein OS=Homo sapiens GN=NAPA PE=1 SV=3	23.7288	5	6	5	1	295	33.2	5.36
P26196	Probable ATP-dependent RNA helicase DDX6 OS=Homo sapiens GN=DDX6 PE=1 SV=2	11.1801	3	3	3	1	483	54.4	8.66
P49257	Protein ERGIC-53 OS=Homo sapiens GN=LMAN1 PE=1 SV=2	14.902	6	6	6	1	510	57.5	6.77
Q7L1Q6	Isoform 3 of Basic leucine zipper and W2 domain-containing protein 1 OS=Homo sapiens GN=BZW1	12.4169	3	4	3	1	451	51.2	6.62
Q8TAT6	Isoform 2 of Nuclear protein localization protein 4 homolog OS=Homo sapiens GN=NPLOC4	9.07618	3	4	3	1	617	69.4	6.68
P62266	40S ribosomal protein S23 OS=Homo sapiens GN=RPS23 PE=1 SV=3	46.8531	6	6	6	1	143	15.8	10.49
Q96BM9	ADP-ribosylation factor-like protein 8A OS=Homo sapiens GN=ARL8A PE=1 SV=1	37.0968	5	6	5	1	186	21.4	7.77
O43837	Isocitrate dehydrogenase [NAD] subunit beta, mitochondrial OS=Homo sapiens GN=IDH3B PE=1 SV=2	19.7403	5	6	5	1	385	42.2	8.46
P08754	Guanine nucleotide-binding protein G(k) subunit alpha OS=Homo sapiens GN=GNAI3 PE=1 SV=3	18.9266	4	4	2	1	354	40.5	5.69
Q01518	Adenylyl cyclase-associated protein 1 OS=Homo sapiens GN=CAP1 PE=1 SV=5	10.9474	3	4	3	1	475	51.9	8.06
Q9Y3E5	Peptidyl-tRNA hydrolase 2, mitochondrial OS=Homo sapiens GN=PTRH2 PE=1 SV=1	31.8436	3	3	3	1	179	19.2	8.73
P14927	Cytochrome b-c1 complex subunit 7 OS=Homo sapiens GN=UQCRB PE=1 SV=2	42.3423	5	7	5	1	111	13.5	8.78
Q99595	Mitochondrial import inner membrane translocase subunit Tim17-A OS=Homo sapiens GN=TIMM17A PE=1 SV=1	37.4269	3	3	3	1	171	18	7.87
Q07666	KH domain-containing, RNA-binding, signal transduction-associated protein 1 OS=Homo sapiens GN=KHDRBS1 PE=1 SV=1	11.2867	4	4	4	1	443	48.2	8.66
P28331	Isoform 2 of NADH-ubiquinone oxidoreductase 75 kDa subunit, mitochondrial OS=Homo sapiens GN=NDUFS1	6.20783	3	3	3	1	741	80.9	6.64
P61421	V-type proton ATPase subunit d 1 OS=Homo sapiens GN=ATP6V0D1 PE=1 SV=1	14.5299	3	3	3	1	351	40.3	5
P09496	Isoform Non-brain of Clathrin light chain A OS=Homo sapiens GN=CLTA	27.9817	6	6	6	1	218	23.6	4.53
P62753	40S ribosomal protein S6 OS=Homo sapiens GN=RPS6 PE=1 SV=1	23.6948	6	7	6	1	249	28.7	10.84
P04908	Histone H2A type 1-B/E OS=Homo sapiens GN=HIST1H2AB PE=1 SV=2	21.5385	2	4	2	1	130	14.1	11.05
P21964	Catechol O-methyltransferase OS=Homo sapiens GN=COMT PE=1 SV=2	21.7712	3	3	3	1	271	30	5.47
Q9BUR5	MICOS complex subunit MIC26 OS=Homo sapiens GN=APOO PE=1 SV=1	28.2828	3	3	3	1	198	22.3	9.13
Q86V81	THO complex subunit 4 OS=Homo sapiens GN=ALYREF PE=1 SV=3	20.6226	3	3	3	1	257	26.9	11.15
P61204	ADP-ribosylation factor 3 OS=Homo sapiens GN=ARF3 PE=1 SV=2	25.4144	4	4	3	1	181	20.6	7.43
Q9Y6H1	Coiled-coil-helix-coiled-coil-helix domain-containing protein 2 OS=Homo sapiens GN=CHCHD2 PE=1 SV=1	33.7748	3	3	3	1	151	15.5	9.22
Q15637	Isoform 5 of Splicing factor 1 OS=Homo sapiens GN=SF1	6.53789	3	4	3	1	673	71.7	9.58
P62277	40S ribosomal protein S13 OS=Homo sapiens GN=RPS13 PE=1 SV=2	31.1258	4	6	4	1	151	17.2	10.54
P53701	Cytochrome c-type heme lyase OS=Homo sapiens GN=HCCS PE=1 SV=1	18.2836	3	3	3	1	268	30.6	6.68
P07919	Cytochrome b-c1 complex subunit 6, mitochondrial OS=Homo sapiens GN=UQCRH PE=1 SV=2	29.6703	2	4	2	1	91	10.7	4.44
Q9H910	Isoform 3 of Hematological and neurological expressed 1-like protein OS=Homo sapiens GN=HN1L	36.2385	6	6	6	1	218	23	9.57
O00767	Acyl-CoA desaturase OS=Homo sapiens GN=SCD PE=1 SV=2	26.7409	5	5	5	1	359	41.5	9
P31949	Protein S100-A11 OS=Homo sapiens GN=S100A11 PE=1 SV=2	49.5238	5	6	5	1	105	11.7	7.12
Q96RP9	Isoform 2 of Elongation factor G, mitochondrial OS=Homo sapiens GN=GFM1	7.4026	4	6	4	1	770	85.8	7.18
O14980	Exportin-1 OS=Homo sapiens GN=XPO1 PE=1 SV=1	6.81606	3	3	3	1	1071	123.3	6.06
Q96C36	Pyrroline-5-carboxylate reductase 2 OS=Homo sapiens GN=PYCR2 PE=1 SV=1	18.125	4	4	3	1	320	33.6	7.77
Q15056	Eukaryotic translation initiation factor 4H OS=Homo sapiens GN=EIF4H PE=1 SV=5	33.0645	5	5	5	1	248	27.4	7.23
Q9BQE5	Apolipoprotein L2 OS=Homo sapiens GN=APOL2 PE=1 SV=1	12.7596	2	3	2	1	337	37.1	6.74
Q07020	60S ribosomal protein L18 OS=Homo sapiens GN=RPL18 PE=1 SV=2	28.7234	5	7	5	1	188	21.6	11.72
Q96CS3	FAS-associated factor 2 OS=Homo sapiens GN=FAF2 PE=1 SV=2	11.0112	4	4	4	1	445	52.6	5.62
P39687	Acidic leucine-rich nuclear phosphoprotein 32 family member A OS=Homo sapiens GN=ANP32A PE=1 SV=1	13.6546	3	4	3	1	249	28.6	4.09
Q14696	LDLR chaperone MESD OS=Homo sapiens GN=MESDC2 PE=1 SV=2	12.8205	2	3	2	1	234	26.1	7.78
Q9BX68	Histidine triad nucleotide-binding protein 2, mitochondrial OS=Homo sapiens GN=HINT2 PE=1 SV=1	36.8098	4	5	4	1	163	17.2	9.16
Q96A00	Protein phosphatase 1 regulatory subunit 14A OS=Homo sapiens GN=PPP1R14A PE=1 SV=1	21.7687	2	4	2	1	147	16.7	9.38
P18669	Phosphoglycerate mutase 1 OS=Homo sapiens GN=PGAM1 PE=1 SV=2	29.9213	5	7	5	1	254	28.8	7.18
Q14974	Importin subunit beta-1 OS=Homo sapiens GN=KPNB1 PE=1 SV=2	4.90868	3	4	3	1	876	97.1	4.78
P31948	Isoform 2 of Stress-induced-phosphoprotein 1 OS=Homo sapiens GN=STIP1	7.9661	4	4	4	1	590	68	7.74
P50416	Carnitine O-palmitoyltransferase 1, liver isoform OS=Homo sapiens GN=CPT1A PE=1 SV=2	9.57309	6	6	6	1	773	88.3	8.65
P48444	Coatomer subunit delta OS=Homo sapiens GN=ARCN1 PE=1 SV=1	8.41487	4	4	4	1	511	57.2	6.21
P84157	Matrix-remodeling-associated protein 7 OS=Homo sapiens GN=MXRA7 PE=1 SV=1	33.3333	4	4	4	1	204	21.5	4.26
P28072	Proteasome subunit beta type-6 OS=Homo sapiens GN=PSMB6 PE=1 SV=4	25.1046	3	4	3	1	239	25.3	4.92
P18621	Isoform 3 of 60S ribosomal protein L17 OS=Homo sapiens GN=RPL17	27.193	5	7	5	1	228	26.4	10.1
P62841	40S ribosomal protein S15 OS=Homo sapiens GN=RPS15 PE=1 SV=2	17.2414	2	4	2	1	145	17	10.39
P24534	Elongation factor 1-beta OS=Homo sapiens GN=EEF1B2 PE=1 SV=3	31.1111	4	4	4	1	225	24.7	4.67
P49821	NADH dehydrogenase [ubiquinone] flavoprotein 1, mitochondrial OS=Homo sapiens GN=NDUFV1 PE=1 SV=4	18.9655	5	5	5	1	464	50.8	8.21
P22392	Isoform 3 of Nucleoside diphosphate kinase B OS=Homo sapiens GN=NME2	35.5805	6	6	3	1	267	30.1	8.92
O60884	DnaJ homolog subfamily A member 2 OS=Homo sapiens GN=DNAJA2 PE=1 SV=1	17.233	3	3	3	1	412	45.7	6.48
Q16698	2,4-dienoyl-CoA reductase, mitochondrial OS=Homo sapiens GN=DECR1 PE=1 SV=1	15.8209	4	4	4	1	335	36	9.28
P61221	ATP-binding cassette sub-family E member 1 OS=Homo sapiens GN=ABCE1 PE=1 SV=1	8.51419	2	3	2	1	599	67.3	8.34
Q6YHK3	CD109 antigen OS=Homo sapiens GN=CD109 PE=1 SV=2	3.52941	3	3	3	1	1445	161.6	5.85
Q14258	E3 ubiquitin/ISG15 ligase TRIM25 OS=Homo sapiens GN=TRIM25 PE=1 SV=2	2.85714	1	3	1	1	630	70.9	8.09
Q9Y3U8	60S ribosomal protein L36 OS=Homo sapiens GN=RPL36 PE=1 SV=3	34.2857	6	7	6	1	105	12.2	11.59
P53621	Isoform 2 of Coatomer subunit alpha OS=Homo sapiens GN=COPA	4.05515	3	4	3	1	1233	139.2	7.59
P29992	Guanine nucleotide-binding protein subunit alpha-11 OS=Homo sapiens GN=GNA11 PE=1 SV=2	10.3064	2	4	2	1	359	42.1	5.69
O43615	Mitochondrial import inner membrane translocase subunit TIM44 OS=Homo sapiens GN=TIMM44 PE=1 SV=2	11.5044	4	4	4	1	452	51.3	8.32
Q96A26	Protein FAM162A OS=Homo sapiens GN=FAM162A PE=1 SV=2	37.013	5	5	5	1	154	17.3	9.77
P00403	Cytochrome c oxidase subunit 2 OS=Homo sapiens GN=MT-CO2 PE=1 SV=1	23.348	4	4	4	1	227	25.5	4.82
P62899	60S ribosomal protein L31 OS=Homo sapiens GN=RPL31 PE=1 SV=1	38.4	5	6	5	1	125	14.5	10.54
Q9UL46	Proteasome activator complex subunit 2 OS=Homo sapiens GN=PSME2 PE=1 SV=4	21.3389	3	4	3	1	239	27.4	5.73
O95299	NADH dehydrogenase [ubiquinone] 1 alpha subcomplex subunit 10, mitochondrial OS=Homo sapiens GN=NDUFA10 PE=1 SV=1	18.8732	5	5	5	1	355	40.7	8.48
Q969X5	Endoplasmic reticulum-Golgi intermediate compartment protein 1 OS=Homo sapiens GN=ERGIC1 PE=1 SV=1	17.5862	4	4	4	1	290	32.6	7.06
O75477	Erlin-1 OS=Homo sapiens GN=ERLIN1 PE=1 SV=1	18.2081	4	4	4	1	346	38.9	7.87
P41091	Eukaryotic translation initiation factor 2 subunit 3 OS=Homo sapiens GN=EIF2S3 PE=1 SV=3	11.6525	3	3	3	1	472	51.1	8.4
P56537	Eukaryotic translation initiation factor 6 OS=Homo sapiens GN=EIF6 PE=1 SV=1	27.7551	3	3	3	1	245	26.6	4.68
P23246	Splicing factor, proline- and glutamine-rich OS=Homo sapiens GN=SFPQ PE=1 SV=2	5.94059	3	5	2	1	707	76.1	9.44
P98179	RNA-binding protein 3 OS=Homo sapiens GN=RBM3 PE=1 SV=1	41.4013	3	3	3	1	157	17.2	8.91
P15531	Isoform 2 of Nucleoside diphosphate kinase A OS=Homo sapiens GN=NME1	27.1186	4	4	1	1	177	19.6	5.58
Q8TCT9	Isoform 2 of Minor histocompatibility antigen H13 OS=Homo sapiens GN=HM13	10.7981	3	4	3	1	426	46.8	7.23
Q12907	Vesicular integral-membrane protein VIP36 OS=Homo sapiens GN=LMAN2 PE=1 SV=1	11.5169	3	3	3	1	356	40.2	6.95
O60888	Isoform A of Protein CutA OS=Homo sapiens GN=CUTA	20.7071	2	3	2	1	198	20.9	5.48
Q16836	Isoform 2 of Hydroxyacyl-coenzyme A dehydrogenase, mitochondrial OS=Homo sapiens GN=HADH	14.1026	5	6	5	1	390	42.1	9.26
Q8IVL5	Prolyl 3-hydroxylase 2 OS=Homo sapiens GN=P3H2 PE=1 SV=1	7.9096	2	3	2	1	708	80.9	5.71
P62195	26S protease regulatory subunit 8 OS=Homo sapiens GN=PSMC5 PE=1 SV=1	14.532	5	5	4	1	406	45.6	7.55
P20810	Isoform 6 of Calpastatin OS=Homo sapiens GN=CAST	5.30973	2	2	2	1	791	84.9	5.36
P55327	Isoform 3 of Tumor protein D52 OS=Homo sapiens GN=TPD52	29.8387	3	3	3	1	248	26.4	6.34
Q13247	Serine/arginine-rich splicing factor 6 OS=Homo sapiens GN=SRSF6 PE=1 SV=2	10.1744	4	5	4	1	344	39.6	11.43
P40429	60S ribosomal protein L13a OS=Homo sapiens GN=RPL13A PE=1 SV=2	21.6749	6	7	6	1	203	23.6	10.93
P31150	Rab GDP dissociation inhibitor alpha OS=Homo sapiens GN=GDI1 PE=1 SV=2	8.50112	2	2	2	1	447	50.6	5.14
Q16795	NADH dehydrogenase [ubiquinone] 1 alpha subcomplex subunit 9, mitochondrial OS=Homo sapiens GN=NDUFA9 PE=1 SV=2	11.4058	3	3	3	1	377	42.5	9.8
Q14318	Isoform 2 of Peptidyl-prolyl cis-trans isomerase FKBP8 OS=Homo sapiens GN=FKBP8	14.2857	3	3	3	1	413	44.6	4.84
Q9NZ45	CDGSH iron-sulfur domain-containing protein 1 OS=Homo sapiens GN=CISD1 PE=1 SV=1	36.1111	3	3	3	1	108	12.2	9.09
Q9UBI6	Guanine nucleotide-binding protein G(I)/G(S)/G(O) subunit gamma-12 OS=Homo sapiens GN=GNG12 PE=1 SV=3	66.6667	4	4	4	1	72	8	8.97
Q7Z7H8	Isoform 2 of 39S ribosomal protein L10, mitochondrial OS=Homo sapiens GN=MRPL10	7.01107	1	3	1	1	271	30.3	9.25
P13861	cAMP-dependent protein kinase type II-alpha regulatory subunit OS=Homo sapiens GN=PRKAR2A PE=1 SV=2	6.93069	2	3	2	1	404	45.5	5.07
P47897	Glutamine--tRNA ligase OS=Homo sapiens GN=QARS PE=1 SV=1	8.25806	2	3	2	1	775	87.7	7.15
O00116	Alkyldihydroxyacetonephosphate synthase, peroxisomal OS=Homo sapiens GN=AGPS PE=1 SV=1	6.99088	3	3	3	1	658	72.9	7.34
Q641Q2	WASH complex subunit FAM21A OS=Homo sapiens GN=FAM21A PE=1 SV=3	4.47427	2	2	2	1	1341	147.1	4.81
P30038	Delta-1-pyrroline-5-carboxylate dehydrogenase, mitochondrial OS=Homo sapiens GN=ALDH4A1 PE=1 SV=3	8.88099	3	3	3	1	563	61.7	8.07
O60493	Sorting nexin-3 OS=Homo sapiens GN=SNX3 PE=1 SV=3	32.716	3	4	3	1	162	18.8	8.66
Q12849	G-rich sequence factor 1 OS=Homo sapiens GN=GRSF1 PE=1 SV=3	13.3333	3	4	3	1	480	53.1	6.19
O75396	Vesicle-trafficking protein SEC22b OS=Homo sapiens GN=SEC22B PE=1 SV=4	20	4	4	4	1	215	24.6	6.92
Q8NBJ7	Isoform 3 of Sulfatase-modifying factor 2 OS=Homo sapiens GN=SUMF2	14.1593	4	4	4	1	339	37.4	9.36
O00299	Chloride intracellular channel protein 1 OS=Homo sapiens GN=CLIC1 PE=1 SV=4	19.917	4	5	4	1	241	26.9	5.17
P51571	Translocon-associated protein subunit delta OS=Homo sapiens GN=SSR4 PE=1 SV=1	23.1214	3	4	3	1	173	19	6.15
P80303	Nucleobindin-2 OS=Homo sapiens GN=NUCB2 PE=1 SV=2	11.6667	4	4	3	1	420	50.2	5.12
O94925	Isoform 3 of Glutaminase kidney isoform, mitochondrial OS=Homo sapiens GN=GLS	11.5385	4	4	4	1	598	65.4	7.88
Q969H8	Myeloid-derived growth factor OS=Homo sapiens GN=MYDGF PE=1 SV=1	20.2312	3	4	3	1	173	18.8	6.68
Q08257	Quinone oxidoreductase OS=Homo sapiens GN=CRYZ PE=1 SV=1	17.0213	3	3	3	1	329	35.2	8.44
P61254	60S ribosomal protein L26 OS=Homo sapiens GN=RPL26 PE=1 SV=1	22.7586	5	6	2	1	145	17.2	10.55
Q9Y277	Isoform 2 of Voltage-dependent anion-selective channel protein 3 OS=Homo sapiens GN=VDAC3	11.9718	3	4	2	1	284	30.8	8.66
Q15388	Mitochondrial import receptor subunit TOM20 homolog OS=Homo sapiens GN=TOMM20 PE=1 SV=1	22.7586	2	2	2	1	145	16.3	8.6
P55209	Nucleosome assembly protein 1-like 1 OS=Homo sapiens GN=NAP1L1 PE=1 SV=1	14.3223	4	5	3	1	391	45.3	4.46
P42765	3-ketoacyl-CoA thiolase, mitochondrial OS=Homo sapiens GN=ACAA2 PE=1 SV=2	16.8766	3	3	3	1	397	41.9	8.09
P46781	40S ribosomal protein S9 OS=Homo sapiens GN=RPS9 PE=1 SV=3	32.4742	7	7	7	1	194	22.6	10.65
P61513	60S ribosomal protein L37a OS=Homo sapiens GN=RPL37A PE=1 SV=2	39.1304	4	5	4	1	92	10.3	10.43
P42766	60S ribosomal protein L35 OS=Homo sapiens GN=RPL35 PE=1 SV=2	26.8293	3	5	3	1	123	14.5	11.05
P19404	NADH dehydrogenase [ubiquinone] flavoprotein 2, mitochondrial OS=Homo sapiens GN=NDUFV2 PE=1 SV=2	17.2691	3	3	3	1	249	27.4	8.06
O75964	ATP synthase subunit g, mitochondrial OS=Homo sapiens GN=ATP5L PE=1 SV=3	33.9806	3	3	3	1	103	11.4	9.64
Q6NUK1	Calcium-binding mitochondrial carrier protein SCaMC-1 OS=Homo sapiens GN=SLC25A24 PE=1 SV=2	14.8847	5	5	5	1	477	53.3	6.33
P13987	CD59 glycoprotein OS=Homo sapiens GN=CD59 PE=1 SV=1	25	3	4	3	1	128	14.2	6.48
Q9BYD3	39S ribosomal protein L4, mitochondrial OS=Homo sapiens GN=MRPL4 PE=1 SV=1	14.1479	2	2	2	1	311	34.9	9.72
Q68CZ2	Tensin-3 OS=Homo sapiens GN=TNS3 PE=1 SV=2	4.35986	2	2	2	1	1445	155.2	6.81
P34932	Heat shock 70 kDa protein 4 OS=Homo sapiens GN=HSPA4 PE=1 SV=4	5.59524	3	4	3	1	840	94.3	5.19
Q5JRX3	Isoform 2 of Presequence protease, mitochondrial OS=Homo sapiens GN=PITRM1	4.62428	2	3	2	1	1038	117.4	6.92
Q8NF37	Lysophosphatidylcholine acyltransferase 1 OS=Homo sapiens GN=LPCAT1 PE=1 SV=2	7.1161	2	2	2	1	534	59.1	6.02
O43390	Isoform 2 of Heterogeneous nuclear ribonucleoprotein R OS=Homo sapiens GN=HNRNPR	6.44654	4	5	1	1	636	71.2	8.13
Q13084	39S ribosomal protein L28, mitochondrial OS=Homo sapiens GN=MRPL28 PE=1 SV=4	18.3594	2	2	2	1	256	30.1	8.29
Q02809	Isoform 2 of Procollagen-lysine,2-oxoglutarate 5-dioxygenase 1 OS=Homo sapiens GN=PLOD1	5.68475	4	4	4	1	774	88.2	7.11
Q9H936	Mitochondrial glutamate carrier 1 OS=Homo sapiens GN=SLC25A22 PE=1 SV=1	15.1703	3	3	3	1	323	34.4	9.29
P43686	26S protease regulatory subunit 6B OS=Homo sapiens GN=PSMC4 PE=1 SV=2	14.3541	3	3	2	1	418	47.3	5.21
P62851	40S ribosomal protein S25 OS=Homo sapiens GN=RPS25 PE=1 SV=1	24	4	4	4	1	125	13.7	10.11
Q9Y2R5	28S ribosomal protein S17, mitochondrial OS=Homo sapiens GN=MRPS17 PE=1 SV=1	37.6923	2	2	2	1	130	14.5	9.85
Q9BXW7	Cat eye syndrome critical region protein 5 OS=Homo sapiens GN=CECR5 PE=1 SV=1	11.1111	3	3	3	1	423	46.3	8.13
P62314	Small nuclear ribonucleoprotein Sm D1 OS=Homo sapiens GN=SNRPD1 PE=1 SV=1	27.7311	2	3	2	1	119	13.3	11.56
P52209	6-phosphogluconate dehydrogenase, decarboxylating OS=Homo sapiens GN=PGD PE=1 SV=3	8.28157	3	3	3	1	483	53.1	7.23
Q00688	Peptidyl-prolyl cis-trans isomerase FKBP3 OS=Homo sapiens GN=FKBP3 PE=1 SV=1	15.1786	3	4	3	1	224	25.2	9.28
P60981	Destrin OS=Homo sapiens GN=DSTN PE=1 SV=3	27.2727	4	4	3	1	165	18.5	7.85
Q8IXM3	39S ribosomal protein L41, mitochondrial OS=Homo sapiens GN=MRPL41 PE=1 SV=1	35.0365	2	3	2	1	137	15.4	9.57
P53597	Succinate--CoA ligase [ADP/GDP-forming] subunit alpha, mitochondrial OS=Homo sapiens GN=SUCLG1 PE=1 SV=4	9.82659	3	3	3	1	346	36.2	8.79
P62304	Small nuclear ribonucleoprotein E OS=Homo sapiens GN=SNRPE PE=1 SV=1	39.1304	2	2	2	1	92	10.8	9.44
Q8IVF2	Protein AHNAK2 OS=Homo sapiens GN=AHNAK2 PE=1 SV=2	1.6566	4	5	4	1	5795	616.2	5.36
O15260	Surfeit locus protein 4 OS=Homo sapiens GN=SURF4 PE=1 SV=3	13.7546	3	3	3	1	269	30.4	7.78
O00148	ATP-dependent RNA helicase DDX39A OS=Homo sapiens GN=DDX39A PE=1 SV=2	16.1593	5	6	1	1	427	49.1	5.68
Q15233	Non-POU domain-containing octamer-binding protein OS=Homo sapiens GN=NONO PE=1 SV=4	11.0403	3	3	2	1	471	54.2	8.95
Q13242	Serine/arginine-rich splicing factor 9 OS=Homo sapiens GN=SRSF9 PE=1 SV=1	14.9321	3	3	3	1	221	25.5	8.65
Q96N66	Lysophospholipid acyltransferase 7 OS=Homo sapiens GN=MBOAT7 PE=1 SV=2	9.74576	3	3	3	1	472	52.7	8.97
E9PAV3	Nascent polypeptide-associated complex subunit alpha, muscle-specific form OS=Homo sapiens GN=NACA PE=1 SV=1	1.39557	2	2	2	1	2078	205.3	9.58
P51398	28S ribosomal protein S29, mitochondrial OS=Homo sapiens GN=DAP3 PE=1 SV=1	8.79397	2	3	2	1	398	45.5	8.88
O75746	Calcium-binding mitochondrial carrier protein Aralar1 OS=Homo sapiens GN=SLC25A12 PE=1 SV=2	6.34218	4	4	1	1	678	74.7	8.38
Q9UII2	ATPase inhibitor, mitochondrial OS=Homo sapiens GN=ATPIF1 PE=1 SV=1	17.9245	3	7	3	1	106	12.2	9.35
Q92552	Isoform 2 of 28S ribosomal protein S27, mitochondrial OS=Homo sapiens GN=MRPS27	9.57944	2	2	2	1	428	49.1	6.33
Q13501	Sequestosome-1 OS=Homo sapiens GN=SQSTM1 PE=1 SV=1	11.5909	3	3	3	1	440	47.7	5.22
Q00765	Receptor expression-enhancing protein 5 OS=Homo sapiens GN=REEP5 PE=1 SV=3	21.164	5	5	5	1	189	21.5	8.1
Q86UE4	Protein LYRIC OS=Homo sapiens GN=MTDH PE=1 SV=2	11.8557	4	5	4	1	582	63.8	9.32
Q9BRJ2	39S ribosomal protein L45, mitochondrial OS=Homo sapiens GN=MRPL45 PE=1 SV=2	15.6863	2	3	2	1	306	35.3	9.03
Q99497	Protein deglycase DJ-1 OS=Homo sapiens GN=PARK7 PE=1 SV=2	22.2222	2	2	2	1	189	19.9	6.79
O14828	Secretory carrier-associated membrane protein 3 OS=Homo sapiens GN=SCAMP3 PE=1 SV=3	8.64553	2	3	2	1	347	38.3	7.64
Q9Y224	UPF0568 protein C14orf166 OS=Homo sapiens GN=C14orf166 PE=1 SV=1	17.2131	3	3	3	1	244	28.1	6.65
P62854	40S ribosomal protein S26 OS=Homo sapiens GN=RPS26 PE=1 SV=3	33.913	3	3	3	1	115	13	11
Q9H3N1	Thioredoxin-related transmembrane protein 1 OS=Homo sapiens GN=TMX1 PE=1 SV=1	15.3571	4	4	4	1	280	31.8	4.98
P11279	Lysosome-associated membrane glycoprotein 1 OS=Homo sapiens GN=LAMP1 PE=1 SV=3	8.39329	3	3	3	1	417	44.9	8.75
Q86XR7	Isoform 2 of TIR domain-containing adapter molecule 2 OS=Homo sapiens GN=TICAM2	10.8911	4	4	4	1	404	46.1	5.12
Q9NR31	GTP-binding protein SAR1a OS=Homo sapiens GN=SAR1A PE=1 SV=1	25.7576	4	4	4	1	198	22.4	6.68
Q96C01	Protein FAM136A OS=Homo sapiens GN=FAM136A PE=1 SV=1	26.8116	3	3	3	1	138	15.6	7.61
P49915	GMP synthase [glutamine-hydrolyzing] OS=Homo sapiens GN=GMPS PE=1 SV=1	4.329	2	3	2	1	693	76.7	6.87
Q9H845	Acyl-CoA dehydrogenase family member 9, mitochondrial OS=Homo sapiens GN=ACAD9 PE=1 SV=1	5.47504	2	2	2	1	621	68.7	7.96
P61106	Ras-related protein Rab-14 OS=Homo sapiens GN=RAB14 PE=1 SV=4	23.2558	4	5	3	1	215	23.9	6.21
Q9NTG7	NAD-dependent protein deacetylase sirtuin-3, mitochondrial OS=Homo sapiens GN=SIRT3 PE=1 SV=2	8.27068	2	2	2	1	399	43.5	8.7
Q9NX63	MICOS complex subunit MIC19 OS=Homo sapiens GN=CHCHD3 PE=1 SV=1	22.9075	5	5	5	1	227	26.1	8.28
Q9H2W6	39S ribosomal protein L46, mitochondrial OS=Homo sapiens GN=MRPL46 PE=1 SV=1	8.24373	2	2	2	1	279	31.7	7.05
P56385	ATP synthase subunit e, mitochondrial OS=Homo sapiens GN=ATP5I PE=1 SV=2	44.9275	3	4	3	1	69	7.9	9.35
P07858	Cathepsin B OS=Homo sapiens GN=CTSB PE=1 SV=3	10.6195	3	3	3	1	339	37.8	6.3
P60903	Protein S100-A10 OS=Homo sapiens GN=S100A10 PE=1 SV=2	34.0206	4	5	4	1	97	11.2	7.37
Q9BZE1	39S ribosomal protein L37, mitochondrial OS=Homo sapiens GN=MRPL37 PE=1 SV=2	10.4019	2	3	2	1	423	48.1	8.59
Q14152	Eukaryotic translation initiation factor 3 subunit A OS=Homo sapiens GN=EIF3A PE=1 SV=1	2.74964	2	2	2	1	1382	166.5	6.79
P16989	Y-box-binding protein 3 OS=Homo sapiens GN=YBX3 PE=1 SV=4	18.2796	3	3	1	1	372	40.1	9.77
P99999	Cytochrome c OS=Homo sapiens GN=CYCS PE=1 SV=2	48.5714	4	5	4	1	105	11.7	9.57
P21912	Succinate dehydrogenase [ubiquinone] iron-sulfur subunit, mitochondrial OS=Homo sapiens GN=SDHB PE=1 SV=3	14.2857	4	4	4	1	280	31.6	8.76
Q9P035	Very-long-chain (3R)-3-hydroxyacyl-CoA dehydratase 3 OS=Homo sapiens GN=HACD3 PE=1 SV=2	10.7735	3	3	3	1	362	43.1	8.94
Q9Y3I0	tRNA-splicing ligase RtcB homolog OS=Homo sapiens GN=RTCB PE=1 SV=1	9.90099	3	4	3	1	505	55.2	7.23
Q15404	Ras suppressor protein 1 OS=Homo sapiens GN=RSU1 PE=1 SV=3	18.0505	2	2	2	1	277	31.5	8.65
Q13724	Mannosyl-oligosaccharide glucosidase OS=Homo sapiens GN=MOGS PE=1 SV=5	7.40741	3	4	3	1	837	91.9	8.9
P62906	60S ribosomal protein L10a OS=Homo sapiens GN=RPL10A PE=1 SV=2	27.6498	5	5	5	1	217	24.8	9.94
Q96HS1	Serine/threonine-protein phosphatase PGAM5, mitochondrial OS=Homo sapiens GN=PGAM5 PE=1 SV=2	10.3806	3	4	3	1	289	32	8.68
P60033	CD81 antigen OS=Homo sapiens GN=CD81 PE=1 SV=1	15.2542	2	3	2	1	236	25.8	5.29
Q16643	Isoform 3 of Drebrin OS=Homo sapiens GN=DBN1	6.04317	3	3	3	1	695	76.3	4.51
Q13232	Nucleoside diphosphate kinase 3 OS=Homo sapiens GN=NME3 PE=1 SV=2	26.0355	3	3	3	1	169	19	7.84
Q86VP6	Cullin-associated NEDD8-dissociated protein 1 OS=Homo sapiens GN=CAND1 PE=1 SV=2	2.68293	2	2	2	1	1230	136.3	5.78
Q9H6S3	Isoform 3 of Epidermal growth factor receptor kinase substrate 8-like protein 2 OS=Homo sapiens GN=EPS8L2	6.83995	2	2	2	1	731	82.3	7.03
Q01081	Splicing factor U2AF 35 kDa subunit OS=Homo sapiens GN=U2AF1 PE=1 SV=3	16.25	3	3	3	1	240	27.9	8.81
Q9ULC4	Isoform 3 of Malignant T-cell-amplified sequence 1 OS=Homo sapiens GN=MCTS1	21.4286	2	2	2	1	182	20.5	8.82
Q12905	Interleukin enhancer-binding factor 2 OS=Homo sapiens GN=ILF2 PE=1 SV=2	7.69231	2	2	2	1	390	43	5.26
P05455	Lupus La protein OS=Homo sapiens GN=SSB PE=1 SV=2	6.61765	2	2	2	1	408	46.8	7.12
P62745	Rho-related GTP-binding protein RhoB OS=Homo sapiens GN=RHOB PE=1 SV=1	25.5102	3	4	1	1	196	22.1	5.24
O15269	Serine palmitoyltransferase 1 OS=Homo sapiens GN=SPTLC1 PE=1 SV=1	7.61099	3	3	3	1	473	52.7	6.01
P84243	Histone H3.3 OS=Homo sapiens GN=H3F3A PE=1 SV=2	28.6765	2	3	2	1	136	15.3	11.27
P17812	CTP synthase 1 OS=Homo sapiens GN=CTPS1 PE=1 SV=2	4.39932	2	3	2	1	591	66.6	6.46
Q12874	Splicing factor 3A subunit 3 OS=Homo sapiens GN=SF3A3 PE=1 SV=1	6.78643	2	2	2	1	501	58.8	5.38
Q14554	Protein disulfide-isomerase A5 OS=Homo sapiens GN=PDIA5 PE=1 SV=1	8.47784	2	2	2	1	519	59.6	7.91
P47756	Isoform 2 of F-actin-capping protein subunit beta OS=Homo sapiens GN=CAPZB	12.8676	4	4	4	1	272	30.6	6
P52907	F-actin-capping protein subunit alpha-1 OS=Homo sapiens GN=CAPZA1 PE=1 SV=3	9.79021	2	2	1	1	286	32.9	5.69
P45954	Short/branched chain specific acyl-CoA dehydrogenase, mitochondrial OS=Homo sapiens GN=ACADSB PE=1 SV=1	7.40741	2	2	2	1	432	47.5	6.99
Q9Y676	28S ribosomal protein S18b, mitochondrial OS=Homo sapiens GN=MRPS18B PE=1 SV=1	12.4031	2	2	2	1	258	29.4	9.38
P62070	Isoform 4 of Ras-related protein R-Ras2 OS=Homo sapiens GN=RRAS2	13.3333	2	2	2	1	210	24.2	6.01
Q9Y276	Mitochondrial chaperone BCS1 OS=Homo sapiens GN=BCS1L PE=1 SV=1	10.7399	2	2	2	1	419	47.5	8.5
P26440	Isovaleryl-CoA dehydrogenase, mitochondrial OS=Homo sapiens GN=IVD PE=1 SV=1	18.2033	4	5	4	1	423	46.3	8.19
Q92504	Zinc transporter SLC39A7 OS=Homo sapiens GN=SLC39A7 PE=1 SV=2	8.52878	2	2	2	1	469	50.1	6.87
P62913	60S ribosomal protein L11 OS=Homo sapiens GN=RPL11 PE=1 SV=2	20.2247	4	4	4	1	178	20.2	9.6
Q9UHD8	Septin-9 OS=Homo sapiens GN=SEPT9 PE=1 SV=2	9.38567	4	4	4	1	586	65.4	8.97
Q8NI22	Multiple coagulation factor deficiency protein 2 OS=Homo sapiens GN=MCFD2 PE=1 SV=1	28.0822	2	2	2	1	146	16.4	4.63
Q9Y3B7	39S ribosomal protein L11, mitochondrial OS=Homo sapiens GN=MRPL11 PE=1 SV=1	19.2708	3	3	3	1	192	20.7	9.91
Q9UBX3	Isoform 2 of Mitochondrial dicarboxylate carrier OS=Homo sapiens GN=SLC25A10	19.2568	3	3	3	1	296	32.1	9.35
P62910	60S ribosomal protein L32 OS=Homo sapiens GN=RPL32 PE=1 SV=2	20	3	4	3	1	135	15.9	11.33
P20340	Ras-related protein Rab-6A OS=Homo sapiens GN=RAB6A PE=1 SV=3	19.2308	4	5	3	1	208	23.6	5.54
P84103	Serine/arginine-rich splicing factor 3 OS=Homo sapiens GN=SRSF3 PE=1 SV=1	18.2927	3	3	2	1	164	19.3	11.65
Q9H078	Caseinolytic peptidase B protein homolog OS=Homo sapiens GN=CLPB PE=1 SV=1	6.64781	3	3	3	1	707	78.7	9.01
P60660	Myosin light polypeptide 6 OS=Homo sapiens GN=MYL6 PE=1 SV=2	15.894	2	2	2	1	151	16.9	4.65
Q5JTV8	Torsin-1A-interacting protein 1 OS=Homo sapiens GN=TOR1AIP1 PE=1 SV=2	6.51801	3	3	3	1	583	66.2	8.18
Q8NFQ8	Torsin-1A-interacting protein 2 OS=Homo sapiens GN=TOR1AIP2 PE=1 SV=1	8.29787	2	3	2	1	470	51.2	4.96
P82673	28S ribosomal protein S35, mitochondrial OS=Homo sapiens GN=MRPS35 PE=1 SV=1	11.4551	2	2	2	1	323	36.8	8.24
Q99653	Calcineurin B homologous protein 1 OS=Homo sapiens GN=CHP1 PE=1 SV=3	14.359	2	2	2	1	195	22.4	5.1
O15372	Eukaryotic translation initiation factor 3 subunit H OS=Homo sapiens GN=EIF3H PE=1 SV=1	8.23864	3	3	3	1	352	39.9	6.54
O95197	Isoform 3 of Reticulon-3 OS=Homo sapiens GN=RTN3	14.4068	3	3	3	1	236	25.6	8.51
Q13405	39S ribosomal protein L49, mitochondrial OS=Homo sapiens GN=MRPL49 PE=1 SV=1	15.6627	2	2	2	1	166	19.2	9.45
Q9UGP8	Translocation protein SEC63 homolog OS=Homo sapiens GN=SEC63 PE=1 SV=2	5.26316	3	3	3	1	760	87.9	5.31
Q9Y5J7	Mitochondrial import inner membrane translocase subunit Tim9 OS=Homo sapiens GN=TIMM9 PE=1 SV=1	30.3371	2	2	2	1	89	10.4	7.21
P26006	Isoform 2 of Integrin alpha-3 OS=Homo sapiens GN=ITGA3	3.93996	4	4	4	1	1066	118.7	6.96
P53618	Coatomer subunit beta OS=Homo sapiens GN=COPB1 PE=1 SV=3	5.03673	3	3	3	1	953	107.1	6.05
P55957	Isoform 2 of BH3-interacting domain death agonist OS=Homo sapiens GN=BID	6.22407	1	3	1	1	241	26.8	7.08
P49006	MARCKS-related protein OS=Homo sapiens GN=MARCKSL1 PE=1 SV=2	14.359	2	2	2	1	195	19.5	4.67
P83881	60S ribosomal protein L36a OS=Homo sapiens GN=RPL36A PE=1 SV=2	26.4151	4	5	4	1	106	12.4	10.58
P61923	Isoform 4 of Coatomer subunit zeta-1 OS=Homo sapiens GN=COPZ1	23.7838	3	3	3	1	185	21.1	4.88
Q15363	Transmembrane emp24 domain-containing protein 2 OS=Homo sapiens GN=TMED2 PE=1 SV=1	22.8856	3	3	3	1	201	22.7	5.17
Q9ULV4	Isoform 3 of Coronin-1C OS=Homo sapiens GN=CORO1C	7.02087	2	2	2	1	527	58.9	7.75
P60900	Proteasome subunit alpha type-6 OS=Homo sapiens GN=PSMA6 PE=1 SV=1	17.0732	3	3	3	1	246	27.4	6.76
O15173	Isoform 2 of Membrane-associated progesterone receptor component 2 OS=Homo sapiens GN=PGRMC2	12.5506	3	3	2	1	247	26.2	5.31
O15144	Actin-related protein 2/3 complex subunit 2 OS=Homo sapiens GN=ARPC2 PE=1 SV=1	16	3	4	3	1	300	34.3	7.36
Q14165	Malectin OS=Homo sapiens GN=MLEC PE=1 SV=1	14.726	3	3	3	1	292	32.2	5.41
P61916	Epididymal secretory protein E1 OS=Homo sapiens GN=NPC2 PE=1 SV=1	27.8146	3	3	3	1	151	16.6	7.65
P48643	T-complex protein 1 subunit epsilon OS=Homo sapiens GN=CCT5 PE=1 SV=1	7.20887	3	4	3	1	541	59.6	5.66
Q9Y237	Isoform 2 of Peptidyl-prolyl cis-trans isomerase NIMA-interacting 4 OS=Homo sapiens GN=PIN4	26.9231	2	2	2	1	156	16.6	9.96
Q9H7Z7	Prostaglandin E synthase 2 OS=Homo sapiens GN=PTGES2 PE=1 SV=1	11.4058	2	2	2	1	377	41.9	9.16
P49458	Signal recognition particle 9 kDa protein OS=Homo sapiens GN=SRP9 PE=1 SV=2	40.6977	4	4	4	1	86	10.1	7.97
Q7L5N7	Lysophosphatidylcholine acyltransferase 2 OS=Homo sapiens GN=LPCAT2 PE=1 SV=1	8.08824	3	3	3	1	544	60.2	6.55
Q6PKG0	La-related protein 1 OS=Homo sapiens GN=LARP1 PE=1 SV=2	2.64599	2	2	2	1	1096	123.4	8.82
P47755	F-actin-capping protein subunit alpha-2 OS=Homo sapiens GN=CAPZA2 PE=1 SV=3	9.79021	2	2	1	1	286	32.9	5.85
P61803	Dolichyl-diphosphooligosaccharide--protein glycosyltransferase subunit DAD1 OS=Homo sapiens GN=DAD1 PE=1 SV=3	26.5487	3	4	3	1	113	12.5	7.08
P05121	Plasminogen activator inhibitor 1 OS=Homo sapiens GN=SERPINE1 PE=1 SV=1	12.9353	3	3	3	1	402	45	7.2
Q9Y2W1	Thyroid hormone receptor-associated protein 3 OS=Homo sapiens GN=THRAP3 PE=1 SV=2	3.03665	2	2	2	1	955	108.6	10.15
Q92945	Far upstream element-binding protein 2 OS=Homo sapiens GN=KHSRP PE=1 SV=4	4.782	3	3	2	1	711	73.1	7.3
Q96M27	Isoform 2 of Protein PRRC1 OS=Homo sapiens GN=PRRC1	6.89655	2	2	2	1	464	48.5	5.39
O94979	Isoform 8 of Protein transport protein Sec31A OS=Homo sapiens GN=SEC31A	3.81184	2	3	2	1	1233	134.4	6.73
P07195	L-lactate dehydrogenase B chain OS=Homo sapiens GN=LDHB PE=1 SV=2	9.28144	2	3	2	1	334	36.6	6.05
O95292	Vesicle-associated membrane protein-associated protein B/C OS=Homo sapiens GN=VAPB PE=1 SV=3	16.4609	3	3	3	1	243	27.2	7.3
O75323	Protein NipSnap homolog 2 OS=Homo sapiens GN=GBAS PE=1 SV=1	10.1399	2	2	2	1	286	33.7	9.36
Q9UHB9	Signal recognition particle subunit SRP68 OS=Homo sapiens GN=SRP68 PE=1 SV=2	5.90112	2	2	2	1	627	70.7	8.56
P37108	Signal recognition particle 14 kDa protein OS=Homo sapiens GN=SRP14 PE=1 SV=2	15.4412	2	3	2	1	136	14.6	10.04
P51858	Hepatoma-derived growth factor OS=Homo sapiens GN=HDGF PE=1 SV=1	15.4167	2	2	2	1	240	26.8	4.73
P08559	Isoform 4 of Pyruvate dehydrogenase E1 component subunit alpha, somatic form, mitochondrial OS=Homo sapiens GN=PDHA1	7.24299	3	3	3	1	428	47.5	8.54
Q53H12	Acylglycerol kinase, mitochondrial OS=Homo sapiens GN=AGK PE=1 SV=2	8.05687	2	2	2	1	422	47.1	8.09
Q92667	A-kinase anchor protein 1, mitochondrial OS=Homo sapiens GN=AKAP1 PE=1 SV=1	2.65781	1	1	1	1	903	97.3	4.94
O43678	NADH dehydrogenase [ubiquinone] 1 alpha subcomplex subunit 2 OS=Homo sapiens GN=NDUFA2 PE=1 SV=3	30.303	2	2	2	1	99	10.9	9.57
P50402	Emerin OS=Homo sapiens GN=EMD PE=1 SV=1	19.2913	4	5	4	1	254	29	5.5
Q9Y5U9	Immediate early response 3-interacting protein 1 OS=Homo sapiens GN=IER3IP1 PE=1 SV=1	24.3902	1	2	1	1	82	9	8.22
Q96EP5	DAZ-associated protein 1 OS=Homo sapiens GN=DAZAP1 PE=1 SV=1	7.61671	2	2	2	1	407	43.4	8.56
P61088	Ubiquitin-conjugating enzyme E2 N OS=Homo sapiens GN=UBE2N PE=1 SV=1	20.3947	2	2	2	1	152	17.1	6.57
P09110	3-ketoacyl-CoA thiolase, peroxisomal OS=Homo sapiens GN=ACAA1 PE=1 SV=2	8.72642	2	2	2	1	424	44.3	8.44
Q01813	ATP-dependent 6-phosphofructokinase, platelet type OS=Homo sapiens GN=PFKP PE=1 SV=2	4.08163	2	2	2	1	784	85.5	7.55
P59998	Isoform 2 of Actin-related protein 2/3 complex subunit 4 OS=Homo sapiens GN=ARPC4	4.48	3	3	3	1	625	71.7	5.88
P09543	2',3'-cyclic-nucleotide 3'-phosphodiesterase OS=Homo sapiens GN=CNP PE=1 SV=2	5.46318	1	1	1	1	421	47.5	9.07
P42677	40S ribosomal protein S27 OS=Homo sapiens GN=RPS27 PE=1 SV=3	38.0952	3	3	3	1	84	9.5	9.45
P49207	60S ribosomal protein L34 OS=Homo sapiens GN=RPL34 PE=1 SV=3	28.2051	4	4	4	1	117	13.3	11.47
Q8TCS8	Polyribonucleotide nucleotidyltransferase 1, mitochondrial OS=Homo sapiens GN=PNPT1 PE=1 SV=2	5.23627	2	2	2	1	783	85.9	7.77
P82650	28S ribosomal protein S22, mitochondrial OS=Homo sapiens GN=MRPS22 PE=1 SV=1	10.5556	2	3	2	1	360	41.3	7.9
P60866	Isoform 2 of 40S ribosomal protein S20 OS=Homo sapiens GN=RPS20	25.3521	4	4	3	1	142	16	9.32
Q9BUP0	EF-hand domain-containing protein D1 OS=Homo sapiens GN=EFHD1 PE=1 SV=1	16.7364	2	2	2	1	239	26.9	5.39
O00161	Synaptosomal-associated protein 23 OS=Homo sapiens GN=SNAP23 PE=1 SV=1	16.5877	2	2	2	1	211	23.3	5.01
P30042	ES1 protein homolog, mitochondrial OS=Homo sapiens GN=C21orf33 PE=1 SV=3	13.0597	2	2	2	1	268	28.2	8.27
O95881	Thioredoxin domain-containing protein 12 OS=Homo sapiens GN=TXNDC12 PE=1 SV=1	13.9535	2	2	2	1	172	19.2	5.4
Q9Y3A6	Transmembrane emp24 domain-containing protein 5 OS=Homo sapiens GN=TMED5 PE=1 SV=1	10.0437	2	2	2	1	229	26	4.84
Q9UNX3	60S ribosomal protein L26-like 1 OS=Homo sapiens GN=RPL26L1 PE=1 SV=1	17.2414	4	4	1	1	145	17.2	10.55
P07686	Beta-hexosaminidase subunit beta OS=Homo sapiens GN=HEXB PE=1 SV=3	5.7554	2	2	2	1	556	63.1	6.76
Q9BSH4	Translational activator of cytochrome c oxidase 1 OS=Homo sapiens GN=TACO1 PE=1 SV=1	17.5084	2	3	2	1	297	32.5	8.13
O15400	Syntaxin-7 OS=Homo sapiens GN=STX7 PE=1 SV=4	14.5594	3	3	3	1	261	29.8	5.55
P13473	Isoform LAMP-2C of Lysosome-associated membrane glycoprotein 2 OS=Homo sapiens GN=LAMP2	7.05596	3	3	3	1	411	45.1	5.91
O95202	LETM1 and EF-hand domain-containing protein 1, mitochondrial OS=Homo sapiens GN=LETM1 PE=1 SV=1	4.46549	2	2	2	1	739	83.3	6.7
Q8IYB3	Serine/arginine repetitive matrix protein 1 OS=Homo sapiens GN=SRRM1 PE=1 SV=2	2.98673	2	3	2	1	904	102.3	11.84
Q9UHG3	Prenylcysteine oxidase 1 OS=Homo sapiens GN=PCYOX1 PE=1 SV=3	9.10891	4	5	4	1	505	56.6	6.18
P52294	Importin subunit alpha-5 OS=Homo sapiens GN=KPNA1 PE=1 SV=3	6.50558	2	2	2	1	538	60.2	5.01
Q14677	Clathrin interactor 1 OS=Homo sapiens GN=CLINT1 PE=1 SV=1	4.8	3	3	3	1	625	68.2	6.42
P50502	Hsc70-interacting protein OS=Homo sapiens GN=ST13 PE=1 SV=2	7.31707	2	2	2	1	369	41.3	5.27
P35914	Hydroxymethylglutaryl-CoA lyase, mitochondrial OS=Homo sapiens GN=HMGCL PE=1 SV=2	8	2	2	2	1	325	34.3	8.54
Q9Y241	Isoform 2 of HIG1 domain family member 1A, mitochondrial OS=Homo sapiens GN=HIGD1A	20.5607	1	2	1	1	107	11.8	9.44
P52292	Importin subunit alpha-1 OS=Homo sapiens GN=KPNA2 PE=1 SV=1	7.56144	2	2	2	1	529	57.8	5.4
P62805	Histone H4 OS=Homo sapiens GN=HIST1H4A PE=1 SV=2	29.1262	3	4	3	1	103	11.4	11.36
Q9UBQ7	Glyoxylate reductase/hydroxypyruvate reductase OS=Homo sapiens GN=GRHPR PE=1 SV=1	10.3659	2	2	2	1	328	35.6	7.39
Q15459	Splicing factor 3A subunit 1 OS=Homo sapiens GN=SF3A1 PE=1 SV=1	4.91803	2	3	2	1	793	88.8	5.22
Q15125	3-beta-hydroxysteroid-Delta(8),Delta(7)-isomerase OS=Homo sapiens GN=EBP PE=1 SV=3	9.56522	2	3	2	1	230	26.3	7.9
Q16798	NADP-dependent malic enzyme, mitochondrial OS=Homo sapiens GN=ME3 PE=2 SV=2	4.4702	1	1	1	1	604	67	7.97
P21291	Cysteine and glycine-rich protein 1 OS=Homo sapiens GN=CSRP1 PE=1 SV=3	20.2073	2	3	2	1	193	20.6	8.57
Q9GZT6	Coiled-coil domain-containing protein 90B, mitochondrial OS=Homo sapiens GN=CCDC90B PE=1 SV=2	9.05512	1	1	1	1	254	29.5	7.55
P63173	60S ribosomal protein L38 OS=Homo sapiens GN=RPL38 PE=1 SV=2	32.8571	2	2	2	1	70	8.2	10.1
P25787	Proteasome subunit alpha type-2 OS=Homo sapiens GN=PSMA2 PE=1 SV=2	8.11966	1	1	1	1	234	25.9	7.43
Q9NX14	Isoform 2 of NADH dehydrogenase [ubiquinone] 1 beta subcomplex subunit 11, mitochondrial OS=Homo sapiens GN=NDUFB11	14.1104	1	2	1	1	163	18.4	5.24
P43487	Ran-specific GTPase-activating protein OS=Homo sapiens GN=RANBP1 PE=1 SV=1	26.8657	3	3	3	1	201	23.3	5.29
P05198	Eukaryotic translation initiation factor 2 subunit 1 OS=Homo sapiens GN=EIF2S1 PE=1 SV=3	12.6984	2	2	2	1	315	36.1	5.08
P61619	Protein transport protein Sec61 subunit alpha isoform 1 OS=Homo sapiens GN=SEC61A1 PE=1 SV=2	6.72269	2	2	2	1	476	52.2	8.06
Q96JJ7	Protein disulfide-isomerase TMX3 OS=Homo sapiens GN=TMX3 PE=1 SV=2	7.04846	1	1	1	1	454	51.8	4.91
P68400	Casein kinase II subunit alpha OS=Homo sapiens GN=CSNK2A1 PE=1 SV=1	9.46292	2	2	2	1	391	45.1	7.74
P23434	Glycine cleavage system H protein, mitochondrial OS=Homo sapiens GN=GCSH PE=1 SV=2	22.5434	2	2	2	1	173	18.9	4.88
P18077	60S ribosomal protein L35a OS=Homo sapiens GN=RPL35A PE=1 SV=2	31.8182	4	5	4	1	110	12.5	11.06
O95573	Long-chain-fatty-acid--CoA ligase 3 OS=Homo sapiens GN=ACSL3 PE=1 SV=3	2.5	1	1	1	1	720	80.4	8.38
Q5QNW6	Isoform 2 of Histone H2B type 2-F OS=Homo sapiens GN=HIST2H2BF	14.9254	2	3	2	1	134	14.8	10.35
O43752	Syntaxin-6 OS=Homo sapiens GN=STX6 PE=1 SV=1	9.80392	1	1	1	1	255	29.2	4.93
P56134	ATP synthase subunit f, mitochondrial OS=Homo sapiens GN=ATP5J2 PE=1 SV=3	25.5319	2	2	2	1	94	10.9	9.67
Q96NT0	Isoform 2 of Coiled-coil domain-containing protein 115 OS=Homo sapiens GN=CCDC115	13.8298	1	1	1	1	188	20.4	8.34
P61956	Small ubiquitin-related modifier 2 OS=Homo sapiens GN=SUMO2 PE=1 SV=3	23.1579	2	3	2	1	95	10.9	5.5
Q969Z0	Protein TBRG4 OS=Homo sapiens GN=TBRG4 PE=1 SV=1	5.54675	2	3	2	1	631	70.7	7.42
P11047	Laminin subunit gamma-1 OS=Homo sapiens GN=LAMC1 PE=1 SV=3	1.36731	1	1	1	1	1609	177.5	5.12
Q15019	Isoform 2 of Septin-2 OS=Homo sapiens GN=SEPT2	6.56566	1	1	1	1	396	45.4	6.89
O95232	Luc7-like protein 3 OS=Homo sapiens GN=LUC7L3 PE=1 SV=2	7.40741	1	1	1	1	432	51.4	9.79
P62847	Isoform 4 of 40S ribosomal protein S24 OS=Homo sapiens GN=RPS24	9.34256	2	3	2	1	289	32.4	10.15
P84085	ADP-ribosylation factor 5 OS=Homo sapiens GN=ARF5 PE=1 SV=2	17.2222	2	2	1	1	180	20.5	6.79
Q9UQB8	Brain-specific angiogenesis inhibitor 1-associated protein 2 OS=Homo sapiens GN=BAIAP2 PE=1 SV=1	7.24638	2	3	2	1	552	60.8	8.9
P17844	Probable ATP-dependent RNA helicase DDX5 OS=Homo sapiens GN=DDX5 PE=1 SV=1	6.18893	3	3	1	1	614	69.1	8.92
Q9BUP3	Isoform 3 of Oxidoreductase HTATIP2 OS=Homo sapiens GN=HTATIP2	16.6667	3	3	3	1	276	30.1	8.38
Q06481	Amyloid-like protein 2 OS=Homo sapiens GN=APLP2 PE=1 SV=2	3.66972	2	2	1	1	763	86.9	4.79
P53999	Activated RNA polymerase II transcriptional coactivator p15 OS=Homo sapiens GN=SUB1 PE=1 SV=3	26.7717	3	3	3	1	127	14.4	9.6
Q5XKP0	MICOS complex subunit MIC13 OS=Homo sapiens GN=MIC13 PE=1 SV=1	32.2034	2	3	2	1	118	13.1	9.42
Q9Y371	Isoform 2 of Endophilin-B1 OS=Homo sapiens GN=SH3GLB1	6.73575	2	2	2	1	386	43.2	5.68
Q53GQ0	Very-long-chain 3-oxoacyl-CoA reductase OS=Homo sapiens GN=HSD17B12 PE=1 SV=2	14.1026	3	3	3	1	312	34.3	9.32
Q86Y39	Isoform 2 of NADH dehydrogenase [ubiquinone] 1 alpha subcomplex subunit 11 OS=Homo sapiens GN=NDUFA11	10.0877	1	1	1	1	228	23.4	8.82
Q8N766	ER membrane protein complex subunit 1 OS=Homo sapiens GN=EMC1 PE=1 SV=1	1.91339	1	1	1	1	993	111.7	7.66
Q9NPR2	Semaphorin-4B OS=Homo sapiens GN=SEMA4B PE=1 SV=3	5.64904	3	3	3	1	832	92.1	6.95
Q9Y285	Phenylalanine--tRNA ligase alpha subunit OS=Homo sapiens GN=FARSA PE=1 SV=3	5.51181	2	2	2	1	508	57.5	7.8
P42166	Lamina-associated polypeptide 2, isoform alpha OS=Homo sapiens GN=TMPO PE=1 SV=2	3.31412	1	1	1	1	694	75.4	7.66
P26640	Valine--tRNA ligase OS=Homo sapiens GN=VARS PE=1 SV=4	2.8481	1	2	1	1	1264	140.4	7.59
P31942	Heterogeneous nuclear ribonucleoprotein H3 OS=Homo sapiens GN=HNRNPH3 PE=1 SV=2	8.67052	2	2	2	1	346	36.9	6.87
P62857	40S ribosomal protein S28 OS=Homo sapiens GN=RPS28 PE=1 SV=1	33.3333	2	2	2	1	69	7.8	10.7
Q99733	Isoform 2 of Nucleosome assembly protein 1-like 4 OS=Homo sapiens GN=NAP1L4	9.32642	3	4	2	1	386	44.1	4.7
P14406	Cytochrome c oxidase subunit 7A2, mitochondrial OS=Homo sapiens GN=COX7A2 PE=1 SV=1	27.7108	2	3	2	1	83	9.4	9.76
P15586	N-acetylglucosamine-6-sulfatase OS=Homo sapiens GN=GNS PE=1 SV=3	6.7029	2	3	2	1	552	62	8.31
P42785	Isoform 2 of Lysosomal Pro-X carboxypeptidase OS=Homo sapiens GN=PRCP	5.80271	2	2	2	1	517	58.1	7.4
Q9BWD1	Isoform 2 of Acetyl-CoA acetyltransferase, cytosolic OS=Homo sapiens GN=ACAT2	6.33803	1	1	1	1	426	44.6	8.46
O60220	Mitochondrial import inner membrane translocase subunit Tim8 A OS=Homo sapiens GN=TIMM8A PE=1 SV=1	30.9278	3	3	3	1	97	11	5.16
Q86TS9	39S ribosomal protein L52, mitochondrial OS=Homo sapiens GN=MRPL52 PE=1 SV=2	26.8293	1	1	1	1	123	13.7	10.26
Q01130	Serine/arginine-rich splicing factor 2 OS=Homo sapiens GN=SRSF2 PE=1 SV=4	8.59729	2	4	2	1	221	25.5	11.85
P47914	60S ribosomal protein L29 OS=Homo sapiens GN=RPL29 PE=1 SV=2	14.4654	2	2	2	1	159	17.7	11.66
P22570	Isoform 3 of NADPH:adrenodoxin oxidoreductase, mitochondrial OS=Homo sapiens GN=FDXR	5.80524	2	2	2	1	534	58.3	7.87
Q8WWM7	Isoform 3 of Ataxin-2-like protein OS=Homo sapiens GN=ATXN2L	3.91978	3	3	3	1	1097	115.5	8.66
P10599	Thioredoxin OS=Homo sapiens GN=TXN PE=1 SV=3	20.9524	2	2	2	1	105	11.7	4.92
Q9UN86	Ras GTPase-activating protein-binding protein 2 OS=Homo sapiens GN=G3BP2 PE=1 SV=2	3.52697	1	1	1	1	482	54.1	5.55
Q6RW13	Type-1 angiotensin II receptor-associated protein OS=Homo sapiens GN=AGTRAP PE=1 SV=1	13.8365	1	1	1	1	159	17.4	6.14
P04632	Calpain small subunit 1 OS=Homo sapiens GN=CAPNS1 PE=1 SV=1	8.95522	1	1	1	1	268	28.3	5.2
Q8NE62	Choline dehydrogenase, mitochondrial OS=Homo sapiens GN=CHDH PE=1 SV=2	4.20875	1	1	1	1	594	65.3	8.28
Q04941	Proteolipid protein 2 OS=Homo sapiens GN=PLP2 PE=1 SV=1	18.4211	2	2	2	1	152	16.7	7.24
P62633	Isoform 6 of Cellular nucleic acid-binding protein OS=Homo sapiens GN=CNBP	12.8492	2	2	2	1	179	19.7	7.58
P12074	Cytochrome c oxidase subunit 6A1, mitochondrial OS=Homo sapiens GN=COX6A1 PE=1 SV=4	26.6055	1	3	1	1	109	12.1	9.32
Q9Y3D6	Mitochondrial fission 1 protein OS=Homo sapiens GN=FIS1 PE=1 SV=2	15.7895	2	2	2	1	152	16.9	8.79
Q9UBQ5	Eukaryotic translation initiation factor 3 subunit K OS=Homo sapiens GN=EIF3K PE=1 SV=1	13.7615	2	3	2	1	218	25	4.93
Q92947	Glutaryl-CoA dehydrogenase, mitochondrial OS=Homo sapiens GN=GCDH PE=1 SV=1	5.93607	1	2	1	1	438	48.1	8.06
Q14103	Heterogeneous nuclear ribonucleoprotein D0 OS=Homo sapiens GN=HNRNPD PE=1 SV=1	7.60563	3	4	2	1	355	38.4	7.81
P50238	Cysteine-rich protein 1 OS=Homo sapiens GN=CRIP1 PE=1 SV=3	48.0519	2	3	2	1	77	8.5	8.75
P08195	Isoform 4 of 4F2 cell-surface antigen heavy chain OS=Homo sapiens GN=SLC3A2	4.68986	2	2	2	1	661	71.1	4.97
Q01844	Isoform 5 of RNA-binding protein EWS OS=Homo sapiens GN=EWSR1	3.47958	2	2	2	1	661	68.9	9.29
P48509	CD151 antigen OS=Homo sapiens GN=CD151 PE=1 SV=3	10.6719	3	3	3	1	253	28.3	7.47
P46060	Ran GTPase-activating protein 1 OS=Homo sapiens GN=RANGAP1 PE=1 SV=1	4.59966	2	2	2	1	587	63.5	4.68
Q8N183	Mimitin, mitochondrial OS=Homo sapiens GN=NDUFAF2 PE=1 SV=1	15.3846	2	3	2	1	169	19.8	8.97
P46977	Dolichyl-diphosphooligosaccharide--protein glycosyltransferase subunit STT3A OS=Homo sapiens GN=STT3A PE=1 SV=2	2.97872	2	2	2	1	705	80.5	8.07
Q5BJD5	Transmembrane protein 41B OS=Homo sapiens GN=TMEM41B PE=1 SV=1	6.52921	1	1	1	1	291	32.5	9.58
P78347	General transcription factor II-I OS=Homo sapiens GN=GTF2I PE=1 SV=2	5.41082	2	2	2	1	998	112.3	6.39
Q5T653	39S ribosomal protein L2, mitochondrial OS=Homo sapiens GN=MRPL2 PE=1 SV=2	8.19672	1	1	1	1	305	33.3	11.3
Q8NFV4	Protein ABHD11 OS=Homo sapiens GN=ABHD11 PE=1 SV=1	6.66667	1	1	1	1	315	34.7	9.48
Q6UW68	Transmembrane protein 205 OS=Homo sapiens GN=TMEM205 PE=1 SV=1	13.7566	2	2	2	1	189	21.2	8.62
Q9NVI7	ATPase family AAA domain-containing protein 3A OS=Homo sapiens GN=ATAD3A PE=1 SV=2	3.94322	2	2	2	1	634	71.3	8.98
Q9NX58	Cell growth-regulating nucleolar protein OS=Homo sapiens GN=LYAR PE=1 SV=2	6.59631	1	2	1	1	379	43.6	9.54
P17568	NADH dehydrogenase [ubiquinone] 1 beta subcomplex subunit 7 OS=Homo sapiens GN=NDUFB7 PE=1 SV=4	20.438	3	3	3	1	137	16.4	8.92
Q9H299	SH3 domain-binding glutamic acid-rich-like protein 3 OS=Homo sapiens GN=SH3BGRL3 PE=1 SV=1	31.1828	2	2	2	1	93	10.4	4.93
Q9BVC5	Ashwin OS=Homo sapiens GN=C2orf49 PE=1 SV=1	11.2069	1	1	1	1	232	25.8	9.74
Q9Y2Q3	Glutathione S-transferase kappa 1 OS=Homo sapiens GN=GSTK1 PE=1 SV=3	7.07965	1	1	1	1	226	25.5	8.41
Q14157	Isoform 5 of Ubiquitin-associated protein 2-like OS=Homo sapiens GN=UBAP2L	2.71739	1	1	1	1	1104	116.6	7.02
O15126	Secretory carrier-associated membrane protein 1 OS=Homo sapiens GN=SCAMP1 PE=1 SV=2	6.80473	1	1	1	1	338	37.9	7.42
Q13363	C-terminal-binding protein 1 OS=Homo sapiens GN=CTBP1 PE=1 SV=2	7.5	1	1	1	1	440	47.5	6.77
P82933	28S ribosomal protein S9, mitochondrial OS=Homo sapiens GN=MRPS9 PE=1 SV=2	6.31313	2	2	2	1	396	45.8	9.51
P01130	Low-density lipoprotein receptor OS=Homo sapiens GN=LDLR PE=1 SV=1	1.86047	1	2	1	1	860	95.3	5.05
Q9UBQ0	Isoform 2 of Vacuolar protein sorting-associated protein 29 OS=Homo sapiens GN=VPS29	13.9785	2	2	2	1	186	20.9	7.05
Q9Y5M8	Signal recognition particle receptor subunit beta OS=Homo sapiens GN=SRPRB PE=1 SV=3	7.01107	1	1	1	1	271	29.7	9.04
O43747	Isoform 2 of AP-1 complex subunit gamma-1 OS=Homo sapiens GN=AP1G1	3.27273	1	1	1	1	825	91.7	6.8
P68036	Isoform 3 of Ubiquitin-conjugating enzyme E2 L3 OS=Homo sapiens GN=UBE2L3	10.3774	1	1	1	1	212	24	8.75
P25205	Isoform 2 of DNA replication licensing factor MCM3 OS=Homo sapiens GN=MCM3	6.56506	2	2	2	1	853	95.8	5.77
Q9Y3D5	28S ribosomal protein S18c, mitochondrial OS=Homo sapiens GN=MRPS18C PE=1 SV=1	13.3803	1	2	1	1	142	15.8	9.55
P61009	Signal peptidase complex subunit 3 OS=Homo sapiens GN=SPCS3 PE=1 SV=1	11.6667	2	2	2	1	180	20.3	8.62
O14949	Cytochrome b-c1 complex subunit 8 OS=Homo sapiens GN=UQCRQ PE=1 SV=4	21.9512	3	3	3	1	82	9.9	10.08
P30086	Phosphatidylethanolamine-binding protein 1 OS=Homo sapiens GN=PEBP1 PE=1 SV=3	17.1123	1	1	1	1	187	21	7.53
O14548	Cytochrome c oxidase subunit 7A-related protein, mitochondrial OS=Homo sapiens GN=COX7A2L PE=1 SV=2	28.9474	1	1	1	1	114	12.6	9.42
P61006	Ras-related protein Rab-8A OS=Homo sapiens GN=RAB8A PE=1 SV=1	14.4928	3	4	1	1	207	23.7	9.07
Q9P0S9	Transmembrane protein 14C OS=Homo sapiens GN=TMEM14C PE=1 SV=1	25.8929	1	1	1	1	112	11.6	9.88
Q9BPW8	Protein NipSnap homolog 1 OS=Homo sapiens GN=NIPSNAP1 PE=1 SV=1	8.4507	1	1	1	1	284	33.3	9.31
P07814	Bifunctional glutamate/proline--tRNA ligase OS=Homo sapiens GN=EPRS PE=1 SV=5	1.65344	1	1	1	1	1512	170.5	7.33
Q9UM00	Calcium load-activated calcium channel OS=Homo sapiens GN=TMCO1 PE=1 SV=1	7.97872	1	1	1	1	188	21.2	9.74
P18031	Tyrosine-protein phosphatase non-receptor type 1 OS=Homo sapiens GN=PTPN1 PE=1 SV=1	4.5977	2	3	2	1	435	49.9	6.27
P53007	Tricarboxylate transport protein, mitochondrial OS=Homo sapiens GN=SLC25A1 PE=1 SV=2	10.9325	3	3	3	1	311	34	9.89
Q09028	Histone-binding protein RBBP4 OS=Homo sapiens GN=RBBP4 PE=1 SV=3	5.88235	2	2	2	1	425	47.6	4.89
P0CG08	Golgi pH regulator B OS=Homo sapiens GN=GPR89B PE=1 SV=1	5.93407	1	1	1	1	455	52.9	9.28
P62316	Small nuclear ribonucleoprotein Sm D2 OS=Homo sapiens GN=SNRPD2 PE=1 SV=1	24.5763	2	2	2	1	118	13.5	9.91
P57737	Isoform 3 of Coronin-7 OS=Homo sapiens GN=CORO7	2.19466	1	1	1	1	1048	114.1	6.33
Q96EY7	Pentatricopeptide repeat domain-containing protein 3, mitochondrial OS=Homo sapiens GN=PTCD3 PE=1 SV=3	4.209	1	2	1	1	689	78.5	6.42
Q7Z4H8	KDEL motif-containing protein 2 OS=Homo sapiens GN=KDELC2 PE=1 SV=2	3.35306	1	1	1	1	507	58.5	8.24
Q9BWS9	Isoform 2 of Chitinase domain-containing protein 1 OS=Homo sapiens GN=CHID1	4.54545	1	1	1	1	418	47.6	8.66
O00629	Importin subunit alpha-3 OS=Homo sapiens GN=KPNA4 PE=1 SV=1	6.33397	1	1	1	1	521	57.9	4.96
Q9UHD9	Ubiquilin-2 OS=Homo sapiens GN=UBQLN2 PE=1 SV=2	2.72436	1	1	1	1	624	65.7	5.22
Q7Z417	Nuclear fragile X mental retardation-interacting protein 2 OS=Homo sapiens GN=NUFIP2 PE=1 SV=1	4.60432	2	2	2	1	695	76.1	8.7
O75787	Renin receptor OS=Homo sapiens GN=ATP6AP2 PE=1 SV=2	8	2	2	2	1	350	39	6.1
Q13813	Isoform 2 of Spectrin alpha chain, non-erythrocytic 1 OS=Homo sapiens GN=SPTAN1	1.21114	2	2	2	1	2477	284.9	5.35
P63000	Isoform B of Ras-related C3 botulinum toxin substrate 1 OS=Homo sapiens GN=RAC1	8.53081	2	2	2	1	211	23.5	8.63
O75531	Barrier-to-autointegration factor OS=Homo sapiens GN=BANF1 PE=1 SV=1	26.9663	1	1	1	1	89	10.1	6.09
Q9NP92	28S ribosomal protein S30, mitochondrial OS=Homo sapiens GN=MRPS30 PE=1 SV=2	4.55581	1	1	1	1	439	50.3	7.97
Q14203	Dynactin subunit 1 OS=Homo sapiens GN=DCTN1 PE=1 SV=3	1.95618	1	1	1	1	1278	141.6	5.81
P04062	Glucosylceramidase OS=Homo sapiens GN=GBA PE=1 SV=3	4.29104	1	1	1	1	536	59.7	7.61
P53004	Biliverdin reductase A OS=Homo sapiens GN=BLVRA PE=1 SV=2	5.74324	1	1	1	1	296	33.4	6.44
Q9ULC3	Ras-related protein Rab-23 OS=Homo sapiens GN=RAB23 PE=1 SV=1	8.01688	1	1	1	1	237	26.6	6.6
P14174	Macrophage migration inhibitory factor OS=Homo sapiens GN=MIF PE=1 SV=4	47.8261	1	1	1	1	115	12.5	7.88
P40925	Isoform 3 of Malate dehydrogenase, cytoplasmic OS=Homo sapiens GN=MDH1	4.82955	1	1	1	1	352	38.6	7.71
Q15642	Cdc42-interacting protein 4 OS=Homo sapiens GN=TRIP10 PE=1 SV=3	3.49418	1	1	1	1	601	68.3	5.73
P07108	Isoform 5 of Acyl-CoA-binding protein OS=Homo sapiens GN=DBI	18.9189	2	2	2	1	148	16.5	9.38
Q9H2D1	Mitochondrial folate transporter/carrier OS=Homo sapiens GN=SLC25A32 PE=1 SV=2	7.93651	1	1	1	1	315	35.4	9.45
P08758	Annexin A5 OS=Homo sapiens GN=ANXA5 PE=1 SV=2	5	1	1	1	1	320	35.9	5.05
Q9BV40	Vesicle-associated membrane protein 8 OS=Homo sapiens GN=VAMP8 PE=1 SV=1	24	2	2	2	1	100	11.4	7.34
P11233	Ras-related protein Ral-A OS=Homo sapiens GN=RALA PE=1 SV=1	12.6214	2	2	1	1	206	23.6	7.11
Q15800	Methylsterol monooxygenase 1 OS=Homo sapiens GN=MSMO1 PE=1 SV=1	4.77816	1	1	1	1	293	35.2	7.23
O14656	Torsin-1A OS=Homo sapiens GN=TOR1A PE=1 SV=1	4.51807	1	1	1	1	332	37.8	6.99
O95168	NADH dehydrogenase [ubiquinone] 1 beta subcomplex subunit 4 OS=Homo sapiens GN=NDUFB4 PE=1 SV=3	13.9535	1	1	1	1	129	15.2	9.85
O75718	Cartilage-associated protein OS=Homo sapiens GN=CRTAP PE=1 SV=1	4.2394	1	1	1	1	401	46.5	5.73
Q8N4V1	Isoform 2 of Membrane magnesium transporter 1 OS=Homo sapiens GN=MMGT1	12.2449	1	1	1	1	196	21.9	9.54
O15270	Serine palmitoyltransferase 2 OS=Homo sapiens GN=SPTLC2 PE=1 SV=1	3.55872	1	1	1	1	562	62.9	7.78
P22087	rRNA 2'-O-methyltransferase fibrillarin OS=Homo sapiens GN=FBL PE=1 SV=2	6.23053	2	2	2	1	321	33.8	10.18
Q13428	Isoform 4 of Treacle protein OS=Homo sapiens GN=TCOF1	1.5748	1	1	1	1	1524	155.8	8.95
Q5RI15	Isoform 2 of Cytochrome c oxidase protein 20 homolog OS=Homo sapiens GN=COX20	10.7692	1	1	1	1	130	14.7	8.81
P18084	Integrin beta-5 OS=Homo sapiens GN=ITGB5 PE=1 SV=1	2.50313	1	1	1	1	799	88	6.06
O95864	Fatty acid desaturase 2 OS=Homo sapiens GN=FADS2 PE=1 SV=1	3.37838	1	1	1	1	444	52.2	8.82
Q6UXH1	Isoform 5 of Cysteine-rich with EGF-like domain protein 2 OS=Homo sapiens GN=CRELD2	5.22388	2	3	2	1	402	43.5	4.79
Q70UQ0	Inhibitor of nuclear factor kappa-B kinase-interacting protein OS=Homo sapiens GN=IKBIP PE=1 SV=1	10.2857	2	2	2	1	350	39.3	9.17
O43760	Isoform 2 of Synaptogyrin-2 OS=Homo sapiens GN=SYNGR2	6.54545	2	2	2	1	275	30.4	9.2
P36551	Oxygen-dependent coproporphyrinogen-III oxidase, mitochondrial OS=Homo sapiens GN=CPOX PE=1 SV=3	4.40529	1	1	1	1	454	50.1	8.25
Q9Y2G5	GDP-fucose protein O-fucosyltransferase 2 OS=Homo sapiens GN=POFUT2 PE=1 SV=3	3.2634	1	2	1	1	429	49.9	6.6
Q6Y7W6	Isoform 2 of PERQ amino acid-rich with GYF domain-containing protein 2 OS=Homo sapiens GN=GIGYF2	2.65152	2	2	2	1	1320	152.3	5.63
P42892	Endothelin-converting enzyme 1 OS=Homo sapiens GN=ECE1 PE=1 SV=2	2.20779	1	1	1	1	770	87.1	5.88
Q9UBC2	Isoform 2 of Epidermal growth factor receptor substrate 15-like 1 OS=Homo sapiens GN=EPS15L1	3.2967	2	3	2	1	910	99.5	5.08
Q6UXD5	Seizure 6-like protein 2 OS=Homo sapiens GN=SEZ6L2 PE=1 SV=2	3.51648	1	1	1	1	910	97.5	4.89
Q8N4Q1	Isoform 2 of Mitochondrial intermembrane space import and assembly protein 40 OS=Homo sapiens GN=CHCHD4	15.4839	1	1	1	1	155	17.4	4.39
Q99805	Transmembrane 9 superfamily member 2 OS=Homo sapiens GN=TM9SF2 PE=1 SV=1	2.26244	1	1	1	1	663	75.7	7.44
O75569	Interferon-inducible double-stranded RNA-dependent protein kinase activator A OS=Homo sapiens GN=PRKRA PE=1 SV=1	6.07029	1	2	1	1	313	34.4	8.41
Q9Y6G9	Cytoplasmic dynein 1 light intermediate chain 1 OS=Homo sapiens GN=DYNC1LI1 PE=1 SV=3	3.63289	1	1	1	1	523	56.5	6.42
P20290	Transcription factor BTF3 OS=Homo sapiens GN=BTF3 PE=1 SV=1	24.7573	2	2	2	1	206	22.2	9.38
P62244	40S ribosomal protein S15a OS=Homo sapiens GN=RPS15A PE=1 SV=2	13.0769	2	2	2	1	130	14.8	10.13
Q99439	Calponin-2 OS=Homo sapiens GN=CNN2 PE=1 SV=4	5.50162	1	1	1	1	309	33.7	7.33
Q14019	Coactosin-like protein OS=Homo sapiens GN=COTL1 PE=1 SV=3	19.0141	1	1	1	1	142	15.9	5.67
Q99538	Legumain OS=Homo sapiens GN=LGMN PE=1 SV=1	3.9261	1	1	1	1	433	49.4	6.55
Q9Y3C0	WASH complex subunit CCDC53 OS=Homo sapiens GN=CCDC53 PE=1 SV=1	9.27835	1	1	1	1	194	21.2	4.46
P15927	Isoform 3 of Replication protein A 32 kDa subunit OS=Homo sapiens GN=RPA2	6.42458	1	1	1	1	358	38.8	8.94
P29373	Cellular retinoic acid-binding protein 2 OS=Homo sapiens GN=CRABP2 PE=1 SV=2	11.5942	1	1	1	1	138	15.7	5.4
Q8NCW5	NAD(P)H-hydrate epimerase OS=Homo sapiens GN=NAXE PE=1 SV=2	6.59722	1	2	1	1	288	31.7	7.66
Q6IAA8	Ragulator complex protein LAMTOR1 OS=Homo sapiens GN=LAMTOR1 PE=1 SV=2	8.07453	1	1	1	1	161	17.7	5.15
Q8N2U0	Transmembrane protein 256 OS=Homo sapiens GN=TMEM256 PE=3 SV=1	24.7788	1	1	1	1	113	11.7	8.94
P09234	U1 small nuclear ribonucleoprotein C OS=Homo sapiens GN=SNRPC PE=1 SV=1	11.3208	1	1	1	1	159	17.4	9.67
Q92575	UBX domain-containing protein 4 OS=Homo sapiens GN=UBXN4 PE=1 SV=2	6.69291	1	1	1	1	508	56.7	6.38
Q15427	Splicing factor 3B subunit 4 OS=Homo sapiens GN=SF3B4 PE=1 SV=1	5.42453	1	1	1	1	424	44.4	8.56
Q9BZG1	Ras-related protein Rab-34 OS=Homo sapiens GN=RAB34 PE=1 SV=1	8.88031	1	1	1	1	259	29	7.88
P22102	Trifunctional purine biosynthetic protein adenosine-3 OS=Homo sapiens GN=GART PE=1 SV=1	1.28713	1	1	1	1	1010	107.7	6.7
O60869	Endothelial differentiation-related factor 1 OS=Homo sapiens GN=EDF1 PE=1 SV=1	10.1351	1	1	1	1	148	16.4	9.95
P38159	RNA-binding motif protein, X chromosome OS=Homo sapiens GN=RBMX PE=1 SV=3	5.37084	2	2	2	1	391	42.3	10.05
Q8TCZ2	Isoform 5 of CD99 antigen-like protein 2 OS=Homo sapiens GN=CD99L2	6.98529	1	1	1	1	272	28.9	5.07
Q9NXG6	Isoform 3 of Transmembrane prolyl 4-hydroxylase OS=Homo sapiens GN=P4HTM	3.73002	1	2	1	1	563	63.1	6.1
P61960	Isoform 2 of Ubiquitin-fold modifier 1 OS=Homo sapiens GN=UFM1	33.9806	1	1	1	1	103	11	8.59
Q9UDW1	Cytochrome b-c1 complex subunit 9 OS=Homo sapiens GN=UQCR10 PE=1 SV=3	38.0952	2	2	2	1	63	7.3	9.47
O75494	Serine/arginine-rich splicing factor 10 OS=Homo sapiens GN=SRSF10 PE=1 SV=1	6.10687	1	2	1	1	262	31.3	11.27
Q12904	Isoform 2 of Aminoacyl tRNA synthase complex-interacting multifunctional protein 1 OS=Homo sapiens GN=AIMP1	5.95238	1	1	1	1	336	37	8.65
Q8N129	Protein canopy homolog 4 OS=Homo sapiens GN=CNPY4 PE=2 SV=1	8.46774	1	1	1	1	248	28.3	4.64
Q13740	CD166 antigen OS=Homo sapiens GN=ALCAM PE=1 SV=2	4.97427	1	1	1	1	583	65.1	6.25
Q9GZS3	WD repeat-containing protein 61 OS=Homo sapiens GN=WDR61 PE=1 SV=1	9.5082	1	1	1	1	305	33.6	5.47
Q8NBJ5	Procollagen galactosyltransferase 1 OS=Homo sapiens GN=COLGALT1 PE=1 SV=1	3.37621	2	2	2	1	622	71.6	7.31
Q7Z2T5	TRMT1-like protein OS=Homo sapiens GN=TRMT1L PE=1 SV=2	3.00136	1	1	1	1	733	81.7	7.88
Q9C005	Protein dpy-30 homolog OS=Homo sapiens GN=DPY30 PE=1 SV=1	16.1616	1	1	1	1	99	11.2	4.88
O00217	NADH dehydrogenase [ubiquinone] iron-sulfur protein 8, mitochondrial OS=Homo sapiens GN=NDUFS8 PE=1 SV=1	9.52381	2	2	2	1	210	23.7	6.34
Q86SX6	Glutaredoxin-related protein 5, mitochondrial OS=Homo sapiens GN=GLRX5 PE=1 SV=2	8.9172	1	2	1	1	157	16.6	6.79
Q9Y2R0	Cytochrome c oxidase assembly factor 3 homolog, mitochondrial OS=Homo sapiens GN=COA3 PE=1 SV=1	17.9245	2	2	2	1	106	11.7	9.6
O43809	Cleavage and polyadenylation specificity factor subunit 5 OS=Homo sapiens GN=NUDT21 PE=1 SV=1	6.60793	1	1	1	1	227	26.2	8.82
Q9UNL2	Isoform 2 of Translocon-associated protein subunit gamma OS=Homo sapiens GN=SSR3	7.07071	1	1	1	1	198	22.6	9.63
Q96A33	Coiled-coil domain-containing protein 47 OS=Homo sapiens GN=CCDC47 PE=1 SV=1	3.51967	1	1	1	1	483	55.8	4.87
Q9NTK5	Obg-like ATPase 1 OS=Homo sapiens GN=OLA1 PE=1 SV=2	3.78788	1	1	1	1	396	44.7	7.81
P15954	Cytochrome c oxidase subunit 7C, mitochondrial OS=Homo sapiens GN=COX7C PE=1 SV=1	38.0952	3	3	3	1	63	7.2	10.27
Q9BWF3	RNA-binding protein 4 OS=Homo sapiens GN=RBM4 PE=1 SV=1	7.69231	1	1	1	1	364	40.3	7.08
Q16850	Lanosterol 14-alpha demethylase OS=Homo sapiens GN=CYP51A1 PE=1 SV=3	2.7833	1	1	1	1	503	56.8	8.53
P30408	Transmembrane 4 L6 family member 1 OS=Homo sapiens GN=TM4SF1 PE=1 SV=1	4.45545	1	2	1	1	202	21.6	4.98
P32004	Neural cell adhesion molecule L1 OS=Homo sapiens GN=L1CAM PE=1 SV=2	1.19332	1	1	1	1	1257	139.9	6.24
Q14739	Lamin-B receptor OS=Homo sapiens GN=LBR PE=1 SV=2	3.08943	1	1	1	1	615	70.7	9.36
Q96K17	Transcription factor BTF3 homolog 4 OS=Homo sapiens GN=BTF3L4 PE=1 SV=1	18.9873	1	1	1	1	158	17.3	6.35
O15533	Isoform 3 of Tapasin OS=Homo sapiens GN=TAPBP	2.57937	1	1	1	1	504	53.9	7.23
Q32MZ4	Leucine-rich repeat flightless-interacting protein 1 OS=Homo sapiens GN=LRRFIP1 PE=1 SV=2	1.73267	1	1	1	1	808	89.2	4.65
Q9GZY8	Mitochondrial fission factor OS=Homo sapiens GN=MFF PE=1 SV=1	7.89474	1	1	1	1	342	38.4	8.95
P09211	Glutathione S-transferase P OS=Homo sapiens GN=GSTP1 PE=1 SV=2	9.52381	1	1	1	1	210	23.3	5.64
O75306	NADH dehydrogenase [ubiquinone] iron-sulfur protein 2, mitochondrial OS=Homo sapiens GN=NDUFS2 PE=1 SV=2	4.31965	2	2	2	1	463	52.5	7.55
P06744	Isoform 2 of Glucose-6-phosphate isomerase OS=Homo sapiens GN=GPI	2.6362	1	1	1	1	569	64.3	8.91
Q9NRX2	39S ribosomal protein L17, mitochondrial OS=Homo sapiens GN=MRPL17 PE=1 SV=1	8.57143	1	1	1	1	175	20	10.11
Q08380	Galectin-3-binding protein OS=Homo sapiens GN=LGALS3BP PE=1 SV=1	2.90598	1	1	1	1	585	65.3	5.27
O60762	Dolichol-phosphate mannosyltransferase subunit 1 OS=Homo sapiens GN=DPM1 PE=1 SV=1	8.46154	1	1	1	1	260	29.6	9.57
Q8N1G4	Leucine-rich repeat-containing protein 47 OS=Homo sapiens GN=LRRC47 PE=1 SV=1	5.48885	1	1	1	1	583	63.4	8.28
Q9NQG5	Regulation of nuclear pre-mRNA domain-containing protein 1B OS=Homo sapiens GN=RPRD1B PE=1 SV=1	9.81595	1	1	1	1	326	36.9	5.97
Q9BQ52	Zinc phosphodiesterase ELAC protein 2 OS=Homo sapiens GN=ELAC2 PE=1 SV=2	2.42131	1	1	1	1	826	92.2	7.9
P60468	Protein transport protein Sec61 subunit beta OS=Homo sapiens GN=SEC61B PE=1 SV=2	21.875	2	2	2	1	96	10	11.56
O43504	Ragulator complex protein LAMTOR5 OS=Homo sapiens GN=LAMTOR5 PE=1 SV=1	21.978	1	1	1	1	91	9.6	4.87
Q5SRD1	Putative mitochondrial import inner membrane translocase subunit Tim23B OS=Homo sapiens GN=TIMM23B PE=5 SV=2	6.61479	1	1	1	1	257	28	9.39
P52594	Isoform 4 of Arf-GAP domain and FG repeat-containing protein 1 OS=Homo sapiens GN=AGFG1	5.82192	2	2	2	1	584	60.7	8.56
O43684	Mitotic checkpoint protein BUB3 OS=Homo sapiens GN=BUB3 PE=1 SV=1	3.96341	1	1	1	1	328	37.1	6.84
Q16540	39S ribosomal protein L23, mitochondrial OS=Homo sapiens GN=MRPL23 PE=1 SV=1	14.3791	1	1	1	1	153	17.8	9.69
Q96HR9	Receptor expression-enhancing protein 6 OS=Homo sapiens GN=REEP6 PE=1 SV=1	7.06522	1	1	1	1	184	20.7	8.56
O00560	Syntenin-1 OS=Homo sapiens GN=SDCBP PE=1 SV=1	7.71812	1	1	1	1	298	32.4	7.53
P57088	Transmembrane protein 33 OS=Homo sapiens GN=TMEM33 PE=1 SV=2	4.8583	1	1	1	1	247	28	9.7
Q14204	Cytoplasmic dynein 1 heavy chain 1 OS=Homo sapiens GN=DYNC1H1 PE=1 SV=5	0.473526	1	1	1	1	4646	532.1	6.4
Q9UFG5	Isoform 2 of UPF0449 protein C19orf25 OS=Homo sapiens GN=C19orf25	12.4224	1	1	1	1	161	17.2	8.21
P62891	60S ribosomal protein L39 OS=Homo sapiens GN=RPL39 PE=1 SV=2	19.6078	1	2	1	1	51	6.4	12.56
Q9UJG1	Isoform 3 of Motile sperm domain-containing protein 1 OS=Homo sapiens GN=MOSPD1	13.5514	1	1	1	1	214	24.1	8.31
Q969N2	GPI transamidase component PIG-T OS=Homo sapiens GN=PIGT PE=1 SV=1	2.59516	1	2	1	1	578	65.7	8.38
P13640	Metallothionein-1G OS=Homo sapiens GN=MT1G PE=1 SV=2	19.3548	1	1	1	1	62	6.1	7.96
P13489	Ribonuclease inhibitor OS=Homo sapiens GN=RNH1 PE=1 SV=2	7.15835	1	2	1	1	461	49.9	4.82
O15031	Plexin-B2 OS=Homo sapiens GN=PLXNB2 PE=1 SV=3	1.52339	1	1	1	1	1838	205	6.24
P04083	Annexin A1 OS=Homo sapiens GN=ANXA1 PE=1 SV=2	6.93642	1	1	1	1	346	38.7	7.02
Q07157	Tight junction protein ZO-1 OS=Homo sapiens GN=TJP1 PE=1 SV=3	1.08696	1	1	1	1	1748	195.3	6.7
O14763	Tumor necrosis factor receptor superfamily member 10B OS=Homo sapiens GN=TNFRSF10B PE=1 SV=2	3.86364	1	1	1	1	440	47.8	5.55
Q9UK45	U6 snRNA-associated Sm-like protein LSm7 OS=Homo sapiens GN=LSM7 PE=1 SV=1	24.2718	1	1	1	1	103	11.6	5.27
Q9Y5U8	Mitochondrial pyruvate carrier 1 OS=Homo sapiens GN=MPC1 PE=1 SV=1	19.2661	1	1	1	1	109	12.3	9.61
P46939	Isoform 2 of Utrophin OS=Homo sapiens GN=UTRN	1.51251	2	2	2	1	3438	394.7	5.38
P82909	28S ribosomal protein S36, mitochondrial OS=Homo sapiens GN=MRPS36 PE=1 SV=2	28.1553	2	2	2	1	103	11.5	9.99
Q99436	Proteasome subunit beta type-7 OS=Homo sapiens GN=PSMB7 PE=1 SV=1	6.85921	1	1	1	1	277	29.9	7.68
Q96G23	Ceramide synthase 2 OS=Homo sapiens GN=CERS2 PE=1 SV=1	4.21053	1	1	1	1	380	44.8	8.98
P00167	Cytochrome b5 OS=Homo sapiens GN=CYB5A PE=1 SV=2	15.6716	1	1	1	1	134	15.3	4.96
Q04637	Isoform 9 of Eukaryotic translation initiation factor 4 gamma 1 OS=Homo sapiens GN=EIF4G1	3.48692	2	2	2	1	1606	176.1	5.34
P51553	Isocitrate dehydrogenase [NAD] subunit gamma, mitochondrial OS=Homo sapiens GN=IDH3G PE=1 SV=1	5.85242	1	1	1	1	393	42.8	8.5
O95302	Isoform 3 of Peptidyl-prolyl cis-trans isomerase FKBP9 OS=Homo sapiens GN=FKBP9	4.17335	3	3	3	1	623	69.1	5.31
Q15149	Plectin OS=Homo sapiens GN=PLEC PE=1 SV=3	0.405636	1	1	1	1	4684	531.5	5.96
P15170	Isoform 3 of Eukaryotic peptide chain release factor GTP-binding subunit ERF3A OS=Homo sapiens GN=GSPT1	5.18053	2	2	2	1	637	68.7	5.33
P05067	Amyloid beta A4 protein OS=Homo sapiens GN=APP PE=1 SV=3	2.5974	2	2	1	1	770	86.9	4.82
Q99536	Synaptic vesicle membrane protein VAT-1 homolog OS=Homo sapiens GN=VAT1 PE=1 SV=2	8.39695	2	2	2	1	393	41.9	6.29
P30154	Isoform 2 of Serine/threonine-protein phosphatase 2A 65 kDa regulatory subunit A beta isoform OS=Homo sapiens GN=PPP2R1B	2.69865	1	1	1	1	667	73.5	5.07
P06703	Protein S100-A6 OS=Homo sapiens GN=S100A6 PE=1 SV=1	24.4444	3	3	3	1	90	10.2	5.48
Q9UMS4	Pre-mRNA-processing factor 19 OS=Homo sapiens GN=PRPF19 PE=1 SV=1	2.97619	1	1	1	1	504	55.1	6.61
O43920	NADH dehydrogenase [ubiquinone] iron-sulfur protein 5 OS=Homo sapiens GN=NDUFS5 PE=1 SV=3	17.9245	2	3	2	1	106	12.5	9.14
O14880	Microsomal glutathione S-transferase 3 OS=Homo sapiens GN=MGST3 PE=1 SV=1	14.4737	1	1	1	1	152	16.5	9.38
O00625	Pirin OS=Homo sapiens GN=PIR PE=1 SV=1	4.13793	1	1	1	1	290	32.1	6.92
Q16881	Thioredoxin reductase 1, cytoplasmic OS=Homo sapiens GN=TXNRD1 PE=1 SV=3	5.547	1	1	1	1	649	70.9	7.39
P24311	Cytochrome c oxidase subunit 7B, mitochondrial OS=Homo sapiens GN=COX7B PE=1 SV=2	10	2	3	2	1	80	9.2	10.27
P03928	ATP synthase protein 8 OS=Homo sapiens GN=MT-ATP8 PE=1 SV=1	13.2353	1	2	1	1	68	8	9.91
O75937	DnaJ homolog subfamily C member 8 OS=Homo sapiens GN=DNAJC8 PE=1 SV=2	11.4625	1	1	1	1	253	29.8	9.06
Q9H490	Phosphatidylinositol glycan anchor biosynthesis class U protein OS=Homo sapiens GN=PIGU PE=1 SV=3	3.90805	1	2	1	1	435	50	7.72
P19022	Cadherin-2 OS=Homo sapiens GN=CDH2 PE=1 SV=4	3.64238	1	1	1	1	906	99.7	4.81
Q9P2R7	Succinate--CoA ligase [ADP-forming] subunit beta, mitochondrial OS=Homo sapiens GN=SUCLA2 PE=1 SV=3	6.2635	2	2	2	1	463	50.3	7.42
P09497	Isoform Non-brain of Clathrin light chain B OS=Homo sapiens GN=CLTB	8.05687	2	2	2	1	211	23.2	4.69
O75821	Eukaryotic translation initiation factor 3 subunit G OS=Homo sapiens GN=EIF3G PE=1 SV=2	5	1	1	1	1	320	35.6	6.13
Q9NRP0	Isoform 2 of Oligosaccharyltransferase complex subunit OSTC OS=Homo sapiens GN=OSTC	7.01754	1	1	1	1	171	19.2	9.19
Q9Y2S7	Polymerase delta-interacting protein 2 OS=Homo sapiens GN=POLDIP2 PE=1 SV=1	9.23913	1	1	1	1	368	42	8.63
Q86TC9	Myopalladin OS=Homo sapiens GN=MYPN PE=1 SV=2	0.984848	1	1	1	1	1320	145.2	6.77
O75879	Glutamyl-tRNA(Gln) amidotransferase subunit B, mitochondrial OS=Homo sapiens GN=GATB PE=1 SV=1	4.48833	1	1	1	1	557	61.8	8.63
P09132	Signal recognition particle 19 kDa protein OS=Homo sapiens GN=SRP19 PE=1 SV=3	10.4167	1	1	1	1	144	16.1	9.85
Q9NUI1	Peroxisomal 2,4-dienoyl-CoA reductase OS=Homo sapiens GN=DECR2 PE=1 SV=1	8.56164	1	1	1	1	292	30.8	9.22
O75027	Isoform 2 of ATP-binding cassette sub-family B member 7, mitochondrial OS=Homo sapiens GN=ABCB7	9.03054	2	2	2	1	753	82.7	9.33
P43307	Translocon-associated protein subunit alpha OS=Homo sapiens GN=SSR1 PE=1 SV=3	6.64336	2	2	2	1	286	32.2	4.49
Q96B49	Mitochondrial import receptor subunit TOM6 homolog OS=Homo sapiens GN=TOMM6 PE=1 SV=1	18.9189	1	1	1	1	74	8	4.89
Q9Y4P3	Transducin beta-like protein 2 OS=Homo sapiens GN=TBL2 PE=1 SV=1	2.46085	1	1	1	1	447	49.8	9.44
P54709	Sodium/potassium-transporting ATPase subunit beta-3 OS=Homo sapiens GN=ATP1B3 PE=1 SV=1	5.01792	1	1	1	1	279	31.5	8.35
Q92900	Regulator of nonsense transcripts 1 OS=Homo sapiens GN=UPF1 PE=1 SV=2	1.59433	1	1	1	1	1129	124.3	6.61
P84090	Enhancer of rudimentary homolog OS=Homo sapiens GN=ERH PE=1 SV=1	16.3462	2	2	2	1	104	12.3	5.92
Q9NQ50	39S ribosomal protein L40, mitochondrial OS=Homo sapiens GN=MRPL40 PE=1 SV=1	8.73786	1	1	1	1	206	24.5	9.63
P63220	40S ribosomal protein S21 OS=Homo sapiens GN=RPS21 PE=1 SV=1	12.0482	1	1	1	1	83	9.1	8.5
O15258	Protein RER1 OS=Homo sapiens GN=RER1 PE=1 SV=1	5.61224	1	1	1	1	196	22.9	9.54
O43143	Pre-mRNA-splicing factor ATP-dependent RNA helicase DHX15 OS=Homo sapiens GN=DHX15 PE=1 SV=2	1.50943	1	1	1	1	795	90.9	7.46
P15924	Desmoplakin OS=Homo sapiens GN=DSP PE=1 SV=3	1.04493	1	1	1	1	2871	331.6	6.81
P50552	Vasodilator-stimulated phosphoprotein OS=Homo sapiens GN=VASP PE=1 SV=3	12.3684	1	1	1	1	380	39.8	8.94
P54577	Tyrosine--tRNA ligase, cytoplasmic OS=Homo sapiens GN=YARS PE=1 SV=4	4.54545	1	1	1	1	528	59.1	7.05
Q96HJ9	Isoform 2 of UPF0562 protein C7orf55 OS=Homo sapiens GN=C7orf55	4.80349	2	2	2	1	458	54.2	10.13
Q9Y624	Junctional adhesion molecule A OS=Homo sapiens GN=F11R PE=1 SV=1	7.69231	1	1	1	1	299	32.6	7.9
P25786	Isoform Long of Proteasome subunit alpha type-1 OS=Homo sapiens GN=PSMA1	11.8959	2	2	2	1	269	30.2	6.99
Q9P2X0	Isoform 2 of Dolichol-phosphate mannosyltransferase subunit 3 OS=Homo sapiens GN=DPM3	8.19672	1	1	1	1	122	13.3	8.35
O95562	Vesicle transport protein SFT2B OS=Homo sapiens GN=SFT2D2 PE=1 SV=1	6.25	1	1	1	1	160	17.8	9.13
P13797	Plastin-3 OS=Homo sapiens GN=PLS3 PE=1 SV=4	4.12698	1	1	1	1	630	70.8	5.6
Q9Y320	Thioredoxin-related transmembrane protein 2 OS=Homo sapiens GN=TMX2 PE=1 SV=1	6.41892	2	2	2	1	296	34	8.69
Q8WUA8	Tsukushin OS=Homo sapiens GN=TSKU PE=2 SV=3	9.34844	1	1	1	1	353	37.8	6.87
P06753	Tropomyosin alpha-3 chain OS=Homo sapiens GN=TPM3 PE=1 SV=2	3.50877	1	1	1	1	285	32.9	4.72
Q9NSD9	Phenylalanine--tRNA ligase beta subunit OS=Homo sapiens GN=FARSB PE=1 SV=3	3.56537	2	2	2	1	589	66.1	6.84
Q9BW72	HIG1 domain family member 2A, mitochondrial OS=Homo sapiens GN=HIGD2A PE=1 SV=1	23.5849	1	1	1	1	106	11.5	10.2
P53992	Protein transport protein Sec24C OS=Homo sapiens GN=SEC24C PE=1 SV=3	1.46252	1	1	1	1	1094	118.2	7.06
P42285	Superkiller viralicidic activity 2-like 2 OS=Homo sapiens GN=SKIV2L2 PE=1 SV=3	2.01536	1	1	1	1	1042	117.7	6.52
Q96HY6	DDRGK domain-containing protein 1 OS=Homo sapiens GN=DDRGK1 PE=1 SV=2	6.05096	1	1	1	1	314	35.6	5.12
Q99417	C-Myc-binding protein OS=Homo sapiens GN=MYCBP PE=1 SV=3	19.4175	1	1	1	1	103	12	5.91
P55884	Isoform 2 of Eukaryotic translation initiation factor 3 subunit B OS=Homo sapiens GN=EIF3B	2.74914	1	1	1	1	873	99	5.08
P62333	26S protease regulatory subunit 10B OS=Homo sapiens GN=PSMC6 PE=1 SV=1	3.85604	1	1	1	1	389	44.1	7.49
Q16831	Uridine phosphorylase 1 OS=Homo sapiens GN=UPP1 PE=1 SV=1	3.22581	1	1	1	1	310	33.9	7.88
Q92520	Protein FAM3C OS=Homo sapiens GN=FAM3C PE=1 SV=1	7.04846	1	1	1	1	227	24.7	8.29
O15143	Actin-related protein 2/3 complex subunit 1B OS=Homo sapiens GN=ARPC1B PE=1 SV=3	3.49462	1	1	1	1	372	40.9	8.35
Q9BRX8	Redox-regulatory protein FAM213A OS=Homo sapiens GN=FAM213A PE=1 SV=3	4.80349	1	1	1	1	229	25.7	8.84
P02545	Prelamin-A/C OS=Homo sapiens GN=LMNA PE=1 SV=1	1.50602	1	1	1	1	664	74.1	7.02
Q96DZ1	Endoplasmic reticulum lectin 1 OS=Homo sapiens GN=ERLEC1 PE=1 SV=1	4.7619	1	1	1	1	483	54.8	6.28
Q9BQB6	Vitamin K epoxide reductase complex subunit 1 OS=Homo sapiens GN=VKORC1 PE=1 SV=1	7.97546	1	1	1	1	163	18.2	9.36
O95298	NADH dehydrogenase [ubiquinone] 1 subunit C2 OS=Homo sapiens GN=NDUFC2 PE=1 SV=1	10.084	1	1	1	1	119	14.2	8.98
Q9NP72	Ras-related protein Rab-18 OS=Homo sapiens GN=RAB18 PE=1 SV=1	5.33981	1	1	1	1	206	23	5.24
A0FGR8	Isoform 6 of Extended synaptotagmin-2 OS=Homo sapiens GN=ESYT2	1.38004	1	1	1	1	942	104.6	9.33
Q9BXK5	Bcl-2-like protein 13 OS=Homo sapiens GN=BCL2L13 PE=1 SV=1	5.36082	1	1	1	1	485	52.7	4.44
Q9Y696	Chloride intracellular channel protein 4 OS=Homo sapiens GN=CLIC4 PE=1 SV=4	7.11462	1	1	1	1	253	28.8	5.59
Q16181	Septin-7 OS=Homo sapiens GN=SEPT7 PE=1 SV=2	5.26316	1	1	1	1	437	50.6	8.63
P37268	Squalene synthase OS=Homo sapiens GN=FDFT1 PE=1 SV=1	5.7554	2	2	2	1	417	48.1	6.54
O15347	High mobility group protein B3 OS=Homo sapiens GN=HMGB3 PE=1 SV=4	6.5	1	1	1	1	200	23	8.37
P82912	28S ribosomal protein S11, mitochondrial OS=Homo sapiens GN=MRPS11 PE=1 SV=2	6.70103	1	1	1	1	194	20.6	10.81
Q6P161	39S ribosomal protein L54, mitochondrial OS=Homo sapiens GN=MRPL54 PE=1 SV=1	18.8406	1	1	1	1	138	15.8	9.6
Q9BYN8	28S ribosomal protein S26, mitochondrial OS=Homo sapiens GN=MRPS26 PE=1 SV=1	9.26829	2	2	2	1	205	24.2	10.39
Q16740	ATP-dependent Clp protease proteolytic subunit, mitochondrial OS=Homo sapiens GN=CLPP PE=1 SV=1	12.2744	1	2	1	1	277	30.2	8.09
Q16555	Dihydropyrimidinase-related protein 2 OS=Homo sapiens GN=DPYSL2 PE=1 SV=1	4.72028	1	1	1	1	572	62.3	6.38
Q9Y520	Isoform 7 of Protein PRRC2C OS=Homo sapiens GN=PRRC2C	0.552105	1	1	1	1	2898	316.9	9.13
P28288	ATP-binding cassette sub-family D member 3 OS=Homo sapiens GN=ABCD3 PE=1 SV=1	1.82094	1	1	1	1	659	75.4	9.36
Q92692	Nectin-2 OS=Homo sapiens GN=NECTIN2 PE=1 SV=1	3.5316	1	1	1	1	538	57.7	4.82
P49721	Proteasome subunit beta type-2 OS=Homo sapiens GN=PSMB2 PE=1 SV=1	5.47264	1	1	1	1	201	22.8	7.02
Q15907	Ras-related protein Rab-11B OS=Homo sapiens GN=RAB11B PE=1 SV=4	5.04587	1	1	1	1	218	24.5	5.94
Q9NUJ1	Mycophenolic acid acyl-glucuronide esterase, mitochondrial OS=Homo sapiens GN=ABHD10 PE=1 SV=1	5.88235	1	1	1	1	306	33.9	8.57
P11234	Isoform 2 of Ras-related protein Ral-B OS=Homo sapiens GN=RALB	8.77193	2	2	1	1	228	26	7.81
P08621	U1 small nuclear ribonucleoprotein 70 kDa OS=Homo sapiens GN=SNRNP70 PE=1 SV=2	5.72082	2	2	2	1	437	51.5	9.94
Q9BU61	NADH dehydrogenase [ubiquinone] 1 alpha subcomplex assembly factor 3 OS=Homo sapiens GN=NDUFAF3 PE=1 SV=1	5.97826	1	1	1	1	184	20.3	8.22
O43493	Trans-Golgi network integral membrane protein 2 OS=Homo sapiens GN=TGOLN2 PE=1 SV=2	2.91667	1	1	1	1	480	51.1	5.73
Q8N4Q0	Zinc-binding alcohol dehydrogenase domain-containing protein 2 OS=Homo sapiens GN=ZADH2 PE=1 SV=1	7.69231	1	1	1	1	377	40.1	8.18
P56381	ATP synthase subunit epsilon, mitochondrial OS=Homo sapiens GN=ATP5E PE=1 SV=2	29.4118	2	2	2	1	51	5.8	9.92
P25685	DnaJ homolog subfamily B member 1 OS=Homo sapiens GN=DNAJB1 PE=1 SV=4	4.41176	2	2	2	1	340	38	8.63
P82979	SAP domain-containing ribonucleoprotein OS=Homo sapiens GN=SARNP PE=1 SV=3	4.7619	1	1	1	1	210	23.7	6.42
Q9UI09	NADH dehydrogenase [ubiquinone] 1 alpha subcomplex subunit 12 OS=Homo sapiens GN=NDUFA12 PE=1 SV=1	11.7241	1	1	1	1	145	17.1	9.63
Q8N111	Cell cycle exit and neuronal differentiation protein 1 OS=Homo sapiens GN=CEND1 PE=2 SV=1	25.5034	2	2	2	1	149	14.9	9.2
Q99700	Ataxin-2 OS=Homo sapiens GN=ATXN2 PE=1 SV=2	1.37091	1	1	1	1	1313	140.2	9.57
Q9Y3D3	28S ribosomal protein S16, mitochondrial OS=Homo sapiens GN=MRPS16 PE=1 SV=1	13.1387	1	1	1	1	137	15.3	9.5
Q9BYC9	39S ribosomal protein L20, mitochondrial OS=Homo sapiens GN=MRPL20 PE=1 SV=1	7.38255	1	1	1	1	149	17.4	10.86
Q5SSJ5	Heterochromatin protein 1-binding protein 3 OS=Homo sapiens GN=HP1BP3 PE=1 SV=1	1.98915	1	1	1	1	553	61.2	9.67
Q7Z2W9	39S ribosomal protein L21, mitochondrial OS=Homo sapiens GN=MRPL21 PE=1 SV=2	4.87805	1	1	1	1	205	22.8	9.89
Q9NZ01	Very-long-chain enoyl-CoA reductase OS=Homo sapiens GN=TECR PE=1 SV=1	3.24675	1	2	1	1	308	36	9.45
O75380	NADH dehydrogenase [ubiquinone] iron-sulfur protein 6, mitochondrial OS=Homo sapiens GN=NDUFS6 PE=1 SV=1	12.0968	1	1	1	1	124	13.7	8.28
O60783	28S ribosomal protein S14, mitochondrial OS=Homo sapiens GN=MRPS14 PE=1 SV=1	10.1562	1	1	1	1	128	15.1	11.41
P02794	Ferritin heavy chain OS=Homo sapiens GN=FTH1 PE=1 SV=2	7.10383	1	1	1	1	183	21.2	5.55
Q15046	Isoform Mitochondrial of Lysine--tRNA ligase OS=Homo sapiens GN=KARS	3.52	1	1	1	1	625	71.5	6.81
Q8IWS0	PHD finger protein 6 OS=Homo sapiens GN=PHF6 PE=1 SV=1	3.0137	1	1	1	1	365	41.3	8.68
O43491	Band 4.1-like protein 2 OS=Homo sapiens GN=EPB41L2 PE=1 SV=1	1.09453	1	1	1	1	1005	112.5	5.44
Q9H9P8	L-2-hydroxyglutarate dehydrogenase, mitochondrial OS=Homo sapiens GN=L2HGDH PE=1 SV=3	2.59179	1	1	1	1	463	50.3	8.15
P05026	Sodium/potassium-transporting ATPase subunit beta-1 OS=Homo sapiens GN=ATP1B1 PE=1 SV=1	8.25083	1	1	1	1	303	35	8.53
Q9Y3D9	28S ribosomal protein S23, mitochondrial OS=Homo sapiens GN=MRPS23 PE=1 SV=2	6.31579	1	1	1	1	190	21.8	8.9
O75439	Mitochondrial-processing peptidase subunit beta OS=Homo sapiens GN=PMPCB PE=1 SV=2	2.24949	1	1	1	1	489	54.3	6.83
P06730	Isoform 2 of Eukaryotic translation initiation factor 4E OS=Homo sapiens GN=EIF4E	3.22581	1	1	1	1	248	28.8	6.42
Q9GZP9	Derlin-2 OS=Homo sapiens GN=DERL2 PE=1 SV=1	12.5523	1	1	1	1	239	27.5	7.28
Q96EL3	39S ribosomal protein L53, mitochondrial OS=Homo sapiens GN=MRPL53 PE=1 SV=1	13.3929	1	1	1	1	112	12.1	8.76
Q9UM22	Mammalian ependymin-related protein 1 OS=Homo sapiens GN=EPDR1 PE=1 SV=2	4.46429	1	1	1	1	224	25.4	6.6
Q13561	Isoform 2 of Dynactin subunit 2 OS=Homo sapiens GN=DCTN2	2.21675	1	1	1	1	406	44.8	5.17
Q9BPX5	Actin-related protein 2/3 complex subunit 5-like protein OS=Homo sapiens GN=ARPC5L PE=1 SV=1	24.8366	1	1	1	1	153	16.9	6.6
P08648	Integrin alpha-5 OS=Homo sapiens GN=ITGA5 PE=1 SV=2	0.953289	1	1	1	1	1049	114.5	5.77
Q96TA1	Niban-like protein 1 OS=Homo sapiens GN=FAM129B PE=1 SV=3	1.74263	1	1	1	1	746	84.1	6.19
Q9UK76	Hematological and neurological expressed 1 protein OS=Homo sapiens GN=HN1 PE=1 SV=3	27.2727	1	1	1	1	154	16	5.6
Q9Y305	Isoform 4 of Acyl-coenzyme A thioesterase 9, mitochondrial OS=Homo sapiens GN=ACOT9	5.58036	1	1	1	1	448	50.8	8.53
P78344	Eukaryotic translation initiation factor 4 gamma 2 OS=Homo sapiens GN=EIF4G2 PE=1 SV=1	2.64609	1	1	1	1	907	102.3	7.14
Q3ZAQ7	Vacuolar ATPase assembly integral membrane protein VMA21 OS=Homo sapiens GN=VMA21 PE=1 SV=1	11.8812	1	1	1	1	101	11.3	7.24
O00154	Cytosolic acyl coenzyme A thioester hydrolase OS=Homo sapiens GN=ACOT7 PE=1 SV=3	2.89474	1	1	1	1	380	41.8	8.54
Q12959	Isoform 2 of Disks large homolog 1 OS=Homo sapiens GN=DLG1	2.05184	1	1	1	1	926	103.3	5.92
O75915	PRA1 family protein 3 OS=Homo sapiens GN=ARL6IP5 PE=1 SV=1	5.85106	1	1	1	1	188	21.6	9.77
Q8IWB7	WD repeat and FYVE domain-containing protein 1 OS=Homo sapiens GN=WDFY1 PE=1 SV=1	2.68293	1	1	1	1	410	46.3	7.33
P32119	Peroxiredoxin-2 OS=Homo sapiens GN=PRDX2 PE=1 SV=5	4.54545	1	1	1	1	198	21.9	5.97
Q8WVM8	Sec1 family domain-containing protein 1 OS=Homo sapiens GN=SCFD1 PE=1 SV=4	4.04984	1	1	1	1	642	72.3	6.27
Q8IVS2	Malonyl-CoA-acyl carrier protein transacylase, mitochondrial OS=Homo sapiens GN=MCAT PE=1 SV=2	5.89744	1	1	1	1	390	42.9	8.72
O95167	NADH dehydrogenase [ubiquinone] 1 alpha subcomplex subunit 3 OS=Homo sapiens GN=NDUFA3 PE=1 SV=1	28.5714	1	1	1	1	84	9.3	8.46
P63218	Guanine nucleotide-binding protein G(I)/G(S)/G(O) subunit gamma-5 OS=Homo sapiens GN=GNG5 PE=1 SV=3	50	2	2	2	1	68	7.3	9.85
P13284	Gamma-interferon-inducible lysosomal thiol reductase OS=Homo sapiens GN=IFI30 PE=1 SV=3	15.2	1	1	1	1	250	27.9	4.88
P08579	U2 small nuclear ribonucleoprotein B'' OS=Homo sapiens GN=SNRPB2 PE=1 SV=1	4.88889	1	1	1	1	225	25.5	9.72
Q9NX40	OCIA domain-containing protein 1 OS=Homo sapiens GN=OCIAD1 PE=1 SV=1	4.08163	1	1	1	1	245	27.6	7.49
P49023	Isoform Gamma of Paxillin OS=Homo sapiens GN=PXN	3.63636	1	1	1	1	605	66.2	6.37
P49406	39S ribosomal protein L19, mitochondrial OS=Homo sapiens GN=MRPL19 PE=1 SV=2	4.79452	1	1	1	1	292	33.5	9.5
Q9UHB6	Isoform 4 of LIM domain and actin-binding protein 1 OS=Homo sapiens GN=LIMA1	2.23684	1	1	1	1	760	85.2	6.76
Q96DE0	U8 snoRNA-decapping enzyme OS=Homo sapiens GN=NUDT16 PE=1 SV=2	9.74359	1	1	1	1	195	21.3	6.89
O75352	Mannose-P-dolichol utilization defect 1 protein OS=Homo sapiens GN=MPDU1 PE=1 SV=2	4.04858	1	1	1	1	247	26.6	8.94
O15235	28S ribosomal protein S12, mitochondrial OS=Homo sapiens GN=MRPS12 PE=1 SV=1	7.24638	1	1	1	1	138	15.2	10.29
Q03518	Antigen peptide transporter 1 OS=Homo sapiens GN=TAP1 PE=1 SV=2	3.83663	1	1	1	1	808	87.2	8.02
O75607	Nucleoplasmin-3 OS=Homo sapiens GN=NPM3 PE=1 SV=3	11.7978	1	1	1	1	178	19.3	4.63
Q15181	Inorganic pyrophosphatase OS=Homo sapiens GN=PPA1 PE=1 SV=2	9.34256	2	2	1	1	289	32.6	5.86
P63208	S-phase kinase-associated protein 1 OS=Homo sapiens GN=SKP1 PE=1 SV=2	7.36196	1	1	1	1	163	18.6	4.54
Q13347	Eukaryotic translation initiation factor 3 subunit I OS=Homo sapiens GN=EIF3I PE=1 SV=1	3.69231	1	1	1	1	325	36.5	5.64
P31151	Protein S100-A7 OS=Homo sapiens GN=S100A7 PE=1 SV=4	19.802	1	1	1	1	101	11.5	6.77
O95782	AP-2 complex subunit alpha-1 OS=Homo sapiens GN=AP2A1 PE=1 SV=3	2.86592	1	1	1	1	977	107.5	7.03
Q99661	Kinesin-like protein KIF2C OS=Homo sapiens GN=KIF2C PE=1 SV=2	3.17241	1	1	1	1	725	81.3	7.83
P51688	N-sulphoglucosamine sulphohydrolase OS=Homo sapiens GN=SGSH PE=1 SV=1	5.37849	1	1	1	1	502	56.7	6.95
P00846	ATP synthase subunit a OS=Homo sapiens GN=MT-ATP6 PE=1 SV=1	4.42478	1	1	1	1	226	24.8	10.1
P61225	Ras-related protein Rap-2b OS=Homo sapiens GN=RAP2B PE=1 SV=1	6.55738	1	1	1	1	183	20.5	4.81
Q9UL25	Ras-related protein Rab-21 OS=Homo sapiens GN=RAB21 PE=1 SV=3	4.88889	1	1	1	1	225	24.3	7.94
P67812	Isoform 3 of Signal peptidase complex catalytic subunit SEC11A OS=Homo sapiens GN=SEC11A	4.32432	1	1	1	1	185	21.4	9.42
Q8TCC3	Isoform 2 of 39S ribosomal protein L30, mitochondrial OS=Homo sapiens GN=MRPL30	5.2356	1	1	1	1	191	21.8	10.07
P29372	DNA-3-methyladenine glycosylase OS=Homo sapiens GN=MPG PE=1 SV=3	7.71812	1	1	1	1	298	32.8	9.57
O43676	NADH dehydrogenase [ubiquinone] 1 beta subcomplex subunit 3 OS=Homo sapiens GN=NDUFB3 PE=1 SV=3	10.2041	1	1	1	1	98	11.4	9.2
Q13492	Phosphatidylinositol-binding clathrin assembly protein OS=Homo sapiens GN=PICALM PE=1 SV=2	4.1411	1	1	1	1	652	70.7	7.9
Q9HD45	Transmembrane 9 superfamily member 3 OS=Homo sapiens GN=TM9SF3 PE=1 SV=2	1.86757	1	1	1	1	589	67.8	7.21
O60784	Isoform 2 of Target of Myb protein 1 OS=Homo sapiens GN=TOM1	2.63692	1	1	1	1	493	53.8	4.74
Q9H008	Phospholysine phosphohistidine inorganic pyrophosphate phosphatase OS=Homo sapiens GN=LHPP PE=1 SV=2	7.77778	1	1	1	1	270	29.1	6.15
P38606	V-type proton ATPase catalytic subunit A OS=Homo sapiens GN=ATP6V1A PE=1 SV=2	6.32091	1	1	1	1	617	68.3	5.52
Q5TGZ0	MICOS complex subunit MIC10 OS=Homo sapiens GN=MINOS1 PE=1 SV=1	10.2564	1	1	1	1	78	8.8	8.5
O75438	Isoform 2 of NADH dehydrogenase [ubiquinone] 1 beta subcomplex subunit 1 OS=Homo sapiens GN=NDUFB1	10.4762	1	1	1	1	105	11.9	8.73
O95816	BAG family molecular chaperone regulator 2 OS=Homo sapiens GN=BAG2 PE=1 SV=1	4.2654	1	1	1	1	211	23.8	6.7
P55010	Eukaryotic translation initiation factor 5 OS=Homo sapiens GN=EIF5 PE=1 SV=2	2.08817	1	1	1	1	431	49.2	5.58
Q9UHA4	Ragulator complex protein LAMTOR3 OS=Homo sapiens GN=LAMTOR3 PE=1 SV=1	8.06452	1	1	1	1	124	13.6	7.34
Q9UMX5	Neudesin OS=Homo sapiens GN=NENF PE=1 SV=1	6.39535	1	1	1	1	172	18.8	5.69
P55036	26S proteasome non-ATPase regulatory subunit 4 OS=Homo sapiens GN=PSMD4 PE=1 SV=1	3.97878	1	1	1	1	377	40.7	4.79
Q9Y5J9	Mitochondrial import inner membrane translocase subunit Tim8 B OS=Homo sapiens GN=TIMM8B PE=1 SV=1	9.63855	1	1	1	1	83	9.3	5.12
P48556	26S proteasome non-ATPase regulatory subunit 8 OS=Homo sapiens GN=PSMD8 PE=1 SV=2	8.85714	1	1	1	1	350	39.6	9.7
Q9BT09	Protein canopy homolog 3 OS=Homo sapiens GN=CNPY3 PE=1 SV=1	4.31655	1	1	1	1	278	30.7	5.49
P81605	Isoform 2 of Dermcidin OS=Homo sapiens GN=DCD	9.09091	1	1	1	1	121	12.4	7.97
O75381	Peroxisomal membrane protein PEX14 OS=Homo sapiens GN=PEX14 PE=1 SV=1	5.57029	2	2	2	1	377	41.2	4.94
Q9Y2T2	AP-3 complex subunit mu-1 OS=Homo sapiens GN=AP3M1 PE=1 SV=1	4.78469	1	1	1	1	418	46.9	6.93
Q5UCC4	ER membrane protein complex subunit 10 OS=Homo sapiens GN=EMC10 PE=1 SV=1	3.05344	1	1	1	1	262	27.3	6.13
O14908	PDZ domain-containing protein GIPC1 OS=Homo sapiens GN=GIPC1 PE=1 SV=2	5.10511	1	1	1	1	333	36	6.28
P49792	E3 SUMO-protein ligase RanBP2 OS=Homo sapiens GN=RANBP2 PE=1 SV=2	0.744417	2	2	1	1	3224	358	6.2
Q16563	Synaptophysin-like protein 1 OS=Homo sapiens GN=SYPL1 PE=1 SV=1	4.2471	1	1	1	1	259	28.5	8.43
Q96RT1	Isoform 8 of Erbin OS=Homo sapiens GN=ERBIN	1.55039	1	1	1	1	1419	158.9	5.63
O14745	Na(+)/H(+) exchange regulatory cofactor NHE-RF1 OS=Homo sapiens GN=SLC9A3R1 PE=1 SV=4	3.91061	1	1	1	1	358	38.8	5.77
O95487	Isoform 3 of Protein transport protein Sec24B OS=Homo sapiens GN=SEC24B	0.847458	1	1	1	1	1298	140.3	6.57
P17980	26S protease regulatory subunit 6A OS=Homo sapiens GN=PSMC3 PE=1 SV=3	3.41686	1	1	1	1	439	49.2	5.24
Q14320	Protein FAM50A OS=Homo sapiens GN=FAM50A PE=1 SV=2	4.71976	1	1	1	1	339	40.2	6.83
Q8WU90	Zinc finger CCCH domain-containing protein 15 OS=Homo sapiens GN=ZC3H15 PE=1 SV=1	3.28638	1	1	1	1	426	48.6	5.31
P62861	40S ribosomal protein S30 OS=Homo sapiens GN=FAU PE=1 SV=1	16.9492	1	1	1	1	59	6.6	12.15
Q10471	Polypeptide N-acetylgalactosaminyltransferase 2 OS=Homo sapiens GN=GALNT2 PE=1 SV=1	1.92644	1	1	1	1	571	64.7	8.35
O00483	Cytochrome c oxidase subunit NDUFA4 OS=Homo sapiens GN=NDUFA4 PE=1 SV=1	22.2222	2	2	2	1	81	9.4	9.38
O00291	Huntingtin-interacting protein 1 OS=Homo sapiens GN=HIP1 PE=1 SV=5	1.92864	1	1	1	1	1037	116.1	5.3
Q8WXF1	Paraspeckle component 1 OS=Homo sapiens GN=PSPC1 PE=1 SV=1	4.39771	1	1	1	1	523	58.7	6.67
Q13185	Chromobox protein homolog 3 OS=Homo sapiens GN=CBX3 PE=1 SV=4	6.55738	1	1	1	1	183	20.8	5.33
P60602	Reactive oxygen species modulator 1 OS=Homo sapiens GN=ROMO1 PE=1 SV=1	10.1266	1	1	1	1	79	8.2	9.33
P61011	Signal recognition particle 54 kDa protein OS=Homo sapiens GN=SRP54 PE=1 SV=1	1.98413	1	1	1	1	504	55.7	8.75
Q5JTJ3	Isoform 2 of Cytochrome c oxidase assembly factor 6 homolog OS=Homo sapiens GN=COA6	8.33333	1	1	1	1	156	18.1	10.1
A8K5M9	Uncharacterized protein C15orf62, mitochondrial OS=Homo sapiens GN=C15orf62 PE=2 SV=1	14.2857	1	1	1	1	175	19.7	8.5
Q96AQ6	Pre-B-cell leukemia transcription factor-interacting protein 1 OS=Homo sapiens GN=PBXIP1 PE=1 SV=1	2.05198	1	1	1	1	731	80.6	5.33
P30533	Alpha-2-macroglobulin receptor-associated protein OS=Homo sapiens GN=LRPAP1 PE=1 SV=1	2.2409	1	1	1	1	357	41.4	8.78
Q5T0D9	Tumor protein p63-regulated gene 1-like protein OS=Homo sapiens GN=TPRG1L PE=1 SV=1	13.9706	1	1	1	1	272	30.2	7.34
Q9P0U1	Mitochondrial import receptor subunit TOM7 homolog OS=Homo sapiens GN=TOMM7 PE=1 SV=1	30.9091	1	1	1	1	55	6.2	10.29
Q9Y6M9	NADH dehydrogenase [ubiquinone] 1 beta subcomplex subunit 9 OS=Homo sapiens GN=NDUFB9 PE=1 SV=3	5.02793	1	1	1	1	179	21.8	8.38
P63279	SUMO-conjugating enzyme UBC9 OS=Homo sapiens GN=UBE2I PE=1 SV=1	6.32911	1	1	1	1	158	18	8.66
P08240	Signal recognition particle receptor subunit alpha OS=Homo sapiens GN=SRPRA PE=1 SV=2	3.29154	1	1	1	1	638	69.8	8.95
Q15370	Isoform 2 of Transcription elongation factor B polypeptide 2 OS=Homo sapiens GN=TCEB2	15.528	1	1	1	1	161	17.9	6.1
P62273	40S ribosomal protein S29 OS=Homo sapiens GN=RPS29 PE=1 SV=2	14.2857	1	1	1	1	56	6.7	10.13
Q6ZSM3	Monocarboxylate transporter 12 OS=Homo sapiens GN=SLC16A12 PE=1 SV=2	5.76132	1	1	1	1	486	53	8.12
P23786	Carnitine O-palmitoyltransferase 2, mitochondrial OS=Homo sapiens GN=CPT2 PE=1 SV=2	2.27964	1	1	1	1	658	73.7	8.18
O14672	Disintegrin and metalloproteinase domain-containing protein 10 OS=Homo sapiens GN=ADAM10 PE=1 SV=1	1.87166	1	1	1	1	748	84.1	7.77
Q9NW68	Isoform 3 of BSD domain-containing protein 1 OS=Homo sapiens GN=BSDC1	5.27426	1	1	1	1	474	51.1	4.55
Q4VC31	Coiled-coil domain-containing protein 58 OS=Homo sapiens GN=CCDC58 PE=1 SV=1	7.63889	1	1	1	1	144	16.6	7.81
Q02978	Mitochondrial 2-oxoglutarate/malate carrier protein OS=Homo sapiens GN=SLC25A11 PE=1 SV=3	2.86624	1	1	1	1	314	34	9.91
Q9Y2R9	28S ribosomal protein S7, mitochondrial OS=Homo sapiens GN=MRPS7 PE=1 SV=2	4.95868	1	1	1	1	242	28.1	9.99
Q9H9J2	39S ribosomal protein L44, mitochondrial OS=Homo sapiens GN=MRPL44 PE=1 SV=1	3.91566	1	1	1	1	332	37.5	8.4
P82914	28S ribosomal protein S15, mitochondrial OS=Homo sapiens GN=MRPS15 PE=1 SV=1	3.89105	1	1	1	1	257	29.8	10.48
Q7L9B9	Endonuclease/exonuclease/phosphatase family domain-containing protein 1 OS=Homo sapiens GN=EEPD1 PE=1 SV=2	4.56942	1	1	1	1	569	62.4	8.41
P30405	Peptidyl-prolyl cis-trans isomerase F, mitochondrial OS=Homo sapiens GN=PPIF PE=1 SV=1	6.76329	2	2	1	1	207	22	9.38
P28070	Proteasome subunit beta type-4 OS=Homo sapiens GN=PSMB4 PE=1 SV=4	3.78788	1	1	1	1	264	29.2	5.97
Q13637	Ras-related protein Rab-32 OS=Homo sapiens GN=RAB32 PE=1 SV=3	6.22222	1	1	1	1	225	25	6.54
Q15643	Thyroid receptor-interacting protein 11 OS=Homo sapiens GN=TRIP11 PE=1 SV=3	2.42547	1	1	1	1	1979	227.4	5.26
Q8NBX0	Saccharopine dehydrogenase-like oxidoreductase OS=Homo sapiens GN=SCCPDH PE=1 SV=1	1.8648	1	1	1	1	429	47.1	9.14
Q7L0Y3	Mitochondrial ribonuclease P protein 1 OS=Homo sapiens GN=TRMT10C PE=1 SV=2	4.4665	1	1	1	1	403	47.3	9.36
P07741	Adenine phosphoribosyltransferase OS=Homo sapiens GN=APRT PE=1 SV=2	7.22222	1	1	1	1	180	19.6	6.02
P20645	Cation-dependent mannose-6-phosphate receptor OS=Homo sapiens GN=M6PR PE=1 SV=1	2.88809	1	1	1	1	277	31	5.83
P62995	Transformer-2 protein homolog beta OS=Homo sapiens GN=TRA2B PE=1 SV=1	3.125	1	1	1	1	288	33.6	11.25
O00115	Deoxyribonuclease-2-alpha OS=Homo sapiens GN=DNASE2 PE=1 SV=2	3.33333	1	1	1	1	360	39.6	8.05
P82932	28S ribosomal protein S6, mitochondrial OS=Homo sapiens GN=MRPS6 PE=1 SV=3	6.4	1	1	1	1	125	14.2	9.26
P25789	Proteasome subunit alpha type-4 OS=Homo sapiens GN=PSMA4 PE=1 SV=1	3.06513	1	1	1	1	261	29.5	7.72
Q8WXE9	Isoform 2 of Stonin-2 OS=Homo sapiens GN=STON2	0.978261	1	1	1	1	920	102.8	5.5
Q9BUN8	Derlin-1 OS=Homo sapiens GN=DERL1 PE=1 SV=1	4.38247	1	1	1	1	251	28.8	9.51
P55265	Isoform 4 of Double-stranded RNA-specific adenosine deaminase OS=Homo sapiens GN=ADAR	1.65485	1	1	1	1	1269	140.7	8.56
P51172	Isoform 2 of Amiloride-sensitive sodium channel subunit delta OS=Homo sapiens GN=SCNN1D	1.27841	1	1	1	1	704	77.4	8.27
P09669	Cytochrome c oxidase subunit 6C OS=Homo sapiens GN=COX6C PE=1 SV=2	10.6667	1	1	1	1	75	8.8	10.39
P27144	Adenylate kinase 4, mitochondrial OS=Homo sapiens GN=AK4 PE=1 SV=1	4.93274	1	1	1	1	223	25.3	8.4
Q86Y82	Syntaxin-12 OS=Homo sapiens GN=STX12 PE=1 SV=1	5.43478	1	1	1	1	276	31.6	5.59
Q9NZP5	Olfactory receptor 5AC2 OS=Homo sapiens GN=OR5AC2 PE=3 SV=2	2.26537	1	1	1	1	309	35.3	8.94
Q9BTV4	Transmembrane protein 43 OS=Homo sapiens GN=TMEM43 PE=1 SV=1	2	1	1	1	1	400	44.8	8.13
P51809	Isoform 2 of Vesicle-associated membrane protein 7 OS=Homo sapiens GN=VAMP7	3.46154	1	1	1	1	260	30.2	8.37
P28066	Proteasome subunit alpha type-5 OS=Homo sapiens GN=PSMA5 PE=1 SV=3	4.14938	1	1	1	1	241	26.4	4.79
Q12906	Isoform 7 of Interleukin enhancer-binding factor 3 OS=Homo sapiens GN=ILF3	3.45212	1	1	1	1	898	95.7	8.81
Q96I59	Probable asparagine--tRNA ligase, mitochondrial OS=Homo sapiens GN=NARS2 PE=1 SV=3	6.07966	1	1	1	1	477	54.1	7.24
Q00005	Isoform 2 of Serine/threonine-protein phosphatase 2A 55 kDa regulatory subunit B beta isoform OS=Homo sapiens GN=PPP2R2B	11.2108	1	1	1	1	446	52	7.02
Q86WC4	Osteopetrosis-associated transmembrane protein 1 OS=Homo sapiens GN=OSTM1 PE=1 SV=1	4.49102	1	1	1	1	334	37.2	6.01
O60231	Putative pre-mRNA-splicing factor ATP-dependent RNA helicase DHX16 OS=Homo sapiens GN=DHX16 PE=1 SV=2	0.67243	1	1	1	1	1041	119.2	6.8
P04234	T-cell surface glycoprotein CD3 delta chain OS=Homo sapiens GN=CD3D PE=1 SV=1	30.9942	1	1	1	1	171	18.9	5.54
Q9BUJ2	Heterogeneous nuclear ribonucleoprotein U-like protein 1 OS=Homo sapiens GN=HNRNPUL1 PE=1 SV=2	2.57009	1	1	1	1	856	95.7	6.92
Q9BR46	Putative uncharacterized protein C20orf78 OS=Homo sapiens GN=C20orf78 PE=4 SV=1	6.62252	1	1	1	1	151	17.2	8.81
Q92979	Ribosomal RNA small subunit methyltransferase NEP1 OS=Homo sapiens GN=EMG1 PE=1 SV=4	4.91803	1	1	1	1	244	26.7	9.17
Q96I23	Protein preY, mitochondrial OS=Homo sapiens GN=PYURF PE=1 SV=1	19.2982	1	1	1	1	114	12.6	9.33
Q8NDM7	Cilia- and flagella-associated protein 43 OS=Homo sapiens GN=CFAP43 PE=2 SV=3	0.660661	1	1	1	1	1665	191.9	5.99
O14974	Protein phosphatase 1 regulatory subunit 12A OS=Homo sapiens GN=PPP1R12A PE=1 SV=1	2.13592	1	1	1	1	1030	115.2	5.4
Q969V3	Nicalin OS=Homo sapiens GN=NCLN PE=1 SV=2	3.73002	1	1	1	1	563	62.9	6.89
Q96K76	Ubiquitin carboxyl-terminal hydrolase 47 OS=Homo sapiens GN=USP47 PE=1 SV=3	0.509091	1	1	1	1	1375	157.2	5.08
Q10713	Mitochondrial-processing peptidase subunit alpha OS=Homo sapiens GN=PMPCA PE=1 SV=2	2.09524	1	1	1	1	525	58.2	6.92
Q96FQ6	Protein S100-A16 OS=Homo sapiens GN=S100A16 PE=1 SV=1	10.6796	1	1	1	1	103	11.8	6.79
Q8NEB9	Phosphatidylinositol 3-kinase catalytic subunit type 3 OS=Homo sapiens GN=PIK3C3 PE=1 SV=1	0.676437	1	1	1	1	887	101.5	6.81
Q9NRG7	Epimerase family protein SDR39U1 OS=Homo sapiens GN=SDR39U1 PE=1 SV=2	5.01567	1	1	1	1	319	34.7	9.77
Q86SF2	N-acetylgalactosaminyltransferase 7 OS=Homo sapiens GN=GALNT7 PE=1 SV=1	1.21766	1	1	1	1	657	75.3	7.11
Q05397	Isoform 5 of Focal adhesion kinase 1 OS=Homo sapiens GN=PTK2	0.657277	1	1	1	1	1065	120.8	6.74
O76021	Ribosomal L1 domain-containing protein 1 OS=Homo sapiens GN=RSL1D1 PE=1 SV=3	2.65306	1	1	1	1	490	54.9	10.13
Q6NUP7	Serine/threonine-protein phosphatase 4 regulatory subunit 4 OS=Homo sapiens GN=PPP4R4 PE=1 SV=1	0.687285	1	1	1	1	873	99.4	7.8
Q7Z5H4	Vomeronasal type-1 receptor 5 OS=Homo sapiens GN=VN1R5 PE=2 SV=2	1.96078	1	1	1	1	357	40.8	9.2
Q8N4H5	Isoform 2 of Mitochondrial import receptor subunit TOM5 homolog OS=Homo sapiens GN=TOMM5	7.6087	1	1	1	1	92	10	6.51
P82675	28S ribosomal protein S5, mitochondrial OS=Homo sapiens GN=MRPS5 PE=1 SV=2	3.25581	1	1	1	1	430	48	9.92
Q9P0J0	Isoform 2 of NADH dehydrogenase [ubiquinone] 1 alpha subcomplex subunit 13 OS=Homo sapiens GN=NDUFA13	5.85586	1	2	1	1	222	24.9	9.7
Q8N0U8	Isoform 2 of Vitamin K epoxide reductase complex subunit 1-like protein 1 OS=Homo sapiens GN=VKORC1L1	5.64972	1	1	1	1	177	19.7	8.65
Q9HBH5	Retinol dehydrogenase 14 OS=Homo sapiens GN=RDH14 PE=1 SV=1	2.38095	1	1	1	1	336	36.8	8.79
Q9H8Y8	Isoform 3 of Golgi reassembly-stacking protein 2 OS=Homo sapiens GN=GORASP2	1.72414	1	1	1	1	464	48.6	4.84
P12004	Proliferating cell nuclear antigen OS=Homo sapiens GN=PCNA PE=1 SV=1	3.06513	1	1	1	1	261	28.8	4.69
O95793	Double-stranded RNA-binding protein Staufen homolog 1 OS=Homo sapiens GN=STAU1 PE=1 SV=2	1.7331	1	1	1	1	577	63.1	9.44
P35580	Isoform 4 of Myosin-10 OS=Homo sapiens GN=MYH10	0.398605	1	1	1	1	2007	232.4	5.55
Q8N983	Isoform 6 of 39S ribosomal protein L43, mitochondrial OS=Homo sapiens GN=MRPL43	2.68199	1	1	1	1	261	28.7	8.29
Q14498	RNA-binding protein 39 OS=Homo sapiens GN=RBM39 PE=1 SV=2	2.07547	1	1	1	1	530	59.3	10.1
P00414	Cytochrome c oxidase subunit 3 OS=Homo sapiens GN=MT-CO3 PE=1 SV=2	5.36398	1	1	1	1	261	29.9	7.31
Q9Y666	Solute carrier family 12 member 7 OS=Homo sapiens GN=SLC12A7 PE=1 SV=3	2.12373	1	1	1	1	1083	119	6.71
P61160	Isoform 2 of Actin-related protein 2 OS=Homo sapiens GN=ACTR2	1.50376	1	1	1	1	399	45.3	7.2
Q9ULI4	Kinesin-like protein KIF26A OS=Homo sapiens GN=KIF26A PE=1 SV=3	0.31881	1	1	1	1	1882	194.5	8.81
Q8TEB7	E3 ubiquitin-protein ligase RNF128 OS=Homo sapiens GN=RNF128 PE=1 SV=1	5.37383	1	2	1	1	428	46.5	6.35
O14910	Protein lin-7 homolog A OS=Homo sapiens GN=LIN7A PE=1 SV=2	4.29185	1	1	1	1	233	26	8.72
Q13438	Protein OS-9 OS=Homo sapiens GN=OS9 PE=1 SV=1	1.1994	1	1	1	1	667	75.5	4.87
Q8IY21	Probable ATP-dependent RNA helicase DDX60 OS=Homo sapiens GN=DDX60 PE=1 SV=3	1.0514	1	1	1	1	1712	197.7	7.59
Q13308	Isoform 6 of Inactive tyrosine-protein kinase 7 OS=Homo sapiens GN=PTK7	0.834879	1	1	1	1	1078	119.1	6.96
Q1KMD3	Heterogeneous nuclear ribonucleoprotein U-like protein 2 OS=Homo sapiens GN=HNRNPUL2 PE=1 SV=1	2.94511	1	1	1	1	747	85.1	4.91
Q8N4N3	Kelch-like protein 36 OS=Homo sapiens GN=KLHL36 PE=1 SV=1	1.78571	1	1	1	1	616	69.9	6.24
P09848	Lactase-phlorizin hydrolase OS=Homo sapiens GN=LCT PE=1 SV=3	2.12766	1	1	1	1	1927	218.5	6.34
O14737	Isoform 2 of Programmed cell death protein 5 OS=Homo sapiens GN=PDCD5	10.0775	1	1	1	1	129	15	6.93
Q5H9R4	Armadillo repeat-containing X-linked protein 4 OS=Homo sapiens GN=ARMCX4 PE=2 SV=2	1.66667	1	1	1	1	360	39.4	9.19
P0CH98	Putative protein FAM106C OS=Homo sapiens GN=FAM106CP PE=5 SV=1	13.0178	1	1	1	1	169	18.7	6.04
Q96A57	Isoform 1 of Transmembrane protein 230 OS=Homo sapiens GN=TMEM230	6.01093	1	1	1	1	183	19.9	9.22
Q9Y4K1	Absent in melanoma 1 protein OS=Homo sapiens GN=AIM1 PE=1 SV=3	0.406268	1	1	1	1	1723	188.6	5.86
Q9BYD1	39S ribosomal protein L13, mitochondrial OS=Homo sapiens GN=MRPL13 PE=1 SV=1	4.49438	1	1	1	1	178	20.7	9.16
P22459	Potassium voltage-gated channel subfamily A member 4 OS=Homo sapiens GN=KCNA4 PE=1 SV=2	6.43185	1	1	1	1	653	73.2	5.17
Q15041	ADP-ribosylation factor-like protein 6-interacting protein 1 OS=Homo sapiens GN=ARL6IP1 PE=1 SV=2	2.95567	1	1	1	1	203	23.3	9.32
Q9Y239	Nucleotide-binding oligomerization domain-containing protein 1 OS=Homo sapiens GN=NOD1 PE=1 SV=1	0.734523	1	1	1	1	953	107.6	7.11
O60942	mRNA-capping enzyme OS=Homo sapiens GN=RNGTT PE=1 SV=1	2.01005	1	1	1	1	597	68.5	8.13
Q7Z4H3	HD domain-containing protein 2 OS=Homo sapiens GN=HDDC2 PE=1 SV=1	2.94118	1	1	1	1	204	23.4	5.49
Q9Y255	PRELI domain-containing protein 1, mitochondrial OS=Homo sapiens GN=PRELID1 PE=1 SV=1	3.19635	1	2	1	1	219	25.2	9.54
Q8NB16	Mixed lineage kinase domain-like protein OS=Homo sapiens GN=MLKL PE=1 SV=1	1.4862	1	1	1	1	471	54.4	8.82
Q96A72	Protein mago nashi homolog 2 OS=Homo sapiens GN=MAGOHB PE=1 SV=1	13.5135	1	1	1	1	148	17.3	6.39
Q99928	Gamma-aminobutyric acid receptor subunit gamma-3 OS=Homo sapiens GN=GABRG3 PE=2 SV=2	2.78373	1	1	1	1	467	54.3	7.52
O94808	Glutamine--fructose-6-phosphate aminotransferase [isomerizing] 2 OS=Homo sapiens GN=GFPT2 PE=1 SV=3	1.31965	1	1	1	1	682	76.9	7.37
A8MWD9	Putative small nuclear ribonucleoprotein G-like protein 15 OS=Homo sapiens GN=SNRPGP15 PE=5 SV=2	9.21053	1	1	1	1	76	8.5	8.84
O15078	Centrosomal protein of 290 kDa OS=Homo sapiens GN=CEP290 PE=1 SV=2	0.242033	1	1	1	1	2479	290.2	5.95
O75643	U5 small nuclear ribonucleoprotein 200 kDa helicase OS=Homo sapiens GN=SNRNP200 PE=1 SV=2	0.421348	1	1	1	1	2136	244.4	6.06
P14678	Isoform SM-B1 of Small nuclear ribonucleoprotein-associated proteins B and B' OS=Homo sapiens GN=SNRPB	2.42215	1	1	1	1	289	30	10.18
P14868	Aspartate--tRNA ligase, cytoplasmic OS=Homo sapiens GN=DARS PE=1 SV=2	1.39721	1	1	1	1	501	57.1	6.55
Q9NY26	Zinc transporter ZIP1 OS=Homo sapiens GN=SLC39A1 PE=1 SV=1	2.16049	1	1	1	1	324	34.2	5.92
Q8NHQ1	Isoform 5 of Centrosomal protein of 70 kDa OS=Homo sapiens GN=CEP70	5.71924	1	1	1	1	577	67.5	5.62
O75822	Eukaryotic translation initiation factor 3 subunit J OS=Homo sapiens GN=EIF3J PE=1 SV=2	4.26357	1	1	1	1	258	29	4.83
O15511	Isoform 2 of Actin-related protein 2/3 complex subunit 5 OS=Homo sapiens GN=ARPC5	12.3377	1	1	1	1	154	16.6	6.02
Q9Y2Q9	28S ribosomal protein S28, mitochondrial OS=Homo sapiens GN=MRPS28 PE=1 SV=1	5.88235	1	1	1	1	187	20.8	9.1
Q9UPS8	Isoform 3 of Ankyrin repeat domain-containing protein 26 OS=Homo sapiens GN=ANKRD26	0.409357	1	1	1	1	1710	196.3	5.72
Q9NVI1	Fanconi anemia group I protein OS=Homo sapiens GN=FANCI PE=1 SV=4	0.903614	1	1	1	1	1328	149.2	6.74
P62072	Mitochondrial import inner membrane translocase subunit Tim10 OS=Homo sapiens GN=TIMM10 PE=1 SV=1	7.77778	1	1	1	1	90	10.3	6.29
Q5JYT7	Uncharacterized protein KIAA1755 OS=Homo sapiens GN=KIAA1755 PE=2 SV=2	0.583333	1	1	1	1	1200	130.8	6.37
Q9Y5X3	Sorting nexin-5 OS=Homo sapiens GN=SNX5 PE=1 SV=1	2.9703	1	1	1	1	404	46.8	6.76
Q99490	Arf-GAP with GTPase, ANK repeat and PH domain-containing protein 2 OS=Homo sapiens GN=AGAP2 PE=1 SV=2	0.671141	1	1	1	1	1192	124.6	9.89
Q9BVC6	Transmembrane protein 109 OS=Homo sapiens GN=TMEM109 PE=1 SV=1	4.11523	1	1	1	1	243	26.2	10.48
Q7Z5L2	Coiled-coil domain-containing protein R3HCC1L OS=Homo sapiens GN=R3HCC1L PE=1 SV=2	0.757576	1	1	1	1	792	87.8	5.12
Q99758	ATP-binding cassette sub-family A member 3 OS=Homo sapiens GN=ABCA3 PE=1 SV=2	1.64319	1	1	1	1	1704	191.2	7.62
Q96S97	Myeloid-associated differentiation marker OS=Homo sapiens GN=MYADM PE=1 SV=2	1.86335	1	1	1	1	322	35.3	8.15
O60306	Intron-binding protein aquarius OS=Homo sapiens GN=AQR PE=1 SV=4	0.538721	1	1	1	1	1485	171.2	6.37
Q8WZ422	Isoform 12 of Titin OS=Homo sapiens GN=TTN	0.0222278	1	1	1	1	35991	3992.1	6.39
P43308	Translocon-associated protein subunit beta OS=Homo sapiens GN=SSR2 PE=1 SV=1	3.27869	1	1	1	1	183	20.1	8.35
Q8WW59	SPRY domain-containing protein 4 OS=Homo sapiens GN=SPRYD4 PE=1 SV=2	12.5604	1	1	1	1	207	23.1	6.93
Q8NBQ5	Estradiol 17-beta-dehydrogenase 11 OS=Homo sapiens GN=HSD17B11 PE=1 SV=3	2.66667	1	1	1	1	300	32.9	9.07
Q96T17	Isoform 2 of MAP7 domain-containing protein 2 OS=Homo sapiens GN=MAP7D2	0.905563	1	1	1	1	773	86.3	8.9
P62318	Small nuclear ribonucleoprotein Sm D3 OS=Homo sapiens GN=SNRPD3 PE=1 SV=1	7.14286	1	1	1	1	126	13.9	10.32
O60307	Microtubule-associated serine/threonine-protein kinase 3 OS=Homo sapiens GN=MAST3 PE=1 SV=2	1.45149	1	1	1	1	1309	143	8.06
Q9P2H0	Centrosomal protein of 126 kDa OS=Homo sapiens GN=CEP126 PE=1 SV=3	0.537153	1	1	1	1	1117	125.8	8.76
Q14694	Isoform 2 of Ubiquitin carboxyl-terminal hydrolase 10 OS=Homo sapiens GN=USP10	0.945626	1	1	1	1	846	92.5	5.69
Q9BQG2	Peroxisomal NADH pyrophosphatase NUDT12 OS=Homo sapiens GN=NUDT12 PE=1 SV=1	8.87446	1	1	1	1	462	52	6.83
Q969H4	Connector enhancer of kinase suppressor of ras 1 OS=Homo sapiens GN=CNKSR1 PE=1 SV=1	2.63889	1	1	1	1	720	79.7	5.38
Q8NBN7	Retinol dehydrogenase 13 OS=Homo sapiens GN=RDH13 PE=1 SV=2	3.32326	1	1	1	1	331	35.9	8.1
Q96QC0	Serine/threonine-protein phosphatase 1 regulatory subunit 10 OS=Homo sapiens GN=PPP1R10 PE=1 SV=1	5.95745	1	1	1	1	940	99	9.17
Q8N3T6	Transmembrane protein 132C OS=Homo sapiens GN=TMEM132C PE=2 SV=3	4.51264	1	1	1	1	1108	121.7	6.35
Q96AY4	Tetratricopeptide repeat protein 28 OS=Homo sapiens GN=TTC28 PE=1 SV=4	1.04796	1	1	1	1	2481	270.7	6.89
P20929	Isoform 2 of Nebulin OS=Homo sapiens GN=NEB	0.0821114	1	1	1	1	8525	986	9
P07288	Prostate-specific antigen OS=Homo sapiens GN=KLK3 PE=1 SV=2	6.13027	1	1	1	1	261	28.7	7.68
Q13137	Isoform 4 of Calcium-binding and coiled-coil domain-containing protein 2 OS=Homo sapiens GN=CALCOCO2	2.12766	1	1	1	1	470	55.2	5.11
Q9UPQ0	Isoform 3 of LIM and calponin homology domains-containing protein 1 OS=Homo sapiens GN=LIMCH1	0.408998	1	1	1	1	1467	164.3	6.27
O15550	Lysine-specific demethylase 6A OS=Homo sapiens GN=KDM6A PE=1 SV=2	3.92577	1	1	1	1	1401	154.1	7.44
Q96DC9	Ubiquitin thioesterase OTUB2 OS=Homo sapiens GN=OTUB2 PE=1 SV=2	2.99145	1	1	1	1	234	27.2	6.23

## Sheet: PancPDX
Accession	Description	Coverage	# Peptides	# PSMs	# Unique Peptides	# Protein Groups	# AAs	MW [kDa]	calc. pI
Q09666	Neuroblast differentiation-associated protein AHNAK OS=Homo sapiens GN=AHNAK PE=1 SV=2	52.2071	139	192	138	1	5890	628.7	6.15
Q15149	Plectin OS=Homo sapiens GN=PLEC PE=1 SV=3	36.2511	132	153	127	1	4684	531.5	5.96
Q9NZM1	Myoferlin OS=Homo sapiens GN=MYOF PE=1 SV=1	56.2348	90	118	90	1	2061	234.6	6.18
P10809	60 kDa heat shock protein, mitochondrial OS=Homo sapiens GN=HSPD1 PE=1 SV=2	70.5061	45	85	45	1	573	61	5.87
O75369	Isoform 8 of Filamin-B OS=Homo sapiens GN=FLNB	38.5872	65	77	58	1	2633	281.5	5.71
P35527	Keratin, type I cytoskeletal 9 OS=Homo sapiens GN=KRT9 PE=1 SV=3	60.6742	38	63	37	1	623	62	5.24
P21333	Filamin-A OS=Homo sapiens GN=FLNA PE=1 SV=4	36.4564	59	70	52	1	2647	280.6	6.06
P06576	ATP synthase subunit beta, mitochondrial OS=Homo sapiens GN=ATP5B PE=1 SV=3	69.1871	25	56	25	1	529	56.5	5.4
P05787	Isoform 2 of Keratin, type II cytoskeletal 8 OS=Homo sapiens GN=KRT8	65.7534	42	76	33	1	511	56.6	5.43
P08727	Keratin, type I cytoskeletal 19 OS=Homo sapiens GN=KRT19 PE=1 SV=4	83.75	41	69	30	1	400	44.1	5.14
P11021	78 kDa glucose-regulated protein OS=Homo sapiens GN=HSPA5 PE=1 SV=2	56.422	39	72	37	1	654	72.3	5.16
P04264	Keratin, type II cytoskeletal 1 OS=Homo sapiens GN=KRT1 PE=1 SV=6	64.1304	45	68	39	1	644	66	8.12
P05783	Keratin, type I cytoskeletal 18 OS=Homo sapiens GN=KRT18 PE=1 SV=2	78.8372	33	58	32	1	430	48	5.45
P30101	Protein disulfide-isomerase A3 OS=Homo sapiens GN=PDIA3 PE=1 SV=4	76.0396	35	58	35	1	505	56.7	6.35
P13645	Keratin, type I cytoskeletal 10 OS=Homo sapiens GN=KRT10 PE=1 SV=6	59.7603	32	57	28	1	584	58.8	5.21
P35908	Keratin, type II cytoskeletal 2 epidermal OS=Homo sapiens GN=KRT2 PE=1 SV=2	66.5102	36	49	29	1	639	65.4	8
Q00610	Clathrin heavy chain 1 OS=Homo sapiens GN=CLTC PE=1 SV=5	32.8358	39	47	39	1	1675	191.5	5.69
P60709	Actin, cytoplasmic 1 OS=Homo sapiens GN=ACTB PE=1 SV=1	68.8	23	47	8	1	375	41.7	5.48
P14625	Endoplasmin OS=Homo sapiens GN=HSP90B1 PE=1 SV=1	44.2092	32	49	31	1	803	92.4	4.84
P08729	Keratin, type II cytoskeletal 7 OS=Homo sapiens GN=KRT7 PE=1 SV=5	63.7527	35	57	29	1	469	51.4	5.48
O43707	Alpha-actinin-4 OS=Homo sapiens GN=ACTN4 PE=1 SV=2	52.2503	38	41	38	1	911	104.8	5.44
P38646	Stress-70 protein, mitochondrial OS=Homo sapiens GN=HSPA9 PE=1 SV=2	48.8954	30	44	30	1	679	73.6	6.16
P23229	Isoform Alpha-6X1X2A of Integrin alpha-6 OS=Homo sapiens GN=ITGA6	39.6583	31	46	31	1	1112	124	6.61
P27824	Isoform 2 of Calnexin OS=Homo sapiens GN=CANX	57.2568	27	47	27	1	627	71.5	4.7
Q99798	Aconitate hydratase, mitochondrial OS=Homo sapiens GN=ACO2 PE=1 SV=2	44.359	25	35	25	1	780	85.4	7.61
Q14697	Neutral alpha-glucosidase AB OS=Homo sapiens GN=GANAB PE=1 SV=3	45.0212	28	36	2	1	944	106.8	6.14
P40939	Trifunctional enzyme subunit alpha, mitochondrial OS=Homo sapiens GN=HADHA PE=1 SV=2	56.6186	31	39	31	1	763	82.9	9.04
P07237	Protein disulfide-isomerase OS=Homo sapiens GN=P4HB PE=1 SV=3	65.5512	31	42	31	1	508	57.1	4.87
Q14697	Isoform 2 of Neutral alpha-glucosidase AB OS=Homo sapiens GN=GANAB	43.7888	28	36	2	1	966	109.4	6.24
P05091	Aldehyde dehydrogenase, mitochondrial OS=Homo sapiens GN=ALDH2 PE=1 SV=2	69.6325	28	41	27	1	517	56.3	7.05
P07355	Isoform 2 of Annexin A2 OS=Homo sapiens GN=ANXA2	64.1457	23	37	23	1	357	40.4	8.37
P16144	Integrin beta-4 OS=Homo sapiens GN=ITGB4 PE=1 SV=5	29.034	36	39	36	1	1822	202	6.09
P35221	Catenin alpha-1 OS=Homo sapiens GN=CTNNA1 PE=1 SV=1	48.5651	27	34	27	1	906	100	6.29
P27797	Calreticulin OS=Homo sapiens GN=CALR PE=1 SV=1	68.8249	20	41	20	1	417	48.1	4.44
P16615	Sarcoplasmic/endoplasmic reticulum calcium ATPase 2 OS=Homo sapiens GN=ATP2A2 PE=1 SV=1	34.1651	29	39	29	1	1042	114.7	5.34
P55072	Transitional endoplasmic reticulum ATPase OS=Homo sapiens GN=VCP PE=1 SV=4	47.1464	28	38	28	1	806	89.3	5.26
P11142	Heat shock cognate 71 kDa protein OS=Homo sapiens GN=HSPA8 PE=1 SV=1	49.226	25	35	20	1	646	70.9	5.52
O95831	Apoptosis-inducing factor 1, mitochondrial OS=Homo sapiens GN=AIFM1 PE=1 SV=1	50.2447	24	31	24	1	613	66.9	8.95
P13667	Protein disulfide-isomerase A4 OS=Homo sapiens GN=PDIA4 PE=1 SV=2	52.4031	30	38	30	1	645	72.9	5.07
P42704	Leucine-rich PPR motif-containing protein, mitochondrial OS=Homo sapiens GN=LRPPRC PE=1 SV=3	26.4706	26	33	26	1	1394	157.8	6.13
P04844	Dolichyl-diphosphooligosaccharide--protein glycosyltransferase subunit 2 OS=Homo sapiens GN=RPN2 PE=1 SV=3	47.2266	17	27	17	1	631	69.2	5.69
P22626	Heterogeneous nuclear ribonucleoproteins A2/B1 OS=Homo sapiens GN=HNRNPA2B1 PE=1 SV=2	58.3569	23	36	18	1	353	37.4	8.95
Q9Y6N5	Sulfide:quinone oxidoreductase, mitochondrial OS=Homo sapiens GN=SQRDL PE=1 SV=1	62	23	30	23	1	450	49.9	9.11
P04843	Dolichyl-diphosphooligosaccharide--protein glycosyltransferase subunit 1 OS=Homo sapiens GN=RPN1 PE=1 SV=1	47.2817	22	31	22	1	607	68.5	6.38
P14618	Pyruvate kinase PKM OS=Homo sapiens GN=PKM PE=1 SV=4	56.8738	23	30	23	1	531	57.9	7.84
P05556	Integrin beta-1 OS=Homo sapiens GN=ITGB1 PE=1 SV=2	35.589	23	34	23	1	798	88.4	5.39
P40926	Malate dehydrogenase, mitochondrial OS=Homo sapiens GN=MDH2 PE=1 SV=3	77.2189	19	39	19	1	338	35.5	8.68
P14923	Junction plakoglobin OS=Homo sapiens GN=JUP PE=1 SV=3	49.6644	23	28	20	1	745	81.7	6.14
P34897	Serine hydroxymethyltransferase, mitochondrial OS=Homo sapiens GN=SHMT2 PE=1 SV=3	58.5317	22	29	22	1	504	56	8.53
P19338	Nucleolin OS=Homo sapiens GN=NCL PE=1 SV=3	29.7183	23	32	23	1	710	76.6	4.7
P31040	Succinate dehydrogenase [ubiquinone] flavoprotein subunit, mitochondrial OS=Homo sapiens GN=SDHA PE=1 SV=2	54.5181	23	31	23	1	664	72.6	7.39
P13804	Electron transfer flavoprotein subunit alpha, mitochondrial OS=Homo sapiens GN=ETFA PE=1 SV=1	67.2673	16	27	16	1	333	35.1	8.38
Q9NSE4	Isoleucine--tRNA ligase, mitochondrial OS=Homo sapiens GN=IARS2 PE=1 SV=2	37.9447	25	31	25	1	1012	113.7	7.2
P17301	Integrin alpha-2 OS=Homo sapiens GN=ITGA2 PE=1 SV=1	31.7528	24	31	24	1	1181	129.2	5.31
P00505	Aspartate aminotransferase, mitochondrial OS=Homo sapiens GN=GOT2 PE=1 SV=3	66.5116	25	35	25	1	430	47.5	9.01
P09651	Isoform A1-A of Heterogeneous nuclear ribonucleoprotein A1 OS=Homo sapiens GN=HNRNPA1	76.5625	22	32	17	1	320	34.2	9.23
P25705	ATP synthase subunit alpha, mitochondrial OS=Homo sapiens GN=ATP5A1 PE=1 SV=1	51.1754	25	40	25	1	553	59.7	9.13
P05023	Sodium/potassium-transporting ATPase subunit alpha-1 OS=Homo sapiens GN=ATP1A1 PE=1 SV=1	32.5513	28	33	28	1	1023	112.8	5.49
P00367	Glutamate dehydrogenase 1, mitochondrial OS=Homo sapiens GN=GLUD1 PE=1 SV=2	49.8208	23	30	23	1	558	61.4	7.8
P49748	Isoform 3 of Very long-chain specific acyl-CoA dehydrogenase, mitochondrial OS=Homo sapiens GN=ACADVL	42.0354	22	31	22	1	678	72.9	8.75
P08582	Melanotransferrin OS=Homo sapiens GN=MELTF PE=1 SV=2	48.374	22	25	22	1	738	80.2	5.94
P49257	Protein ERGIC-53 OS=Homo sapiens GN=LMAN1 PE=1 SV=2	46.2745	19	27	19	1	510	57.5	6.77
P49411	Elongation factor Tu, mitochondrial OS=Homo sapiens GN=TUFM PE=1 SV=2	50.4425	17	23	17	1	452	49.5	7.61
P42765	3-ketoacyl-CoA thiolase, mitochondrial OS=Homo sapiens GN=ACAA2 PE=1 SV=2	59.4458	17	23	17	1	397	41.9	8.09
Q12797	Aspartyl/asparaginyl beta-hydroxylase OS=Homo sapiens GN=ASPH PE=1 SV=3	38.5224	22	32	22	1	758	85.8	5.01
P43304	Glycerol-3-phosphate dehydrogenase, mitochondrial OS=Homo sapiens GN=GPD2 PE=1 SV=3	48.1431	25	29	25	1	727	80.8	7.69
P61978	Isoform 2 of Heterogeneous nuclear ribonucleoprotein K OS=Homo sapiens GN=HNRNPK	51.0776	17	26	17	1	464	51	5.33
P22695	Cytochrome b-c1 complex subunit 2, mitochondrial OS=Homo sapiens GN=UQCRC2 PE=1 SV=3	43.7086	17	22	17	1	453	48.4	8.63
P00387	Isoform 3 of NADH-cytochrome b5 reductase 3 OS=Homo sapiens GN=CYB5R3	62.5749	14	20	14	1	334	38.2	6.9
Q9NYU2	UDP-glucose:glycoprotein glucosyltransferase 1 OS=Homo sapiens GN=UGGT1 PE=1 SV=3	21.865	18	25	18	1	1555	177.1	5.63
Q6DD88	Atlastin-3 OS=Homo sapiens GN=ATL3 PE=1 SV=1	47.5046	16	22	16	1	541	60.5	5.66
Q99714	3-hydroxyacyl-CoA dehydrogenase type-2 OS=Homo sapiens GN=HSD17B10 PE=1 SV=3	78.1609	14	18	14	1	261	26.9	7.78
P06748	Nucleophosmin OS=Homo sapiens GN=NPM1 PE=1 SV=2	51.3605	12	24	12	1	294	32.6	4.78
P16435	NADPH--cytochrome P450 reductase OS=Homo sapiens GN=POR PE=1 SV=2	31.1669	16	21	16	1	677	76.6	5.58
P14866	Heterogeneous nuclear ribonucleoprotein L OS=Homo sapiens GN=HNRNPL PE=1 SV=2	46.5195	16	24	16	1	589	64.1	8.22
P16190	HLA class I histocompatibility antigen, A-33 alpha chain OS=Homo sapiens GN=HLA-A PE=1 SV=3	51.2329	14	21	5	1	365	40.9	6.7
Q15084	Isoform 2 of Protein disulfide-isomerase A6 OS=Homo sapiens GN=PDIA6	43.4959	17	23	16	1	492	53.9	5.33
Q9P0L0	Vesicle-associated membrane protein-associated protein A OS=Homo sapiens GN=VAPA PE=1 SV=3	65.4618	14	23	13	1	249	27.9	8.62
O95994	Anterior gradient protein 2 homolog OS=Homo sapiens GN=AGR2 PE=1 SV=1	57.1429	10	22	10	1	175	20	9
Q6PIU2	Isoform 2 of Neutral cholesterol ester hydrolase 1 OS=Homo sapiens GN=NCEH1	45.9135	14	21	14	1	416	46.6	6.62
Q9NQC3	Isoform 2 of Reticulon-4 OS=Homo sapiens GN=RTN4	60.8579	12	25	12	1	373	40.3	4.78
Q9Y4L1	Hypoxia up-regulated protein 1 OS=Homo sapiens GN=HYOU1 PE=1 SV=1	31.8318	21	27	21	1	999	111.3	5.22
P31930	Cytochrome b-c1 complex subunit 1, mitochondrial OS=Homo sapiens GN=UQCRC1 PE=1 SV=3	44.5833	17	23	16	1	480	52.6	6.37
Q07065	Cytoskeleton-associated protein 4 OS=Homo sapiens GN=CKAP4 PE=1 SV=2	37.8738	17	20	17	1	602	66	5.92
P58107	Epiplakin OS=Homo sapiens GN=EPPK1 PE=1 SV=2	21.4538	12	17	8	1	5090	555.3	5.6
P07954	Fumarate hydratase, mitochondrial OS=Homo sapiens GN=FH PE=1 SV=3	54.902	20	26	20	1	510	54.6	8.76
Q00839	Heterogeneous nuclear ribonucleoprotein U OS=Homo sapiens GN=HNRNPU PE=1 SV=6	39.3939	23	24	23	1	825	90.5	6
Q16822	Phosphoenolpyruvate carboxykinase [GTP], mitochondrial OS=Homo sapiens GN=PCK2 PE=1 SV=3	38.9062	18	20	18	1	640	70.7	7.62
Q9BSJ8	Isoform 2 of Extended synaptotagmin-1 OS=Homo sapiens GN=ESYT1	26.93	16	19	15	1	1114	123.9	5.78
P55084	Trifunctional enzyme subunit beta, mitochondrial OS=Homo sapiens GN=HADHB PE=1 SV=3	53.5865	22	24	22	1	474	51.3	9.41
P36776	Lon protease homolog, mitochondrial OS=Homo sapiens GN=LONP1 PE=1 SV=2	29.3014	19	23	19	1	959	106.4	6.39
Q6NUK1	Calcium-binding mitochondrial carrier protein SCaMC-1 OS=Homo sapiens GN=SLC25A24 PE=1 SV=2	47.7987	19	26	19	1	477	53.3	6.33
P21796	Voltage-dependent anion-selective channel protein 1 OS=Homo sapiens GN=VDAC1 PE=1 SV=2	69.9647	13	18	12	1	283	30.8	8.54
Q9BPW9	Isoform 4 of Dehydrogenase/reductase SDR family member 9 OS=Homo sapiens GN=DHRS9	44.3272	17	22	17	1	379	41.9	8.9
P06733	Alpha-enolase OS=Homo sapiens GN=ENO1 PE=1 SV=2	46.5438	16	19	16	1	434	47.1	7.39
O60716	Catenin delta-1 OS=Homo sapiens GN=CTNND1 PE=1 SV=1	27.0661	17	20	17	1	968	108.1	6.23
Q96HE7	ERO1-like protein alpha OS=Homo sapiens GN=ERO1A PE=1 SV=2	49.5726	14	16	14	1	468	54.4	5.68
O43852	Isoform 3 of Calumenin OS=Homo sapiens GN=CALU	59.4427	14	18	14	1	323	38	4.63
P26599	Isoform 3 of Polypyrimidine tract-binding protein 1 OS=Homo sapiens GN=PTBP1	42.7289	15	24	11	1	557	59.6	9.16
P39656	Dolichyl-diphosphooligosaccharide--protein glycosyltransferase 48 kDa subunit OS=Homo sapiens GN=DDOST PE=1 SV=4	45.8333	14	20	14	1	456	50.8	6.55
P68104	Elongation factor 1-alpha 1 OS=Homo sapiens GN=EEF1A1 PE=1 SV=1	42.4242	13	17	13	1	462	50.1	9.01
P08670	Vimentin OS=Homo sapiens GN=VIM PE=1 SV=4	50	20	22	17	1	466	53.6	5.12
P54886	Delta-1-pyrroline-5-carboxylate synthase OS=Homo sapiens GN=ALDH18A1 PE=1 SV=2	24.0252	12	15	12	1	795	87.2	7.12
Q9BRK5	45 kDa calcium-binding protein OS=Homo sapiens GN=SDF4 PE=1 SV=1	40.6077	11	15	11	1	362	41.8	4.86
Q02218	2-oxoglutarate dehydrogenase, mitochondrial OS=Homo sapiens GN=OGDH PE=1 SV=3	24.4379	15	19	15	1	1023	115.9	6.86
P05141	ADP/ATP translocase 2 OS=Homo sapiens GN=SLC25A5 PE=1 SV=7	65.4362	20	29	6	1	298	32.8	9.69
P62873	Guanine nucleotide-binding protein G(I)/G(S)/G(T) subunit beta-1 OS=Homo sapiens GN=GNB1 PE=1 SV=3	56.1765	13	17	7	1	340	37.4	6
P13639	Elongation factor 2 OS=Homo sapiens GN=EEF2 PE=1 SV=4	26.9231	16	18	16	1	858	95.3	6.83
Q15738	Sterol-4-alpha-carboxylate 3-dehydrogenase, decarboxylating OS=Homo sapiens GN=NSDHL PE=1 SV=2	45.5764	12	15	12	1	373	41.9	8.06
P12236	ADP/ATP translocase 3 OS=Homo sapiens GN=SLC25A6 PE=1 SV=4	60.7383	19	27	5	1	298	32.8	9.74
P10319	HLA class I histocompatibility antigen, B-58 alpha chain OS=Homo sapiens GN=HLA-B PE=1 SV=1	46.6851	11	15	1	1	362	40.3	6.3
Q9HDC9	Adipocyte plasma membrane-associated protein OS=Homo sapiens GN=APMAP PE=1 SV=2	44.9519	13	19	13	1	416	46.5	6.16
P01892	HLA class I histocompatibility antigen, A-2 alpha chain OS=Homo sapiens GN=HLA-A PE=1 SV=1	34.5205	8	14	0	1	365	40.9	6.99
P09622	Dihydrolipoyl dehydrogenase, mitochondrial OS=Homo sapiens GN=DLD PE=1 SV=2	36.5422	14	17	14	1	509	54.1	7.85
P04179	Superoxide dismutase [Mn], mitochondrial OS=Homo sapiens GN=SOD2 PE=1 SV=2	71.1712	10	16	10	1	222	24.7	8.25
Q6S8J3	POTE ankyrin domain family member E OS=Homo sapiens GN=POTEE PE=1 SV=3	11.2558	10	18	1	1	1075	121.3	6.2
Q02818	Nucleobindin-1 OS=Homo sapiens GN=NUCB1 PE=1 SV=4	45.1193	16	19	15	1	461	53.8	5.25
Q5JRX3	Isoform 2 of Presequence protease, mitochondrial OS=Homo sapiens GN=PITRM1	24.8555	15	15	15	1	1038	117.4	6.92
P68032	Actin, alpha cardiac muscle 1 OS=Homo sapiens GN=ACTC1 PE=1 SV=1	31.8302	13	27	1	1	377	42	5.39
P14314	Glucosidase 2 subunit beta OS=Homo sapiens GN=PRKCSH PE=1 SV=2	31.0606	11	13	11	1	528	59.4	4.41
Q9ULC5	Isoform 2 of Long-chain-fatty-acid--CoA ligase 5 OS=Homo sapiens GN=ACSL5	28.5521	15	16	15	1	739	82.2	7.39
P18031	Tyrosine-protein phosphatase non-receptor type 1 OS=Homo sapiens GN=PTPN1 PE=1 SV=1	40.2299	12	15	12	1	435	49.9	6.27
Q9P2E9	Ribosome-binding protein 1 OS=Homo sapiens GN=RRBP1 PE=1 SV=4	12.3404	12	13	12	1	1410	152.4	8.6
Q15165	Serum paraoxonase/arylesterase 2 OS=Homo sapiens GN=PON2 PE=1 SV=3	60.1695	10	17	10	1	354	39.4	5.6
P55795	Heterogeneous nuclear ribonucleoprotein H2 OS=Homo sapiens GN=HNRNPH2 PE=1 SV=1	35.412	11	14	6	1	449	49.2	6.3
Q9BS26	Endoplasmic reticulum resident protein 44 OS=Homo sapiens GN=ERP44 PE=1 SV=1	37.4384	10	14	10	1	406	46.9	5.26
Q9UJS0	Isoform 2 of Calcium-binding mitochondrial carrier protein Aralar2 OS=Homo sapiens GN=SLC25A13	28.6982	11	13	7	1	676	74.3	8.62
P11940	Polyadenylate-binding protein 1 OS=Homo sapiens GN=PABPC1 PE=1 SV=2	25.9434	13	14	7	1	636	70.6	9.5
P26038	Moesin OS=Homo sapiens GN=MSN PE=1 SV=3	29.636	14	19	10	1	577	67.8	6.4
Q08380	Galectin-3-binding protein OS=Homo sapiens GN=LGALS3BP PE=1 SV=1	34.5299	14	16	14	1	585	65.3	5.27
P67809	Nuclease-sensitive element-binding protein 1 OS=Homo sapiens GN=YBX1 PE=1 SV=3	40.1235	7	11	7	1	324	35.9	9.88
Q6NZI2	Polymerase I and transcript release factor OS=Homo sapiens GN=PTRF PE=1 SV=1	31.0256	9	14	9	1	390	43.5	5.6
P29966	Myristoylated alanine-rich C-kinase substrate OS=Homo sapiens GN=MARCKS PE=1 SV=4	41.5663	8	10	8	1	332	31.5	4.45
Q9BWM7	Sideroflexin-3 OS=Homo sapiens GN=SFXN3 PE=1 SV=2	45.5385	11	15	10	1	325	36	9.09
P45880	Isoform 1 of Voltage-dependent anion-selective channel protein 2 OS=Homo sapiens GN=VDAC2	43.6893	10	16	10	1	309	33.4	7.59
P02533	Keratin, type I cytoskeletal 14 OS=Homo sapiens GN=KRT14 PE=1 SV=4	20.339	13	15	2	1	472	51.5	5.16
P04406	Glyceraldehyde-3-phosphate dehydrogenase OS=Homo sapiens GN=GAPDH PE=1 SV=3	51.6418	12	15	12	1	335	36	8.46
Q12931	Heat shock protein 75 kDa, mitochondrial OS=Homo sapiens GN=TRAP1 PE=1 SV=3	25.2841	16	16	15	1	704	80.1	8.21
Q9H2U2	Isoform 2 of Inorganic pyrophosphatase 2, mitochondrial OS=Homo sapiens GN=PPA2	49.5702	14	16	14	1	349	39.6	6.92
Q27J81	Inverted formin-2 OS=Homo sapiens GN=INF2 PE=1 SV=2	15.3723	9	12	9	1	1249	135.5	5.38
P23368	NAD-dependent malic enzyme, mitochondrial OS=Homo sapiens GN=ME2 PE=1 SV=1	29.2808	9	12	9	1	584	65.4	7.61
O15460	Prolyl 4-hydroxylase subunit alpha-2 OS=Homo sapiens GN=P4HA2 PE=1 SV=1	30.2804	10	11	10	1	535	60.9	5.71
P36957	Dihydrolipoyllysine-residue succinyltransferase component of 2-oxoglutarate dehydrogenase complex, mitochondrial OS=Homo sapiens GN=DLST PE=1 SV=4	33.7748	10	16	10	1	453	48.7	8.95
P21397	Amine oxidase [flavin-containing] A OS=Homo sapiens GN=MAOA PE=1 SV=1	25.0474	10	13	7	1	527	59.6	7.85
O75390	Citrate synthase, mitochondrial OS=Homo sapiens GN=CS PE=1 SV=2	41.2017	12	16	12	1	466	51.7	8.32
P0DMV9	Heat shock 70 kDa protein 1B OS=Homo sapiens GN=HSPA1B PE=1 SV=1	28.2371	14	14	10	1	641	70	5.66
P50213	Isocitrate dehydrogenase [NAD] subunit alpha, mitochondrial OS=Homo sapiens GN=IDH3A PE=1 SV=1	34.9727	11	15	11	1	366	39.6	6.92
P62879	Guanine nucleotide-binding protein G(I)/G(S)/G(T) subunit beta-2 OS=Homo sapiens GN=GNB2 PE=1 SV=3	46.7647	12	15	6	1	340	37.3	6
O94826	Mitochondrial import receptor subunit TOM70 OS=Homo sapiens GN=TOMM70 PE=1 SV=1	26.3158	10	12	10	1	608	67.4	7.12
Q12907	Vesicular integral-membrane protein VIP36 OS=Homo sapiens GN=LMAN2 PE=1 SV=1	37.9213	10	10	10	1	356	40.2	6.95
P08134	Rho-related GTP-binding protein RhoC OS=Homo sapiens GN=RHOC PE=1 SV=1	68.3938	10	14	3	1	193	22	6.58
P02786	Transferrin receptor protein 1 OS=Homo sapiens GN=TFRC PE=1 SV=2	20.7895	12	13	12	1	760	84.8	6.61
P07099	Epoxide hydrolase 1 OS=Homo sapiens GN=EPHX1 PE=1 SV=1	42.4176	14	17	14	1	455	52.9	7.25
Q12905	Interleukin enhancer-binding factor 2 OS=Homo sapiens GN=ILF2 PE=1 SV=2	36.6667	9	11	9	1	390	43	5.26
Q96AG4	Leucine-rich repeat-containing protein 59 OS=Homo sapiens GN=LRRC59 PE=1 SV=1	37.785	9	12	9	1	307	34.9	9.57
P27144	Adenylate kinase 4, mitochondrial OS=Homo sapiens GN=AK4 PE=1 SV=1	58.7444	9	14	9	1	223	25.3	8.4
P27338	Amine oxidase [flavin-containing] B OS=Homo sapiens GN=MAOB PE=1 SV=3	29.2308	11	13	8	1	520	58.7	7.5
P30048	Thioredoxin-dependent peroxide reductase, mitochondrial OS=Homo sapiens GN=PRDX3 PE=1 SV=3	43.3594	9	13	9	1	256	27.7	7.78
P61586	Transforming protein RhoA OS=Homo sapiens GN=RHOA PE=1 SV=1	65.285	9	13	2	1	193	21.8	6.1
P13010	X-ray repair cross-complementing protein 5 OS=Homo sapiens GN=XRCC5 PE=1 SV=3	31.694	12	13	12	1	732	82.7	5.81
P06731	Carcinoembryonic antigen-related cell adhesion molecule 5 OS=Homo sapiens GN=CEACAM5 PE=1 SV=3	18.2336	8	12	6	1	702	76.7	5.92
Q15293	Reticulocalbin-1 OS=Homo sapiens GN=RCN1 PE=1 SV=1	42.2961	11	13	11	1	331	38.9	5
Q9HCC0	Methylcrotonoyl-CoA carboxylase beta chain, mitochondrial OS=Homo sapiens GN=MCCC2 PE=1 SV=1	30.9059	12	13	12	1	563	61.3	7.68
P55809	Succinyl-CoA:3-ketoacid coenzyme A transferase 1, mitochondrial OS=Homo sapiens GN=OXCT1 PE=1 SV=1	29.2308	10	12	10	1	520	56.1	7.46
P30464	HLA class I histocompatibility antigen, B-15 alpha chain OS=Homo sapiens GN=HLA-B PE=1 SV=2	39.779	9	12	0	1	362	40.4	6.3
P04181	Ornithine aminotransferase, mitochondrial OS=Homo sapiens GN=OAT PE=1 SV=1	42.8246	12	14	11	1	439	48.5	7.03
P07339	Cathepsin D OS=Homo sapiens GN=CTSD PE=1 SV=1	41.5049	13	14	13	1	412	44.5	6.54
Q7L5N7	Lysophosphatidylcholine acyltransferase 2 OS=Homo sapiens GN=LPCAT2 PE=1 SV=1	35.6618	13	13	13	1	544	60.2	6.55
P38117	Isoform 2 of Electron transfer flavoprotein subunit beta OS=Homo sapiens GN=ETFB	30.0578	10	14	10	1	346	37.4	7.17
P46977	Dolichyl-diphosphooligosaccharide--protein glycosyltransferase subunit STT3A OS=Homo sapiens GN=STT3A PE=1 SV=2	16.5957	10	13	10	1	705	80.5	8.07
P10515	Dihydrolipoyllysine-residue acetyltransferase component of pyruvate dehydrogenase complex, mitochondrial OS=Homo sapiens GN=DLAT PE=1 SV=3	30.4482	12	15	12	1	647	69	7.84
Q16762	Thiosulfate sulfurtransferase OS=Homo sapiens GN=TST PE=1 SV=4	39.3939	10	14	10	1	297	33.4	7.25
O96008	Mitochondrial import receptor subunit TOM40 homolog OS=Homo sapiens GN=TOMM40 PE=1 SV=1	45.4294	10	12	10	1	361	37.9	7.25
Q96SQ9	Isoform 2 of Cytochrome P450 2S1 OS=Homo sapiens GN=CYP2S1	26.773	10	12	10	1	564	62.2	9.38
O95202	LETM1 and EF-hand domain-containing protein 1, mitochondrial OS=Homo sapiens GN=LETM1 PE=1 SV=1	23.41	11	13	11	1	739	83.3	6.7
P15311	Ezrin OS=Homo sapiens GN=EZR PE=1 SV=4	22.8669	13	16	9	1	586	69.4	6.27
Q9Y305	Isoform 4 of Acyl-coenzyme A thioesterase 9, mitochondrial OS=Homo sapiens GN=ACOT9	33.9286	14	14	14	1	448	50.8	8.53
O00264	Membrane-associated progesterone receptor component 1 OS=Homo sapiens GN=PGRMC1 PE=1 SV=3	50.2564	10	15	9	1	195	21.7	4.7
P51991	Heterogeneous nuclear ribonucleoprotein A3 OS=Homo sapiens GN=HNRNPA3 PE=1 SV=2	33.3333	11	15	9	1	378	39.6	9.01
P49419	Isoform 2 of Alpha-aminoadipic semialdehyde dehydrogenase OS=Homo sapiens GN=ALDH7A1	33.2681	10	12	10	1	511	55.3	6.86
P54819	Adenylate kinase 2, mitochondrial OS=Homo sapiens GN=AK2 PE=1 SV=2	49.3724	8	10	8	1	239	26.5	7.81
P00558	Phosphoglycerate kinase 1 OS=Homo sapiens GN=PGK1 PE=1 SV=3	41.4868	13	14	13	1	417	44.6	8.1
P00533	Epidermal growth factor receptor OS=Homo sapiens GN=EGFR PE=1 SV=2	11.0744	9	10	9	1	1210	134.2	6.68
P47985	Cytochrome b-c1 complex subunit Rieske, mitochondrial OS=Homo sapiens GN=UQCRFS1 PE=1 SV=2	39.0511	8	11	8	1	274	29.6	8.32
P13647	Keratin, type II cytoskeletal 5 OS=Homo sapiens GN=KRT5 PE=1 SV=3	20	15	17	6	1	590	62.3	7.74
O94925	Isoform 3 of Glutaminase kidney isoform, mitochondrial OS=Homo sapiens GN=GLS	28.2609	10	12	10	1	598	65.4	7.88
Q9BQE5	Apolipoprotein L2 OS=Homo sapiens GN=APOL2 PE=1 SV=1	34.1246	9	12	9	1	337	37.1	6.74
P30084	Enoyl-CoA hydratase, mitochondrial OS=Homo sapiens GN=ECHS1 PE=1 SV=4	28.6207	6	11	6	1	290	31.4	8.07
Q96HY6	DDRGK domain-containing protein 1 OS=Homo sapiens GN=DDRGK1 PE=1 SV=2	35.0318	6	8	6	1	314	35.6	5.12
P30492	HLA class I histocompatibility antigen, B-54 alpha chain OS=Homo sapiens GN=HLA-B PE=1 SV=1	29.0055	8	11	0	1	362	40.4	6.3
P31937	3-hydroxyisobutyrate dehydrogenase, mitochondrial OS=Homo sapiens GN=HIBADH PE=1 SV=2	30.0595	8	13	8	1	336	35.3	8.13
P29317	Ephrin type-A receptor 2 OS=Homo sapiens GN=EPHA2 PE=1 SV=2	17.418	10	11	10	1	976	108.2	6.23
P23786	Carnitine O-palmitoyltransferase 2, mitochondrial OS=Homo sapiens GN=CPT2 PE=1 SV=2	22.9483	10	10	10	1	658	73.7	8.18
P08195	Isoform 4 of 4F2 cell-surface antigen heavy chain OS=Homo sapiens GN=SLC3A2	19.2133	9	10	9	1	661	71.1	4.97
Q9UJZ1	Stomatin-like protein 2, mitochondrial OS=Homo sapiens GN=STOML2 PE=1 SV=1	24.7191	6	9	6	1	356	38.5	7.39
P40199	Carcinoembryonic antigen-related cell adhesion molecule 6 OS=Homo sapiens GN=CEACAM6 PE=1 SV=3	23.5465	5	12	4	1	344	37.2	5.82
P35613	Basigin OS=Homo sapiens GN=BSG PE=1 SV=2	27.5325	6	8	6	1	385	42.2	5.66
Q9NVI7	ATPase family AAA domain-containing protein 3A OS=Homo sapiens GN=ATAD3A PE=1 SV=2	17.8233	11	12	11	1	634	71.3	8.98
P63010	Isoform 2 of AP-2 complex subunit beta OS=Homo sapiens GN=AP2B1	21.9769	8	11	5	1	951	105.6	5.34
Q92520	Protein FAM3C OS=Homo sapiens GN=FAM3C PE=1 SV=1	41.4097	8	11	8	1	227	24.7	8.29
Q9BPW8	Protein NipSnap homolog 1 OS=Homo sapiens GN=NIPSNAP1 PE=1 SV=1	35.9155	6	9	6	1	284	33.3	9.31
P09758	Tumor-associated calcium signal transducer 2 OS=Homo sapiens GN=TACSTD2 PE=1 SV=3	23.839	5	8	5	1	323	35.7	8.87
Q86YZ3	Hornerin OS=Homo sapiens GN=HRNR PE=1 SV=2	11.8246	9	9	9	1	2850	282.2	10.04
P63241	Isoform 2 of Eukaryotic translation initiation factor 5A-1 OS=Homo sapiens GN=EIF5A	33.6957	5	8	5	1	184	20.2	7.01
O60506	Heterogeneous nuclear ribonucleoprotein Q OS=Homo sapiens GN=SYNCRIP PE=1 SV=2	19.4222	10	11	6	1	623	69.6	8.59
O95571	Persulfide dioxygenase ETHE1, mitochondrial OS=Homo sapiens GN=ETHE1 PE=1 SV=2	56.2992	10	14	10	1	254	27.9	6.83
P51572	Isoform 2 of B-cell receptor-associated protein 31 OS=Homo sapiens GN=BCAP31	28.754	12	17	12	1	313	34.7	7.84
Q86UP2	Kinectin OS=Homo sapiens GN=KTN1 PE=1 SV=1	12.7487	12	12	12	1	1357	156.2	5.64
P12956	X-ray repair cross-complementing protein 6 OS=Homo sapiens GN=XRCC6 PE=1 SV=2	30.5419	12	12	12	1	609	69.8	6.64
P07910	Heterogeneous nuclear ribonucleoproteins C1/C2 OS=Homo sapiens GN=HNRNPC PE=1 SV=4	33.0065	12	15	12	1	306	33.7	5.08
Q9UHG3	Prenylcysteine oxidase 1 OS=Homo sapiens GN=PCYOX1 PE=1 SV=3	25.5446	10	12	10	1	505	56.6	6.18
P16070	CD44 antigen OS=Homo sapiens GN=CD44 PE=1 SV=3	11.9946	8	11	8	1	742	81.5	5.33
P52272	Heterogeneous nuclear ribonucleoprotein M OS=Homo sapiens GN=HNRNPM PE=1 SV=3	25.8904	16	16	16	1	730	77.5	8.7
P52597	Heterogeneous nuclear ribonucleoprotein F OS=Homo sapiens GN=HNRNPF PE=1 SV=3	20.7229	5	7	4	1	415	45.6	5.58
Q9HAV7	GrpE protein homolog 1, mitochondrial OS=Homo sapiens GN=GRPEL1 PE=1 SV=2	46.5438	9	11	9	1	217	24.3	8.12
P30044	Peroxiredoxin-5, mitochondrial OS=Homo sapiens GN=PRDX5 PE=1 SV=4	55.1402	8	11	8	1	214	22.1	8.7
O43169	Cytochrome b5 type B OS=Homo sapiens GN=CYB5B PE=1 SV=2	69.863	5	9	5	1	146	16.3	4.97
O94874	E3 UFM1-protein ligase 1 OS=Homo sapiens GN=UFL1 PE=1 SV=2	18.136	8	8	8	1	794	89.5	6.79
P42126	Enoyl-CoA delta isomerase 1, mitochondrial OS=Homo sapiens GN=ECI1 PE=1 SV=1	46.6887	8	10	8	1	302	32.8	8.54
P16422	Epithelial cell adhesion molecule OS=Homo sapiens GN=EPCAM PE=1 SV=2	28.9809	6	9	6	1	314	34.9	7.46
Q01105	Protein SET OS=Homo sapiens GN=SET PE=1 SV=3	33.7931	7	9	7	1	290	33.5	4.32
P19367	Isoform 3 of Hexokinase-1 OS=Homo sapiens GN=HK1	13.6808	12	12	12	1	921	102.7	6.76
Q07021	Complement component 1 Q subcomponent-binding protein, mitochondrial OS=Homo sapiens GN=C1QBP PE=1 SV=1	35.461	5	9	5	1	282	31.3	4.84
Q9H9B4	Sideroflexin-1 OS=Homo sapiens GN=SFXN1 PE=1 SV=4	27.6398	7	10	6	1	322	35.6	9.07
P39023	60S ribosomal protein L3 OS=Homo sapiens GN=RPL3 PE=1 SV=2	30.5211	11	11	11	1	403	46.1	10.18
P43243	Matrin-3 OS=Homo sapiens GN=MATR3 PE=1 SV=2	12.3967	7	12	7	1	847	94.6	6.25
P30519	Heme oxygenase 2 OS=Homo sapiens GN=HMOX2 PE=1 SV=2	25.6329	6	10	6	1	316	36	5.41
Q08211	ATP-dependent RNA helicase A OS=Homo sapiens GN=DHX9 PE=1 SV=4	9.44882	8	8	8	1	1270	140.9	6.84
Q13838	Isoform 2 of Spliceosome RNA helicase DDX39B OS=Homo sapiens GN=DDX39B	28.8939	10	10	2	1	443	50.6	5.88
Q15233	Non-POU domain-containing octamer-binding protein OS=Homo sapiens GN=NONO PE=1 SV=4	25.69	9	11	8	1	471	54.2	8.95
P22307	Non-specific lipid-transfer protein OS=Homo sapiens GN=SCP2 PE=1 SV=2	23.5832	11	15	11	1	547	59	6.89
P13674	Prolyl 4-hydroxylase subunit alpha-1 OS=Homo sapiens GN=P4HA1 PE=1 SV=2	21.3483	7	8	7	1	534	61	6.01
P04222	HLA class I histocompatibility antigen, Cw-3 alpha chain OS=Homo sapiens GN=HLA-C PE=1 SV=2	25.1366	7	9	1	1	366	40.8	6.39
Q96CM8	Isoform 2 of Acyl-CoA synthetase family member 2, mitochondrial OS=Homo sapiens GN=ACSF2	23.125	8	10	8	1	640	70.6	7.84
P35232	Prohibitin OS=Homo sapiens GN=PHB PE=1 SV=1	43.0147	8	10	8	1	272	29.8	5.76
Q96S66	Chloride channel CLIC-like protein 1 OS=Homo sapiens GN=CLCC1 PE=1 SV=1	21.9601	7	7	7	1	551	62	5.55
Q13310	Isoform 3 of Polyadenylate-binding protein 4 OS=Homo sapiens GN=PABPC4	16.8182	7	8	1	1	660	72.3	9.35
P51648	Isoform 2 of Fatty aldehyde dehydrogenase OS=Homo sapiens GN=ALDH3A2	19.2913	8	8	8	1	508	57.6	8.92
Q00325	Phosphate carrier protein, mitochondrial OS=Homo sapiens GN=SLC25A3 PE=1 SV=2	29.8343	11	13	11	1	362	40.1	9.38
P13726	Tissue factor OS=Homo sapiens GN=F3 PE=1 SV=1	49.1525	8	11	8	1	295	33	7.03
O00148	ATP-dependent RNA helicase DDX39A OS=Homo sapiens GN=DDX39A PE=1 SV=2	27.8689	9	9	1	1	427	49.1	5.68
P62820	Ras-related protein Rab-1A OS=Homo sapiens GN=RAB1A PE=1 SV=3	52.6829	11	13	3	1	205	22.7	6.21
Q14103	Heterogeneous nuclear ribonucleoprotein D0 OS=Homo sapiens GN=HNRNPD PE=1 SV=1	26.1972	8	11	6	1	355	38.4	7.81
P31943	Heterogeneous nuclear ribonucleoprotein H OS=Homo sapiens GN=HNRNPH1 PE=1 SV=4	20.2673	7	10	2	1	449	49.2	6.3
Q16836	Isoform 2 of Hydroxyacyl-coenzyme A dehydrogenase, mitochondrial OS=Homo sapiens GN=HADH	31.2821	8	11	8	1	390	42.1	9.26
P68431	Histone H3.1 OS=Homo sapiens GN=HIST1H3A PE=1 SV=2	40.4412	4	7	1	1	136	15.4	11.12
Q9UII2	ATPase inhibitor, mitochondrial OS=Homo sapiens GN=ATPIF1 PE=1 SV=1	18.8679	4	15	4	1	106	12.2	9.35
P08865	40S ribosomal protein SA OS=Homo sapiens GN=RPSA PE=1 SV=4	40.678	7	8	7	1	295	32.8	4.87
Q14108	Lysosome membrane protein 2 OS=Homo sapiens GN=SCARB2 PE=1 SV=2	23.6402	8	12	8	1	478	54.3	5.14
O15173	Isoform 2 of Membrane-associated progesterone receptor component 2 OS=Homo sapiens GN=PGRMC2	34.8178	8	10	7	1	247	26.2	5.31
O43390	Heterogeneous nuclear ribonucleoprotein R OS=Homo sapiens GN=HNRNPR PE=1 SV=1	18.9573	10	10	6	1	633	70.9	8.13
A0FGR8	Isoform 2 of Extended synaptotagmin-2 OS=Homo sapiens GN=ESYT2	12.43	8	11	7	1	893	98.8	8.68
Q96CS3	FAS-associated factor 2 OS=Homo sapiens GN=FAF2 PE=1 SV=2	29.6629	8	8	8	1	445	52.6	5.62
Q92945	Far upstream element-binding protein 2 OS=Homo sapiens GN=KHSRP PE=1 SV=4	15.4712	9	9	7	1	711	73.1	7.3
Q9H0U4	Ras-related protein Rab-1B OS=Homo sapiens GN=RAB1B PE=1 SV=1	51.7413	9	11	1	1	201	22.2	5.73
Q9BVK6	Transmembrane emp24 domain-containing protein 9 OS=Homo sapiens GN=TMED9 PE=1 SV=2	35.3191	9	11	7	1	235	27.3	8.02
Q96AB3	Isoform 2 of Isochorismatase domain-containing protein 2 OS=Homo sapiens GN=ISOC2	46.1538	5	5	5	1	221	24.1	7.77
P61019	Ras-related protein Rab-2A OS=Homo sapiens GN=RAB2A PE=1 SV=1	36.3208	6	8	6	1	212	23.5	6.54
O15270	Serine palmitoyltransferase 2 OS=Homo sapiens GN=SPTLC2 PE=1 SV=1	17.6157	6	7	6	1	562	62.9	7.78
Q02878	60S ribosomal protein L6 OS=Homo sapiens GN=RPL6 PE=1 SV=3	34.7222	9	11	9	1	288	32.7	10.58
P36578	60S ribosomal protein L4 OS=Homo sapiens GN=RPL4 PE=1 SV=5	31.3817	12	14	12	1	427	47.7	11.06
O95573	Long-chain-fatty-acid--CoA ligase 3 OS=Homo sapiens GN=ACSL3 PE=1 SV=3	15.9722	8	10	6	1	720	80.4	8.38
O14773	Tripeptidyl-peptidase 1 OS=Homo sapiens GN=TPP1 PE=1 SV=2	18.4725	5	6	5	1	563	61.2	6.48
O00425	Insulin-like growth factor 2 mRNA-binding protein 3 OS=Homo sapiens GN=IGF2BP3 PE=1 SV=2	21.0708	8	8	7	1	579	63.7	8.87
P18859	Isoform 2 of ATP synthase-coupling factor 6, mitochondrial OS=Homo sapiens GN=ATP5J	42.2414	5	9	5	1	116	13.4	9.07
Q99536	Synaptic vesicle membrane protein VAT-1 homolog OS=Homo sapiens GN=VAT1 PE=1 SV=2	28.4987	7	8	7	1	393	41.9	6.29
P23246	Splicing factor, proline- and glutamine-rich OS=Homo sapiens GN=SFPQ PE=1 SV=2	19.2362	9	12	8	1	707	76.1	9.44
Q9HD45	Transmembrane 9 superfamily member 3 OS=Homo sapiens GN=TM9SF3 PE=1 SV=2	17.1477	8	9	8	1	589	67.8	7.21
Q13423	NAD(P) transhydrogenase, mitochondrial OS=Homo sapiens GN=NNT PE=1 SV=3	13.9963	12	12	12	1	1086	113.8	8.09
P60953	Cell division control protein 42 homolog OS=Homo sapiens GN=CDC42 PE=1 SV=2	52.8796	7	12	6	1	191	21.2	6.55
O00161	Synaptosomal-associated protein 23 OS=Homo sapiens GN=SNAP23 PE=1 SV=1	31.2796	5	8	5	1	211	23.3	5.01
O43399	Isoform 7 of Tumor protein D54 OS=Homo sapiens GN=TPD52L2	44.5415	7	7	7	1	229	24.8	6.42
O60313	Isoform 2 of Dynamin-like 120 kDa protein, mitochondrial OS=Homo sapiens GN=OPA1	11.9358	9	9	9	1	997	115.8	7.87
P19075	Tetraspanin-8 OS=Homo sapiens GN=TSPAN8 PE=1 SV=1	25.7384	5	8	5	1	237	26	5.6
Q8NFQ8	Torsin-1A-interacting protein 2 OS=Homo sapiens GN=TOR1AIP2 PE=1 SV=1	21.2766	6	7	5	1	470	51.2	4.96
Q99623	Prohibitin-2 OS=Homo sapiens GN=PHB2 PE=1 SV=2	32.107	8	8	8	1	299	33.3	9.83
P36542	ATP synthase subunit gamma, mitochondrial OS=Homo sapiens GN=ATP5C1 PE=1 SV=1	36.9128	9	11	9	1	298	33	9.22
P05161	Ubiquitin-like protein ISG15 OS=Homo sapiens GN=ISG15 PE=1 SV=5	36.9697	5	7	5	1	165	17.9	7.44
P17844	Probable ATP-dependent RNA helicase DDX5 OS=Homo sapiens GN=DDX5 PE=1 SV=1	17.101	7	7	5	1	614	69.1	8.92
O43837	Isocitrate dehydrogenase [NAD] subunit beta, mitochondrial OS=Homo sapiens GN=IDH3B PE=1 SV=2	36.1039	8	9	8	1	385	42.2	8.46
O95292	Vesicle-associated membrane protein-associated protein B/C OS=Homo sapiens GN=VAPB PE=1 SV=3	31.6872	7	9	6	1	243	27.2	7.3
P23284	Peptidyl-prolyl cis-trans isomerase B OS=Homo sapiens GN=PPIB PE=1 SV=2	43.5185	10	11	10	1	216	23.7	9.41
Q16798	NADP-dependent malic enzyme, mitochondrial OS=Homo sapiens GN=ME3 PE=2 SV=2	22.0199	5	6	5	1	604	67	7.97
Q9Y6C9	Mitochondrial carrier homolog 2 OS=Homo sapiens GN=MTCH2 PE=1 SV=1	25.7426	6	6	6	1	303	33.3	7.97
P30837	Aldehyde dehydrogenase X, mitochondrial OS=Homo sapiens GN=ALDH1B1 PE=1 SV=3	23.2108	7	7	6	1	517	57.2	6.8
O75746	Calcium-binding mitochondrial carrier protein Aralar1 OS=Homo sapiens GN=SLC25A12 PE=1 SV=2	11.5044	6	6	2	1	678	74.7	8.38
P35222	Catenin beta-1 OS=Homo sapiens GN=CTNNB1 PE=1 SV=1	13.9565	8	9	5	1	781	85.4	5.86
O15382	Branched-chain-amino-acid aminotransferase, mitochondrial OS=Homo sapiens GN=BCAT2 PE=1 SV=2	25.5102	7	7	7	1	392	44.3	8.65
P50454	Serpin H1 OS=Homo sapiens GN=SERPINH1 PE=1 SV=2	23.9234	6	7	6	1	418	46.4	8.69
P61026	Ras-related protein Rab-10 OS=Homo sapiens GN=RAB10 PE=1 SV=1	38	8	11	6	1	200	22.5	8.38
O60664	Perilipin-3 OS=Homo sapiens GN=PLIN3 PE=1 SV=3	22.1198	5	5	5	1	434	47	5.44
P61313	60S ribosomal protein L15 OS=Homo sapiens GN=RPL15 PE=1 SV=2	43.1373	8	11	8	1	204	24.1	11.62
P53701	Cytochrome c-type heme lyase OS=Homo sapiens GN=HCCS PE=1 SV=1	30.2239	6	6	6	1	268	30.6	6.68
P63244	Receptor of activated protein C kinase 1 OS=Homo sapiens GN=RACK1 PE=1 SV=3	28.7066	6	7	6	1	317	35.1	7.69
Q13162	Peroxiredoxin-4 OS=Homo sapiens GN=PRDX4 PE=1 SV=1	30.2583	5	6	5	1	271	30.5	6.29
Q99685	Monoglyceride lipase OS=Homo sapiens GN=MGLL PE=1 SV=2	29.703	5	8	5	1	303	33.2	6.99
P48047	ATP synthase subunit O, mitochondrial OS=Homo sapiens GN=ATP5O PE=1 SV=1	45.0704	9	10	9	1	213	23.3	9.96
P05026	Sodium/potassium-transporting ATPase subunit beta-1 OS=Homo sapiens GN=ATP1B1 PE=1 SV=1	28.3828	6	8	6	1	303	35	8.53
Q07955	Serine/arginine-rich splicing factor 1 OS=Homo sapiens GN=SRSF1 PE=1 SV=2	44.3548	9	9	9	1	248	27.7	10.36
Q99729	Isoform 2 of Heterogeneous nuclear ribonucleoprotein A/B OS=Homo sapiens GN=HNRNPAB	26.2048	7	9	6	1	332	35.9	6.95
P35637	RNA-binding protein FUS OS=Homo sapiens GN=FUS PE=1 SV=1	11.597	6	7	3	1	526	53.4	9.36
P61224	Ras-related protein Rap-1b OS=Homo sapiens GN=RAP1B PE=1 SV=1	55.9783	9	9	9	1	184	20.8	5.78
Q8NBS9	Thioredoxin domain-containing protein 5 OS=Homo sapiens GN=TXNDC5 PE=1 SV=2	15.9722	6	6	6	1	432	47.6	5.97
P61604	10 kDa heat shock protein, mitochondrial OS=Homo sapiens GN=HSPE1 PE=1 SV=2	77.451	9	13	9	1	102	10.9	8.92
P36551	Oxygen-dependent coproporphyrinogen-III oxidase, mitochondrial OS=Homo sapiens GN=CPOX PE=1 SV=3	18.2819	7	7	7	1	454	50.1	8.25
P08559	Isoform 4 of Pyruvate dehydrogenase E1 component subunit alpha, somatic form, mitochondrial OS=Homo sapiens GN=PDHA1	21.729	7	7	7	1	428	47.5	8.54
P51148	Isoform 2 of Ras-related protein Rab-5C OS=Homo sapiens GN=RAB5C	34.9398	7	7	7	1	249	27	8.66
Q92841	Probable ATP-dependent RNA helicase DDX17 OS=Homo sapiens GN=DDX17 PE=1 SV=2	16.0494	7	7	5	1	729	80.2	8.27
P05387	60S acidic ribosomal protein P2 OS=Homo sapiens GN=RPLP2 PE=1 SV=1	69.5652	4	5	4	1	115	11.7	4.54
O15269	Serine palmitoyltransferase 1 OS=Homo sapiens GN=SPTLC1 PE=1 SV=1	20.9302	6	7	6	1	473	52.7	6.01
Q3ZCQ8	Isoform 2 of Mitochondrial import inner membrane translocase subunit TIM50 OS=Homo sapiens GN=TIMM50	21.4912	7	8	7	1	456	50.4	9.42
Q5JWF2	Guanine nucleotide-binding protein G(s) subunit alpha isoforms XLas OS=Homo sapiens GN=GNAS PE=1 SV=2	9.45034	6	6	5	1	1037	111	5.03
P14854	Cytochrome c oxidase subunit 6B1 OS=Homo sapiens GN=COX6B1 PE=1 SV=2	67.4419	7	9	7	1	86	10.2	7.05
P07602	Isoform Sap-mu-9 of Prosaposin OS=Homo sapiens GN=PSAP	15.37	7	9	7	1	527	58.4	5.14
Q13151	Heterogeneous nuclear ribonucleoprotein A0 OS=Homo sapiens GN=HNRNPA0 PE=1 SV=1	28.5246	7	10	5	1	305	30.8	9.29
P23528	Cofilin-1 OS=Homo sapiens GN=CFL1 PE=1 SV=3	42.1687	4	5	4	1	166	18.5	8.09
P49755	Transmembrane emp24 domain-containing protein 10 OS=Homo sapiens GN=TMED10 PE=1 SV=2	25.5708	5	7	5	1	219	25	7.44
Q8WVM8	Sec1 family domain-containing protein 1 OS=Homo sapiens GN=SCFD1 PE=1 SV=4	14.9533	4	5	4	1	642	72.3	6.27
P37802	Isoform 2 of Transgelin-2 OS=Homo sapiens GN=TAGLN2	31.3636	5	7	5	1	220	24.4	8.25
P68400	Casein kinase II subunit alpha OS=Homo sapiens GN=CSNK2A1 PE=1 SV=1	28.6445	6	6	6	1	391	45.1	7.74
Q9BX68	Histidine triad nucleotide-binding protein 2, mitochondrial OS=Homo sapiens GN=HINT2 PE=1 SV=1	47.2393	5	7	5	1	163	17.2	9.16
P00403	Cytochrome c oxidase subunit 2 OS=Homo sapiens GN=MT-CO2 PE=1 SV=1	40.9692	6	8	6	1	227	25.5	4.82
P25325	Isoform 2 of 3-mercaptopyruvate sulfurtransferase OS=Homo sapiens GN=MPST	26.4984	5	6	5	1	317	35.2	6.61
P61247	40S ribosomal protein S3a OS=Homo sapiens GN=RPS3A PE=1 SV=2	32.5758	8	8	8	1	264	29.9	9.73
P62424	60S ribosomal protein L7a OS=Homo sapiens GN=RPL7A PE=1 SV=2	40.9774	9	9	9	1	266	30	10.61
Q13011	Delta(3,5)-Delta(2,4)-dienoyl-CoA isomerase, mitochondrial OS=Homo sapiens GN=ECH1 PE=1 SV=2	22.2561	6	7	6	1	328	35.8	8
P61106	Ras-related protein Rab-14 OS=Homo sapiens GN=RAB14 PE=1 SV=4	30.6977	4	6	3	1	215	23.9	6.21
P24752	Acetyl-CoA acetyltransferase, mitochondrial OS=Homo sapiens GN=ACAT1 PE=1 SV=1	15.6909	5	6	5	1	427	45.2	8.85
P11498	Pyruvate carboxylase, mitochondrial OS=Homo sapiens GN=PC PE=1 SV=2	9.8472	7	8	7	1	1178	129.6	6.84
Q07666	KH domain-containing, RNA-binding, signal transduction-associated protein 1 OS=Homo sapiens GN=KHDRBS1 PE=1 SV=1	19.1874	8	10	7	1	443	48.2	8.66
Q15717	Isoform 2 of ELAV-like protein 1 OS=Homo sapiens GN=ELAVL1	22.0963	5	6	5	1	353	39	9.45
Q13148	TAR DNA-binding protein 43 OS=Homo sapiens GN=TARDBP PE=1 SV=1	21.7391	5	7	5	1	414	44.7	6.19
Q96RP9	Isoform 2 of Elongation factor G, mitochondrial OS=Homo sapiens GN=GFM1	15.0649	6	8	6	1	770	85.8	7.18
Q12906	Isoform 7 of Interleukin enhancer-binding factor 3 OS=Homo sapiens GN=ILF3	13.1403	9	9	9	1	898	95.7	8.81
Q04695	Keratin, type I cytoskeletal 17 OS=Homo sapiens GN=KRT17 PE=1 SV=2	14.3519	10	10	1	1	432	48.1	5.02
Q15363	Transmembrane emp24 domain-containing protein 2 OS=Homo sapiens GN=TMED2 PE=1 SV=1	29.3532	4	8	4	1	201	22.7	5.17
P30050	60S ribosomal protein L12 OS=Homo sapiens GN=RPL12 PE=1 SV=1	49.0909	6	6	6	1	165	17.8	9.42
Q7Z434	Mitochondrial antiviral-signaling protein OS=Homo sapiens GN=MAVS PE=1 SV=2	25	5	6	5	1	540	56.5	5.52
Q9Y277	Isoform 2 of Voltage-dependent anion-selective channel protein 3 OS=Homo sapiens GN=VDAC3	32.7465	7	8	6	1	284	30.8	8.66
P99999	Cytochrome c OS=Homo sapiens GN=CYCS PE=1 SV=2	56.1905	6	7	6	1	105	11.7	9.57
P51149	Ras-related protein Rab-7a OS=Homo sapiens GN=RAB7A PE=1 SV=1	39.6135	7	7	7	1	207	23.5	6.7
P80188	Neutrophil gelatinase-associated lipocalin OS=Homo sapiens GN=LCN2 PE=1 SV=2	44.4444	7	9	7	1	198	22.6	8.91
Q9NX40	OCIA domain-containing protein 1 OS=Homo sapiens GN=OCIAD1 PE=1 SV=1	29.3878	6	7	6	1	245	27.6	7.49
Q08257	Quinone oxidoreductase OS=Homo sapiens GN=CRYZ PE=1 SV=1	37.386	7	7	7	1	329	35.2	8.44
Q9HC07	Transmembrane protein 165 OS=Homo sapiens GN=TMEM165 PE=1 SV=1	19.4444	4	5	4	1	324	34.9	7.02
P07900	Isoform 2 of Heat shock protein HSP 90-alpha OS=Homo sapiens GN=HSP90AA1	11.2412	8	8	3	1	854	98.1	5.16
Q56VL3	OCIA domain-containing protein 2 OS=Homo sapiens GN=OCIAD2 PE=1 SV=1	42.2078	7	9	7	1	154	16.9	9.03
Q5JPE7	Nodal modulator 2 OS=Homo sapiens GN=NOMO2 PE=1 SV=1	7.34017	6	7	6	1	1267	139.4	5.76
Q96AE4	Isoform 2 of Far upstream element-binding protein 1 OS=Homo sapiens GN=FUBP1	12.8637	8	9	5	1	653	68.6	7.31
P21964	Catechol O-methyltransferase OS=Homo sapiens GN=COMT PE=1 SV=2	29.8893	4	5	4	1	271	30	5.47
O15400	Syntaxin-7 OS=Homo sapiens GN=STX7 PE=1 SV=4	36.7816	5	5	5	1	261	29.8	5.55
Q8NFJ5	Retinoic acid-induced protein 3 OS=Homo sapiens GN=GPRC5A PE=1 SV=2	22.409	4	5	4	1	357	40.2	8.15
Q8NFV4	Protein ABHD11 OS=Homo sapiens GN=ABHD11 PE=1 SV=1	35.5556	8	9	8	1	315	34.7	9.48
Q9Y639	Neuroplastin OS=Homo sapiens GN=NPTN PE=1 SV=2	17.3367	5	5	5	1	398	44.4	7.99
P30042	ES1 protein homolog, mitochondrial OS=Homo sapiens GN=C21orf33 PE=1 SV=3	45.1493	7	8	7	1	268	28.2	8.27
P08754	Guanine nucleotide-binding protein G(k) subunit alpha OS=Homo sapiens GN=GNAI3 PE=1 SV=3	24.8588	6	6	2	1	354	40.5	5.69
O75396	Vesicle-trafficking protein SEC22b OS=Homo sapiens GN=SEC22B PE=1 SV=4	34.4186	6	7	6	1	215	24.6	6.92
Q9GZT3	SRA stem-loop-interacting RNA-binding protein, mitochondrial OS=Homo sapiens GN=SLIRP PE=1 SV=1	77.9817	7	7	7	1	109	12.3	10.24
P53367	Arfaptin-1 OS=Homo sapiens GN=ARFIP1 PE=1 SV=2	19.3029	4	5	4	1	373	41.7	6.7
Q96JJ7	Protein disulfide-isomerase TMX3 OS=Homo sapiens GN=TMX3 PE=1 SV=2	18.9427	6	7	6	1	454	51.8	4.91
O96005	Cleft lip and palate transmembrane protein 1 OS=Homo sapiens GN=CLPTM1 PE=1 SV=1	11.8087	4	5	4	1	669	76	6.3
Q9Y5L4	Mitochondrial import inner membrane translocase subunit Tim13 OS=Homo sapiens GN=TIMM13 PE=1 SV=1	42.1053	3	5	3	1	95	10.5	8.18
Q643R3	Lysophospholipid acyltransferase LPCAT4 OS=Homo sapiens GN=LPCAT4 PE=1 SV=1	26.3359	6	6	6	1	524	57.2	8.97
P20674	Cytochrome c oxidase subunit 5A, mitochondrial OS=Homo sapiens GN=COX5A PE=1 SV=2	46	6	8	6	1	150	16.8	6.79
P01116	Isoform 2B of GTPase KRas OS=Homo sapiens GN=KRAS	40.4255	4	5	4	1	188	21.4	8.12
P11166	Solute carrier family 2, facilitated glucose transporter member 1 OS=Homo sapiens GN=SLC2A1 PE=1 SV=2	19.3089	6	7	6	1	492	54	8.72
Q8TCT9	Minor histocompatibility antigen H13 OS=Homo sapiens GN=HM13 PE=1 SV=1	20.4244	5	6	5	1	377	41.5	6.43
Q9UBV2	Protein sel-1 homolog 1 OS=Homo sapiens GN=SEL1L PE=1 SV=3	13.0982	5	6	5	1	794	88.7	5.39
O60488	Long-chain-fatty-acid--CoA ligase 4 OS=Homo sapiens GN=ACSL4 PE=1 SV=2	15.6118	7	8	5	1	711	79.1	8.38
P08574	Cytochrome c1, heme protein, mitochondrial OS=Homo sapiens GN=CYC1 PE=1 SV=3	33.5385	6	7	6	1	325	35.4	9
P48735	Isocitrate dehydrogenase [NADP], mitochondrial OS=Homo sapiens GN=IDH2 PE=1 SV=2	14.1593	5	5	5	1	452	50.9	8.69
O75489	NADH dehydrogenase [ubiquinone] iron-sulfur protein 3, mitochondrial OS=Homo sapiens GN=NDUFS3 PE=1 SV=1	26.8939	5	7	5	1	264	30.2	7.5
Q7Z7H5	Transmembrane emp24 domain-containing protein 4 OS=Homo sapiens GN=TMED4 PE=1 SV=1	18.5022	4	6	2	1	227	25.9	8.28
P11234	Isoform 2 of Ras-related protein Ral-B OS=Homo sapiens GN=RALB	25.8772	7	7	5	1	228	26	7.81
O75381	Peroxisomal membrane protein PEX14 OS=Homo sapiens GN=PEX14 PE=1 SV=1	25.7294	6	6	6	1	377	41.2	4.94
P02545	Prelamin-A/C OS=Homo sapiens GN=LMNA PE=1 SV=1	14.9096	8	9	7	1	664	74.1	7.02
P53597	Succinate--CoA ligase [ADP/GDP-forming] subunit alpha, mitochondrial OS=Homo sapiens GN=SUCLG1 PE=1 SV=4	23.9884	7	7	7	1	346	36.2	8.79
Q15365	Poly(rC)-binding protein 1 OS=Homo sapiens GN=PCBP1 PE=1 SV=2	23.5955	5	6	4	1	356	37.5	7.09
Q16629	Serine/arginine-rich splicing factor 7 OS=Homo sapiens GN=SRSF7 PE=1 SV=1	25.2101	6	6	5	1	238	27.4	11.82
P30040	Endoplasmic reticulum resident protein 29 OS=Homo sapiens GN=ERP29 PE=1 SV=4	44.8276	8	10	8	1	261	29	7.31
P30405	Peptidyl-prolyl cis-trans isomerase F, mitochondrial OS=Homo sapiens GN=PPIF PE=1 SV=1	37.1981	5	6	5	1	207	22	9.38
Q14573	Inositol 1,4,5-trisphosphate receptor type 3 OS=Homo sapiens GN=ITPR3 PE=1 SV=2	4.60502	5	5	5	1	2671	303.9	6.48
Q9UL25	Ras-related protein Rab-21 OS=Homo sapiens GN=RAB21 PE=1 SV=3	27.5556	5	5	5	1	225	24.3	7.94
P68363	Tubulin alpha-1B chain OS=Homo sapiens GN=TUBA1B PE=1 SV=1	13.5255	4	7	4	1	451	50.1	5.06
Q9BUP3	Isoform 3 of Oxidoreductase HTATIP2 OS=Homo sapiens GN=HTATIP2	31.1594	5	6	5	1	276	30.1	8.38
P26368	Splicing factor U2AF 65 kDa subunit OS=Homo sapiens GN=U2AF2 PE=1 SV=4	17.4737	5	6	5	1	475	53.5	9.09
P62888	60S ribosomal protein L30 OS=Homo sapiens GN=RPL30 PE=1 SV=2	47.8261	4	5	4	1	115	12.8	9.63
Q16740	ATP-dependent Clp protease proteolytic subunit, mitochondrial OS=Homo sapiens GN=CLPP PE=1 SV=1	29.6029	7	7	7	1	277	30.2	8.09
O75947	ATP synthase subunit d, mitochondrial OS=Homo sapiens GN=ATP5H PE=1 SV=3	46.5839	5	8	5	1	161	18.5	5.3
Q15388	Mitochondrial import receptor subunit TOM20 homolog OS=Homo sapiens GN=TOMM20 PE=1 SV=1	44.1379	3	4	3	1	145	16.3	8.6
Q15836	Vesicle-associated membrane protein 3 OS=Homo sapiens GN=VAMP3 PE=1 SV=3	40	4	5	4	1	100	11.3	8.79
Q86XR7	Isoform 2 of TIR domain-containing adapter molecule 2 OS=Homo sapiens GN=TICAM2	15.8416	5	6	5	1	404	46.1	5.12
P62081	40S ribosomal protein S7 OS=Homo sapiens GN=RPS7 PE=1 SV=1	46.9072	6	6	6	1	194	22.1	10.1
Q8NBJ4	Golgi membrane protein 1 OS=Homo sapiens GN=GOLM1 PE=1 SV=1	19.4514	6	6	6	1	401	45.3	4.97
P08174	Isoform 7 of Complement decay-accelerating factor OS=Homo sapiens GN=CD55	10.7078	4	5	4	1	551	59	8.78
Q9H3Z4	DnaJ homolog subfamily C member 5 OS=Homo sapiens GN=DNAJC5 PE=1 SV=1	33.3333	4	6	4	1	198	22.1	5.07
Q96LJ7	Dehydrogenase/reductase SDR family member 1 OS=Homo sapiens GN=DHRS1 PE=1 SV=1	20.7668	3	3	3	1	313	33.9	7.83
Q04837	Single-stranded DNA-binding protein, mitochondrial OS=Homo sapiens GN=SSBP1 PE=1 SV=1	41.2162	6	7	6	1	148	17.2	9.6
P63000	Ras-related C3 botulinum toxin substrate 1 OS=Homo sapiens GN=RAC1 PE=1 SV=1	36.9792	5	7	2	1	192	21.4	8.5
P08238	Heat shock protein HSP 90-beta OS=Homo sapiens GN=HSP90AB1 PE=1 SV=4	10.4972	7	7	1	1	724	83.2	5.03
Q10567	AP-1 complex subunit beta-1 OS=Homo sapiens GN=AP1B1 PE=1 SV=2	8.1138	5	6	2	1	949	104.6	5.06
Q7KZF4	Staphylococcal nuclease domain-containing protein 1 OS=Homo sapiens GN=SND1 PE=1 SV=1	14.8352	6	6	6	1	910	101.9	7.17
Q9UBS4	DnaJ homolog subfamily B member 11 OS=Homo sapiens GN=DNAJB11 PE=1 SV=1	19.5531	4	5	4	1	358	40.5	6.18
Q9BXW7	Cat eye syndrome critical region protein 5 OS=Homo sapiens GN=CECR5 PE=1 SV=1	20.5674	5	5	5	1	423	46.3	8.13
Q9H3N1	Thioredoxin-related transmembrane protein 1 OS=Homo sapiens GN=TMX1 PE=1 SV=1	20	6	7	6	1	280	31.8	4.98
Q5QNW6	Isoform 2 of Histone H2B type 2-F OS=Homo sapiens GN=HIST2H2BF	44.0299	7	8	7	1	134	14.8	10.35
P52815	39S ribosomal protein L12, mitochondrial OS=Homo sapiens GN=MRPL12 PE=1 SV=2	45.4545	5	5	5	1	198	21.3	8.87
P31949	Protein S100-A11 OS=Homo sapiens GN=S100A11 PE=1 SV=2	64.7619	4	6	4	1	105	11.7	7.12
P35914	Hydroxymethylglutaryl-CoA lyase, mitochondrial OS=Homo sapiens GN=HMGCL PE=1 SV=2	19.6923	6	6	6	1	325	34.3	8.54
O15127	Secretory carrier-associated membrane protein 2 OS=Homo sapiens GN=SCAMP2 PE=1 SV=2	13.6778	3	5	3	1	329	36.6	6.1
Q9H845	Acyl-CoA dehydrogenase family member 9, mitochondrial OS=Homo sapiens GN=ACAD9 PE=1 SV=1	8.21256	3	3	3	1	621	68.7	7.96
Q96I24	Far upstream element-binding protein 3 OS=Homo sapiens GN=FUBP3 PE=1 SV=2	12.2378	4	5	2	1	572	61.6	8.38
Q14435	Polypeptide N-acetylgalactosaminyltransferase 3 OS=Homo sapiens GN=GALNT3 PE=1 SV=2	13.4281	4	4	4	1	633	72.6	7.99
A1L0T0	Acetolactate synthase-like protein OS=Homo sapiens GN=ILVBL PE=1 SV=2	11.2342	4	4	4	1	632	67.8	8.15
P04908	Histone H2A type 1-B/E OS=Homo sapiens GN=HIST1H2AB PE=1 SV=2	26.9231	3	5	3	1	130	14.1	11.05
P28838	Cytosol aminopeptidase OS=Homo sapiens GN=LAP3 PE=1 SV=3	13.4875	4	4	4	1	519	56.1	7.93
Q96I99	Succinate--CoA ligase [GDP-forming] subunit beta, mitochondrial OS=Homo sapiens GN=SUCLG2 PE=1 SV=2	19.4444	7	8	7	1	432	46.5	6.39
P11177	Pyruvate dehydrogenase E1 component subunit beta, mitochondrial OS=Homo sapiens GN=PDHB PE=1 SV=3	21.727	5	5	5	1	359	39.2	6.65
P46459	Vesicle-fusing ATPase OS=Homo sapiens GN=NSF PE=1 SV=3	8.87097	6	6	6	1	744	82.5	6.95
P04062	Glucosylceramidase OS=Homo sapiens GN=GBA PE=1 SV=3	14.3657	5	5	5	1	536	59.7	7.61
P84243	Histone H3.3 OS=Homo sapiens GN=H3F3A PE=1 SV=2	40.4412	4	5	1	1	136	15.3	11.27
Q1KMD3	Heterogeneous nuclear ribonucleoprotein U-like protein 2 OS=Homo sapiens GN=HNRNPUL2 PE=1 SV=1	10.174	5	6	5	1	747	85.1	4.91
P04075	Isoform 2 of Fructose-bisphosphate aldolase A OS=Homo sapiens GN=ALDOA	24.6411	8	8	8	1	418	45.2	8.25
P21912	Succinate dehydrogenase [ubiquinone] iron-sulfur subunit, mitochondrial OS=Homo sapiens GN=SDHB PE=1 SV=3	20.7143	5	5	5	1	280	31.6	8.76
P31942	Heterogeneous nuclear ribonucleoprotein H3 OS=Homo sapiens GN=HNRNPH3 PE=1 SV=2	16.185	4	5	4	1	346	36.9	6.87
Q07020	60S ribosomal protein L18 OS=Homo sapiens GN=RPL18 PE=1 SV=2	31.383	5	6	5	1	188	21.6	11.72
Q92544	Transmembrane 9 superfamily member 4 OS=Homo sapiens GN=TM9SF4 PE=1 SV=2	8.72274	4	4	4	1	642	74.5	6.54
P10606	Cytochrome c oxidase subunit 5B, mitochondrial OS=Homo sapiens GN=COX5B PE=1 SV=2	39.5349	4	6	4	1	129	13.7	8.81
Q9HCY8	Protein S100-A14 OS=Homo sapiens GN=S100A14 PE=1 SV=1	72.1154	6	6	6	1	104	11.7	5.24
O95197	Isoform 3 of Reticulon-3 OS=Homo sapiens GN=RTN3	17.7966	4	6	4	1	236	25.6	8.51
P23634	Plasma membrane calcium-transporting ATPase 4 OS=Homo sapiens GN=ATP2B4 PE=1 SV=2	4.59307	5	5	5	1	1241	137.8	6.6
P15153	Ras-related C3 botulinum toxin substrate 2 OS=Homo sapiens GN=RAC2 PE=1 SV=1	34.375	6	8	3	1	192	21.4	7.61
P15880	40S ribosomal protein S2 OS=Homo sapiens GN=RPS2 PE=1 SV=2	18.0887	5	6	5	1	293	31.3	10.24
Q8NF37	Lysophosphatidylcholine acyltransferase 1 OS=Homo sapiens GN=LPCAT1 PE=1 SV=2	9.55056	3	3	3	1	534	59.1	6.02
Q53GQ0	Very-long-chain 3-oxoacyl-CoA reductase OS=Homo sapiens GN=HSD17B12 PE=1 SV=2	21.7949	5	6	5	1	312	34.3	9.32
P62136	Isoform 2 of Serine/threonine-protein phosphatase PP1-alpha catalytic subunit OS=Homo sapiens GN=PPP1CA	14.3695	3	5	3	1	341	38.6	6.62
P18124	60S ribosomal protein L7 OS=Homo sapiens GN=RPL7 PE=1 SV=1	22.1774	4	5	4	1	248	29.2	10.65
O95782	AP-2 complex subunit alpha-1 OS=Homo sapiens GN=AP2A1 PE=1 SV=3	7.47185	3	5	2	1	977	107.5	7.03
P09429	High mobility group protein B1 OS=Homo sapiens GN=HMGB1 PE=1 SV=3	21.8605	5	5	5	1	215	24.9	5.74
Q53H12	Acylglycerol kinase, mitochondrial OS=Homo sapiens GN=AGK PE=1 SV=2	16.3507	4	4	4	1	422	47.1	8.09
Q31612	HLA class I histocompatibility antigen, B-73 alpha chain OS=Homo sapiens GN=HLA-B PE=1 SV=1	14.6006	4	6	0	1	363	40.4	6.24
Q9Y282	Isoform 3 of Endoplasmic reticulum-Golgi intermediate compartment protein 3 OS=Homo sapiens GN=ERGIC3	21.9072	5	5	5	1	388	43.7	6.04
Q96C01	Protein FAM136A OS=Homo sapiens GN=FAM136A PE=1 SV=1	38.4058	5	5	5	1	138	15.6	7.61
P30038	Delta-1-pyrroline-5-carboxylate dehydrogenase, mitochondrial OS=Homo sapiens GN=ALDH4A1 PE=1 SV=3	10.8348	4	5	4	1	563	61.7	8.07
Q8NBX0	Saccharopine dehydrogenase-like oxidoreductase OS=Homo sapiens GN=SCCPDH PE=1 SV=1	17.7156	6	7	6	1	429	47.1	9.14
P42892	Endothelin-converting enzyme 1 OS=Homo sapiens GN=ECE1 PE=1 SV=2	9.35065	3	4	3	1	770	87.1	5.88
P62937	Peptidyl-prolyl cis-trans isomerase A OS=Homo sapiens GN=PPIA PE=1 SV=2	36.3636	5	5	5	1	165	18	7.81
Q10471	Polypeptide N-acetylgalactosaminyltransferase 2 OS=Homo sapiens GN=GALNT2 PE=1 SV=1	11.0333	5	5	5	1	571	64.7	8.35
P26006	Isoform 2 of Integrin alpha-3 OS=Homo sapiens GN=ITGA3	6.09756	6	6	6	1	1066	118.7	6.96
Q2WGJ9	Fer-1-like protein 6 OS=Homo sapiens GN=FER1L6 PE=2 SV=2	3.93107	3	3	3	1	1857	209.2	6.38
P62701	40S ribosomal protein S4, X isoform OS=Homo sapiens GN=RPS4X PE=1 SV=2	24.7148	6	6	6	1	263	29.6	10.15
P13987	CD59 glycoprotein OS=Homo sapiens GN=CD59 PE=1 SV=1	25	3	5	3	1	128	14.2	6.48
P48960	CD97 antigen OS=Homo sapiens GN=CD97 PE=1 SV=4	8.02395	4	4	4	1	835	91.8	6.87
P24539	ATP synthase F(0) complex subunit B1, mitochondrial OS=Homo sapiens GN=ATP5F1 PE=1 SV=2	22.6562	5	7	5	1	256	28.9	9.36
Q15758	Neutral amino acid transporter B(0) OS=Homo sapiens GN=SLC1A5 PE=1 SV=2	9.61183	4	4	4	1	541	56.6	5.48
P23396	Isoform 2 of 40S ribosomal protein S3 OS=Homo sapiens GN=RPS3	23.5521	6	6	6	1	259	28.5	9.73
P84103	Serine/arginine-rich splicing factor 3 OS=Homo sapiens GN=SRSF3 PE=1 SV=1	31.7073	6	6	5	1	164	19.3	11.65
Q06830	Peroxiredoxin-1 OS=Homo sapiens GN=PRDX1 PE=1 SV=1	30.1508	5	5	5	1	199	22.1	8.13
P04899	Isoform sGi2 of Guanine nucleotide-binding protein G(i) subunit alpha-2 OS=Homo sapiens GN=GNAI2	15.3005	5	5	1	1	366	41.5	5.99
Q9H190	Syntenin-2 OS=Homo sapiens GN=SDCBP2 PE=1 SV=2	14.3836	4	4	4	1	292	31.6	9.07
O00116	Alkyldihydroxyacetonephosphate synthase, peroxisomal OS=Homo sapiens GN=AGPS PE=1 SV=1	10.0304	3	3	3	1	658	72.9	7.34
Q13740	CD166 antigen OS=Homo sapiens GN=ALCAM PE=1 SV=2	12.5214	5	6	5	1	583	65.1	6.25
Q96GC9	Vacuole membrane protein 1 OS=Homo sapiens GN=VMP1 PE=1 SV=1	13.0542	3	3	3	1	406	46.2	6.95
P61769	Beta-2-microglobulin OS=Homo sapiens GN=B2M PE=1 SV=1	35.2941	3	5	3	1	119	13.7	6.52
P43897	Elongation factor Ts, mitochondrial OS=Homo sapiens GN=TSFM PE=1 SV=2	16.6154	3	3	3	1	325	35.4	8.38
Q99805	Transmembrane 9 superfamily member 2 OS=Homo sapiens GN=TM9SF2 PE=1 SV=1	9.2006	4	4	4	1	663	75.7	7.44
Q92804	TATA-binding protein-associated factor 2N OS=Homo sapiens GN=TAF15 PE=1 SV=1	15.5405	5	5	2	1	592	61.8	8.02
O60568	Procollagen-lysine,2-oxoglutarate 5-dioxygenase 3 OS=Homo sapiens GN=PLOD3 PE=1 SV=1	8.94309	3	3	3	1	738	84.7	6.05
P63104	14-3-3 protein zeta/delta OS=Homo sapiens GN=YWHAZ PE=1 SV=1	17.9592	3	4	3	1	245	27.7	4.79
O75027	Isoform 2 of ATP-binding cassette sub-family B member 7, mitochondrial OS=Homo sapiens GN=ABCB7	12.8818	3	4	3	1	753	82.7	9.33
P00338	Isoform 3 of L-lactate dehydrogenase A chain OS=Homo sapiens GN=LDHA	13.2964	3	3	3	1	361	39.8	8.43
Q9BSH4	Translational activator of cytochrome c oxidase 1 OS=Homo sapiens GN=TACO1 PE=1 SV=1	21.5488	3	5	3	1	297	32.5	8.13
Q13263	Transcription intermediary factor 1-beta OS=Homo sapiens GN=TRIM28 PE=1 SV=5	8.74251	2	2	2	1	835	88.5	5.77
Q9Y624	Junctional adhesion molecule A OS=Homo sapiens GN=F11R PE=1 SV=1	20.7358	5	5	5	1	299	32.6	7.9
P13073	Cytochrome c oxidase subunit 4 isoform 1, mitochondrial OS=Homo sapiens GN=COX4I1 PE=1 SV=1	30.7692	4	5	4	1	169	19.6	9.51
Q9P035	Very-long-chain (3R)-3-hydroxyacyl-CoA dehydratase 3 OS=Homo sapiens GN=HACD3 PE=1 SV=2	16.0221	4	4	4	1	362	43.1	8.94
Q8NI22	Multiple coagulation factor deficiency protein 2 OS=Homo sapiens GN=MCFD2 PE=1 SV=1	28.0822	2	4	2	1	146	16.4	4.63
Q96FQ6	Protein S100-A16 OS=Homo sapiens GN=S100A16 PE=1 SV=1	41.7476	3	5	3	1	103	11.8	6.79
Q8NC51	Plasminogen activator inhibitor 1 RNA-binding protein OS=Homo sapiens GN=SERBP1 PE=1 SV=2	16.4216	5	6	5	1	408	44.9	8.65
Q5XXA6	Anoctamin-1 OS=Homo sapiens GN=ANO1 PE=1 SV=1	4.0568	4	5	4	1	986	114	8.54
P62987	Ubiquitin-60S ribosomal protein L40 OS=Homo sapiens GN=UBA52 PE=1 SV=2	43.75	6	7	6	1	128	14.7	9.83
Q02978	Mitochondrial 2-oxoglutarate/malate carrier protein OS=Homo sapiens GN=SLC25A11 PE=1 SV=3	12.7389	3	3	3	1	314	34	9.91
P00167	Cytochrome b5 OS=Homo sapiens GN=CYB5A PE=1 SV=2	43.2836	5	6	5	1	134	15.3	4.96
Q96N66	Lysophospholipid acyltransferase 7 OS=Homo sapiens GN=MBOAT7 PE=1 SV=2	13.3475	4	6	4	1	472	52.7	8.97
Q6YN16	Hydroxysteroid dehydrogenase-like protein 2 OS=Homo sapiens GN=HSDL2 PE=1 SV=1	8.85167	2	2	2	1	418	45.4	7.99
P09543	2',3'-cyclic-nucleotide 3'-phosphodiesterase OS=Homo sapiens GN=CNP PE=1 SV=2	17.5772	3	3	3	1	421	47.5	9.07
P68371	Tubulin beta-4B chain OS=Homo sapiens GN=TUBB4B PE=1 SV=1	9.66292	2	3	2	1	445	49.8	4.89
P51970	NADH dehydrogenase [ubiquinone] 1 alpha subcomplex subunit 8 OS=Homo sapiens GN=NDUFA8 PE=1 SV=3	33.7209	4	4	4	1	172	20.1	7.65
P13995	Bifunctional methylenetetrahydrofolate dehydrogenase/cyclohydrolase, mitochondrial OS=Homo sapiens GN=MTHFD2 PE=1 SV=2	13.4286	2	2	2	1	350	37.9	8.73
Q9Y6H1	Coiled-coil-helix-coiled-coil-helix domain-containing protein 2 OS=Homo sapiens GN=CHCHD2 PE=1 SV=1	33.7748	3	3	3	1	151	15.5	9.22
Q08477	Docosahexaenoic acid omega-hydroxylase CYP4F3 OS=Homo sapiens GN=CYP4F3 PE=1 SV=2	10.1923	3	3	2	1	520	59.8	7.64
Q9NZ45	CDGSH iron-sulfur domain-containing protein 1 OS=Homo sapiens GN=CISD1 PE=1 SV=1	25.9259	2	3	2	1	108	12.2	9.09
P02768	Serum albumin OS=Homo sapiens GN=ALB PE=1 SV=2	7.06076	4	5	4	1	609	69.3	6.28
P29692	Isoform 2 of Elongation factor 1-delta OS=Homo sapiens GN=EEF1D	7.41886	3	3	3	1	647	71.4	6.42
P51659	Isoform 2 of Peroxisomal multifunctional enzyme type 2 OS=Homo sapiens GN=HSD17B4	8.93561	3	3	3	1	761	83	8.76
P50914	60S ribosomal protein L14 OS=Homo sapiens GN=RPL14 PE=1 SV=4	19.0698	4	5	4	1	215	23.4	10.93
P62917	60S ribosomal protein L8 OS=Homo sapiens GN=RPL8 PE=1 SV=2	31.1284	6	6	6	1	257	28	11.03
P78527	DNA-dependent protein kinase catalytic subunit OS=Homo sapiens GN=PRKDC PE=1 SV=3	1.57461	2	2	2	1	4128	468.8	7.12
P84098	60S ribosomal protein L19 OS=Homo sapiens GN=RPL19 PE=1 SV=1	17.3469	3	4	3	1	196	23.5	11.47
P61353	60S ribosomal protein L27 OS=Homo sapiens GN=RPL27 PE=1 SV=2	32.3529	4	5	4	1	136	15.8	10.56
P62318	Small nuclear ribonucleoprotein Sm D3 OS=Homo sapiens GN=SNRPD3 PE=1 SV=1	24.6032	2	3	2	1	126	13.9	10.32
Q14696	LDLR chaperone MESD OS=Homo sapiens GN=MESDC2 PE=1 SV=2	12.8205	2	3	2	1	234	26.1	7.78
P26885	Peptidyl-prolyl cis-trans isomerase FKBP2 OS=Homo sapiens GN=FKBP2 PE=1 SV=2	25.3521	4	5	4	1	142	15.6	9.13
P46779	60S ribosomal protein L28 OS=Homo sapiens GN=RPL28 PE=1 SV=3	33.5766	6	7	6	1	137	15.7	12.02
O43615	Mitochondrial import inner membrane translocase subunit TIM44 OS=Homo sapiens GN=TIMM44 PE=1 SV=2	11.5044	4	4	4	1	452	51.3	8.32
Q96RQ3	Methylcrotonoyl-CoA carboxylase subunit alpha, mitochondrial OS=Homo sapiens GN=MCCC1 PE=1 SV=3	6.62069	3	3	3	1	725	80.4	7.78
P11279	Lysosome-associated membrane glycoprotein 1 OS=Homo sapiens GN=LAMP1 PE=1 SV=3	8.39329	3	5	3	1	417	44.9	8.75
Q15637	Isoform 5 of Splicing factor 1 OS=Homo sapiens GN=SF1	4.60624	2	3	2	1	673	71.7	9.58
P51571	Translocon-associated protein subunit delta OS=Homo sapiens GN=SSR4 PE=1 SV=1	17.9191	3	4	3	1	173	19	6.15
O75208	Ubiquinone biosynthesis protein COQ9, mitochondrial OS=Homo sapiens GN=COQ9 PE=1 SV=1	23.8994	4	4	4	1	318	35.5	5.94
Q9NS69	Mitochondrial import receptor subunit TOM22 homolog OS=Homo sapiens GN=TOMM22 PE=1 SV=3	33.8028	3	3	3	1	142	15.5	4.34
Q8N183	Mimitin, mitochondrial OS=Homo sapiens GN=NDUFAF2 PE=1 SV=1	28.4024	3	4	3	1	169	19.8	8.97
Q9UN76	Sodium- and chloride-dependent neutral and basic amino acid transporter B(0+) OS=Homo sapiens GN=SLC6A14 PE=2 SV=1	6.23053	3	4	3	1	642	72.1	8.19
Q6NUM9	All-trans-retinol 13,14-reductase OS=Homo sapiens GN=RETSAT PE=1 SV=2	7.04918	3	4	3	1	610	66.8	8.28
Q6NT52	Choriogonadotropin subunit beta variant 2 OS=Homo sapiens GN=CGB2 PE=2 SV=4	22.5641	4	5	4	1	195	21.2	8.37
Q9Y2Q3	Glutathione S-transferase kappa 1 OS=Homo sapiens GN=GSTK1 PE=1 SV=3	22.5664	3	3	3	1	226	25.5	8.41
Q15366	Isoform 2 of Poly(rC)-binding protein 2 OS=Homo sapiens GN=PCBP2	13.9344	4	4	3	1	366	38.6	6.79
P62805	Histone H4 OS=Homo sapiens GN=HIST1H4A PE=1 SV=2	38.835	4	5	4	1	103	11.4	11.36
Q86Y82	Syntaxin-12 OS=Homo sapiens GN=STX12 PE=1 SV=1	14.4928	3	3	3	1	276	31.6	5.59
Q969V3	Nicalin OS=Homo sapiens GN=NCLN PE=1 SV=2	8.52575	3	3	3	1	563	62.9	6.89
P39687	Acidic leucine-rich nuclear phosphoprotein 32 family member A OS=Homo sapiens GN=ANP32A PE=1 SV=1	14.8594	3	4	3	1	249	28.6	4.09
Q92665	28S ribosomal protein S31, mitochondrial OS=Homo sapiens GN=MRPS31 PE=1 SV=3	5.82278	1	2	1	1	395	45.3	9.29
Q11201	CMP-N-acetylneuraminate-beta-galactosamide-alpha-2,3-sialyltransferase 1 OS=Homo sapiens GN=ST3GAL1 PE=2 SV=1	14.7059	3	4	3	1	340	39.1	9.09
P62753	40S ribosomal protein S6 OS=Homo sapiens GN=RPS6 PE=1 SV=1	21.2851	5	5	5	1	249	28.7	10.84
Q14126	Desmoglein-2 OS=Homo sapiens GN=DSG2 PE=1 SV=2	5.45617	4	4	4	1	1118	122.2	5.24
Q9UGP8	Translocation protein SEC63 homolog OS=Homo sapiens GN=SEC63 PE=1 SV=2	6.44737	3	3	3	1	760	87.9	5.31
P62241	40S ribosomal protein S8 OS=Homo sapiens GN=RPS8 PE=1 SV=2	18.75	3	4	3	1	208	24.2	10.32
Q9UH62	Armadillo repeat-containing X-linked protein 3 OS=Homo sapiens GN=ARMCX3 PE=1 SV=1	13.4565	3	3	3	1	379	42.5	8.37
Q03518	Antigen peptide transporter 1 OS=Homo sapiens GN=TAP1 PE=1 SV=2	10.8911	3	3	3	1	808	87.2	8.02
P04040	Catalase OS=Homo sapiens GN=CAT PE=1 SV=3	10.4364	3	3	3	1	527	59.7	7.39
P46940	Ras GTPase-activating-like protein IQGAP1 OS=Homo sapiens GN=IQGAP1 PE=1 SV=1	4.3452	3	3	3	1	1657	189.1	6.48
Q96IR7	4-hydroxyphenylpyruvate dioxygenase-like protein OS=Homo sapiens GN=HPDL PE=1 SV=1	23.1806	4	4	4	1	371	39.4	7.03
P53007	Tricarboxylate transport protein, mitochondrial OS=Homo sapiens GN=SLC25A1 PE=1 SV=2	21.2219	4	4	4	1	311	34	9.89
P26440	Isovaleryl-CoA dehydrogenase, mitochondrial OS=Homo sapiens GN=IVD PE=1 SV=1	14.1844	4	6	4	1	423	46.3	8.19
Q15599	Na(+)/H(+) exchange regulatory cofactor NHE-RF2 OS=Homo sapiens GN=SLC9A3R2 PE=1 SV=2	13.6499	4	4	4	1	337	37.4	7.93
P42166	Lamina-associated polypeptide 2, isoform alpha OS=Homo sapiens GN=TMPO PE=1 SV=2	9.65418	2	2	2	1	694	75.4	7.66
P62070	Isoform 4 of Ras-related protein R-Ras2 OS=Homo sapiens GN=RRAS2	18.5714	3	4	3	1	210	24.2	6.01
Q92499	ATP-dependent RNA helicase DDX1 OS=Homo sapiens GN=DDX1 PE=1 SV=2	2.83784	1	3	1	1	740	82.4	7.23
Q15907	Ras-related protein Rab-11B OS=Homo sapiens GN=RAB11B PE=1 SV=4	17.4312	4	4	4	1	218	24.5	5.94
Q13586	Stromal interaction molecule 1 OS=Homo sapiens GN=STIM1 PE=1 SV=3	5.69343	2	2	2	1	685	77.4	6.67
P05388	60S acidic ribosomal protein P0 OS=Homo sapiens GN=RPLP0 PE=1 SV=1	20.1893	3	3	3	1	317	34.3	5.97
Q71DI3	Histone H3.2 OS=Homo sapiens GN=HIST2H3A PE=1 SV=3	40.4412	4	5	1	1	136	15.4	11.27
P30049	ATP synthase subunit delta, mitochondrial OS=Homo sapiens GN=ATP5D PE=1 SV=2	41.0714	4	5	4	1	168	17.5	5.49
P46778	60S ribosomal protein L21 OS=Homo sapiens GN=RPL21 PE=1 SV=2	25	3	4	3	1	160	18.6	10.49
Q13247	Serine/arginine-rich splicing factor 6 OS=Homo sapiens GN=SRSF6 PE=1 SV=2	10.7558	4	4	2	1	344	39.6	11.43
P12694	Isoform 2 of 2-oxoisovalerate dehydrogenase subunit alpha, mitochondrial OS=Homo sapiens GN=BCKDHA	8.48214	2	2	2	1	448	50.8	7.15
P35268	60S ribosomal protein L22 OS=Homo sapiens GN=RPL22 PE=1 SV=2	39.0625	3	4	3	1	128	14.8	9.19
Q12959	Isoform 2 of Disks large homolog 1 OS=Homo sapiens GN=DLG1	7.4514	3	3	3	1	926	103.3	5.92
P62158	Calmodulin OS=Homo sapiens GN=CALM1 PE=1 SV=2	22.1477	2	2	2	1	149	16.8	4.22
Q9H936	Mitochondrial glutamate carrier 1 OS=Homo sapiens GN=SLC25A22 PE=1 SV=1	11.1455	3	3	3	1	323	34.4	9.29
Q16134	Electron transfer flavoprotein-ubiquinone oxidoreductase, mitochondrial OS=Homo sapiens GN=ETFDH PE=1 SV=2	6.96921	3	3	3	1	617	68.5	7.55
P33316	Deoxyuridine 5'-triphosphate nucleotidohydrolase, mitochondrial OS=Homo sapiens GN=DUT PE=1 SV=4	13.8889	3	4	3	1	252	26.5	9.36
P11233	Ras-related protein Ral-A OS=Homo sapiens GN=RALA PE=1 SV=1	22.8155	4	4	2	1	206	23.6	7.11
P26641	Isoform 2 of Elongation factor 1-gamma OS=Homo sapiens GN=EEF1G	9.44559	4	4	4	1	487	56.1	7.72
Q969H8	Myeloid-derived growth factor OS=Homo sapiens GN=MYDGF PE=1 SV=1	20.2312	3	4	3	1	173	18.8	6.68
P80303	Nucleobindin-2 OS=Homo sapiens GN=NUCB2 PE=1 SV=2	11.6667	4	4	3	1	420	50.2	5.12
Q96RQ1	Endoplasmic reticulum-Golgi intermediate compartment protein 2 OS=Homo sapiens GN=ERGIC2 PE=1 SV=2	11.6711	3	3	3	1	377	42.5	6.77
Q8N766	ER membrane protein complex subunit 1 OS=Homo sapiens GN=EMC1 PE=1 SV=1	3.92749	2	2	2	1	993	111.7	7.66
P84157	Matrix-remodeling-associated protein 7 OS=Homo sapiens GN=MXRA7 PE=1 SV=1	27.9412	2	2	2	1	204	21.5	4.26
O75363	Isoform 2 of Breast carcinoma-amplified sequence 1 OS=Homo sapiens GN=BCAS1	11.4007	4	4	4	1	614	65.6	6.16
O60762	Dolichol-phosphate mannosyltransferase subunit 1 OS=Homo sapiens GN=DPM1 PE=1 SV=1	13.0769	2	3	2	1	260	29.6	9.57
P62314	Small nuclear ribonucleoprotein Sm D1 OS=Homo sapiens GN=SNRPD1 PE=1 SV=1	27.7311	2	3	2	1	119	13.3	11.56
Q02543	60S ribosomal protein L18a OS=Homo sapiens GN=RPL18A PE=1 SV=2	25.5682	5	5	5	1	176	20.7	10.71
P07919	Cytochrome b-c1 complex subunit 6, mitochondrial OS=Homo sapiens GN=UQCRH PE=1 SV=2	29.6703	2	2	2	1	91	10.7	4.44
Q96BM9	ADP-ribosylation factor-like protein 8A OS=Homo sapiens GN=ARL8A PE=1 SV=1	22.043	2	2	2	1	186	21.4	7.77
P05455	Lupus La protein OS=Homo sapiens GN=SSB PE=1 SV=2	9.80392	3	4	3	1	408	46.8	7.12
P62316	Small nuclear ribonucleoprotein Sm D2 OS=Homo sapiens GN=SNRPD2 PE=1 SV=1	30.5085	3	3	3	1	118	13.5	9.91
P50416	Carnitine O-palmitoyltransferase 1, liver isoform OS=Homo sapiens GN=CPT1A PE=1 SV=2	4.52781	3	3	3	1	773	88.3	8.65
Q7Z7M9	Polypeptide N-acetylgalactosaminyltransferase 5 OS=Homo sapiens GN=GALNT5 PE=1 SV=1	6.17021	4	4	4	1	940	106.2	9.47
Q96GQ5	RUS1 family protein C16orf58 OS=Homo sapiens GN=C16orf58 PE=1 SV=2	10.0427	2	2	2	1	468	51	6.93
Q14980	Nuclear mitotic apparatus protein 1 OS=Homo sapiens GN=NUMA1 PE=1 SV=2	2.22222	2	2	2	1	2115	238.1	5.78
Q6P2I3	Fumarylacetoacetate hydrolase domain-containing protein 2B OS=Homo sapiens GN=FAHD2B PE=1 SV=1	25.1592	4	4	4	1	314	34.6	7.75
P13473	Isoform LAMP-2C of Lysosome-associated membrane glycoprotein 2 OS=Homo sapiens GN=LAMP2	9.24574	4	4	4	1	411	45.1	5.91
O14936	Peripheral plasma membrane protein CASK OS=Homo sapiens GN=CASK PE=1 SV=3	5.50756	2	2	2	1	926	105.1	6.43
P83111	Serine beta-lactamase-like protein LACTB, mitochondrial OS=Homo sapiens GN=LACTB PE=1 SV=2	6.76417	2	3	2	1	547	60.7	8.53
Q12846	Syntaxin-4 OS=Homo sapiens GN=STX4 PE=1 SV=2	17.5084	3	3	3	1	297	34.2	6.28
Q14444	Caprin-1 OS=Homo sapiens GN=CAPRIN1 PE=1 SV=2	6.34697	3	4	3	1	709	78.3	5.25
Q9UIJ7	GTP:AMP phosphotransferase AK3, mitochondrial OS=Homo sapiens GN=AK3 PE=1 SV=4	22.0264	4	4	4	1	227	25.6	9.16
P09382	Galectin-1 OS=Homo sapiens GN=LGALS1 PE=1 SV=2	37.7778	5	5	5	1	135	14.7	5.5
O14979	Heterogeneous nuclear ribonucleoprotein D-like OS=Homo sapiens GN=HNRNPDL PE=1 SV=3	8.09524	4	5	2	1	420	46.4	9.57
Q9NVH1	DnaJ homolog subfamily C member 11 OS=Homo sapiens GN=DNAJC11 PE=1 SV=2	6.79785	2	2	2	1	559	63.2	8.4
Q8TC12	Retinol dehydrogenase 11 OS=Homo sapiens GN=RDH11 PE=1 SV=2	14.1509	3	3	3	1	318	35.4	8.82
Q96A26	Protein FAM162A OS=Homo sapiens GN=FAM162A PE=1 SV=2	24.026	4	5	4	1	154	17.3	9.77
Q96S97	Myeloid-associated differentiation marker OS=Homo sapiens GN=MYADM PE=1 SV=2	19.5652	3	3	3	1	322	35.3	8.15
Q9NP72	Ras-related protein Rab-18 OS=Homo sapiens GN=RAB18 PE=1 SV=1	17.9612	3	3	3	1	206	23	5.24
O00469	Isoform 2 of Procollagen-lysine,2-oxoglutarate 5-dioxygenase 2 OS=Homo sapiens GN=PLOD2	4.88127	2	3	2	1	758	87	6.71
Q9Y3E5	Peptidyl-tRNA hydrolase 2, mitochondrial OS=Homo sapiens GN=PTRH2 PE=1 SV=1	21.2291	2	2	2	1	179	19.2	8.73
P46783	40S ribosomal protein S10 OS=Homo sapiens GN=RPS10 PE=1 SV=1	14.5455	2	2	2	1	165	18.9	10.15
Q13443	Disintegrin and metalloproteinase domain-containing protein 9 OS=Homo sapiens GN=ADAM9 PE=1 SV=1	5.25031	3	3	3	1	819	90.5	7.52
Q9H4G0	Band 4.1-like protein 1 OS=Homo sapiens GN=EPB41L1 PE=1 SV=2	5.33485	3	3	3	1	881	98.4	5.62
Q9NRG7	Isoform 2 of Epimerase family protein SDR39U1 OS=Homo sapiens GN=SDR39U1	12.628	2	4	2	1	293	31.1	9.04
P62910	60S ribosomal protein L32 OS=Homo sapiens GN=RPL32 PE=1 SV=2	20	3	4	3	1	135	15.9	11.33
Q16563	Synaptophysin-like protein 1 OS=Homo sapiens GN=SYPL1 PE=1 SV=1	19.6911	3	3	3	1	259	28.5	8.43
Q96EP5	DAZ-associated protein 1 OS=Homo sapiens GN=DAZAP1 PE=1 SV=1	12.7764	3	3	3	1	407	43.4	8.56
P27635	60S ribosomal protein L10 OS=Homo sapiens GN=RPL10 PE=1 SV=4	17.757	3	3	3	1	214	24.6	10.08
P28331	Isoform 2 of NADH-ubiquinone oxidoreductase 75 kDa subunit, mitochondrial OS=Homo sapiens GN=NDUFS1	8.36707	4	4	4	1	741	80.9	6.64
Q9NUJ1	Mycophenolic acid acyl-glucuronide esterase, mitochondrial OS=Homo sapiens GN=ABHD10 PE=1 SV=1	12.4183	2	2	2	1	306	33.9	8.57
P46777	60S ribosomal protein L5 OS=Homo sapiens GN=RPL5 PE=1 SV=3	14.8148	4	4	4	1	297	34.3	9.72
P17931	Galectin-3 OS=Homo sapiens GN=LGALS3 PE=1 SV=5	12.8	3	3	3	1	250	26.1	8.56
Q9H1C4	Protein unc-93 homolog B1 OS=Homo sapiens GN=UNC93B1 PE=1 SV=2	5.02513	2	2	2	1	597	66.6	6.96
Q9Y394	Dehydrogenase/reductase SDR family member 7 OS=Homo sapiens GN=DHRS7 PE=1 SV=1	17.9941	3	4	3	1	339	38.3	8.32
Q9BUR5	MICOS complex subunit MIC26 OS=Homo sapiens GN=APOO PE=1 SV=1	25.7576	3	4	3	1	198	22.3	9.13
Q15005	Signal peptidase complex subunit 2 OS=Homo sapiens GN=SPCS2 PE=1 SV=3	12.8319	2	2	2	1	226	25	8.47
O15321	Transmembrane 9 superfamily member 1 OS=Homo sapiens GN=TM9SF1 PE=2 SV=2	7.59076	3	3	3	1	606	68.8	7.17
P01911	HLA class II histocompatibility antigen, DRB1-15 beta chain OS=Homo sapiens GN=HLA-DRB1 PE=1 SV=2	15.0376	2	2	2	1	266	29.9	7.74
P16401	Histone H1.5 OS=Homo sapiens GN=HIST1H1B PE=1 SV=3	10.6195	3	3	3	1	226	22.6	10.92
Q99497	Protein deglycase DJ-1 OS=Homo sapiens GN=PARK7 PE=1 SV=2	21.6931	3	3	3	1	189	19.9	6.79
P19404	NADH dehydrogenase [ubiquinone] flavoprotein 2, mitochondrial OS=Homo sapiens GN=NDUFV2 PE=1 SV=2	17.2691	3	3	3	1	249	27.4	8.06
Q9ULV4	Isoform 3 of Coronin-1C OS=Homo sapiens GN=CORO1C	9.29791	2	2	2	1	527	58.9	7.75
P62854	40S ribosomal protein S26 OS=Homo sapiens GN=RPS26 PE=1 SV=3	23.4783	2	2	2	1	115	13	11
Q13057	Isoform 2 of Bifunctional coenzyme A synthase OS=Homo sapiens GN=COASY	9.44351	2	3	2	1	593	65.3	7.64
Q86UE4	Protein LYRIC OS=Homo sapiens GN=MTDH PE=1 SV=2	9.96564	3	4	3	1	582	63.8	9.32
O60220	Mitochondrial import inner membrane translocase subunit Tim8 A OS=Homo sapiens GN=TIMM8A PE=1 SV=1	46.3918	4	4	4	1	97	11	5.16
Q92896	Isoform 2 of Golgi apparatus protein 1 OS=Homo sapiens GN=GLG1	3.5744	3	3	3	1	1203	137.1	6.9
Q86WV6	Stimulator of interferon genes protein OS=Homo sapiens GN=TMEM173 PE=1 SV=1	9.49868	2	3	2	1	379	42.2	7.05
Q13084	39S ribosomal protein L28, mitochondrial OS=Homo sapiens GN=MRPL28 PE=1 SV=4	18.3594	2	2	2	1	256	30.1	8.29
Q86SX6	Glutaredoxin-related protein 5, mitochondrial OS=Homo sapiens GN=GLRX5 PE=1 SV=2	15.9236	2	3	2	1	157	16.6	6.79
O75844	CAAX prenyl protease 1 homolog OS=Homo sapiens GN=ZMPSTE24 PE=1 SV=2	9.05263	3	3	3	1	475	54.8	7.49
Q9H553	Alpha-1,3/1,6-mannosyltransferase ALG2 OS=Homo sapiens GN=ALG2 PE=1 SV=1	11.2981	3	3	3	1	416	47.1	7.05
Q9NX62	Inositol monophosphatase 3 OS=Homo sapiens GN=IMPAD1 PE=1 SV=1	12.2563	3	4	3	1	359	38.7	6.86
Q9BSH5	Haloacid dehalogenase-like hydrolase domain-containing protein 3 OS=Homo sapiens GN=HDHD3 PE=1 SV=1	15.9363	2	2	2	1	251	28	6.71
O75533	Splicing factor 3B subunit 1 OS=Homo sapiens GN=SF3B1 PE=1 SV=3	5.13804	3	3	3	1	1304	145.7	7.09
Q5JTV8	Isoform 3 of Torsin-1A-interacting protein 1 OS=Homo sapiens GN=TOR1AIP1	5.82192	3	3	2	1	584	66.3	8.18
Q9Y6M1	Insulin-like growth factor 2 mRNA-binding protein 2 OS=Homo sapiens GN=IGF2BP2 PE=1 SV=2	4.34057	2	2	1	1	599	66.1	8.46
P50402	Emerin OS=Homo sapiens GN=EMD PE=1 SV=1	19.2913	4	4	4	1	254	29	5.5
Q8NCN5	Pyruvate dehydrogenase phosphatase regulatory subunit, mitochondrial OS=Homo sapiens GN=PDPR PE=1 SV=2	4.55063	2	2	2	1	879	99.3	6.35
P43307	Translocon-associated protein subunit alpha OS=Homo sapiens GN=SSR1 PE=1 SV=3	9.09091	2	3	2	1	286	32.2	4.49
P06753	Isoform 2 of Tropomyosin alpha-3 chain OS=Homo sapiens GN=TPM3	9.67742	2	2	2	1	248	29	4.78
P32969	60S ribosomal protein L9 OS=Homo sapiens GN=RPL9 PE=1 SV=1	15.1042	2	3	2	1	192	21.9	9.95
P01033	Metalloproteinase inhibitor 1 OS=Homo sapiens GN=TIMP1 PE=1 SV=1	21.256	2	2	2	1	207	23.2	8.1
P23141	Isoform 2 of Liver carboxylesterase 1 OS=Homo sapiens GN=CES1	7.21831	2	3	2	1	568	62.6	6.6
Q16698	2,4-dienoyl-CoA reductase, mitochondrial OS=Homo sapiens GN=DECR1 PE=1 SV=1	10.4478	2	2	2	1	335	36	9.28
Q02338	D-beta-hydroxybutyrate dehydrogenase, mitochondrial OS=Homo sapiens GN=BDH1 PE=1 SV=3	16.6181	2	2	2	1	343	38.1	8.95
P25398	40S ribosomal protein S12 OS=Homo sapiens GN=RPS12 PE=1 SV=3	28.7879	3	3	3	1	132	14.5	7.21
Q6KB66	Isoform 3 of Keratin, type II cytoskeletal 80 OS=Homo sapiens GN=KRT80	7.18686	2	3	1	1	487	54.1	5.39
Q9C002	Normal mucosa of esophagus-specific gene 1 protein OS=Homo sapiens GN=NMES1 PE=2 SV=1	22.8916	1	1	1	1	83	9.6	9.47
Q9UBI6	Guanine nucleotide-binding protein G(I)/G(S)/G(O) subunit gamma-12 OS=Homo sapiens GN=GNG12 PE=1 SV=3	37.5	2	3	2	1	72	8	8.97
P20645	Cation-dependent mannose-6-phosphate receptor OS=Homo sapiens GN=M6PR PE=1 SV=1	12.6354	2	3	2	1	277	31	5.83
P62913	60S ribosomal protein L11 OS=Homo sapiens GN=RPL11 PE=1 SV=2	12.9213	2	3	2	1	178	20.2	9.6
Q9UM00	Calcium load-activated calcium channel OS=Homo sapiens GN=TMCO1 PE=1 SV=1	12.766	2	2	2	1	188	21.2	9.74
P04083	Annexin A1 OS=Homo sapiens GN=ANXA1 PE=1 SV=2	11.5607	2	2	2	1	346	38.7	7.02
P13688	Carcinoembryonic antigen-related cell adhesion molecule 1 OS=Homo sapiens GN=CEACAM1 PE=1 SV=2	5.70342	2	2	1	1	526	57.5	5.97
O00571	ATP-dependent RNA helicase DDX3X OS=Homo sapiens GN=DDX3X PE=1 SV=3	7.0997	3	3	3	1	662	73.2	7.18
Q14764	Major vault protein OS=Homo sapiens GN=MVP PE=1 SV=4	13.1019	4	4	4	1	893	99.3	5.48
Q8N4Q1	Isoform 2 of Mitochondrial intermembrane space import and assembly protein 40 OS=Homo sapiens GN=CHCHD4	27.0968	2	2	2	1	155	17.4	4.39
P05187	Alkaline phosphatase, placental type OS=Homo sapiens GN=ALPP PE=1 SV=2	8.97196	3	3	3	1	535	57.9	6.29
Q14978	Isoform Beta of Nucleolar and coiled-body phosphoprotein 1 OS=Homo sapiens GN=NOLC1	4.09027	2	3	2	1	709	74.7	9.47
P49821	NADH dehydrogenase [ubiquinone] flavoprotein 1, mitochondrial OS=Homo sapiens GN=NDUFV1 PE=1 SV=4	8.18966	2	2	2	1	464	50.8	8.21
Q9HAW8	UDP-glucuronosyltransferase 1-10 OS=Homo sapiens GN=UGT1A10 PE=1 SV=1	10.3774	2	3	2	1	530	59.8	7.3
Q9NQG5	Regulation of nuclear pre-mRNA domain-containing protein 1B OS=Homo sapiens GN=RPRD1B PE=1 SV=1	16.5644	2	2	2	1	326	36.9	5.97
Q14160	Isoform 3 of Protein scribble homolog OS=Homo sapiens GN=SCRIB	3.02115	2	2	2	1	1655	177.6	5.11
P49006	MARCKS-related protein OS=Homo sapiens GN=MARCKSL1 PE=1 SV=2	14.359	2	2	2	1	195	19.5	4.67
P14406	Cytochrome c oxidase subunit 7A2, mitochondrial OS=Homo sapiens GN=COX7A2 PE=1 SV=1	27.7108	2	3	2	1	83	9.4	9.76
Q92667	A-kinase anchor protein 1, mitochondrial OS=Homo sapiens GN=AKAP1 PE=1 SV=1	2.65781	1	1	1	1	903	97.3	4.94
P62249	40S ribosomal protein S16 OS=Homo sapiens GN=RPS16 PE=1 SV=2	25.3425	4	4	4	1	146	16.4	10.21
P98088	Mucin-5AC OS=Homo sapiens GN=MUC5AC PE=1 SV=4	3.25433	3	3	3	1	5654	585.2	7.02
P26373	60S ribosomal protein L13 OS=Homo sapiens GN=RPL13 PE=1 SV=4	17.5355	4	4	4	1	211	24.2	11.65
P60866	Isoform 2 of 40S ribosomal protein S20 OS=Homo sapiens GN=RPS20	11.9718	2	3	1	1	142	16	9.32
Q9BQG0	Isoform 2 of Myb-binding protein 1A OS=Homo sapiens GN=MYBBP1A	3.9039	2	2	2	1	1332	149.3	9.28
P84095	Rho-related GTP-binding protein RhoG OS=Homo sapiens GN=RHOG PE=1 SV=1	12.5654	2	3	1	1	191	21.3	8.12
P61619	Protein transport protein Sec61 subunit alpha isoform 1 OS=Homo sapiens GN=SEC61A1 PE=1 SV=2	6.72269	2	2	2	1	476	52.2	8.06
P06756	Integrin alpha-V OS=Homo sapiens GN=ITGAV PE=1 SV=2	3.72137	2	3	2	1	1048	116	5.68
P00973	Isoform p48 of 2'-5'-oligoadenylate synthase 1 OS=Homo sapiens GN=OAS1	9.17874	2	3	2	1	414	47.4	8.95
P15941	Isoform 2 of Mucin-1 OS=Homo sapiens GN=MUC1	3.56013	3	3	3	1	1264	122.9	7.56
P50897	Palmitoyl-protein thioesterase 1 OS=Homo sapiens GN=PPT1 PE=1 SV=1	13.7255	2	3	2	1	306	34.2	6.52
P33527	Isoform 9 of Multidrug resistance-associated protein 1 OS=Homo sapiens GN=ABCC1	2.92018	2	2	2	1	1541	172.5	6.81
O94973	Isoform 2 of AP-2 complex subunit alpha-2 OS=Homo sapiens GN=AP2A2	4.3617	2	3	1	1	940	104	6.86
P62829	60S ribosomal protein L23 OS=Homo sapiens GN=RPL23 PE=1 SV=1	14.2857	1	1	1	1	140	14.9	10.51
Q08170	Serine/arginine-rich splicing factor 4 OS=Homo sapiens GN=SRSF4 PE=1 SV=2	6.07287	3	4	1	1	494	56.6	11.52
Q14165	Malectin OS=Homo sapiens GN=MLEC PE=1 SV=1	12.3288	2	2	2	1	292	32.2	5.41
O00410	Isoform 3 of Importin-5 OS=Homo sapiens GN=IPO5	2.33184	1	1	1	1	1115	125.5	4.92
P31151	Protein S100-A7 OS=Homo sapiens GN=S100A7 PE=1 SV=4	19.802	1	1	1	1	101	11.5	6.77
P16402	Histone H1.3 OS=Homo sapiens GN=HIST1H1D PE=1 SV=2	10.4072	3	3	3	1	221	22.3	11.02
Q10713	Mitochondrial-processing peptidase subunit alpha OS=Homo sapiens GN=PMPCA PE=1 SV=2	6.66667	2	2	2	1	525	58.2	6.92
O43684	Mitotic checkpoint protein BUB3 OS=Homo sapiens GN=BUB3 PE=1 SV=1	20.7317	3	3	3	1	328	37.1	6.84
O94905	Erlin-2 OS=Homo sapiens GN=ERLIN2 PE=1 SV=1	12.3894	2	2	1	1	339	37.8	5.62
Q9BXK5	Bcl-2-like protein 13 OS=Homo sapiens GN=BCL2L13 PE=1 SV=1	10.7216	2	2	2	1	485	52.7	4.44
P62899	60S ribosomal protein L31 OS=Homo sapiens GN=RPL31 PE=1 SV=1	24.8	3	3	3	1	125	14.5	10.54
Q00577	Transcriptional activator protein Pur-alpha OS=Homo sapiens GN=PURA PE=1 SV=2	12.1118	2	2	2	1	322	34.9	6.44
P51858	Isoform 3 of Hepatoma-derived growth factor OS=Homo sapiens GN=HDGF	14.8438	2	2	2	1	256	28.2	4.79
P62857	40S ribosomal protein S28 OS=Homo sapiens GN=RPS28 PE=1 SV=1	33.3333	2	2	2	1	69	7.8	10.7
Q14974	Importin subunit beta-1 OS=Homo sapiens GN=KPNB1 PE=1 SV=2	3.08219	2	2	2	1	876	97.1	4.78
P61254	60S ribosomal protein L26 OS=Homo sapiens GN=RPL26 PE=1 SV=1	17.2414	3	3	3	1	145	17.2	10.55
P61009	Signal peptidase complex subunit 3 OS=Homo sapiens GN=SPCS3 PE=1 SV=1	17.7778	3	3	3	1	180	20.3	8.62
Q92947	Glutaryl-CoA dehydrogenase, mitochondrial OS=Homo sapiens GN=GCDH PE=1 SV=1	5.93607	1	2	1	1	438	48.1	8.06
Q9C005	Protein dpy-30 homolog OS=Homo sapiens GN=DPY30 PE=1 SV=1	16.1616	1	2	1	1	99	11.2	4.88
P09110	3-ketoacyl-CoA thiolase, peroxisomal OS=Homo sapiens GN=ACAA1 PE=1 SV=2	8.72642	2	2	2	1	424	44.3	8.44
P56134	ATP synthase subunit f, mitochondrial OS=Homo sapiens GN=ATP5J2 PE=1 SV=3	25.5319	2	2	2	1	94	10.9	9.67
Q9NZ01	Very-long-chain enoyl-CoA reductase OS=Homo sapiens GN=TECR PE=1 SV=1	9.09091	3	4	3	1	308	36	9.45
P62263	40S ribosomal protein S14 OS=Homo sapiens GN=RPS14 PE=1 SV=3	15.894	2	2	2	1	151	16.3	10.05
Q9C0E8	Isoform 4 of Protein lunapark OS=Homo sapiens GN=LNP	7.84314	2	3	2	1	459	50.8	5.08
O14672	Disintegrin and metalloproteinase domain-containing protein 10 OS=Homo sapiens GN=ADAM10 PE=1 SV=1	3.87701	2	2	2	1	748	84.1	7.77
P39019	40S ribosomal protein S19 OS=Homo sapiens GN=RPS19 PE=1 SV=2	17.2414	2	2	2	1	145	16.1	10.32
P31946	14-3-3 protein beta/alpha OS=Homo sapiens GN=YWHAB PE=1 SV=3	8.13008	1	1	1	1	246	28.1	4.83
Q13217	DnaJ homolog subfamily C member 3 OS=Homo sapiens GN=DNAJC3 PE=1 SV=1	5.95238	1	1	1	1	504	57.5	6.15
Q8N5N7	39S ribosomal protein L50, mitochondrial OS=Homo sapiens GN=MRPL50 PE=1 SV=2	12.0253	1	1	1	1	158	18.3	7.88
P38159	RNA-binding motif protein, X chromosome OS=Homo sapiens GN=RBMX PE=1 SV=3	8.95141	3	4	3	1	391	42.3	10.05
Q9NNW7	Thioredoxin reductase 2, mitochondrial OS=Homo sapiens GN=TXNRD2 PE=1 SV=3	10.4962	3	3	3	1	524	56.5	7.5
Q16787	Laminin subunit alpha-3 OS=Homo sapiens GN=LAMA3 PE=1 SV=2	0.660066	1	1	1	1	3333	366.4	7.24
Q9HBI6	Phylloquinone omega-hydroxylase CYP4F11 OS=Homo sapiens GN=CYP4F11 PE=1 SV=3	7.82443	2	2	1	1	524	60.1	6.73
Q969X5	Endoplasmic reticulum-Golgi intermediate compartment protein 1 OS=Homo sapiens GN=ERGIC1 PE=1 SV=1	8.27586	1	1	1	1	290	32.6	7.06
Q13492	Phosphatidylinositol-binding clathrin assembly protein OS=Homo sapiens GN=PICALM PE=1 SV=2	5.52147	2	2	2	1	652	70.7	7.9
P12074	Cytochrome c oxidase subunit 6A1, mitochondrial OS=Homo sapiens GN=COX6A1 PE=1 SV=4	26.6055	1	3	1	1	109	12.1	9.32
O95299	Isoform 2 of NADH dehydrogenase [ubiquinone] 1 alpha subcomplex subunit 10, mitochondrial OS=Homo sapiens GN=NDUFA10	5.12821	1	1	1	1	429	48.5	7.21
Q12849	G-rich sequence factor 1 OS=Homo sapiens GN=GRSF1 PE=1 SV=3	11.0417	2	2	2	1	480	53.1	6.19
P46776	60S ribosomal protein L27a OS=Homo sapiens GN=RPL27A PE=1 SV=2	14.1892	2	3	2	1	148	16.6	11
Q13428	Isoform 4 of Treacle protein OS=Homo sapiens GN=TCOF1	2.29659	2	2	2	1	1524	155.8	8.95
Q9NZ08	Isoform 2 of Endoplasmic reticulum aminopeptidase 1 OS=Homo sapiens GN=ERAP1	2.32068	2	2	2	1	948	107.8	6.28
O95758	Isoform 4 of Polypyrimidine tract-binding protein 3 OS=Homo sapiens GN=PTBP3	9.319	5	5	1	1	558	60.4	9.19
P11387	DNA topoisomerase 1 OS=Homo sapiens GN=TOP1 PE=1 SV=2	4.70588	2	2	2	1	765	90.7	9.31
P62847	Isoform 4 of 40S ribosomal protein S24 OS=Homo sapiens GN=RPS24	9.34256	2	3	2	1	289	32.4	10.15
O75306	NADH dehydrogenase [ubiquinone] iron-sulfur protein 2, mitochondrial OS=Homo sapiens GN=NDUFS2 PE=1 SV=2	8.20734	3	3	3	1	463	52.5	7.55
O14561	Acyl carrier protein, mitochondrial OS=Homo sapiens GN=NDUFAB1 PE=1 SV=3	9.61538	1	1	1	1	156	17.4	4.93
P14927	Cytochrome b-c1 complex subunit 7 OS=Homo sapiens GN=UQCRB PE=1 SV=2	23.4234	3	4	3	1	111	13.5	8.78
Q96G23	Ceramide synthase 2 OS=Homo sapiens GN=CERS2 PE=1 SV=1	9.47368	2	2	2	1	380	44.8	8.98
P07477	Trypsin-1 OS=Homo sapiens GN=PRSS1 PE=1 SV=1	8.09717	1	1	1	1	247	26.5	6.51
Q9BZE1	39S ribosomal protein L37, mitochondrial OS=Homo sapiens GN=MRPL37 PE=1 SV=2	10.4019	2	2	2	1	423	48.1	8.59
Q9Y3D6	Mitochondrial fission 1 protein OS=Homo sapiens GN=FIS1 PE=1 SV=2	10.5263	1	2	1	1	152	16.9	8.79
Q13510	Isoform 2 of Acid ceramidase OS=Homo sapiens GN=ASAH1	9.73236	2	3	2	1	411	46.5	7.85
P51553	Isocitrate dehydrogenase [NAD] subunit gamma, mitochondrial OS=Homo sapiens GN=IDH3G PE=1 SV=1	8.14249	2	2	2	1	393	42.8	8.5
Q06481	Amyloid-like protein 2 OS=Homo sapiens GN=APLP2 PE=1 SV=2	2.62123	1	1	1	1	763	86.9	4.79
O15260	Surfeit locus protein 4 OS=Homo sapiens GN=SURF4 PE=1 SV=3	7.80669	2	2	2	1	269	30.4	7.78
P09497	Clathrin light chain B OS=Homo sapiens GN=CLTB PE=1 SV=1	8.73362	3	4	3	1	229	25.2	4.64
Q13724	Mannosyl-oligosaccharide glucosidase OS=Homo sapiens GN=MOGS PE=1 SV=5	5.25687	2	2	2	1	837	91.9	8.9
P49207	60S ribosomal protein L34 OS=Homo sapiens GN=RPL34 PE=1 SV=3	29.9145	4	4	4	1	117	13.3	11.47
Q9H8Y8	Isoform 3 of Golgi reassembly-stacking protein 2 OS=Homo sapiens GN=GORASP2	10.1293	3	4	3	1	464	48.6	4.84
P22570	Isoform 3 of NADPH:adrenodoxin oxidoreductase, mitochondrial OS=Homo sapiens GN=FDXR	8.42697	2	2	2	1	534	58.3	7.87
Q99538	Legumain OS=Homo sapiens GN=LGMN PE=1 SV=1	3.9261	1	1	1	1	433	49.4	6.55
O75976	Carboxypeptidase D OS=Homo sapiens GN=CPD PE=1 SV=2	1.95652	2	3	2	1	1380	152.8	6.05
P98179	RNA-binding protein 3 OS=Homo sapiens GN=RBM3 PE=1 SV=1	31.8471	2	2	2	1	157	17.2	8.91
P61006	Ras-related protein Rab-8A OS=Homo sapiens GN=RAB8A PE=1 SV=1	14.4928	3	4	1	1	207	23.7	9.07
Q99720	Sigma non-opioid intracellular receptor 1 OS=Homo sapiens GN=SIGMAR1 PE=1 SV=1	14.7982	1	1	1	1	223	25.1	5.96
P50440	Glycine amidinotransferase, mitochondrial OS=Homo sapiens GN=GATM PE=1 SV=1	10.4019	2	2	2	1	423	48.4	8.05
P04632	Calpain small subunit 1 OS=Homo sapiens GN=CAPNS1 PE=1 SV=1	8.95522	1	1	1	1	268	28.3	5.2
O00592	Podocalyxin OS=Homo sapiens GN=PODXL PE=1 SV=2	4.6595	3	3	3	1	558	58.6	5.49
Q03135	Caveolin-1 OS=Homo sapiens GN=CAV1 PE=1 SV=4	16.2921	2	2	2	1	178	20.5	6.02
Q9BRJ2	39S ribosomal protein L45, mitochondrial OS=Homo sapiens GN=MRPL45 PE=1 SV=2	15.6863	2	2	2	1	306	35.3	9.03
O75477	Erlin-1 OS=Homo sapiens GN=ERLIN1 PE=1 SV=1	12.1387	2	2	1	1	346	38.9	7.87
Q92552	Isoform 2 of 28S ribosomal protein S27, mitochondrial OS=Homo sapiens GN=MRPS27	6.7757	1	1	1	1	428	49.1	6.33
Q9Y4W6	AFG3-like protein 2 OS=Homo sapiens GN=AFG3L2 PE=1 SV=2	3.13676	3	4	3	1	797	88.5	8.66
Q9Y5M8	Signal recognition particle receptor subunit beta OS=Homo sapiens GN=SRPRB PE=1 SV=3	7.01107	1	2	1	1	271	29.7	9.04
Q00765	Receptor expression-enhancing protein 5 OS=Homo sapiens GN=REEP5 PE=1 SV=3	11.6402	4	4	4	1	189	21.5	8.1
Q96DZ1	Endoplasmic reticulum lectin 1 OS=Homo sapiens GN=ERLEC1 PE=1 SV=1	9.31677	3	3	3	1	483	54.8	6.28
Q9UPN3	Microtubule-actin cross-linking factor 1, isoforms 1/2/3/5 OS=Homo sapiens GN=MACF1 PE=1 SV=4	0.473741	2	2	1	1	7388	837.8	5.39
Q9NX14	Isoform 2 of NADH dehydrogenase [ubiquinone] 1 beta subcomplex subunit 11, mitochondrial OS=Homo sapiens GN=NDUFB11	14.1104	1	1	1	1	163	18.4	5.24
Q9Y2W1	Thyroid hormone receptor-associated protein 3 OS=Homo sapiens GN=THRAP3 PE=1 SV=2	2.09424	1	1	1	1	955	108.6	10.15
P57105	Synaptojanin-2-binding protein OS=Homo sapiens GN=SYNJ2BP PE=1 SV=2	14.4828	2	2	2	1	145	15.9	6.3
Q15643	Thyroid receptor-interacting protein 11 OS=Homo sapiens GN=TRIP11 PE=1 SV=3	3.43608	2	3	2	1	1979	227.4	5.26
P07305	Histone H1.0 OS=Homo sapiens GN=H1F0 PE=1 SV=3	11.8557	2	2	2	1	194	20.9	10.84
O95210	Starch-binding domain-containing protein 1 OS=Homo sapiens GN=STBD1 PE=1 SV=1	6.42458	1	1	1	1	358	39	5.73
Q01844	Isoform 5 of RNA-binding protein EWS OS=Homo sapiens GN=EWSR1	4.38729	3	3	3	1	661	68.9	9.29
Q96EY7	Pentatricopeptide repeat domain-containing protein 3, mitochondrial OS=Homo sapiens GN=PTCD3 PE=1 SV=3	4.209	1	1	1	1	689	78.5	6.42
P61513	60S ribosomal protein L37a OS=Homo sapiens GN=RPL37A PE=1 SV=2	17.3913	2	3	2	1	92	10.3	10.43
Q86TS9	39S ribosomal protein L52, mitochondrial OS=Homo sapiens GN=MRPL52 PE=1 SV=2	26.8293	1	1	1	1	123	13.7	10.26
Q9H6K4	Optic atrophy 3 protein OS=Homo sapiens GN=OPA3 PE=1 SV=1	26.257	3	3	3	1	179	20	8.91
P61421	V-type proton ATPase subunit d 1 OS=Homo sapiens GN=ATP6V0D1 PE=1 SV=1	7.69231	1	1	1	1	351	40.3	5
Q99442	Translocation protein SEC62 OS=Homo sapiens GN=SEC62 PE=1 SV=1	7.5188	3	3	3	1	399	45.8	7.12
Q92542	Nicastrin OS=Homo sapiens GN=NCSTN PE=1 SV=2	6.06488	1	1	1	1	709	78.4	5.99
O76024	Wolframin OS=Homo sapiens GN=WFS1 PE=1 SV=2	4.60674	2	2	2	1	890	100.2	8.05
O00330	Pyruvate dehydrogenase protein X component, mitochondrial OS=Homo sapiens GN=PDHX PE=1 SV=3	3.19361	1	2	1	1	501	54.1	8.66
P82650	28S ribosomal protein S22, mitochondrial OS=Homo sapiens GN=MRPS22 PE=1 SV=1	7.5	1	1	1	1	360	41.3	7.9
Q6RW13	Type-1 angiotensin II receptor-associated protein OS=Homo sapiens GN=AGTRAP PE=1 SV=1	13.8365	1	1	1	1	159	17.4	6.14
Q01130	Serine/arginine-rich splicing factor 2 OS=Homo sapiens GN=SRSF2 PE=1 SV=4	8.59729	2	3	2	1	221	25.5	11.85
O14548	Cytochrome c oxidase subunit 7A-related protein, mitochondrial OS=Homo sapiens GN=COX7A2L PE=1 SV=2	28.9474	1	2	1	1	114	12.6	9.42
O75323	Protein NipSnap homolog 2 OS=Homo sapiens GN=GBAS PE=1 SV=1	10.1399	2	2	2	1	286	33.7	9.36
P11586	C-1-tetrahydrofolate synthase, cytoplasmic OS=Homo sapiens GN=MTHFD1 PE=1 SV=3	2.56684	1	2	1	1	935	101.5	7.3
O15438	Isoform 4 of Canalicular multispecific organic anion transporter 2 OS=Homo sapiens GN=ABCC3	1.52091	1	1	1	1	1578	174.8	7.64
Q8NBJ5	Procollagen galactosyltransferase 1 OS=Homo sapiens GN=COLGALT1 PE=1 SV=1	4.34084	3	3	3	1	622	71.6	7.31
Q8NBQ5	Estradiol 17-beta-dehydrogenase 11 OS=Homo sapiens GN=HSD17B11 PE=1 SV=3	9	2	2	2	1	300	32.9	9.07
Q14318	Isoform 2 of Peptidyl-prolyl cis-trans isomerase FKBP8 OS=Homo sapiens GN=FKBP8	8.95884	2	2	2	1	413	44.6	4.84
O00560	Syntenin-1 OS=Homo sapiens GN=SDCBP PE=1 SV=1	7.71812	1	1	1	1	298	32.4	7.53
Q6UXD5	Seizure 6-like protein 2 OS=Homo sapiens GN=SEZ6L2 PE=1 SV=2	3.40659	1	1	1	1	910	97.5	4.89
P53999	Activated RNA polymerase II transcriptional coactivator p15 OS=Homo sapiens GN=SUB1 PE=1 SV=3	18.8976	2	2	2	1	127	14.4	9.6
P15927	Isoform 3 of Replication protein A 32 kDa subunit OS=Homo sapiens GN=RPA2	6.42458	1	1	1	1	358	38.8	8.94
Q969N2	GPI transamidase component PIG-T OS=Homo sapiens GN=PIGT PE=1 SV=1	2.59516	1	1	1	1	578	65.7	8.38
Q5T653	39S ribosomal protein L2, mitochondrial OS=Homo sapiens GN=MRPL2 PE=1 SV=2	8.19672	1	1	1	1	305	33.3	11.3
Q96S52	GPI transamidase component PIG-S OS=Homo sapiens GN=PIGS PE=1 SV=3	3.78378	1	1	1	1	555	61.6	6.49
P62269	40S ribosomal protein S18 OS=Homo sapiens GN=RPS18 PE=1 SV=3	18.4211	3	3	3	1	152	17.7	10.99
O60888	Isoform A of Protein CutA OS=Homo sapiens GN=CUTA	13.6364	1	1	1	1	198	20.9	5.48
Q14139	Isoform 2 of Ubiquitin conjugation factor E4 A OS=Homo sapiens GN=UBE4A	2.32992	1	1	1	1	1073	123.4	5.24
P23588	Eukaryotic translation initiation factor 4B OS=Homo sapiens GN=EIF4B PE=1 SV=2	8.6743	2	3	2	1	611	69.1	5.73
Q7Z2T5	TRMT1-like protein OS=Homo sapiens GN=TRMT1L PE=1 SV=2	3.00136	1	1	1	1	733	81.7	7.88
Q01081	Splicing factor U2AF 35 kDa subunit OS=Homo sapiens GN=U2AF1 PE=1 SV=3	7.5	1	1	1	1	240	27.9	8.81
Q9NX58	Cell growth-regulating nucleolar protein OS=Homo sapiens GN=LYAR PE=1 SV=2	6.59631	1	2	1	1	379	43.6	9.54
Q969G5	Protein kinase C delta-binding protein OS=Homo sapiens GN=PRKCDBP PE=1 SV=3	11.4943	3	3	3	1	261	27.7	6.43
Q14151	Scaffold attachment factor B2 OS=Homo sapiens GN=SAFB2 PE=1 SV=1	2.72823	1	1	1	1	953	107.4	6.16
P53365	Arfaptin-2 OS=Homo sapiens GN=ARFIP2 PE=1 SV=1	4.98534	1	1	1	1	341	37.8	6.04
Q8IWJ2	GRIP and coiled-coil domain-containing protein 2 OS=Homo sapiens GN=GCC2 PE=1 SV=4	3.3848	2	2	2	1	1684	195.8	5.14
Q9BQ52	Zinc phosphodiesterase ELAC protein 2 OS=Homo sapiens GN=ELAC2 PE=1 SV=2	2.42131	1	1	1	1	826	92.2	7.9
P11310	Isoform 2 of Medium-chain specific acyl-CoA dehydrogenase, mitochondrial OS=Homo sapiens GN=ACADM	5.88235	2	2	2	1	425	47	8.31
Q9BT22	Chitobiosyldiphosphodolichol beta-mannosyltransferase OS=Homo sapiens GN=ALG1 PE=1 SV=2	4.52586	1	1	1	1	464	52.5	7.23
Q9GZM5	Protein YIPF3 OS=Homo sapiens GN=YIPF3 PE=1 SV=1	6.57143	1	1	1	1	350	38.2	5.76
O96000	NADH dehydrogenase [ubiquinone] 1 beta subcomplex subunit 10 OS=Homo sapiens GN=NDUFB10 PE=1 SV=3	14.5349	2	2	2	1	172	20.8	8.48
Q13505	Metaxin-1 OS=Homo sapiens GN=MTX1 PE=1 SV=2	7.72532	2	2	2	1	466	51.4	9.79
P40429	60S ribosomal protein L13a OS=Homo sapiens GN=RPL13A PE=1 SV=2	12.3153	3	3	3	1	203	23.6	10.93
O14684	Prostaglandin E synthase OS=Homo sapiens GN=PTGES PE=1 SV=2	21.0526	2	3	2	1	152	17.1	9.5
P12931	Isoform 2 of Proto-oncogene tyrosine-protein kinase Src OS=Homo sapiens GN=SRC	7.93358	2	2	2	1	542	60.6	7.84
Q9Y678	Coatomer subunit gamma-1 OS=Homo sapiens GN=COPG1 PE=1 SV=1	2.97483	1	1	1	1	874	97.7	5.47
P62851	40S ribosomal protein S25 OS=Homo sapiens GN=RPS25 PE=1 SV=1	20.8	3	3	3	1	125	13.7	10.11
Q9NUB1	Acetyl-coenzyme A synthetase 2-like, mitochondrial OS=Homo sapiens GN=ACSS1 PE=1 SV=2	4.35414	1	1	1	1	689	74.8	7.11
Q8IXM3	39S ribosomal protein L41, mitochondrial OS=Homo sapiens GN=MRPL41 PE=1 SV=1	24.0876	1	2	1	1	137	15.4	9.57
Q9BV40	Vesicle-associated membrane protein 8 OS=Homo sapiens GN=VAMP8 PE=1 SV=1	32	3	3	3	1	100	11.4	7.34
P04792	Heat shock protein beta-1 OS=Homo sapiens GN=HSPB1 PE=1 SV=2	12.6829	2	2	2	1	205	22.8	6.4
Q13813	Isoform 2 of Spectrin alpha chain, non-erythrocytic 1 OS=Homo sapiens GN=SPTAN1	0.767057	1	1	1	1	2477	284.9	5.35
P49756	RNA-binding protein 25 OS=Homo sapiens GN=RBM25 PE=1 SV=3	2.9656	1	2	1	1	843	100.1	6.32
Q13641	Trophoblast glycoprotein OS=Homo sapiens GN=TPBG PE=1 SV=1	4.52381	1	2	1	1	420	46	6.83
Q9NVV4	Isoform 2 of Poly(A) RNA polymerase, mitochondrial OS=Homo sapiens GN=MTPAP	3.37079	1	1	1	1	712	78.8	8.28
P18433	Receptor-type tyrosine-protein phosphatase alpha OS=Homo sapiens GN=PTPRA PE=1 SV=2	3.74065	2	2	1	1	802	90.5	6.7
P57088	Transmembrane protein 33 OS=Homo sapiens GN=TMEM33 PE=1 SV=2	4.8583	1	1	1	1	247	28	9.7
P47897	Glutamine--tRNA ligase OS=Homo sapiens GN=QARS PE=1 SV=1	8.25806	2	2	2	1	775	87.7	7.15
O14653	Isoform B of Golgi SNAP receptor complex member 2 OS=Homo sapiens GN=GOSR2	9.38967	1	1	1	1	213	24.6	8.47
Q6IAA8	Ragulator complex protein LAMTOR1 OS=Homo sapiens GN=LAMTOR1 PE=1 SV=2	8.07453	1	1	1	1	161	17.7	5.15
Q02809	Isoform 2 of Procollagen-lysine,2-oxoglutarate 5-dioxygenase 1 OS=Homo sapiens GN=PLOD1	3.87597	2	2	2	1	774	88.2	7.11
Q6P587	Isoform 3 of Acylpyruvase FAHD1, mitochondrial OS=Homo sapiens GN=FAHD1	12.5	1	1	1	1	248	27.1	7.69
P47914	60S ribosomal protein L29 OS=Homo sapiens GN=RPL29 PE=1 SV=2	9.43396	1	1	1	1	159	17.7	11.66
Q5RI15	Isoform 2 of Cytochrome c oxidase protein 20 homolog OS=Homo sapiens GN=COX20	10.7692	1	2	1	1	130	14.7	8.81
Q14498	RNA-binding protein 39 OS=Homo sapiens GN=RBM39 PE=1 SV=2	7.73585	2	2	2	1	530	59.3	10.1
P20930	Filaggrin OS=Homo sapiens GN=FLG PE=1 SV=3	0.886481	1	1	1	1	4061	434.9	9.25
Q14247	Isoform 2 of Src substrate cortactin OS=Homo sapiens GN=CTTN	3.78549	2	2	2	1	634	70.9	6.64
O00165	Isoform 2 of HCLS1-associated protein X-1 OS=Homo sapiens GN=HAX1	8.36237	1	1	1	1	287	32.4	4.96
P26640	Valine--tRNA ligase OS=Homo sapiens GN=VARS PE=1 SV=4	2.8481	1	1	1	1	1264	140.4	7.59
P36268	Isoform 3 of Inactive gamma-glutamyltranspeptidase 2 OS=Homo sapiens GN=GGT2	3.48432	2	2	2	1	574	62.1	7.33
O15231	Isoform 6 of Zinc finger protein 185 OS=Homo sapiens GN=ZNF185	4.29958	1	1	1	1	721	76.8	7.05
Q8IYB3	Serine/arginine repetitive matrix protein 1 OS=Homo sapiens GN=SRRM1 PE=1 SV=2	2.65487	2	2	2	1	904	102.3	11.84
Q01082	Spectrin beta chain, non-erythrocytic 1 OS=Homo sapiens GN=SPTBN1 PE=1 SV=2	1.18443	2	2	2	1	2364	274.4	5.57
Q03519	Antigen peptide transporter 2 OS=Homo sapiens GN=TAP2 PE=1 SV=1	3.64431	1	1	1	1	686	75.6	8.02
Q7L1Q6	Isoform 3 of Basic leucine zipper and W2 domain-containing protein 1 OS=Homo sapiens GN=BZW1	5.76497	1	1	1	1	451	51.2	6.62
Q7Z2K6	Endoplasmic reticulum metallopeptidase 1 OS=Homo sapiens GN=ERMP1 PE=1 SV=2	2.65487	1	1	1	1	904	100.2	7.52
Q9Y2B0	Protein canopy homolog 2 OS=Homo sapiens GN=CNPY2 PE=1 SV=1	10.989	2	2	2	1	182	20.6	4.92
P20340	Ras-related protein Rab-6A OS=Homo sapiens GN=RAB6A PE=1 SV=3	12.5	3	4	2	1	208	23.6	5.54
Q99417	C-Myc-binding protein OS=Homo sapiens GN=MYCBP PE=1 SV=3	16.5049	1	1	1	1	103	12	5.91
Q9NVS9	Pyridoxine-5'-phosphate oxidase OS=Homo sapiens GN=PNPO PE=1 SV=1	7.27969	1	2	1	1	261	30	7.06
Q9Y3I0	tRNA-splicing ligase RtcB homolog OS=Homo sapiens GN=RTCB PE=1 SV=1	7.72277	2	2	2	1	505	55.2	7.23
Q9H7Z7	Prostaglandin E synthase 2 OS=Homo sapiens GN=PTGES2 PE=1 SV=1	5.03979	1	1	1	1	377	41.9	9.16
Q5T4F4	Isoform 3 of Protrudin OS=Homo sapiens GN=ZFYVE27	3.36538	1	2	1	1	416	46.3	5.15
P50336	Protoporphyrinogen oxidase OS=Homo sapiens GN=PPOX PE=1 SV=1	6.49895	1	2	1	1	477	50.7	8.16
P18621	Isoform 3 of 60S ribosomal protein L17 OS=Homo sapiens GN=RPL17	9.64912	2	2	2	1	228	26.4	10.1
Q9NR30	Nucleolar RNA helicase 2 OS=Homo sapiens GN=DDX21 PE=1 SV=5	2.80971	2	2	2	1	783	87.3	9.28
Q9BRR6	ADP-dependent glucokinase OS=Homo sapiens GN=ADPGK PE=1 SV=1	7.04225	1	1	1	1	497	54.1	6.2
P60660	Myosin light polypeptide 6 OS=Homo sapiens GN=MYL6 PE=1 SV=2	10.596	1	1	1	1	151	16.9	4.65
P01130	Low-density lipoprotein receptor OS=Homo sapiens GN=LDLR PE=1 SV=1	1.86047	1	1	1	1	860	95.3	5.05
Q9P2R7	Succinate--CoA ligase [ADP-forming] subunit beta, mitochondrial OS=Homo sapiens GN=SUCLA2 PE=1 SV=3	5.39957	3	3	3	1	463	50.3	7.42
Q9H2W6	39S ribosomal protein L46, mitochondrial OS=Homo sapiens GN=MRPL46 PE=1 SV=1	8.24373	1	1	1	1	279	31.7	7.05
P42766	60S ribosomal protein L35 OS=Homo sapiens GN=RPL35 PE=1 SV=2	15.4472	2	2	2	1	123	14.5	11.05
Q96M27	Isoform 2 of Protein PRRC1 OS=Homo sapiens GN=PRRC1	3.66379	1	1	1	1	464	48.5	5.39
Q9UNN8	Endothelial protein C receptor OS=Homo sapiens GN=PROCR PE=1 SV=1	7.14286	1	1	1	1	238	26.7	7.18
Q92575	UBX domain-containing protein 4 OS=Homo sapiens GN=UBXN4 PE=1 SV=2	6.69291	1	1	1	1	508	56.7	6.38
P08962	CD63 antigen OS=Homo sapiens GN=CD63 PE=1 SV=2	10.084	3	3	3	1	238	25.6	7.81
P83881	60S ribosomal protein L36a OS=Homo sapiens GN=RPL36A PE=1 SV=2	16.0377	2	2	2	1	106	12.4	10.58
Q01650	Large neutral amino acids transporter small subunit 1 OS=Homo sapiens GN=SLC7A5 PE=1 SV=2	5.71992	1	1	1	1	507	55	7.72
O15031	Plexin-B2 OS=Homo sapiens GN=PLXNB2 PE=1 SV=3	2.88357	2	2	2	1	1838	205	6.24
Q96HR9	Receptor expression-enhancing protein 6 OS=Homo sapiens GN=REEP6 PE=1 SV=1	7.06522	1	1	1	1	184	20.7	8.56
Q9BSE5	Agmatinase, mitochondrial OS=Homo sapiens GN=AGMAT PE=1 SV=2	8.52273	1	1	1	1	352	37.6	7.59
Q9BYN0	Sulfiredoxin-1 OS=Homo sapiens GN=SRXN1 PE=1 SV=2	17.5182	1	1	1	1	137	14.3	8.19
Q6P1X6	UPF0598 protein C8orf82 OS=Homo sapiens GN=C8orf82 PE=1 SV=2	8.33333	1	1	1	1	216	23.9	9.14
Q96QR8	Transcriptional activator protein Pur-beta OS=Homo sapiens GN=PURB PE=1 SV=3	10.2564	1	1	1	1	312	33.2	5.43
P07814	Bifunctional glutamate/proline--tRNA ligase OS=Homo sapiens GN=EPRS PE=1 SV=5	1.65344	1	1	1	1	1512	170.5	7.33
Q9Y5U8	Mitochondrial pyruvate carrier 1 OS=Homo sapiens GN=MPC1 PE=1 SV=1	19.2661	1	1	1	1	109	12.3	9.61
P28799	Granulins OS=Homo sapiens GN=GRN PE=1 SV=2	3.87858	2	2	2	1	593	63.5	6.83
O75694	Nuclear pore complex protein Nup155 OS=Homo sapiens GN=NUP155 PE=1 SV=1	1.79727	1	2	1	1	1391	155.1	6.16
Q92805	Golgin subfamily A member 1 OS=Homo sapiens GN=GOLGA1 PE=1 SV=3	4.82399	1	1	1	1	767	88.1	5.27
Q86VU5	Catechol O-methyltransferase domain-containing protein 1 OS=Homo sapiens GN=COMTD1 PE=1 SV=1	9.92366	1	1	1	1	262	28.8	8.38
Q9UKM9	RNA-binding protein Raly OS=Homo sapiens GN=RALY PE=1 SV=1	6.20915	2	2	2	1	306	32.4	9.17
Q13751	Laminin subunit beta-3 OS=Homo sapiens GN=LAMB3 PE=1 SV=1	1.27986	1	1	1	1	1172	129.5	7.21
P02765	Alpha-2-HS-glycoprotein OS=Homo sapiens GN=AHSG PE=1 SV=1	5.44959	2	2	2	1	367	39.3	5.72
O43504	Ragulator complex protein LAMTOR5 OS=Homo sapiens GN=LAMTOR5 PE=1 SV=1	21.978	1	1	1	1	91	9.6	4.87
P21953	2-oxoisovalerate dehydrogenase subunit beta, mitochondrial OS=Homo sapiens GN=BCKDHB PE=1 SV=2	13.7755	2	2	2	1	392	43.1	6.29
O76094	Signal recognition particle subunit SRP72 OS=Homo sapiens GN=SRP72 PE=1 SV=3	3.12966	1	1	1	1	671	74.6	9.26
Q7L8L6	FAST kinase domain-containing protein 5, mitochondrial OS=Homo sapiens GN=FASTKD5 PE=1 SV=1	1.83246	1	2	1	1	764	86.5	8.13
Q15067	Peroxisomal acyl-coenzyme A oxidase 1 OS=Homo sapiens GN=ACOX1 PE=1 SV=3	3.33333	1	1	1	1	660	74.4	8.16
Q07960	Rho GTPase-activating protein 1 OS=Homo sapiens GN=ARHGAP1 PE=1 SV=1	5.92255	1	2	1	1	439	50.4	6.29
P82673	28S ribosomal protein S35, mitochondrial OS=Homo sapiens GN=MRPS35 PE=1 SV=1	8.35913	1	2	1	1	323	36.8	8.24
Q15041	ADP-ribosylation factor-like protein 6-interacting protein 1 OS=Homo sapiens GN=ARL6IP1 PE=1 SV=2	9.85222	3	3	2	1	203	23.3	9.32
P45954	Short/branched chain specific acyl-CoA dehydrogenase, mitochondrial OS=Homo sapiens GN=ACADSB PE=1 SV=1	5.09259	1	1	1	1	432	47.5	6.99
Q9UIQ6	Leucyl-cystinyl aminopeptidase OS=Homo sapiens GN=LNPEP PE=1 SV=3	1.46341	1	1	1	1	1025	117.3	5.73
P09669	Cytochrome c oxidase subunit 6C OS=Homo sapiens GN=COX6C PE=1 SV=2	20	2	2	2	1	75	8.8	10.39
Q5T0D9	Tumor protein p63-regulated gene 1-like protein OS=Homo sapiens GN=TPRG1L PE=1 SV=1	6.61765	1	1	1	1	272	30.2	7.34
P62906	60S ribosomal protein L10a OS=Homo sapiens GN=RPL10A PE=1 SV=2	10.1382	3	3	3	1	217	24.8	9.94
P62750	60S ribosomal protein L23a OS=Homo sapiens GN=RPL23A PE=1 SV=1	14.1026	2	2	2	1	156	17.7	10.45
O43747	Isoform 2 of AP-1 complex subunit gamma-1 OS=Homo sapiens GN=AP1G1	3.27273	1	2	1	1	825	91.7	6.8
O14656	Torsin-1A OS=Homo sapiens GN=TOR1A PE=1 SV=1	4.51807	1	2	1	1	332	37.8	6.99
Q9BUJ2	Heterogeneous nuclear ribonucleoprotein U-like protein 1 OS=Homo sapiens GN=HNRNPUL1 PE=1 SV=2	3.50467	2	2	2	1	856	95.7	6.92
P17987	T-complex protein 1 subunit alpha OS=Homo sapiens GN=TCP1 PE=1 SV=1	5.21583	1	1	1	1	556	60.3	6.11
Q8NBN3	Transmembrane protein 87A OS=Homo sapiens GN=TMEM87A PE=1 SV=3	3.6036	1	1	1	1	555	63.4	6.74
Q96PK6	RNA-binding protein 14 OS=Homo sapiens GN=RBM14 PE=1 SV=2	3.58744	1	1	1	1	669	69.4	9.67
Q9H9P8	L-2-hydroxyglutarate dehydrogenase, mitochondrial OS=Homo sapiens GN=L2HGDH PE=1 SV=3	5.61555	1	1	1	1	463	50.3	8.15
O95470	Sphingosine-1-phosphate lyase 1 OS=Homo sapiens GN=SGPL1 PE=1 SV=3	2.64085	1	1	1	1	568	63.5	9.16
Q15427	Splicing factor 3B subunit 4 OS=Homo sapiens GN=SF3B4 PE=1 SV=1	5.42453	1	1	1	1	424	44.4	8.56
Q99614	Tetratricopeptide repeat protein 1 OS=Homo sapiens GN=TTC1 PE=1 SV=1	6.84932	1	1	1	1	292	33.5	4.84
Q8IWT6	Volume-regulated anion channel subunit LRRC8A OS=Homo sapiens GN=LRRC8A PE=1 SV=1	3.82716	1	1	1	1	810	94.1	7.94
P24311	Cytochrome c oxidase subunit 7B, mitochondrial OS=Homo sapiens GN=COX7B PE=1 SV=2	10	2	3	2	1	80	9.2	10.27
Q92506	Estradiol 17-beta-dehydrogenase 8 OS=Homo sapiens GN=HSD17B8 PE=1 SV=2	5.74713	1	1	1	1	261	27	6.54
Q8IVF2	Protein AHNAK2 OS=Homo sapiens GN=AHNAK2 PE=1 SV=2	1.50129	3	3	2	1	5795	616.2	5.36
P16152	Carbonyl reductase [NADPH] 1 OS=Homo sapiens GN=CBR1 PE=1 SV=3	10.8303	1	1	1	1	277	30.4	8.32
Q86VR2	Protein FAM134C OS=Homo sapiens GN=FAM134C PE=1 SV=1	3.21888	1	1	1	1	466	51.4	4.97
P82909	28S ribosomal protein S36, mitochondrial OS=Homo sapiens GN=MRPS36 PE=1 SV=2	28.1553	2	2	2	1	103	11.5	9.99
P18077	60S ribosomal protein L35a OS=Homo sapiens GN=RPL35A PE=1 SV=2	23.6364	3	3	3	1	110	12.5	11.06
Q9BV79	Trans-2-enoyl-CoA reductase, mitochondrial OS=Homo sapiens GN=MECR PE=1 SV=2	3.75335	1	1	1	1	373	40.4	8.76
P30533	Alpha-2-macroglobulin receptor-associated protein OS=Homo sapiens GN=LRPAP1 PE=1 SV=1	4.48179	2	2	2	1	357	41.4	8.78
O75879	Glutamyl-tRNA(Gln) amidotransferase subunit B, mitochondrial OS=Homo sapiens GN=GATB PE=1 SV=1	4.48833	1	1	1	1	557	61.8	8.63
Q14847	Isoform 2 of LIM and SH3 domain protein 1 OS=Homo sapiens GN=LASP1	13.6223	1	1	1	1	323	36	8.62
P20700	Lamin-B1 OS=Homo sapiens GN=LMNB1 PE=1 SV=2	6.48464	2	2	1	1	586	66.4	5.16
Q9H4M9	EH domain-containing protein 1 OS=Homo sapiens GN=EHD1 PE=1 SV=2	11.0487	2	2	2	1	534	60.6	6.83
Q6PI48	Aspartate--tRNA ligase, mitochondrial OS=Homo sapiens GN=DARS2 PE=1 SV=1	4.34109	2	2	2	1	645	73.5	8.02
Q6NUQ4	Transmembrane protein 214 OS=Homo sapiens GN=TMEM214 PE=1 SV=2	3.0479	1	1	1	1	689	77.1	9.14
Q9NRW7	Vacuolar protein sorting-associated protein 45 OS=Homo sapiens GN=VPS45 PE=1 SV=1	4.5614	1	1	1	1	570	65	8.24
Q08722	Leukocyte surface antigen CD47 OS=Homo sapiens GN=CD47 PE=1 SV=1	6.19195	2	3	2	1	323	35.2	7.21
P00395	Cytochrome c oxidase subunit 1 OS=Homo sapiens GN=MT-CO1 PE=1 SV=1	6.04288	1	1	1	1	513	57	6.7
Q8NEW0	Zinc transporter 7 OS=Homo sapiens GN=SLC30A7 PE=2 SV=1	4.25532	1	1	1	1	376	41.6	6.95
Q9Y2S7	Polymerase delta-interacting protein 2 OS=Homo sapiens GN=POLDIP2 PE=1 SV=1	13.587	2	2	2	1	368	42	8.63
Q9UBQ7	Glyoxylate reductase/hydroxypyruvate reductase OS=Homo sapiens GN=GRHPR PE=1 SV=1	7.31707	1	1	1	1	328	35.6	7.39
P29728	2'-5'-oligoadenylate synthase 2 OS=Homo sapiens GN=OAS2 PE=1 SV=3	5.14604	1	1	1	1	719	82.4	8.25
Q53H82	Endoribonuclease LACTB2 OS=Homo sapiens GN=LACTB2 PE=1 SV=2	6.94444	1	1	1	1	288	32.8	6.8
O43464	Serine protease HTRA2, mitochondrial OS=Homo sapiens GN=HTRA2 PE=1 SV=2	5.24017	1	1	1	1	458	48.8	10.07
Q16181	Septin-7 OS=Homo sapiens GN=SEPT7 PE=1 SV=2	5.26316	1	2	1	1	437	50.6	8.63
Q9Y2Z9	Ubiquinone biosynthesis monooxygenase COQ6, mitochondrial OS=Homo sapiens GN=COQ6 PE=1 SV=2	8.11966	1	1	1	1	468	50.8	7.3
Q9UHX1	Poly(U)-binding-splicing factor PUF60 OS=Homo sapiens GN=PUF60 PE=1 SV=1	5.54562	1	1	1	1	559	59.8	5.29
Q9BQ95	Evolutionarily conserved signaling intermediate in Toll pathway, mitochondrial OS=Homo sapiens GN=ECSIT PE=1 SV=1	6.2645	1	1	1	1	431	49.1	6.29
Q9Y4P3	Transducin beta-like protein 2 OS=Homo sapiens GN=TBL2 PE=1 SV=1	5.14541	2	2	2	1	447	49.8	9.44
Q92843	Isoform 3 of Bcl-2-like protein 2 OS=Homo sapiens GN=BCL2L2	3.3033	1	1	1	1	333	37.1	8.13
P10599	Thioredoxin OS=Homo sapiens GN=TXN PE=1 SV=3	12.381	1	1	1	1	105	11.7	4.92
P03928	ATP synthase protein 8 OS=Homo sapiens GN=MT-ATP8 PE=1 SV=1	13.2353	1	2	1	1	68	8	9.91
P48509	CD151 antigen OS=Homo sapiens GN=CD151 PE=1 SV=3	8.69565	3	3	3	1	253	28.3	7.47
Q9H1C7	Cysteine-rich and transmembrane domain-containing protein 1 OS=Homo sapiens GN=CYSTM1 PE=1 SV=1	10.3093	1	1	1	1	97	10.6	4.32
P16219	Short-chain specific acyl-CoA dehydrogenase, mitochondrial OS=Homo sapiens GN=ACADS PE=1 SV=1	3.15534	1	1	1	1	412	44.3	7.99
P13498	Cytochrome b-245 light chain OS=Homo sapiens GN=CYBA PE=1 SV=3	15.8974	1	1	1	1	195	21	9.54
P40121	Macrophage-capping protein OS=Homo sapiens GN=CAPG PE=1 SV=2	3.73563	1	1	1	1	348	38.5	6.19
O43291	Kunitz-type protease inhibitor 2 OS=Homo sapiens GN=SPINT2 PE=1 SV=2	4.7619	1	1	1	1	252	28.2	8.29
P37108	Signal recognition particle 14 kDa protein OS=Homo sapiens GN=SRP14 PE=1 SV=2	9.55882	1	1	1	1	136	14.6	10.04
Q9P2X0	Isoform 2 of Dolichol-phosphate mannosyltransferase subunit 3 OS=Homo sapiens GN=DPM3	8.19672	1	1	1	1	122	13.3	8.35
P14091	Cathepsin E OS=Homo sapiens GN=CTSE PE=1 SV=2	3.99002	2	2	2	1	401	43.3	4.86
P29401	Isoform 2 of Transketolase OS=Homo sapiens GN=TKT	2.85261	1	2	1	1	631	68.8	7.52
P42285	Superkiller viralicidic activity 2-like 2 OS=Homo sapiens GN=SKIV2L2 PE=1 SV=3	2.01536	1	1	1	1	1042	117.7	6.52
P13284	Gamma-interferon-inducible lysosomal thiol reductase OS=Homo sapiens GN=IFI30 PE=1 SV=3	15.2	1	1	1	1	250	27.9	4.88
O00159	Unconventional myosin-Ic OS=Homo sapiens GN=MYO1C PE=1 SV=4	1.88147	1	1	1	1	1063	121.6	9.41
Q9NUM3	Zinc transporter ZIP9 OS=Homo sapiens GN=SLC39A9 PE=2 SV=2	4.88599	1	1	1	1	307	32.2	6.71
Q9P2W9	Syntaxin-18 OS=Homo sapiens GN=STX18 PE=1 SV=1	6.86567	1	1	1	1	335	38.7	5.49
Q96AG3	Solute carrier family 25 member 46 OS=Homo sapiens GN=SLC25A46 PE=1 SV=1	5.26316	1	1	1	1	418	46.1	7.43
P49368	T-complex protein 1 subunit gamma OS=Homo sapiens GN=CCT3 PE=1 SV=4	5.13761	1	1	1	1	545	60.5	6.49
P46782	40S ribosomal protein S5 OS=Homo sapiens GN=RPS5 PE=1 SV=4	7.35294	1	1	1	1	204	22.9	9.72
Q04941	Proteolipid protein 2 OS=Homo sapiens GN=PLP2 PE=1 SV=1	8.55263	1	1	1	1	152	16.7	7.24
Q8N4Q0	Zinc-binding alcohol dehydrogenase domain-containing protein 2 OS=Homo sapiens GN=ZADH2 PE=1 SV=1	7.69231	1	1	1	1	377	40.1	8.18
O15427	Monocarboxylate transporter 4 OS=Homo sapiens GN=SLC16A3 PE=1 SV=1	2.7957	1	1	1	1	465	49.4	7.96
P18206	Vinculin OS=Homo sapiens GN=VCL PE=1 SV=4	1.85185	1	1	1	1	1134	123.7	5.66
P56385	ATP synthase subunit e, mitochondrial OS=Homo sapiens GN=ATP5I PE=1 SV=2	24.6377	2	2	2	1	69	7.9	9.35
Q9BYD3	39S ribosomal protein L4, mitochondrial OS=Homo sapiens GN=MRPL4 PE=1 SV=1	3.53698	1	1	1	1	311	34.9	9.72
Q9GZY8	Mitochondrial fission factor OS=Homo sapiens GN=MFF PE=1 SV=1	4.67836	1	1	1	1	342	38.4	8.95
Q4KMQ2	Isoform 2 of Anoctamin-6 OS=Homo sapiens GN=ANO6	2.36305	1	2	1	1	931	108.4	7.87
Q9NUM4	Transmembrane protein 106B OS=Homo sapiens GN=TMEM106B PE=1 SV=2	4.74453	1	1	1	1	274	31.1	6.99
O60613	15 kDa selenoprotein OS=Homo sapiens GN=SEP15 PE=1 SV=3	8.02469	1	1	1	1	162	17.8	5.03
P06703	Protein S100-A6 OS=Homo sapiens GN=S100A6 PE=1 SV=1	16.6667	2	2	2	1	90	10.2	5.48
Q9GZP9	Derlin-2 OS=Homo sapiens GN=DERL2 PE=1 SV=1	12.5523	1	2	1	1	239	27.5	7.28
Q93050	Isoform 3 of V-type proton ATPase 116 kDa subunit a isoform 1 OS=Homo sapiens GN=ATP6V0A1	3.93795	1	1	1	1	838	96.5	6.64
P05386	60S acidic ribosomal protein P1 OS=Homo sapiens GN=RPLP1 PE=1 SV=1	14.0351	1	1	1	1	114	11.5	4.32
Q969M3	Isoform 3 of Protein YIPF5 OS=Homo sapiens GN=YIPF5	4.5283	1	1	1	1	265	29.1	4.46
Q9UBR2	Cathepsin Z OS=Homo sapiens GN=CTSZ PE=1 SV=1	9.57096	2	2	2	1	303	33.8	7.11
Q8N6T3	Isoform 2 of ADP-ribosylation factor GTPase-activating protein 1 OS=Homo sapiens GN=ARFGAP1	10.1449	1	1	1	1	414	45.6	5.78
P14678	Isoform SM-B1 of Small nuclear ribonucleoprotein-associated proteins B and B' OS=Homo sapiens GN=SNRPB	4.84429	2	2	2	1	289	30	10.18
P63173	60S ribosomal protein L38 OS=Homo sapiens GN=RPL38 PE=1 SV=2	18.5714	1	1	1	1	70	8.2	10.1
Q9H2D1	Mitochondrial folate transporter/carrier OS=Homo sapiens GN=SLC25A32 PE=1 SV=2	7.93651	1	1	1	1	315	35.4	9.45
Q7Z3D6	Isoform 2 of UPF0317 protein C14orf159, mitochondrial OS=Homo sapiens GN=C14orf159	6.11916	1	2	1	1	621	66.9	6.87
Q92485	Acid sphingomyelinase-like phosphodiesterase 3b OS=Homo sapiens GN=SMPDL3B PE=1 SV=2	2.1978	1	1	1	1	455	50.8	5.64
Q6UW68	Transmembrane protein 205 OS=Homo sapiens GN=TMEM205 PE=1 SV=1	8.99471	1	1	1	1	189	21.2	8.62
Q6ZMG9	Isoform 2 of Ceramide synthase 6 OS=Homo sapiens GN=CERS6	4.33673	2	2	2	1	392	45.8	7.87
Q86SF2	N-acetylgalactosaminyltransferase 7 OS=Homo sapiens GN=GALNT7 PE=1 SV=1	3.34855	2	2	2	1	657	75.3	7.11
Q10589	Bone marrow stromal antigen 2 OS=Homo sapiens GN=BST2 PE=1 SV=1	5.55556	1	1	1	1	180	19.8	5.6
Q9UBM7	7-dehydrocholesterol reductase OS=Homo sapiens GN=DHCR7 PE=1 SV=1	2.73684	1	1	1	1	475	54.5	8.7
O95218	Zinc finger Ran-binding domain-containing protein 2 OS=Homo sapiens GN=ZRANB2 PE=1 SV=2	4.84848	1	1	1	1	330	37.4	10.01
Q9Y6Q5	Isoform 2 of AP-1 complex subunit mu-2 OS=Homo sapiens GN=AP1M2	4	1	1	1	1	425	48.2	7.91
P63208	S-phase kinase-associated protein 1 OS=Homo sapiens GN=SKP1 PE=1 SV=2	11.6564	1	1	1	1	163	18.6	4.54
P14174	Macrophage migration inhibitory factor OS=Homo sapiens GN=MIF PE=1 SV=4	47.8261	1	1	1	1	115	12.5	7.88
O95881	Thioredoxin domain-containing protein 12 OS=Homo sapiens GN=TXNDC12 PE=1 SV=1	22.6744	1	1	1	1	172	19.2	5.4
O43760	Isoform 2 of Synaptogyrin-2 OS=Homo sapiens GN=SYNGR2	3.63636	1	1	1	1	275	30.4	9.2
Q99590	Protein SCAF11 OS=Homo sapiens GN=SCAF11 PE=1 SV=2	1.70882	1	1	1	1	1463	164.6	8.41
P56856	Claudin-18 OS=Homo sapiens GN=CLDN18 PE=2 SV=1	4.21456	1	1	1	1	261	27.8	8.1
P21980	Protein-glutamine gamma-glutamyltransferase 2 OS=Homo sapiens GN=TGM2 PE=1 SV=2	3.93013	1	1	1	1	687	77.3	5.22
O15258	Protein RER1 OS=Homo sapiens GN=RER1 PE=1 SV=1	5.61224	1	1	1	1	196	22.9	9.54
P62277	40S ribosomal protein S13 OS=Homo sapiens GN=RPS13 PE=1 SV=2	9.93377	1	1	1	1	151	17.2	10.54
P61225	Ras-related protein Rap-2b OS=Homo sapiens GN=RAP2B PE=1 SV=1	6.55738	1	1	1	1	183	20.5	4.81
O43143	Pre-mRNA-splicing factor ATP-dependent RNA helicase DHX15 OS=Homo sapiens GN=DHX15 PE=1 SV=2	1.50943	1	1	1	1	795	90.9	7.46
Q9Y2R5	28S ribosomal protein S17, mitochondrial OS=Homo sapiens GN=MRPS17 PE=1 SV=1	22.3077	1	1	1	1	130	14.5	9.85
Q5T440	Putative transferase CAF17, mitochondrial OS=Homo sapiens GN=IBA57 PE=1 SV=1	9.26966	1	1	1	1	356	38.1	9.83
O60437	Periplakin OS=Homo sapiens GN=PPL PE=1 SV=4	1.36674	2	2	2	1	1756	204.6	5.6
O75439	Mitochondrial-processing peptidase subunit beta OS=Homo sapiens GN=PMPCB PE=1 SV=2	3.68098	2	2	1	1	489	54.3	6.83
O95070	Protein YIF1A OS=Homo sapiens GN=YIF1A PE=1 SV=2	6.48464	1	1	1	1	293	32	8.95
O14910	Protein lin-7 homolog A OS=Homo sapiens GN=LIN7A PE=1 SV=2	4.29185	1	1	1	1	233	26	8.72
P00749	Urokinase-type plasminogen activator OS=Homo sapiens GN=PLAU PE=1 SV=2	4.64037	1	1	1	1	431	48.5	8.41
Q969S9	Ribosome-releasing factor 2, mitochondrial OS=Homo sapiens GN=GFM2 PE=1 SV=1	3.46598	1	1	1	1	779	86.5	6.51
O43493	Trans-Golgi network integral membrane protein 2 OS=Homo sapiens GN=TGOLN2 PE=1 SV=2	2.91667	1	1	1	1	480	51.1	5.73
O75146	Huntingtin-interacting protein 1-related protein OS=Homo sapiens GN=HIP1R PE=1 SV=2	3.18352	1	1	1	1	1068	119.3	6.67
Q6WKZ4	Rab11 family-interacting protein 1 OS=Homo sapiens GN=RAB11FIP1 PE=1 SV=3	2.80592	2	2	2	1	1283	137.1	5.43
P00846	ATP synthase subunit a OS=Homo sapiens GN=MT-ATP6 PE=1 SV=1	4.42478	1	1	1	1	226	24.8	10.1
O75380	NADH dehydrogenase [ubiquinone] iron-sulfur protein 6, mitochondrial OS=Homo sapiens GN=NDUFS6 PE=1 SV=1	12.0968	1	1	1	1	124	13.7	8.28
Q969Z0	Protein TBRG4 OS=Homo sapiens GN=TBRG4 PE=1 SV=1	2.69414	1	1	1	1	631	70.7	7.42
P05121	Plasminogen activator inhibitor 1 OS=Homo sapiens GN=SERPINE1 PE=1 SV=1	4.97512	1	1	1	1	402	45	7.2
O00217	NADH dehydrogenase [ubiquinone] iron-sulfur protein 8, mitochondrial OS=Homo sapiens GN=NDUFS8 PE=1 SV=1	4.28571	1	1	1	1	210	23.7	6.34
P29590	Protein PML OS=Homo sapiens GN=PML PE=1 SV=3	2.49433	1	1	1	1	882	97.5	6.21
O43278	Kunitz-type protease inhibitor 1 OS=Homo sapiens GN=SPINT1 PE=1 SV=2	2.0794	1	1	1	1	529	58.4	6.29
Q01518	Adenylyl cyclase-associated protein 1 OS=Homo sapiens GN=CAP1 PE=1 SV=5	4.84211	1	1	1	1	475	51.9	8.06
P30408	Transmembrane 4 L6 family member 1 OS=Homo sapiens GN=TM4SF1 PE=1 SV=1	4.45545	1	2	1	1	202	21.6	4.98
Q14BN4	Sarcolemmal membrane-associated protein OS=Homo sapiens GN=SLMAP PE=1 SV=1	3.1401	1	1	1	1	828	95.1	5.47
Q9BVT8	Transmembrane and ubiquitin-like domain-containing protein 1 OS=Homo sapiens GN=TMUB1 PE=1 SV=1	4.06504	1	1	1	1	246	26.2	5.72
Q16891	MICOS complex subunit MIC60 OS=Homo sapiens GN=IMMT PE=1 SV=1	1.71504	1	1	1	1	758	83.6	6.48
Q9BTU6	Phosphatidylinositol 4-kinase type 2-alpha OS=Homo sapiens GN=PI4K2A PE=1 SV=1	2.29645	1	1	1	1	479	54	8.29
P55327	Isoform 3 of Tumor protein D52 OS=Homo sapiens GN=TPD52	12.5	1	1	1	1	248	26.4	6.34
Q9BVC6	Transmembrane protein 109 OS=Homo sapiens GN=TMEM109 PE=1 SV=1	4.93827	1	1	1	1	243	26.2	10.48
Q9UHA4	Ragulator complex protein LAMTOR3 OS=Homo sapiens GN=LAMTOR3 PE=1 SV=1	22.5806	1	1	1	1	124	13.6	7.34
Q9BQB6	Vitamin K epoxide reductase complex subunit 1 OS=Homo sapiens GN=VKORC1 PE=1 SV=1	7.97546	1	1	1	1	163	18.2	9.36
Q14061	Cytochrome c oxidase copper chaperone OS=Homo sapiens GN=COX17 PE=1 SV=2	20.6349	1	1	1	1	63	6.9	7.24
P09234	U1 small nuclear ribonucleoprotein C OS=Homo sapiens GN=SNRPC PE=1 SV=1	5.66038	1	1	1	1	159	17.4	9.67
Q9NP81	Isoform 2 of Serine--tRNA ligase, mitochondrial OS=Homo sapiens GN=SARS2	3.46154	1	1	1	1	520	58	7.36
P09874	Poly [ADP-ribose] polymerase 1 OS=Homo sapiens GN=PARP1 PE=1 SV=4	2.95858	1	1	1	1	1014	113	8.88
Q00536	Isoform 2 of Cyclin-dependent kinase 16 OS=Homo sapiens GN=CDK16	2.45614	2	2	2	1	570	63.4	8.13
Q86VP6	Cullin-associated NEDD8-dissociated protein 1 OS=Homo sapiens GN=CAND1 PE=1 SV=2	1.54472	1	1	1	1	1230	136.3	5.78
Q08379	Golgin subfamily A member 2 OS=Homo sapiens GN=GOLGA2 PE=1 SV=3	1.1976	1	1	1	1	1002	113	5.02
Q9NRG9	Aladin OS=Homo sapiens GN=AAAS PE=1 SV=1	5.86081	1	1	1	1	546	59.5	7.5
Q9BW60	Elongation of very long chain fatty acids protein 1 OS=Homo sapiens GN=ELOVL1 PE=1 SV=1	4.30108	1	1	1	1	279	32.6	9.6
Q8IWS0	PHD finger protein 6 OS=Homo sapiens GN=PHF6 PE=1 SV=1	3.0137	1	1	1	1	365	41.3	8.68
Q9UN86	Ras GTPase-activating protein-binding protein 2 OS=Homo sapiens GN=G3BP2 PE=1 SV=2	2.6971	1	1	1	1	482	54.1	5.55
P78347	General transcription factor II-I OS=Homo sapiens GN=GTF2I PE=1 SV=2	2.90581	1	2	1	1	998	112.3	6.39
O14734	Acyl-coenzyme A thioesterase 8 OS=Homo sapiens GN=ACOT8 PE=1 SV=1	7.21003	1	1	1	1	319	35.9	7.56
Q96HS1	Serine/threonine-protein phosphatase PGAM5, mitochondrial OS=Homo sapiens GN=PGAM5 PE=1 SV=2	4.15225	1	1	1	1	289	32	8.68
O43809	Cleavage and polyadenylation specificity factor subunit 5 OS=Homo sapiens GN=NUDT21 PE=1 SV=1	6.60793	1	1	1	1	227	26.2	8.82
Q9NZQ7	Programmed cell death 1 ligand 1 OS=Homo sapiens GN=CD274 PE=1 SV=1	7.58621	1	2	1	1	290	33.3	7.23
P11182	Lipoamide acyltransferase component of branched-chain alpha-keto acid dehydrogenase complex, mitochondrial OS=Homo sapiens GN=DBT PE=1 SV=3	1.86722	1	1	1	1	482	53.5	8.51
P07203	Glutathione peroxidase 1 OS=Homo sapiens GN=GPX1 PE=1 SV=4	8.37438	1	1	1	1	203	22.1	6.55
Q8IZ81	ELMO domain-containing protein 2 OS=Homo sapiens GN=ELMOD2 PE=1 SV=1	9.21502	1	1	1	1	293	34.9	8.05
O75643	U5 small nuclear ribonucleoprotein 200 kDa helicase OS=Homo sapiens GN=SNRNP200 PE=1 SV=2	1.17041	1	1	1	1	2136	244.4	6.06
O00515	Ladinin-1 OS=Homo sapiens GN=LAD1 PE=1 SV=2	2.32108	1	1	1	1	517	57.1	9.67
Q13445	Transmembrane emp24 domain-containing protein 1 OS=Homo sapiens GN=TMED1 PE=1 SV=1	7.48899	1	1	1	1	227	25.2	4.48
O95858	Tetraspanin-15 OS=Homo sapiens GN=TSPAN15 PE=1 SV=1	4.08163	1	1	1	1	294	33.1	5.48
P51398	28S ribosomal protein S29, mitochondrial OS=Homo sapiens GN=DAP3 PE=1 SV=1	5.02513	1	1	1	1	398	45.5	8.88
Q9UKU7	Isobutyryl-CoA dehydrogenase, mitochondrial OS=Homo sapiens GN=ACAD8 PE=1 SV=1	2.40964	1	1	1	1	415	45	7.85
P23434	Glycine cleavage system H protein, mitochondrial OS=Homo sapiens GN=GCSH PE=1 SV=2	5.78035	1	1	1	1	173	18.9	4.88
P60174	Triosephosphate isomerase OS=Homo sapiens GN=TPI1 PE=1 SV=3	10.1399	1	1	1	1	286	30.8	5.92
P10109	Adrenodoxin, mitochondrial OS=Homo sapiens GN=FDX1 PE=1 SV=1	4.8913	1	1	1	1	184	19.4	5.83
Q9H330	Transmembrane protein 245 OS=Homo sapiens GN=TMEM245 PE=1 SV=2	1.427	1	1	1	1	911	100.9	8.87
P62891	60S ribosomal protein L39 OS=Homo sapiens GN=RPL39 PE=1 SV=2	19.6078	1	1	1	1	51	6.4	12.56
Q9NRP2	COX assembly mitochondrial protein 2 homolog OS=Homo sapiens GN=CMC2 PE=1 SV=1	12.6582	1	1	1	1	79	9.5	7.87
Q96IX5	Up-regulated during skeletal muscle growth protein 5 OS=Homo sapiens GN=USMG5 PE=1 SV=1	17.2414	1	1	1	1	58	6.5	9.76
P14209	CD99 antigen OS=Homo sapiens GN=CD99 PE=1 SV=1	5.40541	1	1	1	1	185	18.8	4.75
Q969E2	Secretory carrier-associated membrane protein 4 OS=Homo sapiens GN=SCAMP4 PE=1 SV=1	4.80349	1	1	1	1	229	25.7	8.82
P81605	Dermcidin OS=Homo sapiens GN=DCD PE=1 SV=2	22.7273	2	2	2	1	110	11.3	6.54
Q969X1	Protein lifeguard 3 OS=Homo sapiens GN=TMBIM1 PE=1 SV=2	4.50161	1	1	1	1	311	34.6	7.72
P62861	40S ribosomal protein S30 OS=Homo sapiens GN=FAU PE=1 SV=1	16.9492	1	1	1	1	59	6.6	12.15
Q96RT1	Isoform 8 of Erbin OS=Homo sapiens GN=ERBIN	1.55039	1	1	1	1	1419	158.9	5.63
Q3ZAQ7	Vacuolar ATPase assembly integral membrane protein VMA21 OS=Homo sapiens GN=VMA21 PE=1 SV=1	11.8812	1	1	1	1	101	11.3	7.24
Q13283	Ras GTPase-activating protein-binding protein 1 OS=Homo sapiens GN=G3BP1 PE=1 SV=1	2.14592	1	1	1	1	466	52.1	5.52
Q8WUY1	Protein THEM6 OS=Homo sapiens GN=THEM6 PE=1 SV=2	12.5	1	1	1	1	208	23.9	9.55
Q7Z4W1	L-xylulose reductase OS=Homo sapiens GN=DCXR PE=1 SV=2	4.09836	1	1	1	1	244	25.9	8.1
P15586	N-acetylglucosamine-6-sulfatase OS=Homo sapiens GN=GNS PE=1 SV=3	5.07246	1	1	1	1	552	62	8.31
Q9C0H2	Isoform 4 of Protein tweety homolog 3 OS=Homo sapiens GN=TTYH3	2.6616	1	1	1	1	526	57.9	5.31
P83731	60S ribosomal protein L24 OS=Homo sapiens GN=RPL24 PE=1 SV=1	5.73248	1	1	1	1	157	17.8	11.25
Q5JTJ3	Isoform 2 of Cytochrome c oxidase assembly factor 6 homolog OS=Homo sapiens GN=COA6	8.33333	1	1	1	1	156	18.1	10.1
O43819	Protein SCO2 homolog, mitochondrial OS=Homo sapiens GN=SCO2 PE=1 SV=3	3.7594	1	2	1	1	266	29.8	8.85
P02749	Beta-2-glycoprotein 1 OS=Homo sapiens GN=APOH PE=1 SV=3	2.6087	1	1	1	1	345	38.3	7.97
Q9BWF3	RNA-binding protein 4 OS=Homo sapiens GN=RBM4 PE=1 SV=1	7.69231	1	1	1	1	364	40.3	7.08
Q9H078	Caseinolytic peptidase B protein homolog OS=Homo sapiens GN=CLPB PE=1 SV=1	2.9703	1	1	1	1	707	78.7	9.01
Q9Y3D3	28S ribosomal protein S16, mitochondrial OS=Homo sapiens GN=MRPS16 PE=1 SV=1	13.1387	1	1	1	1	137	15.3	9.5
Q969L2	Protein MAL2 OS=Homo sapiens GN=MAL2 PE=1 SV=1	6.25	1	1	1	1	176	19.1	6.24
Q8TDL5	BPI fold-containing family B member 1 OS=Homo sapiens GN=BPIFB1 PE=1 SV=1	5.3719	1	1	1	1	484	52.4	7.23
Q9Y3U8	60S ribosomal protein L36 OS=Homo sapiens GN=RPL36 PE=1 SV=3	9.52381	1	1	1	1	105	12.2	11.59
Q9H3P7	Golgi resident protein GCP60 OS=Homo sapiens GN=ACBD3 PE=1 SV=4	3.0303	1	1	1	1	528	60.6	5.06
P55854	Isoform 2 of Small ubiquitin-related modifier 3 OS=Homo sapiens GN=SUMO3	8.51064	1	1	1	1	141	15.8	6.92
A8MXV4	Nucleoside diphosphate-linked moiety X motif 19 OS=Homo sapiens GN=NUDT19 PE=1 SV=1	7.2	1	1	1	1	375	42.2	7.64
Q7L0Y3	Mitochondrial ribonuclease P protein 1 OS=Homo sapiens GN=TRMT10C PE=1 SV=2	5.95533	1	1	1	1	403	47.3	9.36
P26196	Probable ATP-dependent RNA helicase DDX6 OS=Homo sapiens GN=DDX6 PE=1 SV=2	3.51967	1	1	1	1	483	54.4	8.66
Q6PI78	Transmembrane protein 65 OS=Homo sapiens GN=TMEM65 PE=1 SV=2	4.16667	1	1	1	1	240	25.5	8.6
Q5XKP0	MICOS complex subunit MIC13 OS=Homo sapiens GN=MIC13 PE=1 SV=1	27.1186	1	1	1	1	118	13.1	9.42
Q96I23	Protein preY, mitochondrial OS=Homo sapiens GN=PYURF PE=1 SV=1	19.2982	1	1	1	1	114	12.6	9.33
Q15629	Translocating chain-associated membrane protein 1 OS=Homo sapiens GN=TRAM1 PE=1 SV=3	2.94118	1	1	1	1	374	43	9.63
P62841	40S ribosomal protein S15 OS=Homo sapiens GN=RPS15 PE=1 SV=2	8.96552	1	1	1	1	145	17	10.39
O43292	Glycosylphosphatidylinositol anchor attachment 1 protein OS=Homo sapiens GN=GPAA1 PE=1 SV=3	5.47504	1	1	1	1	621	67.6	8.06
Q9UBX3	Isoform 2 of Mitochondrial dicarboxylate carrier OS=Homo sapiens GN=SLC25A10	3.71622	1	1	1	1	296	32.1	9.35
Q9UFN0	Protein NipSnap homolog 3A OS=Homo sapiens GN=NIPSNAP3A PE=1 SV=2	12.5506	1	1	1	1	247	28.4	9.16
P30536	Translocator protein OS=Homo sapiens GN=TSPO PE=1 SV=3	4.73373	1	1	1	1	169	18.8	9.36
O14925	Mitochondrial import inner membrane translocase subunit Tim23 OS=Homo sapiens GN=TIMM23 PE=1 SV=1	10.5263	1	1	1	1	209	21.9	8.6
O43670	Isoform 4 of BUB3-interacting and GLEBS motif-containing protein ZNF207 OS=Homo sapiens GN=ZNF207	2.63158	1	1	1	1	494	52.7	9.1
Q9BUN8	Derlin-1 OS=Homo sapiens GN=DERL1 PE=1 SV=1	4.38247	1	1	1	1	251	28.8	9.51
Q9Y676	28S ribosomal protein S18b, mitochondrial OS=Homo sapiens GN=MRPS18B PE=1 SV=1	3.87597	1	1	1	1	258	29.4	9.38
Q9NU22	Midasin OS=Homo sapiens GN=MDN1 PE=1 SV=2	0.125089	1	2	1	1	5596	632.4	5.68
Q9H0U3	Magnesium transporter protein 1 OS=Homo sapiens GN=MAGT1 PE=1 SV=1	5.07463	2	2	2	1	335	38	9.63
O15533	Isoform 3 of Tapasin OS=Homo sapiens GN=TAPBP	5.95238	1	1	1	1	504	53.9	7.23
O75821	Eukaryotic translation initiation factor 3 subunit G OS=Homo sapiens GN=EIF3G PE=1 SV=2	5	1	1	1	1	320	35.6	6.13
Q96BI1	Solute carrier family 22 member 18 OS=Homo sapiens GN=SLC22A18 PE=1 SV=3	2.83019	1	1	1	1	424	44.8	9.57
P56381	ATP synthase subunit epsilon, mitochondrial OS=Homo sapiens GN=ATP5E PE=1 SV=2	13.7255	1	1	1	1	51	5.8	9.92
Q9UHQ9	NADH-cytochrome b5 reductase 1 OS=Homo sapiens GN=CYB5R1 PE=1 SV=1	2.62295	1	1	1	1	305	34.1	9.38
P07858	Cathepsin B OS=Homo sapiens GN=CTSB PE=1 SV=3	2.35988	1	1	1	1	339	37.8	6.3
Q9BQ69	O-acetyl-ADP-ribose deacetylase MACROD1 OS=Homo sapiens GN=MACROD1 PE=1 SV=2	3.07692	1	1	1	1	325	35.5	9.51
P24534	Elongation factor 1-beta OS=Homo sapiens GN=EEF1B2 PE=1 SV=3	14.2222	1	1	1	1	225	24.7	4.67
P05067	Amyloid beta A4 protein OS=Homo sapiens GN=APP PE=1 SV=3	1.55844	1	1	1	1	770	86.9	4.82
Q15691	Microtubule-associated protein RP/EB family member 1 OS=Homo sapiens GN=MAPRE1 PE=1 SV=3	6.71642	1	1	1	1	268	30	5.14
O43657	Tetraspanin-6 OS=Homo sapiens GN=TSPAN6 PE=1 SV=1	3.26531	1	1	1	1	245	27.5	8.1
Q9UDW1	Cytochrome b-c1 complex subunit 9 OS=Homo sapiens GN=UQCR10 PE=1 SV=3	26.9841	1	1	1	1	63	7.3	9.47
Q8N0U8	Isoform 2 of Vitamin K epoxide reductase complex subunit 1-like protein 1 OS=Homo sapiens GN=VKORC1L1	4.51977	1	1	1	1	177	19.7	8.65
O60832	H/ACA ribonucleoprotein complex subunit 4 OS=Homo sapiens GN=DKC1 PE=1 SV=3	1.94553	1	1	1	1	514	57.6	9.42
Q9P0U1	Mitochondrial import receptor subunit TOM7 homolog OS=Homo sapiens GN=TOMM7 PE=1 SV=1	30.9091	1	2	1	1	55	6.2	10.29
P15291	Beta-1,4-galactosyltransferase 1 OS=Homo sapiens GN=B4GALT1 PE=1 SV=5	7.28643	1	1	1	1	398	43.9	8.65
O75964	ATP synthase subunit g, mitochondrial OS=Homo sapiens GN=ATP5L PE=1 SV=3	8.73786	1	1	1	1	103	11.4	9.64
O43920	NADH dehydrogenase [ubiquinone] iron-sulfur protein 5 OS=Homo sapiens GN=NDUFS5 PE=1 SV=3	11.3208	1	1	1	1	106	12.5	9.14
P15559	NAD(P)H dehydrogenase [quinone] 1 OS=Homo sapiens GN=NQO1 PE=1 SV=1	6.56934	1	1	1	1	274	30.8	8.88
Q14728	Major facilitator superfamily domain-containing protein 10 OS=Homo sapiens GN=MFSD10 PE=1 SV=1	2.85714	1	1	1	1	455	48.3	9.6
Q9UMD9	Collagen alpha-1(XVII) chain OS=Homo sapiens GN=COL17A1 PE=1 SV=3	0.734803	1	1	1	1	1497	150.3	8.79
O14949	Cytochrome b-c1 complex subunit 8 OS=Homo sapiens GN=UQCRQ PE=1 SV=4	13.4146	1	1	1	1	82	9.9	10.08
Q9Y3D9	28S ribosomal protein S23, mitochondrial OS=Homo sapiens GN=MRPS23 PE=1 SV=2	5.26316	1	1	1	1	190	21.8	8.9
Q9HCN8	Stromal cell-derived factor 2-like protein 1 OS=Homo sapiens GN=SDF2L1 PE=1 SV=2	5.88235	1	1	1	1	221	23.6	7.03
P46781	40S ribosomal protein S9 OS=Homo sapiens GN=RPS9 PE=1 SV=3	9.27835	2	2	2	1	194	22.6	10.65
Q6UB35	Monofunctional C1-tetrahydrofolate synthase, mitochondrial OS=Homo sapiens GN=MTHFD1L PE=1 SV=1	1.02249	1	1	1	1	978	105.7	8.06
P62280	40S ribosomal protein S11 OS=Homo sapiens GN=RPS11 PE=1 SV=3	10.1266	2	2	2	1	158	18.4	10.3
O00483	Cytochrome c oxidase subunit NDUFA4 OS=Homo sapiens GN=NDUFA4 PE=1 SV=1	9.87654	1	1	1	1	81	9.4	9.38
P49406	39S ribosomal protein L19, mitochondrial OS=Homo sapiens GN=MRPL19 PE=1 SV=2	4.79452	1	1	1	1	292	33.5	9.5
Q9HC35	Echinoderm microtubule-associated protein-like 4 OS=Homo sapiens GN=EML4 PE=1 SV=3	0.917431	1	1	1	1	981	108.8	6.4
P55957	Isoform 2 of BH3-interacting domain death agonist OS=Homo sapiens GN=BID	6.22407	1	1	1	1	241	26.8	7.08
O60637	Tetraspanin-3 OS=Homo sapiens GN=TSPAN3 PE=2 SV=1	2.7668	1	1	1	1	253	28	5.81
Q9NUQ6	Isoform 3 of SPATS2-like protein OS=Homo sapiens GN=SPATS2L	2.04082	1	1	1	1	588	65.1	9.66
Q9UHD8	Septin-9 OS=Homo sapiens GN=SEPT9 PE=1 SV=2	2.55973	1	1	1	1	586	65.4	8.97
Q9NY12	H/ACA ribonucleoprotein complex subunit 1 OS=Homo sapiens GN=GAR1 PE=1 SV=1	4.14747	1	1	1	1	217	22.3	10.92
P00414	Cytochrome c oxidase subunit 3 OS=Homo sapiens GN=MT-CO3 PE=1 SV=2	5.36398	1	1	1	1	261	29.9	7.31
Q8N5K1	CDGSH iron-sulfur domain-containing protein 2 OS=Homo sapiens GN=CISD2 PE=1 SV=1	11.1111	1	1	1	1	135	15.3	9.61
O95857	Tetraspanin-13 OS=Homo sapiens GN=TSPAN13 PE=2 SV=1	3.92157	1	1	1	1	204	22.1	7.93
A4FU69	EF-hand calcium-binding domain-containing protein 5 OS=Homo sapiens GN=EFCAB5 PE=1 SV=3	0.465735	1	1	1	1	1503	173.3	5.82
Q02252	Methylmalonate-semialdehyde dehydrogenase [acylating], mitochondrial OS=Homo sapiens GN=ALDH6A1 PE=1 SV=2	1.86916	1	1	1	1	535	57.8	8.5
O95182	NADH dehydrogenase [ubiquinone] 1 alpha subcomplex subunit 7 OS=Homo sapiens GN=NDUFA7 PE=1 SV=3	9.73451	1	1	1	1	113	12.5	10.18
Q5VW38	Protein GPR107 OS=Homo sapiens GN=GPR107 PE=1 SV=1	1.83333	1	1	1	1	600	66.9	7.24
P15954	Cytochrome c oxidase subunit 7C, mitochondrial OS=Homo sapiens GN=COX7C PE=1 SV=1	14.2857	1	1	1	1	63	7.2	10.27
P22087	rRNA 2'-O-methyltransferase fibrillarin OS=Homo sapiens GN=FBL PE=1 SV=2	2.80374	1	1	1	1	321	33.8	10.18
O75915	PRA1 family protein 3 OS=Homo sapiens GN=ARL6IP5 PE=1 SV=1	3.7234	1	1	1	1	188	21.6	9.77
Q9Y6K5	2'-5'-oligoadenylate synthase 3 OS=Homo sapiens GN=OAS3 PE=1 SV=3	3.40386	1	1	1	1	1087	121.1	8.4
P78325	Disintegrin and metalloproteinase domain-containing protein 8 OS=Homo sapiens GN=ADAM8 PE=1 SV=2	2.42718	1	1	1	1	824	88.7	7.55
Q7Z7H8	Isoform 2 of 39S ribosomal protein L10, mitochondrial OS=Homo sapiens GN=MRPL10	7.74908	1	1	1	1	271	30.3	9.25
P61158	Actin-related protein 3 OS=Homo sapiens GN=ACTR3 PE=1 SV=3	2.15311	1	1	1	1	418	47.3	5.88
P17948	Vascular endothelial growth factor receptor 1 OS=Homo sapiens GN=FLT1 PE=1 SV=2	0.822123	1	1	1	1	1338	150.7	8.38
Q9C0C9	(E3-independent) E2 ubiquitin-conjugating enzyme OS=Homo sapiens GN=UBE2O PE=1 SV=3	0.619195	1	1	1	1	1292	141.2	5.12
Q32MZ4	Isoform 3 of Leucine-rich repeat flightless-interacting protein 1 OS=Homo sapiens GN=LRRFIP1	1.06383	1	1	1	1	752	82.6	4.61
Q9BYN8	28S ribosomal protein S26, mitochondrial OS=Homo sapiens GN=MRPS26 PE=1 SV=1	3.90244	1	1	1	1	205	24.2	10.39
P23193	Transcription elongation factor A protein 1 OS=Homo sapiens GN=TCEA1 PE=1 SV=2	9.30233	1	1	1	1	301	33.9	8.38
P60903	Protein S100-A10 OS=Homo sapiens GN=S100A10 PE=1 SV=2	6.18557	1	1	1	1	97	11.2	7.37
Q13242	Serine/arginine-rich splicing factor 9 OS=Homo sapiens GN=SRSF9 PE=1 SV=1	4.52489	1	1	1	1	221	25.5	8.65
Q8N823	Zinc finger protein 611 OS=Homo sapiens GN=ZNF611 PE=2 SV=2	0.851064	1	1	1	1	705	81.4	8.9
P82914	28S ribosomal protein S15, mitochondrial OS=Homo sapiens GN=MRPS15 PE=1 SV=1	3.89105	1	1	1	1	257	29.8	10.48
Q9P2K5	Myelin expression factor 2 OS=Homo sapiens GN=MYEF2 PE=1 SV=3	5.5	1	1	1	1	600	64.1	8.75
Q9NR56	Muscleblind-like protein 1 OS=Homo sapiens GN=MBNL1 PE=1 SV=2	1.80412	1	1	1	1	388	41.8	8.9
P61160	Isoform 2 of Actin-related protein 2 OS=Homo sapiens GN=ACTR2	9.02256	1	1	1	1	399	45.3	7.2
Q9P003	Protein cornichon homolog 4 OS=Homo sapiens GN=CNIH4 PE=1 SV=1	14.3885	1	1	1	1	139	16.1	6.65
Q8WZ422	Isoform 12 of Titin OS=Homo sapiens GN=TTN	0.0222278	1	1	1	1	35991	3992.1	6.39
Q8WVB3	Hexosaminidase D OS=Homo sapiens GN=HEXDC PE=2 SV=3	2.26337	1	1	1	1	486	53.8	5.97
O60884	DnaJ homolog subfamily A member 2 OS=Homo sapiens GN=DNAJA2 PE=1 SV=1	3.15534	1	1	1	1	412	45.7	6.48
Q9Y6A9	Signal peptidase complex subunit 1 OS=Homo sapiens GN=SPCS1 PE=1 SV=4	16.6667	1	1	1	1	102	11.8	9.31
Q15582	Transforming growth factor-beta-induced protein ig-h3 OS=Homo sapiens GN=TGFBI PE=1 SV=1	3.22108	1	1	1	1	683	74.6	7.71
Q6ZNB6	NF-X1-type zinc finger protein NFXL1 OS=Homo sapiens GN=NFXL1 PE=1 SV=2	1.75631	1	1	1	1	911	101.3	8.41
Q86TM6	E3 ubiquitin-protein ligase synoviolin OS=Homo sapiens GN=SYVN1 PE=1 SV=2	1.45867	1	1	1	1	617	67.6	6.95
P63167	Dynein light chain 1, cytoplasmic OS=Homo sapiens GN=DYNLL1 PE=1 SV=1	7.86517	1	1	1	1	89	10.4	7.4
Q15785	Mitochondrial import receptor subunit TOM34 OS=Homo sapiens GN=TOMM34 PE=1 SV=2	2.589	1	1	1	1	309	34.5	8.98
Q13601	KRR1 small subunit processome component homolog OS=Homo sapiens GN=KRR1 PE=1 SV=4	1.83727	1	1	1	1	381	43.6	9.77
Q9Y520	Isoform 7 of Protein PRRC2C OS=Homo sapiens GN=PRRC2C	0.552105	1	1	1	1	2898	316.9	9.13
P51843	Nuclear receptor subfamily 0 group B member 1 OS=Homo sapiens GN=NR0B1 PE=1 SV=2	9.3617	1	2	1	1	470	51.7	8.07
Q13336	Isoform 2 of Urea transporter 1 OS=Homo sapiens GN=SLC14A1	2.47191	1	1	1	1	445	48.3	6.54
Q5GLZ8	Isoform 4 of Probable E3 ubiquitin-protein ligase HERC4 OS=Homo sapiens GN=HERC4	29.0909	1	1	1	1	110	12	7.74
Q5SSJ5	Heterochromatin protein 1-binding protein 3 OS=Homo sapiens GN=HP1BP3 PE=1 SV=1	1.98915	1	1	1	1	553	61.2	9.67
Q8IYM0	Protein FAM186B OS=Homo sapiens GN=FAM186B PE=2 SV=2	0.895857	1	1	1	1	893	103.7	9.01
Q7Z4H3	HD domain-containing protein 2 OS=Homo sapiens GN=HDDC2 PE=1 SV=1	2.94118	1	1	1	1	204	23.4	5.49
Q8IV04	Carabin OS=Homo sapiens GN=TBC1D10C PE=1 SV=1	5.38117	1	1	1	1	446	49.7	8.76
Q5U5X0	Complex III assembly factor LYRM7 OS=Homo sapiens GN=LYRM7 PE=1 SV=1	16.3462	1	1	1	1	104	11.9	9.66
O76021	Ribosomal L1 domain-containing protein 1 OS=Homo sapiens GN=RSL1D1 PE=1 SV=3	4.08163	1	1	1	1	490	54.9	10.13
P15151	Poliovirus receptor OS=Homo sapiens GN=PVR PE=1 SV=2	1.43885	1	1	1	1	417	45.3	6.52
Q96I25	Splicing factor 45 OS=Homo sapiens GN=RBM17 PE=1 SV=1	10.9726	1	1	1	1	401	44.9	5.97
Q8N131	Porimin OS=Homo sapiens GN=TMEM123 PE=1 SV=1	4.32692	1	1	1	1	208	21.5	8.7
Q96RN5	Mediator of RNA polymerase II transcription subunit 15 OS=Homo sapiens GN=MED15 PE=1 SV=2	6.59898	1	1	1	1	788	86.7	9.42
Q9NQV5	PR domain-containing protein 11 OS=Homo sapiens GN=PRDM11 PE=1 SV=2	1.95695	1	1	1	1	511	57.8	6.18
Q16719	Kynureninase OS=Homo sapiens GN=KYNU PE=1 SV=1	1.29032	1	1	1	1	465	52.3	7.03
P08621	U1 small nuclear ribonucleoprotein 70 kDa OS=Homo sapiens GN=SNRNP70 PE=1 SV=2	2.0595	1	1	1	1	437	51.5	9.94
Q15833	Isoform 3 of Syntaxin-binding protein 2 OS=Homo sapiens GN=STXBP2	2.48344	1	1	1	1	604	67.7	6.68
P17096	High mobility group protein HMG-I/HMG-Y OS=Homo sapiens GN=HMGA1 PE=1 SV=3	17.757	1	1	1	1	107	11.7	10.32
Q9UF12	Probable proline dehydrogenase 2 OS=Homo sapiens GN=PRODH2 PE=2 SV=1	1.1194	1	1	1	1	536	58.8	8.6
Q8NE86	Calcium uniporter protein, mitochondrial OS=Homo sapiens GN=MCU PE=1 SV=1	2.849	1	1	1	1	351	39.8	8.65
Q13094	Lymphocyte cytosolic protein 2 OS=Homo sapiens GN=LCP2 PE=1 SV=1	8.44278	1	1	1	1	533	60.2	6.27
Q5VZ89	Isoform 2 of DENN domain-containing protein 4C OS=Homo sapiens GN=DENND4C	4.01396	1	1	1	1	1146	126.2	5.87
P33240	Cleavage stimulation factor subunit 2 OS=Homo sapiens GN=CSTF2 PE=1 SV=1	5.19931	1	1	1	1	577	60.9	6.83
Q9UJC3	Protein Hook homolog 1 OS=Homo sapiens GN=HOOK1 PE=1 SV=2	2.06044	1	1	1	1	728	84.6	5.15
Q9UKW6	ETS-related transcription factor Elf-5 OS=Homo sapiens GN=ELF5 PE=1 SV=2	3.01887	1	1	1	1	265	31.2	6.23
Q9BR39	Junctophilin-2 OS=Homo sapiens GN=JPH2 PE=1 SV=2	1.00575	1	1	1	1	696	74.2	8.72
P57735	Ras-related protein Rab-25 OS=Homo sapiens GN=RAB25 PE=1 SV=2	5.16432	1	1	1	1	213	23.5	5.96
Q05397	Isoform 5 of Focal adhesion kinase 1 OS=Homo sapiens GN=PTK2	0.657277	1	1	1	1	1065	120.8	6.74
Q96EY1	DnaJ homolog subfamily A member 3, mitochondrial OS=Homo sapiens GN=DNAJA3 PE=1 SV=2	2.5	1	1	1	1	480	52.5	9.26
Q8WWQ2	Inactive heparanase-2 OS=Homo sapiens GN=HPSE2 PE=1 SV=3	1.01351	1	1	1	1	592	66.6	9.94
Q5T4S7	Isoform 2 of E3 ubiquitin-protein ligase UBR4 OS=Homo sapiens GN=UBR4	0.134512	1	1	1	1	5204	575.6	6.01
Q8WWM7	Isoform 3 of Ataxin-2-like protein OS=Homo sapiens GN=ATXN2L	1.00273	1	1	1	1	1097	115.5	8.66
Q9NYF8	Bcl-2-associated transcription factor 1 OS=Homo sapiens GN=BCLAF1 PE=1 SV=2	0.978261	1	1	1	1	920	106.1	9.98
P43308	Translocon-associated protein subunit beta OS=Homo sapiens GN=SSR2 PE=1 SV=1	3.27869	1	1	1	1	183	20.1	8.35
Q9UL46	Proteasome activator complex subunit 2 OS=Homo sapiens GN=PSME2 PE=1 SV=4	3.76569	1	1	1	1	239	27.4	5.73
P35626	Beta-adrenergic receptor kinase 2 OS=Homo sapiens GN=ADRBK2 PE=1 SV=2	1.30814	1	1	1	1	688	79.7	7.62
O75093	Slit homolog 1 protein OS=Homo sapiens GN=SLIT1 PE=2 SV=4	0.586701	1	1	1	1	1534	167.8	6.57
Q92817	Envoplakin OS=Homo sapiens GN=EVPL PE=1 SV=3	0.590261	1	1	1	1	2033	231.5	6.96

## Sheet: MCF7
Accession	Description	Coverage	# Peptides	# PSMs	# Unique Peptides	# Protein Groups	# AAs	MW [kDa]	calc. pI
P35232	Prohibitin OS=Homo sapiens GN=PHB PE=1 SV=1	81.6176	16	24	16	1	272	29.8	5.76
P04792	Heat shock protein beta-1 OS=Homo sapiens GN=HSPB1 PE=1 SV=2	81.4634	12	18	12	1	205	22.8	6.4
Q9HCY8	Protein S100-A14 OS=Homo sapiens GN=S100A14 PE=1 SV=1	80.7692	7	8	7	1	104	11.7	5.24
P40926	Malate dehydrogenase, mitochondrial OS=Homo sapiens GN=MDH2 PE=1 SV=3	79.5858	20	34	20	1	338	35.5	8.68
P27797	Calreticulin OS=Homo sapiens GN=CALR PE=1 SV=1	75.06	24	52	24	1	417	48.1	4.44
P05787	Isoform 2 of Keratin, type II cytoskeletal 8 OS=Homo sapiens GN=KRT8	73.7769	39	68	32	1	511	56.6	5.43
Q06830	Peroxiredoxin-1 OS=Homo sapiens GN=PRDX1 PE=1 SV=1	73.3668	14	22	11	1	199	22.1	8.13
Q99623	Prohibitin-2 OS=Homo sapiens GN=PHB2 PE=1 SV=2	71.9064	21	25	21	1	299	33.3	9.83
P05783	Keratin, type I cytoskeletal 18 OS=Homo sapiens GN=KRT18 PE=1 SV=2	71.3953	29	57	28	1	430	48	5.45
P05387	60S acidic ribosomal protein P2 OS=Homo sapiens GN=RPLP2 PE=1 SV=1	69.5652	5	11	5	1	115	11.7	4.54
P23396	40S ribosomal protein S3 OS=Homo sapiens GN=RPS3 PE=1 SV=2	69.5473	15	15	15	1	243	26.7	9.66
P61604	10 kDa heat shock protein, mitochondrial OS=Homo sapiens GN=HSPE1 PE=1 SV=2	67.6471	9	12	9	1	102	10.9	8.92
P51149	Ras-related protein Rab-7a OS=Homo sapiens GN=RAB7A PE=1 SV=1	67.6329	12	14	12	1	207	23.5	6.7
P08727	Keratin, type I cytoskeletal 19 OS=Homo sapiens GN=KRT19 PE=1 SV=4	67.25	31	50	23	1	400	44.1	5.14
P07919	Cytochrome b-c1 complex subunit 6, mitochondrial OS=Homo sapiens GN=UQCRH PE=1 SV=2	67.033	4	8	4	1	91	10.7	4.44
P14854	Cytochrome c oxidase subunit 6B1 OS=Homo sapiens GN=COX6B1 PE=1 SV=2	66.2791	6	10	6	1	86	10.2	7.05
P04406	Glyceraldehyde-3-phosphate dehydrogenase OS=Homo sapiens GN=GAPDH PE=1 SV=3	66.2687	16	35	16	1	335	36	8.46
P14618	Pyruvate kinase PKM OS=Homo sapiens GN=PKM PE=1 SV=4	65.9134	30	46	30	1	531	57.9	7.84
P62937	Isoform 2 of Peptidyl-prolyl cis-trans isomerase A OS=Homo sapiens GN=PPIA	65.7143	6	7	1	1	105	11.4	7.9
P60709	Actin, cytoplasmic 1 OS=Homo sapiens GN=ACTB PE=1 SV=1	65.3333	17	35	8	1	375	41.7	5.48
P06576	ATP synthase subunit beta, mitochondrial OS=Homo sapiens GN=ATP5B PE=1 SV=3	65.2174	23	68	23	1	529	56.5	5.4
O75947	ATP synthase subunit d, mitochondrial OS=Homo sapiens GN=ATP5H PE=1 SV=3	65.2174	9	15	9	1	161	18.5	5.3
P13804	Electron transfer flavoprotein subunit alpha, mitochondrial OS=Homo sapiens GN=ETFA PE=1 SV=1	65.1652	15	21	15	1	333	35.1	8.38
Q9GZT3	SRA stem-loop-interacting RNA-binding protein, mitochondrial OS=Homo sapiens GN=SLIRP PE=1 SV=1	65.1376	7	11	7	1	109	12.3	10.24
Q96FQ6	Protein S100-A16 OS=Homo sapiens GN=S100A16 PE=1 SV=1	64.0777	6	11	6	1	103	11.8	6.79
P21796	Voltage-dependent anion-selective channel protein 1 OS=Homo sapiens GN=VDAC1 PE=1 SV=2	63.9576	13	17	12	1	283	30.8	8.54
P30101	Protein disulfide-isomerase A3 OS=Homo sapiens GN=PDIA3 PE=1 SV=4	63.3663	27	32	27	1	505	56.7	6.35
Q13162	Peroxiredoxin-4 OS=Homo sapiens GN=PRDX4 PE=1 SV=1	63.0996	12	16	10	1	271	30.5	6.29
P0DMV9	Heat shock 70 kDa protein 1B OS=Homo sapiens GN=HSPA1B PE=1 SV=1	63.0265	32	44	28	1	641	70	5.66
P10809	60 kDa heat shock protein, mitochondrial OS=Homo sapiens GN=HSPD1 PE=1 SV=2	62.3037	29	60	29	1	573	61	5.87
P32119	Peroxiredoxin-2 OS=Homo sapiens GN=PRDX2 PE=1 SV=5	61.1111	10	15	9	1	198	21.9	5.97
P04264	Keratin, type II cytoskeletal 1 OS=Homo sapiens GN=KRT1 PE=1 SV=6	60.559	34	48	27	1	644	66	8.12
P63104	14-3-3 protein zeta/delta OS=Homo sapiens GN=YWHAZ PE=1 SV=1	60.4082	13	15	10	1	245	27.7	4.79
P14927	Cytochrome b-c1 complex subunit 7 OS=Homo sapiens GN=UQCRB PE=1 SV=2	60.3604	7	8	7	1	111	13.5	8.78
P62249	40S ribosomal protein S16 OS=Homo sapiens GN=RPS16 PE=1 SV=2	60.274	10	10	10	1	146	16.4	10.21
P63241	Isoform 2 of Eukaryotic translation initiation factor 5A-1 OS=Homo sapiens GN=EIF5A	59.7826	10	14	10	1	184	20.2	7.01
P05388	60S acidic ribosomal protein P0 OS=Homo sapiens GN=RPLP0 PE=1 SV=1	59.6215	14	19	14	1	317	34.3	5.97
Q04837	Single-stranded DNA-binding protein, mitochondrial OS=Homo sapiens GN=SSBP1 PE=1 SV=1	59.4595	8	9	8	1	148	17.2	9.6
O43852	Isoform 3 of Calumenin OS=Homo sapiens GN=CALU	59.4427	13	17	2	1	323	38	4.63
P23528	Cofilin-1 OS=Homo sapiens GN=CFL1 PE=1 SV=3	59.0361	8	10	8	1	166	18.5	8.09
P63218	Guanine nucleotide-binding protein G(I)/G(S)/G(O) subunit gamma-5 OS=Homo sapiens GN=GNG5 PE=1 SV=3	58.8235	3	4	3	1	68	7.3	9.85
P60953	Cell division control protein 42 homolog OS=Homo sapiens GN=CDC42 PE=1 SV=2	58.6387	8	9	7	1	191	21.2	6.55
P13645	Keratin, type I cytoskeletal 10 OS=Homo sapiens GN=KRT10 PE=1 SV=6	58.3904	30	49	27	1	584	58.8	5.21
P00505	Aspartate aminotransferase, mitochondrial OS=Homo sapiens GN=GOT2 PE=1 SV=3	57.907	19	20	19	1	430	47.5	9.01
P07237	Protein disulfide-isomerase OS=Homo sapiens GN=P4HB PE=1 SV=3	57.2835	26	37	26	1	508	57.1	4.87
P80723	Brain acid soluble protein 1 OS=Homo sapiens GN=BASP1 PE=1 SV=2	57.2687	7	9	7	1	227	22.7	4.63
P11021	78 kDa glucose-regulated protein OS=Homo sapiens GN=HSPA5 PE=1 SV=2	57.1865	31	53	29	1	654	72.3	5.16
P06748	Nucleophosmin OS=Homo sapiens GN=NPM1 PE=1 SV=2	57.1429	12	26	12	1	294	32.6	4.78
P05386	60S acidic ribosomal protein P1 OS=Homo sapiens GN=RPLP1 PE=1 SV=1	57.0175	3	5	3	1	114	11.5	4.32
P22695	Cytochrome b-c1 complex subunit 2, mitochondrial OS=Homo sapiens GN=UQCRC2 PE=1 SV=3	56.7329	20	28	20	1	453	48.4	8.63
P49411	Elongation factor Tu, mitochondrial OS=Homo sapiens GN=TUFM PE=1 SV=2	56.6372	24	29	24	1	452	49.5	7.61
O00264	Membrane-associated progesterone receptor component 1 OS=Homo sapiens GN=PGRMC1 PE=1 SV=3	56.4103	7	9	6	1	195	21.7	4.7
P61106	Ras-related protein Rab-14 OS=Homo sapiens GN=RAB14 PE=1 SV=4	56.2791	8	15	7	1	215	23.9	6.21
P25705	ATP synthase subunit alpha, mitochondrial OS=Homo sapiens GN=ATP5A1 PE=1 SV=1	56.2387	29	52	29	1	553	59.7	9.13
P61224	Ras-related protein Rap-1b OS=Homo sapiens GN=RAP1B PE=1 SV=1	55.9783	8	8	7	1	184	20.8	5.78
Q99714	3-hydroxyacyl-CoA dehydrogenase type-2 OS=Homo sapiens GN=HSD17B10 PE=1 SV=3	55.9387	9	15	9	1	261	26.9	7.78
Q9UJZ1	Stomatin-like protein 2, mitochondrial OS=Homo sapiens GN=STOML2 PE=1 SV=1	55.8989	13	18	13	1	356	38.5	7.39
Q9H2U2	Isoform 2 of Inorganic pyrophosphatase 2, mitochondrial OS=Homo sapiens GN=PPA2	55.8739	15	19	14	1	349	39.6	6.92
P62081	40S ribosomal protein S7 OS=Homo sapiens GN=RPS7 PE=1 SV=1	55.6701	8	8	8	1	194	22.1	10.1
P14174	Macrophage migration inhibitory factor OS=Homo sapiens GN=MIF PE=1 SV=4	55.6522	2	2	2	1	115	12.5	7.88
P30040	Endoplasmic reticulum resident protein 29 OS=Homo sapiens GN=ERP29 PE=1 SV=4	55.1724	11	13	11	1	261	29	7.31
P38646	Stress-70 protein, mitochondrial OS=Homo sapiens GN=HSPA9 PE=1 SV=2	54.6392	31	51	31	1	679	73.6	6.16
P63244	Receptor of activated protein C kinase 1 OS=Homo sapiens GN=RACK1 PE=1 SV=3	54.5741	13	16	13	1	317	35.1	7.69
P27824	Isoform 2 of Calnexin OS=Homo sapiens GN=CANX	54.386	27	55	27	1	627	71.5	4.7
P62937	Peptidyl-prolyl cis-trans isomerase A OS=Homo sapiens GN=PPIA PE=1 SV=2	53.9394	8	10	2	1	165	18	7.81
P30050	60S ribosomal protein L12 OS=Homo sapiens GN=RPL12 PE=1 SV=1	53.9394	7	9	7	1	165	17.8	9.42
P62987	Ubiquitin-60S ribosomal protein L40 OS=Homo sapiens GN=UBA52 PE=1 SV=2	53.9062	8	12	8	1	128	14.7	9.83
P55072	Transitional endoplasmic reticulum ATPase OS=Homo sapiens GN=VCP PE=1 SV=4	53.8462	33	51	33	1	806	89.3	5.26
P08195	Isoform 4 of 4F2 cell-surface antigen heavy chain OS=Homo sapiens GN=SLC3A2	53.7065	32	67	32	1	661	71.1	4.97
O43852	Isoform 4 of Calumenin OS=Homo sapiens GN=CALU	53.2508	12	16	1	1	323	38.1	4.58
P62888	60S ribosomal protein L30 OS=Homo sapiens GN=RPL30 PE=1 SV=2	53.0435	5	6	5	1	115	12.8	9.63
O43707	Alpha-actinin-4 OS=Homo sapiens GN=ACTN4 PE=1 SV=2	53.0187	37	44	23	1	911	104.8	5.44
P61026	Ras-related protein Rab-10 OS=Homo sapiens GN=RAB10 PE=1 SV=1	53	10	13	7	1	200	22.5	8.38
P01111	GTPase NRas OS=Homo sapiens GN=NRAS PE=1 SV=1	52.9101	7	8	7	1	189	21.2	5.17
Q14061	Cytochrome c oxidase copper chaperone OS=Homo sapiens GN=COX17 PE=1 SV=2	52.381	3	3	3	1	63	6.9	7.24
P11413	Isoform Long of Glucose-6-phosphate 1-dehydrogenase OS=Homo sapiens GN=G6PD	52.0499	25	36	25	1	561	63.8	6.89
P20674	Cytochrome c oxidase subunit 5A, mitochondrial OS=Homo sapiens GN=COX5A PE=1 SV=2	52	7	10	7	1	150	16.8	6.79
P48735	Isocitrate dehydrogenase [NADP], mitochondrial OS=Homo sapiens GN=IDH2 PE=1 SV=2	51.9912	22	36	22	1	452	50.9	8.69
P61978	Isoform 2 of Heterogeneous nuclear ribonucleoprotein K OS=Homo sapiens GN=HNRNPK	51.9397	18	26	18	1	464	51	5.33
P13639	Elongation factor 2 OS=Homo sapiens GN=EEF2 PE=1 SV=4	51.7483	36	58	35	1	858	95.3	6.83
P68104	Elongation factor 1-alpha 1 OS=Homo sapiens GN=EEF1A1 PE=1 SV=1	51.5152	14	25	9	1	462	50.1	9.01
Q9NS69	Mitochondrial import receptor subunit TOM22 homolog OS=Homo sapiens GN=TOMM22 PE=1 SV=3	51.4085	5	8	5	1	142	15.5	4.34
P11142	Heat shock cognate 71 kDa protein OS=Homo sapiens GN=HSPA8 PE=1 SV=1	51.3932	27	38	22	1	646	70.9	5.52
P30084	Enoyl-CoA hydratase, mitochondrial OS=Homo sapiens GN=ECHS1 PE=1 SV=4	51.3793	14	21	14	1	290	31.4	8.07
Q9H0U4	Ras-related protein Rab-1B OS=Homo sapiens GN=RAB1B PE=1 SV=1	51.2438	9	14	3	1	201	22.2	5.73
P13667	Protein disulfide-isomerase A4 OS=Homo sapiens GN=PDIA4 PE=1 SV=2	51.0078	28	42	28	1	645	72.9	5.07
P61204	ADP-ribosylation factor 3 OS=Homo sapiens GN=ARF3 PE=1 SV=2	50.8287	8	10	7	1	181	20.6	7.43
P62805	Histone H4 OS=Homo sapiens GN=HIST1H4A PE=1 SV=2	50.4854	5	6	5	1	103	11.4	11.36
P07437	Tubulin beta chain OS=Homo sapiens GN=TUBB PE=1 SV=2	50.4505	16	22	4	1	444	49.6	4.89
P35908	Keratin, type II cytoskeletal 2 epidermal OS=Homo sapiens GN=KRT2 PE=1 SV=2	50.3912	26	32	18	1	639	65.4	8
P07355	Isoform 2 of Annexin A2 OS=Homo sapiens GN=ANXA2	50.1401	15	17	15	1	357	40.4	8.37
P18077	60S ribosomal protein L35a OS=Homo sapiens GN=RPL35A PE=1 SV=2	50	7	7	7	1	110	12.5	11.06
P49006	MARCKS-related protein OS=Homo sapiens GN=MARCKSL1 PE=1 SV=2	49.7436	4	4	4	1	195	19.5	4.67
P24539	ATP synthase F(0) complex subunit B1, mitochondrial OS=Homo sapiens GN=ATP5F1 PE=1 SV=2	49.6094	12	23	12	1	256	28.9	9.36
P04908	Histone H2A type 1-B/E OS=Homo sapiens GN=HIST1H2AB PE=1 SV=2	49.2308	4	6	4	1	130	14.1	11.05
O14745	Na(+)/H(+) exchange regulatory cofactor NHE-RF1 OS=Homo sapiens GN=SLC9A3R1 PE=1 SV=4	49.162	16	19	16	1	358	38.8	5.77
P35527	Keratin, type I cytoskeletal 9 OS=Homo sapiens GN=KRT9 PE=1 SV=3	49.1172	22	34	21	1	623	62	5.24
P34897	Serine hydroxymethyltransferase, mitochondrial OS=Homo sapiens GN=SHMT2 PE=1 SV=3	49.0079	18	25	18	1	504	56	8.53
P04075	Isoform 2 of Fructose-bisphosphate aldolase A OS=Homo sapiens GN=ALDOA	48.8038	19	25	15	1	418	45.2	8.25
P26599	Polypyrimidine tract-binding protein 1 OS=Homo sapiens GN=PTBP1 PE=1 SV=1	48.3992	16	21	16	1	531	57.2	9.17
Q15388	Mitochondrial import receptor subunit TOM20 homolog OS=Homo sapiens GN=TOMM20 PE=1 SV=1	48.2759	3	5	3	1	145	16.3	8.6
P67809	Nuclease-sensitive element-binding protein 1 OS=Homo sapiens GN=YBX1 PE=1 SV=3	48.1481	9	11	6	1	324	35.9	9.88
P08708	40S ribosomal protein S17 OS=Homo sapiens GN=RPS17 PE=1 SV=2	48.1481	4	7	4	1	135	15.5	9.85
P04843	Dolichyl-diphosphooligosaccharide--protein glycosyltransferase subunit 1 OS=Homo sapiens GN=RPN1 PE=1 SV=1	48.1054	22	28	22	1	607	68.5	6.38
P12532	Creatine kinase U-type, mitochondrial OS=Homo sapiens GN=CKMT1A PE=1 SV=1	47.9616	13	18	12	1	417	47	8.34
P62820	Ras-related protein Rab-1A OS=Homo sapiens GN=RAB1A PE=1 SV=3	47.8049	9	13	3	1	205	22.7	6.21
Q9HCC0	Methylcrotonoyl-CoA carboxylase beta chain, mitochondrial OS=Homo sapiens GN=MCCC2 PE=1 SV=1	47.7798	17	20	17	1	563	61.3	7.68
P09622	Dihydrolipoyl dehydrogenase, mitochondrial OS=Homo sapiens GN=DLD PE=1 SV=2	47.7407	18	26	18	1	509	54.1	7.85
P61019	Ras-related protein Rab-2A OS=Homo sapiens GN=RAB2A PE=1 SV=1	47.6415	9	10	9	1	212	23.5	6.54
Q9UBX3	Isoform 2 of Mitochondrial dicarboxylate carrier OS=Homo sapiens GN=SLC25A10	47.6351	10	11	10	1	296	32.1	9.35
P00338	Isoform 3 of L-lactate dehydrogenase A chain OS=Homo sapiens GN=LDHA	47.3684	14	16	14	1	361	39.8	8.43
Q9Y6C9	Mitochondrial carrier homolog 2 OS=Homo sapiens GN=MTCH2 PE=1 SV=1	47.1947	11	14	11	1	303	33.3	7.97
P00167	Cytochrome b5 OS=Homo sapiens GN=CYB5A PE=1 SV=2	47.0149	5	8	5	1	134	15.3	4.96
P62879	Guanine nucleotide-binding protein G(I)/G(S)/G(T) subunit beta-2 OS=Homo sapiens GN=GNB2 PE=1 SV=3	46.7647	12	18	6	1	340	37.3	6
P60174	Triosephosphate isomerase OS=Homo sapiens GN=TPI1 PE=1 SV=3	46.5035	9	10	9	1	286	30.8	5.92
O95716	Ras-related protein Rab-3D OS=Homo sapiens GN=RAB3D PE=1 SV=1	46.1187	9	12	7	1	219	24.3	4.93
Q07021	Complement component 1 Q subcomponent-binding protein, mitochondrial OS=Homo sapiens GN=C1QBP PE=1 SV=1	46.0993	7	14	7	1	282	31.3	4.84
P62269	40S ribosomal protein S18 OS=Homo sapiens GN=RPS18 PE=1 SV=3	46.0526	8	8	8	1	152	17.7	10.99
P62316	Small nuclear ribonucleoprotein Sm D2 OS=Homo sapiens GN=SNRPD2 PE=1 SV=1	45.7627	5	5	5	1	118	13.5	9.91
P42126	Enoyl-CoA delta isomerase 1, mitochondrial OS=Homo sapiens GN=ECI1 PE=1 SV=1	45.6954	8	9	8	1	302	32.8	8.54
P50454	Serpin H1 OS=Homo sapiens GN=SERPINH1 PE=1 SV=2	45.6938	14	20	14	1	418	46.4	8.69
P62241	40S ribosomal protein S8 OS=Homo sapiens GN=RPS8 PE=1 SV=2	45.6731	8	9	8	1	208	24.2	10.32
P61513	60S ribosomal protein L37a OS=Homo sapiens GN=RPL37A PE=1 SV=2	45.6522	5	5	5	1	92	10.3	10.43
P08133	Annexin A6 OS=Homo sapiens GN=ANXA6 PE=1 SV=3	45.4681	26	32	26	1	673	75.8	5.6
P52815	39S ribosomal protein L12, mitochondrial OS=Homo sapiens GN=MRPL12 PE=1 SV=2	45.4545	6	9	6	1	198	21.3	8.87
Q9HDC9	Adipocyte plasma membrane-associated protein OS=Homo sapiens GN=APMAP PE=1 SV=2	45.4327	14	19	14	1	416	46.5	6.16
Q9P0L0	Vesicle-associated membrane protein-associated protein A OS=Homo sapiens GN=VAPA PE=1 SV=3	45.3815	7	8	6	1	249	27.9	8.62
P31930	Cytochrome b-c1 complex subunit 1, mitochondrial OS=Homo sapiens GN=UQCRC1 PE=1 SV=3	45.2083	16	24	16	1	480	52.6	6.37
P30042	ES1 protein homolog, mitochondrial OS=Homo sapiens GN=C21orf33 PE=1 SV=3	45.1493	7	11	7	1	268	28.2	8.27
Q9BPW8	Protein NipSnap homolog 1 OS=Homo sapiens GN=NIPSNAP1 PE=1 SV=1	45.0704	7	10	7	1	284	33.3	9.31
P37802	Isoform 2 of Transgelin-2 OS=Homo sapiens GN=TAGLN2	45	8	11	8	1	220	24.4	8.25
P00403	Cytochrome c oxidase subunit 2 OS=Homo sapiens GN=MT-CO2 PE=1 SV=1	44.9339	6	11	6	1	227	25.5	4.82
P56385	ATP synthase subunit e, mitochondrial OS=Homo sapiens GN=ATP5I PE=1 SV=2	44.9275	3	4	3	1	69	7.9	9.35
P08574	Cytochrome c1, heme protein, mitochondrial OS=Homo sapiens GN=CYC1 PE=1 SV=3	44.9231	9	14	9	1	325	35.4	9
Q14697	Neutral alpha-glucosidase AB OS=Homo sapiens GN=GANAB PE=1 SV=3	44.9153	32	51	1	1	944	106.8	6.14
P14625	Endoplasmin OS=Homo sapiens GN=HSP90B1 PE=1 SV=1	44.8319	34	50	33	1	803	92.4	4.84
Q14697	Isoform 2 of Neutral alpha-glucosidase AB OS=Homo sapiens GN=GANAB	44.824	33	52	2	1	966	109.4	6.24
P40939	Trifunctional enzyme subunit alpha, mitochondrial OS=Homo sapiens GN=HADHA PE=1 SV=2	44.8231	23	29	23	1	763	82.9	9.04
Q02878	60S ribosomal protein L6 OS=Homo sapiens GN=RPL6 PE=1 SV=3	44.7917	14	17	14	1	288	32.7	10.58
P62424	60S ribosomal protein L7a OS=Homo sapiens GN=RPL7A PE=1 SV=2	44.7368	10	12	10	1	266	30	10.61
P51572	Isoform 2 of B-cell receptor-associated protein 31 OS=Homo sapiens GN=BCAP31	44.7284	12	16	12	1	313	34.7	7.84
O75390	Citrate synthase, mitochondrial OS=Homo sapiens GN=CS PE=1 SV=2	44.6352	13	19	13	1	466	51.7	8.32
P29401	Isoform 2 of Transketolase OS=Homo sapiens GN=TKT	44.374	25	32	25	1	631	68.8	7.52
P30405	Peptidyl-prolyl cis-trans isomerase F, mitochondrial OS=Homo sapiens GN=PPIF PE=1 SV=1	43.9614	5	5	4	1	207	22	9.38
Q96AB3	Isoform 2 of Isochorismatase domain-containing protein 2 OS=Homo sapiens GN=ISOC2	43.8914	6	11	6	1	221	24.1	7.77
P22392	Isoform 3 of Nucleoside diphosphate kinase B OS=Homo sapiens GN=NME2	43.8202	6	10	6	1	267	30.1	8.92
P36578	60S ribosomal protein L4 OS=Homo sapiens GN=RPL4 PE=1 SV=5	43.7939	17	20	17	1	427	47.7	11.06
P09382	Galectin-1 OS=Homo sapiens GN=LGALS1 PE=1 SV=2	43.7037	4	5	4	1	135	14.7	5.5
P62910	60S ribosomal protein L32 OS=Homo sapiens GN=RPL32 PE=1 SV=2	43.7037	6	7	6	1	135	15.9	11.33
P22626	Heterogeneous nuclear ribonucleoproteins A2/B1 OS=Homo sapiens GN=HNRNPA2B1 PE=1 SV=2	43.6261	13	18	11	1	353	37.4	8.95
P36542	ATP synthase subunit gamma, mitochondrial OS=Homo sapiens GN=ATP5C1 PE=1 SV=1	43.6242	11	16	11	1	298	33	9.22
P31151	Protein S100-A7 OS=Homo sapiens GN=S100A7 PE=1 SV=4	43.5644	3	3	3	1	101	11.5	6.77
Q96C01	Protein FAM136A OS=Homo sapiens GN=FAM136A PE=1 SV=1	43.4783	6	6	6	1	138	15.6	7.61
P22234	Multifunctional protein ADE2 OS=Homo sapiens GN=PAICS PE=1 SV=3	43.2941	11	14	11	1	425	47	7.23
P61313	60S ribosomal protein L15 OS=Homo sapiens GN=RPL15 PE=1 SV=2	43.1373	9	14	9	1	204	24.1	11.62
Q9Y5U8	Mitochondrial pyruvate carrier 1 OS=Homo sapiens GN=MPC1 PE=1 SV=1	43.1193	2	3	2	1	109	12.3	9.61
P23284	Peptidyl-prolyl cis-trans isomerase B OS=Homo sapiens GN=PPIB PE=1 SV=2	43.0556	10	13	10	1	216	23.7	9.41
P30048	Thioredoxin-dependent peroxide reductase, mitochondrial OS=Homo sapiens GN=PRDX3 PE=1 SV=3	42.9688	8	12	8	1	256	27.7	7.78
P31949	Protein S100-A11 OS=Homo sapiens GN=S100A11 PE=1 SV=2	42.8571	4	5	4	1	105	11.7	7.12
O75531	Barrier-to-autointegration factor OS=Homo sapiens GN=BANF1 PE=1 SV=1	42.6966	3	3	3	1	89	10.1	6.09
O96008	Mitochondrial import receptor subunit TOM40 homolog OS=Homo sapiens GN=TOMM40 PE=1 SV=1	42.6593	9	14	9	1	361	37.9	7.25
Q15738	Sterol-4-alpha-carboxylate 3-dehydrogenase, decarboxylating OS=Homo sapiens GN=NSDHL PE=1 SV=2	42.3592	10	14	10	1	373	41.9	8.06
Q8IXM3	39S ribosomal protein L41, mitochondrial OS=Homo sapiens GN=MRPL41 PE=1 SV=1	42.3358	3	5	3	1	137	15.4	9.57
P18859	Isoform 2 of ATP synthase-coupling factor 6, mitochondrial OS=Homo sapiens GN=ATP5J	42.2414	5	9	5	1	116	13.4	9.07
P42704	Leucine-rich PPR motif-containing protein, mitochondrial OS=Homo sapiens GN=LRPPRC PE=1 SV=3	41.8938	50	61	50	1	1394	157.8	6.13
Q9P0U1	Mitochondrial import receptor subunit TOM7 homolog OS=Homo sapiens GN=TOMM7 PE=1 SV=1	41.8182	2	2	2	1	55	6.2	10.29
P48047	ATP synthase subunit O, mitochondrial OS=Homo sapiens GN=ATP5O PE=1 SV=1	41.784	7	11	7	1	213	23.3	9.96
O95831	Apoptosis-inducing factor 1, mitochondrial OS=Homo sapiens GN=AIFM1 PE=1 SV=1	41.7618	20	24	20	1	613	66.9	8.95
P04844	Dolichyl-diphosphooligosaccharide--protein glycosyltransferase subunit 2 OS=Homo sapiens GN=RPN2 PE=1 SV=3	41.6799	18	27	18	1	631	69.2	5.69
Q00610	Clathrin heavy chain 1 OS=Homo sapiens GN=CLTC PE=1 SV=5	41.1343	50	63	50	1	1675	191.5	5.69
P45880	Isoform 1 of Voltage-dependent anion-selective channel protein 2 OS=Homo sapiens GN=VDAC2	41.1003	9	13	9	1	309	33.4	7.59
P30049	ATP synthase subunit delta, mitochondrial OS=Homo sapiens GN=ATP5D PE=1 SV=2	41.0714	4	6	4	1	168	17.5	5.49
P42765	3-ketoacyl-CoA thiolase, mitochondrial OS=Homo sapiens GN=ACAA2 PE=1 SV=2	41.0579	9	12	9	1	397	41.9	8.09
P31040	Succinate dehydrogenase [ubiquinone] flavoprotein subunit, mitochondrial OS=Homo sapiens GN=SDHA PE=1 SV=2	40.9639	17	25	17	1	664	72.6	7.39
P61586	Transforming protein RhoA OS=Homo sapiens GN=RHOA PE=1 SV=1	40.9326	7	7	6	1	193	21.8	6.1
Q05639	Elongation factor 1-alpha 2 OS=Homo sapiens GN=EEF1A2 PE=1 SV=1	40.8207	10	18	5	1	463	50.4	9.03
P46782	40S ribosomal protein S5 OS=Homo sapiens GN=RPS5 PE=1 SV=4	40.6863	7	7	7	1	204	22.9	9.72
P05141	ADP/ATP translocase 2 OS=Homo sapiens GN=SLC25A5 PE=1 SV=7	40.604	14	18	3	1	298	32.8	9.69
P68431	Histone H3.1 OS=Homo sapiens GN=HIST1H3A PE=1 SV=2	40.4412	4	6	4	1	136	15.4	11.12
Q12931	Heat shock protein 75 kDa, mitochondrial OS=Homo sapiens GN=TRAP1 PE=1 SV=3	40.3409	23	25	22	1	704	80.1	8.21
Q07955	Serine/arginine-rich splicing factor 1 OS=Homo sapiens GN=SRSF1 PE=1 SV=2	40.3226	8	10	8	1	248	27.7	10.36
Q9Y3E5	Peptidyl-tRNA hydrolase 2, mitochondrial OS=Homo sapiens GN=PTRH2 PE=1 SV=1	40.2235	5	7	5	1	179	19.2	8.73
P16435	NADPH--cytochrome P450 reductase OS=Homo sapiens GN=POR PE=1 SV=2	40.1773	20	27	20	1	677	76.6	5.58
P14923	Junction plakoglobin OS=Homo sapiens GN=JUP PE=1 SV=3	40.1342	19	21	16	1	745	81.7	6.14
P68363	Tubulin alpha-1B chain OS=Homo sapiens GN=TUBA1B PE=1 SV=1	40.133	14	22	14	1	451	50.1	5.06
Q9BSH4	Translational activator of cytochrome c oxidase 1 OS=Homo sapiens GN=TACO1 PE=1 SV=1	40.0673	7	10	7	1	297	32.5	8.13
Q96AG4	Leucine-rich repeat-containing protein 59 OS=Homo sapiens GN=LRRC59 PE=1 SV=1	40.0651	9	13	9	1	307	34.9	9.57
P07339	Cathepsin D OS=Homo sapiens GN=CTSD PE=1 SV=1	39.8058	13	23	13	1	412	44.5	6.54
P68371	Tubulin beta-4B chain OS=Homo sapiens GN=TUBB4B PE=1 SV=1	39.7753	13	17	1	1	445	49.8	4.89
P61247	40S ribosomal protein S3a OS=Homo sapiens GN=RPS3A PE=1 SV=2	39.7727	11	13	11	1	264	29.9	9.73
P62873	Guanine nucleotide-binding protein G(I)/G(S)/G(T) subunit beta-1 OS=Homo sapiens GN=GNB1 PE=1 SV=3	39.7059	11	15	5	1	340	37.4	6
P62258	14-3-3 protein epsilon OS=Homo sapiens GN=YWHAE PE=1 SV=1	39.6078	9	11	7	1	255	29.2	4.74
Q12907	Vesicular integral-membrane protein VIP36 OS=Homo sapiens GN=LMAN2 PE=1 SV=1	39.6067	9	9	9	1	356	40.2	6.95
Q9UJS0	Isoform 2 of Calcium-binding mitochondrial carrier protein Aralar2 OS=Homo sapiens GN=SLC25A13	39.497	17	25	17	1	676	74.3	8.62
P46779	60S ribosomal protein L28 OS=Homo sapiens GN=RPL28 PE=1 SV=3	39.4161	7	8	7	1	137	15.7	12.02
P51148	Isoform 2 of Ras-related protein Rab-5C OS=Homo sapiens GN=RAB5C	39.3574	8	11	5	1	249	27	8.66
P61981	14-3-3 protein gamma OS=Homo sapiens GN=YWHAG PE=1 SV=2	39.2713	7	10	5	1	247	28.3	4.89
P12236	ADP/ATP translocase 3 OS=Homo sapiens GN=SLC25A6 PE=1 SV=4	39.2617	13	14	1	1	298	32.8	9.74
Q9HAV7	GrpE protein homolog 1, mitochondrial OS=Homo sapiens GN=GRPEL1 PE=1 SV=2	39.1705	7	10	7	1	217	24.3	8.12
P62304	Small nuclear ribonucleoprotein E OS=Homo sapiens GN=SNRPE PE=1 SV=1	39.1304	2	2	2	1	92	10.8	9.44
P32969	60S ribosomal protein L9 OS=Homo sapiens GN=RPL9 PE=1 SV=1	39.0625	6	11	6	1	192	21.9	9.95
Q9H9B4	Sideroflexin-1 OS=Homo sapiens GN=SFXN1 PE=1 SV=4	38.8199	11	17	11	1	322	35.6	9.07
P08238	Heat shock protein HSP 90-beta OS=Homo sapiens GN=HSP90AB1 PE=1 SV=4	38.8122	24	30	14	1	724	83.2	5.03
Q16718	NADH dehydrogenase [ubiquinone] 1 alpha subcomplex subunit 5 OS=Homo sapiens GN=NDUFA5 PE=1 SV=3	38.7931	3	4	3	1	116	13.5	5.99
P30044	Peroxiredoxin-5, mitochondrial OS=Homo sapiens GN=PRDX5 PE=1 SV=4	38.785	6	9	6	1	214	22.1	8.7
P26885	Peptidyl-prolyl cis-trans isomerase FKBP2 OS=Homo sapiens GN=FKBP2 PE=1 SV=2	38.7324	3	4	3	1	142	15.6	9.13
P27635	60S ribosomal protein L10 OS=Homo sapiens GN=RPL10 PE=1 SV=4	38.3178	7	7	7	1	214	24.6	10.08
P18124	60S ribosomal protein L7 OS=Homo sapiens GN=RPL7 PE=1 SV=1	38.3065	9	11	9	1	248	29.2	10.65
P08865	40S ribosomal protein SA OS=Homo sapiens GN=RPSA PE=1 SV=4	38.3051	8	9	8	1	295	32.8	4.87
Q9UDW1	Cytochrome b-c1 complex subunit 9 OS=Homo sapiens GN=UQCR10 PE=1 SV=3	38.0952	2	2	2	1	63	7.3	9.47
P62750	60S ribosomal protein L23a OS=Homo sapiens GN=RPL23A PE=1 SV=1	37.8205	8	9	8	1	156	17.7	10.45
P06733	Alpha-enolase OS=Homo sapiens GN=ENO1 PE=1 SV=2	37.788	11	16	11	1	434	47.1	7.39
P37268	Squalene synthase OS=Homo sapiens GN=FDFT1 PE=1 SV=1	37.6499	10	12	10	1	417	48.1	6.54
Q6DD88	Atlastin-3 OS=Homo sapiens GN=ATL3 PE=1 SV=1	37.5231	13	14	13	1	541	60.5	5.66
P39656	Dolichyl-diphosphooligosaccharide--protein glycosyltransferase 48 kDa subunit OS=Homo sapiens GN=DDOST PE=1 SV=4	37.5	12	14	12	1	456	50.8	6.55
Q15084	Isoform 2 of Protein disulfide-isomerase A6 OS=Homo sapiens GN=PDIA6	37.3984	15	22	15	1	492	53.9	5.33
Q00325	Isoform B of Phosphate carrier protein, mitochondrial OS=Homo sapiens GN=SLC25A3	37.3961	12	14	12	1	361	39.9	9.36
P61006	Ras-related protein Rab-8A OS=Homo sapiens GN=RAB8A PE=1 SV=1	37.1981	7	9	4	1	207	23.7	9.07
P63000	Ras-related C3 botulinum toxin substrate 1 OS=Homo sapiens GN=RAC1 PE=1 SV=1	36.9792	5	5	4	1	192	21.4	8.5
P39023	60S ribosomal protein L3 OS=Homo sapiens GN=RPL3 PE=1 SV=2	36.9727	15	17	15	1	403	46.1	10.18
P46783	40S ribosomal protein S10 OS=Homo sapiens GN=RPS10 PE=1 SV=1	36.9697	6	7	6	1	165	18.9	10.15
P62701	40S ribosomal protein S4, X isoform OS=Homo sapiens GN=RPS4X PE=1 SV=2	36.8821	10	14	10	1	263	29.6	10.15
Q96HE7	ERO1-like protein alpha OS=Homo sapiens GN=ERO1A PE=1 SV=2	36.7521	10	12	10	1	468	54.4	5.68
P09651	Heterogeneous nuclear ribonucleoprotein A1 OS=Homo sapiens GN=HNRNPA1 PE=1 SV=5	36.5591	12	20	10	1	372	38.7	9.13
Q00765	Receptor expression-enhancing protein 5 OS=Homo sapiens GN=REEP5 PE=1 SV=3	36.5079	8	8	8	1	189	21.5	8.1
Q9Y676	28S ribosomal protein S18b, mitochondrial OS=Homo sapiens GN=MRPS18B PE=1 SV=1	36.4341	5	6	5	1	258	29.4	9.38
P62263	40S ribosomal protein S14 OS=Homo sapiens GN=RPS14 PE=1 SV=3	36.4238	4	5	4	1	151	16.3	10.05
O43169	Cytochrome b5 type B OS=Homo sapiens GN=CYB5B PE=1 SV=2	36.3014	2	4	2	1	146	16.3	4.97
P09429	High mobility group protein B1 OS=Homo sapiens GN=HMGB1 PE=1 SV=3	36.2791	7	10	7	1	215	24.9	5.74
P05023	Sodium/potassium-transporting ATPase subunit alpha-1 OS=Homo sapiens GN=ATP1A1 PE=1 SV=1	36.1681	34	42	34	1	1023	112.8	5.49
P47985	Cytochrome b-c1 complex subunit Rieske, mitochondrial OS=Homo sapiens GN=UQCRFS1 PE=1 SV=2	36.1314	7	9	7	1	274	29.6	8.32
P38117	Isoform 2 of Electron transfer flavoprotein subunit beta OS=Homo sapiens GN=ETFB	36.1272	12	15	12	1	346	37.4	7.17
Q15366	Isoform 2 of Poly(rC)-binding protein 2 OS=Homo sapiens GN=PCBP2	36.0656	9	10	6	1	366	38.6	6.79
P55327	Isoform 3 of Tumor protein D52 OS=Homo sapiens GN=TPD52	35.8871	4	5	4	1	248	26.4	6.34
Q02543	60S ribosomal protein L18a OS=Homo sapiens GN=RPL18A PE=1 SV=2	35.7955	7	8	7	1	176	20.7	10.71
Q9NQC3	Isoform 2 of Reticulon-4 OS=Homo sapiens GN=RTN4	35.6568	8	12	8	1	373	40.3	4.78
P46778	60S ribosomal protein L21 OS=Homo sapiens GN=RPL21 PE=1 SV=2	35.625	5	7	5	1	160	18.6	10.49
P61769	Beta-2-microglobulin OS=Homo sapiens GN=B2M PE=1 SV=1	35.2941	3	3	3	1	119	13.7	6.52
Q99798	Aconitate hydratase, mitochondrial OS=Homo sapiens GN=ACO2 PE=1 SV=2	35.2564	21	26	21	1	780	85.4	7.61
P16615	Sarcoplasmic/endoplasmic reticulum calcium ATPase 2 OS=Homo sapiens GN=ATP2A2 PE=1 SV=1	35.2207	31	36	25	1	1042	114.7	5.34
P04040	Catalase OS=Homo sapiens GN=CAT PE=1 SV=3	35.1044	14	17	14	1	527	59.7	7.39
O14548	Cytochrome c oxidase subunit 7A-related protein, mitochondrial OS=Homo sapiens GN=COX7A2L PE=1 SV=2	35.0877	2	3	2	1	114	12.6	9.42
P50991	T-complex protein 1 subunit delta OS=Homo sapiens GN=CCT4 PE=1 SV=4	35.0649	15	18	14	1	539	57.9	7.83
P55084	Trifunctional enzyme subunit beta, mitochondrial OS=Homo sapiens GN=HADHB PE=1 SV=3	35.0211	14	16	14	1	474	51.3	9.41
P05026	Sodium/potassium-transporting ATPase subunit beta-1 OS=Homo sapiens GN=ATP1B1 PE=1 SV=1	34.9835	8	10	8	1	303	35	8.53
O75964	ATP synthase subunit g, mitochondrial OS=Homo sapiens GN=ATP5L PE=1 SV=3	34.9515	4	4	4	1	103	11.4	9.64
Q16629	Serine/arginine-rich splicing factor 7 OS=Homo sapiens GN=SRSF7 PE=1 SV=1	34.8739	9	11	8	1	238	27.4	11.82
Q9P0S9	Transmembrane protein 14C OS=Homo sapiens GN=TMEM14C PE=1 SV=1	34.8214	2	3	2	1	112	11.6	9.88
Q9BSJ8	Isoform 2 of Extended synaptotagmin-1 OS=Homo sapiens GN=ESYT1	34.7397	26	31	25	1	1114	123.9	5.78
Q9Y5L4	Mitochondrial import inner membrane translocase subunit Tim13 OS=Homo sapiens GN=TIMM13 PE=1 SV=1	34.7368	3	4	3	1	95	10.5	8.18
Q9UBI6	Guanine nucleotide-binding protein G(I)/G(S)/G(O) subunit gamma-12 OS=Homo sapiens GN=GNG12 PE=1 SV=3	34.7222	2	2	2	1	72	8	8.97
P23434	Glycine cleavage system H protein, mitochondrial OS=Homo sapiens GN=GCSH PE=1 SV=2	34.6821	3	7	3	1	173	18.9	4.88
P49419	Isoform 2 of Alpha-aminoadipic semialdehyde dehydrogenase OS=Homo sapiens GN=ALDH7A1	34.4423	11	13	11	1	511	55.3	6.86
Q8NFU3	Isoform 4 of Thiosulfate sulfurtransferase/rhodanese-like domain-containing protein 1 OS=Homo sapiens GN=TSTD1	34.4262	1	1	1	1	122	13.2	7.14
O75396	Vesicle-trafficking protein SEC22b OS=Homo sapiens GN=SEC22B PE=1 SV=4	34.4186	6	6	6	1	215	24.6	6.92
Q9UQ80	Proliferation-associated protein 2G4 OS=Homo sapiens GN=PA2G4 PE=1 SV=3	34.264	12	13	12	1	394	43.8	6.55
P02786	Transferrin receptor protein 1 OS=Homo sapiens GN=TFRC PE=1 SV=2	34.0789	22	31	22	1	760	84.8	6.61
P53999	Activated RNA polymerase II transcriptional coactivator p15 OS=Homo sapiens GN=SUB1 PE=1 SV=3	33.8583	5	6	5	1	127	14.4	9.6
Q01105	Protein SET OS=Homo sapiens GN=SET PE=1 SV=3	33.7931	6	12	6	1	290	33.5	4.32
Q9Y6H1	Coiled-coil-helix-coiled-coil-helix domain-containing protein 2 OS=Homo sapiens GN=CHCHD2 PE=1 SV=1	33.7748	3	4	3	1	151	15.5	9.22
P14866	Heterogeneous nuclear ribonucleoprotein L OS=Homo sapiens GN=HNRNPL PE=1 SV=2	33.6163	12	18	12	1	589	64.1	8.22
P11177	Pyruvate dehydrogenase E1 component subunit beta, mitochondrial OS=Homo sapiens GN=PDHB PE=1 SV=3	33.4262	8	10	8	1	359	39.2	6.65
P62857	40S ribosomal protein S28 OS=Homo sapiens GN=RPS28 PE=1 SV=1	33.3333	2	2	2	1	69	7.8	10.7
P31946	14-3-3 protein beta/alpha OS=Homo sapiens GN=YWHAB PE=1 SV=3	33.3333	7	10	4	1	246	28.1	4.83
O60506	Heterogeneous nuclear ribonucleoprotein Q OS=Homo sapiens GN=SYNCRIP PE=1 SV=2	33.2263	14	14	10	1	623	69.6	8.59
P27144	Adenylate kinase 4, mitochondrial OS=Homo sapiens GN=AK4 PE=1 SV=1	33.1839	4	5	4	1	223	25.3	8.4
Q8NFV4	Protein ABHD11 OS=Homo sapiens GN=ABHD11 PE=1 SV=1	33.0159	7	11	7	1	315	34.7	9.48
P07954	Fumarate hydratase, mitochondrial OS=Homo sapiens GN=FH PE=1 SV=3	32.9412	14	15	14	1	510	54.6	8.76
P63173	60S ribosomal protein L38 OS=Homo sapiens GN=RPL38 PE=1 SV=2	32.8571	2	2	2	1	70	8.2	10.1
P14314	Glucosidase 2 subunit beta OS=Homo sapiens GN=PRKCSH PE=1 SV=2	32.7652	12	16	12	1	528	59.4	4.41
Q96GE9	Transmembrane protein 261 OS=Homo sapiens GN=TMEM261 PE=4 SV=1	32.7586	1	1	1	1	116	12.2	9.77
P11940	Polyadenylate-binding protein 1 OS=Homo sapiens GN=PABPC1 PE=1 SV=2	32.7044	16	18	16	1	636	70.6	9.5
Q99584	Protein S100-A13 OS=Homo sapiens GN=S100A13 PE=1 SV=1	32.6531	3	3	3	1	98	11.5	6.16
P20339	Ras-related protein Rab-5A OS=Homo sapiens GN=RAB5A PE=1 SV=2	32.5581	6	7	3	1	215	23.6	8.15
Q15185	Prostaglandin E synthase 3 OS=Homo sapiens GN=PTGES3 PE=1 SV=1	32.5	4	4	4	1	160	18.7	4.54
Q15363	Transmembrane emp24 domain-containing protein 2 OS=Homo sapiens GN=TMED2 PE=1 SV=1	32.3383	5	8	5	1	201	22.7	5.17
Q9BRX8	Redox-regulatory protein FAM213A OS=Homo sapiens GN=FAM213A PE=1 SV=3	32.3144	7	8	7	1	229	25.7	8.84
O60762	Dolichol-phosphate mannosyltransferase subunit 1 OS=Homo sapiens GN=DPM1 PE=1 SV=1	32.3077	6	7	6	1	260	29.6	9.57
P62136	Isoform 2 of Serine/threonine-protein phosphatase PP1-alpha catalytic subunit OS=Homo sapiens GN=PPP1CA	32.2581	7	11	2	1	341	38.6	6.62
Q96BM9	ADP-ribosylation factor-like protein 8A OS=Homo sapiens GN=ARL8A PE=1 SV=1	32.2581	5	7	1	1	186	21.4	7.77
Q9NVJ2	ADP-ribosylation factor-like protein 8B OS=Homo sapiens GN=ARL8B PE=1 SV=1	32.2581	5	7	1	1	186	21.5	8.43
Q9NP72	Ras-related protein Rab-18 OS=Homo sapiens GN=RAB18 PE=1 SV=1	32.0388	5	5	5	1	206	23	5.24
P00387	Isoform 3 of NADH-cytochrome b5 reductase 3 OS=Homo sapiens GN=CYB5R3	32.0359	7	9	7	1	334	38.2	6.9
Q9BV40	Vesicle-associated membrane protein 8 OS=Homo sapiens GN=VAMP8 PE=1 SV=1	32	3	3	3	1	100	11.4	7.34
P13073	Cytochrome c oxidase subunit 4 isoform 1, mitochondrial OS=Homo sapiens GN=COX4I1 PE=1 SV=1	31.9527	5	7	5	1	169	19.6	9.51
Q86SX6	Glutaredoxin-related protein 5, mitochondrial OS=Homo sapiens GN=GLRX5 PE=1 SV=2	31.8471	4	5	4	1	157	16.6	6.79
Q02978	Mitochondrial 2-oxoglutarate/malate carrier protein OS=Homo sapiens GN=SLC25A11 PE=1 SV=3	31.8471	9	9	9	1	314	34	9.91
P25398	40S ribosomal protein S12 OS=Homo sapiens GN=RPS12 PE=1 SV=3	31.8182	4	4	4	1	132	14.5	7.21
P49257	Protein ERGIC-53 OS=Homo sapiens GN=LMAN1 PE=1 SV=2	31.7647	11	13	11	1	510	57.5	6.77
P46776	60S ribosomal protein L27a OS=Homo sapiens GN=RPL27A PE=1 SV=2	31.7568	5	5	5	1	148	16.6	11
P62318	Small nuclear ribonucleoprotein Sm D3 OS=Homo sapiens GN=SNRPD3 PE=1 SV=1	31.746	3	4	3	1	126	13.9	10.32
Q9BXW7	Cat eye syndrome critical region protein 5 OS=Homo sapiens GN=CECR5 PE=1 SV=1	31.6785	7	8	7	1	423	46.3	8.13
P46777	60S ribosomal protein L5 OS=Homo sapiens GN=RPL5 PE=1 SV=3	31.6498	9	12	9	1	297	34.3	9.72
P52272	Heterogeneous nuclear ribonucleoprotein M OS=Homo sapiens GN=HNRNPM PE=1 SV=3	31.6438	22	23	22	1	730	77.5	8.7
Q9BWF3	RNA-binding protein 4 OS=Homo sapiens GN=RBM4 PE=1 SV=1	31.5934	4	4	4	1	364	40.3	7.08
Q99729	Isoform 3 of Heterogeneous nuclear ribonucleoprotein A/B OS=Homo sapiens GN=HNRNPAB	31.5789	7	7	6	1	285	30.6	7.91
P52597	Heterogeneous nuclear ribonucleoprotein F OS=Homo sapiens GN=HNRNPF PE=1 SV=3	31.5663	8	12	6	1	415	45.6	5.58
P49327	Fatty acid synthase OS=Homo sapiens GN=FASN PE=1 SV=3	31.4217	47	55	47	1	2511	273.3	6.44
Q00839	Heterogeneous nuclear ribonucleoprotein U OS=Homo sapiens GN=HNRNPU PE=1 SV=6	31.3939	19	21	19	1	825	90.5	6
Q07020	60S ribosomal protein L18 OS=Homo sapiens GN=RPL18 PE=1 SV=2	31.383	5	6	5	1	188	21.6	11.72
P50897	Palmitoyl-protein thioesterase 1 OS=Homo sapiens GN=PPT1 PE=1 SV=1	31.3725	5	6	5	1	306	34.2	6.52
O95292	Vesicle-associated membrane protein-associated protein B/C OS=Homo sapiens GN=VAPB PE=1 SV=3	31.2757	6	7	5	1	243	27.2	7.3
P62277	40S ribosomal protein S13 OS=Homo sapiens GN=RPS13 PE=1 SV=2	31.1258	5	6	5	1	151	17.2	10.54
Q9NR30	Nucleolar RNA helicase 2 OS=Homo sapiens GN=DDX21 PE=1 SV=5	31.0345	18	20	18	1	783	87.3	9.28
P36957	Dihydrolipoyllysine-residue succinyltransferase component of 2-oxoglutarate dehydrogenase complex, mitochondrial OS=Homo sapiens GN=DLST PE=1 SV=4	30.9051	8	10	8	1	453	48.7	8.95
P62140	Serine/threonine-protein phosphatase PP1-beta catalytic subunit OS=Homo sapiens GN=PPP1CB PE=1 SV=3	30.8869	6	9	1	1	327	37.2	6.19
Q5U5X0	Complex III assembly factor LYRM7 OS=Homo sapiens GN=LYRM7 PE=1 SV=1	30.7692	2	2	2	1	104	11.9	9.66
P46459	Vesicle-fusing ATPase OS=Homo sapiens GN=NSF PE=1 SV=3	30.6452	17	20	17	1	744	82.5	6.95
P35221	Catenin alpha-1 OS=Homo sapiens GN=CTNNA1 PE=1 SV=1	30.574	18	20	18	1	906	100	6.29
Q9Y3D9	28S ribosomal protein S23, mitochondrial OS=Homo sapiens GN=MRPS23 PE=1 SV=2	30.5263	5	5	5	1	190	21.8	8.9
P35268	60S ribosomal protein L22 OS=Homo sapiens GN=RPL22 PE=1 SV=2	30.4688	2	4	2	1	128	14.8	9.19
P21333	Filamin-A OS=Homo sapiens GN=FLNA PE=1 SV=4	30.4118	51	59	46	1	2647	280.6	6.06
Q9Y5J7	Mitochondrial import inner membrane translocase subunit Tim9 OS=Homo sapiens GN=TIMM9 PE=1 SV=1	30.3371	2	2	2	1	89	10.4	7.21
P60842	Eukaryotic initiation factor 4A-I OS=Homo sapiens GN=EIF4A1 PE=1 SV=1	30.2956	12	12	12	1	406	46.1	5.48
P54920	Alpha-soluble NSF attachment protein OS=Homo sapiens GN=NAPA PE=1 SV=3	30.1695	6	7	6	1	295	33.2	5.36
P19338	Nucleolin OS=Homo sapiens GN=NCL PE=1 SV=3	30.1408	21	25	21	1	710	76.6	4.7
P30519	Heme oxygenase 2 OS=Homo sapiens GN=HMOX2 PE=1 SV=2	30.0633	7	9	7	1	316	36	5.41
Q13185	Chromobox protein homolog 3 OS=Homo sapiens GN=CBX3 PE=1 SV=4	30.0546	4	6	4	1	183	20.8	5.33
P13284	Gamma-interferon-inducible lysosomal thiol reductase OS=Homo sapiens GN=IFI30 PE=1 SV=3	30	3	8	3	1	250	27.9	4.88
P21964	Catechol O-methyltransferase OS=Homo sapiens GN=COMT PE=1 SV=2	29.8893	4	5	4	1	271	30	5.47
Q96A26	Protein FAM162A OS=Homo sapiens GN=FAM162A PE=1 SV=2	29.8701	4	4	4	1	154	17.3	9.77
P53621	Coatomer subunit alpha OS=Homo sapiens GN=COPA PE=1 SV=2	29.4935	24	26	24	1	1224	138.3	7.66
P68032	Actin, alpha cardiac muscle 1 OS=Homo sapiens GN=ACTC1 PE=1 SV=1	29.443	10	21	1	1	377	42	5.39
P30086	Phosphatidylethanolamine-binding protein 1 OS=Homo sapiens GN=PEBP1 PE=1 SV=3	29.4118	3	3	3	1	187	21	7.53
P43304	Glycerol-3-phosphate dehydrogenase, mitochondrial OS=Homo sapiens GN=GPD2 PE=1 SV=3	29.2985	16	16	16	1	727	80.8	7.69
P00558	Phosphoglycerate kinase 1 OS=Homo sapiens GN=PGK1 PE=1 SV=3	29.2566	9	11	9	1	417	44.6	8.1
Q9Y2R5	28S ribosomal protein S17, mitochondrial OS=Homo sapiens GN=MRPS17 PE=1 SV=1	29.2308	2	2	2	1	130	14.5	9.85
P12235	ADP/ATP translocase 1 OS=Homo sapiens GN=SLC25A4 PE=1 SV=4	29.1946	10	11	1	1	298	33	9.76
P04181	Ornithine aminotransferase, mitochondrial OS=Homo sapiens GN=OAT PE=1 SV=1	29.1572	7	7	7	1	439	48.5	7.03
O15173	Isoform 2 of Membrane-associated progesterone receptor component 2 OS=Homo sapiens GN=PGRMC2	29.1498	5	6	4	1	247	26.2	5.31
Q15654	Thyroid receptor-interacting protein 6 OS=Homo sapiens GN=TRIP6 PE=1 SV=3	28.9916	6	6	6	1	476	50.3	7.37
P27348	14-3-3 protein theta OS=Homo sapiens GN=YWHAQ PE=1 SV=1	28.9796	7	9	4	1	245	27.7	4.78
P39019	40S ribosomal protein S19 OS=Homo sapiens GN=RPS19 PE=1 SV=2	28.9655	4	5	4	1	145	16.1	10.32
Q15006	ER membrane protein complex subunit 2 OS=Homo sapiens GN=EMC2 PE=1 SV=1	28.9562	5	7	5	1	297	34.8	6.57
O14579	Coatomer subunit epsilon OS=Homo sapiens GN=COPE PE=1 SV=3	28.8961	5	5	5	1	308	34.5	5.12
P54819	Adenylate kinase 2, mitochondrial OS=Homo sapiens GN=AK2 PE=1 SV=2	28.8703	5	5	5	1	239	26.5	7.81
P80404	4-aminobutyrate aminotransferase, mitochondrial OS=Homo sapiens GN=ABAT PE=1 SV=3	28.8	11	13	11	1	500	56.4	7.96
Q02338	D-beta-hydroxybutyrate dehydrogenase, mitochondrial OS=Homo sapiens GN=BDH1 PE=1 SV=3	28.5714	7	10	7	1	343	38.1	8.95
P15954	Cytochrome c oxidase subunit 7C, mitochondrial OS=Homo sapiens GN=COX7C PE=1 SV=1	28.5714	2	2	2	1	63	7.2	10.27
P42677	40S ribosomal protein S27 OS=Homo sapiens GN=RPS27 PE=1 SV=3	28.5714	2	2	2	1	84	9.5	9.45
Q14247	Src substrate cortactin OS=Homo sapiens GN=CTTN PE=1 SV=2	28.5455	15	17	15	1	550	61.5	5.4
Q8NBS9	Thioredoxin domain-containing protein 5 OS=Homo sapiens GN=TXNDC5 PE=1 SV=2	28.4722	9	12	9	1	432	47.6	5.97
Q8N4Q1	Isoform 2 of Mitochondrial intermembrane space import and assembly protein 40 OS=Homo sapiens GN=CHCHD4	28.3871	3	4	3	1	155	17.4	4.39
Q9Y3D6	Mitochondrial fission 1 protein OS=Homo sapiens GN=FIS1 PE=1 SV=2	28.2895	4	4	4	1	152	16.9	8.79
P28838	Cytosol aminopeptidase OS=Homo sapiens GN=LAP3 PE=1 SV=3	28.131	11	13	11	1	519	56.1	7.93
Q8NI22	Multiple coagulation factor deficiency protein 2 OS=Homo sapiens GN=MCFD2 PE=1 SV=1	28.0822	2	4	2	1	146	16.4	4.63
P40429	60S ribosomal protein L13a OS=Homo sapiens GN=RPL13A PE=1 SV=2	28.0788	7	8	7	1	203	23.6	10.93
P62917	60S ribosomal protein L8 OS=Homo sapiens GN=RPL8 PE=1 SV=2	28.0156	6	9	6	1	257	28	11.03
P07737	Profilin-1 OS=Homo sapiens GN=PFN1 PE=1 SV=2	27.8571	3	4	3	1	140	15	8.27
P62280	40S ribosomal protein S11 OS=Homo sapiens GN=RPS11 PE=1 SV=3	27.8481	5	5	5	1	158	18.4	10.3
P62314	Small nuclear ribonucleoprotein Sm D1 OS=Homo sapiens GN=SNRPD1 PE=1 SV=1	27.7311	2	4	2	1	119	13.3	11.56
P14406	Cytochrome c oxidase subunit 7A2, mitochondrial OS=Homo sapiens GN=COX7A2 PE=1 SV=1	27.7108	2	2	2	1	83	9.4	9.76
P53007	Tricarboxylate transport protein, mitochondrial OS=Homo sapiens GN=SLC25A1 PE=1 SV=2	27.6527	6	9	6	1	311	34	9.89
Q9BX68	Histidine triad nucleotide-binding protein 2, mitochondrial OS=Homo sapiens GN=HINT2 PE=1 SV=1	27.6074	3	3	3	1	163	17.2	9.16
P36776	Lon protease homolog, mitochondrial OS=Homo sapiens GN=LONP1 PE=1 SV=2	27.5287	15	20	15	1	959	106.4	6.39
Q15365	Poly(rC)-binding protein 1 OS=Homo sapiens GN=PCBP1 PE=1 SV=2	27.5281	7	7	4	1	356	37.5	7.09
Q7Z4W1	L-xylulose reductase OS=Homo sapiens GN=DCXR PE=1 SV=2	27.459	6	6	6	1	244	25.9	8.1
Q13263	Transcription intermediary factor 1-beta OS=Homo sapiens GN=TRIM28 PE=1 SV=5	27.4251	13	17	13	1	835	88.5	5.77
Q02818	Nucleobindin-1 OS=Homo sapiens GN=NUCB1 PE=1 SV=4	27.3319	9	9	9	1	461	53.8	5.25
O75489	NADH dehydrogenase [ubiquinone] iron-sulfur protein 3, mitochondrial OS=Homo sapiens GN=NDUFS3 PE=1 SV=1	27.2727	5	5	5	1	264	30.2	7.5
P51991	Heterogeneous nuclear ribonucleoprotein A3 OS=Homo sapiens GN=HNRNPA3 PE=1 SV=2	27.2487	9	13	8	1	378	39.6	9.01
Q13011	Delta(3,5)-Delta(2,4)-dienoyl-CoA isomerase, mitochondrial OS=Homo sapiens GN=ECH1 PE=1 SV=2	27.1341	8	10	8	1	328	35.8	8
P51858	Hepatoma-derived growth factor OS=Homo sapiens GN=HDGF PE=1 SV=1	27.0833	5	5	5	1	240	26.8	4.73
O96005	Cleft lip and palate transmembrane protein 1 OS=Homo sapiens GN=CLPTM1 PE=1 SV=1	27.0553	12	18	12	1	669	76	6.3
Q8NC51	Isoform 3 of Plasminogen activator inhibitor 1 RNA-binding protein OS=Homo sapiens GN=SERBP1	26.972	6	8	6	1	393	43.1	8.44
P15880	40S ribosomal protein S2 OS=Homo sapiens GN=RPS2 PE=1 SV=2	26.9625	8	11	8	1	293	31.3	10.24
P84090	Enhancer of rudimentary homolog OS=Homo sapiens GN=ERH PE=1 SV=1	26.9231	2	2	2	1	104	12.3	5.92
P61254	60S ribosomal protein L26 OS=Homo sapiens GN=RPL26 PE=1 SV=1	26.8966	6	6	2	1	145	17.2	10.55
Q9UNX3	60S ribosomal protein L26-like 1 OS=Homo sapiens GN=RPL26L1 PE=1 SV=1	26.8966	6	6	2	1	145	17.2	10.55
P17844	Probable ATP-dependent RNA helicase DDX5 OS=Homo sapiens GN=DDX5 PE=1 SV=1	26.873	12	15	8	1	614	69.1	8.92
Q9BS26	Endoplasmic reticulum resident protein 44 OS=Homo sapiens GN=ERP44 PE=1 SV=1	26.8473	7	9	7	1	406	46.9	5.26
Q86TS9	39S ribosomal protein L52, mitochondrial OS=Homo sapiens GN=MRPL52 PE=1 SV=2	26.8293	1	1	1	1	123	13.7	10.26
P07900	Isoform 2 of Heat shock protein HSP 90-alpha OS=Homo sapiens GN=HSP90AA1	26.815	20	27	11	1	854	98.1	5.16
Q9NR28	Diablo homolog, mitochondrial OS=Homo sapiens GN=DIABLO PE=1 SV=1	26.7782	4	4	4	1	239	27.1	5.9
P50213	Isocitrate dehydrogenase [NAD] subunit alpha, mitochondrial OS=Homo sapiens GN=IDH3A PE=1 SV=1	26.776	8	8	8	1	366	39.6	6.92
Q08211	ATP-dependent RNA helicase A OS=Homo sapiens GN=DHX9 PE=1 SV=4	26.7717	24	28	24	1	1270	140.9	6.84
O96000	NADH dehydrogenase [ubiquinone] 1 beta subcomplex subunit 10 OS=Homo sapiens GN=NDUFB10 PE=1 SV=3	26.7442	4	4	4	1	172	20.8	8.48
Q6IAA8	Ragulator complex protein LAMTOR1 OS=Homo sapiens GN=LAMTOR1 PE=1 SV=2	26.7081	2	2	2	1	161	17.7	5.15
P12074	Cytochrome c oxidase subunit 6A1, mitochondrial OS=Homo sapiens GN=COX6A1 PE=1 SV=4	26.6055	1	2	1	1	109	12.1	9.32
P62266	40S ribosomal protein S23 OS=Homo sapiens GN=RPS23 PE=1 SV=3	26.5734	2	3	2	1	143	15.8	10.49
P08754	Guanine nucleotide-binding protein G(k) subunit alpha OS=Homo sapiens GN=GNAI3 PE=1 SV=3	26.5537	7	8	6	1	354	40.5	5.69
P61020	Ras-related protein Rab-5B OS=Homo sapiens GN=RAB5B PE=1 SV=1	26.5116	5	6	2	1	215	23.7	8.13
O43768	Isoform 4 of Alpha-endosulfine OS=Homo sapiens GN=ENSA	26.4286	3	3	3	1	140	15.5	8.72
P62899	60S ribosomal protein L31 OS=Homo sapiens GN=RPL31 PE=1 SV=1	26.4	3	3	3	1	125	14.5	10.54
Q9HB71	Calcyclin-binding protein OS=Homo sapiens GN=CACYBP PE=1 SV=2	26.3158	5	5	5	1	228	26.2	8.25
Q8N4H5	Isoform 2 of Mitochondrial import receptor subunit TOM5 homolog OS=Homo sapiens GN=TOMM5	26.087	3	3	3	1	92	10	6.51
Q92665	28S ribosomal protein S31, mitochondrial OS=Homo sapiens GN=MRPS31 PE=1 SV=3	26.0759	7	10	7	1	395	45.3	9.29
Q7KZF4	Staphylococcal nuclease domain-containing protein 1 OS=Homo sapiens GN=SND1 PE=1 SV=1	25.9341	16	20	16	1	910	101.9	7.17
Q9NZ45	CDGSH iron-sulfur domain-containing protein 1 OS=Homo sapiens GN=CISD1 PE=1 SV=1	25.9259	2	5	2	1	108	12.2	9.09
P62826	GTP-binding nuclear protein Ran OS=Homo sapiens GN=RAN PE=1 SV=3	25.9259	5	5	5	1	216	24.4	7.49
O43399	Isoform 7 of Tumor protein D54 OS=Homo sapiens GN=TPD52L2	25.7642	4	6	4	1	229	24.8	6.42
Q09666	Neuroblast differentiation-associated protein AHNAK OS=Homo sapiens GN=AHNAK PE=1 SV=2	25.7555	38	42	38	1	5890	628.7	6.15
P62829	60S ribosomal protein L23 OS=Homo sapiens GN=RPL23 PE=1 SV=1	25.7143	3	4	3	1	140	14.9	10.51
Q9Y3U8	60S ribosomal protein L36 OS=Homo sapiens GN=RPL36 PE=1 SV=3	25.7143	3	3	3	1	105	12.2	11.59
O14828	Secretory carrier-associated membrane protein 3 OS=Homo sapiens GN=SCAMP3 PE=1 SV=3	25.6484	4	5	4	1	347	38.3	7.64
P49755	Transmembrane emp24 domain-containing protein 10 OS=Homo sapiens GN=TMED10 PE=1 SV=2	25.5708	6	8	6	1	219	25	7.44
P56134	ATP synthase subunit f, mitochondrial OS=Homo sapiens GN=ATP5J2 PE=1 SV=3	25.5319	2	2	2	1	94	10.9	9.67
P13010	X-ray repair cross-complementing protein 5 OS=Homo sapiens GN=XRCC5 PE=1 SV=3	25.2732	10	12	10	1	732	82.7	5.81
P20645	Cation-dependent mannose-6-phosphate receptor OS=Homo sapiens GN=M6PR PE=1 SV=1	25.2708	4	6	4	1	277	31	5.83
Q9Y4L1	Hypoxia up-regulated protein 1 OS=Homo sapiens GN=HYOU1 PE=1 SV=1	25.1251	20	28	20	1	999	111.3	5.22
P28072	Proteasome subunit beta type-6 OS=Homo sapiens GN=PSMB6 PE=1 SV=4	25.1046	3	4	3	1	239	25.3	4.92
Q9H9P8	L-2-hydroxyglutarate dehydrogenase, mitochondrial OS=Homo sapiens GN=L2HGDH PE=1 SV=3	25.054	9	11	9	1	463	50.3	8.15
O75506	Heat shock factor-binding protein 1 OS=Homo sapiens GN=HSBP1 PE=1 SV=1	25	1	1	1	1	76	8.5	4.36
P51659	Peroxisomal multifunctional enzyme type 2 OS=Homo sapiens GN=HSD17B4 PE=1 SV=3	25	12	13	12	1	736	79.6	8.84
Q8TBQ9	Protein kish-A OS=Homo sapiens GN=TMEM167A PE=1 SV=1	25	2	2	2	1	72	8.1	8.95
Q8N2U0	Transmembrane protein 256 OS=Homo sapiens GN=TMEM256 PE=3 SV=1	24.7788	1	1	1	1	113	11.7	8.94
Q6NUK1	Calcium-binding mitochondrial carrier protein SCaMC-1 OS=Homo sapiens GN=SLC25A24 PE=1 SV=2	24.7379	10	10	10	1	477	53.3	6.33
O00483	Cytochrome c oxidase subunit NDUFA4 OS=Homo sapiens GN=NDUFA4 PE=1 SV=1	24.6914	2	2	2	1	81	9.4	9.38
Q6P587	Isoform 3 of Acylpyruvase FAHD1, mitochondrial OS=Homo sapiens GN=FAHD1	24.5968	3	3	3	1	248	27.1	7.69
Q15758	Neutral amino acid transporter B(0) OS=Homo sapiens GN=SLC1A5 PE=1 SV=2	24.5841	9	13	9	1	541	56.6	5.48
P78371	T-complex protein 1 subunit beta OS=Homo sapiens GN=CCT2 PE=1 SV=4	24.486	11	12	11	1	535	57.5	6.46
Q14257	Isoform 2 of Reticulocalbin-2 OS=Homo sapiens GN=RCN2	24.4776	5	6	5	1	335	39.1	4.45
P13693	Translationally-controlled tumor protein OS=Homo sapiens GN=TPT1 PE=1 SV=1	24.4186	4	6	4	1	172	19.6	4.93
Q9Y5U9	Immediate early response 3-interacting protein 1 OS=Homo sapiens GN=IER3IP1 PE=1 SV=1	24.3902	1	2	1	1	82	9	8.22
Q96CS3	FAS-associated factor 2 OS=Homo sapiens GN=FAF2 PE=1 SV=2	24.2697	7	7	7	1	445	52.6	5.62
P83731	60S ribosomal protein L24 OS=Homo sapiens GN=RPL24 PE=1 SV=1	24.2038	4	4	4	1	157	17.8	11.25
P48444	Coatomer subunit delta OS=Homo sapiens GN=ARCN1 PE=1 SV=1	24.0705	9	9	9	1	511	57.2	6.21
P10606	Cytochrome c oxidase subunit 5B, mitochondrial OS=Homo sapiens GN=COX5B PE=1 SV=2	24.031	3	5	3	1	129	13.7	8.81
P62851	40S ribosomal protein S25 OS=Homo sapiens GN=RPS25 PE=1 SV=1	24	3	3	3	1	125	13.7	10.11
P43897	Elongation factor Ts, mitochondrial OS=Homo sapiens GN=TSFM PE=1 SV=2	24	7	10	7	1	325	35.4	8.38
Q9H3N1	Thioredoxin-related transmembrane protein 1 OS=Homo sapiens GN=TMX1 PE=1 SV=1	23.9286	8	10	8	1	280	31.8	4.98
P61923	Isoform 4 of Coatomer subunit zeta-1 OS=Homo sapiens GN=COPZ1	23.7838	4	5	4	1	185	21.1	4.88
P84103	Serine/arginine-rich splicing factor 3 OS=Homo sapiens GN=SRSF3 PE=1 SV=1	23.7805	4	4	3	1	164	19.3	11.65
P63010	Isoform 2 of AP-2 complex subunit beta OS=Homo sapiens GN=AP2B1	23.7645	11	15	6	1	951	105.6	5.34
O00148	ATP-dependent RNA helicase DDX39A OS=Homo sapiens GN=DDX39A PE=1 SV=2	23.6534	8	8	2	1	427	49.1	5.68
Q8WUY1	Protein THEM6 OS=Homo sapiens GN=THEM6 PE=1 SV=2	23.5577	5	8	5	1	208	23.9	9.55
P61353	60S ribosomal protein L27 OS=Homo sapiens GN=RPL27 PE=1 SV=2	23.5294	2	2	2	1	136	15.8	10.56
Q9P035	Very-long-chain (3R)-3-hydroxyacyl-CoA dehydratase 3 OS=Homo sapiens GN=HACD3 PE=1 SV=2	23.4807	6	7	6	1	362	43.1	8.94
Q13838	Isoform 2 of Spliceosome RNA helicase DDX39B OS=Homo sapiens GN=DDX39B	23.4763	8	9	2	1	443	50.6	5.88
P04179	Superoxide dismutase [Mn], mitochondrial OS=Homo sapiens GN=SOD2 PE=1 SV=2	23.4234	2	2	2	1	222	24.7	8.25
O75380	NADH dehydrogenase [ubiquinone] iron-sulfur protein 6, mitochondrial OS=Homo sapiens GN=NDUFS6 PE=1 SV=1	23.3871	2	2	2	1	124	13.7	8.28
P02533	Keratin, type I cytoskeletal 14 OS=Homo sapiens GN=KRT14 PE=1 SV=4	23.3051	12	13	4	1	472	51.5	5.16
P27449	V-type proton ATPase 16 kDa proteolipid subunit OS=Homo sapiens GN=ATP6V0C PE=1 SV=1	23.2258	1	1	1	1	155	15.7	8.44
O95070	Protein YIF1A OS=Homo sapiens GN=YIF1A PE=1 SV=2	23.2082	3	3	3	1	293	32	8.95
P26641	Isoform 2 of Elongation factor 1-gamma OS=Homo sapiens GN=EEF1G	23.2033	11	12	11	1	487	56.1	7.72
P46781	40S ribosomal protein S9 OS=Homo sapiens GN=RPS9 PE=1 SV=3	23.1959	5	5	5	1	194	22.6	10.65
O14949	Cytochrome b-c1 complex subunit 8 OS=Homo sapiens GN=UQCRQ PE=1 SV=4	23.1707	3	4	3	1	82	9.9	10.08
P61956	Small ubiquitin-related modifier 2 OS=Homo sapiens GN=SUMO2 PE=1 SV=3	23.1579	2	3	2	1	95	10.9	5.5
Q5QNW6	Isoform 2 of Histone H2B type 2-F OS=Homo sapiens GN=HIST2H2BF	23.1343	3	4	3	1	134	14.8	10.35
P62244	40S ribosomal protein S15a OS=Homo sapiens GN=RPS15A PE=1 SV=2	23.0769	4	4	4	1	130	14.8	10.13
P82650	28S ribosomal protein S22, mitochondrial OS=Homo sapiens GN=MRPS22 PE=1 SV=1	23.0556	6	6	6	1	360	41.3	7.9
Q9BVK6	Transmembrane emp24 domain-containing protein 9 OS=Homo sapiens GN=TMED9 PE=1 SV=2	22.9787	5	7	3	1	235	27.3	8.02
O00165	HCLS1-associated protein X-1 OS=Homo sapiens GN=HAX1 PE=1 SV=2	22.9391	3	3	3	1	279	31.6	4.92
P49368	T-complex protein 1 subunit gamma OS=Homo sapiens GN=CCT3 PE=1 SV=4	22.9358	8	8	8	1	545	60.5	6.49
Q16762	Thiosulfate sulfurtransferase OS=Homo sapiens GN=TST PE=1 SV=4	22.8956	5	6	5	1	297	33.4	7.25
P11586	C-1-tetrahydrofolate synthase, cytoplasmic OS=Homo sapiens GN=MTHFD1 PE=1 SV=3	22.8877	15	15	15	1	935	101.5	7.3
Q9Y678	Coatomer subunit gamma-1 OS=Homo sapiens GN=COPG1 PE=1 SV=1	22.8833	12	13	11	1	874	97.7	5.47
Q96K17	Transcription factor BTF3 homolog 4 OS=Homo sapiens GN=BTF3L4 PE=1 SV=1	22.7848	2	2	1	1	158	17.3	6.35
O43920	NADH dehydrogenase [ubiquinone] iron-sulfur protein 5 OS=Homo sapiens GN=NDUFS5 PE=1 SV=3	22.6415	2	2	2	1	106	12.5	9.14
P20340	Ras-related protein Rab-6A OS=Homo sapiens GN=RAB6A PE=1 SV=3	22.5962	5	8	4	1	208	23.6	5.54
P84095	Rho-related GTP-binding protein RhoG OS=Homo sapiens GN=RHOG PE=1 SV=1	22.5131	3	3	2	1	191	21.3	8.12
Q86UE4	Protein LYRIC OS=Homo sapiens GN=MTDH PE=1 SV=2	22.5086	9	11	9	1	582	63.8	9.32
P31943	Heterogeneous nuclear ribonucleoprotein H OS=Homo sapiens GN=HNRNPH1 PE=1 SV=4	22.4944	7	11	3	1	449	49.2	6.3
P23588	Eukaryotic translation initiation factor 4B OS=Homo sapiens GN=EIF4B PE=1 SV=2	22.4223	7	8	7	1	611	69.1	5.73
Q8NFQ8	Torsin-1A-interacting protein 2 OS=Homo sapiens GN=TOR1AIP2 PE=1 SV=1	22.3404	5	6	5	1	470	51.2	4.96
Q9H7Z7	Prostaglandin E synthase 2 OS=Homo sapiens GN=PTGES2 PE=1 SV=1	22.2812	5	6	5	1	377	41.9	9.16
P26440	Isovaleryl-CoA dehydrogenase, mitochondrial OS=Homo sapiens GN=IVD PE=1 SV=1	22.2222	6	7	6	1	423	46.3	8.19
P54709	Sodium/potassium-transporting ATPase subunit beta-3 OS=Homo sapiens GN=ATP1B3 PE=1 SV=1	22.2222	5	6	5	1	279	31.5	8.35
P24534	Elongation factor 1-beta OS=Homo sapiens GN=EEF1B2 PE=1 SV=3	22.2222	2	3	2	1	225	24.7	4.67
Q8WW59	SPRY domain-containing protein 4 OS=Homo sapiens GN=SPRYD4 PE=1 SV=2	22.2222	3	4	3	1	207	23.1	6.93
A1L0T0	Acetolactate synthase-like protein OS=Homo sapiens GN=ILVBL PE=1 SV=2	22.1519	7	10	7	1	632	67.8	8.15
P49458	Signal recognition particle 9 kDa protein OS=Homo sapiens GN=SRP9 PE=1 SV=2	22.093	2	2	2	1	86	10.1	7.97
P19404	NADH dehydrogenase [ubiquinone] flavoprotein 2, mitochondrial OS=Homo sapiens GN=NDUFV2 PE=1 SV=2	22.0884	5	5	5	1	249	27.4	8.06
Q8TC12	Retinol dehydrogenase 11 OS=Homo sapiens GN=RDH11 PE=1 SV=2	22.0126	4	4	4	1	318	35.4	8.82
P09758	Tumor-associated calcium signal transducer 2 OS=Homo sapiens GN=TACSTD2 PE=1 SV=3	21.9814	4	4	4	1	323	35.7	8.87
O43504	Ragulator complex protein LAMTOR5 OS=Homo sapiens GN=LAMTOR5 PE=1 SV=1	21.978	1	1	1	1	91	9.6	4.87
Q14108	Lysosome membrane protein 2 OS=Homo sapiens GN=SCARB2 PE=1 SV=2	21.9665	6	8	6	1	478	54.3	5.14
Q9NYU2	UDP-glucose:glycoprotein glucosyltransferase 1 OS=Homo sapiens GN=UGGT1 PE=1 SV=3	21.9293	19	26	19	1	1555	177.1	5.63
Q16891	MICOS complex subunit MIC60 OS=Homo sapiens GN=IMMT PE=1 SV=1	21.8997	10	13	10	1	758	83.6	6.48
O75844	CAAX prenyl protease 1 homolog OS=Homo sapiens GN=ZMPSTE24 PE=1 SV=2	21.8947	7	8	7	1	475	54.8	7.49
O15270	Serine palmitoyltransferase 2 OS=Homo sapiens GN=SPTLC2 PE=1 SV=1	21.8861	9	9	9	1	562	62.9	7.78
P60468	Protein transport protein Sec61 subunit beta OS=Homo sapiens GN=SEC61B PE=1 SV=2	21.875	2	2	2	1	96	10	11.56
P50914	60S ribosomal protein L14 OS=Homo sapiens GN=RPL14 PE=1 SV=4	21.8605	5	6	5	1	215	23.4	10.93
Q96I99	Succinate--CoA ligase [GDP-forming] subunit beta, mitochondrial OS=Homo sapiens GN=SUCLG2 PE=1 SV=2	21.7593	7	8	7	1	432	46.5	6.39
Q9BUR5	MICOS complex subunit MIC26 OS=Homo sapiens GN=APOO PE=1 SV=1	21.7172	3	4	3	1	198	22.3	9.13
P83916	Chromobox protein homolog 1 OS=Homo sapiens GN=CBX1 PE=1 SV=1	21.6216	2	2	2	1	185	21.4	4.93
Q08380	Galectin-3-binding protein OS=Homo sapiens GN=LGALS3BP PE=1 SV=1	21.5385	11	13	11	1	585	65.3	5.27
P09110	3-ketoacyl-CoA thiolase, peroxisomal OS=Homo sapiens GN=ACAA1 PE=1 SV=2	21.4623	5	8	5	1	424	44.3	8.44
Q07065	Cytoskeleton-associated protein 4 OS=Homo sapiens GN=CKAP4 PE=1 SV=2	21.4286	10	12	10	1	602	66	5.92
O14957	Cytochrome b-c1 complex subunit 10 OS=Homo sapiens GN=UQCR11 PE=3 SV=1	21.4286	1	1	1	1	56	6.6	9.88
P10515	Dihydrolipoyllysine-residue acetyltransferase component of pyruvate dehydrogenase complex, mitochondrial OS=Homo sapiens GN=DLAT PE=1 SV=3	21.3292	10	12	10	1	647	69	7.84
Q9Y394	Dehydrogenase/reductase SDR family member 7 OS=Homo sapiens GN=DHRS7 PE=1 SV=1	21.2389	4	4	4	1	339	38.3	8.32
O43678	NADH dehydrogenase [ubiquinone] 1 alpha subcomplex subunit 2 OS=Homo sapiens GN=NDUFA2 PE=1 SV=3	21.2121	1	3	1	1	99	10.9	9.57
O43570	Carbonic anhydrase 12 OS=Homo sapiens GN=CA12 PE=1 SV=1	21.1864	4	5	4	1	354	39.4	7.23
O14561	Acyl carrier protein, mitochondrial OS=Homo sapiens GN=NDUFAB1 PE=1 SV=3	21.1538	4	7	4	1	156	17.4	4.93
Q9UIJ7	GTP:AMP phosphotransferase AK3, mitochondrial OS=Homo sapiens GN=AK3 PE=1 SV=4	21.1454	4	4	4	1	227	25.6	9.16
Q04917	14-3-3 protein eta OS=Homo sapiens GN=YWHAH PE=1 SV=4	21.1382	4	6	2	1	246	28.2	4.84
P10599	Thioredoxin OS=Homo sapiens GN=TXN PE=1 SV=3	20.9524	2	2	2	1	105	11.7	4.92
P51970	NADH dehydrogenase [ubiquinone] 1 alpha subcomplex subunit 8 OS=Homo sapiens GN=NDUFA8 PE=1 SV=3	20.9302	3	4	3	1	172	20.1	7.65
Q13740	CD166 antigen OS=Homo sapiens GN=ALCAM PE=1 SV=2	20.9262	8	8	8	1	583	65.1	6.25
Q15165	Serum paraoxonase/arylesterase 2 OS=Homo sapiens GN=PON2 PE=1 SV=3	20.904	4	5	4	1	354	39.4	5.6
P30043	Flavin reductase (NADPH) OS=Homo sapiens GN=BLVRB PE=1 SV=3	20.8738	3	4	3	1	206	22.1	7.65
P62854	40S ribosomal protein S26 OS=Homo sapiens GN=RPS26 PE=1 SV=3	20.8696	2	2	2	1	115	13	11
O15260	Surfeit locus protein 4 OS=Homo sapiens GN=SURF4 PE=1 SV=3	20.8178	5	6	5	1	269	30.4	7.78
Q8WV74	Nucleoside diphosphate-linked moiety X motif 8 OS=Homo sapiens GN=NUDT8 PE=1 SV=2	20.7627	1	1	1	1	236	25.4	8.41
P16422	Epithelial cell adhesion molecule OS=Homo sapiens GN=EPCAM PE=1 SV=2	20.7006	5	9	5	1	314	34.9	7.46
P63027	Vesicle-associated membrane protein 2 OS=Homo sapiens GN=VAMP2 PE=1 SV=3	20.6897	2	2	2	1	116	12.7	8.13
Q16576	Isoform 2 of Histone-binding protein RBBP7 OS=Homo sapiens GN=RBBP7	20.6823	5	5	5	1	469	52.3	5.27
Q9Y6M9	NADH dehydrogenase [ubiquinone] 1 beta subcomplex subunit 9 OS=Homo sapiens GN=NDUFB9 PE=1 SV=3	20.6704	3	3	3	1	179	21.8	8.38
Q13151	Heterogeneous nuclear ribonucleoprotein A0 OS=Homo sapiens GN=HNRNPA0 PE=1 SV=1	20.6557	5	7	4	1	305	30.8	9.29
P43307	Translocon-associated protein subunit alpha OS=Homo sapiens GN=SSR1 PE=1 SV=3	20.6294	3	5	3	1	286	32.2	4.49
P50416	Carnitine O-palmitoyltransferase 1, liver isoform OS=Homo sapiens GN=CPT1A PE=1 SV=2	20.5692	13	15	13	1	773	88.3	8.65
Q9NSE4	Isoleucine--tRNA ligase, mitochondrial OS=Homo sapiens GN=IARS2 PE=1 SV=2	20.5534	13	14	13	1	1012	113.7	7.2
Q12846	Syntaxin-4 OS=Homo sapiens GN=STX4 PE=1 SV=2	20.5387	4	4	4	1	297	34.2	6.28
P61421	V-type proton ATPase subunit d 1 OS=Homo sapiens GN=ATP6V0D1 PE=1 SV=1	20.5128	4	5	4	1	351	40.3	5
P49207	60S ribosomal protein L34 OS=Homo sapiens GN=RPL34 PE=1 SV=3	20.5128	3	3	3	1	117	13.3	11.47
O95202	LETM1 and EF-hand domain-containing protein 1, mitochondrial OS=Homo sapiens GN=LETM1 PE=1 SV=1	20.433	9	11	9	1	739	83.3	6.7
P84098	60S ribosomal protein L19 OS=Homo sapiens GN=RPL19 PE=1 SV=1	20.4082	4	5	4	1	196	23.5	11.47
P12004	Proliferating cell nuclear antigen OS=Homo sapiens GN=PCNA PE=1 SV=1	20.3065	5	5	5	1	261	28.8	4.69
P80303	Nucleobindin-2 OS=Homo sapiens GN=NUCB2 PE=1 SV=2	20.2381	4	5	4	1	420	50.2	5.12
Q969H8	Myeloid-derived growth factor OS=Homo sapiens GN=MYDGF PE=1 SV=1	20.2312	3	4	3	1	173	18.8	6.68
P63167	Dynein light chain 1, cytoplasmic OS=Homo sapiens GN=DYNLL1 PE=1 SV=1	20.2247	2	2	2	1	89	10.4	7.4
Q96QR8	Transcriptional activator protein Pur-beta OS=Homo sapiens GN=PURB PE=1 SV=3	20.1923	2	2	2	1	312	33.2	5.43
Q9Y333	U6 snRNA-associated Sm-like protein LSm2 OS=Homo sapiens GN=LSM2 PE=1 SV=1	20	1	1	1	1	95	10.8	6.52
P99999	Cytochrome c OS=Homo sapiens GN=CYCS PE=1 SV=2	20	2	2	2	1	105	11.7	9.57
P48449	Lanosterol synthase OS=Homo sapiens GN=LSS PE=1 SV=1	19.9454	12	13	12	1	732	83.3	6.61
P08559	Isoform 4 of Pyruvate dehydrogenase E1 component subunit alpha, somatic form, mitochondrial OS=Homo sapiens GN=PDHA1	19.8598	5	5	5	1	428	47.5	8.54
Q02218	2-oxoglutarate dehydrogenase, mitochondrial OS=Homo sapiens GN=OGDH PE=1 SV=3	19.8436	15	16	15	1	1023	115.9	6.86
Q9Y2B0	Protein canopy homolog 2 OS=Homo sapiens GN=CNPY2 PE=1 SV=1	19.7802	3	4	3	1	182	20.6	4.92
O00767	Acyl-CoA desaturase OS=Homo sapiens GN=SCD PE=1 SV=2	19.7772	6	8	6	1	359	41.5	9
Q3ZCQ8	Isoform 2 of Mitochondrial import inner membrane translocase subunit TIM50 OS=Homo sapiens GN=TIMM50	19.7368	7	10	7	1	456	50.4	9.42
Q15907	Ras-related protein Rab-11B OS=Homo sapiens GN=RAB11B PE=1 SV=4	19.7248	5	5	4	1	218	24.5	5.94
Q16563	Synaptophysin-like protein 1 OS=Homo sapiens GN=SYPL1 PE=1 SV=1	19.6911	3	5	3	1	259	28.5	8.43
Q6P5R6	60S ribosomal protein L22-like 1 OS=Homo sapiens GN=RPL22L1 PE=1 SV=2	19.6721	1	1	1	1	122	14.6	9.38
P13647	Keratin, type II cytoskeletal 5 OS=Homo sapiens GN=KRT5 PE=1 SV=3	19.661	14	16	5	1	590	62.3	7.74
Q8N5N7	39S ribosomal protein L50, mitochondrial OS=Homo sapiens GN=MRPL50 PE=1 SV=2	19.6203	2	2	2	1	158	18.3	7.88
P62891	60S ribosomal protein L39 OS=Homo sapiens GN=RPL39 PE=1 SV=2	19.6078	1	2	1	1	51	6.4	12.56
Q12906	Isoform 7 of Interleukin enhancer-binding factor 3 OS=Homo sapiens GN=ILF3	19.5991	13	15	13	1	898	95.7	8.81
Q96EK6	Glucosamine 6-phosphate N-acetyltransferase OS=Homo sapiens GN=GNPNAT1 PE=1 SV=1	19.5652	1	1	1	1	184	20.7	7.99
Q16822	Phosphoenolpyruvate carboxykinase [GTP], mitochondrial OS=Homo sapiens GN=PCK2 PE=1 SV=3	19.5312	8	8	8	1	640	70.7	7.62
Q92688	Acidic leucine-rich nuclear phosphoprotein 32 family member B OS=Homo sapiens GN=ANP32B PE=1 SV=1	19.5219	4	5	4	1	251	28.8	4.06
P61803	Dolichyl-diphosphooligosaccharide--protein glycosyltransferase subunit DAD1 OS=Homo sapiens GN=DAD1 PE=1 SV=3	19.469	2	2	2	1	113	12.5	7.08
Q4VC31	Coiled-coil domain-containing protein 58 OS=Homo sapiens GN=CCDC58 PE=1 SV=1	19.4444	3	3	3	1	144	16.6	7.81
Q99417	C-Myc-binding protein OS=Homo sapiens GN=MYCBP PE=1 SV=3	19.4175	1	1	1	1	103	12	5.91
Q96HS1	Serine/threonine-protein phosphatase PGAM5, mitochondrial OS=Homo sapiens GN=PGAM5 PE=1 SV=2	19.3772	4	4	4	1	289	32	8.68
Q9UBM7	7-dehydrocholesterol reductase OS=Homo sapiens GN=DHCR7 PE=1 SV=1	19.3684	9	14	9	1	475	54.5	8.7
P22830	Isoform 2 of Ferrochelatase, mitochondrial OS=Homo sapiens GN=FECH	19.3473	6	6	6	1	429	48.6	8.72
P05556	Integrin beta-1 OS=Homo sapiens GN=ITGB1 PE=1 SV=2	19.2982	12	14	12	1	798	88.4	5.39
P63220	40S ribosomal protein S21 OS=Homo sapiens GN=RPS21 PE=1 SV=1	19.2771	2	2	2	1	83	9.1	8.5
P43243	Matrin-3 OS=Homo sapiens GN=MATR3 PE=1 SV=2	19.2444	12	14	12	1	847	94.6	6.25
Q99832	T-complex protein 1 subunit eta OS=Homo sapiens GN=CCT7 PE=1 SV=2	19.1529	8	9	8	1	543	59.3	7.65
Q01650	Large neutral amino acids transporter small subunit 1 OS=Homo sapiens GN=SLC7A5 PE=1 SV=2	19.1321	9	13	9	1	507	55	7.72
B2RXH8	Heterogeneous nuclear ribonucleoprotein C-like 2 OS=Homo sapiens GN=HNRNPCL2 PE=2 SV=1	19.1126	7	8	1	1	293	32.1	5.44
Q96DB5	Regulator of microtubule dynamics protein 1 OS=Homo sapiens GN=RMDN1 PE=1 SV=1	19.1083	4	4	4	1	314	35.8	8.5
Q9Y2R9	28S ribosomal protein S7, mitochondrial OS=Homo sapiens GN=MRPS7 PE=1 SV=2	19.0083	4	4	4	1	242	28.1	9.99
P16402	Histone H1.3 OS=Homo sapiens GN=HIST1H1D PE=1 SV=2	19.0045	5	6	4	1	221	22.3	11.02
Q9Y3D3	28S ribosomal protein S16, mitochondrial OS=Homo sapiens GN=MRPS16 PE=1 SV=1	18.9781	2	2	2	1	137	15.3	9.5
P07108	Isoform 5 of Acyl-CoA-binding protein OS=Homo sapiens GN=DBI	18.9189	2	2	2	1	148	16.5	9.38
Q96B49	Mitochondrial import receptor subunit TOM6 homolog OS=Homo sapiens GN=TOMM6 PE=1 SV=1	18.9189	1	1	1	1	74	8	4.89
P62753	40S ribosomal protein S6 OS=Homo sapiens GN=RPS6 PE=1 SV=1	18.8755	5	7	5	1	249	28.7	10.84
P46977	Dolichyl-diphosphooligosaccharide--protein glycosyltransferase subunit STT3A OS=Homo sapiens GN=STT3A PE=1 SV=2	18.8652	13	14	13	1	705	80.5	8.07
P12814	Isoform 4 of Alpha-actinin-1 OS=Homo sapiens GN=ACTN1	18.8172	16	18	2	1	930	107.1	5.58
Q9Y4P3	Transducin beta-like protein 2 OS=Homo sapiens GN=TBL2 PE=1 SV=1	18.7919	7	8	7	1	447	49.8	9.44
Q01081	Splicing factor U2AF 35 kDa subunit OS=Homo sapiens GN=U2AF1 PE=1 SV=3	18.75	3	3	3	1	240	27.9	8.81
Q5ZPR3	CD276 antigen OS=Homo sapiens GN=CD276 PE=1 SV=1	18.7266	4	5	4	1	534	57.2	4.91
P35613	Basigin OS=Homo sapiens GN=BSG PE=1 SV=2	18.7013	4	5	4	1	385	42.2	5.66
P42766	60S ribosomal protein L35 OS=Homo sapiens GN=RPL35 PE=1 SV=2	18.6992	2	2	2	1	123	14.5	11.05
P09669	Cytochrome c oxidase subunit 6C OS=Homo sapiens GN=COX6C PE=1 SV=2	18.6667	2	2	2	1	75	8.8	10.39
Q92841	Probable ATP-dependent RNA helicase DDX17 OS=Homo sapiens GN=DDX17 PE=1 SV=2	18.6557	10	10	6	1	729	80.2	8.27
P16401	Histone H1.5 OS=Homo sapiens GN=HIST1H1B PE=1 SV=3	18.5841	5	5	4	1	226	22.6	10.92
Q8TCT9	Minor histocompatibility antigen H13 OS=Homo sapiens GN=HM13 PE=1 SV=1	18.5676	4	5	4	1	377	41.5	6.43
Q12905	Interleukin enhancer-binding factor 2 OS=Homo sapiens GN=ILF2 PE=1 SV=2	18.4615	5	6	5	1	390	43	5.26
P00367	Glutamate dehydrogenase 1, mitochondrial OS=Homo sapiens GN=GLUD1 PE=1 SV=2	18.2796	8	9	8	1	558	61.4	7.8
Q08722	Leukocyte surface antigen CD47 OS=Homo sapiens GN=CD47 PE=1 SV=1	18.2663	4	4	4	1	323	35.2	7.21
Q13505	Metaxin-1 OS=Homo sapiens GN=MTX1 PE=1 SV=2	18.2403	6	8	6	1	466	51.4	9.79
P05161	Ubiquitin-like protein ISG15 OS=Homo sapiens GN=ISG15 PE=1 SV=5	18.1818	1	1	1	1	165	17.9	7.44
Q96G23	Ceramide synthase 2 OS=Homo sapiens GN=CERS2 PE=1 SV=1	18.1579	4	6	4	1	380	44.8	8.98
P52943	Isoform 2 of Cysteine-rich protein 2 OS=Homo sapiens GN=CRIP2	18.0851	2	2	2	1	282	30.2	8.22
Q7Z7H5	Transmembrane emp24 domain-containing protein 4 OS=Homo sapiens GN=TMED4 PE=1 SV=1	18.0617	4	6	2	1	227	25.9	8.28
Q9P2X0	Isoform 2 of Dolichol-phosphate mannosyltransferase subunit 3 OS=Homo sapiens GN=DPM3	18.0328	2	2	2	1	122	13.3	8.35
Q9Y2R0	Cytochrome c oxidase assembly factor 3 homolog, mitochondrial OS=Homo sapiens GN=COA3 PE=1 SV=1	17.9245	2	2	2	1	106	11.7	9.6
P51571	Translocon-associated protein subunit delta OS=Homo sapiens GN=SSR4 PE=1 SV=1	17.9191	3	4	3	1	173	19	6.15
P04259	Keratin, type II cytoskeletal 6B OS=Homo sapiens GN=KRT6B PE=1 SV=5	17.9078	13	15	1	1	564	60	8
P09972	Fructose-bisphosphate aldolase C OS=Homo sapiens GN=ALDOC PE=1 SV=2	17.8571	5	8	1	1	364	39.4	6.87
Q3ZAQ7	Vacuolar ATPase assembly integral membrane protein VMA21 OS=Homo sapiens GN=VMA21 PE=1 SV=1	17.8218	2	2	2	1	101	11.3	7.24
Q13084	39S ribosomal protein L28, mitochondrial OS=Homo sapiens GN=MRPL28 PE=1 SV=4	17.5781	2	2	2	1	256	30.1	8.29
Q9BUN8	Derlin-1 OS=Homo sapiens GN=DERL1 PE=1 SV=1	17.5299	3	4	3	1	251	28.8	9.51
P62906	60S ribosomal protein L10a OS=Homo sapiens GN=RPL10A PE=1 SV=2	17.5115	4	4	4	1	217	24.8	9.94
P06493	Cyclin-dependent kinase 1 OS=Homo sapiens GN=CDK1 PE=1 SV=3	17.5084	4	4	3	1	297	34.1	8.4
Q9UHQ9	NADH-cytochrome b5 reductase 1 OS=Homo sapiens GN=CYB5R1 PE=1 SV=1	17.377	3	3	3	1	305	34.1	9.38
P07910	Heterogeneous nuclear ribonucleoproteins C1/C2 OS=Homo sapiens GN=HNRNPC PE=1 SV=4	17.3203	8	9	2	1	306	33.7	5.08
P12956	X-ray repair cross-complementing protein 6 OS=Homo sapiens GN=XRCC6 PE=1 SV=2	17.2414	9	11	9	1	609	69.8	6.64
Q9UHG3	Prenylcysteine oxidase 1 OS=Homo sapiens GN=PCYOX1 PE=1 SV=3	17.2277	6	7	6	1	505	56.6	6.18
Q15293	Reticulocalbin-1 OS=Homo sapiens GN=RCN1 PE=1 SV=1	17.2205	5	6	5	1	331	38.9	5
P12268	Inosine-5'-monophosphate dehydrogenase 2 OS=Homo sapiens GN=IMPDH2 PE=1 SV=2	17.1206	6	6	6	1	514	55.8	6.9
Q9Y265	RuvB-like 1 OS=Homo sapiens GN=RUVBL1 PE=1 SV=1	17.1053	5	5	5	1	456	50.2	6.42
Q16850	Lanosterol 14-alpha demethylase OS=Homo sapiens GN=CYP51A1 PE=1 SV=3	17.0974	6	6	6	1	503	56.8	8.53
Q9UM00	Calcium load-activated calcium channel OS=Homo sapiens GN=TMCO1 PE=1 SV=1	17.0213	3	3	3	1	188	21.2	9.74
Q8N138	ORM1-like protein 3 OS=Homo sapiens GN=ORMDL3 PE=1 SV=1	16.9935	2	2	2	1	153	17.5	9.64
P11233	Ras-related protein Ral-A OS=Homo sapiens GN=RALA PE=1 SV=1	16.9903	3	3	3	1	206	23.6	7.11
Q9UII2	ATPase inhibitor, mitochondrial OS=Homo sapiens GN=ATPIF1 PE=1 SV=1	16.9811	3	9	3	1	106	12.2	9.35
P62861	40S ribosomal protein S30 OS=Homo sapiens GN=FAU PE=1 SV=1	16.9492	1	1	1	1	59	6.6	12.15
Q9BYD1	39S ribosomal protein L13, mitochondrial OS=Homo sapiens GN=MRPL13 PE=1 SV=1	16.8539	2	2	2	1	178	20.7	9.16
P62745	Rho-related GTP-binding protein RhoB OS=Homo sapiens GN=RHOB PE=1 SV=1	16.8367	2	2	1	1	196	22.1	5.24
P52209	6-phosphogluconate dehydrogenase, decarboxylating OS=Homo sapiens GN=PGD PE=1 SV=3	16.7702	7	8	7	1	483	53.1	7.23
Q93096	Protein tyrosine phosphatase type IVA 1 OS=Homo sapiens GN=PTP4A1 PE=1 SV=2	16.763	1	2	1	1	173	19.8	8.97
Q9Y276	Mitochondrial chaperone BCS1 OS=Homo sapiens GN=BCS1L PE=1 SV=1	16.7064	4	5	4	1	419	47.5	8.5
P29373	Cellular retinoic acid-binding protein 2 OS=Homo sapiens GN=CRABP2 PE=1 SV=2	16.6667	2	2	2	1	138	15.7	5.4
Q9Y6A9	Signal peptidase complex subunit 1 OS=Homo sapiens GN=SPCS1 PE=1 SV=4	16.6667	1	1	1	1	102	11.8	9.31
P62072	Mitochondrial import inner membrane translocase subunit Tim10 OS=Homo sapiens GN=TIMM10 PE=1 SV=1	16.6667	2	2	2	1	90	10.3	6.29
P26373	60S ribosomal protein L13 OS=Homo sapiens GN=RPL13 PE=1 SV=4	16.5877	4	4	4	1	211	24.2	11.65
P08579	U2 small nuclear ribonucleoprotein B'' OS=Homo sapiens GN=SNRPB2 PE=1 SV=1	16.4444	3	3	2	1	225	25.5	9.72
P26368	Splicing factor U2AF 65 kDa subunit OS=Homo sapiens GN=U2AF2 PE=1 SV=4	16.4211	6	7	6	1	475	53.5	9.09
P04062	Glucosylceramidase OS=Homo sapiens GN=GBA PE=1 SV=3	16.4179	7	7	7	1	536	59.7	7.61
Q93084	Isoform SERCA3A of Sarcoplasmic/endoplasmic reticulum calcium ATPase 3 OS=Homo sapiens GN=ATP2A3	16.3163	14	14	8	1	999	109.2	5.52
P62913	60S ribosomal protein L11 OS=Homo sapiens GN=RPL11 PE=1 SV=2	16.2921	3	3	3	1	178	20.2	9.6
P60866	Isoform 2 of 40S ribosomal protein S20 OS=Homo sapiens GN=RPS20	16.1972	2	3	2	1	142	16	9.32
Q5JRX3	Isoform 2 of Presequence protease, mitochondrial OS=Homo sapiens GN=PITRM1	16.185	9	10	9	1	1038	117.4	6.92
Q9C005	Protein dpy-30 homolog OS=Homo sapiens GN=DPY30 PE=1 SV=1	16.1616	1	1	1	1	99	11.2	4.88
Q9H2W6	39S ribosomal protein L46, mitochondrial OS=Homo sapiens GN=MRPL46 PE=1 SV=1	16.129	2	2	2	1	279	31.7	7.05
P31947	14-3-3 protein sigma OS=Homo sapiens GN=SFN PE=1 SV=1	16.129	3	5	1	1	248	27.8	4.74
Q9Y624	Junctional adhesion molecule A OS=Homo sapiens GN=F11R PE=1 SV=1	16.0535	4	4	4	1	299	32.6	7.9
P83881	60S ribosomal protein L36a OS=Homo sapiens GN=RPL36A PE=1 SV=2	16.0377	2	2	2	1	106	12.4	10.58
Q96HY6	DDRGK domain-containing protein 1 OS=Homo sapiens GN=DDRGK1 PE=1 SV=2	15.9236	3	3	3	1	314	35.6	5.12
P60660	Myosin light polypeptide 6 OS=Homo sapiens GN=MYL6 PE=1 SV=2	15.894	2	2	2	1	151	16.9	4.65
Q6UW68	Transmembrane protein 205 OS=Homo sapiens GN=TMEM205 PE=1 SV=1	15.873	2	3	2	1	189	21.2	8.62
Q9Y5M8	Signal recognition particle receptor subunit beta OS=Homo sapiens GN=SRPRB PE=1 SV=3	15.8672	3	3	3	1	271	29.7	9.04
O14684	Prostaglandin E synthase OS=Homo sapiens GN=PTGES PE=1 SV=2	15.7895	1	1	1	1	152	17.1	9.5
O94826	Mitochondrial import receptor subunit TOM70 OS=Homo sapiens GN=TOMM70 PE=1 SV=1	15.7895	7	9	7	1	608	67.4	7.12
Q96HY7	Probable 2-oxoglutarate dehydrogenase E1 component DHKTD1, mitochondrial OS=Homo sapiens GN=DHTKD1 PE=1 SV=2	15.778	8	11	8	1	919	103	6.93
P53618	Coatomer subunit beta OS=Homo sapiens GN=COPB1 PE=1 SV=3	15.7398	11	11	11	1	953	107.1	6.05
P25789	Proteasome subunit alpha type-4 OS=Homo sapiens GN=PSMA4 PE=1 SV=1	15.7088	2	2	2	1	261	29.5	7.72
P30038	Delta-1-pyrroline-5-carboxylate dehydrogenase, mitochondrial OS=Homo sapiens GN=ALDH4A1 PE=1 SV=3	15.6306	7	8	7	1	563	61.7	8.07
P13987	CD59 glycoprotein OS=Homo sapiens GN=CD59 PE=1 SV=1	15.625	2	3	2	1	128	14.2	6.48
P82909	28S ribosomal protein S36, mitochondrial OS=Homo sapiens GN=MRPS36 PE=1 SV=2	15.534	1	1	1	1	103	11.5	9.99
Q10567	AP-1 complex subunit beta-1 OS=Homo sapiens GN=AP1B1 PE=1 SV=2	15.49	9	12	4	1	949	104.6	5.06
Q15286	Ras-related protein Rab-35 OS=Homo sapiens GN=RAB35 PE=1 SV=1	15.4229	3	5	1	1	201	23	8.29
P43487	Ran-specific GTPase-activating protein OS=Homo sapiens GN=RANBP1 PE=1 SV=1	15.4229	3	4	3	1	201	23.3	5.29
Q12849	G-rich sequence factor 1 OS=Homo sapiens GN=GRSF1 PE=1 SV=3	15.4167	4	5	4	1	480	53.1	6.19
P30536	Translocator protein OS=Homo sapiens GN=TSPO PE=1 SV=3	15.3846	1	1	1	1	169	18.8	9.36
P21926	CD9 antigen OS=Homo sapiens GN=CD9 PE=1 SV=4	15.3509	2	3	2	1	228	25.4	7.15
P60033	CD81 antigen OS=Homo sapiens GN=CD81 PE=1 SV=1	15.2542	2	4	2	1	236	25.8	5.29
P61916	Epididymal secretory protein E1 OS=Homo sapiens GN=NPC2 PE=1 SV=1	15.2318	1	1	1	1	151	16.6	7.65
P82673	28S ribosomal protein S35, mitochondrial OS=Homo sapiens GN=MRPS35 PE=1 SV=1	15.1703	3	3	3	1	323	36.8	8.24
P13995	Bifunctional methylenetetrahydrofolate dehydrogenase/cyclohydrolase, mitochondrial OS=Homo sapiens GN=MTHFD2 PE=1 SV=2	15.1429	3	3	3	1	350	37.9	8.73
Q9UL25	Ras-related protein Rab-21 OS=Homo sapiens GN=RAB21 PE=1 SV=3	15.1111	3	3	3	1	225	24.3	7.94
Q14103	Heterogeneous nuclear ribonucleoprotein D0 OS=Homo sapiens GN=HNRNPD PE=1 SV=1	14.9296	5	6	3	1	355	38.4	7.81
P22061	Isoform 2 of Protein-L-isoaspartate(D-aspartate) O-methyltransferase OS=Homo sapiens GN=PCMT1	14.9123	1	1	1	1	228	24.7	6.52
P23246	Splicing factor, proline- and glutamine-rich OS=Homo sapiens GN=SFPQ PE=1 SV=2	14.8515	9	10	8	1	707	76.1	9.44
P51398	28S ribosomal protein S29, mitochondrial OS=Homo sapiens GN=DAP3 PE=1 SV=1	14.8241	4	6	4	1	398	45.5	8.88
P56181	NADH dehydrogenase [ubiquinone] flavoprotein 3, mitochondrial OS=Homo sapiens GN=NDUFV3 PE=1 SV=2	14.8148	1	1	1	1	108	11.9	9.7
Q16740	ATP-dependent Clp protease proteolytic subunit, mitochondrial OS=Homo sapiens GN=CLPP PE=1 SV=1	14.8014	3	3	3	1	277	30.2	8.09
P35606	Coatomer subunit beta' OS=Homo sapiens GN=COPB2 PE=1 SV=2	14.7903	11	12	11	1	906	102.4	5.27
P50443	Sulfate transporter OS=Homo sapiens GN=SLC26A2 PE=1 SV=2	14.7497	7	8	7	1	739	81.6	8.38
P49821	NADH dehydrogenase [ubiquinone] flavoprotein 1, mitochondrial OS=Homo sapiens GN=NDUFV1 PE=1 SV=4	14.6552	4	6	4	1	464	50.8	8.21
Q9UL46	Proteasome activator complex subunit 2 OS=Homo sapiens GN=PSME2 PE=1 SV=4	14.6444	2	2	2	1	239	27.4	5.73
P35637	RNA-binding protein FUS OS=Homo sapiens GN=FUS PE=1 SV=1	14.6388	7	8	7	1	526	53.4	9.36
P61158	Actin-related protein 3 OS=Homo sapiens GN=ACTR3 PE=1 SV=3	14.5933	3	3	3	1	418	47.3	5.88
Q16795	NADH dehydrogenase [ubiquinone] 1 alpha subcomplex subunit 9, mitochondrial OS=Homo sapiens GN=NDUFA9 PE=1 SV=2	14.5889	4	5	4	1	377	42.5	9.8
O14602	Eukaryotic translation initiation factor 1A, Y-chromosomal OS=Homo sapiens GN=EIF1AY PE=1 SV=4	14.5833	2	2	2	1	144	16.4	5.24
Q5JPE7	Nodal modulator 2 OS=Homo sapiens GN=NOMO2 PE=1 SV=1	14.5225	10	11	10	1	1267	139.4	5.76
Q01130	Serine/arginine-rich splicing factor 2 OS=Homo sapiens GN=SRSF2 PE=1 SV=4	14.4796	4	5	4	1	221	25.5	11.85
P18621	Isoform 3 of 60S ribosomal protein L17 OS=Homo sapiens GN=RPL17	14.4737	4	4	4	1	228	26.4	10.1
P47914	60S ribosomal protein L29 OS=Homo sapiens GN=RPL29 PE=1 SV=2	14.4654	2	3	2	1	159	17.7	11.66
O95197	Isoform 3 of Reticulon-3 OS=Homo sapiens GN=RTN3	14.4068	3	4	3	1	236	25.6	8.51
Q16540	39S ribosomal protein L23, mitochondrial OS=Homo sapiens GN=MRPL23 PE=1 SV=1	14.3791	1	1	1	1	153	17.8	9.69
Q8IUR0	Trafficking protein particle complex subunit 5 OS=Homo sapiens GN=TRAPPC5 PE=1 SV=1	14.3617	1	1	1	1	188	20.8	9.66
P28331	Isoform 2 of NADH-ubiquinone oxidoreductase 75 kDa subunit, mitochondrial OS=Homo sapiens GN=NDUFS1	14.305	8	8	8	1	741	80.9	6.64
Q9GZM5	Protein YIPF3 OS=Homo sapiens GN=YIPF3 PE=1 SV=1	14.2857	2	3	2	1	350	38.2	5.76
A8K5M9	Uncharacterized protein C15orf62, mitochondrial OS=Homo sapiens GN=C15orf62 PE=2 SV=1	14.2857	1	1	1	1	175	19.7	8.5
P51153	Ras-related protein Rab-13 OS=Homo sapiens GN=RAB13 PE=1 SV=1	14.2857	3	3	1	1	203	22.8	9.19
P61619	Protein transport protein Sec61 subunit alpha isoform 1 OS=Homo sapiens GN=SEC61A1 PE=1 SV=2	14.2857	4	4	4	1	476	52.2	8.06
Q10713	Mitochondrial-processing peptidase subunit alpha OS=Homo sapiens GN=PMPCA PE=1 SV=2	14.2857	6	6	6	1	525	58.2	6.92
O60568	Procollagen-lysine,2-oxoglutarate 5-dioxygenase 3 OS=Homo sapiens GN=PLOD3 PE=1 SV=1	14.2276	6	7	6	1	738	84.7	6.05
Q13724	Mannosyl-oligosaccharide glucosidase OS=Homo sapiens GN=MOGS PE=1 SV=5	14.2174	6	8	6	1	837	91.9	8.9
O43505	Beta-1,4-glucuronyltransferase 1 OS=Homo sapiens GN=B4GAT1 PE=1 SV=1	14.2169	2	3	2	1	415	47.1	7.2
O95857	Tetraspanin-13 OS=Homo sapiens GN=TSPAN13 PE=2 SV=1	14.2157	2	2	2	1	204	22.1	7.93
O43752	Syntaxin-6 OS=Homo sapiens GN=STX6 PE=1 SV=1	14.1176	2	2	2	1	255	29.2	4.93
Q9NX14	Isoform 2 of NADH dehydrogenase [ubiquinone] 1 beta subcomplex subunit 11, mitochondrial OS=Homo sapiens GN=NDUFB11	14.1104	1	1	1	1	163	18.4	5.24
Q9Y639	Neuroplastin OS=Homo sapiens GN=NPTN PE=1 SV=2	14.0704	4	4	4	1	398	44.4	7.99
Q8N766	ER membrane protein complex subunit 1 OS=Homo sapiens GN=EMC1 PE=1 SV=1	13.998	8	8	8	1	993	111.7	7.66
P21291	Cysteine and glycine-rich protein 1 OS=Homo sapiens GN=CSRP1 PE=1 SV=3	13.9896	2	2	2	1	193	20.6	8.57
O75521	Enoyl-CoA delta isomerase 2, mitochondrial OS=Homo sapiens GN=ECI2 PE=1 SV=4	13.9594	3	3	3	1	394	43.6	9
P30505	HLA class I histocompatibility antigen, Cw-8 alpha chain OS=Homo sapiens GN=HLA-C PE=1 SV=1	13.9344	3	3	3	1	366	40.7	6.98
Q10589	Bone marrow stromal antigen 2 OS=Homo sapiens GN=BST2 PE=1 SV=1	13.8889	2	2	2	1	180	19.8	5.6
Q96I45	Transmembrane protein 141 OS=Homo sapiens GN=TMEM141 PE=1 SV=1	13.8889	1	1	1	1	108	11.9	8.5
P50990	T-complex protein 1 subunit theta OS=Homo sapiens GN=CCT8 PE=1 SV=4	13.8686	7	7	7	1	548	59.6	5.6
P17568	NADH dehydrogenase [ubiquinone] 1 beta subcomplex subunit 7 OS=Homo sapiens GN=NDUFB7 PE=1 SV=4	13.8686	2	2	2	1	137	16.4	8.92
Q6RW13	Type-1 angiotensin II receptor-associated protein OS=Homo sapiens GN=AGTRAP PE=1 SV=1	13.8365	1	1	1	1	159	17.4	6.14
Q96NT0	Isoform 2 of Coiled-coil domain-containing protein 115 OS=Homo sapiens GN=CCDC115	13.8298	1	1	1	1	188	20.4	8.34
Q9BRK5	45 kDa calcium-binding protein OS=Homo sapiens GN=SDF4 PE=1 SV=1	13.8122	3	6	3	1	362	41.8	4.86
Q5JWF2	Guanine nucleotide-binding protein G(s) subunit alpha isoforms XLas OS=Homo sapiens GN=GNAS PE=1 SV=2	13.7898	11	11	10	1	1037	111	5.03
Q99497	Protein deglycase DJ-1 OS=Homo sapiens GN=PARK7 PE=1 SV=2	13.7566	1	1	1	1	189	19.9	6.79
Q6UW56	Isoform 3 of All-trans retinoic acid-induced differentiation factor OS=Homo sapiens GN=ATRAID	13.7324	1	2	1	1	284	30.3	8.28
P56381	ATP synthase subunit epsilon, mitochondrial OS=Homo sapiens GN=ATP5E PE=1 SV=2	13.7255	1	1	1	1	51	5.8	9.92
O15127	Secretory carrier-associated membrane protein 2 OS=Homo sapiens GN=SCAMP2 PE=1 SV=2	13.6778	3	4	3	1	329	36.6	6.1
O60888	Isoform A of Protein CutA OS=Homo sapiens GN=CUTA	13.6364	1	2	1	1	198	20.9	5.48
Q969Z0	Protein TBRG4 OS=Homo sapiens GN=TBRG4 PE=1 SV=1	13.6292	4	4	4	1	631	70.7	7.42
Q86XR7	Isoform 2 of TIR domain-containing adapter molecule 2 OS=Homo sapiens GN=TICAM2	13.6139	4	4	4	1	404	46.1	5.12
P20290	Transcription factor BTF3 OS=Homo sapiens GN=BTF3 PE=1 SV=1	13.5922	2	2	1	1	206	22.2	9.38
P49748	Isoform 3 of Very long-chain specific acyl-CoA dehydrogenase, mitochondrial OS=Homo sapiens GN=ACADVL	13.5693	6	6	6	1	678	72.9	8.75
O43681	ATPase ASNA1 OS=Homo sapiens GN=ASNA1 PE=1 SV=2	13.5057	4	4	4	1	348	38.8	4.91
O95983	Methyl-CpG-binding domain protein 3 OS=Homo sapiens GN=MBD3 PE=1 SV=1	13.4021	1	1	1	1	291	32.8	5.34
P31937	3-hydroxyisobutyrate dehydrogenase, mitochondrial OS=Homo sapiens GN=HIBADH PE=1 SV=2	13.3929	3	3	3	1	336	35.3	8.13
P55795	Heterogeneous nuclear ribonucleoprotein H2 OS=Homo sapiens GN=HNRNPH2 PE=1 SV=1	13.363	4	7	1	1	449	49.2	6.3
O43747	Isoform 2 of AP-1 complex subunit gamma-1 OS=Homo sapiens GN=AP1G1	13.3333	6	7	6	1	825	91.7	6.8
P61163	Alpha-centractin OS=Homo sapiens GN=ACTR1A PE=1 SV=1	13.2979	3	3	3	1	376	42.6	6.64
O75915	PRA1 family protein 3 OS=Homo sapiens GN=ARL6IP5 PE=1 SV=1	13.2979	3	3	3	1	188	21.6	9.77
Q9Y2Q3	Glutathione S-transferase kappa 1 OS=Homo sapiens GN=GSTK1 PE=1 SV=3	13.2743	2	2	2	1	226	25.5	8.41
P03928	ATP synthase protein 8 OS=Homo sapiens GN=MT-ATP8 PE=1 SV=1	13.2353	1	1	1	1	68	8	9.91
P11166	Solute carrier family 2, facilitated glucose transporter member 1 OS=Homo sapiens GN=SLC2A1 PE=1 SV=2	13.2114	7	7	7	1	492	54	8.72
P17301	Integrin alpha-2 OS=Homo sapiens GN=ITGA2 PE=1 SV=1	13.2091	10	10	10	1	1181	129.2	5.31
Q14802	Isoform 3 of FXYD domain-containing ion transport regulator 3 OS=Homo sapiens GN=FXYD3	13.1944	1	3	1	1	144	15.1	7.84
P61088	Ubiquitin-conjugating enzyme E2 N OS=Homo sapiens GN=UBE2N PE=1 SV=1	13.1579	1	1	1	1	152	17.1	6.57
Q8TCD1	UPF0729 protein C18orf32 OS=Homo sapiens GN=C18orf32 PE=3 SV=1	13.1579	1	1	1	1	76	8.7	9.13
Q8N5M9	Protein jagunal homolog 1 OS=Homo sapiens GN=JAGN1 PE=1 SV=1	13.1148	2	2	2	1	183	21.1	9.73
Q96HJ9	Isoform 2 of UPF0562 protein C7orf55 OS=Homo sapiens GN=C7orf55	13.1004	6	6	6	1	458	54.2	10.13
Q96GC9	Vacuole membrane protein 1 OS=Homo sapiens GN=VMP1 PE=1 SV=1	13.0542	3	5	3	1	406	46.2	6.95
Q13148	TAR DNA-binding protein 43 OS=Homo sapiens GN=TARDBP PE=1 SV=1	13.0435	3	3	3	1	414	44.7	6.19
Q5K4L6	Long-chain fatty acid transport protein 3 OS=Homo sapiens GN=SLC27A3 PE=2 SV=3	13.0137	3	5	3	1	730	78.6	7.49
O15382	Branched-chain-amino-acid aminotransferase, mitochondrial OS=Homo sapiens GN=BCAT2 PE=1 SV=2	13.0102	4	4	4	1	392	44.3	8.65
Q99805	Transmembrane 9 superfamily member 2 OS=Homo sapiens GN=TM9SF2 PE=1 SV=1	12.9713	6	8	5	1	663	75.7	7.44
P07602	Isoform Sap-mu-9 of Prosaposin OS=Homo sapiens GN=PSAP	12.9032	6	8	6	1	527	58.4	5.14
Q99595	Mitochondrial import inner membrane translocase subunit Tim17-A OS=Homo sapiens GN=TIMM17A PE=1 SV=1	12.8655	1	1	1	1	171	18	7.87
Q9H910	Isoform 3 of Hematological and neurological expressed 1-like protein OS=Homo sapiens GN=HN1L	12.844	2	2	2	1	218	23	9.57
P35222	Catenin beta-1 OS=Homo sapiens GN=CTNNB1 PE=1 SV=1	12.8041	7	9	4	1	781	85.4	5.86
Q9BWJ5	Splicing factor 3B subunit 5 OS=Homo sapiens GN=SF3B5 PE=1 SV=1	12.7907	1	1	1	1	86	10.1	6.35
Q6UXG2	UPF0577 protein KIAA1324 OS=Homo sapiens GN=KIAA1324 PE=2 SV=2	12.7345	10	10	10	1	1013	111.3	6.55
P51553	Isocitrate dehydrogenase [NAD] subunit gamma, mitochondrial OS=Homo sapiens GN=IDH3G PE=1 SV=1	12.7226	4	5	4	1	393	42.8	8.5
Q9UNK0	Syntaxin-8 OS=Homo sapiens GN=STX8 PE=1 SV=2	12.7119	1	1	1	1	236	26.9	4.98
Q9NRP2	COX assembly mitochondrial protein 2 homolog OS=Homo sapiens GN=CMC2 PE=1 SV=1	12.6582	1	1	1	1	79	9.5	7.87
P00966	Argininosuccinate synthase OS=Homo sapiens GN=ASS1 PE=1 SV=2	12.6214	5	5	5	1	412	46.5	8.02
Q9HAT2	Sialate O-acetylesterase OS=Homo sapiens GN=SIAE PE=1 SV=1	12.6195	2	2	2	1	523	58.3	7.33
P50402	Emerin OS=Homo sapiens GN=EMD PE=1 SV=1	12.5984	3	3	3	1	254	29	5.5
P54886	Delta-1-pyrroline-5-carboxylate synthase OS=Homo sapiens GN=ALDH18A1 PE=1 SV=2	12.5786	8	9	8	1	795	87.2	7.12
P10415	Apoptosis regulator Bcl-2 OS=Homo sapiens GN=BCL2 PE=1 SV=2	12.5523	1	1	1	1	239	26.2	7.28
Q9GZP9	Derlin-2 OS=Homo sapiens GN=DERL2 PE=1 SV=1	12.5523	1	1	1	1	239	27.5	7.28
Q16698	2,4-dienoyl-CoA reductase, mitochondrial OS=Homo sapiens GN=DECR1 PE=1 SV=1	12.5373	3	3	3	1	335	36	9.28
Q9NZM1	Myoferlin OS=Homo sapiens GN=MYOF PE=1 SV=1	12.4697	17	18	17	1	2061	234.6	6.18
P32322	Isoform 3 of Pyrroline-5-carboxylate reductase 1, mitochondrial OS=Homo sapiens GN=PYCR1	12.4277	3	4	3	1	346	36	7.61
P53597	Succinate--CoA ligase [ADP/GDP-forming] subunit alpha, mitochondrial OS=Homo sapiens GN=SUCLG1 PE=1 SV=4	12.4277	4	4	4	1	346	36.2	8.79
O43615	Mitochondrial import inner membrane translocase subunit TIM44 OS=Homo sapiens GN=TIMM44 PE=1 SV=2	12.3894	5	6	5	1	452	51.3	8.32
Q9BSH5	Haloacid dehalogenase-like hydrolase domain-containing protein 3 OS=Homo sapiens GN=HDHD3 PE=1 SV=1	12.3506	2	2	2	1	251	28	6.71
O75306	NADH dehydrogenase [ubiquinone] iron-sulfur protein 2, mitochondrial OS=Homo sapiens GN=NDUFS2 PE=1 SV=2	12.311	4	4	4	1	463	52.5	7.55
P11279	Lysosome-associated membrane glycoprotein 1 OS=Homo sapiens GN=LAMP1 PE=1 SV=3	12.2302	5	7	5	1	417	44.9	8.75
Q07666	KH domain-containing, RNA-binding, signal transduction-associated protein 1 OS=Homo sapiens GN=KHDRBS1 PE=1 SV=1	12.1896	5	7	5	1	443	48.2	8.66
Q92552	Isoform 2 of 28S ribosomal protein S27, mitochondrial OS=Homo sapiens GN=MRPS27	12.1495	3	3	3	1	428	49.1	6.33
Q00577	Transcriptional activator protein Pur-alpha OS=Homo sapiens GN=PURA PE=1 SV=2	12.1118	2	2	2	1	322	34.9	6.44
P82914	28S ribosomal protein S15, mitochondrial OS=Homo sapiens GN=MRPS15 PE=1 SV=1	12.0623	3	3	3	1	257	29.8	10.48
Q01628	Interferon-induced transmembrane protein 3 OS=Homo sapiens GN=IFITM3 PE=1 SV=2	12.0301	1	1	1	1	133	14.6	7.01
P61225	Ras-related protein Rap-2b OS=Homo sapiens GN=RAP2B PE=1 SV=1	12.0219	2	2	2	1	183	20.5	4.81
Q9Y606	tRNA pseudouridine synthase A, mitochondrial OS=Homo sapiens GN=PUS1 PE=1 SV=3	11.9438	4	4	4	1	427	47.4	8.41
O15269	Serine palmitoyltransferase 1 OS=Homo sapiens GN=SPTLC1 PE=1 SV=1	11.8393	4	4	4	1	473	52.7	6.01
O76021	Ribosomal L1 domain-containing protein 1 OS=Homo sapiens GN=RSL1D1 PE=1 SV=3	11.8367	5	6	5	1	490	54.9	10.13
Q15041	ADP-ribosylation factor-like protein 6-interacting protein 1 OS=Homo sapiens GN=ARL6IP1 PE=1 SV=2	11.8227	3	3	3	1	203	23.3	9.32
Q5VWZ2	Lysophospholipase-like protein 1 OS=Homo sapiens GN=LYPLAL1 PE=1 SV=3	11.8143	1	1	1	1	237	26.3	7.84
Q8NF37	Lysophosphatidylcholine acyltransferase 1 OS=Homo sapiens GN=LPCAT1 PE=1 SV=2	11.7978	4	5	4	1	534	59.1	6.02
P21912	Succinate dehydrogenase [ubiquinone] iron-sulfur subunit, mitochondrial OS=Homo sapiens GN=SDHB PE=1 SV=3	11.7857	3	3	3	1	280	31.6	8.76
O75369	Isoform 8 of Filamin-B OS=Homo sapiens GN=FLNB	11.7736	18	20	13	1	2633	281.5	5.71
P62310	U6 snRNA-associated Sm-like protein LSm3 OS=Homo sapiens GN=LSM3 PE=1 SV=2	11.7647	1	1	1	1	102	11.8	4.7
Q14974	Importin subunit beta-1 OS=Homo sapiens GN=KPNB1 PE=1 SV=2	11.758	6	9	6	1	876	97.1	4.78
Q9UBS4	DnaJ homolog subfamily B member 11 OS=Homo sapiens GN=DNAJB11 PE=1 SV=1	11.7318	2	2	2	1	358	40.5	6.18
O60783	28S ribosomal protein S14, mitochondrial OS=Homo sapiens GN=MRPS14 PE=1 SV=1	11.7188	1	1	1	1	128	15.1	11.41
Q13510	Isoform 2 of Acid ceramidase OS=Homo sapiens GN=ASAH1	11.6788	3	3	3	1	411	46.5	7.85
P52758	Ribonuclease UK114 OS=Homo sapiens GN=HRSP12 PE=1 SV=1	11.6788	1	1	1	1	137	14.5	8.68
P61009	Signal peptidase complex subunit 3 OS=Homo sapiens GN=SPCS3 PE=1 SV=1	11.6667	2	2	2	1	180	20.3	8.62
Q00688	Peptidyl-prolyl cis-trans isomerase FKBP3 OS=Homo sapiens GN=FKBP3 PE=1 SV=1	11.6071	2	2	2	1	224	25.2	9.28
P07947	Tyrosine-protein kinase Yes OS=Homo sapiens GN=YES1 PE=1 SV=3	11.6022	3	3	2	1	543	60.8	6.74
Q9Y6I9	Testis-expressed sequence 264 protein OS=Homo sapiens GN=TEX264 PE=1 SV=1	11.5016	3	3	3	1	313	34.2	4.86
Q9Y3I0	tRNA-splicing ligase RtcB homolog OS=Homo sapiens GN=RTCB PE=1 SV=1	11.4851	3	3	3	1	505	55.2	7.23
Q99536	Synaptic vesicle membrane protein VAT-1 homolog OS=Homo sapiens GN=VAT1 PE=1 SV=2	11.4504	2	3	2	1	393	41.9	6.29
Q96HR9	Receptor expression-enhancing protein 6 OS=Homo sapiens GN=REEP6 PE=1 SV=1	11.413	2	2	2	1	184	20.7	8.56
P62158	Calmodulin OS=Homo sapiens GN=CALM1 PE=1 SV=2	11.4094	1	2	1	1	149	16.8	4.22
Q14344	Guanine nucleotide-binding protein subunit alpha-13 OS=Homo sapiens GN=GNA13 PE=1 SV=2	11.4058	4	4	3	1	377	44	8
Q9BSY4	Isoform 2 of Coiled-coil-helix-coiled-coil-helix domain-containing protein 5 OS=Homo sapiens GN=CHCHD5	11.3924	1	1	1	1	158	17.7	7.85
Q969X5	Endoplasmic reticulum-Golgi intermediate compartment protein 1 OS=Homo sapiens GN=ERGIC1 PE=1 SV=1	11.3793	3	3	3	1	290	32.6	7.06
Q9NX58	Cell growth-regulating nucleolar protein OS=Homo sapiens GN=LYAR PE=1 SV=2	11.3456	2	2	2	1	379	43.6	9.54
O60220	Mitochondrial import inner membrane translocase subunit Tim8 A OS=Homo sapiens GN=TIMM8A PE=1 SV=1	11.3402	1	1	1	1	97	11	5.16
Q9UBV2	Protein sel-1 homolog 1 OS=Homo sapiens GN=SEL1L PE=1 SV=3	11.335	4	4	4	1	794	88.7	5.39
Q9Y291	28S ribosomal protein S33, mitochondrial OS=Homo sapiens GN=MRPS33 PE=1 SV=1	11.3208	1	1	1	1	106	12.6	10.11
Q92820	Gamma-glutamyl hydrolase OS=Homo sapiens GN=GGH PE=1 SV=2	11.3208	2	2	2	1	318	35.9	7.11
P09234	U1 small nuclear ribonucleoprotein C OS=Homo sapiens GN=SNRPC PE=1 SV=1	11.3208	1	1	1	1	159	17.4	9.67
P19367	Isoform 3 of Hexokinase-1 OS=Homo sapiens GN=HK1	11.2921	10	11	10	1	921	102.7	6.76
P16989	Y-box-binding protein 3 OS=Homo sapiens GN=YBX3 PE=1 SV=4	11.2903	4	6	1	1	372	40.1	9.77
P42166	Lamina-associated polypeptide 2, isoform alpha OS=Homo sapiens GN=TMPO PE=1 SV=2	11.2392	4	5	4	1	694	75.4	7.66
P22307	Non-specific lipid-transfer protein OS=Homo sapiens GN=SCP2 PE=1 SV=2	11.1517	6	6	6	1	547	59	6.89
P51648	Isoform 2 of Fatty aldehyde dehydrogenase OS=Homo sapiens GN=ALDH3A2	11.0236	4	5	4	1	508	57.6	8.92
Q92520	Protein FAM3C OS=Homo sapiens GN=FAM3C PE=1 SV=1	11.0132	2	3	2	1	227	24.7	8.29
P50395	Rab GDP dissociation inhibitor beta OS=Homo sapiens GN=GDI2 PE=1 SV=2	11.0112	3	3	3	1	445	50.6	6.47
O00487	26S proteasome non-ATPase regulatory subunit 14 OS=Homo sapiens GN=PSMD14 PE=1 SV=1	10.9677	1	2	1	1	310	34.6	6.52
Q9Y5S9	RNA-binding protein 8A OS=Homo sapiens GN=RBM8A PE=1 SV=1	10.9195	1	1	1	1	174	19.9	5.72
Q7L0Y3	Mitochondrial ribonuclease P protein 1 OS=Homo sapiens GN=TRMT10C PE=1 SV=2	10.9181	4	4	4	1	403	47.3	9.36
O43760	Isoform 2 of Synaptogyrin-2 OS=Homo sapiens GN=SYNGR2	10.9091	3	3	3	1	275	30.4	9.2
Q9NNW7	Thioredoxin reductase 2, mitochondrial OS=Homo sapiens GN=TXNRD2 PE=1 SV=3	10.8779	3	4	3	1	524	56.5	7.5
P30153	Serine/threonine-protein phosphatase 2A 65 kDa regulatory subunit A alpha isoform OS=Homo sapiens GN=PPP2R1A PE=1 SV=4	10.8659	4	4	4	1	589	65.3	5.11
O60716	Catenin delta-1 OS=Homo sapiens GN=CTNND1 PE=1 SV=1	10.8471	8	10	8	1	968	108.1	6.23
Q96I24	Far upstream element-binding protein 3 OS=Homo sapiens GN=FUBP3 PE=1 SV=2	10.8392	3	3	2	1	572	61.6	8.38
Q96Q11	CCA tRNA nucleotidyltransferase 1, mitochondrial OS=Homo sapiens GN=TRNT1 PE=1 SV=2	10.8295	3	3	3	1	434	50.1	8.1
Q9H3H5	UDP-N-acetylglucosamine--dolichyl-phosphate N-acetylglucosaminephosphotransferase OS=Homo sapiens GN=DPAGT1 PE=1 SV=2	10.7843	2	2	2	1	408	46.1	8
Q5RI15	Isoform 2 of Cytochrome c oxidase protein 20 homolog OS=Homo sapiens GN=COX20	10.7692	1	2	1	1	130	14.7	8.81
Q9H299	SH3 domain-binding glutamic acid-rich-like protein 3 OS=Homo sapiens GN=SH3BGRL3 PE=1 SV=1	10.7527	1	1	1	1	93	10.4	4.93
O60313	Isoform 2 of Dynamin-like 120 kDa protein, mitochondrial OS=Homo sapiens GN=OPA1	10.7322	8	8	8	1	997	115.8	7.87
O00571	ATP-dependent RNA helicase DDX3X OS=Homo sapiens GN=DDX3X PE=1 SV=3	10.7251	5	6	5	1	662	73.2	7.18
P04155	Trefoil factor 1 OS=Homo sapiens GN=TFF1 PE=1 SV=1	10.7143	1	1	1	1	84	9.1	4.35
Q8N183	Mimitin, mitochondrial OS=Homo sapiens GN=NDUFAF2 PE=1 SV=1	10.6509	1	1	1	1	169	19.8	8.97
Q08257	Quinone oxidoreductase OS=Homo sapiens GN=CRYZ PE=1 SV=1	10.6383	2	2	2	1	329	35.2	8.44
O60664	Perilipin-3 OS=Homo sapiens GN=PLIN3 PE=1 SV=3	10.5991	2	2	2	1	434	47	5.44
Q14444	Caprin-1 OS=Homo sapiens GN=CAPRIN1 PE=1 SV=2	10.5783	3	4	3	1	709	78.3	5.25
Q8NBN7	Retinol dehydrogenase 13 OS=Homo sapiens GN=RDH13 PE=1 SV=2	10.574	2	2	2	1	331	35.9	8.1
O14925	Mitochondrial import inner membrane translocase subunit Tim23 OS=Homo sapiens GN=TIMM23 PE=1 SV=1	10.5263	1	1	1	1	209	21.9	8.6
Q9HCM4	Band 4.1-like protein 5 OS=Homo sapiens GN=EPB41L5 PE=1 SV=3	10.5048	3	4	3	1	733	81.8	6.58
O75438	Isoform 2 of NADH dehydrogenase [ubiquinone] 1 beta subcomplex subunit 1 OS=Homo sapiens GN=NDUFB1	10.4762	1	2	1	1	105	11.9	8.73
Q15437	Protein transport protein Sec23B OS=Homo sapiens GN=SEC23B PE=1 SV=2	10.4302	4	4	2	1	767	86.4	6.89
Q15181	Inorganic pyrophosphatase OS=Homo sapiens GN=PPA1 PE=1 SV=2	10.3806	2	2	1	1	289	32.6	5.86
P68036	Isoform 3 of Ubiquitin-conjugating enzyme E2 L3 OS=Homo sapiens GN=UBE2L3	10.3774	1	1	1	1	212	24	8.75
Q8N5K1	CDGSH iron-sulfur domain-containing protein 2 OS=Homo sapiens GN=CISD2 PE=1 SV=1	10.3704	1	2	1	1	135	15.3	9.61
Q14160	Isoform 3 of Protein scribble homolog OS=Homo sapiens GN=SCRIB	10.3323	8	8	6	1	1655	177.6	5.11
Q5BJF2	Transmembrane protein 97 OS=Homo sapiens GN=TMEM97 PE=1 SV=1	10.2273	2	2	2	1	176	20.8	9.38
O43390	Isoform 2 of Heterogeneous nuclear ribonucleoprotein R OS=Homo sapiens GN=HNRNPR	10.2201	6	7	2	1	636	71.2	8.13
P25205	Isoform 2 of DNA replication licensing factor MCM3 OS=Homo sapiens GN=MCM3	10.1993	4	5	4	1	853	95.8	5.77
P10253	Lysosomal alpha-glucosidase OS=Homo sapiens GN=GAA PE=1 SV=4	10.1891	5	6	5	1	952	105.3	6
Q9H4A5	Golgi phosphoprotein 3-like OS=Homo sapiens GN=GOLPH3L PE=1 SV=1	10.1754	1	1	1	1	285	32.7	5.83
Q13247	Serine/arginine-rich splicing factor 6 OS=Homo sapiens GN=SRSF6 PE=1 SV=2	10.1744	4	5	4	1	344	39.6	11.43
Q8N0U8	Isoform 2 of Vitamin K epoxide reductase complex subunit 1-like protein 1 OS=Homo sapiens GN=VKORC1L1	10.1695	2	2	2	1	177	19.7	8.65
Q9Y3Q3	Transmembrane emp24 domain-containing protein 3 OS=Homo sapiens GN=TMED3 PE=1 SV=1	10.1382	2	2	2	1	217	24.8	5.6
Q92499	ATP-dependent RNA helicase DDX1 OS=Homo sapiens GN=DDX1 PE=1 SV=2	10.1351	4	6	4	1	740	82.4	7.23
P60602	Reactive oxygen species modulator 1 OS=Homo sapiens GN=ROMO1 PE=1 SV=1	10.1266	1	1	1	1	79	8.2	9.33
P61966	AP-1 complex subunit sigma-1A OS=Homo sapiens GN=AP1S1 PE=1 SV=1	10.1266	1	1	1	1	158	18.7	5.73
Q86Y39	Isoform 2 of NADH dehydrogenase [ubiquinone] 1 alpha subcomplex subunit 11 OS=Homo sapiens GN=NDUFA11	10.0877	1	1	1	1	228	23.4	8.82
P08962	CD63 antigen OS=Homo sapiens GN=CD63 PE=1 SV=2	10.084	3	3	3	1	238	25.6	7.81
O95298	NADH dehydrogenase [ubiquinone] 1 subunit C2 OS=Homo sapiens GN=NDUFC2 PE=1 SV=1	10.084	1	1	1	1	119	14.2	8.98
Q92896	Isoform 2 of Golgi apparatus protein 1 OS=Homo sapiens GN=GLG1	10.0582	10	10	10	1	1203	137.1	6.9
Q96GQ5	RUS1 family protein C16orf58 OS=Homo sapiens GN=C16orf58 PE=1 SV=2	10.0427	2	2	2	1	468	51	6.93
Q16836	Isoform 2 of Hydroxyacyl-coenzyme A dehydrogenase, mitochondrial OS=Homo sapiens GN=HADH	10	3	5	3	1	390	42.1	9.26
P58107	Epiplakin OS=Homo sapiens GN=EPPK1 PE=1 SV=2	10	6	7	5	1	5090	555.3	5.6
O00115	Deoxyribonuclease-2-alpha OS=Homo sapiens GN=DNASE2 PE=1 SV=2	10	3	3	3	1	360	39.6	8.05
P62312	U6 snRNA-associated Sm-like protein LSm6 OS=Homo sapiens GN=LSM6 PE=1 SV=1	10	1	1	1	1	80	9.1	9.58
P24311	Cytochrome c oxidase subunit 7B, mitochondrial OS=Homo sapiens GN=COX7B PE=1 SV=2	10	2	2	2	1	80	9.2	10.27
Q7L1Q6	Isoform 3 of Basic leucine zipper and W2 domain-containing protein 1 OS=Homo sapiens GN=BZW1	9.97783	3	4	3	1	451	51.2	6.62
Q9BTT6	Leucine-rich repeat-containing protein 1 OS=Homo sapiens GN=LRRC1 PE=1 SV=1	9.92366	3	3	1	1	524	59.2	5.02
Q15717	Isoform 2 of ELAV-like protein 1 OS=Homo sapiens GN=ELAVL1	9.91501	3	3	3	1	353	39	9.45
Q8IWA5	Isoform 2 of Choline transporter-like protein 2 OS=Homo sapiens GN=SLC44A2	9.84529	5	5	5	1	711	80.7	8.21
Q9NQG5	Regulation of nuclear pre-mRNA domain-containing protein 1B OS=Homo sapiens GN=RPRD1B PE=1 SV=1	9.81595	1	1	1	1	326	36.9	5.97
Q9H1X3	Isoform 3 of DnaJ homolog subfamily C member 25 OS=Homo sapiens GN=DNAJC25	9.80392	1	1	1	1	153	16.5	8.6
P56537	Eukaryotic translation initiation factor 6 OS=Homo sapiens GN=EIF6 PE=1 SV=1	9.79592	1	1	1	1	245	26.6	4.68
P52907	F-actin-capping protein subunit alpha-1 OS=Homo sapiens GN=CAPZA1 PE=1 SV=3	9.79021	2	2	2	1	286	32.9	5.69
Q96B26	Exosome complex component RRP43 OS=Homo sapiens GN=EXOSC8 PE=1 SV=1	9.78261	1	2	1	1	276	30	5.3
Q15046	Isoform Mitochondrial of Lysine--tRNA ligase OS=Homo sapiens GN=KARS	9.76	4	4	4	1	625	71.5	6.81
Q8WXF1	Paraspeckle component 1 OS=Homo sapiens GN=PSPC1 PE=1 SV=1	9.75143	3	3	3	1	523	58.7	6.67
Q15005	Signal peptidase complex subunit 2 OS=Homo sapiens GN=SPCS2 PE=1 SV=3	9.73451	1	1	1	1	226	25	8.47
Q9H4A6	Golgi phosphoprotein 3 OS=Homo sapiens GN=GOLPH3 PE=1 SV=1	9.73154	2	3	2	1	298	33.8	6.44
P78347	General transcription factor II-I OS=Homo sapiens GN=GTF2I PE=1 SV=2	9.71944	5	5	5	1	998	112.3	6.39
P62330	ADP-ribosylation factor 6 OS=Homo sapiens GN=ARF6 PE=1 SV=2	9.71429	2	2	1	1	175	20.1	8.95
Q9Y5J9	Mitochondrial import inner membrane translocase subunit Tim8 B OS=Homo sapiens GN=TIMM8B PE=1 SV=1	9.63855	1	1	1	1	83	9.3	5.12
P15586	N-acetylglucosamine-6-sulfatase OS=Homo sapiens GN=GNS PE=1 SV=3	9.60145	3	4	3	1	552	62	8.31
P29692	Isoform 2 of Elongation factor 1-delta OS=Homo sapiens GN=EEF1D	9.58269	4	4	4	1	647	71.4	6.42
Q15125	3-beta-hydroxysteroid-Delta(8),Delta(7)-isomerase OS=Homo sapiens GN=EBP PE=1 SV=3	9.56522	2	2	2	1	230	26.3	7.9
P37108	Signal recognition particle 14 kDa protein OS=Homo sapiens GN=SRP14 PE=1 SV=2	9.55882	1	1	1	1	136	14.6	10.04
O00217	NADH dehydrogenase [ubiquinone] iron-sulfur protein 8, mitochondrial OS=Homo sapiens GN=NDUFS8 PE=1 SV=1	9.52381	2	2	2	1	210	23.7	6.34
Q99735	Microsomal glutathione S-transferase 2 OS=Homo sapiens GN=MGST2 PE=1 SV=1	9.52381	1	2	1	1	147	16.6	9.55
Q9GZS3	WD repeat-containing protein 61 OS=Homo sapiens GN=WDR61 PE=1 SV=1	9.5082	1	1	1	1	305	33.6	5.47
Q9H845	Acyl-CoA dehydrogenase family member 9, mitochondrial OS=Homo sapiens GN=ACAD9 PE=1 SV=1	9.50081	4	4	4	1	621	68.7	7.96
Q9BQE5	Apolipoprotein L2 OS=Homo sapiens GN=APOL2 PE=1 SV=1	9.49555	1	2	1	1	337	37.1	6.74
Q9H2H9	Sodium-coupled neutral amino acid transporter 1 OS=Homo sapiens GN=SLC38A1 PE=1 SV=1	9.44559	3	3	3	1	487	54	7.02
O75208	Ubiquinone biosynthesis protein COQ9, mitochondrial OS=Homo sapiens GN=COQ9 PE=1 SV=1	9.43396	2	2	2	1	318	35.5	5.94
Q7Z7K0	COX assembly mitochondrial protein homolog OS=Homo sapiens GN=CMC1 PE=1 SV=1	9.43396	1	1	1	1	106	12.5	8.63
P55769	NHP2-like protein 1 OS=Homo sapiens GN=SNU13 PE=1 SV=3	9.375	1	1	1	1	128	14.2	8.46
Q92544	Transmembrane 9 superfamily member 4 OS=Homo sapiens GN=TM9SF4 PE=1 SV=2	9.34579	5	5	4	1	642	74.5	6.54
P62847	Isoform 4 of 40S ribosomal protein S24 OS=Homo sapiens GN=RPS24	9.34256	2	3	2	1	289	32.4	10.15
O15144	Actin-related protein 2/3 complex subunit 2 OS=Homo sapiens GN=ARPC2 PE=1 SV=1	9.33333	1	2	1	1	300	34.3	7.36
P23193	Transcription elongation factor A protein 1 OS=Homo sapiens GN=TCEA1 PE=1 SV=2	9.30233	1	1	1	1	301	33.9	8.38
Q9ULV4	Isoform 3 of Coronin-1C OS=Homo sapiens GN=CORO1C	9.29791	2	3	2	1	527	58.9	7.75
Q96RQ1	Endoplasmic reticulum-Golgi intermediate compartment protein 2 OS=Homo sapiens GN=ERGIC2 PE=1 SV=2	9.28382	2	2	2	1	377	42.5	6.77
P13473	Isoform LAMP-2C of Lysosome-associated membrane glycoprotein 2 OS=Homo sapiens GN=LAMP2	9.24574	4	4	4	1	411	45.1	5.91
P48643	T-complex protein 1 subunit epsilon OS=Homo sapiens GN=CCT5 PE=1 SV=1	9.24214	5	5	4	1	541	59.6	5.66
P20700	Lamin-B1 OS=Homo sapiens GN=LMNB1 PE=1 SV=2	9.21502	2	2	2	1	586	66.4	5.16
Q8IZ81	ELMO domain-containing protein 2 OS=Homo sapiens GN=ELMOD2 PE=1 SV=1	9.21502	1	1	1	1	293	34.9	8.05
P42224	Signal transducer and activator of transcription 1-alpha/beta OS=Homo sapiens GN=STAT1 PE=1 SV=2	9.2	5	6	5	1	750	87.3	6.05
O15400	Syntaxin-7 OS=Homo sapiens GN=STX7 PE=1 SV=4	9.1954	2	2	2	1	261	29.8	5.55
Q96IR7	4-hydroxyphenylpyruvate dioxygenase-like protein OS=Homo sapiens GN=HPDL PE=1 SV=1	9.16442	3	3	3	1	371	39.4	7.03
Q02790	Peptidyl-prolyl cis-trans isomerase FKBP4 OS=Homo sapiens GN=FKBP4 PE=1 SV=3	9.15033	2	4	2	1	459	51.8	5.43
Q9BRJ2	39S ribosomal protein L45, mitochondrial OS=Homo sapiens GN=MRPL45 PE=1 SV=2	9.15033	1	1	1	1	306	35.3	9.03
Q8N335	Glycerol-3-phosphate dehydrogenase 1-like protein OS=Homo sapiens GN=GPD1L PE=1 SV=1	9.11681	1	1	1	1	351	38.4	7.02
P81605	Isoform 2 of Dermcidin OS=Homo sapiens GN=DCD	9.09091	1	1	1	1	121	12.4	7.97
P43166	Carbonic anhydrase 7 OS=Homo sapiens GN=CA7 PE=1 SV=1	9.09091	1	1	1	1	264	29.6	7.42
Q9NQR4	Omega-amidase NIT2 OS=Homo sapiens GN=NIT2 PE=1 SV=1	9.05797	1	1	1	1	276	30.6	7.21
Q9GZT6	Coiled-coil domain-containing protein 90B, mitochondrial OS=Homo sapiens GN=CCDC90B PE=1 SV=2	9.05512	1	2	1	1	254	29.5	7.55
Q9HBH1	Peptide deformylase, mitochondrial OS=Homo sapiens GN=PDF PE=1 SV=1	9.0535	1	1	1	1	243	27	9.16
Q9BVC6	Transmembrane protein 109 OS=Homo sapiens GN=TMEM109 PE=1 SV=1	9.0535	2	2	2	1	243	26.2	10.48
Q9BRV3	Sugar transporter SWEET1 OS=Homo sapiens GN=SLC50A1 PE=2 SV=1	9.04977	1	1	1	1	221	25	8.54
Q99757	Thioredoxin, mitochondrial OS=Homo sapiens GN=TXN2 PE=1 SV=2	9.03614	1	1	1	1	166	18.4	8.29
P10620	Microsomal glutathione S-transferase 1 OS=Homo sapiens GN=MGST1 PE=1 SV=1	9.03226	2	3	2	1	155	17.6	9.39
Q9NRV9	Heme-binding protein 1 OS=Homo sapiens GN=HEBP1 PE=1 SV=1	8.99471	1	2	1	1	189	21.1	5.8
P62841	40S ribosomal protein S15 OS=Homo sapiens GN=RPS15 PE=1 SV=2	8.96552	1	1	1	1	145	17	10.39
Q96RP9	Isoform 2 of Elongation factor G, mitochondrial OS=Homo sapiens GN=GFM1	8.96104	7	7	7	1	770	85.8	7.18
Q14318	Isoform 2 of Peptidyl-prolyl cis-trans isomerase FKBP8 OS=Homo sapiens GN=FKBP8	8.95884	2	2	2	1	413	44.6	4.84
P04632	Calpain small subunit 1 OS=Homo sapiens GN=CAPNS1 PE=1 SV=1	8.95522	1	1	1	1	268	28.3	5.2
Q92504	Zinc transporter SLC39A7 OS=Homo sapiens GN=SLC39A7 PE=1 SV=2	8.95522	2	2	2	1	469	50.1	6.87
P62273	Isoform 2 of 40S ribosomal protein S29 OS=Homo sapiens GN=RPS29	8.95522	1	1	1	1	67	8.1	10.02
P57735	Ras-related protein Rab-25 OS=Homo sapiens GN=RAB25 PE=1 SV=2	8.92019	2	2	1	1	213	23.5	5.96
Q9UKY7	Protein CDV3 homolog OS=Homo sapiens GN=CDV3 PE=1 SV=1	8.91473	1	1	1	1	258	27.3	6.4
Q7Z429	Protein lifeguard 1 OS=Homo sapiens GN=GRINA PE=2 SV=1	8.89488	1	1	1	1	371	41.2	5.34
Q9BQG0	Isoform 2 of Myb-binding protein 1A OS=Homo sapiens GN=MYBBP1A	8.85886	9	10	9	1	1332	149.3	9.28
Q6YN16	Hydroxysteroid dehydrogenase-like protein 2 OS=Homo sapiens GN=HSDL2 PE=1 SV=1	8.85167	2	3	2	1	418	45.4	7.99
Q9BSF4	Uncharacterized protein C19orf52 OS=Homo sapiens GN=C19orf52 PE=1 SV=2	8.84615	1	1	1	1	260	29.2	8.09
Q13442	28 kDa heat- and acid-stable phosphoprotein OS=Homo sapiens GN=PDAP1 PE=1 SV=1	8.83978	1	1	1	1	181	20.6	8.87
Q9BRP8	Partner of Y14 and mago OS=Homo sapiens GN=PYM1 PE=1 SV=1	8.82353	1	2	1	1	204	22.6	9.45
Q53H12	Acylglycerol kinase, mitochondrial OS=Homo sapiens GN=AGK PE=1 SV=2	8.76777	2	2	2	1	422	47.1	8.09
O75131	Copine-3 OS=Homo sapiens GN=CPNE3 PE=1 SV=1	8.75233	3	3	3	1	537	60.1	5.85
Q9NQ50	39S ribosomal protein L40, mitochondrial OS=Homo sapiens GN=MRPL40 PE=1 SV=1	8.73786	1	1	1	1	206	24.5	9.63
Q96AE4	Isoform 2 of Far upstream element-binding protein 1 OS=Homo sapiens GN=FUBP1	8.72894	5	5	4	1	653	68.6	7.31
Q71RG4	Transmembrane and ubiquitin-like domain-containing protein 2 OS=Homo sapiens GN=TMUB2 PE=1 SV=2	8.72274	1	1	1	1	321	33.8	5.03
O95881	Thioredoxin domain-containing protein 12 OS=Homo sapiens GN=TXNDC12 PE=1 SV=1	8.72093	1	1	1	1	172	19.2	5.4
P17858	Isoform 2 of ATP-dependent 6-phosphofructokinase, liver type OS=Homo sapiens GN=PFKL	8.70617	4	4	4	1	827	90.1	7.83
Q15404	Ras suppressor protein 1 OS=Homo sapiens GN=RSU1 PE=1 SV=3	8.66426	1	1	1	1	277	31.5	8.65
Q9Y230	RuvB-like 2 OS=Homo sapiens GN=RUVBL2 PE=1 SV=3	8.63931	3	3	3	1	463	51.1	5.64
Q9NRX2	39S ribosomal protein L17, mitochondrial OS=Homo sapiens GN=MRPL17 PE=1 SV=1	8.57143	1	1	1	1	175	20	10.11
O43181	NADH dehydrogenase [ubiquinone] iron-sulfur protein 4, mitochondrial OS=Homo sapiens GN=NDUFS4 PE=1 SV=1	8.57143	1	1	1	1	175	20.1	10.3
Q9NPJ3	Acyl-coenzyme A thioesterase 13 OS=Homo sapiens GN=ACOT13 PE=1 SV=1	8.57143	1	1	1	1	140	15	9.14
O94905	Erlin-2 OS=Homo sapiens GN=ERLIN2 PE=1 SV=1	8.55457	2	2	2	1	339	37.8	5.62
Q04941	Proteolipid protein 2 OS=Homo sapiens GN=PLP2 PE=1 SV=1	8.55263	1	1	1	1	152	16.7	7.24
Q14696	LDLR chaperone MESD OS=Homo sapiens GN=MESDC2 PE=1 SV=2	8.54701	1	1	1	1	234	26.1	7.78
O15533	Isoform 3 of Tapasin OS=Homo sapiens GN=TAPBP	8.53175	2	2	2	1	504	53.9	7.23
Q96S66	Chloride channel CLIC-like protein 1 OS=Homo sapiens GN=CLCC1 PE=1 SV=1	8.52995	2	3	2	1	551	62	5.55
P25325	Isoform 2 of 3-mercaptopyruvate sulfurtransferase OS=Homo sapiens GN=MPST	8.51735	1	1	1	1	317	35.2	6.61
O76094	Signal recognition particle subunit SRP72 OS=Homo sapiens GN=SRP72 PE=1 SV=3	8.49478	3	3	3	1	671	74.6	9.26
Q8N129	Protein canopy homolog 4 OS=Homo sapiens GN=CNPY4 PE=2 SV=1	8.46774	1	1	1	1	248	28.3	4.64
Q9Y277	Isoform 2 of Voltage-dependent anion-selective channel protein 3 OS=Homo sapiens GN=VDAC3	8.4507	3	3	2	1	284	30.8	8.66
Q9Y320	Thioredoxin-related transmembrane protein 2 OS=Homo sapiens GN=TMX2 PE=1 SV=1	8.44595	1	1	1	1	296	34	8.69
Q9NZ01	Very-long-chain enoyl-CoA reductase OS=Homo sapiens GN=TECR PE=1 SV=1	8.44156	3	3	3	1	308	36	9.45
Q96EY7	Pentatricopeptide repeat domain-containing protein 3, mitochondrial OS=Homo sapiens GN=PTCD3 PE=1 SV=3	8.418	4	4	4	1	689	78.5	6.42
P00846	ATP synthase subunit a OS=Homo sapiens GN=MT-ATP6 PE=1 SV=1	8.40708	2	2	2	1	226	24.8	10.1
O14980	Exportin-1 OS=Homo sapiens GN=XPO1 PE=1 SV=1	8.40336	4	4	4	1	1071	123.3	6.06
Q15771	Ras-related protein Rab-30 OS=Homo sapiens GN=RAB30 PE=1 SV=2	8.37438	2	4	1	1	203	23	4.97
O75431	Metaxin-2 OS=Homo sapiens GN=MTX2 PE=1 SV=1	8.36502	1	1	1	1	263	29.7	6.29
O95167	NADH dehydrogenase [ubiquinone] 1 alpha subcomplex subunit 3 OS=Homo sapiens GN=NDUFA3 PE=1 SV=1	8.33333	1	1	1	1	84	9.3	8.46
Q7Z434	Mitochondrial antiviral-signaling protein OS=Homo sapiens GN=MAVS PE=1 SV=2	8.33333	3	3	3	1	540	56.5	5.52
P18031	Tyrosine-protein phosphatase non-receptor type 1 OS=Homo sapiens GN=PTPN1 PE=1 SV=1	8.27586	3	3	3	1	435	49.9	6.27
P54725	UV excision repair protein RAD23 homolog A OS=Homo sapiens GN=RAD23A PE=1 SV=1	8.26446	1	1	1	1	363	39.6	4.58
P08621	U1 small nuclear ribonucleoprotein 70 kDa OS=Homo sapiens GN=SNRNP70 PE=1 SV=2	8.23799	3	3	3	1	437	51.5	9.94
Q99808	Isoform 2 of Equilibrative nucleoside transporter 1 OS=Homo sapiens GN=SLC29A1	8.2243	3	3	3	1	535	58.9	8.15
Q9Y224	UPF0568 protein C14orf166 OS=Homo sapiens GN=C14orf166 PE=1 SV=1	8.19672	1	1	1	1	244	28.1	6.65
Q5T653	39S ribosomal protein L2, mitochondrial OS=Homo sapiens GN=MRPL2 PE=1 SV=2	8.19672	1	1	1	1	305	33.3	11.3
Q8N2F6	Armadillo repeat-containing protein 10 OS=Homo sapiens GN=ARMC10 PE=1 SV=1	8.16327	2	2	2	1	343	37.5	6.61
P56545	Isoform 2 of C-terminal-binding protein 2 OS=Homo sapiens GN=CTBP2	8.12183	3	3	3	1	985	106.1	8.02
P25787	Proteasome subunit alpha type-2 OS=Homo sapiens GN=PSMA2 PE=1 SV=2	8.11966	1	1	1	1	234	25.9	7.43
Q9Y2Z9	Ubiquinone biosynthesis monooxygenase COQ6, mitochondrial OS=Homo sapiens GN=COQ6 PE=1 SV=2	8.11966	1	2	1	1	468	50.8	7.3
P67936	Isoform 2 of Tropomyosin alpha-4 chain OS=Homo sapiens GN=TPM4	8.09859	2	2	2	1	284	32.7	4.73
P17987	T-complex protein 1 subunit alpha OS=Homo sapiens GN=TCP1 PE=1 SV=1	8.09353	3	4	3	1	556	60.3	6.11
Q9UHA4	Ragulator complex protein LAMTOR3 OS=Homo sapiens GN=LAMTOR3 PE=1 SV=1	8.06452	1	1	1	1	124	13.6	7.34
Q15056	Eukaryotic translation initiation factor 4H OS=Homo sapiens GN=EIF4H PE=1 SV=5	8.06452	2	2	2	1	248	27.4	7.23
Q04637	Isoform 9 of Eukaryotic translation initiation factor 4 gamma 1 OS=Homo sapiens GN=EIF4G1	8.03238	9	10	9	1	1606	176.1	5.34
P15311	Ezrin OS=Homo sapiens GN=EZR PE=1 SV=4	8.02048	4	6	4	1	586	69.4	6.27
Q14534	Squalene monooxygenase OS=Homo sapiens GN=SQLE PE=1 SV=3	8.01394	3	4	3	1	574	63.9	8.63
O60884	DnaJ homolog subfamily A member 2 OS=Homo sapiens GN=DNAJA2 PE=1 SV=1	8.00971	1	1	1	1	412	45.7	6.48
Q9P032	NADH dehydrogenase [ubiquinone] 1 alpha subcomplex assembly factor 4 OS=Homo sapiens GN=NDUFAF4 PE=1 SV=1	8	1	1	1	1	175	20.3	8.82
Q9BQ61	Uncharacterized protein C19orf43 OS=Homo sapiens GN=C19orf43 PE=1 SV=1	7.95455	1	1	1	1	176	18.4	9.44
Q9H2D1	Mitochondrial folate transporter/carrier OS=Homo sapiens GN=SLC25A32 PE=1 SV=2	7.93651	1	1	1	1	315	35.4	9.45
P38159	RNA-binding motif protein, X chromosome OS=Homo sapiens GN=RBMX PE=1 SV=3	7.92839	3	3	3	1	391	42.3	10.05
P29728	2'-5'-oligoadenylate synthase 2 OS=Homo sapiens GN=OAS2 PE=1 SV=3	7.92768	2	2	2	1	719	82.4	8.25
O43143	Pre-mRNA-splicing factor ATP-dependent RNA helicase DHX15 OS=Homo sapiens GN=DHX15 PE=1 SV=2	7.92453	4	4	4	1	795	90.9	7.46
Q9UBF2	Coatomer subunit gamma-2 OS=Homo sapiens GN=COPG2 PE=1 SV=1	7.92193	4	5	3	1	871	97.6	5.81
Q9GZY8	Mitochondrial fission factor OS=Homo sapiens GN=MFF PE=1 SV=1	7.89474	1	1	1	1	342	38.4	8.95
P28066	Proteasome subunit alpha type-5 OS=Homo sapiens GN=PSMA5 PE=1 SV=3	7.88382	1	1	1	1	241	26.4	4.79
P23381	Tryptophan--tRNA ligase, cytoplasmic OS=Homo sapiens GN=WARS PE=1 SV=2	7.85563	2	3	2	1	471	53.1	6.23
P31942	Heterogeneous nuclear ribonucleoprotein H3 OS=Homo sapiens GN=HNRNPH3 PE=1 SV=2	7.80347	2	3	2	1	346	36.9	6.87
P03891	NADH-ubiquinone oxidoreductase chain 2 OS=Homo sapiens GN=MT-ND2 PE=1 SV=2	7.78098	1	1	1	1	347	38.9	9.83
Q92542	Nicastrin OS=Homo sapiens GN=NCSTN PE=1 SV=2	7.7574	2	2	2	1	709	78.4	5.99
Q14498	RNA-binding protein 39 OS=Homo sapiens GN=RBM39 PE=1 SV=2	7.73585	2	2	2	1	530	59.3	10.1
Q9HC07	Transmembrane protein 165 OS=Homo sapiens GN=TMEM165 PE=1 SV=1	7.71605	1	1	1	1	324	34.9	7.02
O43402	ER membrane protein complex subunit 8 OS=Homo sapiens GN=EMC8 PE=1 SV=1	7.61905	1	1	1	1	210	23.8	6.4
Q96EP5	DAZ-associated protein 1 OS=Homo sapiens GN=DAZAP1 PE=1 SV=1	7.61671	2	2	2	1	407	43.4	8.56
Q08945	FACT complex subunit SSRP1 OS=Homo sapiens GN=SSRP1 PE=1 SV=1	7.61636	2	2	2	1	709	81	6.87
P05455	Lupus La protein OS=Homo sapiens GN=SSB PE=1 SV=2	7.59804	3	3	3	1	408	46.8	7.12
Q6PI48	Aspartate--tRNA ligase, mitochondrial OS=Homo sapiens GN=DARS2 PE=1 SV=1	7.5969	4	4	4	1	645	73.5	8.02
P57105	Synaptojanin-2-binding protein OS=Homo sapiens GN=SYNJ2BP PE=1 SV=2	7.58621	1	1	1	1	145	15.9	6.3
Q3SXM5	Inactive hydroxysteroid dehydrogenase-like protein 1 OS=Homo sapiens GN=HSDL1 PE=1 SV=3	7.57576	1	1	1	1	330	37	8.72
Q9UI14	Prenylated Rab acceptor protein 1 OS=Homo sapiens GN=RABAC1 PE=1 SV=1	7.56757	1	1	1	1	185	20.6	7.34
Q03518	Antigen peptide transporter 1 OS=Homo sapiens GN=TAP1 PE=1 SV=2	7.5495	2	4	2	1	808	87.2	8.02
P40227	T-complex protein 1 subunit zeta OS=Homo sapiens GN=CCT6A PE=1 SV=3	7.53296	3	3	3	1	531	58	6.68
Q13445	Transmembrane emp24 domain-containing protein 1 OS=Homo sapiens GN=TMED1 PE=1 SV=1	7.48899	1	1	1	1	227	25.2	4.48
O00299	Chloride intracellular channel protein 1 OS=Homo sapiens GN=CLIC1 PE=1 SV=4	7.46888	1	1	1	1	241	26.9	5.17
P09497	Clathrin light chain B OS=Homo sapiens GN=CLTB PE=1 SV=1	7.42358	2	2	2	1	229	25.2	4.64
Q99943	1-acyl-sn-glycerol-3-phosphate acyltransferase alpha OS=Homo sapiens GN=AGPAT1 PE=1 SV=2	7.42049	1	1	1	1	283	31.7	9.38
P45954	Short/branched chain specific acyl-CoA dehydrogenase, mitochondrial OS=Homo sapiens GN=ACADSB PE=1 SV=1	7.40741	2	2	2	1	432	47.5	6.99
Q6PKG0	La-related protein 1 OS=Homo sapiens GN=LARP1 PE=1 SV=2	7.39051	5	5	5	1	1096	123.4	8.82
Q9BYD6	39S ribosomal protein L1, mitochondrial OS=Homo sapiens GN=MRPL1 PE=1 SV=2	7.38462	1	1	1	1	325	36.9	8.78
P61077	Isoform 3 of Ubiquitin-conjugating enzyme E2 D3 OS=Homo sapiens GN=UBE2D3	7.38255	1	1	1	1	149	16.9	7.74
Q9BYN8	28S ribosomal protein S26, mitochondrial OS=Homo sapiens GN=MRPS26 PE=1 SV=1	7.31707	2	2	2	1	205	24.2	10.39
P13674	Prolyl 4-hydroxylase subunit alpha-1 OS=Homo sapiens GN=P4HA1 PE=1 SV=2	7.30337	3	5	3	1	534	61	6.01
Q9UFN0	Protein NipSnap homolog 3A OS=Homo sapiens GN=NIPSNAP3A PE=1 SV=2	7.28745	1	1	1	1	247	28.4	9.16
P35270	Sepiapterin reductase OS=Homo sapiens GN=SPR PE=1 SV=1	7.27969	1	1	1	1	261	28	8.05
P07099	Epoxide hydrolase 1 OS=Homo sapiens GN=EPHX1 PE=1 SV=1	7.25275	3	3	3	1	455	52.9	7.25
Q969Y2	Isoform 2 of tRNA modification GTPase GTPBP3, mitochondrial OS=Homo sapiens GN=GTPBP3	7.25191	1	1	1	1	524	55.5	6.83
P26196	Probable ATP-dependent RNA helicase DDX6 OS=Homo sapiens GN=DDX6 PE=1 SV=2	7.24638	2	2	2	1	483	54.4	8.66
Q9NX62	Inositol monophosphatase 3 OS=Homo sapiens GN=IMPAD1 PE=1 SV=1	7.24234	1	1	1	1	359	38.7	6.86
Q13405	39S ribosomal protein L49, mitochondrial OS=Homo sapiens GN=MRPL49 PE=1 SV=1	7.22892	1	1	1	1	166	19.2	9.45
P07741	Adenine phosphoribosyltransferase OS=Homo sapiens GN=APRT PE=1 SV=2	7.22222	1	2	1	1	180	19.6	6.02
Q96N66	Lysophospholipid acyltransferase 7 OS=Homo sapiens GN=MBOAT7 PE=1 SV=2	7.20339	2	2	2	1	472	52.7	8.97
P13489	Ribonuclease inhibitor OS=Homo sapiens GN=RNH1 PE=1 SV=2	7.15835	1	1	1	1	461	49.9	4.82
P23786	Carnitine O-palmitoyltransferase 2, mitochondrial OS=Homo sapiens GN=CPT2 PE=1 SV=2	7.14286	3	3	3	1	658	73.7	8.18
P12830	Cadherin-1 OS=Homo sapiens GN=CDH1 PE=1 SV=3	7.14286	3	5	3	1	882	97.4	4.73
Q9Y2W6	Tudor and KH domain-containing protein OS=Homo sapiens GN=TDRKH PE=1 SV=2	7.13012	2	3	2	1	561	62	5.02
P02794	Ferritin heavy chain OS=Homo sapiens GN=FTH1 PE=1 SV=2	7.10383	1	1	1	1	183	21.2	5.55
Q5J8M3	ER membrane protein complex subunit 4 OS=Homo sapiens GN=EMC4 PE=1 SV=2	7.10383	1	1	1	1	183	20.1	8.62
P54727	UV excision repair protein RAD23 homolog B OS=Homo sapiens GN=RAD23B PE=1 SV=1	7.09046	1	1	1	1	409	43.1	4.84
Q9UNL2	Isoform 2 of Translocon-associated protein subunit gamma OS=Homo sapiens GN=SSR3	7.07071	1	1	1	1	198	22.6	9.63
Q8WTV0	Scavenger receptor class B member 1 OS=Homo sapiens GN=SCARB1 PE=1 SV=1	7.06522	3	3	3	1	552	60.8	8.24
Q9NX63	MICOS complex subunit MIC19 OS=Homo sapiens GN=CHCHD3 PE=1 SV=1	7.04846	1	1	1	1	227	26.1	8.28
P24752	Acetyl-CoA acetyltransferase, mitochondrial OS=Homo sapiens GN=ACAT1 PE=1 SV=1	7.02576	2	3	2	1	427	45.2	8.85
Q9NRP0	Isoform 2 of Oligosaccharyltransferase complex subunit OSTC OS=Homo sapiens GN=OSTC	7.01754	1	2	1	1	171	19.2	9.19
Q9Y2W1	Thyroid hormone receptor-associated protein 3 OS=Homo sapiens GN=THRAP3 PE=1 SV=2	7.01571	5	5	5	1	955	108.6	10.15
Q7Z7H8	Isoform 2 of 39S ribosomal protein L10, mitochondrial OS=Homo sapiens GN=MRPL10	7.01107	1	2	1	1	271	30.3	9.25
Q8WVM8	Sec1 family domain-containing protein 1 OS=Homo sapiens GN=SCFD1 PE=1 SV=4	7.00935	2	3	2	1	642	72.3	6.27
Q86V81	THO complex subunit 4 OS=Homo sapiens GN=ALYREF PE=1 SV=3	7.00389	1	2	1	1	257	26.9	11.15
Q13243	Serine/arginine-rich splicing factor 5 OS=Homo sapiens GN=SRSF5 PE=1 SV=1	6.98529	2	2	2	1	272	31.2	11.59
P62306	Small nuclear ribonucleoprotein F OS=Homo sapiens GN=SNRPF PE=1 SV=1	6.97674	1	1	1	1	86	9.7	4.67
Q9BXP5	Serrate RNA effector molecule homolog OS=Homo sapiens GN=SRRT PE=1 SV=1	6.96347	2	3	2	1	876	100.6	5.96
Q9UGM6	Tryptophan--tRNA ligase, mitochondrial OS=Homo sapiens GN=WARS2 PE=1 SV=1	6.94444	1	1	1	1	360	40.1	9.28
Q9NP81	Isoform 2 of Serine--tRNA ligase, mitochondrial OS=Homo sapiens GN=SARS2	6.92308	2	2	2	1	520	58	7.36
Q6UXD5	Seizure 6-like protein 2 OS=Homo sapiens GN=SEZ6L2 PE=1 SV=2	6.92308	2	2	2	1	910	97.5	4.89
Q14978	Isoform Beta of Nucleolar and coiled-body phosphoprotein 1 OS=Homo sapiens GN=NOLC1	6.91114	4	7	4	1	709	74.7	9.47
Q9H3M7	Thioredoxin-interacting protein OS=Homo sapiens GN=TXNIP PE=1 SV=1	6.90537	2	2	2	1	391	43.6	7.5
Q96CP7	Calfacilitin OS=Homo sapiens GN=TLCD1 PE=2 SV=1	6.88259	1	1	1	1	247	28.5	9.47
Q14165	Malectin OS=Homo sapiens GN=MLEC PE=1 SV=1	6.84932	2	2	2	1	292	32.2	5.41
P23368	NAD-dependent malic enzyme, mitochondrial OS=Homo sapiens GN=ME2 PE=1 SV=1	6.84932	1	1	1	1	584	65.4	7.61
Q96A33	Coiled-coil domain-containing protein 47 OS=Homo sapiens GN=CCDC47 PE=1 SV=1	6.8323	2	3	2	1	483	55.8	4.87
P53396	ATP-citrate synthase OS=Homo sapiens GN=ACLY PE=1 SV=3	6.81199	5	5	5	1	1101	120.8	7.33
Q14980	Nuclear mitotic apparatus protein 1 OS=Homo sapiens GN=NUMA1 PE=1 SV=2	6.80851	7	7	7	1	2115	238.1	5.78
Q5JTZ9	Alanine--tRNA ligase, mitochondrial OS=Homo sapiens GN=AARS2 PE=1 SV=1	6.80203	3	3	3	1	985	107.3	6.27
Q8WY22	BRI3-binding protein OS=Homo sapiens GN=BRI3BP PE=1 SV=1	6.77291	1	1	1	1	251	27.8	9.44
Q15691	Microtubule-associated protein RP/EB family member 1 OS=Homo sapiens GN=MAPRE1 PE=1 SV=3	6.71642	1	1	1	1	268	30	5.14
P49841	Isoform 2 of Glycogen synthase kinase-3 beta OS=Homo sapiens GN=GSK3B	6.69746	1	1	1	1	433	48	8.78
Q9H078	Caseinolytic peptidase B protein homolog OS=Homo sapiens GN=CLPB PE=1 SV=1	6.64781	3	3	3	1	707	78.7	9.01
P46060	Ran GTPase-activating protein 1 OS=Homo sapiens GN=RANGAP1 PE=1 SV=1	6.64395	2	2	2	1	587	63.5	4.68
O43809	Cleavage and polyadenylation specificity factor subunit 5 OS=Homo sapiens GN=NUDT21 PE=1 SV=1	6.60793	1	1	1	1	227	26.2	8.82
O94919	Endonuclease domain-containing 1 protein OS=Homo sapiens GN=ENDOD1 PE=1 SV=2	6.6	1	1	1	1	500	55	5.71
Q8NCW5	NAD(P)H-hydrate epimerase OS=Homo sapiens GN=NAXE PE=1 SV=2	6.59722	1	2	1	1	288	31.7	7.66
P15559	NAD(P)H dehydrogenase [quinone] 1 OS=Homo sapiens GN=NQO1 PE=1 SV=1	6.56934	1	1	1	1	274	30.8	8.88
P34932	Heat shock 70 kDa protein 4 OS=Homo sapiens GN=HSPA4 PE=1 SV=4	6.54762	3	4	3	1	840	94.3	5.19
Q15637	Isoform 5 of Splicing factor 1 OS=Homo sapiens GN=SF1	6.53789	3	3	3	1	673	71.7	9.58
Q2T9J0	Peroxisomal leader peptide-processing protease OS=Homo sapiens GN=TYSND1 PE=1 SV=3	6.5371	1	1	1	1	566	59.3	6.2
Q8WWC4	Uncharacterized protein C2orf47, mitochondrial OS=Homo sapiens GN=C2orf47 PE=1 SV=1	6.52921	2	2	2	1	291	32.5	9.17
Q86WA6	Valacyclovir hydrolase OS=Homo sapiens GN=BPHL PE=1 SV=1	6.52921	1	1	1	1	291	32.5	9.14
O95433	Activator of 90 kDa heat shock protein ATPase homolog 1 OS=Homo sapiens GN=AHSA1 PE=1 SV=1	6.50888	1	1	1	1	338	38.3	5.53
P50336	Protoporphyrinogen oxidase OS=Homo sapiens GN=PPOX PE=1 SV=1	6.49895	1	1	1	1	477	50.7	8.16
P11597	Cholesteryl ester transfer protein OS=Homo sapiens GN=CETP PE=1 SV=2	6.49087	1	1	1	1	493	54.7	6.09
P82932	28S ribosomal protein S6, mitochondrial OS=Homo sapiens GN=MRPS6 PE=1 SV=3	6.4	1	1	1	1	125	14.2	9.26
Q14011	Cold-inducible RNA-binding protein OS=Homo sapiens GN=CIRBP PE=1 SV=1	6.39535	1	1	1	1	172	18.6	9.51
P68400	Casein kinase II subunit alpha OS=Homo sapiens GN=CSNK2A1 PE=1 SV=1	6.39386	2	2	1	1	391	45.1	7.74
P30837	Aldehyde dehydrogenase X, mitochondrial OS=Homo sapiens GN=ALDH1B1 PE=1 SV=3	6.38298	2	2	2	1	517	57.2	6.8
Q14677	Isoform 3 of Clathrin interactor 1 OS=Homo sapiens GN=CLINT1	6.37636	3	3	3	1	643	70.3	6.58
O15551	Claudin-3 OS=Homo sapiens GN=CLDN3 PE=1 SV=1	6.36364	1	1	1	1	220	23.3	8.05
Q9Y6Q5	Isoform 2 of AP-1 complex subunit mu-2 OS=Homo sapiens GN=AP1M2	6.35294	2	2	2	1	425	48.2	7.91
P53701	Cytochrome c-type heme lyase OS=Homo sapiens GN=HCCS PE=1 SV=1	6.34328	1	1	1	1	268	30.6	6.68
Q9BWD1	Isoform 2 of Acetyl-CoA acetyltransferase, cytosolic OS=Homo sapiens GN=ACAT2	6.33803	1	1	1	1	426	44.6	8.46
P38606	V-type proton ATPase catalytic subunit A OS=Homo sapiens GN=ATP6V1A PE=1 SV=2	6.32091	1	1	1	1	617	68.3	5.52
P82933	28S ribosomal protein S9, mitochondrial OS=Homo sapiens GN=MRPS9 PE=1 SV=2	6.31313	2	2	2	1	396	45.8	9.51
O14521	Succinate dehydrogenase [ubiquinone] cytochrome b small subunit, mitochondrial OS=Homo sapiens GN=SDHD PE=1 SV=1	6.28931	1	1	1	1	159	17	8.63
Q96QK1	Vacuolar protein sorting-associated protein 35 OS=Homo sapiens GN=VPS35 PE=1 SV=2	6.28141	4	4	4	1	796	91.6	5.49
Q9BQ95	Evolutionarily conserved signaling intermediate in Toll pathway, mitochondrial OS=Homo sapiens GN=ECSIT PE=1 SV=1	6.2645	1	1	1	1	431	49.1	6.29
Q9P2R7	Succinate--CoA ligase [ADP-forming] subunit beta, mitochondrial OS=Homo sapiens GN=SUCLA2 PE=1 SV=3	6.2635	3	3	3	1	463	50.3	7.42
O95562	Vesicle transport protein SFT2B OS=Homo sapiens GN=SFT2D2 PE=1 SV=1	6.25	1	1	1	1	160	17.8	9.13
Q969L2	Protein MAL2 OS=Homo sapiens GN=MAL2 PE=1 SV=1	6.25	1	1	1	1	176	19.1	6.24
P02768	Serum albumin OS=Homo sapiens GN=ALB PE=1 SV=2	6.23974	4	6	4	1	609	69.3	6.28
Q9UQ35	Serine/arginine repetitive matrix protein 2 OS=Homo sapiens GN=SRRM2 PE=1 SV=2	6.21366	10	11	10	1	2752	299.4	12.06
O15126	Secretory carrier-associated membrane protein 1 OS=Homo sapiens GN=SCAMP1 PE=1 SV=2	6.21302	2	2	2	1	338	37.9	7.42
O14979	Heterogeneous nuclear ribonucleoprotein D-like OS=Homo sapiens GN=HNRNPDL PE=1 SV=3	6.19048	3	3	1	1	420	46.4	9.57
Q15233	Non-POU domain-containing octamer-binding protein OS=Homo sapiens GN=NONO PE=1 SV=4	6.15711	3	3	2	1	471	54.2	8.95
Q8N1F1	Putative uncharacterized protein LRRC75A-AS1, mitochondrial OS=Homo sapiens GN=LRRC75A-AS1 PE=5 SV=1	6.15385	1	1	1	1	130	13.8	9.26
Q9BW92	Threonine--tRNA ligase, mitochondrial OS=Homo sapiens GN=TARS2 PE=1 SV=1	6.12813	2	2	2	1	718	81	7.3
Q9C0C4	Semaphorin-4C OS=Homo sapiens GN=SEMA4C PE=1 SV=2	6.12245	2	2	2	1	833	92.6	7.28
P11498	Pyruvate carboxylase, mitochondrial OS=Homo sapiens GN=PC PE=1 SV=2	6.11205	3	3	3	1	1178	129.6	6.84
Q9BYD3	39S ribosomal protein L4, mitochondrial OS=Homo sapiens GN=MRPL4 PE=1 SV=1	6.10932	1	1	1	1	311	34.9	9.72
O75494	Serine/arginine-rich splicing factor 10 OS=Homo sapiens GN=SRSF10 PE=1 SV=1	6.10687	1	2	1	1	262	31.3	11.27
Q9NWU1	3-oxoacyl-[acyl-carrier-protein] synthase, mitochondrial OS=Homo sapiens GN=OXSM PE=1 SV=1	6.10022	1	1	1	1	459	48.8	7.66
P54802	Alpha-N-acetylglucosaminidase OS=Homo sapiens GN=NAGLU PE=1 SV=2	6.05653	2	2	2	1	743	82.2	6.65
P09496	Clathrin light chain A OS=Homo sapiens GN=CLTA PE=1 SV=1	6.04839	2	2	2	1	248	27.1	4.51
P00395	Cytochrome c oxidase subunit 1 OS=Homo sapiens GN=MT-CO1 PE=1 SV=1	6.04288	1	4	1	1	513	57	6.7
P02647	Apolipoprotein A-I OS=Homo sapiens GN=APOA1 PE=1 SV=1	5.99251	1	2	1	1	267	30.8	5.76
Q13217	DnaJ homolog subfamily C member 3 OS=Homo sapiens GN=DNAJC3 PE=1 SV=1	5.95238	1	1	1	1	504	57.5	6.15
Q16625	Occludin OS=Homo sapiens GN=OCLN PE=1 SV=1	5.9387	2	2	2	1	522	59.1	6.09
Q92947	Glutaryl-CoA dehydrogenase, mitochondrial OS=Homo sapiens GN=GCDH PE=1 SV=1	5.93607	1	1	1	1	438	48.1	8.06
P0CG08	Golgi pH regulator B OS=Homo sapiens GN=GPR89B PE=1 SV=1	5.93407	1	1	1	1	455	52.9	9.28
Q8IVS2	Malonyl-CoA-acyl carrier protein transacylase, mitochondrial OS=Homo sapiens GN=MCAT PE=1 SV=2	5.89744	1	1	1	1	390	42.9	8.72
Q7Z3Y8	Keratin, type I cytoskeletal 27 OS=Homo sapiens GN=KRT27 PE=1 SV=2	5.88235	3	4	1	1	459	49.8	5.05
Q9Y2Q9	28S ribosomal protein S28, mitochondrial OS=Homo sapiens GN=MRPS28 PE=1 SV=1	5.88235	1	1	1	1	187	20.8	9.1
P07384	Calpain-1 catalytic subunit OS=Homo sapiens GN=CAPN1 PE=1 SV=1	5.88235	2	2	2	1	714	81.8	5.67
Q8WUM4	Isoform 2 of Programmed cell death 6-interacting protein OS=Homo sapiens GN=PDCD6IP	5.84192	2	2	2	1	873	96.7	6.52
Q15392	Delta(24)-sterol reductase OS=Homo sapiens GN=DHCR24 PE=1 SV=2	5.81395	3	3	3	1	516	60.1	8.16
P42785	Isoform 2 of Lysosomal Pro-X carboxypeptidase OS=Homo sapiens GN=PRCP	5.80271	2	2	2	1	517	58.1	7.4
O15235	28S ribosomal protein S12, mitochondrial OS=Homo sapiens GN=MRPS12 PE=1 SV=1	5.7971	1	1	1	1	138	15.2	10.29
Q9C0D9	Ethanolaminephosphotransferase 1 OS=Homo sapiens GN=EPT1 PE=1 SV=3	5.79345	1	1	1	1	397	45.2	6.6
P10909	Isoform 2 of Clusterin OS=Homo sapiens GN=CLU	5.78842	2	3	2	1	501	57.8	6.68
P16278	Beta-galactosidase OS=Homo sapiens GN=GLB1 PE=1 SV=2	5.76071	2	2	2	1	677	76	6.57
A0FGR8	Isoform 6 of Extended synaptotagmin-2 OS=Homo sapiens GN=ESYT2	5.73248	5	5	4	1	942	104.6	9.33
P41091	Eukaryotic translation initiation factor 2 subunit 3 OS=Homo sapiens GN=EIF2S3 PE=1 SV=3	5.72034	2	2	2	1	472	51.1	8.4
Q9Y6K5	2'-5'-oligoadenylate synthase 3 OS=Homo sapiens GN=OAS3 PE=1 SV=3	5.70377	3	3	3	1	1087	121.1	8.4
Q0VDF9	Heat shock 70 kDa protein 14 OS=Homo sapiens GN=HSPA14 PE=1 SV=1	5.69745	1	1	1	1	509	54.8	5.59
Q99571	Isoform 2 of P2X purinoceptor 4 OS=Homo sapiens GN=P2RX4	5.69307	1	1	1	1	404	45.3	7.83
Q9NVI7	ATPase family AAA domain-containing protein 3A OS=Homo sapiens GN=ATAD3A PE=1 SV=2	5.67823	3	4	3	1	634	71.3	8.98
P06744	Isoform 2 of Glucose-6-phosphate isomerase OS=Homo sapiens GN=GPI	5.6239	2	3	2	1	569	64.3	8.91
P11387	DNA topoisomerase 1 OS=Homo sapiens GN=TOP1 PE=1 SV=2	5.62092	3	4	3	1	765	90.7	9.31
Q86VP6	Cullin-associated NEDD8-dissociated protein 1 OS=Homo sapiens GN=CAND1 PE=1 SV=2	5.60976	4	5	4	1	1230	136.3	5.78
Q9NR31	GTP-binding protein SAR1a OS=Homo sapiens GN=SAR1A PE=1 SV=1	5.55556	1	1	1	1	198	22.4	6.68
Q9UHX1	Poly(U)-binding-splicing factor PUF60 OS=Homo sapiens GN=PUF60 PE=1 SV=1	5.54562	1	1	1	1	559	59.8	5.29
P18669	Phosphoglycerate mutase 1 OS=Homo sapiens GN=PGAM1 PE=1 SV=2	5.51181	1	2	1	1	254	28.8	7.18
O76062	Delta(14)-sterol reductase OS=Homo sapiens GN=TM7SF2 PE=2 SV=3	5.50239	2	2	2	1	418	46.4	8.87
P49721	Proteasome subunit beta type-2 OS=Homo sapiens GN=PSMB2 PE=1 SV=1	5.47264	1	1	1	1	201	22.8	7.02
Q8TAA3	Proteasome subunit alpha type-7-like OS=Homo sapiens GN=PSMA8 PE=2 SV=3	5.46875	1	1	1	1	256	28.5	8.98
Q86YN1	Dolichyldiphosphatase 1 OS=Homo sapiens GN=DOLPP1 PE=2 SV=1	5.46218	1	1	1	1	238	27	9.44
O95470	Sphingosine-1-phosphate lyase 1 OS=Homo sapiens GN=SGPL1 PE=1 SV=3	5.45775	2	2	2	1	568	63.5	9.16
Q13242	Serine/arginine-rich splicing factor 9 OS=Homo sapiens GN=SRSF9 PE=1 SV=1	5.42986	1	1	1	1	221	25.5	8.65
Q15427	Splicing factor 3B subunit 4 OS=Homo sapiens GN=SF3B4 PE=1 SV=1	5.42453	1	1	1	1	424	44.4	8.56
P56182	Ribosomal RNA processing protein 1 homolog A OS=Homo sapiens GN=RRP1 PE=1 SV=1	5.42299	1	1	1	1	461	52.8	9.33
Q9NX18	Succinate dehydrogenase assembly factor 2, mitochondrial OS=Homo sapiens GN=SDHAF2 PE=1 SV=1	5.42169	1	1	1	1	166	19.6	6.8
P10619	Lysosomal protective protein OS=Homo sapiens GN=CTSA PE=1 SV=2	5.41667	2	2	2	1	480	54.4	6.61
P14209	CD99 antigen OS=Homo sapiens GN=CD99 PE=1 SV=1	5.40541	1	1	1	1	185	18.8	4.75
Q16890	Tumor protein D53 OS=Homo sapiens GN=TPD52L1 PE=1 SV=1	5.39216	1	1	1	1	204	22.4	5.62
Q4G176	Acyl-CoA synthetase family member 3, mitochondrial OS=Homo sapiens GN=ACSF3 PE=1 SV=3	5.38194	1	1	1	1	576	64.1	8.37
P55209	Nucleosome assembly protein 1-like 1 OS=Homo sapiens GN=NAP1L1 PE=1 SV=1	5.37084	2	2	2	1	391	45.3	4.46
P00414	Cytochrome c oxidase subunit 3 OS=Homo sapiens GN=MT-CO3 PE=1 SV=2	5.36398	1	1	1	1	261	29.9	7.31
Q9BXK5	Bcl-2-like protein 13 OS=Homo sapiens GN=BCL2L13 PE=1 SV=1	5.36082	1	1	1	1	485	52.7	4.44
P12694	Isoform 2 of 2-oxoisovalerate dehydrogenase subunit alpha, mitochondrial OS=Homo sapiens GN=BCKDHA	5.35714	1	1	1	1	448	50.8	7.15
Q8TCJ2	Dolichyl-diphosphooligosaccharide--protein glycosyltransferase subunit STT3B OS=Homo sapiens GN=STT3B PE=1 SV=1	5.32688	4	5	4	1	826	93.6	8.91
O95232	Luc7-like protein 3 OS=Homo sapiens GN=LUC7L3 PE=1 SV=2	5.32407	1	1	1	1	432	51.4	9.79
P09012	U1 small nuclear ribonucleoprotein A OS=Homo sapiens GN=SNRPA PE=1 SV=3	5.31915	2	2	1	1	282	31.3	9.83
Q6ZTQ4	Cadherin-related family member 3 OS=Homo sapiens GN=CDHR3 PE=1 SV=1	5.31073	1	1	1	1	885	97.9	5.41
P50148	Guanine nucleotide-binding protein G(q) subunit alpha OS=Homo sapiens GN=GNAQ PE=1 SV=4	5.29248	1	2	1	1	359	42.1	5.68
P29992	Guanine nucleotide-binding protein subunit alpha-11 OS=Homo sapiens GN=GNA11 PE=1 SV=2	5.29248	1	3	1	1	359	42.1	5.69
Q8TCC3	Isoform 2 of 39S ribosomal protein L30, mitochondrial OS=Homo sapiens GN=MRPL30	5.2356	1	1	1	1	191	21.8	10.07
Q5W0Z9	Probable palmitoyltransferase ZDHHC20 OS=Homo sapiens GN=ZDHHC20 PE=1 SV=1	5.20548	1	1	1	1	365	42.3	7.71
Q9BZE1	39S ribosomal protein L37, mitochondrial OS=Homo sapiens GN=MRPL37 PE=1 SV=2	5.20095	1	1	1	1	423	48.1	8.59
Q9BQG2	Peroxisomal NADH pyrophosphatase NUDT12 OS=Homo sapiens GN=NUDT12 PE=1 SV=1	5.19481	1	1	1	1	462	52	6.83
P09001	39S ribosomal protein L3, mitochondrial OS=Homo sapiens GN=MRPL3 PE=1 SV=1	5.17241	1	1	1	1	348	38.6	9.48
Q96AY3	Peptidyl-prolyl cis-trans isomerase FKBP10 OS=Homo sapiens GN=FKBP10 PE=1 SV=1	5.15464	3	3	3	1	582	64.2	5.62
Q8NCL4	Polypeptide N-acetylgalactosaminyltransferase 6 OS=Homo sapiens GN=GALNT6 PE=2 SV=2	5.14469	1	1	1	1	622	71.1	8.18
O95299	Isoform 2 of NADH dehydrogenase [ubiquinone] 1 alpha subcomplex subunit 10, mitochondrial OS=Homo sapiens GN=NDUFA10	5.12821	1	1	1	1	429	48.5	7.21
P55265	Isoform 4 of Double-stranded RNA-specific adenosine deaminase OS=Homo sapiens GN=ADAR	5.12214	4	4	4	1	1269	140.7	8.56
P00973	Isoform p48 of 2'-5'-oligoadenylate synthase 1 OS=Homo sapiens GN=OAS1	5.07246	1	2	1	1	414	47.4	8.95
Q5SXM8	DNL-type zinc finger protein OS=Homo sapiens GN=DNLZ PE=1 SV=1	5.05618	1	1	1	1	178	19.2	9.8
Q07812	Isoform Beta of Apoptosis regulator BAX OS=Homo sapiens GN=BAX	5.04587	1	1	1	1	218	24.2	7.9
P15170	Isoform 3 of Eukaryotic peptide chain release factor GTP-binding subunit ERF3A OS=Homo sapiens GN=GSPT1	5.02355	2	2	2	1	637	68.7	5.33
Q9BW60	Elongation of very long chain fatty acids protein 1 OS=Homo sapiens GN=ELOVL1 PE=1 SV=1	5.01792	1	1	1	1	279	32.6	9.6
Q02083	N-acylethanolamine-hydrolyzing acid amidase OS=Homo sapiens GN=NAAA PE=1 SV=3	5.01393	1	2	1	1	359	40	8.75
O75821	Eukaryotic translation initiation factor 3 subunit G OS=Homo sapiens GN=EIF3G PE=1 SV=2	5	1	1	1	1	320	35.6	6.13
O75534	Isoform 4 of Cold shock domain-containing protein E1 OS=Homo sapiens GN=CSDE1	4.9763	3	3	3	1	844	93.7	6.52
Q15436	Protein transport protein Sec23A OS=Homo sapiens GN=SEC23A PE=1 SV=2	4.96732	3	3	1	1	765	86.1	7.08
[truncated: 315 more rows]

## Sheet: MDA231
Accession	Description	Coverage	# Peptides	# PSMs	# Unique Peptides	# Protein Groups	# AAs	MW [kDa]	calc. pI
[truncated: 1,354 more rows]

[truncated: 1 more sheets: Hela]
