# Supplementary material for: Internalization Characterization of Si Nanorod with Camouflaged Cell Membrane Proteins Reveals ATXN2 as a Negative Regulator
Source: Cells. 2019 Aug 19;8(8):931. doi: 10.3390/cells8080931 (PMC6721741; doi:10.3390/cells8080931)
Supplement: Supplementary file 1 [file cells-08-00931-s001.zip › SI File 3 EnrichGO Result.xlsx]

## Sheet: Panc1.GO.All
ONTOLOGY	ID	Description	GeneRatio	BgRatio	pvalue	p.adjust	qvalue	geneID	Count
BP	GO:0006613	cotranslational protein targeting to membrane	89/1297	96/17653	5.02639e-93	2.55994e-89	2.12008e-89	RPL4/RPLP0/RPLP2/RPSA/RPL3/RPL7A/RPL9/RPL7/RPS4X/RPS3A/RPL15/RPS3/RPL6/RPS8/SRP72/RPL10/RPS17/RPL23A/RPL5/RPL12/RPS2/RPL21/RPS19/RPS7/RPL8/RPL22/RPL27A/RPS27A/RPL19/RPS5/RPS18/RPL18A/RPS14/RPL23/RPL13/RPL14/RPS10/RPL27/RPL28/RPLP1/RPL30/RPS12/RPS11/RPL24/RPS16/RPS23/RPS6/RPS13/RPL18/RPL17/RPS15/RPL36/RPL31/RPL13A/RPL26/RPS9/RPL37A/RPL35/RPS25/RPS26/RPL10A/RPL11/RPL32/SEC63/RPL36A/SRP9/SRP68/SRP14…	89
BP	GO:0006614	SRP-dependent cotranslational protein targeting to membrane	86/1297	91/17653	6.90333e-92	1.75793e-88	1.45588e-88	RPL4/RPLP0/RPLP2/RPSA/RPL3/RPL7A/RPL9/RPL7/RPS4X/RPS3A/RPL15/RPS3/RPL6/RPS8/SRP72/RPL10/RPS17/RPL23A/RPL5/RPL12/RPS2/RPL21/RPS19/RPS7/RPL8/RPL22/RPL27A/RPS27A/RPL19/RPS5/RPS18/RPL18A/RPS14/RPL23/RPL13/RPL14/RPS10/RPL27/RPL28/RPLP1/RPL30/RPS12/RPS11/RPL24/RPS16/RPS23/RPS6/RPS13/RPL18/RPL17/RPS15/RPL36/RPL31/RPL13A/RPL26/RPS9/RPL37A/RPL35/RPS25/RPS26/RPL10A/RPL11/RPL32/SEC63/RPL36A/SRP9/SRP68/SRP14…	86
BP	GO:0045047	protein targeting to ER	88/1297	101/17653	3.27402e-86	5.5582e-83	4.60316e-83	HYOU1/RPL4/RPLP0/RPLP2/RPSA/RPL3/RPL7A/RPL9/RPL7/RPS4X/RPS3A/RPL15/RPS3/RPL6/RPS8/SRP72/RPL10/RPS17/RPL23A/RPL5/RPL12/RPS2/RPL21/RPS19/RPS7/RPL8/RPL22/RPL27A/RPS27A/RPL19/RPS5/RPS18/RPL18A/RPS14/RPL23/RPL13/RPL14/RPS10/RPL27/RPL28/RPLP1/RPL30/RPS12/RPS11/RPL24/RPS16/RPS23/RPS6/RPS13/RPL18/RPL17/RPS15/RPL36/RPL31/RPL13A/RPL26/RPS9/RPL37A/RPL35/RPS25/RPS26/RPL10A/RPL11/RPL32/SEC63/RPL36A/SRP9/SRP68…	88
BP	GO:0072599	establishment of protein localization to endoplasmic reticulum	89/1297	105/17653	7.00201e-85	8.91531e-82	7.38344e-82	HYOU1/RPL4/RPLP0/RPLP2/RPSA/RPL3/RPL7A/RPL9/RPL7/RPS4X/RPS3A/RPL15/RPS3/RPL6/RPS8/SRP72/RPL10/RPS17/RPL23A/RPL5/RPL12/RPS2/RPL21/RPS19/RPS7/RPL8/RAB10/RPL22/RPL27A/RPS27A/RPL19/RPS5/RPS18/RPL18A/RPS14/RPL23/RPL13/RPL14/RPS10/RPL27/RPL28/RPLP1/RPL30/RPS12/RPS11/RPL24/RPS16/RPS23/RPS6/RPS13/RPL18/RPL17/RPS15/RPL36/RPL31/RPL13A/RPL26/RPS9/RPL37A/RPL35/RPS25/RPS26/RPL10A/RPL11/RPL32/SEC63/RPL36A/SRP9…	89
BP	GO:0070972	protein localization to endoplasmic reticulum	97/1297	131/17653	9.30515e-82	9.47822e-79	7.84963e-79	HSPA5/HYOU1/PDIA3/RPL4/RPLP0/RPLP2/RPSA/RTN4/RPL3/RPL7A/RPL9/RPL7/RPS4X/RPS3A/RPL15/RPS3/RPL6/RPS8/SRP72/RPL10/BCAP31/RPS17/RPL23A/RPL5/RPL12/RPS2/RPL21/RPS19/RPS7/RPL8/RAB10/RPL22/RPL27A/RPS27A/RPL19/RPS5/RPS18/RPL18A/RPS14/VAPA/RPL23/RPL13/RPL14/RPS10/RPL27/RPL28/RPLP1/RPL30/RPS12/RPS11/RPL24/RPS16/RPS23/RPS6/RPS13/RPL18/RPL17/RPS15/RPL36/RPL31/RPL13A/RPL26/RPS9/RPL37A/RPL35/RPS25/RPS26/RPL10A/…	97
BP	GO:0006402	mRNA catabolic process	139/1297	351/17653	9.68998e-67	8.22518e-64	6.81189e-64	HSPA8/VIM/HSPA1A/HSPA1B/NPM1/RPL4/RPLP0/PABPC1/YBX1/RPLP2/RPSA/HNRNPU/RPL3/RPL7A/YWHAZ/RPL9/RPL7/YWHAB/RPS4X/RPS3A/HSPB1/RPL15/RPS3/PABPC4/RPL6/RPS8/RPL10/EIF4A1/SERBP1/RPS17/RPL23A/RPL5/IGF2BP3/RPL12/RPS2/RPL21/RPS19/SYNCRIP/IGF2BP2/RPS7/IGF2BP1/RPL8/ETF1/RPL22/SET/RPL27A/RPS27A/RPL19/RPS5/RPS18/PSMA7/RPL18A/RPS14/RPL23/RPL13/RPL14/EIF4B/RPS10/RPL27/RPL28/TARDBP/RPLP1/RPL30/RPS12/RPS11/HNRNPC/HN…	139
BP	GO:0006413	translational initiation	104/1297	195/17653	7.48302e-66	5.44443e-63	4.50894e-63	NPM1/RPL4/RPLP0/PABPC1/RPLP2/RPSA/RPL3/RPL7A/RPL9/RPL7/RPS4X/RPS3A/HSPB1/RPL15/RPS3/DDX3X/RPL6/RPS8/RPL10/EIF4A1/RPS17/RPL23A/RPL5/RPL12/RPS2/RPL21/RPS19/RPS7/RPL8/RPL22/RPL27A/RPS27A/DNAJC3/RPL19/RPS5/DDX1/RPS18/RPL18A/RPS14/RPL23/RPL13/RPL14/EIF4B/RPS10/RPL27/PPP1CA/RPL28/RPLP1/RPL30/RPS12/RPS11/RPL24/RPS16/RPS23/KHDRBS1/RPS6/RPS13/EIF4H/RPL18/RPL17/RPS15/ABCE1/RPL36/RPL31/EIF2S3/EIF6/RPL13A/RP…	104
BP	GO:0006401	RNA catabolic process	143/1297	384/17653	1.48216e-64	9.43581e-62	7.8145e-62	HSPA8/LRPPRC/VIM/HSPA1A/HSPA1B/NPM1/SND1/RPL4/RPLP0/PABPC1/YBX1/RPLP2/RPSA/HNRNPU/RPL3/RPL7A/YWHAZ/RPL9/RPL7/YWHAB/RPS4X/RPS3A/HSPB1/RPL15/RPS3/PABPC4/RPL6/RPS8/RPL10/EIF4A1/SERBP1/SLIRP/RPS17/RPL23A/RPL5/IGF2BP3/RPL12/RPS2/RPL21/RPS19/SYNCRIP/IGF2BP2/RPS7/IGF2BP1/RPL8/ETF1/RPL22/SET/RPL27A/RPS27A/RPL19/RPS5/RPS18/PSMA7/RPL18A/RPS14/RPL23/RPL13/RPL14/EIF4B/RPS10/RPL27/RPL28/TARDBP/RPLP1/RPL30/RPS…	143
BP	GO:0090150	establishment of protein localization to membrane	125/1297	296/17653	7.42815e-64	4.20351e-61	3.48124e-61	HYOU1/KRT18/RPL4/RPLP0/RPLP2/RPSA/RPL3/RPL7A/YWHAZ/HSP90AA1/RPL9/RPL7/YWHAB/RPS4X/RPS3A/YWHAG/RPL15/RPS3/RPL6/RPS8/SRP72/YWHAQ/RPL10/YWHAE/RACK1/RPS17/RPL23A/RPL5/RPL12/RPS2/RPL21/RPS19/RPS7/RPL8/RAB10/RPL22/RPL27A/RPS27A/RPL19/RPS5/RPS18/RPL18A/TIMM13/RPS14/RPL23/RPL13/RPL14/VAMP3/TOMM22/RPS10/RPL27/NSF/GOLPH3/SFN/RPL28/RPLP1/RPL30/RPS12/RPS11/RPL24/YWHAH/RPS16/RPS23/RPS6/RPS13/RPL18/RPL17/RPS15…	125
BP	GO:0000184	nuclear-transcribed mRNA catabolic process, nonsense-mediated decay	81/1297	120/17653	4.78479e-63	2.43689e-60	2.01818e-60	RPL4/RPLP0/PABPC1/RPLP2/RPSA/RPL3/RPL7A/RPL9/RPL7/RPS4X/RPS3A/RPL15/RPS3/RPL6/RPS8/RPL10/RPS17/RPL23A/RPL5/RPL12/RPS2/RPL21/RPS19/RPS7/RPL8/ETF1/RPL22/RPL27A/RPS27A/RPL19/RPS5/RPS18/RPL18A/RPS14/RPL23/RPL13/RPL14/RPS10/RPL27/RPL28/RPLP1/RPL30/RPS12/RPS11/RPL24/RPS16/RPS23/RPS6/RPS13/RPL18/RPL17/RPS15/RPL36/RPL31/RPL13A/RPL26/RPS9/RPL37A/RPL35/RPS25/RPS26/RPL10A/RPL11/RPL32/RPL36A/RPS27/RPL34/RPS2…	81
BP	GO:0006612	protein targeting to membrane	96/1297	182/17653	3.23944e-60	1.49986e-57	1.24215e-57	HYOU1/RPL4/RPLP0/RPLP2/RPSA/RPL3/RPL7A/RPL9/RPL7/RPS4X/RPS3A/RPL15/RPS3/RPL6/RPS8/SRP72/RPL10/RPS17/RPL23A/RPL5/RPL12/RPS2/RPL21/RPS19/RPS7/RPL8/RPL22/RPL27A/RPS27A/RPL19/RPS5/RPS18/RPL18A/RPS14/RPL23/RPL13/RPL14/RPS10/RPL27/RPL28/RPLP1/RPL30/RPS12/RPS11/RPL24/RPS16/RPS23/RPS6/RPS13/RPL18/RPL17/RPS15/RPL36/RPL31/RPL13A/GDI1/RPL26/RPS9/RPL37A/RPL35/RPS25/RPS26/RPL10A/RPL11/RPL32/CHP1/SEC63/RPL36A/…	96
BP	GO:0006605	protein targeting	144/1297	419/17653	8.99854e-60	3.81913e-57	3.16291e-57	HSPD1/HYOU1/HSPA8/UQCRC2/RPL4/RPLP0/RPLP2/RPSA/RPL3/TIMM50/RAB7A/RPL7A/YWHAZ/HSP90AA1/RPL9/TOMM40/RPL7/YWHAB/RPS4X/RPS3A/YWHAG/NUCB1/RPL15/RPS3/RUVBL1/RPL6/RPS8/SRP72/SLC25A6/YWHAQ/RPL10/YWHAE/RPS17/GRPEL1/RPL23A/RPL5/TOMM70/RPL12/RPS2/RPL21/RPS19/RPS7/RPL8/RPL22/RPL27A/RPS27A/RPL19/RPS5/RPS18/RPL18A/TIMM13/RPS14/RPL23/RPL13/RPL14/TOMM22/RPS10/RPL27/RPL28/RPLP1/RPL30/RPS12/RPS11/RPL24/RPS16/RPS23…	144
BP	GO:0045333	cellular respiration	88/1297	183/17653	7.71897e-51	3.02405e-48	2.50445e-48	VCP/CAT/IDH2/MDH2/ETFA/UQCRC2/DLD/UQCRC1/SDHA/FH/ACO2/OGDH/CS/TRAP1/COX5A/UQCRFS1/SLC25A13/COX6B1/ETFB/DLST/DLAT/NDUFA5/NDUFS3/PDHB/SUCLG2/CYC1/NDUFA8/IDH3A/COX5B/GPD2/NDUFAB1/COX4I1/NNT/NDUFB10/IDH3B/UQCRB/NDUFS1/UQCRH/NDUFV1/COX2/NDUFA10/NDUFA9/CISD1/NDUFV2/SUCLG1/SLC25A12/PARK7/SIRT3/CYCS/SDHB/BID/PDHA1/NDUFA2/PNPT1/ME3/NDUFB11/TBRG4/NDUFA11/COX6A1/NDUFAF2/NDUFB7/UQCRQ/COX7A2L/MDH1/NDUFB4/COX2…	88
BP	GO:0000956	nuclear-transcribed mRNA catabolic process	90/1297	209/17653	6.49527e-47	2.36289e-44	1.95688e-44	RPL4/RPLP0/PABPC1/RPLP2/RPSA/RPL3/RPL7A/RPL9/RPL7/RPS4X/RPS3A/RPL15/RPS3/RPL6/RPS8/RPL10/EIF4A1/RPS17/RPL23A/RPL5/RPL12/RPS2/RPL21/RPS19/RPS7/RPL8/ETF1/RPL22/RPL27A/RPS27A/RPL19/RPS5/RPS18/RPL18A/RPS14/RPL23/RPL13/RPL14/EIF4B/RPS10/RPL27/RPL28/RPLP1/RPL30/RPS12/RPS11/RPL24/RPS16/DDX6/RPS23/RPS6/RPS13/RPL18/RPL17/RPS15/RPL36/RPL31/RPL13A/RPL26/RPS9/RPL37A/RPL35/RPS25/RPS26/RPL10A/SSB/RPL11/RPL32/R…	90
BP	GO:0006119	oxidative phosphorylation	72/1297	132/17653	1.08494e-46	3.68374e-44	3.05078e-44	ATP5F1B/VCP/ATP5F1A/STOML2/UQCRC2/DLD/UQCRC1/SDHA/ATP5PB/RHOA/ATP5PO/COX5A/UQCRFS1/COX6B1/ATP5PD/NDUFA5/ATP5PF/NDUFS3/ATP5F1C/CYC1/NDUFA8/ATP5F1D/COX5B/NDUFAB1/COX4I1/NDUFB10/UQCRB/NDUFS1/UQCRH/NDUFV1/COX2/NDUFA10/NDUFA9/NDUFV2/ATP5MG/PARK7/ATP5ME/CYCS/BID/NIPSNAP2/NDUFA2/NDUFB11/ATP5MF/NDUFA11/COX6A1/NDUFB7/UQCRQ/COX7A2L/NDUFB4/UQCR10/NDUFS8/COX7C/NDUFS2/NDUFS5/COX7B/ATP8/NDUFC2/ATP5F1E/NDUFA12/…	72
BP	GO:0019080	viral gene expression	85/1297	190/17653	5.75083e-46	1.83056e-43	1.51603e-43	PTBP1/RPL4/RPLP0/RPLP2/RPSA/RPL3/RPL7A/RPL9/RPL7/RPS4X/RPS3A/RPL15/RPS3/RPL6/RPS8/RPL10/PCBP2/RPS17/RPL23A/RPL5/RPL12/RPS2/RPL21/RPS19/RPS7/RPL8/RPL22/RPL27A/RPS27A/RPL19/RPS5/RPS18/RPL18A/RPS14/RPL23/RPL13/RPL14/RPS10/RPL27/RPL28/TARDBP/RPLP1/RPL30/RPS12/RPS11/RPL24/RPS16/RPS23/RPS6/RPS13/RPL18/RPL17/RPS15/RPL36/RPL31/RPL13A/RPL26/RPS9/RPL37A/RPL35/RPS25/RPS26/EIF3A/RPL10A/MCTS1/SSB/RPL11/RPL32/…	85
BP	GO:0022613	ribonucleoprotein complex biogenesis	136/1297	475/17653	7.18998e-46	2.15403e-43	1.78392e-43	NPM1/HSP90AB1/RPL4/RPLP0/RPLP2/RPSA/RPL3/RPL7A/HSP90AA1/RPL9/C1QBP/RPL7/RPS4X/RPS3A/RPL15/RPS3/DDX3X/RUVBL1/RPL6/RPS8/RPL10/RPS17/RPL23A/RPL5/RPL12/RPS2/PA2G4/RPL21/RPS19/RPS7/RPL8/DDX21/DDX39B/RPL22/DDX17/RPL27A/RPS27A/SRSF1/RPL19/RPS5/DDX1/RPS18/RPL18A/RPS14/RPL23/RPL13/RPL14/EIF4B/RPS10/RPL27/RUVBL2/MRPL1/RAN/RPL28/NOLC1/RPLP1/RPL30/RPS12/RPS11/PTGES3/RPL24/RPS16/DDX6/RPS23/RPS6/SF1/RPS13/XPO1…	136
BP	GO:0009205	purine ribonucleoside triphosphate metabolic process	106/1297	309/17653	6.81368e-44	1.92789e-41	1.59663e-41	ATP5F1B/PKM/VCP/HSPA8/ENO1/ALDOA/GAPDH/HSPA1A/HSPA1B/ATP5F1A/STOML2/UQCRC2/DLD/UQCRC1/SDHA/PGK1/OGDH/ATP5PB/LDHA/RHOA/ATP5PO/COX5A/UQCRFS1/SLC25A13/ALDOC/COX6B1/ATP5PD/STAT3/NDUFA5/OPA1/ATP5PF/NDUFS3/TPI1/ATP5F1C/CYC1/DNM1L/NDUFA8/ATP5F1D/COX5B/NDUFAB1/PARP1/RAN/COX4I1/HK1/NDUFB10/GNAI3/UQCRB/NDUFS1/UQCRH/PGAM1/NDUFV1/NME2/COX2/NDUFA10/EIF6/NME1/NDUFA9/NDUFV2/ATP5MG/ATP5IF1/PARK7/ATP5ME/CYCS/NME3…	106
BP	GO:0009199	ribonucleoside triphosphate metabolic process	107/1297	315/17653	7.71245e-44	2.06734e-41	1.71212e-41	ATP5F1B/PKM/VCP/HSPA8/ENO1/ALDOA/GAPDH/HSPA1A/HSPA1B/ATP5F1A/STOML2/UQCRC2/DLD/UQCRC1/SDHA/PGK1/OGDH/ATP5PB/LDHA/RHOA/ATP5PO/COX5A/UQCRFS1/SLC25A13/ALDOC/COX6B1/ATP5PD/STAT3/NDUFA5/OPA1/ATP5PF/NDUFS3/TPI1/ATP5F1C/CYC1/DNM1L/NDUFA8/ATP5F1D/COX5B/NDUFAB1/PARP1/RAN/COX4I1/HK1/NDUFB10/GNAI3/UQCRB/NDUFS1/UQCRH/PGAM1/NDUFV1/NME2/COX2/NDUFA10/EIF6/NME1/NDUFA9/NDUFV2/ATP5MG/ATP5IF1/PARK7/ATP5ME/CYCS/NME3…	107
BP	GO:0009144	purine nucleoside triphosphate metabolic process	107/1297	316/17653	1.08693e-43	2.76787e-41	2.29228e-41	ATP5F1B/PKM/VCP/HSPA8/ENO1/ALDOA/GAPDH/HSPA1A/HSPA1B/ATP5F1A/STOML2/UQCRC2/DLD/UQCRC1/SDHA/PGK1/OGDH/ATP5PB/LDHA/RHOA/ATP5PO/COX5A/UQCRFS1/SLC25A13/ALDOC/COX6B1/ATP5PD/STAT3/NDUFA5/OPA1/ATP5PF/NDUFS3/TPI1/ATP5F1C/CYC1/DNM1L/NDUFA8/ATP5F1D/COX5B/NDUFAB1/PARP1/RAN/COX4I1/HK1/NDUFB10/GNAI3/UQCRB/NDUFS1/UQCRH/PGAM1/NDUFV1/NME2/COX2/NDUFA10/EIF6/NME1/NDUFA9/NDUFV2/ATP5MG/ATP5IF1/PARK7/ATP5ME/CYCS/NME3…	107
BP	GO:0046034	ATP metabolic process	99/1297	279/17653	1.6207e-42	3.93059e-40	3.25521e-40	ATP5F1B/PKM/VCP/HSPA8/ENO1/ALDOA/GAPDH/HSPA1A/HSPA1B/ATP5F1A/STOML2/UQCRC2/DLD/UQCRC1/SDHA/PGK1/OGDH/ATP5PB/LDHA/RHOA/ATP5PO/COX5A/UQCRFS1/SLC25A13/ALDOC/COX6B1/ATP5PD/STAT3/NDUFA5/ATP5PF/NDUFS3/TPI1/ATP5F1C/CYC1/DNM1L/NDUFA8/ATP5F1D/COX5B/NDUFAB1/PARP1/COX4I1/HK1/NDUFB10/UQCRB/NDUFS1/UQCRH/PGAM1/NDUFV1/COX2/NDUFA10/EIF6/NDUFA9/NDUFV2/ATP5MG/ATP5IF1/PARK7/ATP5ME/CYCS/BID/NIPSNAP2/NDUFA2/PFKP/NDUF…	99
BP	GO:0009141	nucleoside triphosphate metabolic process	109/1297	337/17653	2.48438e-42	5.75135e-40	4.76312e-40	ATP5F1B/PKM/VCP/HSPA8/ENO1/ALDOA/GAPDH/HSPA1A/HSPA1B/ATP5F1A/STOML2/UQCRC2/DLD/UQCRC1/SDHA/PGK1/OGDH/ATP5PB/LDHA/RHOA/ATP5PO/COX5A/UQCRFS1/SLC25A13/ALDOC/COX6B1/ATP5PD/STAT3/NDUFA5/OPA1/ATP5PF/NDUFS3/TPI1/ATP5F1C/CYC1/DNM1L/NDUFA8/ATP5F1D/COX5B/NDUFAB1/PARP1/RAN/COX4I1/HK1/NDUFB10/GNAI3/UQCRB/NDUFS1/UQCRH/PGAM1/NDUFV1/NME2/COX2/NDUFA10/EIF6/NME1/NDUFA9/NDUFV2/ATP5MG/SUCLG1/ATP5IF1/PARK7/ATP5ME/CY…	109
BP	GO:0019083	viral transcription	78/1297	176/17653	7.03817e-42	1.5585e-39	1.29071e-39	RPL4/RPLP0/RPLP2/RPSA/RPL3/RPL7A/RPL9/RPL7/RPS4X/RPS3A/RPL15/RPS3/RPL6/RPS8/RPL10/RPS17/RPL23A/RPL5/RPL12/RPS2/RPL21/RPS19/RPS7/RPL8/RPL22/RPL27A/RPS27A/RPL19/RPS5/RPS18/RPL18A/RPS14/RPL23/RPL13/RPL14/RPS10/RPL27/RPL28/TARDBP/RPLP1/RPL30/RPS12/RPS11/RPL24/RPS16/RPS23/RPS6/RPS13/RPL18/RPL17/RPS15/RPL36/RPL31/RPL13A/RPL26/RPS9/RPL37A/RPL35/RPS25/RPS26/RPL10A/RPL11/RPL32/RPL36A/RPS27/RPL34/RPS20/RPL…	78
BP	GO:0009167	purine ribonucleoside monophosphate metabolic process	106/1297	323/17653	7.69012e-42	1.63191e-39	1.3515e-39	ATP5F1B/PKM/VCP/HSPA8/ENO1/ALDOA/GAPDH/HSPA1A/HSPA1B/ATP5F1A/STOML2/UQCRC2/DLD/UQCRC1/SDHA/PGK1/OGDH/ATP5PB/LDHA/AK2/RHOA/ATP5PO/COX5A/UQCRFS1/SLC25A13/ALDOC/COX6B1/ATP5PD/STAT3/NDUFA5/ATP5PF/NDUFS3/TPI1/PAICS/ATP5F1C/CYC1/DNM1L/NDUFA8/ATP5F1D/COX5B/NDUFAB1/PARP1/COX4I1/HK1/NDUFB10/UQCRB/NDUFS1/UQCRH/PGAM1/NDUFV1/COX2/NDUFA10/EIF6/NDUFA9/NDUFV2/ATP5MG/ATP5IF1/PARK7/GMPS/ATP5ME/CYCS/BID/NIPSNAP2/N…	106
BP	GO:0009126	purine nucleoside monophosphate metabolic process	106/1297	324/17653	1.06526e-41	2.17014e-39	1.79726e-39	ATP5F1B/PKM/VCP/HSPA8/ENO1/ALDOA/GAPDH/HSPA1A/HSPA1B/ATP5F1A/STOML2/UQCRC2/DLD/UQCRC1/SDHA/PGK1/OGDH/ATP5PB/LDHA/AK2/RHOA/ATP5PO/COX5A/UQCRFS1/SLC25A13/ALDOC/COX6B1/ATP5PD/STAT3/NDUFA5/ATP5PF/NDUFS3/TPI1/PAICS/ATP5F1C/CYC1/DNM1L/NDUFA8/ATP5F1D/COX5B/NDUFAB1/PARP1/COX4I1/HK1/NDUFB10/UQCRB/NDUFS1/UQCRH/PGAM1/NDUFV1/COX2/NDUFA10/EIF6/NDUFA9/NDUFV2/ATP5MG/ATP5IF1/PARK7/GMPS/ATP5ME/CYCS/BID/NIPSNAP2/N…	106
BP	GO:0009161	ribonucleoside monophosphate metabolic process	108/1297	336/17653	1.17243e-41	2.2966e-39	1.90199e-39	ATP5F1B/PKM/VCP/HSPA8/ENO1/ALDOA/GAPDH/HSPA1A/HSPA1B/ATP5F1A/STOML2/UQCRC2/DLD/UQCRC1/SDHA/PGK1/OGDH/ATP5PB/LDHA/AK2/RHOA/ATP5PO/COX5A/UQCRFS1/SLC25A13/ALDOC/COX6B1/ATP5PD/STAT3/NDUFA5/ATP5PF/NDUFS3/TPI1/PAICS/ATP5F1C/CYC1/DNM1L/NDUFA8/ATP5F1D/COX5B/NDUFAB1/PARP1/PRPS1/COX4I1/HK1/NDUFB10/UQCRB/NDUFS1/UQCRH/PGAM1/NDUFV1/COX2/NDUFA10/EIF6/NDUFA9/NDUFV2/ATP5MG/ATP5IF1/PARK7/GMPS/ATP5ME/CYCS/BID/NIPS…	108
BP	GO:0009123	nucleoside monophosphate metabolic process	109/1297	352/17653	2.5789e-40	4.86458e-38	4.02872e-38	ATP5F1B/PKM/VCP/HSPA8/ENO1/ALDOA/GAPDH/HSPA1A/HSPA1B/ATP5F1A/STOML2/UQCRC2/DLD/UQCRC1/SDHA/PGK1/OGDH/ATP5PB/LDHA/AK2/RHOA/ATP5PO/COX5A/UQCRFS1/SLC25A13/ALDOC/COX6B1/ATP5PD/STAT3/NDUFA5/ATP5PF/NDUFS3/TPI1/PAICS/ATP5F1C/CYC1/DNM1L/NDUFA8/ATP5F1D/COX5B/NDUFAB1/PARP1/PRPS1/COX4I1/HK1/NDUFB10/UQCRB/NDUFS1/UQCRH/PGAM1/NDUFV1/COX2/NDUFA10/EIF6/NDUFA9/NDUFV2/ATP5MG/ATP5IF1/PARK7/GMPS/ATP5ME/CYCS/BID/NIPS…	109
BP	GO:0022904	respiratory electron transport chain	60/1297	113/17653	3.59087e-38	6.53154e-36	5.40925e-36	ETFA/UQCRC2/DLD/UQCRC1/SDHA/COX5A/UQCRFS1/SLC25A13/COX6B1/ETFB/NDUFA5/NDUFS3/CYC1/NDUFA8/COX5B/GPD2/NDUFAB1/COX4I1/NDUFB10/UQCRB/NDUFS1/UQCRH/NDUFV1/COX2/NDUFA10/NDUFA9/NDUFV2/SLC25A12/PARK7/CYCS/SDHB/BID/NDUFA2/NDUFB11/NDUFA11/COX6A1/NDUFAF2/NDUFB7/UQCRQ/COX7A2L/NDUFB4/UQCR10/NDUFS8/COX7C/NDUFS2/NDUFS5/COX7B/NDUFC2/NDUFA12/NDUFS6/PMPCB/NDUFA3/NDUFB3/NDUFB1/NDUFA4/COA6/NDUFB9/COX6C/NDUFA13/COX3	60
BP	GO:0015980	energy derivation by oxidation of organic compounds	93/1297	277/17653	1.05895e-37	1.85973e-35	1.54018e-35	VCP/CAT/IDH2/MDH2/ETFA/UQCRC2/DLD/UQCRC1/SDHA/FH/ACO2/OGDH/CS/TRAP1/COX5A/UQCRFS1/SLC25A13/COX6B1/ETFB/DLST/DLAT/NDUFA5/NDUFS3/PDHB/GNAS/ACADVL/SUCLG2/CYC1/RPS27A/NDUFA8/IDH3A/COX5B/GPD2/PPP1CA/NDUFAB1/COX4I1/NNT/NDUFB10/IDH3B/UQCRB/NDUFS1/UQCRH/NDUFV1/COX2/NDUFA10/NDUFA9/CISD1/NDUFV2/SUCLG1/SLC25A12/PARK7/SIRT3/CYCS/SDHB/BID/PDHA1/NDUFA2/PNPT1/ME3/NDUFB11/TBRG4/NDUFA11/COX6A1/NDUFAF2/NDUFB7/UQCR…	93
BP	GO:0022900	electron transport chain	74/1297	180/17653	4.79095e-37	8.13343e-35	6.7359e-35	ETFA/UQCRC2/DLD/UQCRC1/SDHA/POR/P4HA2/COX5A/UQCRFS1/SLC25A13/COX6B1/ASPH/ETFB/NDUFA5/ME2/NDUFS3/CYC1/UGDH/NDUFA8/COX5B/GPD2/NDUFAB1/COX4I1/C15orf48/NDUFB10/IDH3B/UQCRB/NDUFS1/UQCRH/NDUFV1/COX2/NDUFA10/NDUFA9/ALDH4A1/NDUFV2/SLC25A12/PARK7/CYCS/SDHB/BID/PTGES2/NDUFA2/NDUFB11/NDUFA11/COX7A2/COX6A1/NDUFAF2/NDUFB7/SH3BGRL3/UQCRQ/COX7A2L/NDUFB4/UQCR10/NDUFS8/GLRX5/COX7C/NDUFS2/CYB5A/NDUFS5/TXNRD1/COX7B…	74
BP	GO:0006364	rRNA processing	90/1297	265/17653	5.81414e-37	9.55207e-35	7.91078e-35	RPL4/RPLP0/RPLP2/RPSA/RPL3/RPL7A/RPL9/RPL7/RPS4X/RPS3A/RPL15/RPS3/RPL6/RPS8/RPL10/RPS17/RPL23A/RPL5/RPL12/RPS2/PA2G4/RPL21/RPS19/RPS7/RPL8/DDX21/RPL22/DDX17/RPL27A/RPS27A/RPL19/RPS5/RPS18/RPL18A/RPS14/RPL23/RPL13/RPL14/RPS10/RPL27/MRPL1/RPL28/NOLC1/RPLP1/RPL30/RPS12/RPS11/RPL24/RPS16/RPS23/RPS6/RPS13/RPL18/RPL17/RPS15/RPL36/RPL31/EIF6/RPL13A/RPL26/RPS9/RPL37A/RPL35/RPS25/RPS26/RPL10A/RPL11/RPL32/…	90
BP	GO:0042254	ribosome biogenesis	101/1297	335/17653	2.87476e-36	4.57537e-34	3.7892e-34	NPM1/RPL4/RPLP0/RPLP2/RPSA/RPL3/RPL7A/RPL9/C1QBP/RPL7/RPS4X/RPS3A/RPL15/RPS3/DDX3X/RPL6/RPS8/RPL10/RPS17/RPL23A/RPL5/RPL12/RPS2/PA2G4/RPL21/RPS19/RPS7/RPL8/DDX21/RPL22/DDX17/RPL27A/RPS27A/RPL19/RPS5/RPS18/RPL18A/RPS14/RPL23/RPL13/RPL14/RPS10/RPL27/MRPL1/RAN/RPL28/NOLC1/RPLP1/RPL30/RPS12/RPS11/RPL24/RPS16/RPS23/RPS6/RPS13/XPO1/RPL18/RPL17/RPS15/ABCE1/RPL36/RPL31/EIF6/RPL13A/MRPL10/RPL26/RPS9/RPL37…	101
BP	GO:0002181	cytoplasmic translation	51/1297	88/17653	3.5738e-35	5.51556e-33	4.56785e-33	EEF2/RPL4/RPLP0/RPLP2/RPL9/RPL7/RPS3A/RPL15/RPS3/RPL6/RPS7/RPL8/RPL22/RPL27A/RPL19/RPL18A/EIF4B/RPLP1/RPL30/RPL24/RPS23/EIF4H/RPL18/RPL17/RPL36/RPL31/EIF2S3/RPL13A/RPL26/RPS26/EIF3A/YBX3/RPL10A/MCTS1/RPL11/RPL32/RPL36A/RPS20/RPL26L1/RPL38/RPL35A/RPS28/RPL29/MRPL2/RBM4/RPL39/EIF4G1/GSPT1/RPS21/ZC3H15/RPS29	51
BP	GO:0042773	ATP synthesis coupled electron transport	53/1297	96/17653	5.14521e-35	7.70721e-33	6.38292e-33	UQCRC2/DLD/UQCRC1/SDHA/COX5A/UQCRFS1/COX6B1/NDUFA5/NDUFS3/CYC1/NDUFA8/COX5B/NDUFAB1/COX4I1/NDUFB10/UQCRB/NDUFS1/UQCRH/NDUFV1/COX2/NDUFA10/NDUFA9/NDUFV2/PARK7/CYCS/BID/NDUFA2/NDUFB11/NDUFA11/COX6A1/NDUFB7/UQCRQ/COX7A2L/NDUFB4/UQCR10/NDUFS8/COX7C/NDUFS2/NDUFS5/COX7B/NDUFC2/NDUFA12/NDUFS6/PMPCB/NDUFA3/NDUFB3/NDUFB1/NDUFA4/COA6/NDUFB9/COX6C/NDUFA13/COX3	53
BP	GO:0070125	mitochondrial translational elongation	50/1297	87/17653	2.92099e-34	4.25046e-32	3.52013e-32	TUFM/MRPL12/TSFM/MRPS31/MRPL1/GFM1/MRPL10/MRPL4/MRPL28/MRPS17/MRPL41/DAP3/MRPS27/MRPL46/MRPL37/MRPS18B/MRPL11/MRPS35/MRPL49/MRPS22/MRPL52/MRPL2/MRPS9/MRPS18C/PTCD3/MRPS30/MRPL17/MRPL23/MRPS36/MRPL40/MRPS11/MRPL54/MRPS26/MRPS16/MRPL20/MRPL21/MRPS14/MRPS23/MRPL53/MRPL19/MRPS12/MRPL30/MRPS7/MRPL44/MRPS15/MRPS6/MRPS5/MRPL43/MRPL13/MRPS28	50
BP	GO:0042775	mitochondrial ATP synthesis coupled electron transport	52/1297	95/17653	4.01109e-34	5.67458e-32	4.69954e-32	UQCRC2/DLD/UQCRC1/SDHA/COX5A/UQCRFS1/COX6B1/NDUFA5/NDUFS3/CYC1/NDUFA8/COX5B/NDUFAB1/COX4I1/NDUFB10/UQCRB/NDUFS1/UQCRH/NDUFV1/COX2/NDUFA10/NDUFA9/NDUFV2/PARK7/CYCS/BID/NDUFA2/NDUFB11/NDUFA11/COX6A1/NDUFB7/UQCRQ/COX7A2L/NDUFB4/UQCR10/NDUFS8/COX7C/NDUFS2/NDUFS5/COX7B/NDUFC2/NDUFA12/NDUFS6/PMPCB/NDUFA3/NDUFB3/NDUFB1/NDUFA4/NDUFB9/COX6C/NDUFA13/COX3	52
BP	GO:0016072	rRNA metabolic process	92/1297	299/17653	7.06572e-34	9.72587e-32	8.05472e-32	NCL/RPL4/RPLP0/RPLP2/RPSA/CAVIN1/RPL3/RPL7A/RPL9/RPL7/RPS4X/RPS3A/RPL15/RPS3/RPL6/RPS8/RPL10/RPS17/RPL23A/RPL5/RPL12/RPS2/PA2G4/RPL21/RPS19/RPS7/RPL8/DDX21/RPL22/DDX17/RPL27A/RPS27A/RPL19/RPS5/RPS18/RPL18A/RPS14/RPL23/RPL13/RPL14/RPS10/RPL27/MRPL1/RPL28/NOLC1/RPLP1/RPL30/RPS12/RPS11/RPL24/RPS16/RPS23/RPS6/RPS13/RPL18/RPL17/RPS15/RPL36/RPL31/EIF6/RPL13A/RPL26/RPS9/RPL37A/RPL35/RPS25/RPS26/RPL10A/R…	92
BP	GO:0006414	translational elongation	61/1297	134/17653	8.42681e-34	1.12941e-31	9.35352e-32	EEF2/EEF1A1/TUFM/EEF1A2/EIF5A/RPLP2/RACK1/EEF1G/MRPL12/EEF1D/TSFM/MRPS31/MRPL1/RPLP1/GFM1/EEF1B2/MRPL10/MRPL4/MRPL28/MRPS17/MRPL41/DAP3/MRPS27/MRPL46/MRPL37/MRPS18B/MRPL11/MRPS35/MRPL49/SRP9/MRPS22/MRPL52/MRPL2/MRPS9/MRPS18C/PTCD3/MRPS30/MRPL17/MRPL23/MRPS36/MRPL40/MRPS11/MRPL54/MRPS26/MRPS16/MRPL20/MRPL21/MRPS14/MRPS23/MRPL53/MRPL19/MRPS12/MRPL30/MRPS7/MRPL44/MRPS15/MRPS6/MRPS5/MRPL43/MRPL13/MRP…	61
BP	GO:0043312	neutrophil degranulation	119/1297	485/17653	5.42804e-33	7.08846e-31	5.87048e-31	PKM/VCP/EEF2/EEF1A1/HSPA8/ANXA2/ALDOA/HSPA1A/HSPA1B/KRT1/CTSD/TUBB/CAT/HSP90AB1/TUBB4B/MVP/CKAP4/PSAP/PRDX4/PPIA/XRCC6/TXNDC5/RAB7A/DDOST/HSP90AA1/XRCC5/HMGB1/RAP1B/RHOA/DDX3X/IGF2R/ITGAV/PGRMC1/ALDOC/CCT2/ERP44/LGALS3/CD44/VCL/PA2G4/RAB5C/IQGAP1/RAB10/DNAJC3/RHOG/B2M/NRAS/CCT8/CTSA/HMOX2/VAPA/AP2A2/JUP/ANPEP/GSN/HRNR/CYB5R3/ADGRE5/ARL8A/CAP1/S100A11/FAF2/PGAM1/KPNB1/NME2/CD59/LPCAT1/SURF4/LAMP1/…	119
BP	GO:0002283	neutrophil activation involved in immune response	119/1297	488/17653	1.01886e-32	1.29727e-30	1.07437e-30	PKM/VCP/EEF2/EEF1A1/HSPA8/ANXA2/ALDOA/HSPA1A/HSPA1B/KRT1/CTSD/TUBB/CAT/HSP90AB1/TUBB4B/MVP/CKAP4/PSAP/PRDX4/PPIA/XRCC6/TXNDC5/RAB7A/DDOST/HSP90AA1/XRCC5/HMGB1/RAP1B/RHOA/DDX3X/IGF2R/ITGAV/PGRMC1/ALDOC/CCT2/ERP44/LGALS3/CD44/VCL/PA2G4/RAB5C/IQGAP1/RAB10/DNAJC3/RHOG/B2M/NRAS/CCT8/CTSA/HMOX2/VAPA/AP2A2/JUP/ANPEP/GSN/HRNR/CYB5R3/ADGRE5/ARL8A/CAP1/S100A11/FAF2/PGAM1/KPNB1/NME2/CD59/LPCAT1/SURF4/LAMP1/…	119
BP	GO:0006415	translational termination	52/1297	102/17653	4.47936e-32	5.56424e-30	4.60816e-30	EIF5A/MRPL12/ETF1/MRPS31/MRPL1/ABCE1/MRPL10/MRPL4/MRPL28/MRPS17/MRPL41/DAP3/MRPS27/MRPL46/MRPL37/MRPS18B/MRPL11/MRPS35/MRPL49/MRPS22/MRPL52/MRPL2/MRPS9/MRPS18C/PTCD3/MRPS30/MRPL17/MRPL23/MRPS36/GSPT1/UPF1/MRPL40/MRPS11/MRPL54/MRPS26/MRPS16/MRPL20/MRPL21/MRPS14/MRPS23/MRPL53/MRPL19/MRPS12/MRPL30/MRPS7/MRPL44/MRPS15/MRPS6/MRPS5/MRPL43/MRPL13/MRPS28	52
BP	GO:0042119	neutrophil activation	119/1297	498/17653	7.96502e-32	9.65853e-30	7.99895e-30	PKM/VCP/EEF2/EEF1A1/HSPA8/ANXA2/ALDOA/HSPA1A/HSPA1B/KRT1/CTSD/TUBB/CAT/HSP90AB1/TUBB4B/MVP/CKAP4/PSAP/PRDX4/PPIA/XRCC6/TXNDC5/RAB7A/DDOST/HSP90AA1/XRCC5/HMGB1/RAP1B/RHOA/DDX3X/IGF2R/ITGAV/PGRMC1/ALDOC/CCT2/ERP44/LGALS3/CD44/VCL/PA2G4/RAB5C/IQGAP1/RAB10/DNAJC3/RHOG/B2M/NRAS/CCT8/CTSA/HMOX2/VAPA/AP2A2/JUP/ANPEP/GSN/HRNR/CYB5R3/ADGRE5/ARL8A/CAP1/S100A11/FAF2/PGAM1/KPNB1/NME2/CD59/LPCAT1/SURF4/LAMP1/…	119
BP	GO:0002446	neutrophil mediated immunity	119/1297	500/17653	1.19251e-31	1.41243e-29	1.16974e-29	PKM/VCP/EEF2/EEF1A1/HSPA8/ANXA2/ALDOA/HSPA1A/HSPA1B/KRT1/CTSD/TUBB/CAT/HSP90AB1/TUBB4B/MVP/CKAP4/PSAP/PRDX4/PPIA/XRCC6/TXNDC5/RAB7A/DDOST/HSP90AA1/XRCC5/HMGB1/RAP1B/RHOA/DDX3X/IGF2R/ITGAV/PGRMC1/ALDOC/CCT2/ERP44/LGALS3/CD44/VCL/PA2G4/RAB5C/IQGAP1/RAB10/DNAJC3/RHOG/B2M/NRAS/CCT8/CTSA/HMOX2/VAPA/AP2A2/JUP/ANPEP/GSN/HRNR/CYB5R3/ADGRE5/ARL8A/CAP1/S100A11/FAF2/PGAM1/KPNB1/NME2/CD59/LPCAT1/SURF4/LAMP1/…	119
BP	GO:0032543	mitochondrial translation	57/1297	130/17653	1.38164e-30	1.59925e-28	1.32446e-28	LRPPRC/TUFM/C1QBP/IARS2/MRPL12/TSFM/MRPS31/MRPL1/GARS/GFM1/MRPL10/MRPL4/MRPL28/MRPS17/MRPL41/DAP3/MRPS27/MRPL46/MRPL37/MRPS18B/MRPL11/MRPS35/MRPL49/MRPS22/MRPL52/MRPL2/MRPS9/MRPS18C/PTCD3/MRPS30/COA3/MRPL17/MRPL23/MRPS36/GATB/MRPL40/MRPS11/MRPL54/MRPS26/MRPS16/MRPL20/MRPL21/MRPS14/MRPS23/MRPL53/MRPL19/MRPS12/MRPL30/MRPS7/MRPL44/MRPS15/TRMT10C/MRPS6/MRPS5/MRPL43/MRPL13/MRPS28	57
BP	GO:0070126	mitochondrial translational termination	47/1297	89/17653	5.13336e-30	5.80982e-28	4.81155e-28	MRPL12/MRPS31/MRPL1/MRPL10/MRPL4/MRPL28/MRPS17/MRPL41/DAP3/MRPS27/MRPL46/MRPL37/MRPS18B/MRPL11/MRPS35/MRPL49/MRPS22/MRPL52/MRPL2/MRPS9/MRPS18C/PTCD3/MRPS30/MRPL17/MRPL23/MRPS36/MRPL40/MRPS11/MRPL54/MRPS26/MRPS16/MRPL20/MRPL21/MRPS14/MRPS23/MRPL53/MRPL19/MRPS12/MRPL30/MRPS7/MRPL44/MRPS15/MRPS6/MRPS5/MRPL43/MRPL13/MRPS28	47
BP	GO:0006457	protein folding	80/1297	257/17653	5.79805e-30	6.41945e-28	5.31643e-28	HSPD1/HSPA5/HYOU1/GANAB/HSP90B1/HSPA9/PDIA4/VCP/PDIA3/P4HB/HSPA8/CALR/CANX/HSPA1A/HSPA1B/HSP90AB1/PDIA6/PRKCSH/PRDX4/PPIA/TXNDC5/GNB1/ERO1A/CCT7/HSP90AA1/PPIB/GNB2/HSPB1/TRAP1/CCT4/CCT2/CCT3/ERP44/ERP29/GRPEL1/UGGT1/TOMM70/GNAI2/TCP1/HSPE1/CCT6A/RPS27A/FKBP10/P3H1/B2M/FKBP2/CCT8/RUVBL2/PTGES3/EMC2/DNAJB11/LMAN1/GNAI3/MESD/STIP1/DNAJA2/FKBP8/HSPA4/FKBP3/TMX1/MOGS/PDIA5/MLEC/CCT5/ST13/TMX3/CSNK2A1/…	80
BP	GO:0140053	mitochondrial gene expression	61/1297	155/17653	1.84136e-29	1.99533e-27	1.65248e-27	LRPPRC/HSD17B10/TUFM/C1QBP/IARS2/MRPL12/TSFM/MRPS31/MRPL1/GARS/GFM1/MRPL10/MRPL4/MRPL28/MRPS17/MRPL41/DAP3/MRPS27/MRPL46/MRPL37/MRPS18B/MRPL11/MRPS35/MRPL49/PNPT1/MRPS22/TBRG4/MRPL52/MRPL2/MRPS9/MRPS18C/PTCD3/MRPS30/COA3/MRPL17/ELAC2/MRPL23/MRPS36/GATB/MRPL40/MRPS11/MRPL54/MRPS26/MRPS16/MRPL20/MRPL21/MRPS14/MRPS23/MRPL53/MRPL19/MRPS12/MRPL30/MRPS7/MRPL44/MRPS15/TRMT10C/MRPS6/MRPS5/MRPL43/MRPL13/M…	61
BP	GO:0034470	ncRNA processing	105/1297	425/17653	1.9159e-29	2.03285e-27	1.68355e-27	HSD17B10/RPL4/RPLP0/HNRNPA2B1/RPLP2/RPSA/RPL3/RPL7A/RPL9/RPL7/RPS4X/RPS3A/RPL15/RPS3/RPL6/RPS8/RPL10/RPS17/RPL23A/RPL5/RPL12/RPS2/PA2G4/RPL21/RPS19/RPS7/RPL8/DDX21/RPL22/DDX17/RPL27A/RPS27A/RPL19/RPS5/DDX1/RPS18/RPL18A/RPS14/RPL23/RPL13/RPL14/RPS10/RPL27/MRPL1/RPL28/NOLC1/RPLP1/RPL30/RPS12/RPS11/RPL24/RPS16/RPS23/RPS6/RPS13/RPL18/RPL17/RPS15/RPL36/RPL31/EIF6/RPL13A/GRSF1/RPL26/RPS9/RPL37A/RPL35/R…	105
BP	GO:0009060	aerobic respiration	45/1297	84/17653	3.76619e-29	3.91453e-27	3.24192e-27	VCP/CAT/IDH2/MDH2/UQCRC2/DLD/UQCRC1/SDHA/FH/ACO2/OGDH/CS/COX5A/COX6B1/DLST/DLAT/PDHB/SUCLG2/IDH3A/COX5B/COX4I1/NNT/IDH3B/UQCRB/UQCRH/COX2/SUCLG1/SIRT3/CYCS/SDHB/PDHA1/ME3/COX6A1/COX7A2L/MDH1/COX20/UQCR10/COX7C/IDH3G/COX7B/SUCLA2/PMPCB/NDUFA4/COX6C/COX3	45
BP	GO:0043624	cellular protein complex disassembly	67/1297	209/17653	4.2204e-26	4.2989e-24	3.56024e-24	HSPA8/EIF5A/CFL1/ASPH/RDX/MRPL12/ETF1/MRPS31/NSF/MRPL1/GSN/NAPA/ABCE1/MRPL10/MRPL4/MRPL28/MRPS17/DSTN/MRPL41/DAP3/MRPS27/MRPL46/MRPL37/CAPZB/CAPZA1/MRPS18B/MRPL11/MRPS35/MRPL49/CAPZA2/MRPS22/MRPL52/MRPL2/MRPS9/MRPS18C/PTCD3/SPTAN1/MRPS30/MRPL17/MRPL23/MRPS36/GSPT1/UPF1/MRPL40/MRPS11/MRPL54/MRPS26/MRPS16/MRPL20/MRPL21/MRPS14/MRPS23/MRPL53/MRPL19/LIMA1/MRPS12/KIF2C/MRPL30/PEX14/MRPS7/MRPL44/MRPS15/…	67
BP	GO:1990542	mitochondrial transmembrane transport	42/1297	93/17653	1.71126e-23	1.70891e-21	1.41527e-21	HSPD1/ATP5F1B/ATP5F1A/STOML2/TIMM50/ATP5PB/TOMM40/ATP5PO/SLC25A13/ATP5PD/GRPEL1/OPA1/ATP5PF/ATP5F1C/CYC1/TIMM13/ATP5F1D/COX5B/TOMM22/TIMM17A/CPT1A/TIMM44/TOMM20/ATP5MG/SLC25A12/ATP5ME/TIMM9/AGK/PNPT1/LETM1/ATP5MF/SLC25A1/SLC25A32/CHCHD4/MPC1/ATP8/ATP5F1E/ATP6/TOMM7/CPT2/NDUFA13/TIMM10	42
BP	GO:1903311	regulation of mRNA metabolic process	76/1297	289/17653	2.2934e-23	2.24621e-21	1.86025e-21	HSPA8/VIM/HSPA1A/NPM1/PTBP1/HNRNPK/HNRNPA2B1/PABPC1/YBX1/HNRNPU/YWHAZ/HNRNPA1/C1QBP/YWHAB/HSPB1/PABPC4/HNRNPL/SERBP1/IGF2BP3/SYNCRIP/IGF2BP2/IGF2BP1/SET/DDX17/RPS27A/PSMA7/SRSF7/TARDBP/HNRNPC/HNRNPA0/U2AF2/KHDRBS1/XPO1/ANP32A/PSMB6/PSME2/PSMC5/SRSF6/HNRNPR/PSMC4/SRSF9/YBX3/SRSF3/PSMA6/LARP1/THRAP3/KHSRP/DAZAP1/PNPT1/SF3A1/PSMA2/TBRG4/DDX5/SRSF2/HNRNPD/GIGYF2/SF3B4/RBMX/SRSF10/NUDT21/RBM4/PSMB7/EI…	76
BP	GO:0022618	ribonucleoprotein complex assembly	63/1297	211/17653	9.57613e-23	9.20212e-21	7.62096e-21	NPM1/HSP90AB1/RPSA/RPL3/HSP90AA1/C1QBP/DDX3X/RUVBL1/RPL6/RPL10/RPS17/RPL23A/RPL5/RPL12/RPS19/DDX39B/SRSF1/RPS5/DDX1/RPS14/EIF4B/RPS10/RUVBL2/PTGES3/RPL24/DDX6/RPS23/SF1/EIF4H/RPS15/EIF2S3/EIF6/SRSF6/RPL13A/SNRPD1/SNRPE/SRSF9/EIF3A/MCTS1/SF3A3/RPL11/MRPL11/RPS27/SF3A1/RPL38/LUC7L3/RPS28/ATXN2L/G3BP2/SNRPD2/SNRPC/RBMX/SRSF10/DYNC1H1/PRPF19/MRPS11/ATXN2/MRPL20/MRPS7/ADAR/SNRNP200/SNRPB/SNRPD3	63
BP	GO:0006839	mitochondrial transport	80/1297	328/17653	2.8774e-22	2.71381e-20	2.24751e-20	HSPD1/ATP5F1B/HSPA1A/ATP5F1A/STOML2/UQCRC2/TIMM50/ATP5PB/YWHAZ/HSP90AA1/TOMM40/YWHAB/YWHAG/ATP5PO/RUVBL1/SLC25A6/SLC25A13/YWHAQ/YWHAE/SLC25A5/ATP5PD/STAT3/GRPEL1/TOMM70/OPA1/ATP5PF/ATP5F1C/CYC1/TIMM13/SLC25A3/ATP5F1D/COX5B/TOMM22/SFN/YWHAH/TIMM17A/CPT1A/TIMM44/TOMM20/ACAA2/ATP5MG/SLC25A24/HSPA4/PITRM1/SLC25A22/SLC25A12/ATP5IF1/ATP5ME/SLC25A10/TIMM9/BID/AGK/CNP/PNPT1/LETM1/ATP5MF/SH3GLB1/FIS1/UBE2…	80
BP	GO:0007006	mitochondrial membrane organization	48/1297	132/17653	1.05502e-21	9.76946e-20	8.09082e-20	ATP5F1B/HSPA1A/ATP5F1A/TIMM50/ATP5PB/YWHAZ/HSP90AA1/IMMT/YWHAB/YWHAG/ATP5PO/SLC25A6/YWHAQ/YWHAE/SLC25A5/ATP5PD/STAT3/OPA1/ATP5PF/ATP5F1C/TIMM13/ATP5F1D/TOMM22/SFN/YWHAH/APOO/TOMM20/ACAA2/ATP5MG/HSPA4/ATP5IF1/CHCHD3/ATP5ME/TIMM9/BID/AGK/CNP/LETM1/ATP5MF/C19orf70/ATP8/ATP5F1E/ATP6/TOMM7/PPIF/NDUFA13/PDCD5/TIMM10	48
BP	GO:0032984	protein-containing complex disassembly	77/1297	314/17653	1.25619e-21	1.14246e-19	9.46154e-20	VCP/HSPA8/EIF5A/CFL1/ASPH/RDX/MRPL12/ETF1/SET/MRPS31/RPL23/NSF/PPP1CA/MRPL1/GSN/CAV1/NAPA/ABCE1/MRPL10/MRPL4/MRPL28/MRPS17/DSTN/MRPL41/DAP3/MRPS27/MRPL46/MRPL37/MCTS1/CAPZB/CAPZA1/MRPS18B/MRPL11/MRPS35/MRPL49/CAPZA2/MRPS22/LAMP2/MRPL52/MRPL2/MRPS9/MRPS18C/PTCD3/SPTAN1/MRPS30/GBA/VAMP8/MRPL17/MRPL23/MRPS36/GSPT1/UPF1/MRPL40/MRPS11/MRPL54/MRPS26/MRPS16/MRPL20/MRPL21/MRPS14/MRPS23/MRPL53/MRPL19/LIMA…	77
BP	GO:0034976	response to endoplasmic reticulum stress	71/1297	274/17653	1.67493e-21	1.49656e-19	1.23942e-19	HSPA5/HYOU1/HSP90B1/PDIA4/VCP/EEF2/PDIA3/P4HB/CALR/HSPA1A/PDIA6/AIFM1/TXNDC5/ERO1A/ATP2A2/AGR2/TLN1/ERP44/RACK1/BCAP31/ERP29/UGGT1/OPA1/TPP1/ACADVL/DNAJC3/CAV1/DNAJB11/NPLOC4/ATP6V0D1/FAF2/TRIM25/ERLIN1/HM13/PSMC5/MYDGF/PSMC4/PARK7/TMX1/PDIA5/SEC63/SEC31A/VAPB/HDGF/TXNDC12/EIF2S1/SEC61A1/TMX3/SRPRB/TMCO1/PTPN1/UBQLN2/DCTN1/TOR1A/UBXN4/UFM1/CCDC47/SEC61B/TMEM33/TNFRSF10B/SSR1/TBL2/DDRGK1/PSMC6/LMN…	71
BP	GO:0071826	ribonucleoprotein complex subunit organization	63/1297	223/17653	2.45053e-21	2.15182e-19	1.78208e-19	NPM1/HSP90AB1/RPSA/RPL3/HSP90AA1/C1QBP/DDX3X/RUVBL1/RPL6/RPL10/RPS17/RPL23A/RPL5/RPL12/RPS19/DDX39B/SRSF1/RPS5/DDX1/RPS14/EIF4B/RPS10/RUVBL2/PTGES3/RPL24/DDX6/RPS23/SF1/EIF4H/RPS15/EIF2S3/EIF6/SRSF6/RPL13A/SNRPD1/SNRPE/SRSF9/EIF3A/MCTS1/SF3A3/RPL11/MRPL11/RPS27/SF3A1/RPL38/LUC7L3/RPS28/ATXN2L/G3BP2/SNRPD2/SNRPC/RBMX/SRSF10/DYNC1H1/PRPF19/MRPS11/ATXN2/MRPL20/MRPS7/ADAR/SNRNP200/SNRPB/SNRPD3	63
BP	GO:0061077	chaperone-mediated protein folding	37/1297	80/17653	2.65775e-21	2.29422e-19	1.90002e-19	HSPD1/HSPA5/HYOU1/HSPA9/PDIA4/HSPA8/CALR/CANX/HSPA1A/HSPA1B/ERO1A/CCT7/PPIB/HSPB1/TRAP1/CCT4/CCT2/CCT3/TCP1/HSPE1/CCT6A/FKBP10/P3H1/FKBP2/CCT8/PTGES3/FKBP8/HSPA4/FKBP3/CCT5/ST13/CSNK2A1/TOR1A/CRTAP/FKBP9/DNAJB1/PDCD5	37
BP	GO:0006120	mitochondrial electron transport, NADH to ubiquinone	29/1297	52/17653	6.58238e-20	5.58735e-18	4.6273e-18	DLD/NDUFA5/NDUFS3/NDUFA8/NDUFAB1/NDUFB10/NDUFS1/NDUFV1/NDUFA10/NDUFA9/NDUFV2/PARK7/NDUFA2/NDUFB11/NDUFA11/NDUFB7/NDUFB4/NDUFS8/NDUFS2/NDUFS5/NDUFC2/NDUFA12/NDUFS6/NDUFA3/NDUFB3/NDUFB1/NDUFA4/NDUFB9/NDUFA13	29
BP	GO:0002478	antigen processing and presentation of exogenous peptide antigen	53/1297	174/17653	9.01391e-20	7.52588e-18	6.23274e-18	CLTC/PDIA3/CALR/CANX/CTSD/RAB7A/AP2B1/ITGAV/ACTR1A/B2M/PSMA7/VAMP3/AP2A2/AP1B1/CLTA/PSMB6/PSME2/PSMC5/SEC22B/PSMC4/CAPZB/CAPZA1/PSMA6/CAPZA2/SEC31A/SNAP23/PSMA2/AP1G1/DCTN1/VAMP8/ITGB5/DYNC1LI1/LGMN/TAPBP/DYNC1H1/PSMB7/PSMA1/SEC24C/PSMC6/PSMB2/DCTN2/IFI30/TAP1/AP2A1/KIF2C/PSMD4/PSMD8/SEC24B/PSMC3/PSMB4/PSMA4/PSMA5/KIF26A	53
BP	GO:0019882	antigen processing and presentation	60/1297	221/17653	1.93539e-19	1.58983e-17	1.31666e-17	CLTC/PDIA3/CALR/CANX/CTSD/RAB7A/ICAM1/AP2B1/ITGAV/BCAP31/RAB10/ACTR1A/B2M/PSMA7/VAMP3/AP2A2/AP1B1/CLTA/PSMB6/PSME2/PSMC5/SEC22B/PSMC4/CAPZB/CAPZA1/RAB6A/PSMA6/CAPZA2/SEC31A/SNAP23/PSMA2/AP1G1/DCTN1/VAMP8/ITGB5/DYNC1LI1/LGMN/RAB34/TAPBP/DYNC1H1/PSMB7/PSMA1/SEC24C/PSMC6/PSMB2/DCTN2/IFI30/TAP1/AP2A1/KIF2C/PSMD4/PSMD8/SEC24B/PSMC3/PSMB4/RAB32/PSMA4/PSMA5/KIF26A/NOD1	60
BP	GO:0043488	regulation of mRNA stability	50/1297	160/17653	2.93041e-19	2.36898e-17	1.96193e-17	HSPA8/VIM/HSPA1A/NPM1/PABPC1/YBX1/HNRNPU/YWHAZ/YWHAB/HSPB1/PABPC4/SERBP1/IGF2BP3/SYNCRIP/IGF2BP2/IGF2BP1/SET/RPS27A/PSMA7/TARDBP/HNRNPC/HNRNPA0/XPO1/ANP32A/PSMB6/PSME2/PSMC5/HNRNPR/PSMC4/YBX3/PSMA6/LARP1/THRAP3/KHSRP/PSMA2/TBRG4/HNRNPD/GIGYF2/PSMB7/EIF4G1/UPF1/PSMA1/PSMC6/PSMB2/PSMD4/PSMD8/PSMC3/PSMB4/PSMA4/PSMA5	50
BP	GO:0000375	RNA splicing, via transesterification reactions	75/1297	329/17653	4.14096e-19	3.2953e-17	2.72908e-17	HSPA8/PTBP1/HNRNPK/HNRNPA2B1/PABPC1/YBX1/HNRNPU/HNRNPA1/C1QBP/HNRNPH1/HNRNPL/PCBP2/HNRNPF/HNRNPA3/SYNCRIP/PCBP1/SRRM2/FUS/DDX39B/DDX17/SRSF1/HNRNPM/DDX1/SRSF7/HNRNPC/HNRNPA0/U2AF2/KHDRBS1/ALYREF/SF1/SFPQ/SRSF6/HNRNPR/SNRPD1/SNRPE/DDX39A/NONO/SRSF9/U2AF1/U2AF1L5/SF3A3/SRSF3/THRAP3/KHSRP/DAZAP1/SRRM1/SF3A1/LUC7L3/DDX5/HNRNPH3/SRSF2/HNRNPD/SNRPD2/SNRPC/SF3B4/RBMX/SRSF10/NUDT21/RBM4/LSM7/PRPF19/DNAJC…	75
BP	GO:0048002	antigen processing and presentation of peptide antigen	54/1297	187/17653	6.04968e-19	4.74016e-17	3.92568e-17	CLTC/PDIA3/CALR/CANX/CTSD/RAB7A/AP2B1/ITGAV/BCAP31/ACTR1A/B2M/PSMA7/VAMP3/AP2A2/AP1B1/CLTA/PSMB6/PSME2/PSMC5/SEC22B/PSMC4/CAPZB/CAPZA1/PSMA6/CAPZA2/SEC31A/SNAP23/PSMA2/AP1G1/DCTN1/VAMP8/ITGB5/DYNC1LI1/LGMN/TAPBP/DYNC1H1/PSMB7/PSMA1/SEC24C/PSMC6/PSMB2/DCTN2/IFI30/TAP1/AP2A1/KIF2C/PSMD4/PSMD8/SEC24B/PSMC3/PSMB4/PSMA4/PSMA5/KIF26A	54
BP	GO:0019884	antigen processing and presentation of exogenous antigen	53/1297	181/17653	6.46261e-19	4.98698e-17	4.13009e-17	CLTC/PDIA3/CALR/CANX/CTSD/RAB7A/AP2B1/ITGAV/ACTR1A/B2M/PSMA7/VAMP3/AP2A2/AP1B1/CLTA/PSMB6/PSME2/PSMC5/SEC22B/PSMC4/CAPZB/CAPZA1/PSMA6/CAPZA2/SEC31A/SNAP23/PSMA2/AP1G1/DCTN1/VAMP8/ITGB5/DYNC1LI1/LGMN/TAPBP/DYNC1H1/PSMB7/PSMA1/SEC24C/PSMC6/PSMB2/DCTN2/IFI30/TAP1/AP2A1/KIF2C/PSMD4/PSMD8/SEC24B/PSMC3/PSMB4/PSMA4/PSMA5/KIF26A	53
BP	GO:0000377	RNA splicing, via transesterification reactions with bulged adenosine as nucleophile	74/1297	326/17653	9.29388e-19	6.96085e-17	5.7648e-17	HSPA8/PTBP1/HNRNPK/HNRNPA2B1/PABPC1/YBX1/HNRNPU/HNRNPA1/C1QBP/HNRNPH1/HNRNPL/PCBP2/HNRNPF/HNRNPA3/SYNCRIP/PCBP1/SRRM2/FUS/DDX39B/DDX17/SRSF1/HNRNPM/DDX1/SRSF7/HNRNPC/HNRNPA0/U2AF2/KHDRBS1/ALYREF/SF1/SFPQ/SRSF6/HNRNPR/SNRPD1/SNRPE/DDX39A/NONO/SRSF9/U2AF1/U2AF1L5/SF3A3/SRSF3/THRAP3/DAZAP1/SRRM1/SF3A1/LUC7L3/DDX5/HNRNPH3/SRSF2/HNRNPD/SNRPD2/SNRPC/SF3B4/RBMX/SRSF10/NUDT21/RBM4/LSM7/PRPF19/DNAJC8/DHX1…	74
BP	GO:0000398	mRNA splicing, via spliceosome	74/1297	326/17653	9.29388e-19	6.96085e-17	5.7648e-17	HSPA8/PTBP1/HNRNPK/HNRNPA2B1/PABPC1/YBX1/HNRNPU/HNRNPA1/C1QBP/HNRNPH1/HNRNPL/PCBP2/HNRNPF/HNRNPA3/SYNCRIP/PCBP1/SRRM2/FUS/DDX39B/DDX17/SRSF1/HNRNPM/DDX1/SRSF7/HNRNPC/HNRNPA0/U2AF2/KHDRBS1/ALYREF/SF1/SFPQ/SRSF6/HNRNPR/SNRPD1/SNRPE/DDX39A/NONO/SRSF9/U2AF1/U2AF1L5/SF3A3/SRSF3/THRAP3/DAZAP1/SRRM1/SF3A1/LUC7L3/DDX5/HNRNPH3/SRSF2/HNRNPD/SNRPD2/SNRPC/SF3B4/RBMX/SRSF10/NUDT21/RBM4/LSM7/PRPF19/DNAJC8/DHX1…	74
BP	GO:0007007	inner mitochondrial membrane organization	25/1297	41/17653	1.1832e-18	8.7334e-17	7.23278e-17	ATP5F1B/ATP5F1A/ATP5PB/IMMT/ATP5PO/ATP5PD/OPA1/ATP5PF/ATP5F1C/TIMM13/ATP5F1D/APOO/ATP5MG/CHCHD3/ATP5ME/TIMM9/AGK/LETM1/ATP5MF/C19orf70/ATP8/ATP5F1E/ATP6/NDUFA13/TIMM10	25
BP	GO:0043487	regulation of RNA stability	50/1297	168/17653	2.98851e-18	2.17435e-16	1.80075e-16	HSPA8/VIM/HSPA1A/NPM1/PABPC1/YBX1/HNRNPU/YWHAZ/YWHAB/HSPB1/PABPC4/SERBP1/IGF2BP3/SYNCRIP/IGF2BP2/IGF2BP1/SET/RPS27A/PSMA7/TARDBP/HNRNPC/HNRNPA0/XPO1/ANP32A/PSMB6/PSME2/PSMC5/HNRNPR/PSMC4/YBX3/PSMA6/LARP1/THRAP3/KHSRP/PSMA2/TBRG4/HNRNPD/GIGYF2/PSMB7/EIF4G1/UPF1/PSMA1/PSMC6/PSMB2/PSMD4/PSMD8/PSMC3/PSMB4/PSMA4/PSMA5	50
BP	GO:0008380	RNA splicing	86/1297	432/17653	9.08677e-18	6.51816e-16	5.39817e-16	AHNAK/HSPA8/HSPA1A/PTBP1/HNRNPK/HNRNPA2B1/PABPC1/YBX1/HNRNPU/HNRNPA1/C1QBP/HNRNPH1/HNRNPL/PCBP2/HNRNPF/LGALS3/HNRNPA3/SYNCRIP/PCBP1/SRRM2/FUS/DDX39B/DDX17/SRSF1/HNRNPM/DDX1/SRSF7/TARDBP/HNRNPC/HNRNPA0/U2AF2/KHDRBS1/ALYREF/SF1/RPS13/SFPQ/SRSF6/HNRNPR/SNRPD1/SNRPE/AHNAK2/DDX39A/NONO/SRSF9/RTRAF/RPS26/RTCB/U2AF1/U2AF1L5/SF3A3/SRSF3/THRAP3/KHSRP/DAZAP1/SRRM1/SF3A1/LUC7L3/DDX5/HNRNPH3/SRSF2/HNRNPD/C2o…	86
BP	GO:0010257	NADH dehydrogenase complex assembly	30/1297	64/17653	9.83606e-18	6.86234e-16	5.68322e-16	NDUFA5/NDUFS3/NDUFA8/NDUFAB1/NDUFB10/NDUFS1/NDUFV1/NDUFA10/NDUFA9/NDUFV2/ACAD9/BCS1L/NDUFA2/NDUFB11/NDUFA11/NDUFAF2/NDUFB7/NDUFB4/NDUFS8/NDUFS2/NDUFS5/NDUFC2/NDUFAF3/NDUFA12/NDUFS6/NDUFA3/NDUFB3/NDUFB1/NDUFB9/NDUFA13	30
BP	GO:0032981	mitochondrial respiratory chain complex I assembly	30/1297	64/17653	9.83606e-18	6.86234e-16	5.68322e-16	NDUFA5/NDUFS3/NDUFA8/NDUFAB1/NDUFB10/NDUFS1/NDUFV1/NDUFA10/NDUFA9/NDUFV2/ACAD9/BCS1L/NDUFA2/NDUFB11/NDUFA11/NDUFAF2/NDUFB7/NDUFB4/NDUFS8/NDUFS2/NDUFS5/NDUFC2/NDUFAF3/NDUFA12/NDUFS6/NDUFA3/NDUFB3/NDUFB1/NDUFB9/NDUFA13	30
BP	GO:0006099	tricarboxylic acid cycle	21/1297	30/17653	9.97505e-18	6.86526e-16	5.68563e-16	IDH2/MDH2/DLD/SDHA/FH/ACO2/OGDH/CS/DLST/DLAT/PDHB/SUCLG2/IDH3A/NNT/IDH3B/SUCLG1/SDHB/PDHA1/MDH1/IDH3G/SUCLA2	21
BP	GO:0061013	regulation of mRNA catabolic process	51/1297	181/17653	1.82541e-17	1.23958e-15	1.02659e-15	HSPA8/VIM/HSPA1A/NPM1/PABPC1/YBX1/HNRNPU/YWHAZ/YWHAB/HSPB1/PABPC4/SERBP1/IGF2BP3/SYNCRIP/IGF2BP2/IGF2BP1/SET/RPS27A/PSMA7/TARDBP/HNRNPC/HNRNPA0/XPO1/ANP32A/PSMB6/PSME2/PSMC5/HNRNPR/PSMC4/YBX3/PSMA6/LARP1/THRAP3/KHSRP/PNPT1/PSMA2/TBRG4/HNRNPD/GIGYF2/PSMB7/EIF4G1/UPF1/PSMA1/PSMC6/PSMB2/PSMD4/PSMD8/PSMC3/PSMB4/PSMA4/PSMA5	51
BP	GO:0006986	response to unfolded protein	50/1297	179/17653	5.62137e-17	3.76705e-15	3.11978e-15	HSPD1/HSPA5/HYOU1/HSP90B1/HSPA9/VCP/HSPA8/CALR/HSPA1A/HSPA1B/HSP90AB1/PDIA6/ERO1A/HSP90AA1/SERPINH1/HSPB1/AGR2/TLN1/ERP44/RACK1/UGGT1/TPP1/HSPE1/ACADVL/DNAJC3/DNAJB11/ATP6V0D1/FAF2/MYDGF/HSPA4/PDIA5/SEC63/SEC31A/VAPB/HDGF/EIF2S1/SEC61A1/SRPRB/PTPN1/DCTN1/UBXN4/SEC61B/TMEM33/SSR1/TBL2/LMNA/DNAJB1/DERL2/SRPRA/DERL1	50
BP	GO:0042776	mitochondrial ATP synthesis coupled proton transport	17/1297	21/17653	2.16481e-16	1.43187e-14	1.18584e-14	ATP5F1B/ATP5F1A/STOML2/ATP5PB/ATP5PO/ATP5PD/ATP5PF/ATP5F1C/CYC1/ATP5F1D/COX5B/ATP5MG/ATP5ME/ATP5MF/ATP8/ATP5F1E/ATP6	17
BP	GO:0006101	citrate metabolic process	21/1297	34/17653	4.86065e-16	3.17376e-14	2.62843e-14	IDH2/MDH2/DLD/SDHA/FH/ACO2/OGDH/CS/DLST/DLAT/PDHB/SUCLG2/IDH3A/NNT/IDH3B/SUCLG1/SDHB/PDHA1/MDH1/IDH3G/SUCLA2	21
BP	GO:0072350	tricarboxylic acid metabolic process	22/1297	38/17653	6.79166e-16	4.37847e-14	3.62614e-14	IDH2/MDH2/DLD/SDHA/FH/GLUD1/ACO2/OGDH/CS/DLST/DLAT/PDHB/SUCLG2/IDH3A/NNT/IDH3B/SUCLG1/SDHB/PDHA1/MDH1/IDH3G/SUCLA2	22
BP	GO:0035966	response to topologically incorrect protein	51/1297	198/17653	1.09192e-15	6.86775e-14	5.6877e-14	HSPD1/HSPA5/HYOU1/HSP90B1/HSPA9/VCP/HSPA8/CALR/HSPA1A/HSPA1B/HSP90AB1/PDIA6/ERO1A/HSP90AA1/SERPINH1/HSPB1/AGR2/TLN1/ERP44/RACK1/UGGT1/TPP1/HSPE1/ACADVL/DNAJC3/DNAJB11/ATP6V0D1/FAF2/MYDGF/HSPA4/PDIA5/SEC63/SEC31A/VAPB/HDGF/EIF2S1/SEC61A1/SRPRB/PTPN1/DCTN1/TOR1A/UBXN4/SEC61B/TMEM33/SSR1/TBL2/LMNA/DNAJB1/DERL2/SRPRA/DERL1	51
BP	GO:0002474	antigen processing and presentation of peptide antigen via MHC class I	34/1297	94/17653	1.09226e-15	6.86775e-14	5.6877e-14	PDIA3/CALR/CANX/ITGAV/BCAP31/B2M/PSMA7/VAMP3/PSMB6/PSME2/PSMC5/SEC22B/PSMC4/PSMA6/SEC31A/SNAP23/PSMA2/VAMP8/ITGB5/TAPBP/PSMB7/PSMA1/SEC24C/PSMC6/PSMB2/IFI30/TAP1/PSMD4/PSMD8/SEC24B/PSMC3/PSMB4/PSMA4/PSMA5	34
BP	GO:1902036	regulation of hematopoietic stem cell differentiation	35/1297	103/17653	3.8352e-15	2.38204e-13	1.97274e-13	HSPA9/RPS27A/PSMA7/PSMB6/PSME2/PSMC5/PSMC4/H3F3A/H3F3B/PSMA6/HIST1H4I/HIST1H4A/HIST1H4D/HIST1H4F/HIST1H4K/HIST1H4J/HIST1H4C/HIST1H4H/HIST1H4B/HIST1H4E/HIST1H4L/HIST2H4A/HIST4H4/HIST2H4B/PSMA2/PSMB7/PSMA1/PSMC6/PSMB2/PSMD4/PSMD8/PSMC3/PSMB4/PSMA4/PSMA5	35
BP	GO:0033108	mitochondrial respiratory chain complex assembly	34/1297	98/17653	4.65378e-15	2.85563e-13	2.36496e-13	NDUFA5/NDUFS3/NDUFA8/NDUFAB1/NDUFB10/UQCRB/NDUFS1/NDUFV1/NDUFA10/NDUFA9/NDUFV2/ACAD9/BCS1L/NDUFA2/NDUFB11/NDUFA11/NDUFAF2/NDUFB7/NDUFB4/COX20/UQCR10/NDUFS8/COA3/NDUFS2/NDUFS5/NDUFC2/NDUFAF3/NDUFA12/NDUFS6/NDUFA3/NDUFB3/NDUFB1/NDUFB9/NDUFA13	34
BP	GO:0006403	RNA localization	55/1297	233/17653	4.8906e-15	2.96522e-13	2.45572e-13	LRPPRC/NPM1/MVP/HNRNPA2B1/EIF5A/CCT7/RPSA/HNRNPU/HNRNPA1/CCT4/RUVBL1/CCT2/CCT3/IGF2BP3/TCP1/IGF2BP2/IGF2BP1/DDX39B/CCT6A/SRSF1/CCT8/SRSF7/RUVBL2/RAN/U2AF2/KHDRBS1/ALYREF/XPO1/RPS15/ABCE1/EIF6/SRSF6/TOMM20/DDX39A/SRSF9/RTRAF/U2AF1/SSB/SRSF3/CCT5/KHSRP/PNPT1/SRRM1/RANBP1/SRSF2/G3BP2/FBL/SRSF10/AGFG1/UPF1/SARNP/ATXN2/EIF4E/RANBP2/MAGOHB	55
BP	GO:1902600	proton transmembrane transport	42/1297	146/17653	5.70409e-15	3.41775e-13	2.8305e-13	ACTN4/ATP5F1B/ATP5F1A/STOML2/ATP5PB/ATP1A1/ATP5PO/COX5A/COX6B1/ATP5PD/ATP5PF/ATP5F1C/CYC1/SLC25A3/ATP5F1D/COX5B/COX4I1/NNT/C15orf48/ATP6V0D1/COX2/ATP5MG/SLC25A22/PARK7/ATP5ME/CHP1/ATP5MF/COX7A2/COX6A1/COX7A2L/COX7C/CYB5A/COX7B/ATP8/ATP5F1E/ATP6/ATP6V1A/SLC9A3R1/NDUFA4/PPIF/COX6C/COX3	42
BP	GO:0006520	cellular amino acid metabolic process	72/1297	367/17653	1.00481e-14	5.9506e-13	4.92814e-13	P4HB/HSD17B10/OAT/P4HA1/DLD/ACAT1/PLOD2/PRDX4/SHMT2/GLUD1/ERO1A/OGDH/IARS2/PPA2/MTHFD1/GOT2/PYCR1/DLST/SARS2/HIBADH/ALDH18A1/PSMA7/MCCC2/GARS/COMT/PYCR2/PSMB6/PSME2/PSMC5/QARS/ALDH4A1/GLS/PLOD1/PSMC4/PARK7/GMPS/CTPS1/ACADSB/IVD/PSMA6/PCYOX1/HMGCL/PSMA2/GCSH/FARSA/VARS/GCDH/EPRS/SLC25A32/CRTAP/CPOX/GART/AIMP1/LRRC47/PSMB7/GATB/YARS/PSMA1/FARSB/PSMC6/PSMB2/KARS/PPA1/PSMD4/PSMD8/PSMC3/PSMB4/PSMA4/PS…	72
BP	GO:0048193	Golgi vesicle transport	71/1297	360/17653	1.16984e-14	6.84827e-13	5.67157e-13	HYOU1/VCP/KRT18/RACK1/BCAP31/RAB1B/COPG1/TMED10/RAB10/RAB1A/ACTR1A/TMED4/TMED9/VAPA/VAMP3/NSF/GOLPH3/COPE/COPB2/NAPA/LMAN1/ARF3/ARCN1/COPA/ERGIC1/LMAN2/SEC22B/CD59/SURF4/SCAMP3/LAMP1/TICAM2/SAR1A/RAB14/CAPZB/CAPZA1/MCFD2/RAB6A/COPB1/COPZ1/TMED2/CAPZA2/SEC31A/VAPB/IER3IP1/SNAP23/TMED5/ACSL3/STX6/ARF5/SCAMP1/AP1G1/RAB8A/CORO7/SPTAN1/DCTN1/VAMP8/DYNC1LI1/RAB34/TAPBP/DYNC1H1/RER1/SEC24C/TGOLN2/DCTN2/…	71
BP	GO:0060218	hematopoietic stem cell differentiation	36/1297	113/17653	1.53313e-14	8.87301e-13	7.34841e-13	HSPA9/XRCC5/RPS27A/PSMA7/PSMB6/PSME2/PSMC5/PSMC4/H3F3A/H3F3B/PSMA6/HIST1H4I/HIST1H4A/HIST1H4D/HIST1H4F/HIST1H4K/HIST1H4J/HIST1H4C/HIST1H4H/HIST1H4B/HIST1H4E/HIST1H4L/HIST2H4A/HIST4H4/HIST2H4B/PSMA2/PSMB7/PSMA1/PSMC6/PSMB2/PSMD4/PSMD8/PSMC3/PSMB4/PSMA4/PSMA5	36
BP	GO:0042255	ribosome assembly	26/1297	61/17653	2.57305e-14	1.47242e-12	1.21942e-12	NPM1/RPSA/RPL3/C1QBP/DDX3X/RPL6/RPL10/RPS17/RPL23A/RPL5/RPL12/RPS19/RPS5/RPS14/RPS10/RPL24/RPS15/EIF6/RPL11/MRPL11/RPS27/RPL38/RPS28/MRPS11/MRPL20/MRPS7	26
BP	GO:0042407	cristae formation	19/1297	32/17653	3.47838e-14	1.96838e-12	1.63016e-12	ATP5F1B/ATP5F1A/ATP5PB/IMMT/ATP5PO/ATP5PD/ATP5PF/ATP5F1C/ATP5F1D/APOO/ATP5MG/CHCHD3/ATP5ME/LETM1/ATP5MF/C19orf70/ATP8/ATP5F1E/ATP6	19
BP	GO:0006397	mRNA processing	86/1297	495/17653	4.11766e-14	2.30453e-12	1.90856e-12	HSPA8/HSPA1A/PTBP1/HNRNPK/HNRNPA2B1/PABPC1/YBX1/HNRNPU/HNRNPA1/C1QBP/HNRNPH1/HNRNPL/PCBP2/HNRNPF/LGALS3/HNRNPA3/SYNCRIP/PCBP1/SRRM2/FUS/DDX39B/DDX17/SRSF1/HNRNPM/DDX1/SRSF7/TARDBP/HNRNPC/HNRNPA0/U2AF2/KHDRBS1/ALYREF/SF1/SFPQ/SRSF6/GRSF1/HNRNPR/SNRPD1/SNRPE/DDX39A/NONO/SRSF9/U2AF1/U2AF1L5/SF3A3/SRSF3/THRAP3/KHSRP/DAZAP1/PNPT1/SRRM1/SF3A1/TBRG4/LUC7L3/DDX5/HNRNPH3/SRSF2/HNRNPD/SNRPD2/SNRPC/SF3B4/RB…	86
BP	GO:0006458	'de novo' protein folding	24/1297	53/17653	4.88118e-14	2.70216e-12	2.23786e-12	HSPD1/HSPA5/HYOU1/HSPA9/HSPA8/HSPA1A/HSPA1B/ERO1A/CCT7/CCT4/CCT2/CCT3/UGGT1/TCP1/HSPE1/CCT6A/CCT8/PTGES3/HSPA4/CCT5/ST13/TOR1A/CHCHD4/DNAJB1	24
BP	GO:0042590	antigen processing and presentation of exogenous peptide antigen via MHC class I	29/1297	78/17653	6.04293e-14	3.30932e-12	2.74069e-12	PDIA3/CALR/ITGAV/B2M/PSMA7/VAMP3/PSMB6/PSME2/PSMC5/SEC22B/PSMC4/PSMA6/SNAP23/PSMA2/VAMP8/ITGB5/TAPBP/PSMB7/PSMA1/PSMC6/PSMB2/IFI30/TAP1/PSMD4/PSMD8/PSMC3/PSMB4/PSMA4/PSMA5	29
BP	GO:1901532	regulation of hematopoietic progenitor cell differentiation	35/1297	112/17653	6.82556e-14	3.69815e-12	3.06271e-12	HSPA9/RPS27A/PSMA7/PSMB6/PSME2/PSMC5/PSMC4/H3F3A/H3F3B/PSMA6/HIST1H4I/HIST1H4A/HIST1H4D/HIST1H4F/HIST1H4K/HIST1H4J/HIST1H4C/HIST1H4H/HIST1H4B/HIST1H4E/HIST1H4L/HIST2H4A/HIST4H4/HIST2H4B/PSMA2/PSMB7/PSMA1/PSMC6/PSMB2/PSMD4/PSMD8/PSMC3/PSMB4/PSMA4/PSMA5	35
BP	GO:0071806	protein transmembrane transport	25/1297	59/17653	9.54772e-14	5.11858e-12	4.23908e-12	HSPD1/HYOU1/HSPA8/TIMM50/TOMM40/SRP72/GRPEL1/TOMM70/TIMM13/TOMM22/TIMM17A/TIMM44/TOMM20/SEC63/TIMM9/SRP9/AGK/CHCHD4/SEC61B/SRP19/PEX14/SRP54/TOMM7/NDUFA13/TIMM10	25
BP	GO:0009156	ribonucleoside monophosphate biosynthetic process	45/1297	178/17653	1.09829e-13	5.82666e-12	4.8255e-12	ATP5F1B/PKM/VCP/ENO1/ALDOA/GAPDH/ATP5F1A/STOML2/PGK1/OGDH/ATP5PB/LDHA/AK2/ATP5PO/SLC25A13/ALDOC/ATP5PD/STAT3/ATP5PF/TPI1/PAICS/ATP5F1C/CYC1/ATP5F1D/COX5B/PARP1/PRPS1/HK1/PGAM1/EIF6/ATP5MG/GMPS/ATP5ME/NIPSNAP2/PFKP/ATP5MF/GART/GPI/ATP8/UPP1/ATP5F1E/ATP6/LHPP/RANBP2/APRT	45
BP	GO:0009127	purine nucleoside monophosphate biosynthetic process	43/1297	165/17653	1.24166e-13	6.45281e-12	5.34405e-12	ATP5F1B/PKM/VCP/ENO1/ALDOA/GAPDH/ATP5F1A/STOML2/PGK1/OGDH/ATP5PB/LDHA/AK2/ATP5PO/SLC25A13/ALDOC/ATP5PD/STAT3/ATP5PF/TPI1/PAICS/ATP5F1C/CYC1/ATP5F1D/COX5B/PARP1/HK1/PGAM1/EIF6/ATP5MG/GMPS/ATP5ME/NIPSNAP2/PFKP/ATP5MF/GART/GPI/ATP8/ATP5F1E/ATP6/LHPP/RANBP2/APRT	43
BP	GO:0009168	purine ribonucleoside monophosphate biosynthetic process	43/1297	165/17653	1.24166e-13	6.45281e-12	5.34405e-12	ATP5F1B/PKM/VCP/ENO1/ALDOA/GAPDH/ATP5F1A/STOML2/PGK1/OGDH/ATP5PB/LDHA/AK2/ATP5PO/SLC25A13/ALDOC/ATP5PD/STAT3/ATP5PF/TPI1/PAICS/ATP5F1C/CYC1/ATP5F1D/COX5B/PARP1/HK1/PGAM1/EIF6/ATP5MG/GMPS/ATP5ME/NIPSNAP2/PFKP/ATP5MF/GART/GPI/ATP8/ATP5F1E/ATP6/LHPP/RANBP2/APRT	43
BP	GO:0002479	antigen processing and presentation of exogenous peptide antigen via MHC class I, TAP-dependent	28/1297	75/17653	1.45135e-13	7.4664e-12	6.18348e-12	PDIA3/CALR/ITGAV/B2M/PSMA7/VAMP3/PSMB6/PSME2/PSMC5/SEC22B/PSMC4/PSMA6/SNAP23/PSMA2/VAMP8/ITGB5/TAPBP/PSMB7/PSMA1/PSMC6/PSMB2/TAP1/PSMD4/PSMD8/PSMC3/PSMB4/PSMA4/PSMA5	28
BP	GO:0009124	nucleoside monophosphate biosynthetic process	46/1297	189/17653	2.60388e-13	1.32616e-11	1.09829e-11	ATP5F1B/PKM/VCP/ENO1/ALDOA/GAPDH/ATP5F1A/STOML2/PGK1/OGDH/ATP5PB/LDHA/AK2/ATP5PO/SLC25A13/ALDOC/ATP5PD/STAT3/ATP5PF/TPI1/PAICS/ATP5F1C/CYC1/ATP5F1D/COX5B/PARP1/PRPS1/HK1/PGAM1/EIF6/ATP5MG/GMPS/ATP5ME/NIPSNAP2/PFKP/ATP5MF/GART/GPI/ATP8/UPP1/ATP5F1E/ATP6/LHPP/RANBP2/APRT/HDDC2	46
BP	GO:0045653	negative regulation of megakaryocyte differentiation	14/1297	18/17653	2.89074e-13	1.45768e-11	1.20721e-11	HIST1H4I/HIST1H4A/HIST1H4D/HIST1H4F/HIST1H4K/HIST1H4J/HIST1H4C/HIST1H4H/HIST1H4B/HIST1H4E/HIST1H4L/HIST2H4A/HIST4H4/HIST2H4B	14
BP	GO:0065002	intracellular protein transmembrane transport	23/1297	52/17653	3.06642e-13	1.5311e-11	1.26802e-11	HSPD1/HYOU1/TIMM50/TOMM40/SRP72/GRPEL1/TIMM13/TOMM22/TIMM17A/TIMM44/TOMM20/SEC63/TIMM9/SRP9/AGK/CHCHD4/SEC61B/SRP19/PEX14/SRP54/TOMM7/NDUFA13/TIMM10	23
BP	GO:0034620	cellular response to unfolded protein	40/1297	149/17653	3.10918e-13	1.53738e-11	1.27322e-11	HSPA5/HYOU1/HSP90B1/HSPA9/VCP/HSPA8/CALR/HSPA1A/HSPA1B/PDIA6/ERO1A/AGR2/TLN1/RACK1/UGGT1/TPP1/ACADVL/DNAJC3/DNAJB11/ATP6V0D1/MYDGF/HSPA4/PDIA5/SEC63/SEC31A/VAPB/HDGF/EIF2S1/SEC61A1/SRPRB/PTPN1/DCTN1/SEC61B/TMEM33/SSR1/TBL2/LMNA/DERL2/SRPRA/DERL1	40
BP	GO:0009142	nucleoside triphosphate biosynthetic process	43/1297	171/17653	4.71763e-13	2.2717e-11	1.88136e-11	ATP5F1B/PKM/VCP/ENO1/ALDOA/GAPDH/ATP5F1A/STOML2/PGK1/OGDH/ATP5PB/LDHA/ATP5PO/SLC25A13/ALDOC/ATP5PD/STAT3/ATP5PF/TPI1/ATP5F1C/CYC1/ATP5F1D/COX5B/PARP1/HK1/PGAM1/NME2/EIF6/NME1/ATP5MG/SUCLG1/ATP5ME/NME3/CTPS1/NIPSNAP2/PFKP/ATP5MF/GPI/ATP8/ATP5F1E/ATP6/RANBP2/AK4	43
BP	GO:0015985	energy coupled proton transport, down electrochemical gradient	17/1297	28/17653	4.72805e-13	2.2717e-11	1.88136e-11	ATP5F1B/ATP5F1A/STOML2/ATP5PB/ATP5PO/ATP5PD/ATP5PF/ATP5F1C/CYC1/ATP5F1D/COX5B/ATP5MG/ATP5ME/ATP5MF/ATP8/ATP5F1E/ATP6	17
BP	GO:0015986	ATP synthesis coupled proton transport	17/1297	28/17653	4.72805e-13	2.2717e-11	1.88136e-11	ATP5F1B/ATP5F1A/STOML2/ATP5PB/ATP5PO/ATP5PD/ATP5PF/ATP5F1C/CYC1/ATP5F1D/COX5B/ATP5MG/ATP5ME/ATP5MF/ATP8/ATP5F1E/ATP6	17
BP	GO:0043484	regulation of RNA splicing	35/1297	120/17653	6.69382e-13	3.17823e-11	2.63213e-11	AHNAK/HSPA8/HSPA1A/PTBP1/HNRNPK/HNRNPA2B1/HNRNPU/HNRNPA1/C1QBP/HNRNPH1/HNRNPL/HNRNPF/DDX17/SRSF1/SRSF7/U2AF2/KHDRBS1/RPS13/SRSF6/AHNAK2/SRSF9/RPS26/SRSF3/THRAP3/DAZAP1/SF3A1/DDX5/SRSF2/SF3B4/RBMX/SRSF10/RBM4/PRPF19/SNRNP70/TRA2B	35
BP	GO:0009201	ribonucleoside triphosphate biosynthetic process	41/1297	159/17653	6.73961e-13	3.17823e-11	2.63213e-11	ATP5F1B/PKM/VCP/ENO1/ALDOA/GAPDH/ATP5F1A/STOML2/PGK1/OGDH/ATP5PB/LDHA/ATP5PO/SLC25A13/ALDOC/ATP5PD/STAT3/ATP5PF/TPI1/ATP5F1C/CYC1/ATP5F1D/COX5B/PARP1/HK1/PGAM1/NME2/EIF6/NME1/ATP5MG/ATP5ME/NME3/CTPS1/NIPSNAP2/PFKP/ATP5MF/GPI/ATP8/ATP5F1E/ATP6/RANBP2	41
BP	GO:0009206	purine ribonucleoside triphosphate biosynthetic process	40/1297	153/17653	7.9408e-13	3.71032e-11	3.0728e-11	ATP5F1B/PKM/VCP/ENO1/ALDOA/GAPDH/ATP5F1A/STOML2/PGK1/OGDH/ATP5PB/LDHA/ATP5PO/SLC25A13/ALDOC/ATP5PD/STAT3/ATP5PF/TPI1/ATP5F1C/CYC1/ATP5F1D/COX5B/PARP1/HK1/PGAM1/NME2/EIF6/NME1/ATP5MG/ATP5ME/NME3/NIPSNAP2/PFKP/ATP5MF/GPI/ATP8/ATP5F1E/ATP6/RANBP2	40
BP	GO:0009145	purine nucleoside triphosphate biosynthetic process	40/1297	154/17653	9.98018e-13	4.62082e-11	3.82685e-11	ATP5F1B/PKM/VCP/ENO1/ALDOA/GAPDH/ATP5F1A/STOML2/PGK1/OGDH/ATP5PB/LDHA/ATP5PO/SLC25A13/ALDOC/ATP5PD/STAT3/ATP5PF/TPI1/ATP5F1C/CYC1/ATP5F1D/COX5B/PARP1/HK1/PGAM1/NME2/EIF6/NME1/ATP5MG/ATP5ME/NME3/NIPSNAP2/PFKP/ATP5MF/GPI/ATP8/ATP5F1E/ATP6/RANBP2	40
BP	GO:0051169	nuclear transport	66/1297	351/17653	1.03688e-12	4.75752e-11	3.94006e-11	HSPA9/PDIA3/CALR/NPM1/HSP90AB1/HNRNPA2B1/PHB2/EIF5A/RPSA/HNRNPA1/YWHAE/STAT3/DDX39B/SET/SRSF1/SRSF7/RPL23/SFN/RAN/JUP/U2AF2/KHDRBS1/ALYREF/XPO1/ANP32A/KPNB1/RPS15/ABCE1/EIF6/SRSF6/SNRPD1/SNRPE/DDX39A/SRSF9/PARK7/U2AF1/SSB/SRSF3/CHP1/EMD/SRRM1/KPNA1/KPNA2/RANBP1/HTATIP2/SRSF2/TXN/RANGAP1/SNRPD2/KPNA4/BANF1/SRSF10/RBM4/SEC61B/AGFG1/TMEM33/UPF1/RAB18/SARNP/EIF4E/RANBP2/PPP1R12A/MAGOHB/SNRPB/SNRPD3/P…	66
BP	GO:2000736	regulation of stem cell differentiation	38/1297	141/17653	1.06539e-12	4.84466e-11	4.01222e-11	HSPA9/HNRNPU/STAT3/RPS27A/PSMA7/PSMB6/PSME2/PSMC5/PSMC4/H3F3A/H3F3B/PSMA6/HIST1H4I/HIST1H4A/HIST1H4D/HIST1H4F/HIST1H4K/HIST1H4J/HIST1H4C/HIST1H4H/HIST1H4B/HIST1H4E/HIST1H4L/HIST2H4A/HIST4H4/HIST2H4B/PSMA2/PSMB7/PSMA1/PSMC6/PSMB2/OCIAD1/PSMD4/PSMD8/PSMC3/PSMB4/PSMA4/PSMA5	38
BP	GO:0030968	endoplasmic reticulum unfolded protein response	36/1297	130/17653	1.74099e-12	7.8468e-11	6.49852e-11	HSPA5/HYOU1/HSP90B1/VCP/CALR/HSPA1A/PDIA6/ERO1A/AGR2/TLN1/RACK1/UGGT1/TPP1/ACADVL/DNAJC3/DNAJB11/ATP6V0D1/MYDGF/PDIA5/SEC63/SEC31A/VAPB/HDGF/EIF2S1/SEC61A1/SRPRB/PTPN1/DCTN1/SEC61B/TMEM33/SSR1/TBL2/LMNA/DERL2/SRPRA/DERL1	36
BP	GO:0006913	nucleocytoplasmic transport	65/1297	347/17653	1.84585e-12	8.24643e-11	6.82949e-11	HSPA9/PDIA3/CALR/NPM1/HSP90AB1/HNRNPA2B1/PHB2/EIF5A/RPSA/HNRNPA1/YWHAE/STAT3/DDX39B/SET/SRSF1/SRSF7/RPL23/SFN/RAN/JUP/U2AF2/KHDRBS1/ALYREF/XPO1/ANP32A/KPNB1/RPS15/ABCE1/EIF6/SRSF6/SNRPD1/SNRPE/DDX39A/SRSF9/PARK7/U2AF1/SSB/SRSF3/CHP1/EMD/SRRM1/KPNA1/KPNA2/RANBP1/HTATIP2/SRSF2/TXN/RANGAP1/SNRPD2/KPNA4/SRSF10/RBM4/SEC61B/AGFG1/TMEM33/UPF1/RAB18/SARNP/EIF4E/RANBP2/PPP1R12A/MAGOHB/SNRPB/SNRPD3/PPP1R10	65
BP	GO:0031647	regulation of protein stability	53/1297	253/17653	2.48895e-12	1.10228e-10	9.12882e-11	HSPD1/FLNA/HSPA8/CALR/GAPDH/HSPA1A/HSPA1B/HSP90AB1/PHB/PHB2/CCT7/RTN4/HSP90AA1/PPIB/CCT4/CCT2/CCT3/ASPH/ISOC2/RPL5/TCP1/RPS7/CCT6A/P3H1/CCT8/CTSA/CDC42/RPL23/GSN/PFN1/HIST1H1B/PTGES3/PARK7/LAMP1/CD81/RPL11/CHP1/CCT5/LAMP2/SH3GLB1/CRTAP/PRKRA/ATP1B3/DPM3/ATP1B1/PSMD8/GIPC1/HIP1/TOMM7/DERL1/STX12/NCLN/RNF128	53
BP	GO:0035967	cellular response to topologically incorrect protein	41/1297	166/17653	3.09167e-12	1.3574e-10	1.12417e-10	HSPA5/HYOU1/HSP90B1/HSPA9/VCP/HSPA8/CALR/HSPA1A/HSPA1B/PDIA6/ERO1A/AGR2/TLN1/RACK1/UGGT1/TPP1/ACADVL/DNAJC3/DNAJB11/ATP6V0D1/MYDGF/HSPA4/PDIA5/SEC63/SEC31A/VAPB/HDGF/EIF2S1/SEC61A1/SRPRB/PTPN1/DCTN1/TOR1A/SEC61B/TMEM33/SSR1/TBL2/LMNA/DERL2/SRPRA/DERL1	41
BP	GO:0070585	protein localization to mitochondrion	45/1297	195/17653	3.48276e-12	1.51604e-10	1.25555e-10	HSPD1/UQCRC2/TIMM50/YWHAZ/HSP90AA1/TOMM40/YWHAB/YWHAG/MTCH2/RUVBL1/SLC25A6/YWHAQ/YWHAE/GRPEL1/TOMM70/DNM1L/TIMM13/TOMM22/SFN/HK1/YWHAH/TIMM17A/TIMM44/TOMM20/HSPA4/PITRM1/ATP5IF1/TIMM9/BID/AGK/SH3GLB1/FIS1/UBE2L3/CHCHD4/MFF/PSMB7/PMPCB/TIMM8B/PSMD8/TOMM7/PMPCA/TOMM5/NDUFA13/PDCD5/TIMM10	45
BP	GO:0006635	fatty acid beta-oxidation	26/1297	73/17653	3.82586e-12	1.65128e-10	1.36755e-10	ECH1/HADHA/ETFA/ECHS1/ACAT1/HADHB/HSD17B4/SCP2/ETFB/ECI1/ACADM/ACADVL/ACOX1/NDUFAB1/CPT1A/DECR1/HADH/ACAA2/IVD/ACAA1/ACAT2/GCDH/DECR2/ABCD3/MCAT/CPT2	26
BP	GO:0048024	regulation of mRNA splicing, via spliceosome	27/1297	79/17653	4.56528e-12	1.95386e-10	1.61814e-10	HSPA8/PTBP1/HNRNPK/HNRNPA2B1/HNRNPU/HNRNPA1/C1QBP/HNRNPL/DDX17/SRSF7/U2AF2/KHDRBS1/SRSF6/SRSF9/SRSF3/THRAP3/DAZAP1/SF3A1/DDX5/SRSF2/SF3B4/RBMX/SRSF10/RBM4/PRPF19/SNRNP70/TRA2B	27
BP	GO:0006754	ATP biosynthetic process	37/1297	142/17653	6.37769e-12	2.68843e-10	2.22649e-10	ATP5F1B/PKM/VCP/ENO1/ALDOA/GAPDH/ATP5F1A/STOML2/PGK1/OGDH/ATP5PB/LDHA/ATP5PO/SLC25A13/ALDOC/ATP5PD/STAT3/ATP5PF/TPI1/ATP5F1C/CYC1/ATP5F1D/COX5B/PARP1/HK1/PGAM1/EIF6/ATP5MG/ATP5ME/NIPSNAP2/PFKP/ATP5MF/GPI/ATP8/ATP5F1E/ATP6/RANBP2	37
BP	GO:0036498	IRE1-mediated unfolded protein response	25/1297	69/17653	6.3872e-12	2.68843e-10	2.22649e-10	HSPA5/HYOU1/HSPA1A/PDIA6/AGR2/TLN1/TPP1/ACADVL/DNAJC3/DNAJB11/ATP6V0D1/MYDGF/PDIA5/SEC63/SEC31A/HDGF/SEC61A1/SRPRB/PTPN1/DCTN1/SEC61B/TMEM33/SSR1/LMNA/SRPRA	25
BP	GO:0051262	protein tetramerization	38/1297	151/17653	1.04471e-11	4.36124e-10	3.61187e-10	PKM/ANXA2/ALDOA/HSD17B10/CAT/SHMT2/XRCC6/RPS19/DNM1L/SOD2/DECR1/HM13/GLS/CRYZ/ATP5IF1/S100A10/ST13/HMGCL/HIST1H4I/HIST1H4A/HIST1H4D/HIST1H4F/HIST1H4K/HIST1H4J/HIST1H4C/HIST1H4H/HIST1H4B/HIST1H4E/HIST1H4L/HIST2H4A/HIST4H4/HIST2H4B/FARSA/NAXE/NUDT21/VASP/FARSB/PEX14	38
BP	GO:2001233	regulation of apoptotic signaling pathway	67/1297	383/17653	2.09849e-11	8.68912e-10	7.19611e-10	HYOU1/PDIA3/P4HB/ENO1/HSPA1A/HSPA1B/HNRNPK/CTTN/VDAC2/YWHAZ/YWHAB/HSPB1/ICAM1/TRAP1/YWHAG/RPS3/DDX3X/HMOX1/ITGAV/YWHAQ/YWHAE/LGALS3/SLC25A5/TPT1/CD44/RACK1/BCAP31/ERP29/OPA1/NDUFS3/CTNNA1/RPS7/DNM1L/SOD2/PPP1CA/SFN/PARP1/GSN/CAV1/YWHAH/FAM162A/SFPQ/QARS/RPL26/ACAA2/NONO/ATP5IF1/PARK7/YBX3/BID/SERPINE1/TXNDC12/FIS1/PTPN1/MIF/PRKRA/MFF/GSTP1/TNFRSF10B/PPP2R1B/LMNA/SLC9A3R1/PPIF/USP47/NDUFA13/PDCD5/…	67
BP	GO:0072655	establishment of protein localization to mitochondrion	43/1297	192/17653	3.00036e-11	1.23232e-09	1.02058e-09	HSPD1/UQCRC2/TIMM50/YWHAZ/HSP90AA1/TOMM40/YWHAB/YWHAG/RUVBL1/SLC25A6/YWHAQ/YWHAE/GRPEL1/TOMM70/TIMM13/TOMM22/SFN/HK1/YWHAH/TIMM17A/TIMM44/TOMM20/HSPA4/PITRM1/ATP5IF1/TIMM9/BID/AGK/SH3GLB1/FIS1/UBE2L3/CHCHD4/MFF/PSMB7/PMPCB/TIMM8B/PSMD8/TOMM7/PMPCA/TOMM5/NDUFA13/PDCD5/TIMM10	43
BP	GO:0051290	protein heterotetramerization	20/1297	48/17653	4.16169e-11	1.69564e-09	1.40428e-09	ANXA2/XRCC6/S100A10/HIST1H4I/HIST1H4A/HIST1H4D/HIST1H4F/HIST1H4K/HIST1H4J/HIST1H4C/HIST1H4H/HIST1H4B/HIST1H4E/HIST1H4L/HIST2H4A/HIST4H4/HIST2H4B/FARSA/NUDT21/FARSB	20
BP	GO:0006734	NADH metabolic process	18/1297	39/17653	4.88947e-11	1.97636e-09	1.63677e-09	PKM/VCP/ENO1/ALDOA/GAPDH/MDH2/PGK1/OGDH/ALDOC/TPI1/GPD2/HK1/PGAM1/PFKP/MDH1/NAXE/GPI/NUDT12	18
BP	GO:1901293	nucleoside phosphate biosynthetic process	65/1297	373/17653	4.98556e-11	1.99933e-09	1.65579e-09	ATP5F1B/PKM/VCP/ENO1/ALDOA/GAPDH/ATP5F1A/STOML2/IDH2/ACAT1/PGK1/OGDH/ATP5PB/LDHA/AK2/ATP5PO/MTHFD1/SLC25A13/ALDOC/APOE/ATP5PD/STAT3/GNAI2/ATP5PF/TPI1/PAICS/ATP5F1C/CYC1/ATP5F1D/COX5B/PARP1/PRPS1/HK1/GARS/GNAI3/CAP1/PGAM1/NME2/EIF6/NME1/ATP5MG/SUCLG1/GMPS/ATP5ME/NME3/CTPS1/NIPSNAP2/PFKP/ATP5MF/NAXE/GART/GPI/ATP8/ERH/UPP1/ATP5F1E/KARS/ACOT7/ATP6/LHPP/RANBP2/APRT/AK4/HDDC2/NUDT12	65
BP	GO:0050821	protein stabilization	38/1297	159/17653	5.52397e-11	2.19794e-09	1.82028e-09	HSPD1/FLNA/CALR/GAPDH/HSPA1A/HSPA1B/HSP90AB1/PHB/PHB2/CCT7/RTN4/HSP90AA1/PPIB/CCT4/CCT2/CCT3/RPL5/TCP1/RPS7/CCT6A/P3H1/CCT8/RPL23/PFN1/HIST1H1B/PTGES3/PARK7/LAMP1/RPL11/CHP1/CCT5/LAMP2/CRTAP/PRKRA/ATP1B3/ATP1B1/HIP1/STX12	38
BP	GO:0019058	viral life cycle	58/1297	316/17653	6.79882e-11	2.68422e-09	2.223e-09	VCP/P4HB/HSPA8/HSPA1A/HSPA1B/HSP90AB1/PABPC1/PPIA/ITGB1/TFRC/RPSA/RAB7A/PPIB/ICAM1/DDX3X/LGALS1/ITGAV/APOE/PCBP2/RAB1B/PCBP1/RAB1A/RPS27A/VAPA/CDC42/TRIM28/RAN/ANPEP/GSN/CAV1/DDX6/XPO1/KPNB1/TRIM25/SNX3/LAMP1/CTSB/HACD3/CD81/LARP1/VAPB/KPNA1/KPNA2/DDX5/CTBP1/LDLR/KPNA4/BANF1/VAMP8/ITGB5/LAMTOR5/F11R/NECTIN2/ITGA5/RANBP2/ADAR/ILF3/STAU1	58
BP	GO:0050657	nucleic acid transport	43/1297	197/17653	7.26835e-11	2.82578e-09	2.34024e-09	LRPPRC/NPM1/MVP/HNRNPA2B1/EIF5A/RPSA/HNRNPA1/IGF2BP3/IGF2BP2/IGF2BP1/DDX39B/SRSF1/SRSF7/RAN/U2AF2/KHDRBS1/ALYREF/XPO1/RPS15/ABCE1/EIF6/SRSF6/TOMM20/DDX39A/SRSF9/RTRAF/U2AF1/SSB/SRSF3/KHSRP/PNPT1/SRRM1/RANBP1/SRSF2/G3BP2/SRSF10/AGFG1/UPF1/SARNP/ATXN2/EIF4E/RANBP2/MAGOHB	43
BP	GO:0050658	RNA transport	43/1297	197/17653	7.26835e-11	2.82578e-09	2.34024e-09	LRPPRC/NPM1/MVP/HNRNPA2B1/EIF5A/RPSA/HNRNPA1/IGF2BP3/IGF2BP2/IGF2BP1/DDX39B/SRSF1/SRSF7/RAN/U2AF2/KHDRBS1/ALYREF/XPO1/RPS15/ABCE1/EIF6/SRSF6/TOMM20/DDX39A/SRSF9/RTRAF/U2AF1/SSB/SRSF3/KHSRP/PNPT1/SRRM1/RANBP1/SRSF2/G3BP2/SRSF10/AGFG1/UPF1/SARNP/ATXN2/EIF4E/RANBP2/MAGOHB	43
BP	GO:0006888	ER to Golgi vesicle-mediated transport	44/1297	205/17653	7.85126e-11	3.02928e-09	2.50877e-09	HYOU1/VCP/BCAP31/RAB1B/COPG1/TMED10/RAB1A/ACTR1A/TMED4/TMED9/VAPA/NSF/COPE/COPB2/NAPA/LMAN1/ARCN1/COPA/ERGIC1/LMAN2/SEC22B/CD59/TICAM2/SAR1A/CAPZB/CAPZA1/MCFD2/COPB1/COPZ1/TMED2/CAPZA2/SEC31A/VAPB/IER3IP1/TMED5/SPTAN1/DCTN1/DYNC1LI1/DYNC1H1/SEC24C/DCTN2/SCFD1/SEC24B/VAMP7	44
BP	GO:0006890	retrograde vesicle-mediated transport, Golgi to ER	26/1297	83/17653	1.05187e-10	4.02796e-09	3.33585e-09	RAB1B/COPG1/TMED10/RAB1A/TMED9/NSF/GOLPH3/COPE/COPB2/NAPA/ARF3/ARCN1/COPA/LMAN2/SEC22B/SURF4/RAB6A/COPB1/COPZ1/TMED2/ARF5/TAPBP/RER1/SCFD1/KIF2C/KIF26A	26
BP	GO:0051236	establishment of RNA localization	43/1297	200/17653	1.21506e-10	4.61812e-09	3.82461e-09	LRPPRC/NPM1/MVP/HNRNPA2B1/EIF5A/RPSA/HNRNPA1/IGF2BP3/IGF2BP2/IGF2BP1/DDX39B/SRSF1/SRSF7/RAN/U2AF2/KHDRBS1/ALYREF/XPO1/RPS15/ABCE1/EIF6/SRSF6/TOMM20/DDX39A/SRSF9/RTRAF/U2AF1/SSB/SRSF3/KHSRP/PNPT1/SRRM1/RANBP1/SRSF2/G3BP2/SRSF10/AGFG1/UPF1/SARNP/ATXN2/EIF4E/RANBP2/MAGOHB	43
BP	GO:0032200	telomere organization	39/1297	172/17653	1.6779e-10	6.33004e-09	5.24238e-09	HSP90AB1/HNRNPA2B1/XRCC6/CCT7/HNRNPU/HSP90AA1/HNRNPA1/XRCC5/CCT4/CCT2/CCT3/TCP1/CCT6A/CCT8/PARP1/HNRNPC/PTGES3/H3F3A/H3F3B/CCT5/HIST1H4I/HIST1H4A/HIST1H4D/HIST1H4F/HIST1H4K/HIST1H4J/HIST1H4C/HIST1H4H/HIST1H4B/HIST1H4E/HIST1H4L/HIST2H4A/HIST4H4/HIST2H4B/HNRNPD/RPA2/UPF1/PCNA/PPP1R10	39
BP	GO:0006123	mitochondrial electron transport, cytochrome c to oxygen	13/1297	21/17653	1.99978e-10	7.43421e-09	6.15683e-09	COX5A/COX6B1/COX5B/COX4I1/COX2/CYCS/COX6A1/COX7A2L/COX7C/COX7B/NDUFA4/COX6C/COX3	13
BP	GO:0019646	aerobic electron transport chain	13/1297	21/17653	1.99978e-10	7.43421e-09	6.15683e-09	COX5A/COX6B1/COX5B/COX4I1/COX2/CYCS/COX6A1/COX7A2L/COX7C/COX7B/NDUFA4/COX6C/COX3	13
BP	GO:0000723	telomere maintenance	37/1297	159/17653	2.24148e-10	8.21286e-09	6.80168e-09	HSP90AB1/HNRNPA2B1/XRCC6/CCT7/HNRNPU/HSP90AA1/HNRNPA1/XRCC5/CCT4/CCT2/CCT3/TCP1/CCT6A/CCT8/PARP1/HNRNPC/PTGES3/CCT5/HIST1H4I/HIST1H4A/HIST1H4D/HIST1H4F/HIST1H4K/HIST1H4J/HIST1H4C/HIST1H4H/HIST1H4B/HIST1H4E/HIST1H4L/HIST2H4A/HIST4H4/HIST2H4B/HNRNPD/RPA2/UPF1/PCNA/PPP1R10	37
BP	GO:2001242	regulation of intrinsic apoptotic signaling pathway	37/1297	159/17653	2.24148e-10	8.21286e-09	6.80168e-09	HYOU1/P4HB/ENO1/HSPA1A/HNRNPK/VDAC2/HSPB1/TRAP1/RPS3/DDX3X/TPT1/CD44/RACK1/BCAP31/ERP29/OPA1/NDUFS3/RPS7/DNM1L/SOD2/PARP1/CAV1/SFPQ/RPL26/NONO/PARK7/YBX3/BID/TXNDC12/FIS1/PTPN1/MIF/PRKRA/SLC9A3R1/PPIF/USP47/NDUFA13	37
BP	GO:0009165	nucleotide biosynthetic process	63/1297	369/17653	2.37686e-10	8.64666e-09	7.16095e-09	ATP5F1B/PKM/VCP/ENO1/ALDOA/GAPDH/ATP5F1A/STOML2/IDH2/ACAT1/PGK1/OGDH/ATP5PB/LDHA/AK2/ATP5PO/MTHFD1/SLC25A13/ALDOC/APOE/ATP5PD/STAT3/GNAI2/ATP5PF/TPI1/PAICS/ATP5F1C/CYC1/ATP5F1D/COX5B/PARP1/PRPS1/HK1/GARS/GNAI3/CAP1/PGAM1/NME2/EIF6/NME1/ATP5MG/GMPS/ATP5ME/NME3/CTPS1/NIPSNAP2/PFKP/ATP5MF/NAXE/GART/GPI/ATP8/ERH/UPP1/ATP5F1E/KARS/ACOT7/ATP6/RANBP2/APRT/AK4/HDDC2/NUDT12	63
BP	GO:0015931	nucleobase-containing compound transport	47/1297	240/17653	4.79044e-10	1.73033e-08	1.43302e-08	LRPPRC/NPM1/MVP/HNRNPA2B1/EIF5A/RPSA/HNRNPA1/SLC25A6/SLC25A5/IGF2BP3/IGF2BP2/IGF2BP1/DDX39B/SRSF1/SRSF7/RAN/U2AF2/KHDRBS1/ALYREF/XPO1/RPS15/ABCE1/EIF6/SRSF6/TOMM20/SLC25A24/DDX39A/SRSF9/RTRAF/U2AF1/SSB/SRSF3/KHSRP/PNPT1/SRRM1/RANBP1/SRSF2/G3BP2/SLC25A32/SRSF10/AGFG1/UPF1/SARNP/ATXN2/EIF4E/RANBP2/MAGOHB	47
BP	GO:0002244	hematopoietic progenitor cell differentiation	40/1297	186/17653	5.32901e-10	1.91131e-08	1.5829e-08	HSPA9/EEF2/XRCC5/RPS27A/PSMA7/PSMB6/PSME2/PSMC5/PSMC4/H3F3A/H3F3B/PSMA6/HIST1H4I/HIST1H4A/HIST1H4D/HIST1H4F/HIST1H4K/HIST1H4J/HIST1H4C/HIST1H4H/HIST1H4B/HIST1H4E/HIST1H4L/HIST2H4A/HIST4H4/HIST2H4B/PSMA2/PSMB7/PSMA1/PSMC6/PRRC2C/PSMB2/PSMD4/PSMD8/PSMC3/PSMB4/PSMA4/STON2/ADAR/PSMA5	40
BP	GO:0070671	response to interleukin-12	19/1297	49/17653	5.63548e-10	2.0071e-08	1.66223e-08	HSPA9/P4HB/ANXA2/RPLP0/HNRNPA2B1/MSN/PPIA/RAP1B/CFL1/HNRNPF/TCP1/SOD2/CDC42/PSME2/TICAM2/CAPZA1/MIF/RALA/CNN2	19
BP	GO:0042273	ribosomal large subunit biogenesis	23/1297	71/17653	5.91833e-10	2.07876e-08	1.72158e-08	NPM1/RPL3/RPL7A/RPL7/RPL6/RPL10/RPL23A/RPL5/RPL12/RPL14/MRPL1/RPL24/EIF6/RPL26/RPL35/RPL10A/RPL11/MRPL11/RPL26L1/RPL38/RPL35A/MRPL20/RSL1D1	23
BP	GO:0045454	cell redox homeostasis	23/1297	71/17653	5.91833e-10	2.07876e-08	1.72158e-08	PDIA4/PDIA3/P4HB/PDIA6/PRDX1/DLD/PRDX4/TXNDC5/PRDX5/ERO1A/PRDX3/ERP44/TMX1/PDIA5/PTGES2/TXNDC12/TMX3/TXN/SH3BGRL3/GLRX5/TXNRD1/TMX2/PRDX2	23
BP	GO:0046390	ribose phosphate biosynthetic process	55/1297	308/17653	6.12354e-10	2.13611e-08	1.76907e-08	ATP5F1B/PKM/VCP/ENO1/ALDOA/G6PD/GAPDH/ATP5F1A/STOML2/ACAT1/PGK1/OGDH/ATP5PB/LDHA/AK2/ATP5PO/SLC25A13/ALDOC/APOE/ATP5PD/STAT3/GNAI2/ATP5PF/TPI1/PAICS/ATP5F1C/CYC1/ATP5F1D/COX5B/PARP1/PRPS1/HK1/GNAI3/CAP1/PGAM1/NME2/EIF6/NME1/ATP5MG/GMPS/ATP5ME/NME3/CTPS1/NIPSNAP2/PFKP/ATP5MF/GART/GPI/ATP8/UPP1/ATP5F1E/ACOT7/ATP6/RANBP2/APRT	55
BP	GO:0051084	'de novo' posttranslational protein folding	16/1297	35/17653	7.01383e-10	2.43003e-08	2.01249e-08	HSPA5/HYOU1/HSPA9/HSPA8/HSPA1A/HSPA1B/ERO1A/CCT2/UGGT1/HSPE1/PTGES3/HSPA4/ST13/TOR1A/CHCHD4/DNAJB1	16
BP	GO:0000028	ribosomal small subunit assembly	12/1297	19/17653	7.30953e-10	2.51537e-08	2.08316e-08	RPSA/RPS17/RPS19/RPS5/RPS14/RPS10/RPS15/RPS27/RPL38/RPS28/MRPS11/MRPS7	12
BP	GO:0006626	protein targeting to mitochondrion	35/1297	152/17653	9.28149e-10	3.17253e-08	2.62741e-08	HSPD1/UQCRC2/TIMM50/HSP90AA1/TOMM40/RUVBL1/SLC25A6/GRPEL1/TOMM70/TIMM13/TOMM22/TIMM17A/TIMM44/TOMM20/HSPA4/PITRM1/ATP5IF1/TIMM9/BID/AGK/SH3GLB1/FIS1/UBE2L3/CHCHD4/MFF/PSMB7/PMPCB/TIMM8B/PSMD8/TOMM7/PMPCA/TOMM5/NDUFA13/PDCD5/TIMM10	35
BP	GO:0006164	purine nucleotide biosynthetic process	53/1297	295/17653	1.00344e-09	3.40703e-08	2.82161e-08	ATP5F1B/PKM/VCP/ENO1/ALDOA/GAPDH/ATP5F1A/STOML2/ACAT1/PGK1/OGDH/ATP5PB/LDHA/AK2/ATP5PO/MTHFD1/SLC25A13/ALDOC/APOE/ATP5PD/STAT3/GNAI2/ATP5PF/TPI1/PAICS/ATP5F1C/CYC1/ATP5F1D/COX5B/PARP1/PRPS1/HK1/GNAI3/CAP1/PGAM1/NME2/EIF6/NME1/ATP5MG/GMPS/ATP5ME/NME3/NIPSNAP2/PFKP/ATP5MF/GART/GPI/ATP8/ATP5F1E/ACOT7/ATP6/RANBP2/APRT	53
BP	GO:0090151	establishment of protein localization to mitochondrial membrane	10/1297	13/17653	1.03332e-09	3.48522e-08	2.88637e-08	HSP90AA1/TIMM13/TOMM22/HSPA4/TIMM9/AGK/TOMM7/NDUFA13/PDCD5/TIMM10	10
BP	GO:0006335	DNA replication-dependent nucleosome assembly	15/1297	32/17653	1.555e-09	5.17621e-08	4.28681e-08	HIST1H4I/HIST1H4A/HIST1H4D/HIST1H4F/HIST1H4K/HIST1H4J/HIST1H4C/HIST1H4H/HIST1H4B/HIST1H4E/HIST1H4L/HIST2H4A/HIST4H4/HIST2H4B/RBBP4	15
BP	GO:0034723	DNA replication-dependent nucleosome organization	15/1297	32/17653	1.555e-09	5.17621e-08	4.28681e-08	HIST1H4I/HIST1H4A/HIST1H4D/HIST1H4F/HIST1H4K/HIST1H4J/HIST1H4C/HIST1H4H/HIST1H4B/HIST1H4E/HIST1H4L/HIST2H4A/HIST4H4/HIST2H4B/RBBP4	15
BP	GO:0019395	fatty acid oxidation	27/1297	100/17653	1.90483e-09	6.29953e-08	5.21711e-08	ECH1/HADHA/ETFA/ECHS1/ACAT1/HADHB/POR/HSD17B4/SCP2/ETFB/ECI1/ACADM/ACADVL/ACOX1/NDUFAB1/CPT1A/DECR1/HADH/ACAA2/IVD/ACAA1/ACAT2/GCDH/DECR2/ABCD3/MCAT/CPT2	27
BP	GO:0033119	negative regulation of RNA splicing	13/1297	24/17653	1.98981e-09	6.51923e-08	5.39906e-08	PTBP1/HNRNPK/HNRNPA2B1/C1QBP/SRSF7/U2AF2/RPS13/SRSF6/SRSF9/RPS26/RBMX/SRSF10/TRA2B	13
BP	GO:1903312	negative regulation of mRNA metabolic process	23/1297	75/17653	1.99686e-09	6.51923e-08	5.39906e-08	PTBP1/HNRNPK/HNRNPA2B1/PABPC1/YBX1/HNRNPU/C1QBP/SYNCRIP/IGF2BP1/SRSF7/TARDBP/HNRNPC/HNRNPA0/U2AF2/SRSF6/SRSF9/YBX3/LARP1/THRAP3/HNRNPD/RBMX/SRSF10/TRA2B	23
BP	GO:0035722	interleukin-12-mediated signaling pathway	18/1297	47/17653	2.03187e-09	6.54956e-08	5.42418e-08	HSPA9/P4HB/ANXA2/RPLP0/HNRNPA2B1/MSN/PPIA/RAP1B/CFL1/HNRNPF/TCP1/SOD2/CDC42/PSME2/CAPZA1/MIF/RALA/CNN2	18
BP	GO:0071349	cellular response to interleukin-12	18/1297	47/17653	2.03187e-09	6.54956e-08	5.42418e-08	HSPA9/P4HB/ANXA2/RPLP0/HNRNPA2B1/MSN/PPIA/RAP1B/CFL1/HNRNPF/TCP1/SOD2/CDC42/PSME2/CAPZA1/MIF/RALA/CNN2	18
BP	GO:0006732	coenzyme metabolic process	62/1297	380/17653	2.1153e-09	6.77562e-08	5.6114e-08	PKM/VCP/ENO1/ALDOA/G6PD/GAPDH/TKT/IDH2/MDH2/DLD/ACAT1/PGK1/SHMT2/OGDH/LDHA/HSD17B4/MTHFD1/FASN/ALDOC/DLST/DLAT/STAT3/ME2/TPI1/PDHB/SUCLG2/MTHFD2/MCCC2/GPD2/HK1/NNT/CYB5R3/SCD/PGAM1/EIF6/NDUFA9/PGD/SUCLG1/ATP5IF1/LDHB/PDHA1/PFKP/HMGCL/ACSL3/HSD17B12/FDXR/GCDH/SLC25A1/MDH1/DBI/SLC25A32/NAXE/GART/GPI/MPC1/CYB5A/SUCLA2/TECR/ACOT9/ACOT7/RANBP2/NUDT12	62
BP	GO:0051168	nuclear export	41/1297	203/17653	2.36779e-09	7.53696e-08	6.24192e-08	HSPA9/CALR/NPM1/HNRNPA2B1/EIF5A/RPSA/HNRNPA1/YWHAE/DDX39B/SRSF1/SRSF7/SFN/RAN/U2AF2/KHDRBS1/ALYREF/XPO1/RPS15/ABCE1/EIF6/SRSF6/DDX39A/SRSF9/PARK7/U2AF1/SSB/SRSF3/CHP1/EMD/SRRM1/RANBP1/SRSF2/TXN/RANGAP1/SRSF10/AGFG1/UPF1/SARNP/EIF4E/RANBP2/MAGOHB	41
BP	GO:0043648	dicarboxylic acid metabolic process	28/1297	108/17653	2.618e-09	8.28166e-08	6.85866e-08	OAT/IDH2/MDH2/DLD/SDHA/FH/SHMT2/GLUD1/OGDH/MTHFD1/GOT2/DLST/ME2/SUCLG2/ALDH18A1/MTHFD2/ALDH4A1/GLS/SUCLG1/SDHB/GRHPR/ME3/MDH1/SLC25A32/CPOX/MRPS36/SUCLA2/L2HGDH	28
BP	GO:0006336	DNA replication-independent nucleosome assembly	19/1297	53/17653	2.67879e-09	8.42166e-08	6.97461e-08	NPM1/RUVBL1/H3F3A/H3F3B/HIST1H4I/HIST1H4A/HIST1H4D/HIST1H4F/HIST1H4K/HIST1H4J/HIST1H4C/HIST1H4H/HIST1H4B/HIST1H4E/HIST1H4L/HIST2H4A/HIST4H4/HIST2H4B/RBBP4	19
BP	GO:0006611	protein export from nucleus	38/1297	181/17653	2.93104e-09	9.15814e-08	7.58455e-08	HSPA9/CALR/NPM1/HNRNPA2B1/EIF5A/RPSA/YWHAE/DDX39B/SRSF1/SRSF7/SFN/RAN/U2AF2/ALYREF/XPO1/RPS15/ABCE1/EIF6/SRSF6/DDX39A/SRSF9/PARK7/U2AF1/SSB/SRSF3/CHP1/EMD/SRRM1/SRSF2/TXN/RANGAP1/SRSF10/AGFG1/UPF1/SARNP/EIF4E/RANBP2/MAGOHB	38
BP	GO:0009260	ribonucleotide biosynthetic process	53/1297	304/17653	3.01381e-09	9.35935e-08	7.75118e-08	ATP5F1B/PKM/VCP/ENO1/ALDOA/GAPDH/ATP5F1A/STOML2/ACAT1/PGK1/OGDH/ATP5PB/LDHA/AK2/ATP5PO/SLC25A13/ALDOC/APOE/ATP5PD/STAT3/GNAI2/ATP5PF/TPI1/PAICS/ATP5F1C/CYC1/ATP5F1D/COX5B/PARP1/HK1/GNAI3/CAP1/PGAM1/NME2/EIF6/NME1/ATP5MG/GMPS/ATP5ME/NME3/CTPS1/NIPSNAP2/PFKP/ATP5MF/GART/GPI/ATP8/UPP1/ATP5F1E/ACOT7/ATP6/RANBP2/APRT	53
BP	GO:0034440	lipid oxidation	27/1297	102/17653	3.06358e-09	9.45625e-08	7.83143e-08	ECH1/HADHA/ETFA/ECHS1/ACAT1/HADHB/POR/HSD17B4/SCP2/ETFB/ECI1/ACADM/ACADVL/ACOX1/NDUFAB1/CPT1A/DECR1/HADH/ACAA2/IVD/ACAA1/ACAT2/GCDH/DECR2/ABCD3/MCAT/CPT2	27
BP	GO:0034080	CENP-A containing nucleosome assembly	17/1297	43/17653	3.20834e-09	9.78448e-08	8.10326e-08	NPM1/RUVBL1/HIST1H4I/HIST1H4A/HIST1H4D/HIST1H4F/HIST1H4K/HIST1H4J/HIST1H4C/HIST1H4H/HIST1H4B/HIST1H4E/HIST1H4L/HIST2H4A/HIST4H4/HIST2H4B/RBBP4	17
BP	GO:0061641	CENP-A containing chromatin organization	17/1297	43/17653	3.20834e-09	9.78448e-08	8.10326e-08	NPM1/RUVBL1/HIST1H4I/HIST1H4A/HIST1H4D/HIST1H4F/HIST1H4K/HIST1H4J/HIST1H4C/HIST1H4H/HIST1H4B/HIST1H4E/HIST1H4L/HIST2H4A/HIST4H4/HIST2H4B/RBBP4	17
BP	GO:0034724	DNA replication-independent nucleosome organization	19/1297	54/17653	3.84993e-09	1.16712e-07	9.66583e-08	NPM1/RUVBL1/H3F3A/H3F3B/HIST1H4I/HIST1H4A/HIST1H4D/HIST1H4F/HIST1H4K/HIST1H4J/HIST1H4C/HIST1H4H/HIST1H4B/HIST1H4E/HIST1H4L/HIST2H4A/HIST4H4/HIST2H4B/RBBP4	19
BP	GO:0050684	regulation of mRNA processing	29/1297	117/17653	4.21396e-09	1.26992e-07	1.05172e-07	HSPA8/HSPA1A/PTBP1/HNRNPK/HNRNPA2B1/HNRNPU/HNRNPA1/C1QBP/HNRNPL/DDX17/SRSF7/U2AF2/KHDRBS1/SRSF6/SRSF9/SRSF3/THRAP3/DAZAP1/SF3A1/DDX5/SRSF2/SF3B4/RBMX/SRSF10/NUDT21/RBM4/PRPF19/SNRNP70/TRA2B	29
BP	GO:0072522	purine-containing compound biosynthetic process	53/1297	307/17653	4.29372e-09	1.28635e-07	1.06532e-07	ATP5F1B/PKM/VCP/ENO1/ALDOA/GAPDH/ATP5F1A/STOML2/ACAT1/PGK1/OGDH/ATP5PB/LDHA/AK2/ATP5PO/MTHFD1/SLC25A13/ALDOC/APOE/ATP5PD/STAT3/GNAI2/ATP5PF/TPI1/PAICS/ATP5F1C/CYC1/ATP5F1D/COX5B/PARP1/PRPS1/HK1/GNAI3/CAP1/PGAM1/NME2/EIF6/NME1/ATP5MG/GMPS/ATP5ME/NME3/NIPSNAP2/PFKP/ATP5MF/GART/GPI/ATP8/ATP5F1E/ACOT7/ATP6/RANBP2/APRT	53
BP	GO:0000183	chromatin silencing at rDNA	16/1297	39/17653	4.91451e-09	1.46372e-07	1.21222e-07	H3F3A/H3F3B/HIST1H4I/HIST1H4A/HIST1H4D/HIST1H4F/HIST1H4K/HIST1H4J/HIST1H4C/HIST1H4H/HIST1H4B/HIST1H4E/HIST1H4L/HIST2H4A/HIST4H4/HIST2H4B	16
BP	GO:0009152	purine ribonucleotide biosynthetic process	51/1297	291/17653	4.97958e-09	1.47448e-07	1.22113e-07	ATP5F1B/PKM/VCP/ENO1/ALDOA/GAPDH/ATP5F1A/STOML2/ACAT1/PGK1/OGDH/ATP5PB/LDHA/AK2/ATP5PO/SLC25A13/ALDOC/APOE/ATP5PD/STAT3/GNAI2/ATP5PF/TPI1/PAICS/ATP5F1C/CYC1/ATP5F1D/COX5B/PARP1/HK1/GNAI3/CAP1/PGAM1/NME2/EIF6/NME1/ATP5MG/GMPS/ATP5ME/NME3/NIPSNAP2/PFKP/ATP5MF/GART/GPI/ATP8/ATP5F1E/ACOT7/ATP6/RANBP2/APRT	51
BP	GO:0090175	regulation of establishment of planar polarity	28/1297	112/17653	6.32548e-09	1.86218e-07	1.54221e-07	CLTC/RHOA/AP2B1/RPS27A/PSMA7/CDC42/AP2A2/PFN1/PSMB6/PSME2/PSMC5/PSMC4/PSMA6/PSMA2/RAC1/PSMB7/PSMA1/PSMC6/PSMB2/AP2A1/PSMD4/PSMD8/SEC24B/PSMC3/PSMB4/PSMA4/PSMA5/PTK7	28
BP	GO:0031055	chromatin remodeling at centromere	17/1297	45/17653	7.29591e-09	2.13552e-07	1.76859e-07	NPM1/RUVBL1/HIST1H4I/HIST1H4A/HIST1H4D/HIST1H4F/HIST1H4K/HIST1H4J/HIST1H4C/HIST1H4H/HIST1H4B/HIST1H4E/HIST1H4L/HIST2H4A/HIST4H4/HIST2H4B/RBBP4	17
BP	GO:0044743	protein transmembrane import into intracellular organelle	16/1297	40/17653	7.63382e-09	2.22166e-07	1.83992e-07	HSPD1/TIMM50/TOMM40/GRPEL1/TIMM13/TOMM22/TIMM17A/TIMM44/TOMM20/TIMM9/AGK/CHCHD4/PEX14/TOMM7/NDUFA13/TIMM10	16
BP	GO:0006122	mitochondrial electron transport, ubiquinol to cytochrome c	10/1297	15/17653	9.46111e-09	2.72234e-07	2.25457e-07	UQCRC2/UQCRC1/UQCRFS1/CYC1/UQCRB/UQCRH/CYCS/UQCRQ/UQCR10/PMPCB	10
BP	GO:1904874	positive regulation of telomerase RNA localization to Cajal body	10/1297	15/17653	9.46111e-09	2.72234e-07	2.25457e-07	CCT7/CCT4/RUVBL1/CCT2/CCT3/TCP1/CCT6A/CCT8/RUVBL2/CCT5	10
BP	GO:0071453	cellular response to oxygen levels	42/1297	222/17653	1.15741e-08	3.31163e-07	2.74261e-07	HYOU1/P4HB/ENO1/AIFM1/PHB2/PGK1/GNB1/ERO1A/ICAM1/HMOX1/OPA1/DNM1L/RPS27A/PSMA7/CAV1/ATP6V0D1/CHCHD2/PSMB6/FAM162A/PSME2/PSMC5/ACAA2/PSMC4/PSMA6/HIGD1A/PSMA2/CCDC115/PSMB7/TBL2/PSMA1/PSMC6/LMNA/PSMB2/HP1BP3/ATP6V1A/PSMD4/PSMD8/PSMC3/ELOB/PSMB4/PSMA4/PSMA5	42
BP	GO:1902653	secondary alcohol biosynthetic process	21/1297	69/17653	1.16439e-08	3.31298e-07	2.74373e-07	G6PD/CES1/ACAT1/POR/NSDHL/FASN/APOE/DHCR7/RAN/CYB5R3/SCD/KPNB1/ERLIN1/ACAA2/EBP/ACAT2/CNBP/MSMO1/CYP51A1/LBR/FDFT1	21
BP	GO:0017038	protein import	39/1297	198/17653	1.20643e-08	3.41354e-07	2.82701e-07	HSPD1/PDIA3/HSPA8/HSP90AB1/PHB2/TIMM50/HSP90AA1/TOMM40/APOE/STAT3/GRPEL1/TIMM13/RPL23/TOMM22/RAN/JUP/TIMM17A/KPNB1/TIMM44/TOMM20/HSPA4/CHP1/TIMM9/AGK/LAMP2/KPNA1/KPNA2/RANBP1/TXN/KPNA4/CHCHD4/SEC61B/PEX14/RANBP2/TOMM7/NDUFA13/PDCD5/TIMM10/PPP1R10	39
BP	GO:0042026	protein refolding	13/1297	27/17653	1.2973e-08	3.64619e-07	3.01968e-07	HSPD1/HSPA5/HYOU1/HSPA9/HSPA8/HSPA1A/HSPA1B/HSP90AA1/B2M/DNAJA2/HSPA4/ST13/SNRNP70	13
BP	GO:0001738	morphogenesis of a polarized epithelium	31/1297	137/17653	1.30298e-08	3.64619e-07	3.01968e-07	CLTC/MSN/RHOA/AP2B1/RAB10/RPS27A/PSMA7/CDC42/AP2A2/PFN1/PSMB6/PSME2/PSMC5/PSMC4/PSMA6/PSMA2/RAC1/PSMB7/PSMA1/PSMC6/PSMB2/AP2A1/PSMD4/PSMD8/SLC9A3R1/SEC24B/PSMC3/PSMB4/PSMA4/PSMA5/PTK7	31
BP	GO:0048025	negative regulation of mRNA splicing, via spliceosome	11/1297	19/17653	1.40853e-08	3.92001e-07	3.24646e-07	PTBP1/HNRNPK/HNRNPA2B1/C1QBP/SRSF7/U2AF2/SRSF6/SRSF9/RBMX/SRSF10/TRA2B	11
BP	GO:0009062	fatty acid catabolic process	27/1297	110/17653	1.79401e-08	4.93887e-07	4.09025e-07	ECH1/HADHA/ETFA/ECHS1/ACAT1/HADHB/HSD17B4/SCP2/ETFB/ECI1/ACADM/ACADVL/ACOX1/NDUFAB1/CPT1A/DECR1/HADH/ACAA2/ACAD9/IVD/ACAA1/ACAT2/GCDH/DECR2/ABCD3/MCAT/CPT2	27
BP	GO:0060071	Wnt signaling pathway, planar cell polarity pathway	27/1297	110/17653	1.79401e-08	4.93887e-07	4.09025e-07	CLTC/RHOA/AP2B1/RPS27A/PSMA7/CDC42/AP2A2/PFN1/PSMB6/PSME2/PSMC5/PSMC4/PSMA6/PSMA2/RAC1/PSMB7/PSMA1/PSMC6/PSMB2/AP2A1/PSMD4/PSMD8/PSMC3/PSMB4/PSMA4/PSMA5/PTK7	27
BP	GO:0006405	RNA export from nucleus	32/1297	147/17653	2.05976e-08	5.63999e-07	4.6709e-07	NPM1/HNRNPA2B1/EIF5A/RPSA/HNRNPA1/DDX39B/SRSF1/SRSF7/RAN/U2AF2/KHDRBS1/ALYREF/XPO1/RPS15/ABCE1/EIF6/SRSF6/DDX39A/SRSF9/U2AF1/SSB/SRSF3/SRRM1/RANBP1/SRSF2/SRSF10/AGFG1/UPF1/SARNP/EIF4E/RANBP2/MAGOHB	32
BP	GO:1905475	regulation of protein localization to membrane	34/1297	163/17653	2.33842e-08	6.36876e-07	5.27445e-07	CLTC/ITGB1/EZR/YWHAZ/YWHAB/AP2B1/YWHAG/YWHAQ/AGR2/YWHAE/RACK1/RHOG/SFN/GSN/YWHAH/MESD/GDI1/SQSTM1/CHP1/ITGA3/BID/STX7/CSNK2A1/ACSL3/FIS1/VAMP8/CNPY4/MFF/CDH2/RER1/DLG1/PICALM/VAMP7/PDCD5	34
BP	GO:0051701	interaction with host	40/1297	211/17653	2.42289e-08	6.5637e-07	5.4359e-07	P4HB/GAPDH/HSPA1A/HSPA1B/PPIA/ITGB1/TFRC/RPSA/RAB7A/ICAM1/SLC25A6/LGALS1/ITGAV/TCP1/DDX39B/CTNND1/RPS27A/VAPA/TRIM28/ANPEP/GSN/ALB/CAV1/ALYREF/KPNB1/TRIM25/SNX3/LAMP1/CTSB/CD81/VAPB/KPNA1/KPNA2/LDLR/KPNA4/VAMP8/ITGB5/F11R/NECTIN2/ITGA5	40
BP	GO:0019886	antigen processing and presentation of exogenous peptide antigen via MHC class II	25/1297	98/17653	2.62517e-08	7.07408e-07	5.85857e-07	CLTC/CANX/CTSD/RAB7A/AP2B1/ACTR1A/AP2A2/AP1B1/CLTA/CAPZB/CAPZA1/CAPZA2/SEC31A/AP1G1/DCTN1/DYNC1LI1/LGMN/DYNC1H1/SEC24C/DCTN2/IFI30/AP2A1/KIF2C/SEC24B/KIF26A	25
BP	GO:0042274	ribosomal small subunit biogenesis	21/1297	72/17653	2.69392e-08	7.22111e-07	5.98035e-07	NPM1/RPSA/RPS8/RPS17/RPS19/RPS7/RPS5/RPS14/RPS10/RPS16/RPS6/RPS15/RPS27/RPL38/RPS24/RPS28/MRPS9/RPS21/MRPS11/MRPS7/EMG1	21
BP	GO:0006695	cholesterol biosynthetic process	20/1297	67/17653	3.73385e-08	9.95628e-07	8.24554e-07	G6PD/CES1/POR/NSDHL/FASN/APOE/DHCR7/RAN/CYB5R3/SCD/KPNB1/ERLIN1/ACAA2/EBP/ACAT2/CNBP/MSMO1/CYP51A1/LBR/FDFT1	20
BP	GO:0006521	regulation of cellular amino acid metabolic process	19/1297	61/17653	3.79028e-08	1.00541e-06	8.32657e-07	PSMA7/COMT/PSMB6/PSME2/PSMC5/PSMC4/PARK7/PSMA6/PSMA2/PSMB7/PSMA1/PSMC6/PSMB2/PSMD4/PSMD8/PSMC3/PSMB4/PSMA4/PSMA5	19
BP	GO:0051085	chaperone cofactor-dependent protein refolding	13/1297	29/17653	3.81865e-08	1.00769e-06	8.34543e-07	HSPA5/HYOU1/HSPA9/HSPA8/HSPA1A/HSPA1B/ERO1A/HSPE1/PTGES3/HSPA4/ST13/TOR1A/DNAJB1	13
BP	GO:0016126	sterol biosynthetic process	21/1297	74/17653	4.58044e-08	1.19632e-06	9.90759e-07	G6PD/CES1/ACAT1/POR/NSDHL/FASN/APOE/DHCR7/RAN/CYB5R3/SCD/KPNB1/ERLIN1/ACAA2/EBP/ACAT2/CNBP/MSMO1/CYP51A1/LBR/FDFT1	21
BP	GO:0030433	ubiquitin-dependent ERAD pathway	21/1297	74/17653	4.58044e-08	1.19632e-06	9.90759e-07	HSPA5/HSP90B1/VCP/BCAP31/CAV1/NPLOC4/FAF2/TRIM25/ERLIN1/PSMC5/PSMC4/UBQLN2/UBXN4/CCDC47/SEC61B/PSMC6/ERLEC1/DERL2/PSMC3/DERL1/OS9	21
BP	GO:0001736	establishment of planar polarity	28/1297	122/17653	4.70896e-08	1.2174e-06	1.00822e-06	CLTC/RHOA/AP2B1/RPS27A/PSMA7/CDC42/AP2A2/PFN1/PSMB6/PSME2/PSMC5/PSMC4/PSMA6/PSMA2/RAC1/PSMB7/PSMA1/PSMC6/PSMB2/AP2A1/PSMD4/PSMD8/SEC24B/PSMC3/PSMB4/PSMA4/PSMA5/PTK7	28
BP	GO:0007164	establishment of tissue polarity	28/1297	122/17653	4.70896e-08	1.2174e-06	1.00822e-06	CLTC/RHOA/AP2B1/RPS27A/PSMA7/CDC42/AP2A2/PFN1/PSMB6/PSME2/PSMC5/PSMC4/PSMA6/PSMA2/RAC1/PSMB7/PSMA1/PSMC6/PSMB2/AP2A1/PSMD4/PSMD8/SEC24B/PSMC3/PSMB4/PSMA4/PSMA5/PTK7	28
BP	GO:0036503	ERAD pathway	24/1297	94/17653	4.87939e-08	1.25509e-06	1.03943e-06	HSPA5/HSP90B1/VCP/BCAP31/UGGT1/CAV1/NPLOC4/FAF2/TRIM25/ERLIN1/HM13/PSMC5/PSMC4/UBQLN2/TOR1A/UBXN4/CCDC47/SEC61B/PSMC6/ERLEC1/DERL2/PSMC3/DERL1/OS9	24
BP	GO:0002495	antigen processing and presentation of peptide antigen via MHC class II	25/1297	101/17653	5.0224e-08	1.28538e-06	1.06452e-06	CLTC/CANX/CTSD/RAB7A/AP2B1/ACTR1A/AP2A2/AP1B1/CLTA/CAPZB/CAPZA1/CAPZA2/SEC31A/AP1G1/DCTN1/DYNC1LI1/LGMN/DYNC1H1/SEC24C/DCTN2/IFI30/AP2A1/KIF2C/SEC24B/KIF26A	25
BP	GO:0071426	ribonucleoprotein complex export from nucleus	29/1297	130/17653	5.31654e-08	1.35386e-06	1.12123e-06	NPM1/HNRNPA2B1/EIF5A/RPSA/DDX39B/SRSF1/SRSF7/RAN/U2AF2/ALYREF/XPO1/RPS15/ABCE1/EIF6/SRSF6/DDX39A/SRSF9/U2AF1/SSB/SRSF3/SRRM1/SRSF2/SRSF10/AGFG1/UPF1/SARNP/EIF4E/RANBP2/MAGOHB	29
BP	GO:0016054	organic acid catabolic process	46/1297	269/17653	6.03974e-08	1.52279e-06	1.26114e-06	ECH1/HADHA/HSD17B10/OAT/ETFA/DLD/ECHS1/ACAT1/HADHB/GLUD1/OGDH/HSD17B4/GOT2/SCP2/CD44/ETFB/DLST/ECI1/ACADM/HIBADH/ACADVL/ACOX1/MCCC2/NDUFAB1/CPT1A/DECR1/HADH/ALDH4A1/GLS/ACAA2/ACAD9/ACADSB/IVD/CHP1/ACAA1/HEXB/PCYOX1/HMGCL/GCSH/ACAT2/GCDH/DECR2/ABCD3/ABHD10/MCAT/CPT2	46
BP	GO:0046395	carboxylic acid catabolic process	46/1297	269/17653	6.03974e-08	1.52279e-06	1.26114e-06	ECH1/HADHA/HSD17B10/OAT/ETFA/DLD/ECHS1/ACAT1/HADHB/GLUD1/OGDH/HSD17B4/GOT2/SCP2/CD44/ETFB/DLST/ECI1/ACADM/HIBADH/ACADVL/ACOX1/MCCC2/NDUFAB1/CPT1A/DECR1/HADH/ALDH4A1/GLS/ACAA2/ACAD9/ACADSB/IVD/CHP1/ACAA1/HEXB/PCYOX1/HMGCL/GCSH/ACAT2/GCDH/DECR2/ABCD3/ABHD10/MCAT/CPT2	46
BP	GO:0002504	antigen processing and presentation of peptide or polysaccharide antigen via MHC class II	25/1297	102/17653	6.19436e-08	1.55408e-06	1.28705e-06	CLTC/CANX/CTSD/RAB7A/AP2B1/ACTR1A/AP2A2/AP1B1/CLTA/CAPZB/CAPZA1/CAPZA2/SEC31A/AP1G1/DCTN1/DYNC1LI1/LGMN/DYNC1H1/SEC24C/DCTN2/IFI30/AP2A1/KIF2C/SEC24B/KIF26A	25
BP	GO:0071166	ribonucleoprotein complex localization	29/1297	131/17653	6.35578e-08	1.58676e-06	1.31412e-06	NPM1/HNRNPA2B1/EIF5A/RPSA/DDX39B/SRSF1/SRSF7/RAN/U2AF2/ALYREF/XPO1/RPS15/ABCE1/EIF6/SRSF6/DDX39A/SRSF9/U2AF1/SSB/SRSF3/SRRM1/SRSF2/SRSF10/AGFG1/UPF1/SARNP/EIF4E/RANBP2/MAGOHB	29
BP	GO:0070482	response to oxygen levels	58/1297	378/17653	6.61723e-08	1.64398e-06	1.3615e-06	ACTN4/HYOU1/HSP90B1/PKM/P4HB/ENO1/CAT/AIFM1/PLOD2/PHB2/PGK1/GNB1/ERO1A/LDHA/LONP1/ICAM1/RHOA/HMOX1/OPA1/DNM1L/RPS27A/PSMA7/HMOX2/TM9SF4/CAV1/ATP6V0D1/CHCHD2/PSMB6/FAM162A/PSME2/PSMC5/ACAA2/PLOD1/PSMC4/PSMA6/HIGD1A/PSMA2/CCDC115/AGTRAP/FIS1/PSMB7/TBL2/PSMA1/PSMC6/LMNA/PSMB2/HP1BP3/ATP1B1/SCFD1/ATP6/ATP6V1A/PSMD4/PSMD8/PSMC3/ELOB/PSMB4/PSMA4/PSMA5	58
BP	GO:0051291	protein heterooligomerization	28/1297	124/17653	6.82402e-08	1.68712e-06	1.39723e-06	ANXA2/XRCC6/GNB1/YWHAB/CTNNA1/MCCC2/JUP/SQSTM1/S100A10/SEPT9/HIST1H4I/HIST1H4A/HIST1H4D/HIST1H4F/HIST1H4K/HIST1H4J/HIST1H4C/HIST1H4H/HIST1H4B/HIST1H4E/HIST1H4L/HIST2H4A/HIST4H4/HIST2H4B/FARSA/NUDT21/FARSB/SEPT7	28
BP	GO:0016999	antibiotic metabolic process	30/1297	139/17653	6.93393e-08	1.70601e-06	1.41288e-06	CAT/IDH2/MDH2/PRDX1/DLD/SDHA/FH/ACO2/PRDX5/OGDH/CS/PRDX3/ALDH1B1/DLST/DLAT/STAT3/PDHB/SUCLG2/IDH3A/NNT/IDH3B/SUCLG1/PARK7/SDHB/PDHA1/RAC1/MDH1/IDH3G/SUCLA2/PRDX2	30
BP	GO:0097193	intrinsic apoptotic signaling pathway	48/1297	290/17653	8.84497e-08	2.15862e-06	1.78772e-06	HYOU1/P4HB/ENO1/HSPA1A/HNRNPK/AIFM1/ERO1A/VDAC2/HSPB1/TRAP1/RPS3/DDX3X/HMOX1/TPT1/CD44/RACK1/BCAP31/ERP29/OPA1/NDUFS3/RPS7/DIABLO/DNM1L/SOD2/SFN/PARP1/CAV1/SFPQ/RPL26/NONO/PARK7/YBX3/CYCS/BID/TXNDC12/DDX5/FIS1/CRIP1/PTPN1/MIF/PRKRA/TNFRSF10B/ARL6IP5/SLC9A3R1/PPIF/USP47/NDUFA13/TMEM109	48
BP	GO:0043039	tRNA aminoacylation	17/1297	52/17653	8.85827e-08	2.15862e-06	1.78772e-06	IARS2/PPA2/SARS2/GARS/QARS/FARSA/VARS/EPRS/AIMP1/LRRC47/GATB/YARS/FARSB/KARS/PPA1/NARS2/DARS	17
BP	GO:0000245	spliceosomal complex assembly	18/1297	58/17653	9.19088e-08	2.22901e-06	1.84601e-06	DDX39B/SRSF1/DDX1/SF1/SRSF6/SNRPD1/SNRPE/SRSF9/SF3A3/SF3A1/LUC7L3/SNRPD2/SNRPC/RBMX/SRSF10/PRPF19/SNRNP200/SNRPD3	18
BP	GO:0019674	NAD metabolic process	20/1297	71/17653	1.09305e-07	2.63835e-06	2.18501e-06	PKM/VCP/ENO1/ALDOA/GAPDH/MDH2/PGK1/OGDH/LDHA/ALDOC/TPI1/GPD2/HK1/PGAM1/LDHB/PFKP/MDH1/NAXE/GPI/NUDT12	20
BP	GO:1990173	protein localization to nucleoplasm	8/1297	11/17653	1.12292e-07	2.68502e-06	2.22367e-06	CCT7/CCT4/CCT2/CCT3/TCP1/CCT6A/CCT8/CCT5	8
BP	GO:1904872	regulation of telomerase RNA localization to Cajal body	10/1297	18/17653	1.12293e-07	2.68502e-06	2.22367e-06	CCT7/CCT4/RUVBL1/CCT2/CCT3/TCP1/CCT6A/CCT8/RUVBL2/CCT5	10
BP	GO:0036294	cellular response to decreased oxygen levels	38/1297	206/17653	1.13773e-07	2.70769e-06	2.24244e-06	HYOU1/P4HB/ENO1/AIFM1/PHB2/PGK1/GNB1/ERO1A/ICAM1/HMOX1/OPA1/DNM1L/RPS27A/PSMA7/CHCHD2/PSMB6/FAM162A/PSME2/PSMC5/ACAA2/PSMC4/PSMA6/HIGD1A/PSMA2/PSMB7/TBL2/PSMA1/PSMC6/LMNA/PSMB2/HP1BP3/PSMD4/PSMD8/PSMC3/ELOB/PSMB4/PSMA4/PSMA5	38
BP	GO:0043254	regulation of protein complex assembly	64/1297	441/17653	1.16627e-07	2.7627e-06	2.288e-06	VCP/HSPA8/HSPA1A/HSPA1B/MSN/CTTN/VDAC2/HSP90AA1/FSCN1/HMGB1/ICAM1/RHOA/RPS3/DDX3X/MAPRE1/APOE/RHOC/RACK1/RDX/ACTR3/DNM1L/RHOG/CDC42/PARP1/GSN/PFN1/NAPA/PSMC5/RPL13A/PSMC4/PARK7/CAND1/EPS8L2/CAPZB/CAPZA1/BID/ARPC2/CAPZA2/ARPC4/BAIAP2/SUB1/SH3GLB1/ATXN2L/SPTAN1/RAC1/DCTN1/GBA/RPA2/EIF4G1/VASP/PSMC6/ARPC1B/RALB/ATXN2/ARPC5L/DLG1/PEX14/SEC24B/PSMC3/C15orf62/NCLN/ACTR2/ARPC5/MYADM	64
BP	GO:0034508	centromere complex assembly	17/1297	53/17653	1.21538e-07	2.85251e-06	2.36238e-06	NPM1/RUVBL1/HIST1H4I/HIST1H4A/HIST1H4D/HIST1H4F/HIST1H4K/HIST1H4J/HIST1H4C/HIST1H4H/HIST1H4B/HIST1H4E/HIST1H4L/HIST2H4A/HIST4H4/HIST2H4B/RBBP4	17
BP	GO:0043038	amino acid activation	17/1297	53/17653	1.21538e-07	2.85251e-06	2.36238e-06	IARS2/PPA2/SARS2/GARS/QARS/FARSA/VARS/EPRS/AIMP1/LRRC47/GATB/YARS/FARSB/KARS/PPA1/NARS2/DARS	17
BP	GO:0044282	small molecule catabolic process	62/1297	425/17653	1.52293e-07	3.55792e-06	2.94658e-06	PKM/ENO1/ECH1/ALDOA/HADHA/GAPDH/HSD17B10/OAT/ETFA/DLD/ECHS1/ACAT1/HADHB/PGK1/GLUD1/OGDH/HSD17B4/ALDH1B1/GOT2/SCP2/ALDOC/APOE/CD44/ETFB/DLST/ECI1/ACADM/HIBADH/TPI1/ACADVL/ACOX1/MCCC2/GPD2/NDUFAB1/HK1/PGAM1/CPT1A/DECR1/HADH/ALDH4A1/GLS/ACAA2/ACAD9/ACADSB/IVD/CHP1/ACAA1/PFKP/HEXB/PCYOX1/HMGCL/GCSH/ACAT2/GCDH/GPI/DECR2/UPP1/ABCD3/ABHD10/MCAT/NUDT16/CPT2	62
BP	GO:0021762	substantia nigra development	15/1297	43/17653	1.92521e-07	4.47721e-06	3.70791e-06	HSPA5/ACTB/G6PD/BASP1/GLUD1/ATP5PB/RHOA/YWHAQ/COX6B1/YWHAE/ATP5PF/NDUFS3/CDC42/YWHAH/CNP	15
BP	GO:0006418	tRNA aminoacylation for protein translation	16/1297	49/17653	2.15926e-07	4.99868e-06	4.13978e-06	IARS2/PPA2/SARS2/GARS/QARS/FARSA/VARS/EPRS/AIMP1/LRRC47/YARS/FARSB/KARS/PPA1/NARS2/DARS	16
BP	GO:0090670	RNA localization to Cajal body	10/1297	19/17653	2.21413e-07	5.03418e-06	4.16918e-06	CCT7/CCT4/RUVBL1/CCT2/CCT3/TCP1/CCT6A/CCT8/RUVBL2/CCT5	10
BP	GO:0090671	telomerase RNA localization to Cajal body	10/1297	19/17653	2.21413e-07	5.03418e-06	4.16918e-06	CCT7/CCT4/RUVBL1/CCT2/CCT3/TCP1/CCT6A/CCT8/RUVBL2/CCT5	10
BP	GO:0090672	telomerase RNA localization	10/1297	19/17653	2.21413e-07	5.03418e-06	4.16918e-06	CCT7/CCT4/RUVBL1/CCT2/CCT3/TCP1/CCT6A/CCT8/RUVBL2/CCT5	10
BP	GO:0090685	RNA localization to nucleus	10/1297	19/17653	2.21413e-07	5.03418e-06	4.16918e-06	CCT7/CCT4/RUVBL1/CCT2/CCT3/TCP1/CCT6A/CCT8/RUVBL2/CCT5	10
BP	GO:0019362	pyridine nucleotide metabolic process	33/1297	170/17653	2.25123e-07	5.07323e-06	4.20152e-06	PKM/VCP/ENO1/ALDOA/G6PD/GAPDH/TKT/IDH2/MDH2/DLD/PGK1/OGDH/LDHA/ALDOC/STAT3/ME2/TPI1/PDHB/GPD2/HK1/NNT/PGAM1/EIF6/PGD/LDHB/PDHA1/PFKP/MDH1/NAXE/GPI/MPC1/RANBP2/NUDT12	33
BP	GO:0046496	nicotinamide nucleotide metabolic process	33/1297	170/17653	2.25123e-07	5.07323e-06	4.20152e-06	PKM/VCP/ENO1/ALDOA/G6PD/GAPDH/TKT/IDH2/MDH2/DLD/PGK1/OGDH/LDHA/ALDOC/STAT3/ME2/TPI1/PDHB/GPD2/HK1/NNT/PGAM1/EIF6/PGD/LDHB/PDHA1/PFKP/MDH1/NAXE/GPI/MPC1/RANBP2/NUDT12	33
BP	GO:0036293	response to decreased oxygen levels	54/1297	354/17653	2.27274e-07	5.09915e-06	4.22299e-06	ACTN4/HYOU1/HSP90B1/PKM/P4HB/ENO1/CAT/AIFM1/PLOD2/PHB2/PGK1/GNB1/ERO1A/LDHA/LONP1/ICAM1/RHOA/HMOX1/OPA1/DNM1L/RPS27A/PSMA7/HMOX2/TM9SF4/CAV1/CHCHD2/PSMB6/FAM162A/PSME2/PSMC5/ACAA2/PLOD1/PSMC4/PSMA6/HIGD1A/PSMA2/AGTRAP/FIS1/PSMB7/TBL2/PSMA1/PSMC6/LMNA/PSMB2/HP1BP3/ATP1B1/SCFD1/PSMD4/PSMD8/PSMC3/ELOB/PSMB4/PSMA4/PSMA5	54
BP	GO:0006733	oxidoreduction coenzyme metabolic process	35/1297	187/17653	2.4765e-07	5.53193e-06	4.58141e-06	PKM/VCP/ENO1/ALDOA/G6PD/GAPDH/TKT/IDH2/MDH2/DLD/PGK1/OGDH/LDHA/ALDOC/STAT3/ME2/TPI1/PDHB/GPD2/HK1/NNT/PGAM1/EIF6/NDUFA9/PGD/LDHB/PDHA1/PFKP/FDXR/MDH1/NAXE/GPI/MPC1/RANBP2/NUDT12	35
BP	GO:0001666	response to hypoxia	53/1297	346/17653	2.5658e-07	5.70638e-06	4.72588e-06	ACTN4/HYOU1/HSP90B1/PKM/P4HB/ENO1/CAT/PLOD2/PHB2/PGK1/GNB1/ERO1A/LDHA/LONP1/ICAM1/RHOA/HMOX1/OPA1/DNM1L/RPS27A/PSMA7/HMOX2/TM9SF4/CAV1/CHCHD2/PSMB6/FAM162A/PSME2/PSMC5/ACAA2/PLOD1/PSMC4/PSMA6/HIGD1A/PSMA2/AGTRAP/FIS1/PSMB7/TBL2/PSMA1/PSMC6/LMNA/PSMB2/HP1BP3/ATP1B1/SCFD1/PSMD4/PSMD8/PSMC3/ELOB/PSMB4/PSMA4/PSMA5	53
BP	GO:1904837	beta-catenin-TCF complex assembly	15/1297	44/17653	2.72345e-07	6.03067e-06	4.99445e-06	RUVBL1/HIST1H4I/HIST1H4A/HIST1H4D/HIST1H4F/HIST1H4K/HIST1H4J/HIST1H4C/HIST1H4H/HIST1H4B/HIST1H4E/HIST1H4L/HIST2H4A/HIST4H4/HIST2H4B	15
BP	GO:1903829	positive regulation of cellular protein localization	53/1297	347/17653	2.81743e-07	6.21176e-06	5.14443e-06	HSP90AB1/MSN/ITGB1/CCT7/EZR/RTN4/YWHAZ/YWHAB/AP2B1/YWHAG/CCT4/RUVBL1/YWHAQ/AGR2/CCT2/CCT3/YWHAE/RACK1/BCAP31/RDX/TCP1/IQGAP1/CCT6A/RHOG/CCT8/TM9SF4/CDC42/SFN/JUP/YWHAH/MESD/SQSTM1/PARK7/CHP1/ITGA3/BID/CCT5/EMD/ACSL3/SH3GLB1/FIS1/UBE2L3/CNPY4/MFF/PSMB7/RER1/DDRGK1/EPB41L2/DLG1/PSMD8/TOMM7/PDCD5/CEP290	53
BP	GO:0006914	autophagy	67/1297	482/17653	3.04151e-07	6.64825e-06	5.50592e-06	CLTC/VCP/EEF1A1/HSPA8/GAPDH/CTSD/EEF1A2/VDAC1/PSAP/CTTN/RAB7A/HSP90AA1/TOMM40/HMGB1/HSPB1/RUVBL1/HMOX1/TOMM70/RAB1B/RAB1A/DNM1L/RPS27A/VMP1/CTSA/TOMM22/GNAI3/ATP6V0D1/SEC22B/TOMM20/ATP5IF1/SQSTM1/MTDH/PARK7/PGAM5/SPTLC1/LARP1/LAMP2/CSNK2A1/SH3GLB1/CAPNS1/FIS1/RAB8A/UBQLN2/GBA/RAB23/VAMP8/SPTLC2/LAMTOR1/LAMTOR5/EIF4G1/POLDIP2/TOMM6/RALB/SNRNP70/EIF4G2/SCFD1/ATP6V1A/LAMTOR3/TOMM7/STX12/PIK3C3/PTK2/…	67
BP	GO:0061919	process utilizing autophagic mechanism	67/1297	482/17653	3.04151e-07	6.64825e-06	5.50592e-06	CLTC/VCP/EEF1A1/HSPA8/GAPDH/CTSD/EEF1A2/VDAC1/PSAP/CTTN/RAB7A/HSP90AA1/TOMM40/HMGB1/HSPB1/RUVBL1/HMOX1/TOMM70/RAB1B/RAB1A/DNM1L/RPS27A/VMP1/CTSA/TOMM22/GNAI3/ATP6V0D1/SEC22B/TOMM20/ATP5IF1/SQSTM1/MTDH/PARK7/PGAM5/SPTLC1/LARP1/LAMP2/CSNK2A1/SH3GLB1/CAPNS1/FIS1/RAB8A/UBQLN2/GBA/RAB23/VAMP8/SPTLC2/LAMTOR1/LAMTOR5/EIF4G1/POLDIP2/TOMM6/RALB/SNRNP70/EIF4G2/SCFD1/ATP6V1A/LAMTOR3/TOMM7/STX12/PIK3C3/PTK2/…	67
BP	GO:1902652	secondary alcohol metabolic process	29/1297	141/17653	3.38723e-07	7.37229e-06	6.10555e-06	G6PD/CAT/CES1/ACAT1/POR/NSDHL/HDLBP/FASN/APOE/ACADVL/DHCR7/RAN/CYB5R3/SCD/APOL2/KPNB1/ERLIN1/ACAA2/NPC2/EBP/ACAT2/FDXR/CNBP/LDLR/MSMO1/CYP51A1/LBR/APP/FDFT1	29
BP	GO:0051028	mRNA transport	30/1297	149/17653	3.47333e-07	7.52752e-06	6.2341e-06	LRPPRC/MVP/HNRNPA2B1/EIF5A/HNRNPA1/IGF2BP3/IGF2BP2/IGF2BP1/DDX39B/SRSF1/SRSF7/U2AF2/ALYREF/XPO1/SRSF6/DDX39A/SRSF9/U2AF1/SRSF3/KHSRP/SRRM1/SRSF2/G3BP2/SRSF10/AGFG1/UPF1/SARNP/EIF4E/RANBP2/MAGOHB	30
BP	GO:0048863	stem cell differentiation	44/1297	268/17653	3.81642e-07	8.23603e-06	6.82087e-06	HSPA9/HNRNPU/XRCC5/CFL1/STAT3/RPS27A/PSMA7/NOLC1/PSMB6/PSME2/PSMC5/PSMC4/H3F3A/H3F3B/CORO1C/PSMA6/HIST1H4I/HIST1H4A/HIST1H4D/HIST1H4F/HIST1H4K/HIST1H4J/HIST1H4C/HIST1H4H/HIST1H4B/HIST1H4E/HIST1H4L/HIST2H4A/HIST4H4/HIST2H4B/PSMA2/SEMA4B/TCOF1/PSMB7/PSMA1/PSMC6/PSMB2/OCIAD1/PSMD4/PSMD8/PSMC3/PSMB4/PSMA4/PSMA5	44
BP	GO:0006900	vesicle budding from membrane	23/1297	97/17653	3.93397e-07	8.45388e-06	7.00129e-06	ANXA2/RAB7A/RAB1B/TMED10/RAB1A/TMED9/VAPA/NSF/GOLPH3/NAPA/LMAN1/SNX3/SEC22B/CD59/SAR1A/S100A10/MCFD2/TMED2/SEC31A/VAPB/SEC24C/SCFD1/SEC24B	23
BP	GO:0043486	histone exchange	17/1297	57/17653	3.96336e-07	8.48125e-06	7.02396e-06	NPM1/RUVBL1/HIST1H4I/HIST1H4A/HIST1H4D/HIST1H4F/HIST1H4K/HIST1H4J/HIST1H4C/HIST1H4H/HIST1H4B/HIST1H4E/HIST1H4L/HIST2H4A/HIST4H4/HIST2H4B/RBBP4	17
BP	GO:0071456	cellular response to hypoxia	36/1297	199/17653	4.00264e-07	8.52948e-06	7.0639e-06	HYOU1/P4HB/ENO1/PHB2/PGK1/GNB1/ERO1A/ICAM1/HMOX1/OPA1/RPS27A/PSMA7/CHCHD2/PSMB6/FAM162A/PSME2/PSMC5/ACAA2/PSMC4/PSMA6/HIGD1A/PSMA2/PSMB7/TBL2/PSMA1/PSMC6/LMNA/PSMB2/HP1BP3/PSMD4/PSMD8/PSMC3/ELOB/PSMB4/PSMA4/PSMA5	36
BP	GO:0008203	cholesterol metabolic process	28/1297	135/17653	4.48465e-07	9.5168e-06	7.88157e-06	G6PD/CAT/CES1/POR/NSDHL/HDLBP/FASN/APOE/ACADVL/DHCR7/RAN/CYB5R3/SCD/APOL2/KPNB1/ERLIN1/ACAA2/NPC2/EBP/ACAT2/FDXR/CNBP/LDLR/MSMO1/CYP51A1/LBR/APP/FDFT1	28
BP	GO:0072524	pyridine-containing compound metabolic process	33/1297	175/17653	4.53044e-07	9.57408e-06	7.92901e-06	PKM/VCP/ENO1/ALDOA/G6PD/GAPDH/TKT/IDH2/MDH2/DLD/PGK1/OGDH/LDHA/ALDOC/STAT3/ME2/TPI1/PDHB/GPD2/HK1/NNT/PGAM1/EIF6/PGD/LDHB/PDHA1/PFKP/MDH1/NAXE/GPI/MPC1/RANBP2/NUDT12	33
BP	GO:0034383	low-density lipoprotein particle clearance	13/1297	35/17653	5.47418e-07	1.14276e-05	9.46406e-06	CLTC/ANXA2/HNRNPK/AP2B1/HMOX1/EHD1/CNPY2/AP2A2/NCEH1/CLTA/NPC2/LDLR/AP2A1	13
BP	GO:0006735	NADH regeneration	11/1297	25/17653	5.49728e-07	1.14276e-05	9.46406e-06	PKM/ENO1/ALDOA/GAPDH/PGK1/ALDOC/TPI1/HK1/PGAM1/PFKP/GPI	11
BP	GO:0061621	canonical glycolysis	11/1297	25/17653	5.49728e-07	1.14276e-05	9.46406e-06	PKM/ENO1/ALDOA/GAPDH/PGK1/ALDOC/TPI1/HK1/PGAM1/PFKP/GPI	11
BP	GO:0061718	glucose catabolic process to pyruvate	11/1297	25/17653	5.49728e-07	1.14276e-05	9.46406e-06	PKM/ENO1/ALDOA/GAPDH/PGK1/ALDOC/TPI1/HK1/PGAM1/PFKP/GPI	11
BP	GO:0042176	regulation of protein catabolic process	53/1297	355/17653	5.84699e-07	1.21052e-05	1.00252e-05	FLNA/VCP/EEF1A1/ANXA2/HSPA1A/HSPA1B/HSP90AB1/EEF1A2/PHB/MSN/EZR/RAB7A/HSP90AA1/APOE/RACK1/BCAP31/RDX/RPL5/RPS7/CTSA/CDC42/RPL23/NSF/CAV1/XPO1/PSME2/PSMC5/SNX3/SEC22B/LPCAT1/PSMC4/ATP5IF1/PARK7/CD81/RPL11/CSNK2A1/SUMO2/LDLR/UBQLN2/GBA/SDCBP/DDRGK1/PSMC6/ERLEC1/SNRNP70/DERL2/GIPC1/PSMC3/PTK2/NDUFA13/RNF128/OS9/AGAP2	53
BP	GO:0061418	regulation of transcription from RNA polymerase II promoter in response to hypoxia	20/1297	79/17653	7.29482e-07	1.50415e-05	1.2457e-05	RPS27A/PSMA7/PSMB6/PSME2/PSMC5/PSMC4/PSMA6/HIGD1A/PSMA2/PSMB7/PSMA1/PSMC6/PSMB2/PSMD4/PSMD8/PSMC3/ELOB/PSMB4/PSMA4/PSMA5	20
BP	GO:2001234	negative regulation of apoptotic signaling pathway	37/1297	213/17653	7.84097e-07	1.61025e-05	1.33356e-05	HYOU1/ENO1/HSPA1A/HSPA1B/CTTN/VDAC2/HSPB1/ICAM1/TRAP1/DDX3X/HMOX1/ITGAV/LGALS3/SLC25A5/TPT1/CD44/OPA1/NDUFS3/CTNNA1/SOD2/QARS/ACAA2/NONO/PARK7/YBX3/BID/SERPINE1/TXNDC12/PTPN1/MIF/GSTP1/TNFRSF10B/LMNA/PPIF/USP47/NDUFA13/PRELID1	37
BP	GO:0031146	SCF-dependent proteasomal ubiquitin-dependent protein catabolic process	19/1297	73/17653	8.69148e-07	1.77774e-05	1.47228e-05	RPS27A/PSMA7/PSMB6/PSME2/PSMC5/PSMC4/PSMA6/PSMA2/PSMB7/PSMA1/PSMC6/PSMB2/SKP1/PSMD4/PSMD8/PSMC3/PSMB4/PSMA4/PSMA5	19
BP	GO:0061615	glycolytic process through fructose-6-phosphate	11/1297	26/17653	8.89621e-07	1.80511e-05	1.49495e-05	PKM/ENO1/ALDOA/GAPDH/PGK1/ALDOC/TPI1/HK1/PGAM1/PFKP/GPI	11
BP	GO:0061620	glycolytic process through glucose-6-phosphate	11/1297	26/17653	8.89621e-07	1.80511e-05	1.49495e-05	PKM/ENO1/ALDOA/GAPDH/PGK1/ALDOC/TPI1/HK1/PGAM1/PFKP/GPI	11
BP	GO:0072329	monocarboxylic acid catabolic process	27/1297	132/17653	9.55293e-07	1.92799e-05	1.59671e-05	ECH1/HADHA/ETFA/ECHS1/ACAT1/HADHB/HSD17B4/SCP2/ETFB/ECI1/ACADM/ACADVL/ACOX1/NDUFAB1/CPT1A/DECR1/HADH/ACAA2/ACAD9/IVD/ACAA1/ACAT2/GCDH/DECR2/ABCD3/MCAT/CPT2	27
BP	GO:0018208	peptidyl-proline modification	16/1297	54/17653	9.57749e-07	1.92799e-05	1.59671e-05	P4HB/P4HA1/PPIA/PPIB/P4HA2/FKBP10/P3H1/FKBP2/P3H2/FKBP8/FKBP3/PIN4/CRTAP/FKBP9/RANBP2/PPIF	16
BP	GO:1905477	positive regulation of protein localization to membrane	25/1297	117/17653	1.02355e-06	2.05233e-05	1.69969e-05	ITGB1/EZR/YWHAZ/YWHAB/AP2B1/YWHAG/YWHAQ/AGR2/YWHAE/RACK1/RHOG/SFN/YWHAH/MESD/SQSTM1/CHP1/ITGA3/BID/ACSL3/FIS1/CNPY4/MFF/RER1/DLG1/PDCD5	25
BP	GO:0070203	regulation of establishment of protein localization to telomere	7/1297	10/17653	1.12065e-06	2.22204e-05	1.84023e-05	CCT7/CCT4/CCT2/TCP1/CCT6A/CCT8/CCT5	7
BP	GO:0072321	chaperone-mediated protein transport	7/1297	10/17653	1.12065e-06	2.22204e-05	1.84023e-05	HSPA8/TIMM13/TIMM9/TIMM8A/TOR1A/TIMM8B/TIMM10	7
BP	GO:0006631	fatty acid metabolic process	54/1297	372/17653	1.12127e-06	2.22204e-05	1.84023e-05	ECH1/HADHA/ETFA/CES1/DLD/ECHS1/ACAT1/HADHB/POR/HSD17B4/FASN/SCP2/ETFB/ECI1/DLAT/ACADM/PON2/PDHB/ACADVL/ACOX1/NDUFAB1/CAV1/PTGES3/SCD/CPT1A/DECR1/ERLIN1/EIF6/HADH/ACAA2/ACAD9/HACD3/ACADSB/IVD/PTGES2/PDHA1/ACAA1/ACSL3/HSD17B12/ACAT2/GCDH/MIF/MSMO1/FADS2/GSTP1/ANXA1/DECR2/ABCD3/ZADH2/TECR/NDUFS6/ACOT7/MCAT/CPT2	54
BP	GO:0006637	acyl-CoA metabolic process	23/1297	103/17653	1.22149e-06	2.40195e-05	1.98924e-05	DLD/ACAT1/OGDH/HSD17B4/FASN/DLST/DLAT/PDHB/SUCLG2/SCD/SUCLG1/PDHA1/HMGCL/ACSL3/HSD17B12/GCDH/SLC25A1/DBI/MPC1/SUCLA2/TECR/ACOT9/ACOT7	23
BP	GO:0035383	thioester metabolic process	23/1297	103/17653	1.22149e-06	2.40195e-05	1.98924e-05	DLD/ACAT1/OGDH/HSD17B4/FASN/DLST/DLAT/PDHB/SUCLG2/SCD/SUCLG1/PDHA1/HMGCL/ACSL3/HSD17B12/GCDH/SLC25A1/DBI/MPC1/SUCLA2/TECR/ACOT9/ACOT7	23
BP	GO:0032799	low-density lipoprotein receptor particle metabolic process	10/1297	22/17653	1.26307e-06	2.47416e-05	2.04904e-05	CLTC/ANXA2/HNRNPK/AP2B1/ITGAV/APOE/CNPY2/AP2A2/CLTA/AP2A1	10
BP	GO:2001243	negative regulation of intrinsic apoptotic signaling pathway	22/1297	96/17653	1.30184e-06	2.54034e-05	2.10384e-05	HYOU1/ENO1/HSPA1A/VDAC2/HSPB1/TRAP1/DDX3X/TPT1/CD44/OPA1/NDUFS3/SOD2/NONO/PARK7/YBX3/BID/TXNDC12/PTPN1/MIF/PPIF/USP47/NDUFA13	22
BP	GO:0007029	endoplasmic reticulum organization	15/1297	49/17653	1.31548e-06	2.55715e-05	2.11777e-05	RTN4/ATL3/RAB10/VMP1/LMAN1/LMAN2/TOR1AIP2/RTN3/SEC31A/VAPB/SEC61A1/CCDC47/TMEM33/RAB18/ARL6IP1	15
BP	GO:0043618	regulation of transcription from RNA polymerase II promoter in response to stress	25/1297	119/17653	1.42564e-06	2.76076e-05	2.28639e-05	HSPA5/HSPA1A/GCN1/HMOX1/RPS27A/PSMA7/PSMB6/PSME2/PSMC5/PSMC4/PSMA6/HIGD1A/PSMA2/PSMB7/PSMA1/PSMC6/PSMB2/DNAJB1/PSMD4/PSMD8/PSMC3/ELOB/PSMB4/PSMA4/PSMA5	25
BP	GO:0006369	termination of RNA polymerase II transcription	18/1297	69/17653	1.61957e-06	3.12441e-05	2.58756e-05	DDX39B/SRSF1/SRSF7/U2AF2/ALYREF/SRSF6/SNRPE/DDX39A/SRSF9/U2AF1/SRSF3/SRRM1/SRSF2/NUDT21/SARNP/MAGOHB/SNRPB/SNRPD3	18
BP	GO:0016125	sterol metabolic process	29/1297	153/17653	1.98854e-06	3.82174e-05	3.16507e-05	G6PD/CAT/CES1/ACAT1/POR/NSDHL/HDLBP/FASN/APOE/ACADVL/DHCR7/RAN/CYB5R3/SCD/APOL2/KPNB1/ERLIN1/ACAA2/NPC2/EBP/ACAT2/FDXR/CNBP/LDLR/MSMO1/CYP51A1/LBR/APP/FDFT1	29
BP	GO:0000380	alternative mRNA splicing, via spliceosome	16/1297	57/17653	2.13019e-06	4.06332e-05	3.36514e-05	PTBP1/HNRNPU/HNRNPA1/HNRNPL/DDX17/SRSF1/HNRNPM/SFPQ/SRSF6/THRAP3/SF3A1/DDX5/SRSF2/RBMX/RBM4/TRA2B	16
BP	GO:0034381	plasma lipoprotein particle clearance	16/1297	57/17653	2.13019e-06	4.06332e-05	3.36514e-05	CLTC/ANXA2/HNRNPK/HDLBP/AP2B1/HMOX1/APOE/EHD1/CNPY2/AP2A2/NCEH1/CLTA/NPC2/LDLR/AP2A1/LRPAP1	16
BP	GO:0034599	cellular response to oxidative stress	44/1297	286/17653	2.33617e-06	4.43959e-05	3.67676e-05	P4HB/G6PD/HSPA1A/HSPA1B/CAT/PRDX1/AIFM1/PSAP/PRDX5/ERO1A/LONP1/ATP2A2/PRDX3/HSPB1/TRAP1/RPS3/HMOX1/PYCR1/RACK1/DIABLO/SOD2/PARP1/PYCR2/SFPQ/SLC25A24/NONO/PARK7/CYCS/RHOB/PNPT1/TXN/HNRNPD/PRKRA/GSTP1/ANXA1/TXNRD1/ARL6IP5/PRDX2/PXN/ROMO1/PPIF/VKORC1L1/PCNA/STAU1	44
BP	GO:0070498	interleukin-1-mediated signaling pathway	22/1297	100/17653	2.69418e-06	5.10092e-05	4.22445e-05	RPS27A/PSMA7/PSMB6/PSME2/PSMC5/PSMC4/SQSTM1/PSMA6/UBE2N/PSMA2/PSMB7/PSMA1/PSMC6/PSMB2/SKP1/PSMD4/PSMD8/PSMC3/PSMB4/PSMA4/PSMA5/NOD1	22
BP	GO:0010389	regulation of G2/M transition of mitotic cell cycle	34/1297	198/17653	2.8312e-06	5.34049e-05	4.42286e-05	TUBB/TUBB4B/HSP90AA1/YWHAG/MAPRE1/YWHAE/RPS27A/ACTR1A/PSMA7/PSMB6/PSME2/PSMC5/PSMC4/PSMA6/PSMA2/DCTN1/DYNC1H1/PSMB7/APP/PSMA1/PSMC6/PSMB2/DCTN2/SKP1/PSMD4/PSMD8/PSMC3/PSMB4/PSMA4/PSMA5/USP47/CEP290/CEP70/FANCI	34
BP	GO:0070202	regulation of establishment of protein localization to chromosome	7/1297	11/17653	2.88529e-06	5.40249e-05	4.4742e-05	CCT7/CCT4/CCT2/TCP1/CCT6A/CCT8/CCT5	7
BP	GO:1904816	positive regulation of protein localization to chromosome, telomeric region	7/1297	11/17653	2.88529e-06	5.40249e-05	4.4742e-05	CCT7/CCT4/CCT2/TCP1/CCT6A/CCT8/CCT5	7
BP	GO:1903313	positive regulation of mRNA metabolic process	17/1297	65/17653	3.02035e-06	5.63467e-05	4.66649e-05	HSPA8/HSPA1A/PABPC1/HNRNPR/THRAP3/KHSRP/DAZAP1/PNPT1/HNRNPD/GIGYF2/SF3B4/RBMX/NUDT21/PRPF19/UPF1/SNRNP70/TRA2B	17
BP	GO:0046364	monosaccharide biosynthetic process	20/1297	86/17653	3.06698e-06	5.70078e-05	4.72125e-05	ENO1/ALDOA/G6PD/GAPDH/TKT/MDH2/PGK1/SLC25A13/GOT2/ALDOC/TPI1/GPD2/PGAM1/PGD/SLC25A12/SLC25A10/SLC25A1/MDH1/GPI/SLC25A11	20
BP	GO:0033238	regulation of cellular amine metabolic process	19/1297	79/17653	3.15896e-06	5.8292e-05	4.8276e-05	PSMA7/COMT/PSMB6/PSME2/PSMC5/PSMC4/PARK7/PSMA6/PSMA2/PSMB7/PSMA1/PSMC6/PSMB2/PSMD4/PSMD8/PSMC3/PSMB4/PSMA4/PSMA5	19
BP	GO:0043044	ATP-dependent chromatin remodeling	19/1297	79/17653	3.15896e-06	5.8292e-05	4.8276e-05	ACTB/NPM1/RUVBL1/HNRNPC/HIST1H4I/HIST1H4A/HIST1H4D/HIST1H4F/HIST1H4K/HIST1H4J/HIST1H4C/HIST1H4H/HIST1H4B/HIST1H4E/HIST1H4L/HIST2H4A/HIST4H4/HIST2H4B/RBBP4	19
BP	GO:0030970	retrograde protein transport, ER to cytosol	11/1297	29/17653	3.24269e-06	5.91937e-05	4.90227e-05	HSP90B1/VCP/BCAP31/NPLOC4/FAF2/HM13/SEC61B/ERLEC1/DERL2/DERL1/OS9	11
BP	GO:0050686	negative regulation of mRNA processing	11/1297	29/17653	3.24269e-06	5.91937e-05	4.90227e-05	PTBP1/HNRNPK/HNRNPA2B1/C1QBP/SRSF7/U2AF2/SRSF6/SRSF9/RBMX/SRSF10/TRA2B	11
BP	GO:1903513	endoplasmic reticulum to cytosol transport	11/1297	29/17653	3.24269e-06	5.91937e-05	4.90227e-05	HSP90B1/VCP/BCAP31/NPLOC4/FAF2/HM13/SEC61B/ERLEC1/DERL2/DERL1/OS9	11
BP	GO:0010499	proteasomal ubiquitin-independent protein catabolic process	10/1297	24/17653	3.34303e-06	6.0744e-05	5.03067e-05	PSMA7/PSMB6/PSMA6/PSMA2/PSMB7/PSMA1/PSMB2/PSMB4/PSMA4/PSMA5	10
BP	GO:0034975	protein folding in endoplasmic reticulum	8/1297	15/17653	3.35148e-06	6.0744e-05	5.03067e-05	HSPA5/HSP90B1/PDIA3/CALR/CANX/ERO1A/EMC2/EMC1	8
BP	GO:0008637	apoptotic mitochondrial changes	25/1297	125/17653	3.65852e-06	6.58405e-05	5.45274e-05	HSPD1/HSPA1A/TIMM50/YWHAZ/YWHAB/YWHAG/YWHAQ/YWHAE/SLC25A5/OPA1/DNM1L/SOD2/SFN/YWHAH/NDUFS1/FAM162A/ACAA2/ATP5IF1/BID/FIS1/MFF/LMNA/PPIF/PDCD5/PRELID1	25
BP	GO:0043620	regulation of DNA-templated transcription in response to stress	25/1297	125/17653	3.65852e-06	6.58405e-05	5.45274e-05	HSPA5/HSPA1A/GCN1/HMOX1/RPS27A/PSMA7/PSMB6/PSME2/PSMC5/PSMC4/PSMA6/HIGD1A/PSMA2/PSMB7/PSMA1/PSMC6/PSMB2/DNAJB1/PSMD4/PSMD8/PSMC3/ELOB/PSMB4/PSMA4/PSMA5	25
BP	GO:0006979	response to oxidative stress	59/1297	436/17653	3.67474e-06	6.58995e-05	5.45763e-05	EEF2/P4HB/G6PD/HSPA1A/HSPA1B/KRT1/CAT/PRDX1/AIFM1/PSAP/PRDX5/ERO1A/LDHA/LONP1/ATP2A2/PRDX3/HSPB1/TRAP1/RPS3/HMOX1/PYCR1/APOE/RACK1/PON2/DIABLO/SOD2/HMOX2/PARP1/PYCR2/SFPQ/SLC25A24/NONO/PARK7/CYCS/RHOB/PNPT1/TXN/HNRNPD/KPNA4/TOR1A/NDUFB4/PRKRA/NDUFS8/GSTP1/NDUFS2/ANXA1/APP/TXNRD1/NDUFA12/ARL6IP5/PRDX2/PXN/S100A7/ROMO1/PPIF/TRA2B/VKORC1L1/PCNA/STAU1	59
BP	GO:0031145	anaphase-promoting complex-dependent catabolic process	19/1297	80/17653	3.86066e-06	6.87494e-05	5.69365e-05	RPS27A/PSMA7/PSMB6/PSME2/PSMC5/PSMC4/PSMA6/PSMA2/BUB3/PSMB7/PSMA1/PSMC6/PSMB2/PSMD4/PSMD8/PSMC3/PSMB4/PSMA4/PSMA5	19
BP	GO:0048194	Golgi vesicle budding	19/1297	80/17653	3.86066e-06	6.87494e-05	5.69365e-05	RAB1B/TMED10/RAB1A/TMED9/VAPA/NSF/GOLPH3/NAPA/LMAN1/SEC22B/CD59/SAR1A/MCFD2/TMED2/SEC31A/VAPB/SEC24C/SCFD1/SEC24B	19
BP	GO:0038061	NIK/NF-kappaB signaling	25/1297	126/17653	4.25041e-06	7.54263e-05	6.24661e-05	ACTN4/CALR/RPS3/RPS27A/PSMA7/PSMB6/PSME2/PSMC5/PSMC4/PSMA6/PSMA2/TNFRSF10B/PSMB7/APP/PSMA1/PSMC6/PSMB2/SKP1/PSMD4/PSMD8/PSMC3/PSMB4/PSMA4/PSMA5/NOD1	25
BP	GO:0016236	macroautophagy	44/1297	293/17653	4.46507e-06	7.87783e-05	6.52422e-05	VCP/GAPDH/VDAC1/RAB7A/TOMM40/HMOX1/TOMM70/RAB1B/RAB1A/RPS27A/VMP1/TOMM22/GNAI3/ATP6V0D1/SEC22B/TOMM20/SQSTM1/PGAM5/SPTLC1/LARP1/LAMP2/CSNK2A1/SH3GLB1/CAPNS1/UBQLN2/GBA/RAB23/VAMP8/SPTLC2/LAMTOR1/LAMTOR5/POLDIP2/TOMM6/RALB/SCFD1/ATP6V1A/LAMTOR3/TOMM7/STX12/PIK3C3/TOMM5/NOD1/SNX5/CALCOCO2	44
BP	GO:2001235	positive regulation of apoptotic signaling pathway	31/1297	176/17653	4.47024e-06	7.87783e-05	6.52422e-05	PDIA3/YWHAZ/YWHAB/YWHAG/RPS3/YWHAQ/YWHAE/RACK1/BCAP31/CTNNA1/RPS7/DNM1L/PPP1CA/SFN/GSN/CAV1/YWHAH/FAM162A/SFPQ/RPL26/ATP5IF1/PARK7/BID/FIS1/PRKRA/MFF/TNFRSF10B/PPP2R1B/SLC9A3R1/PPIF/PDCD5	31
BP	GO:0000027	ribosomal large subunit assembly	11/1297	30/17653	4.78095e-06	8.38532e-05	6.94452e-05	RPL3/RPL6/RPL10/RPL23A/RPL5/RPL12/RPL24/RPL11/MRPL11/RPL38/MRPL20	11
BP	GO:0046718	viral entry into host cell	24/1297	119/17653	4.88693e-06	8.38532e-05	6.94452e-05	P4HB/HSPA1A/HSPA1B/PPIA/ITGB1/TFRC/RPSA/ICAM1/LGALS1/ITGAV/ANPEP/GSN/CAV1/TRIM25/SNX3/LAMP1/CTSB/CD81/LDLR/VAMP8/ITGB5/F11R/NECTIN2/ITGA5	24
BP	GO:0006090	pyruvate metabolic process	26/1297	135/17653	4.88993e-06	8.38532e-05	6.94452e-05	PKM/ENO1/ALDOA/GAPDH/DLD/PGK1/BSG/OGDH/LDHA/ALDOC/DLAT/STAT3/ME2/TPI1/PDHB/SLC16A3/HK1/PGAM1/EIF6/LDHB/PDHA1/PFKP/ME3/GPI/MPC1/RANBP2	26
BP	GO:0030260	entry into host cell	26/1297	135/17653	4.88993e-06	8.38532e-05	6.94452e-05	P4HB/HSPA1A/HSPA1B/PPIA/ITGB1/TFRC/RPSA/ICAM1/LGALS1/ITGAV/CTNND1/RPS27A/ANPEP/GSN/CAV1/TRIM25/SNX3/LAMP1/CTSB/CD81/LDLR/VAMP8/ITGB5/F11R/NECTIN2/ITGA5	26
BP	GO:0031123	RNA 3'-end processing	26/1297	135/17653	4.88993e-06	8.38532e-05	6.94452e-05	HSD17B10/PABPC1/RPSA/DDX39B/SRSF1/SRSF7/U2AF2/ALYREF/SRSF6/GRSF1/DDX39A/SRSF9/U2AF1/SSB/SRSF3/PNPT1/SRRM1/SRSF2/FBL/NUDT21/ELAC2/APP/RPS21/SARNP/TRMT10C/MAGOHB	26
BP	GO:0044409	entry into host	26/1297	135/17653	4.88993e-06	8.38532e-05	6.94452e-05	P4HB/HSPA1A/HSPA1B/PPIA/ITGB1/TFRC/RPSA/ICAM1/LGALS1/ITGAV/CTNND1/RPS27A/ANPEP/GSN/CAV1/TRIM25/SNX3/LAMP1/CTSB/CD81/LDLR/VAMP8/ITGB5/F11R/NECTIN2/ITGA5	26
BP	GO:0051806	entry into cell of other organism involved in symbiotic interaction	26/1297	135/17653	4.88993e-06	8.38532e-05	6.94452e-05	P4HB/HSPA1A/HSPA1B/PPIA/ITGB1/TFRC/RPSA/ICAM1/LGALS1/ITGAV/CTNND1/RPS27A/ANPEP/GSN/CAV1/TRIM25/SNX3/LAMP1/CTSB/CD81/LDLR/VAMP8/ITGB5/F11R/NECTIN2/ITGA5	26
BP	GO:0051828	entry into other organism involved in symbiotic interaction	26/1297	135/17653	4.88993e-06	8.38532e-05	6.94452e-05	P4HB/HSPA1A/HSPA1B/PPIA/ITGB1/TFRC/RPSA/ICAM1/LGALS1/ITGAV/CTNND1/RPS27A/ANPEP/GSN/CAV1/TRIM25/SNX3/LAMP1/CTSB/CD81/LDLR/VAMP8/ITGB5/F11R/NECTIN2/ITGA5	26
BP	GO:0051651	maintenance of location in cell	21/1297	96/17653	4.96841e-06	8.4913e-05	7.03229e-05	HSPA5/PDIA3/EZR/HNRNPU/APOE/TLN1/FLNB/GOLPH3/JUP/HK1/GSN/ALB/CAV1/PARK7/DBN1/TXN/RANGAP1/RER1/FTH1/SKP1/OS9	21
BP	GO:1903362	regulation of cellular protein catabolic process	37/1297	231/17653	5.69259e-06	9.69644e-05	8.03035e-05	VCP/ANXA2/HSPA1A/HSPA1B/HSP90AB1/MSN/EZR/HSP90AA1/APOE/RACK1/BCAP31/RDX/RPL5/RPS7/RPL23/CAV1/PSME2/PSMC5/PSMC4/ATP5IF1/PARK7/CD81/RPL11/SUMO2/LDLR/UBQLN2/GBA/SDCBP/DDRGK1/PSMC6/ERLEC1/DERL2/GIPC1/PSMC3/PTK2/RNF128/OS9	37
BP	GO:0032507	maintenance of protein location in cell	18/1297	75/17653	5.8901e-06	9.99633e-05	8.27871e-05	HSPA5/PDIA3/EZR/HNRNPU/TLN1/FLNB/GOLPH3/JUP/HK1/GSN/CAV1/PARK7/DBN1/TXN/RANGAP1/RER1/SKP1/OS9	18
BP	GO:0010972	negative regulation of G2/M transition of mitotic cell cycle	21/1297	97/17653	5.9079e-06	9.99633e-05	8.27871e-05	RPS27A/PSMA7/PSMB6/PSME2/PSMC5/PSMC4/PSMA6/PSMA2/PSMB7/PSMA1/PSMC6/PSMB2/SKP1/PSMD4/PSMD8/PSMC3/PSMB4/PSMA4/PSMA5/USP47/FANCI	21
BP	GO:0061684	chaperone-mediated autophagy	7/1297	12/17653	6.48361e-06	0.000109341	9.05536e-05	EEF1A1/HSPA8/EEF1A2/HSP90AA1/CTSA/LAMP2/SNRNP70	7
BP	GO:0016233	telomere capping	15/1297	55/17653	6.53457e-06	0.000109837	9.09641e-05	HIST1H4I/HIST1H4A/HIST1H4D/HIST1H4F/HIST1H4K/HIST1H4J/HIST1H4C/HIST1H4H/HIST1H4B/HIST1H4E/HIST1H4L/HIST2H4A/HIST4H4/HIST2H4B/HNRNPD	15
BP	GO:0010952	positive regulation of peptidase activity	32/1297	188/17653	6.64603e-06	0.000111343	9.22114e-05	HSPD1/VCP/AIFM1/HMGB1/RHOA/RPS3/DDX3X/ASPH/RACK1/BCAP31/STAT3/HSPE1/DIABLO/GSN/CAV1/FAM162A/PSME2/CYCS/BID/FIS1/TNFRSF10B/APP/DDRGK1/BCL2L13/KARS/ARL6IP5/PICALM/HIP1/NDUFA13/PDCD5/NOD1/PRELID1	32
BP	GO:0035567	non-canonical Wnt signaling pathway	28/1297	154/17653	6.84938e-06	0.000114373	9.47212e-05	CLTC/GNB1/RHOA/AP2B1/RPS27A/PSMA7/CDC42/AP2A2/PFN1/PSMB6/PSME2/PSMC5/PSMC4/PSMA6/PSMA2/RAC1/PSMB7/PSMA1/PSMC6/PSMB2/AP2A1/PSMD4/PSMD8/PSMC3/PSMB4/PSMA4/PSMA5/PTK7	28
BP	GO:0009108	coenzyme biosynthetic process	38/1297	242/17653	6.89516e-06	0.000114427	9.47652e-05	PKM/ENO1/ALDOA/GAPDH/IDH2/DLD/ACAT1/PGK1/OGDH/LDHA/MTHFD1/FASN/ALDOC/DLAT/STAT3/TPI1/PDHB/HK1/SCD/PGAM1/EIF6/NDUFA9/ATP5IF1/PDHA1/PFKP/ACSL3/HSD17B12/FDXR/GCDH/SLC25A1/NAXE/GART/GPI/MPC1/TECR/ACOT7/RANBP2/NUDT12	38
BP	GO:0006007	glucose catabolic process	11/1297	31/17653	6.91996e-06	0.000114427	9.47652e-05	PKM/ENO1/ALDOA/GAPDH/PGK1/ALDOC/TPI1/HK1/PGAM1/PFKP/GPI	11
BP	GO:0033120	positive regulation of RNA splicing	11/1297	31/17653	6.91996e-06	0.000114427	9.47652e-05	HSPA8/HSPA1A/SRSF1/U2AF2/THRAP3/DAZAP1/SF3B4/RBMX/PRPF19/SNRNP70/TRA2B	11
BP	GO:0009895	negative regulation of catabolic process	41/1297	270/17653	7.09215e-06	0.000116894	9.68089e-05	FLNA/LRPPRC/ANXA2/HSP90AB1/PHB/PABPC1/YBX1/HNRNPU/HMOX1/SLIRP/STAT3/RPL5/SYNCRIP/RPS7/IGF2BP1/CTSA/RPL23/TARDBP/HNRNPC/HNRNPA0/SNX3/SEC22B/PARK7/YBX3/RPL11/LARP1/THRAP3/HNRNPD/SDCBP/EIF4G1/POLDIP2/FMC1/ERLEC1/SNRNP70/DERL2/EIF4G2/SCFD1/GIPC1/PTK2/OS9/AGAP2	41
BP	GO:0045652	regulation of megakaryocyte differentiation	18/1297	76/17653	7.19376e-06	0.000118187	9.78791e-05	EIF6/H3F3A/H3F3B/HIST1H4I/HIST1H4A/HIST1H4D/HIST1H4F/HIST1H4K/HIST1H4J/HIST1H4C/HIST1H4H/HIST1H4B/HIST1H4E/HIST1H4L/HIST2H4A/HIST4H4/HIST2H4B/DPY30	18
BP	GO:0072659	protein localization to plasma membrane	37/1297	234/17653	7.71004e-06	0.000126261	0.000104566	FLNA/CLTC/ANXA2/KRT18/ITGB1/BSG/EZR/AGR2/RACK1/RDX/RAB10/RHOG/VAMP3/NSF/GOLPH3/JUP/SQSTM1/S100A10/ITGA3/TMED2/STX7/CSNK2A1/ACSL3/RAB8A/VAMP8/RAB34/CNPY4/CDH2/ATP1B3/RER1/F11R/ATP1B1/DLG1/PICALM/SLC9A3R1/VAMP7/MYADM	37
BP	GO:0043281	regulation of cysteine-type endopeptidase activity involved in apoptotic process	35/1297	216/17653	7.7787e-06	0.000126572	0.000104823	HSPD1/VCP/AIFM1/POR/PRDX5/PRDX3/HMGB1/RHOA/RPS3/DDX3X/YWHAE/CD44/RACK1/BCAP31/HSPE1/DIABLO/SFN/GSN/FAM162A/PARK7/CYCS/BID/CSNK2A1/FIS1/GPI/LAMTOR5/TNFRSF10B/BCL2L13/ARL6IP5/HIP1/USP47/NDUFA13/PDCD5/ARL6IP1/NOD1	35
BP	GO:1902749	regulation of cell cycle G2/M phase transition	35/1297	216/17653	7.7787e-06	0.000126572	0.000104823	NPM1/TUBB/TUBB4B/HSP90AA1/YWHAG/MAPRE1/YWHAE/RPS27A/ACTR1A/PSMA7/PSMB6/PSME2/PSMC5/PSMC4/PSMA6/PSMA2/DCTN1/DYNC1H1/PSMB7/APP/PSMA1/PSMC6/PSMB2/DCTN2/SKP1/PSMD4/PSMD8/PSMC3/PSMB4/PSMA4/PSMA5/USP47/CEP290/CEP70/FANCI	35
BP	GO:0050685	positive regulation of mRNA processing	10/1297	26/17653	7.90248e-06	0.000128176	0.000106152	HSPA8/HSPA1A/THRAP3/DAZAP1/SF3B4/RBMX/NUDT21/PRPF19/SNRNP70/TRA2B	10
BP	GO:0070584	mitochondrion morphogenesis	9/1297	21/17653	7.93162e-06	0.00012824	0.000106206	SLIRP/OPA1/SSBP1/DNM1L/PNPT1/FIS1/MFF/POLDIP2/NDUFS6	9
BP	GO:0006303	double-strand break repair via nonhomologous end joining	18/1297	77/17653	8.75086e-06	0.000140593	0.000116436	XRCC6/XRCC5/UBE2N/HIST1H4I/HIST1H4A/HIST1H4D/HIST1H4F/HIST1H4K/HIST1H4J/HIST1H4C/HIST1H4H/HIST1H4B/HIST1H4E/HIST1H4L/HIST2H4A/HIST4H4/HIST2H4B/PRPF19	18
BP	GO:0006446	regulation of translational initiation	18/1297	77/17653	8.75086e-06	0.000140593	0.000116436	NPM1/HSPB1/DDX3X/DNAJC3/DDX1/EIF4B/PPP1CA/KHDRBS1/EIF4H/RPL13A/EIF3H/EIF2S1/EIF3K/RBM4/EIF4G1/EIF3B/EIF4G2/EIF5	18
BP	GO:0048857	neural nucleus development	16/1297	63/17653	8.85582e-06	0.000141832	0.000117462	HSPA5/ACTB/G6PD/BASP1/GLUD1/ATP5PB/RHOA/YWHAQ/COX6B1/YWHAE/ATP5PF/NDUFS3/CDC42/YWHAH/CNP/SEC24B	16
BP	GO:0002218	activation of innate immune response	44/1297	301/17653	9.03241e-06	0.000144207	0.000119429	HSPD1/HSP90B1/HSPA1A/HSPA1B/XRCC6/XRCC5/C1QBP/HMGB1/MATR3/RPS27A/NRAS/PSMA7/CAV1/NPLOC4/PSMB6/PSME2/SFPQ/PSMC5/PSMC4/NONO/TICAM2/CTSB/PSMA6/UBE2N/PSMA2/LGMN/PSMB7/PSMA1/PSMC6/PSMB2/WDFY1/SKP1/PSMD4/PSMD8/CNPY3/ERBIN/PSMC3/PSPC1/PSMB4/PSMA4/PSMA5/PIK3C3/DDX60/NOD1	44
BP	GO:0034250	positive regulation of cellular amide metabolic process	26/1297	140/17653	9.72671e-06	0.000154807	0.000128207	EEF2/VIM/NPM1/PABPC1/EIF5A/C1QBP/RPS4X/RHOA/DDX3X/RACK1/RPL5/DDX39B/DNAJC3/KHDRBS1/EIF6/RBM3/RPL26/RPS9/MRPS27/YBX3/LARP1/HNRNPD/COA3/APP/PICALM/TRMT10C	26
BP	GO:0048255	mRNA stabilization	12/1297	38/17653	1.05605e-05	0.000167197	0.000138469	PABPC1/YBX1/HNRNPU/SYNCRIP/IGF2BP1/TARDBP/HNRNPC/HNRNPA0/YBX3/LARP1/THRAP3/HNRNPD	12
BP	GO:0010565	regulation of cellular ketone metabolic process	29/1297	166/17653	1.05881e-05	0.000167197	0.000138469	DLD/DLAT/PDHB/ACADVL/PSMA7/CAV1/COMT/CPT1A/PSMB6/PSME2/ERLIN1/EIF6/PSMC5/PSMC4/PARK7/PSMA6/PDHA1/PSMA2/ANXA1/PSMB7/PSMA1/PSMC6/PSMB2/PSMD4/PSMD8/PSMC3/PSMB4/PSMA4/PSMA5	29
BP	GO:1905897	regulation of response to endoplasmic reticulum stress	18/1297	78/17653	1.06037e-05	0.000167197	0.000138469	HSPA5/HYOU1/HSPA1A/AGR2/RACK1/BCAP31/ERP29/OPA1/DNAJC3/CAV1/PARK7/TXNDC12/PTPN1/UBQLN2/TMEM33/ERLEC1/DERL2/OS9	18
BP	GO:0090114	COPII-coated vesicle budding	17/1297	71/17653	1.09925e-05	0.000172538	0.000142892	RAB1B/TMED10/RAB1A/VAPA/NSF/NAPA/LMAN1/SEC22B/CD59/SAR1A/MCFD2/TMED2/SEC31A/VAPB/SEC24C/SCFD1/SEC24B	17
BP	GO:2000573	positive regulation of DNA biosynthetic process	16/1297	64/17653	1.10102e-05	0.000172538	0.000142892	HSP90AB1/HNRNPA2B1/CCT7/HSP90AA1/HNRNPA1/XRCC5/CCT4/CCT2/CCT3/TCP1/DDX39B/CCT6A/CCT8/PTGES3/CCT5/HNRNPD	16
BP	GO:0048026	positive regulation of mRNA splicing, via spliceosome	8/1297	17/17653	1.108e-05	0.0001731	0.000143357	HSPA8/THRAP3/DAZAP1/SF3B4/RBMX/PRPF19/SNRNP70/TRA2B	8
BP	GO:1990778	protein localization to cell periphery	40/1297	266/17653	1.15761e-05	0.000180296	0.000149317	FLNA/CLTC/ANXA2/KRT18/ITGB1/BSG/EZR/AGR2/RACK1/RDX/RAB10/RHOG/VAMP3/NSF/GOLPH3/JUP/CAV1/SQSTM1/S100A10/ITGA3/TMED2/STX7/CSNK2A1/ACSL3/RAB8A/VAMP8/RAB34/CNPY4/CDH2/ATP1B3/RER1/F11R/EPB41L2/ATP1B1/DLG1/PICALM/SLC9A3R1/VAMP7/LIN7A/MYADM	40
BP	GO:1901605	alpha-amino acid metabolic process	35/1297	220/17653	1.17381e-05	0.000182262	0.000150945	P4HB/OAT/P4HA1/DLD/ACAT1/PLOD2/PRDX4/SHMT2/GLUD1/ERO1A/OGDH/MTHFD1/GOT2/PYCR1/DLST/HIBADH/ALDH18A1/MCCC2/COMT/PYCR2/ALDH4A1/GLS/PLOD1/PARK7/GMPS/CTPS1/IVD/HMGCL/GCSH/GCDH/SLC25A32/CRTAP/CPOX/GART/GFPT2	35
BP	GO:0031334	positive regulation of protein complex assembly	39/1297	257/17653	1.19532e-05	0.000185038	0.000153244	VCP/HSPA1A/HSPA1B/MSN/CTTN/FSCN1/ICAM1/RHOA/RPS3/MAPRE1/RHOC/RACK1/ACTR3/RHOG/PARP1/GSN/PFN1/PSMC5/PSMC4/CAND1/BID/ARPC2/ARPC4/BAIAP2/SUB1/SH3GLB1/RAC1/DCTN1/RPA2/EIF4G1/VASP/PSMC6/ARPC1B/ARPC5L/DLG1/PSMC3/C15orf62/ACTR2/ARPC5	39
BP	GO:1902369	negative regulation of RNA catabolic process	14/1297	51/17653	1.21799e-05	0.000187976	0.000155677	LRPPRC/PABPC1/YBX1/HNRNPU/SLIRP/SYNCRIP/IGF2BP1/TARDBP/HNRNPC/HNRNPA0/YBX3/LARP1/THRAP3/HNRNPD	14
BP	GO:0060249	anatomical structure homeostasis	53/1297	393/17653	1.2503e-05	0.000192379	0.000159324	ACTB/ALDOA/KRT1/HSP90AB1/PRDX1/HNRNPA2B1/FH/XRCC6/TFRC/CCT7/HNRNPU/RAB7A/HSP90AA1/HNRNPA1/XRCC5/HSPB1/CCT4/CCT2/CCT3/TCP1/TPP1/GNAS/CCT6A/B2M/CCT8/PARP1/ALB/HNRNPC/PTGES3/LPCAT1/CCT5/LAMP2/HIST1H4I/HIST1H4A/HIST1H4D/HIST1H4F/HIST1H4K/HIST1H4J/HIST1H4C/HIST1H4H/HIST1H4B/HIST1H4E/HIST1H4L/HIST2H4A/HIST4H4/HIST2H4B/HNRNPD/RAC1/GIGYF2/RPA2/UPF1/PCNA/PPP1R10	53
BP	GO:0045815	positive regulation of gene expression, epigenetic	18/1297	79/17653	1.28005e-05	0.000196019	0.000162338	ACTB/DDX21/H3F3A/H3F3B/HIST1H4I/HIST1H4A/HIST1H4D/HIST1H4F/HIST1H4K/HIST1H4J/HIST1H4C/HIST1H4H/HIST1H4B/HIST1H4E/HIST1H4L/HIST2H4A/HIST4H4/HIST2H4B	18
BP	GO:0031330	negative regulation of cellular catabolic process	36/1297	230/17653	1.28165e-05	0.000196019	0.000162338	LRPPRC/ANXA2/HSP90AB1/PABPC1/YBX1/HNRNPU/HMOX1/SLIRP/STAT3/RPL5/SYNCRIP/RPS7/IGF2BP1/CTSA/RPL23/TARDBP/HNRNPC/HNRNPA0/SEC22B/PARK7/YBX3/RPL11/LARP1/THRAP3/HNRNPD/SDCBP/EIF4G1/POLDIP2/ERLEC1/SNRNP70/DERL2/EIF4G2/SCFD1/GIPC1/PTK2/OS9	36
BP	GO:0032802	low-density lipoprotein particle receptor catabolic process	7/1297	13/17653	1.3154e-05	0.00019998	0.000165618	CLTC/ANXA2/AP2B1/APOE/AP2A2/CLTA/AP2A1	7
BP	GO:1904814	regulation of protein localization to chromosome, telomeric region	7/1297	13/17653	1.3154e-05	0.00019998	0.000165618	CCT7/CCT4/CCT2/TCP1/CCT6A/CCT8/CCT5	7
BP	GO:0000381	regulation of alternative mRNA splicing, via spliceosome	13/1297	45/17653	1.35395e-05	0.000205228	0.000169964	PTBP1/HNRNPU/HNRNPA1/HNRNPL/DDX17/SRSF6/THRAP3/SF3A1/DDX5/SRSF2/RBMX/RBM4/TRA2B	13
BP	GO:0032386	regulation of intracellular transport	53/1297	395/17653	1.4444e-05	0.000218288	0.000180781	ANXA2/HSP90AB1/MSN/EZR/ATP2A2/NUCB1/RUVBL1/HMOX1/SCP2/YWHAE/BCAP31/RDX/EHD1/DNM1L/TM9SF4/CDC42/SFN/JUP/NAPA/KHDRBS1/XPO1/GDI1/SNX3/ATP5IF1/PARK7/LAMP1/CHP1/EMD/SH3GLB1/TXN/FIS1/RANGAP1/UBE2L3/PTPN1/VAMP8/RBM4/MFF/REEP6/DYNC1H1/PSMB7/ERLEC1/RAB11B/DERL2/SCFD1/RAB21/PSMD8/SEC24B/TOMM7/VAMP7/PPP1R12A/OS9/PDCD5/CEP290	53
BP	GO:0006892	post-Golgi vesicle-mediated transport	20/1297	95/17653	1.51942e-05	0.000228947	0.000189608	KRT18/RACK1/RAB10/VAMP3/NSF/GOLPH3/SCAMP3/LAMP1/RAB14/SNAP23/ACSL3/SCAMP1/AP1G1/CORO7/VAMP8/RAB34/TGOLN2/SCFD1/AP2A1/VAMP7	20
BP	GO:0060147	regulation of posttranscriptional gene silencing	22/1297	111/17653	1.60094e-05	0.000239811	0.000198605	STAT3/RAN/H3F3A/H3F3B/HIST1H4I/HIST1H4A/HIST1H4D/HIST1H4F/HIST1H4K/HIST1H4J/HIST1H4C/HIST1H4H/HIST1H4B/HIST1H4E/HIST1H4L/HIST2H4A/HIST4H4/HIST2H4B/DDX5/EIF4G1/RANBP2/ADAR	22
BP	GO:0060966	regulation of gene silencing by RNA	22/1297	111/17653	1.60094e-05	0.000239811	0.000198605	STAT3/RAN/H3F3A/H3F3B/HIST1H4I/HIST1H4A/HIST1H4D/HIST1H4F/HIST1H4K/HIST1H4J/HIST1H4C/HIST1H4H/HIST1H4B/HIST1H4E/HIST1H4L/HIST2H4A/HIST4H4/HIST2H4B/DDX5/EIF4G1/RANBP2/ADAR	22
BP	GO:0010256	endomembrane system organization	56/1297	427/17653	1.63673e-05	0.000244453	0.00020245	MYOF/RTN4/RAB7A/YWHAZ/ATL3/ATP2A2/ZMPSTE24/TMED10/RAB10/RAB1A/VMP1/TMED4/TMED9/CDC42/GOLPH3/TARDBP/GSN/CAV1/RAB2A/LMAN1/NPLOC4/LMAN2/SNX3/AHNAK2/SURF4/SQSTM1/TICAM2/TOR1AIP1/TOR1AIP2/RTN3/TMED2/SEC31A/VAPB/EMD/TMED5/SEC61A1/STX6/BAIAP2/SH3GLB1/BANF1/DCTN1/TOR1A/SYNGR2/LAMTOR1/CCDC47/AGFG1/TMEM33/LMNA/RAB18/NECTIN2/RANBP2/TRIP11/TMEM43/PIK3C3/GORASP2/ARL6IP1	56
BP	GO:0006376	mRNA splice site selection	10/1297	28/17653	1.70437e-05	0.000253812	0.0002102	SRSF1/SF1/SRSF6/SRSF9/SF3A3/SF3A1/LUC7L3/SNRPC/RBMX/SRSF10	10
BP	GO:0045727	positive regulation of translation	23/1297	120/17653	1.83602e-05	0.00027262	0.000225777	EEF2/VIM/NPM1/PABPC1/EIF5A/C1QBP/RPS4X/RHOA/DDX3X/RPL5/DDX39B/DNAJC3/KHDRBS1/EIF6/RBM3/RPL26/RPS9/MRPS27/YBX3/LARP1/HNRNPD/COA3/TRMT10C	23
BP	GO:0046394	carboxylic acid biosynthetic process	55/1297	419/17653	1.89347e-05	0.000280333	0.000232164	PKM/CLTC/ENO1/ALDOA/GAPDH/OAT/PLOD2/PGK1/SHMT2/GLUD1/OGDH/LDHA/HSD17B4/MTHFD1/GOT2/FASN/PYCR1/SCP2/ALDOC/STAT3/TPI1/ACADVL/ALDH18A1/UGDH/NDUFAB1/HK1/PTGES3/SCD/PYCR2/PGAM1/ERLIN1/EIF6/GLS/PLOD1/ATP5IF1/PARK7/HACD3/PTGES2/PFKP/ACSL3/HSD17B12/MIF/FADS2/GART/GPI/ANXA1/MGST3/SUCLA2/DECR2/ABCD3/TECR/ACOT7/MCAT/AP2A1/RANBP2	55
BP	GO:0045070	positive regulation of viral genome replication	11/1297	34/17653	1.90438e-05	0.00028113	0.000232825	HSPA8/PABPC1/PPIA/PPIB/DDX3X/VAPA/HACD3/LARP1/VAPB/ADAR/STAU1	11
BP	GO:0018126	protein hydroxylation	9/1297	23/17653	1.92731e-05	0.000283694	0.000234948	P4HB/P4HA1/PLOD2/P4HA2/ASPH/P3H1/P3H2/PLOD1/CRTAP	9
BP	GO:0022406	membrane docking	30/1297	180/17653	1.94509e-05	0.000285485	0.000236432	TUBB/ESYT1/TUBB4B/MSN/EZR/RAB7A/HSP90AA1/ICAM1/YWHAG/MAPRE1/YWHAE/RAB10/ACTR1A/VAMP3/NSF/SNX3/CHP1/STX7/STX6/RAB8A/DCTN1/VAMP8/DYNC1H1/ESYT2/RALB/DCTN2/SCFD1/STX12/CEP290/CEP70	30
BP	GO:0016053	organic acid biosynthetic process	55/1297	420/17653	2.02717e-05	0.000296677	0.000245701	PKM/CLTC/ENO1/ALDOA/GAPDH/OAT/PLOD2/PGK1/SHMT2/GLUD1/OGDH/LDHA/HSD17B4/MTHFD1/GOT2/FASN/PYCR1/SCP2/ALDOC/STAT3/TPI1/ACADVL/ALDH18A1/UGDH/NDUFAB1/HK1/PTGES3/SCD/PYCR2/PGAM1/ERLIN1/EIF6/GLS/PLOD1/ATP5IF1/PARK7/HACD3/PTGES2/PFKP/ACSL3/HSD17B12/MIF/FADS2/GART/GPI/ANXA1/MGST3/SUCLA2/DECR2/ABCD3/TECR/ACOT7/MCAT/AP2A1/RANBP2	55
BP	GO:0006334	nucleosome assembly	26/1297	146/17653	2.10597e-05	0.000307327	0.00025452	NPM1/RUVBL1/SET/HIST1H1D/HIST1H1B/NAP1L1/H3F3A/H3F3B/HIST1H4I/HIST1H4A/HIST1H4D/HIST1H4F/HIST1H4K/HIST1H4J/HIST1H4C/HIST1H4H/HIST1H4B/HIST1H4E/HIST1H4L/HIST2H4A/HIST4H4/HIST2H4B/HIST2H2BF/NAP1L4/RBBP4/HP1BP3	26
BP	GO:0010821	regulation of mitochondrion organization	35/1297	226/17653	2.12146e-05	0.000308703	0.00025566	HSPA1A/STOML2/VDAC1/CTTN/YWHAZ/YWHAB/YWHAG/RUVBL1/YWHAQ/YWHAE/SLC25A5/OPA1/DNM1L/GOLPH3/SFN/YWHAH/FAM162A/ACAA2/ATP5IF1/SQSTM1/PARK7/BID/SH3GLB1/FIS1/UBE2L3/GBA/MFF/PSMB7/VAT1/LMNA/PSMD8/TOMM7/PPIF/PDCD5/PRELID1	35
BP	GO:0045185	maintenance of protein location	21/1297	105/17653	2.14594e-05	0.000311375	0.000257873	HSPA5/FLNA/PDIA3/EZR/HNRNPU/YWHAB/TLN1/FLNB/GOLPH3/JUP/HK1/GSN/CAV1/PARK7/DBN1/TXN/G3BP2/RANGAP1/RER1/SKP1/OS9	21
BP	GO:0031503	protein-containing complex localization	37/1297	245/17653	2.20918e-05	0.000319641	0.000264718	NPM1/HNRNPA2B1/EIF5A/EZR/RPSA/AP2B1/DDX39B/SRSF1/SRSF7/RAN/U2AF2/ALYREF/XPO1/RPS15/ABCE1/EIF6/SRSF6/DDX39A/SRSF9/U2AF1/SSB/SRSF3/STX7/SRRM1/SRSF2/RAB8A/SRSF10/AGFG1/UPF1/RALB/SARNP/EIF4E/DLG1/RANBP2/HIP1/TRIP11/MAGOHB	37
BP	GO:0031124	mRNA 3'-end processing	19/1297	90/17653	2.36423e-05	0.000340142	0.000281697	PABPC1/DDX39B/SRSF1/SRSF7/U2AF2/ALYREF/SRSF6/GRSF1/DDX39A/SRSF9/U2AF1/SRSF3/PNPT1/SRRM1/SRSF2/NUDT21/APP/SARNP/MAGOHB	19
BP	GO:0097006	regulation of plasma lipoprotein particle levels	19/1297	90/17653	2.36423e-05	0.000340142	0.000281697	CLTC/P4HB/ANXA2/HNRNPK/HDLBP/AP2B1/HMOX1/APOE/EHD1/CNPY2/AP2A2/ALB/NCEH1/CLTA/NPC2/ACSL3/LDLR/AP2A1/LRPAP1	19
BP	GO:0019081	viral translation	7/1297	14/17653	2.46359e-05	0.000353439	0.000292709	PTBP1/PCBP2/EIF3A/MCTS1/SSB/EIF3G/EIF3B	7
BP	GO:0075522	IRES-dependent viral translational initiation	6/1297	10/17653	2.52364e-05	0.000361036	0.000299001	PTBP1/PCBP2/EIF3A/MCTS1/SSB/EIF3B	6
BP	GO:0045089	positive regulation of innate immune response	48/1297	353/17653	2.55536e-05	0.00036455	0.000301911	HSPD1/HSP90B1/HSPA1A/HSPA1B/XRCC6/XRCC5/C1QBP/HMGB1/RPS19/MATR3/RPS27A/NRAS/PSMA7/CAV1/NPLOC4/PSMB6/PSME2/SFPQ/PSMC5/PSMC4/NONO/LAMP1/TICAM2/CTSB/PSMA6/UBE2N/PSMA2/AP1G1/LGMN/PSMB7/PSMA1/PSMC6/NECTIN2/PSMB2/WDFY1/SKP1/PSMD4/PSMD8/CNPY3/ERBIN/PSMC3/PSPC1/PSMB4/PSMA4/PSMA5/PIK3C3/DDX60/NOD1	48
BP	GO:0046165	alcohol biosynthetic process	25/1297	140/17653	2.8718e-05	0.000408549	0.00033835	G6PD/CES1/ACAT1/POR/NSDHL/FASN/APOE/DHCR7/RAN/CYB5R3/SCD/KPNB1/ERLIN1/ACAA2/PARK7/SPTLC1/EBP/ACAT2/CNBP/GBA/MSMO1/SPTLC2/CYP51A1/LBR/FDFT1	25
BP	GO:0070199	establishment of protein localization to chromosome	9/1297	24/17653	2.88312e-05	0.000408981	0.000338708	CCT7/CCT4/CCT2/TCP1/CCT6A/CCT8/RUVBL2/HIST1H1B/CCT5	9
BP	GO:0060964	regulation of gene silencing by miRNA	21/1297	107/17653	2.89089e-05	0.000408981	0.000338708	STAT3/RAN/H3F3A/H3F3B/HIST1H4I/HIST1H4A/HIST1H4D/HIST1H4F/HIST1H4K/HIST1H4J/HIST1H4C/HIST1H4H/HIST1H4B/HIST1H4E/HIST1H4L/HIST2H4A/HIST4H4/HIST2H4B/DDX5/EIF4G1/RANBP2	21
BP	GO:0002183	cytoplasmic translational initiation	8/1297	19/17653	3.01544e-05	0.000424244	0.000351348	EIF4B/EIF4H/EIF2S3/RPL13A/EIF3A/MCTS1/RBM4/EIF4G1	8
BP	GO:0030150	protein import into mitochondrial matrix	8/1297	19/17653	3.01544e-05	0.000424244	0.000351348	TIMM50/TOMM40/GRPEL1/TOMM22/TIMM17A/TIMM44/TOMM20/TOMM7	8
BP	GO:0000726	non-recombinational repair	18/1297	84/17653	3.1124e-05	0.00043668	0.000361647	XRCC6/XRCC5/UBE2N/HIST1H4I/HIST1H4A/HIST1H4D/HIST1H4F/HIST1H4K/HIST1H4J/HIST1H4C/HIST1H4H/HIST1H4B/HIST1H4E/HIST1H4L/HIST2H4A/HIST4H4/HIST2H4B/PRPF19	18
BP	GO:2000116	regulation of cysteine-type endopeptidase activity	37/1297	249/17653	3.16905e-05	0.000443406	0.000367218	HSPD1/VCP/AIFM1/POR/PRDX5/PRDX3/HMGB1/RHOA/RPS3/DDX3X/YWHAE/ASPH/CD44/RACK1/BCAP31/HSPE1/DIABLO/SFN/GSN/FAM162A/CAST/PARK7/CYCS/BID/CSNK2A1/FIS1/GPI/LAMTOR5/TNFRSF10B/BCL2L13/ARL6IP5/HIP1/USP47/NDUFA13/PDCD5/ARL6IP1/NOD1	37
BP	GO:0043489	RNA stabilization	12/1297	42/17653	3.27625e-05	0.00045715	0.0003786	PABPC1/YBX1/HNRNPU/SYNCRIP/IGF2BP1/TARDBP/HNRNPC/HNRNPA0/YBX3/LARP1/THRAP3/HNRNPD	12
BP	GO:0006094	gluconeogenesis	17/1297	77/17653	3.41929e-05	0.000475805	0.00039405	ENO1/ALDOA/GAPDH/MDH2/PGK1/SLC25A13/GOT2/ALDOC/TPI1/GPD2/PGAM1/SLC25A12/SLC25A10/SLC25A1/MDH1/GPI/SLC25A11	17
BP	GO:0000086	G2/M transition of mitotic cell cycle	37/1297	250/17653	3.46216e-05	0.000480457	0.000397902	TUBB/TUBB4B/HSP90AA1/YWHAG/MAPRE1/YWHAE/RPS27A/ACTR1A/PSMA7/KHDRBS1/PSMB6/PSME2/PSMC5/PSMC4/PSMA6/PSMA2/RAB8A/DCTN1/DYNC1H1/PSMB7/APP/PSMA1/PSMC6/PSMB2/DCTN2/SKP1/PSMD4/PSMD8/PSMC3/PSMB4/PSMA4/PSMA5/PPP1R12A/USP47/CEP290/CEP70/FANCI	37
BP	GO:1904358	positive regulation of telomere maintenance via telomere lengthening	11/1297	36/17653	3.48854e-05	0.000482803	0.000399845	HNRNPA2B1/CCT7/HNRNPA1/XRCC5/CCT4/CCT2/CCT3/TCP1/CCT6A/CCT8/CCT5	11
BP	GO:1902905	positive regulation of supramolecular fiber organization	31/1297	195/17653	3.68371e-05	0.000508432	0.000421071	HSPA1A/HSPA1B/CTTN/ICAM1/RHOA/CFL1/RPS3/MAPRE1/APOE/ACTR3/RHOG/CDC42/GSN/PFN1/DSTN/S100A10/ARPC2/ARPC4/BAIAP2/RAC1/DCTN1/COLGALT1/APP/VASP/ARPC1B/ARPC5L/DLG1/PXN/C15orf62/ACTR2/ARPC5	31
BP	GO:1902750	negative regulation of cell cycle G2/M phase transition	21/1297	109/17653	3.85968e-05	0.000531279	0.000439992	RPS27A/PSMA7/PSMB6/PSME2/PSMC5/PSMC4/PSMA6/PSMA2/PSMB7/PSMA1/PSMC6/PSMB2/SKP1/PSMD4/PSMD8/PSMC3/PSMB4/PSMA4/PSMA5/USP47/FANCI	21
BP	GO:0010506	regulation of autophagy	43/1297	310/17653	4.13027e-05	0.000566993	0.000469569	EEF1A1/GAPDH/EEF1A2/VDAC1/PSAP/CTTN/HMGB1/HSPB1/RUVBL1/HMOX1/RAB1B/DNM1L/CTSA/GNAI3/ATP6V0D1/SEC22B/ATP5IF1/MTDH/PARK7/SPTLC1/LARP1/SH3GLB1/CAPNS1/RAB8A/UBQLN2/GBA/SPTLC2/LAMTOR1/LAMTOR5/EIF4G1/POLDIP2/RALB/SNRNP70/EIF4G2/SCFD1/ATP6V1A/LAMTOR3/TOMM7/PTK2/NOD1/SNX5/USP10/CALCOCO2	43
BP	GO:0032527	protein exit from endoplasmic reticulum	12/1297	43/17653	4.24294e-05	0.000578282	0.000478919	HSP90B1/VCP/BCAP31/TM9SF4/NPLOC4/FAF2/HM13/SEC61B/ERLEC1/DERL2/DERL1/OS9	12
BP	GO:1903573	negative regulation of response to endoplasmic reticulum stress	12/1297	43/17653	4.24294e-05	0.000578282	0.000478919	HSPA5/HYOU1/HSPA1A/RACK1/OPA1/DNAJC3/PARK7/TXNDC12/PTPN1/ERLEC1/DERL2/OS9	12
BP	GO:0045862	positive regulation of proteolysis	47/1297	350/17653	4.24657e-05	0.000578282	0.000478919	HSPD1/VCP/ENO1/HSPA1A/HSPA1B/AIFM1/PHB/HMGB1/RHOA/RPS3/DDX3X/APOE/ASPH/RACK1/BCAP31/STAT3/HSPE1/DIABLO/GSN/CAV1/TIMM17A/FAM162A/PSME2/PSMC5/PSMC4/ATP5IF1/CYCS/BID/SUMO2/FIS1/UBQLN2/GBA/TNFRSF10B/APP/DDRGK1/PSMC6/BCL2L13/KARS/ARL6IP5/PICALM/PSMC3/HIP1/PTK2/NDUFA13/PDCD5/NOD1/PRELID1	47
BP	GO:0070200	establishment of protein localization to telomere	7/1297	15/17653	4.32599e-05	0.000587527	0.000486575	CCT7/CCT4/CCT2/TCP1/CCT6A/CCT8/CCT5	7
BP	GO:0008202	steroid metabolic process	43/1297	311/17653	4.46054e-05	0.000604189	0.000500374	G6PD/CAT/CES1/ACAT1/POR/HSD17B4/NSDHL/ATP1A1/HDLBP/FASN/SCP2/APOE/ACADVL/DHCR7/RAN/CYB5R3/YWHAH/COMT/SF1/SCD/APOL2/HINT2/KPNB1/ERLIN1/ACAA2/NPC2/ACAA1/EBP/SUMO2/HSD17B12/ACAT2/FDXR/CNBP/LDLR/MSMO1/LGMN/LAMTOR1/CYP51A1/LBR/APP/FDFT1/UBE2I/HSD17B11	43
BP	GO:0051131	chaperone-mediated protein complex assembly	8/1297	20/17653	4.7025e-05	0.000635274	0.000526118	HSPD1/HSPA1A/HSP90AB1/HSP90AA1/LONP1/CCT2/PTGES3/HSPA4	8
BP	GO:0010833	telomere maintenance via telomere lengthening	17/1297	79/17653	4.84352e-05	0.000650872	0.000539036	HSP90AB1/HNRNPA2B1/CCT7/HNRNPU/HSP90AA1/HNRNPA1/XRCC5/CCT4/CCT2/CCT3/TCP1/CCT6A/CCT8/PARP1/HNRNPC/PTGES3/CCT5	17
BP	GO:0032204	regulation of telomere maintenance	17/1297	79/17653	4.84352e-05	0.000650872	0.000539036	HNRNPA2B1/CCT7/HNRNPU/HNRNPA1/XRCC5/CCT4/CCT2/CCT3/TCP1/CCT6A/CCT8/PARP1/HNRNPC/CCT5/HNRNPD/UPF1/PPP1R10	17
BP	GO:0010950	positive regulation of endopeptidase activity	28/1297	171/17653	5.03815e-05	0.000675245	0.000559221	HSPD1/VCP/AIFM1/HMGB1/RHOA/RPS3/DDX3X/ASPH/RACK1/BCAP31/STAT3/HSPE1/DIABLO/GSN/FAM162A/PSME2/CYCS/BID/FIS1/TNFRSF10B/BCL2L13/ARL6IP5/PICALM/HIP1/NDUFA13/PDCD5/NOD1/PRELID1	28
BP	GO:0009896	positive regulation of catabolic process	51/1297	393/17653	5.09259e-05	0.000679372	0.000562639	VCP/HSPA1A/HSPA1B/MSN/PABPC1/EZR/RAB7A/HSP90AA1/HMOX1/APOE/RACK1/BCAP31/RDX/NSF/CAV1/GNAI3/CPT1A/PSMC5/SEC22B/LPCAT1/HNRNPR/PSMC4/ATP5IF1/MTDH/PARK7/CD81/SPTLC1/LARP1/KHSRP/PNPT1/CSNK2A1/SUMO2/SH3GLB1/HNRNPD/LDLR/PTPN1/UBQLN2/GBA/SPTLC2/GIGYF2/UPF1/DDRGK1/PSMC6/RALB/PSMC3/TOMM7/PTK2/NDUFA13/RNF128/NOD1/CALCOCO2	51
BP	GO:0006406	mRNA export from nucleus	21/1297	111/17653	5.10896e-05	0.000679372	0.000562639	HNRNPA2B1/EIF5A/DDX39B/SRSF1/SRSF7/U2AF2/ALYREF/SRSF6/DDX39A/SRSF9/U2AF1/SRSF3/SRRM1/SRSF2/SRSF10/AGFG1/UPF1/SARNP/EIF4E/RANBP2/MAGOHB	21
BP	GO:0071427	mRNA-containing ribonucleoprotein complex export from nucleus	21/1297	111/17653	5.10896e-05	0.000679372	0.000562639	HNRNPA2B1/EIF5A/DDX39B/SRSF1/SRSF7/U2AF2/ALYREF/SRSF6/DDX39A/SRSF9/U2AF1/SRSF3/SRRM1/SRSF2/SRSF10/AGFG1/UPF1/SARNP/EIF4E/RANBP2/MAGOHB	21
BP	GO:0030099	myeloid cell differentiation	51/1297	394/17653	5.44323e-05	0.000721937	0.00059789	HSPA9/ANXA2/G6PD/HSPA1A/HSPA1B/ACTN1/TFRC/PRDX3/PABPC4/LGALS3/SFXN1/STAT3/RPS19/GNAS/B2M/RPS14/CDC42/PARP1/RPS6/CD109/EIF6/NME1/ATP5IF1/H3F3A/H3F3B/HIST1H4I/HIST1H4A/HIST1H4D/HIST1H4F/HIST1H4K/HIST1H4J/HIST1H4C/HIST1H4H/HIST1H4B/HIST1H4E/HIST1H4L/HIST2H4A/HIST4H4/HIST2H4B/LYAR/P4HTM/WDR61/DPY30/MT1G/APP/PIR/FAM213A/HMGB3/DNASE2/ADAR/OSTM1	51
BP	GO:0043112	receptor metabolic process	28/1297	172/17653	5.60416e-05	0.000739663	0.000612571	CLTC/ANXA2/HNRNPK/ITGB1/TFRC/EZR/AP2B1/ITGAV/APOE/CNPY2/VAMP3/NSF/AP2A2/CAV1/CLTA/CD81/SH3GLB1/PTPN1/UBQLN2/ECE1/LGMN/LAMTOR1/SDCBP/RAB11B/ATXN2/AP2A1/PICALM/LRPAP1	28
BP	GO:1905330	regulation of morphogenesis of an epithelium	29/1297	181/17653	5.60593e-05	0.000739663	0.000612571	CLTC/PHB2/RHOA/AP2B1/RPS27A/PSMA7/CDC42/AP2A2/PFN1/PSMB6/PSME2/PSMC5/PSMC4/PSMA6/PSMA2/RAC1/PSMB7/PSMA1/PSMC6/PSMB2/AP2A1/PSMD4/PSMD8/SEC24B/PSMC3/PSMB4/PSMA4/PSMA5/PTK7	29
BP	GO:0090263	positive regulation of canonical Wnt signaling pathway	24/1297	137/17653	5.66888e-05	0.000746036	0.000617848	VCP/DDX3X/RUVBL1/RPS27A/PSMA7/JUP/CAV1/PSMB6/PSME2/PSMC5/PSMC4/PSMA6/PSMA2/PSMB7/PSMA1/PSMC6/PSMB2/PSMD4/PSMD8/PSMC3/PSMB4/PSMA4/PSMA5/USP47	24
BP	GO:0019319	hexose biosynthetic process	17/1297	80/17653	5.73505e-05	0.0007528	0.00062345	ENO1/ALDOA/GAPDH/MDH2/PGK1/SLC25A13/GOT2/ALDOC/TPI1/GPD2/PGAM1/SLC25A12/SLC25A10/SLC25A1/MDH1/GPI/SLC25A11	17
BP	GO:0032206	positive regulation of telomere maintenance	13/1297	51/17653	5.83715e-05	0.000760323	0.00062968	HNRNPA2B1/CCT7/HNRNPA1/XRCC5/CCT4/CCT2/CCT3/TCP1/CCT6A/CCT8/CCT5/HNRNPD/PPP1R10	13
BP	GO:0035384	thioester biosynthetic process	13/1297	51/17653	5.83715e-05	0.000760323	0.00062968	DLD/ACAT1/FASN/DLAT/PDHB/SCD/PDHA1/ACSL3/HSD17B12/GCDH/SLC25A1/MPC1/TECR	13
BP	GO:0071616	acyl-CoA biosynthetic process	13/1297	51/17653	5.83715e-05	0.000760323	0.00062968	DLD/ACAT1/FASN/DLAT/PDHB/SCD/PDHA1/ACSL3/HSD17B12/GCDH/SLC25A1/MPC1/TECR	13
BP	GO:0045638	negative regulation of myeloid cell differentiation	18/1297	88/17653	5.9791e-05	0.000776826	0.000643348	HSPA9/NME1/HIST1H4I/HIST1H4A/HIST1H4D/HIST1H4F/HIST1H4K/HIST1H4J/HIST1H4C/HIST1H4H/HIST1H4B/HIST1H4E/HIST1H4L/HIST2H4A/HIST4H4/HIST2H4B/WDR61/HMGB3	18
BP	GO:0043280	positive regulation of cysteine-type endopeptidase activity involved in apoptotic process	23/1297	129/17653	6.05654e-05	0.000784885	0.000650022	HSPD1/VCP/AIFM1/HMGB1/RHOA/RPS3/DDX3X/RACK1/BCAP31/HSPE1/DIABLO/GSN/FAM162A/CYCS/BID/FIS1/TNFRSF10B/BCL2L13/ARL6IP5/HIP1/NDUFA13/PDCD5/NOD1	23
BP	GO:0031331	positive regulation of cellular catabolic process	45/1297	335/17653	6.0834e-05	0.000785983	0.000650931	VCP/HSPA1A/HSPA1B/MSN/PABPC1/EZR/HSP90AA1/HMOX1/APOE/RACK1/BCAP31/RDX/CAV1/GNAI3/CPT1A/PSMC5/HNRNPR/PSMC4/ATP5IF1/MTDH/PARK7/CD81/SPTLC1/LARP1/KHSRP/PNPT1/SUMO2/SH3GLB1/HNRNPD/LDLR/PTPN1/UBQLN2/GBA/SPTLC2/GIGYF2/UPF1/DDRGK1/PSMC6/RALB/PSMC3/TOMM7/PTK2/RNF128/NOD1/CALCOCO2	45
BP	GO:1901998	toxin transport	11/1297	38/17653	6.09588e-05	0.000785983	0.000650931	HSPA5/CCT7/CCT4/CCT2/CCT3/TCP1/CCT8/COPB2/COPZ1/CCT5/SCFD1	11
BP	GO:0030832	regulation of actin filament length	29/1297	182/17653	6.20978e-05	0.000798647	0.000661419	CTTN/ICAM1/RHOA/CFL1/RDX/ACTR3/RHOG/GSN/PFN1/DSTN/EPS8L2/CAPZB/CAPZA1/ARPC2/CAPZA2/ARPC4/BAIAP2/SPTAN1/RAC1/VASP/ARPC1B/ARPC5L/DLG1/LIMA1/C15orf62/ACTR2/ARPC5/MYADM/NEB	29
BP	GO:1903364	positive regulation of cellular protein catabolic process	24/1297	138/17653	6.39283e-05	0.000820118	0.000679201	VCP/HSPA1A/HSPA1B/MSN/EZR/HSP90AA1/APOE/RACK1/BCAP31/RDX/CAV1/PSMC5/PSMC4/ATP5IF1/CD81/SUMO2/LDLR/UBQLN2/GBA/DDRGK1/PSMC6/PSMC3/PTK2/RNF128	24
BP	GO:0044839	cell cycle G2/M phase transition	38/1297	267/17653	6.50093e-05	0.000831891	0.000688951	NPM1/TUBB/TUBB4B/HSP90AA1/YWHAG/MAPRE1/YWHAE/RPS27A/ACTR1A/PSMA7/KHDRBS1/PSMB6/PSME2/PSMC5/PSMC4/PSMA6/PSMA2/RAB8A/DCTN1/DYNC1H1/PSMB7/APP/PSMA1/PSMC6/PSMB2/DCTN2/SKP1/PSMD4/PSMD8/PSMC3/PSMB4/PSMA4/PSMA5/PPP1R12A/USP47/CEP290/CEP70/FANCI	38
BP	GO:0030100	regulation of endocytosis	34/1297	229/17653	6.63291e-05	0.000846652	0.000701176	ACTN4/CALR/ANXA2/HNRNPK/HMGB1/AP2B1/ITGAV/APOE/LGALS3/RACK1/MFGE8/RAB5C/DNM1L/B2M/CAV1/LMAN2/SNX3/RAB14/SERPINE1/CD151/LYAR/LDLR/PTPN1/UBQLN2/RAC1/TOR1A/SDCBP/ATXN2/AP2A1/RAB21/PICALM/HIP1/LRPAP1/STON2	34
BP	GO:0032273	positive regulation of protein polymerization	23/1297	130/17653	6.85572e-05	0.000872905	0.000722918	HSPA1A/HSPA1B/CTTN/ICAM1/RHOA/RPS3/MAPRE1/ACTR3/RHOG/GSN/PFN1/ARPC2/ARPC4/BAIAP2/RAC1/DCTN1/VASP/ARPC1B/ARPC5L/DLG1/C15orf62/ACTR2/ARPC5	23
BP	GO:0018279	protein N-linked glycosylation via asparagine	12/1297	45/17653	6.93558e-05	0.00087868	0.0007277	VCP/RPN1/RPN2/DDOST/UGGT1/LMAN1/MCFD2/DAD1/STT3A/DPM1/OSTC/DPM3	12
BP	GO:1902373	negative regulation of mRNA catabolic process	12/1297	45/17653	6.93558e-05	0.00087868	0.0007277	PABPC1/YBX1/HNRNPU/SYNCRIP/IGF2BP1/TARDBP/HNRNPC/HNRNPA0/YBX3/LARP1/THRAP3/HNRNPD	12
BP	GO:0009083	branched-chain amino acid catabolic process	8/1297	21/17653	7.10825e-05	0.00089832	0.000743966	HSD17B10/DLD/ACAT1/HIBADH/MCCC2/ACADSB/IVD/HMGCL	8
BP	GO:0007015	actin filament organization	50/1297	388/17653	7.19213e-05	0.000901343	0.000746469	ACTN4/FLNA/HSP90B1/ALDOA/ACTN1/CTTN/ACTC1/EZR/FSCN1/ICAM1/RHOA/CFL1/RHOC/RDX/ACTR3/MARCKS/CTNNA1/RHOG/CDC42/GSN/PFN1/CAP1/DSTN/S100A10/DBN1/EPS8L2/RHOB/CAPZB/CAPZA1/ARPC2/CAPZA2/ARPC4/BAIAP2/CORO7/SPTAN1/RAC1/ITGB5/VASP/PLS3/TPM3/ARPC1B/ARPC5L/DLG1/PXN/LIMA1/HIP1/C15orf62/ACTR2/ARPC5/MYADM	50
BP	GO:0033539	fatty acid beta-oxidation using acyl-CoA dehydrogenase	7/1297	16/17653	7.20295e-05	0.000901343	0.000746469	ETFA/ETFB/ACADM/ACADVL/ACOX1/IVD/GCDH	7
BP	GO:0071428	rRNA-containing ribonucleoprotein complex export from nucleus	7/1297	16/17653	7.20295e-05	0.000901343	0.000746469	NPM1/RPSA/RAN/XPO1/RPS15/ABCE1/EIF6	7
BP	GO:0071786	endoplasmic reticulum tubular network organization	7/1297	16/17653	7.20295e-05	0.000901343	0.000746469	RTN4/ATL3/RAB10/RTN3/TMEM33/RAB18/ARL6IP1	7
BP	GO:0009435	NAD biosynthetic process	13/1297	52/17653	7.26456e-05	0.000906823	0.000751008	PKM/ENO1/ALDOA/GAPDH/PGK1/ALDOC/TPI1/HK1/PGAM1/PFKP/NAXE/GPI/NUDT12	13
BP	GO:0051188	cofactor biosynthetic process	41/1297	298/17653	7.43199e-05	0.000925455	0.000766439	PKM/ENO1/ALDOA/GAPDH/IDH2/DLD/ACAT1/PGK1/OGDH/LDHA/MTHFD1/FASN/ALDOC/DLAT/STAT3/TPI1/PDHB/HK1/SCD/PGAM1/EIF6/NDUFA9/ATP5IF1/PDHA1/PFKP/ACSL3/HSD17B12/FDXR/GCDH/TMEM14C/SLC25A1/CPOX/NAXE/GART/GPI/MPC1/SUCLA2/TECR/ACOT7/RANBP2/NUDT12	41
BP	GO:0032482	Rab protein signal transduction	16/1297	74/17653	7.54224e-05	0.000936893	0.000775911	RAB7A/RAB1B/RAB5C/RAB10/RAB1A/RAB2A/GDI1/RAB14/RAB6A/RAB8A/RAB23/RAB34/RAB18/RAB11B/RAB21/RAB32	16
BP	GO:0034504	protein localization to nucleus	36/1297	250/17653	7.84557e-05	0.000972202	0.000805153	PDIA3/CALR/HSP90AB1/PHB2/CCT7/HNRNPU/CCT4/CCT2/CCT3/STAT3/TCP1/CCT6A/CCT8/RPL23/RAN/JUP/XPO1/KPNB1/PARK7/RPL11/TOR1AIP1/TOR1AIP2/CHP1/CCT5/KPNA1/KPNA2/RANBP1/TXN/RANGAP1/KPNA4/TOR1A/SEC61B/LMNA/SKP1/RANBP2/PPP1R10	36
BP	GO:0032801	receptor catabolic process	10/1297	33/17653	8.56664e-05	0.00105898	0.00087702	CLTC/ANXA2/AP2B1/APOE/AP2A2/CLTA/SH3GLB1/PTPN1/LGMN/AP2A1	10
BP	GO:0042180	cellular ketone metabolic process	34/1297	232/17653	8.62901e-05	0.00106411	0.000881266	DLD/GOT2/DLAT/PDHB/ACADVL/PSMA7/GPD2/CAV1/COMT/CPT1A/PSMB6/PSME2/ERLIN1/EIF6/PSMC5/NDUFA9/PSMC4/PARK7/PSMA6/PDHA1/PSMA2/FDXR/GPI/ANXA1/PSMB7/PSMA1/PSMC6/PSMB2/PSMD4/PSMD8/PSMC3/PSMB4/PSMA4/PSMA5	34
BP	GO:0019079	viral genome replication	21/1297	115/17653	8.73528e-05	0.00107269	0.000888374	VCP/HSPA8/PABPC1/PPIA/PPIB/DDX3X/PCBP2/PCBP1/VAPA/CDC42/TRIM28/HACD3/LARP1/VAPB/DDX5/CTBP1/BANF1/LAMTOR5/ADAR/ILF3/STAU1	21
BP	GO:1904356	regulation of telomere maintenance via telomere lengthening	14/1297	60/17653	8.75893e-05	0.00107269	0.000888374	HNRNPA2B1/CCT7/HNRNPU/HNRNPA1/XRCC5/CCT4/CCT2/CCT3/TCP1/CCT6A/CCT8/PARP1/HNRNPC/CCT5	14
BP	GO:0018196	peptidyl-asparagine modification	12/1297	46/17653	8.76181e-05	0.00107269	0.000888374	VCP/RPN1/RPN2/DDOST/UGGT1/LMAN1/MCFD2/DAD1/STT3A/DPM1/OSTC/DPM3	12
BP	GO:0006278	RNA-dependent DNA biosynthetic process	16/1297	75/17653	8.94235e-05	0.00109217	0.000904506	HSP90AB1/PPIA/CCT7/HNRNPU/HSP90AA1/HNRNPA1/XRCC5/CCT4/CCT2/CCT3/TCP1/CCT6A/CCT8/HNRNPC/PTGES3/CCT5	16
BP	GO:0034329	cell junction assembly	33/1297	223/17653	9.00308e-05	0.00109695	0.000908469	ACTN4/FLNA/ACTB/ACTN1/CTTN/FSCN1/RAP1B/RHOA/TLN1/RHOC/VCL/KRT5/CTNNA1/IQGAP1/VMP1/CDC42/JUP/CAV1/MTDH/S100A10/CAPZA1/CORO1C/LAMC1/CD151/RAC1/TJP1/PLEC/CDH2/VASP/F11R/ITGA5/DLG1/PTK2	33
BP	GO:0006694	steroid biosynthetic process	29/1297	186/17653	9.25532e-05	0.001125	0.000931694	G6PD/CES1/ACAT1/POR/HSD17B4/NSDHL/ATP1A1/FASN/SCP2/APOE/DHCR7/RAN/CYB5R3/SF1/SCD/HINT2/KPNB1/ERLIN1/ACAA2/EBP/HSD17B12/ACAT2/FDXR/CNBP/MSMO1/CYP51A1/LBR/FDFT1/HSD17B11	29
BP	GO:0019471	4-hydroxyproline metabolic process	6/1297	12/17653	9.76318e-05	0.0011839	0.000980478	P4HB/P4HA1/PRDX4/ERO1A/GOT2/ALDH4A1	6
BP	GO:0060968	regulation of gene silencing	23/1297	133/17653	9.8481e-05	0.00118704	0.000983073	STAT3/TRIM28/RAN/H3F3A/H3F3B/HIST1H4I/HIST1H4A/HIST1H4D/HIST1H4F/HIST1H4K/HIST1H4J/HIST1H4C/HIST1H4H/HIST1H4B/HIST1H4E/HIST1H4L/HIST2H4A/HIST4H4/HIST2H4B/DDX5/EIF4G1/RANBP2/ADAR	23
BP	GO:0006901	vesicle coating	15/1297	68/17653	9.85894e-05	0.00118704	0.000983073	RAB1B/TMED10/RAB1A/TMED9/NSF/NAPA/LMAN1/SEC22B/CD59/MCFD2/TMED2/SEC31A/SEC24C/SCFD1/SEC24B	15
BP	GO:0007004	telomere maintenance via telomerase	15/1297	68/17653	9.85894e-05	0.00118704	0.000983073	HSP90AB1/CCT7/HNRNPU/HSP90AA1/HNRNPA1/XRCC5/CCT4/CCT2/CCT3/TCP1/CCT6A/CCT8/HNRNPC/PTGES3/CCT5	15
BP	GO:1901028	regulation of mitochondrial outer membrane permeabilization involved in apoptotic signaling pathway	12/1297	47/17653	0.000109868	0.00131971	0.00109295	HSPA1A/YWHAZ/YWHAB/YWHAG/YWHAQ/YWHAE/SLC25A5/SFN/YWHAH/ACAA2/ATP5IF1/BID	12
BP	GO:0032212	positive regulation of telomere maintenance via telomerase	10/1297	34/17653	0.000113426	0.00135924	0.00112569	CCT7/HNRNPA1/XRCC5/CCT4/CCT2/CCT3/TCP1/CCT6A/CCT8/CCT5	10
BP	GO:2000278	regulation of DNA biosynthetic process	19/1297	101/17653	0.000123887	0.00148112	0.00122663	HSP90AB1/HNRNPA2B1/CCT7/HNRNPU/HSP90AA1/HNRNPA1/XRCC5/CCT4/CCT2/CCT3/TCP1/DDX39B/CCT6A/CCT8/HNRNPC/PTGES3/CCT5/HNRNPD/FAM129B	19
BP	GO:0030219	megakaryocyte differentiation	18/1297	93/17653	0.000126844	0.00151292	0.00125296	EIF6/H3F3A/H3F3B/HIST1H4I/HIST1H4A/HIST1H4D/HIST1H4F/HIST1H4K/HIST1H4J/HIST1H4C/HIST1H4H/HIST1H4B/HIST1H4E/HIST1H4L/HIST2H4A/HIST4H4/HIST2H4B/DPY30	18
BP	GO:0044242	cellular lipid catabolic process	31/1297	208/17653	0.000127153	0.00151306	0.00125308	ECH1/HADHA/ETFA/ECHS1/ACAT1/HADHB/HSD17B4/SCP2/APOE/ETFB/ECI1/ACADM/ACADVL/ACOX1/NDUFAB1/CPT1A/DECR1/HADH/ACAA2/ACAD9/IVD/ACAA1/HEXB/ACAT2/GCDH/LDLR/GBA/DECR2/ABCD3/MCAT/CPT2	31
BP	GO:2001056	positive regulation of cysteine-type endopeptidase activity	24/1297	144/17653	0.000127511	0.00151378	0.00125368	HSPD1/VCP/AIFM1/HMGB1/RHOA/RPS3/DDX3X/ASPH/RACK1/BCAP31/HSPE1/DIABLO/GSN/FAM162A/CYCS/BID/FIS1/TNFRSF10B/BCL2L13/ARL6IP5/HIP1/NDUFA13/PDCD5/NOD1	24
BP	GO:0051656	establishment of organelle localization	55/1297	450/17653	0.000134099	0.00158829	0.00131538	ACTN4/LRPPRC/NPM1/EZR/HNRNPU/YWHAZ/ATP2A2/HMOX1/ACTR3/RAB1B/OPA1/COPG1/TMED10/RAB1A/DNM1L/MAP4/TMED9/CDC42/NSF/RAN/NAPA/LMAN1/XPO1/KPNB1/RPS15/ABCE1/EIF6/SEC22B/CD59/LAMP1/MCFD2/RAB6A/TMED2/SEC31A/SNAP23/DCTN1/VAMP8/TOR1A/DYNC1H1/SEC24C/NECTIN2/RAB11B/DCTN2/DLG1/SCFD1/KIF2C/PEX14/AP3M1/SLC9A3R1/SEC24B/VAMP7/PTK2/ACTR2/LIN7A/TMEM230	55
BP	GO:0008064	regulation of actin polymerization or depolymerization	28/1297	181/17653	0.000139199	0.00164488	0.00136224	CTTN/ICAM1/RHOA/CFL1/RDX/ACTR3/RHOG/GSN/PFN1/DSTN/EPS8L2/CAPZB/CAPZA1/ARPC2/CAPZA2/ARPC4/BAIAP2/SPTAN1/RAC1/VASP/ARPC1B/ARPC5L/DLG1/LIMA1/C15orf62/ACTR2/ARPC5/MYADM	28
BP	GO:0032535	regulation of cellular component size	46/1297	358/17653	0.000147418	0.00173796	0.00143934	HSP90AB1/MSN/CTTN/EZR/RTN4/ICAM1/RHOA/CFL1/APOE/RDX/ACTR3/RHOG/PPP1CA/GSN/PFN1/GDI1/DSTN/EPS8L2/CAPZB/CAPZA1/ARPC2/CAPZA2/ARPC4/BAIAP2/SEMA4B/SPTAN1/RAC1/CRABP2/L1CAM/LAMTOR5/VASP/ARPC1B/DPYSL2/HP1BP3/ARPC5L/DLG1/LIMA1/RAB21/PICALM/SLC9A3R1/C15orf62/SLC12A7/ACTR2/ARPC5/MYADM/NEB	46
BP	GO:0031497	chromatin assembly	26/1297	164/17653	0.000158596	0.0018627	0.00154264	NPM1/RUVBL1/SET/HIST1H1D/HIST1H1B/NAP1L1/H3F3A/H3F3B/HIST1H4I/HIST1H4A/HIST1H4D/HIST1H4F/HIST1H4K/HIST1H4J/HIST1H4C/HIST1H4H/HIST1H4B/HIST1H4E/HIST1H4L/HIST2H4A/HIST4H4/HIST2H4B/HIST2H2BF/NAP1L4/RBBP4/HP1BP3	26
BP	GO:0016482	cytosolic transport	24/1297	146/17653	0.00015873	0.0018627	0.00154264	CLTC/CES1/MSN/EZR/RAB7A/RDX/VAMP3/WASHC2A/SNX3/LAMP1/RAB14/RAB6A/STX6/VPS29/AP1G1/CORO7/DCTN1/SRSF10/TGOLN2/AP2A1/RAB21/PIK3C3/ACTR2/SNX5	24
BP	GO:2001244	positive regulation of intrinsic apoptotic signaling pathway	13/1297	56/17653	0.00016417	0.00192211	0.00159184	RPS3/RACK1/BCAP31/RPS7/DNM1L/CAV1/SFPQ/RPL26/PARK7/BID/FIS1/PRKRA/SLC9A3R1	13
BP	GO:0032271	regulation of protein polymerization	31/1297	211/17653	0.000165781	0.00193652	0.00160378	HSPA1A/HSPA1B/CTTN/VDAC2/ICAM1/RHOA/RPS3/MAPRE1/RDX/ACTR3/RHOG/GSN/PFN1/EPS8L2/CAPZB/CAPZA1/ARPC2/CAPZA2/ARPC4/BAIAP2/SPTAN1/RAC1/DCTN1/VASP/ARPC1B/ARPC5L/DLG1/C15orf62/ACTR2/ARPC5/MYADM	31
BP	GO:0034063	stress granule assembly	6/1297	13/17653	0.000170041	0.00198087	0.00164051	DDX3X/RPS23/ATXN2L/G3BP2/DYNC1H1/ATXN2	6
BP	GO:0046902	regulation of mitochondrial membrane permeability	16/1297	79/17653	0.000170745	0.00198087	0.00164051	HSPA1A/YWHAZ/YWHAB/YWHAG/SLC25A6/YWHAQ/YWHAE/SLC25A5/STAT3/SFN/YWHAH/ACAA2/ATP5IF1/BID/CNP/PPIF	16
BP	GO:0051289	protein homotetramerization	16/1297	79/17653	0.000170745	0.00198087	0.00164051	PKM/ALDOA/HSD17B10/CAT/SHMT2/DNM1L/SOD2/DECR1/HM13/GLS/CRYZ/ATP5IF1/ST13/NAXE/VASP/PEX14	16
BP	GO:0090559	regulation of membrane permeability	17/1297	87/17653	0.000171449	0.00198453	0.00164353	HSPA1A/YWHAZ/YWHAB/YWHAG/SLC25A6/YWHAQ/YWHAE/SLC25A5/STAT3/SFN/YWHAH/ACAA2/ATP5IF1/BID/CNP/F11R/PPIF	17
BP	GO:0048268	clathrin coat assembly	7/1297	18/17653	0.000175808	0.00203036	0.00168149	CLTC/AP2B1/CLTA/CLINT1/CLTB/PICALM/HIP1	7
BP	GO:0051260	protein homooligomerization	42/1297	320/17653	0.000177006	0.00203709	0.00168706	PKM/VCP/ALDOA/HSD17B10/CAT/ACAT1/SHMT2/LONP1/ATL3/HMOX1/APOE/RHOC/RACK1/MARCKS/EHD1/DNM1L/SOD2/CAV1/CPT1A/DECR1/HM13/GLS/CRYZ/ATP5IF1/BID/PNPT1/LETM1/ST13/FIS1/GBA/MIF/TOR1A/NAXE/RBMX/MFF/VASP/CLPP/PEX14/DERL1/CD3D/KCNA4/MLKL	42
BP	GO:0034330	cell junction organization	37/1297	270/17653	0.00017719	0.00203709	0.00168706	ACTN4/FLNA/ACTB/ACTN1/CTTN/FSCN1/RAP1B/RHOA/TLN1/RHOC/VCL/RDX/KRT5/CTNNA1/IQGAP1/CTNND1/VMP1/CDC42/JUP/CAV1/MTDH/S100A10/CAPZA1/CORO1C/LAMC1/CD151/RAC1/TJP1/PLEC/CDH2/DSP/VASP/F11R/NECTIN2/ITGA5/DLG1/PTK2	37
BP	GO:0048207	vesicle targeting, rough ER to cis-Golgi	14/1297	64/17653	0.000183289	0.00209303	0.00173339	RAB1B/TMED10/RAB1A/NSF/NAPA/LMAN1/SEC22B/CD59/MCFD2/TMED2/SEC31A/SEC24C/SCFD1/SEC24B	14
BP	GO:0048208	COPII vesicle coating	14/1297	64/17653	0.000183289	0.00209303	0.00173339	RAB1B/TMED10/RAB1A/NSF/NAPA/LMAN1/SEC22B/CD59/MCFD2/TMED2/SEC31A/SEC24C/SCFD1/SEC24B	14
BP	GO:0051881	regulation of mitochondrial membrane potential	14/1297	64/17653	0.000183289	0.00209303	0.00173339	VCP/STOML2/PRDX3/PPA2/PYCR1/RACK1/PARP1/NDUFS1/CLIC1/ATP5IF1/PARK7/BID/ARL6IP5/PRELID1	14
BP	GO:0008154	actin polymerization or depolymerization	30/1297	203/17653	0.000188814	0.0021513	0.00178165	CTTN/ICAM1/RHOA/CFL1/RDX/ACTR3/RHOG/GSN/PFN1/CAP1/DSTN/EPS8L2/CAPZB/CAPZA1/ARPC2/CAPZA2/ARPC4/BAIAP2/CORO7/SPTAN1/RAC1/VASP/ARPC1B/ARPC5L/DLG1/LIMA1/C15orf62/ACTR2/ARPC5/MYADM	30
BP	GO:0048199	vesicle targeting, to, from or within Golgi	15/1297	72/17653	0.000194566	0.00221188	0.00183183	RAB1B/TMED10/RAB1A/TMED9/NSF/NAPA/LMAN1/SEC22B/CD59/MCFD2/TMED2/SEC31A/SEC24C/SCFD1/SEC24B	15
BP	GO:0002262	myeloid cell homeostasis	23/1297	139/17653	0.000195045	0.00221239	0.00183225	HSPA9/G6PD/HSPA1A/HSPA1B/PRDX1/HMGB1/MTHFD1/HMOX1/SFXN1/RPS17/STAT3/RPS19/B2M/RPS14/RPS6/ATP5IF1/RPS24/LYAR/P4HTM/GPI/ANXA1/DNASE2/ADAR	23
BP	GO:0001836	release of cytochrome c from mitochondria	13/1297	57/17653	0.000198546	0.00224212	0.00185686	TIMM50/OPA1/DNM1L/SOD2/SFN/FAM162A/BID/FIS1/MFF/LMNA/PPIF/PDCD5/PRELID1	13
BP	GO:1903902	positive regulation of viral life cycle	13/1297	57/17653	0.000198546	0.00224212	0.00185686	P4HB/HSPA8/PABPC1/PPIA/PPIB/DDX3X/LGALS1/VAPA/HACD3/LARP1/VAPB/ADAR/STAU1	13
BP	GO:0065004	protein-DNA complex assembly	35/1297	252/17653	0.000201581	0.00227136	0.00188108	NPM1/HMGB1/RUVBL1/SET/RPS27A/HIST1H1D/PARP1/HIST1H1B/PSMC5/NAP1L1/PSMC4/CAND1/H3F3A/H3F3B/HIST1H4I/HIST1H4A/HIST1H4D/HIST1H4F/HIST1H4K/HIST1H4J/HIST1H4C/HIST1H4H/HIST1H4B/HIST1H4E/HIST1H4L/HIST2H4A/HIST4H4/HIST2H4B/HIST2H2BF/NAP1L4/RBBP4/RPA2/PSMC6/HP1BP3/PSMC3	35
BP	GO:0071103	DNA conformation change	39/1297	292/17653	0.000206715	0.00232407	0.00192473	NPM1/AIFM1/HNRNPA2B1/XRCC6/XRCC5/HMGB1/DDX3X/RUVBL1/SET/RPS27A/DDX1/HIST1H1D/RUVBL2/PARP1/HIST1H1B/G3BP1/NAP1L1/H3F3A/H3F3B/HIST1H4I/HIST1H4A/HIST1H4D/HIST1H4F/HIST1H4K/HIST1H4J/HIST1H4C/HIST1H4H/HIST1H4B/HIST1H4E/HIST1H4L/HIST2H4A/HIST4H4/HIST2H4B/HIST2H2BF/NAP1L4/RBBP4/ANXA1/HMGB3/HP1BP3	39
BP	GO:0006851	mitochondrial calcium ion transmembrane transport	8/1297	24/17653	0.000210586	0.00235629	0.00195142	STOML2/PHB/VDAC1/PHB2/OPA1/LETM1/PMPCB/PMPCA	8
BP	GO:0009081	branched-chain amino acid metabolic process	8/1297	24/17653	0.000210586	0.00235629	0.00195142	HSD17B10/DLD/ACAT1/HIBADH/MCCC2/ACADSB/IVD/HMGCL	8
BP	GO:0032069	regulation of nuclease activity	9/1297	30/17653	0.000210969	0.00235629	0.00195142	HSPA5/HSPA1A/NPM1/HMGB1/RPS3/ABCE1/VAPB/PTPN1/PCNA	9
BP	GO:0045088	regulation of innate immune response	52/1297	427/17653	0.000221018	0.00246312	0.0020399	HSPD1/HSP90B1/HSPA1A/HSPA1B/HSP90AB1/XRCC6/XRCC5/C1QBP/HMGB1/RPS19/MATR3/RPS27A/NRAS/PSMA7/CAV1/NPLOC4/PSMB6/ABCE1/PSME2/SFPQ/PSMC5/PSMC4/NONO/LAMP1/TICAM2/CTSB/PSMA6/UBE2N/PSMA2/AP1G1/PTPN1/LGMN/PSMB7/PSMA1/PSMC6/NECTIN2/PSMB2/WDFY1/SKP1/PSMD4/PSMD8/CNPY3/ERBIN/PSMC3/PSPC1/PSMB4/PSMA4/ADAR/PSMA5/PIK3C3/DDX60/NOD1	52
BP	GO:0002758	innate immune response-activating signal transduction	38/1297	283/17653	0.000222228	0.00247119	0.00204658	HSPD1/HSP90B1/HSPA1A/HSPA1B/C1QBP/HMGB1/RPS27A/NRAS/PSMA7/CAV1/NPLOC4/PSMB6/PSME2/PSMC5/PSMC4/TICAM2/CTSB/PSMA6/UBE2N/PSMA2/LGMN/PSMB7/PSMA1/PSMC6/PSMB2/WDFY1/SKP1/PSMD4/PSMD8/CNPY3/ERBIN/PSMC3/PSMB4/PSMA4/PSMA5/PIK3C3/DDX60/NOD1	38
BP	GO:0002223	stimulatory C-type lectin receptor signaling pathway	21/1297	123/17653	0.000233543	0.00258572	0.00214143	RPS27A/NRAS/PSMA7/PSMB6/PSME2/PSMC5/PSMC4/PSMA6/UBE2N/PSMA2/PSMB7/PSMA1/PSMC6/PSMB2/SKP1/PSMD4/PSMD8/PSMC3/PSMB4/PSMA4/PSMA5	21
BP	GO:0046939	nucleotide phosphorylation	21/1297	123/17653	0.000233543	0.00258572	0.00214143	PKM/ENO1/ALDOA/GAPDH/PGK1/OGDH/LDHA/AK2/ALDOC/STAT3/TPI1/HK1/PGAM1/NME2/EIF6/NME1/NME3/PFKP/GPI/RANBP2/AK4	21
BP	GO:0000462	maturation of SSU-rRNA from tricistronic rRNA transcript (SSU-rRNA, 5.8S rRNA, LSU-rRNA)	10/1297	37/17653	0.000246058	0.0027125	0.00224643	RPSA/RPS8/RPS19/RPS14/RPS16/RPS24/MRPS9/RPS21/MRPS11/EMG1	10
BP	GO:0006739	NADP metabolic process	10/1297	37/17653	0.000246058	0.0027125	0.00224643	G6PD/TKT/IDH2/ME2/TPI1/NNT/PGAM1/PGD/NAXE/NUDT12	10
BP	GO:0034101	erythrocyte homeostasis	20/1297	115/17653	0.000252852	0.00278137	0.00230346	HSPA9/G6PD/HSPA1A/HSPA1B/PRDX1/HMOX1/SFXN1/RPS17/STAT3/RPS19/B2M/RPS14/RPS6/ATP5IF1/RPS24/LYAR/P4HTM/GPI/DNASE2/ADAR	20
BP	GO:0006984	ER-nucleus signaling pathway	11/1297	44/17653	0.000258281	0.00283497	0.00234785	HSPA5/HSP90B1/CALR/ATP2A2/AGR2/ERLIN1/EIF2S1/TMCO1/PTPN1/CCDC47/TMEM33	11
BP	GO:0006103	2-oxoglutarate metabolic process	7/1297	19/17653	0.000260772	0.00285615	0.00236539	IDH2/DLD/OGDH/GOT2/DLST/MRPS36/L2HGDH	7
BP	GO:0038093	Fc receptor signaling pathway	34/1297	246/17653	0.000270863	0.00296031	0.00245165	ACTB/HSP90AB1/HSP90AA1/ACTR3/RPS27A/NRAS/PSMA7/CDC42/PSMB6/PSME2/PSMC5/PSMC4/PSMA6/ARPC2/UBE2N/ARPC4/PSMA2/BAIAP2/RAC1/PSMB7/PSMA1/PSMC6/ARPC1B/PSMB2/SKP1/PSMD4/PSMD8/PSMC3/PSMB4/PSMA4/PSMA5/PTK2/ACTR2/ARPC5	34
BP	GO:0051495	positive regulation of cytoskeleton organization	31/1297	217/17653	0.000275832	0.00300816	0.00249128	HSPA1A/HSPA1B/CTTN/ICAM1/RHOA/CFL1/RPS3/MAPRE1/ACTR3/RHOG/CDC42/GSN/PFN1/DSTN/S100A10/ARPC2/ARPC4/RANBP1/BAIAP2/RAC1/DCTN1/DYNC1H1/VASP/ARPC1B/ARPC5L/DLG1/PXN/RANBP2/C15orf62/ACTR2/ARPC5	31
BP	GO:0000054	ribosomal subunit export from nucleus	6/1297	14/17653	0.000279095	0.00301151	0.00249406	NPM1/RAN/XPO1/RPS15/ABCE1/EIF6	6
BP	GO:0007039	protein catabolic process in the vacuole	6/1297	14/17653	0.000279095	0.00301151	0.00249406	CD81/LAMP2/CCDC115/LDLR/GBA/RNF128	6
BP	GO:0009113	purine nucleobase biosynthetic process	6/1297	14/17653	0.000279095	0.00301151	0.00249406	MTHFD1/PAICS/PRPS1/GMPS/GART/APRT	6
BP	GO:0019511	peptidyl-proline hydroxylation	6/1297	14/17653	0.000279095	0.00301151	0.00249406	P4HB/P4HA1/P4HA2/P3H1/P3H2/CRTAP	6
BP	GO:0033750	ribosome localization	6/1297	14/17653	0.000279095	0.00301151	0.00249406	NPM1/RAN/XPO1/RPS15/ABCE1/EIF6	6
BP	GO:0071347	cellular response to interleukin-1	26/1297	170/17653	0.000285211	0.00307099	0.00254332	ICAM1/RPS27A/PSMA7/PSMB6/PSME2/PSMC5/PSMC4/SQSTM1/PSMA6/UBE2N/PSMA2/RBMX/PSMB7/UPF1/PSMA1/PSMC6/PSMB2/SKP1/PSMD4/PSMD8/PSMC3/PSMB4/PSMA4/PSMA5/NOD1/USP10	26
BP	GO:0099132	ATP hydrolysis coupled cation transmembrane transport	13/1297	59/17653	0.000286092	0.00307398	0.0025458	ATP5F1B/ATP5F1A/ATP5PB/ATP2A2/ATP1A1/ATP5PO/ATP5PD/ATP5F1C/ATP5F1D/ATP6V0D1/ATP5MG/ATP5F1E/ATP6V1A	13
BP	GO:0062012	regulation of small molecule metabolic process	57/1297	485/17653	0.000286716	0.0030742	0.00254598	CLTC/VCP/ENO1/DLD/POR/RHOA/FASN/APOE/RACK1/DLAT/STAT3/GNAI2/ME2/PDHB/ACADVL/DNM1L/PSMA7/PPP1CA/PARP1/DHCR7/RAN/CAV1/GNAI3/CAP1/COMT/SCD/PGAM1/KPNB1/CPT1A/PSMB6/PSME2/ERLIN1/EIF6/PSMC5/PSMC4/ATP5IF1/PARK7/PSMA6/PDHA1/PSMA2/LDLR/CYP51A1/ANXA1/PSMB7/PSMA1/PSMC6/FDFT1/PSMB2/AP2A1/PSMD4/PSMD8/RANBP2/PSMC3/PPIF/PSMB4/PSMA4/PSMA5	57
BP	GO:0006006	glucose metabolic process	28/1297	189/17653	0.000291985	0.00312412	0.00258731	PKM/ENO1/ALDOA/G6PD/GAPDH/MDH2/PGK1/SLC25A13/GOT2/ALDOC/DLAT/TPI1/PDHB/GPD2/PPP1CA/HK1/PGAM1/CPT1A/SLC25A12/SLC25A10/PDHA1/PFKP/SLC25A1/MDH1/AIMP1/GPI/RANBP2/SLC25A11	28
BP	GO:0009132	nucleoside diphosphate metabolic process	23/1297	143/17653	0.000299017	0.00319264	0.00264407	PKM/ENO1/ALDOA/GAPDH/PGK1/OGDH/LDHA/AK2/ALDOC/STAT3/TPI1/HK1/PGAM1/NME2/EIF6/NME1/NME3/PFKP/GPI/DLG1/NUDT16/RANBP2/AK4	23
BP	GO:0030177	positive regulation of Wnt signaling pathway	26/1297	171/17653	0.000313347	0.00333866	0.00276499	VCP/DDX3X/RUVBL1/RPS27A/PSMA7/JUP/CAV1/PSMB6/PSME2/PSMC5/PSMC4/PSMA6/PSMA2/CSNK2A1/ATP6AP2/PSMB7/PSMA1/PSMC6/PSMB2/PSMD4/PSMD8/PSMC3/PSMB4/PSMA4/PSMA5/USP47	26
BP	GO:0006165	nucleoside diphosphate phosphorylation	20/1297	117/17653	0.000320267	0.00340526	0.00282015	PKM/ENO1/ALDOA/GAPDH/PGK1/OGDH/LDHA/ALDOC/STAT3/TPI1/HK1/PGAM1/NME2/EIF6/NME1/NME3/PFKP/GPI/RANBP2/AK4	20
BP	GO:0030833	regulation of actin filament polymerization	25/1297	162/17653	0.000321749	0.00341389	0.00282729	CTTN/ICAM1/RHOA/RDX/ACTR3/RHOG/GSN/PFN1/EPS8L2/CAPZB/CAPZA1/ARPC2/CAPZA2/ARPC4/BAIAP2/SPTAN1/RAC1/VASP/ARPC1B/ARPC5L/DLG1/C15orf62/ACTR2/ARPC5/MYADM	25
BP	GO:0016050	vesicle organization	49/1297	402/17653	0.000324477	0.00343567	0.00284534	CALR/ANXA2/RAB7A/RAB1B/TMED10/RAB1A/TMED9/VAPA/VAMP3/NSF/GOLPH3/CAV1/NAPA/LMAN1/GNAI3/SNX3/SEC22B/CD59/SQSTM1/SAR1A/RAB14/S100A10/MCFD2/TMED2/SEC31A/VAPB/SNAP23/STX7/STX6/AP1G1/RAB8A/VAMP8/LAMTOR1/RAB34/TAPBP/AGFG1/SDCBP/ANXA1/SEC24C/NECTIN2/SCFD1/TAP1/PICALM/SEC24B/RAB32/STX12/VAMP7/PIK3C3/SNX5	49
BP	GO:0031349	positive regulation of defense response	55/1297	466/17653	0.000327319	0.00344843	0.0028559	HSPD1/HSP90B1/HSPA1A/HSPA1B/XRCC6/XRCC5/C1QBP/HMGB1/SLC25A6/RPS19/MATR3/RPS27A/NRAS/PSMA7/CAV1/NPLOC4/PSMB6/PSME2/SFPQ/PSMC5/PSMC4/NONO/PARK7/LAMP1/TICAM2/CTSB/PSMA6/SERPINE1/UBE2N/PSMA2/LDLR/AP1G1/VAMP8/LGMN/PSMB7/PSMA1/PSMC6/NECTIN2/PSMB2/KARS/WDFY1/SKP1/PSMD4/PSMD8/CNPY3/ERBIN/PSMC3/PSPC1/PSMB4/PSMA4/VAMP7/PSMA5/PIK3C3/DDX60/NOD1	55
BP	GO:0030838	positive regulation of actin filament polymerization	18/1297	100/17653	0.000327397	0.00344843	0.0028559	CTTN/ICAM1/RHOA/ACTR3/RHOG/GSN/PFN1/ARPC2/ARPC4/BAIAP2/RAC1/VASP/ARPC1B/ARPC5L/DLG1/C15orf62/ACTR2/ARPC5	18
BP	GO:0002220	innate immune response activating cell surface receptor signaling pathway	21/1297	126/17653	0.00032839	0.00344843	0.0028559	RPS27A/NRAS/PSMA7/PSMB6/PSME2/PSMC5/PSMC4/PSMA6/UBE2N/PSMA2/PSMB7/PSMA1/PSMC6/PSMB2/SKP1/PSMD4/PSMD8/PSMC3/PSMB4/PSMA4/PSMA5	21
BP	GO:0044106	cellular amine metabolic process	21/1297	126/17653	0.00032839	0.00344843	0.0028559	PSMA7/COMT/PSMB6/PSME2/PSMC5/PSMC4/PARK7/PSMA6/PSMA2/CHDH/GCDH/PSMB7/PSMA1/PSMC6/PSMB2/PSMD4/PSMD8/PSMC3/PSMB4/PSMA4/PSMA5	21
BP	GO:0043161	proteasome-mediated ubiquitin-dependent protein catabolic process	49/1297	403/17653	0.00034377	0.00360251	0.00298351	HSPA5/HSP90B1/VCP/HSPA1A/HSPA1B/HSP90AB1/PCBP2/RACK1/BCAP31/RPS27A/PSMA7/CAV1/NPLOC4/FAF2/PSMB6/TRIM25/PSME2/ERLIN1/PSMC5/PSMC4/PARK7/RPL11/PSMA6/PSMA2/SUMO2/UBQLN2/GBA/UBXN4/CCDC47/SEC61B/BUB3/SDCBP/PSMB7/PSMA1/DDRGK1/PSMC6/ERLEC1/PSMB2/DERL2/SKP1/PSMD4/PSMD8/GIPC1/PSMC3/PSMB4/PSMA4/DERL1/PSMA5/OS9	49
BP	GO:0006353	DNA-templated transcription, termination	19/1297	109/17653	0.000346616	0.00362488	0.00300203	CAVIN1/DDX39B/SRSF1/SRSF7/U2AF2/ALYREF/SRSF6/SNRPE/DDX39A/SRSF9/U2AF1/SRSF3/SRRM1/SRSF2/NUDT21/SARNP/MAGOHB/SNRPB/SNRPD3	19
BP	GO:0046039	GTP metabolic process	9/1297	32/17653	0.00036185	0.00377644	0.00312755	RHOA/OPA1/RAN/GNAI3/NME2/NME1/NME3/RAB23/AK4	9
BP	GO:0032210	regulation of telomere maintenance via telomerase	12/1297	53/17653	0.000372203	0.00386864	0.00320391	CCT7/HNRNPU/HNRNPA1/XRCC5/CCT4/CCT2/CCT3/TCP1/CCT6A/CCT8/HNRNPC/CCT5	12
BP	GO:0090181	regulation of cholesterol metabolic process	12/1297	53/17653	0.000372203	0.00386864	0.00320391	POR/FASN/APOE/ACADVL/DHCR7/RAN/SCD/KPNB1/ERLIN1/LDLR/CYP51A1/FDFT1	12
BP	GO:0033209	tumor necrosis factor-mediated signaling pathway	26/1297	173/17653	0.000377062	0.00391116	0.00323912	HSPA1A/HSPA1B/KRT8/KRT18/RACK1/RPS27A/PSMA7/PSMB6/PSME2/PSMC5/PSMC4/PSMA6/PSMA2/GSTP1/TNFRSF10B/PSMB7/PSMA1/PSMC6/PSMB2/KARS/PSMD4/PSMD8/PSMC3/PSMB4/PSMA4/PSMA5	26
BP	GO:0051170	import into nucleus	25/1297	164/17653	0.000389242	0.00402929	0.00333696	PDIA3/HSP90AB1/PHB2/HNRNPA1/STAT3/RPL23/RAN/JUP/KPNB1/SNRPD1/SNRPE/CHP1/KPNA1/KPNA2/RANBP1/HTATIP2/TXN/SNRPD2/KPNA4/SEC61B/RAB18/RANBP2/SNRPB/SNRPD3/PPP1R10	25
BP	GO:0000413	protein peptidyl-prolyl isomerization	10/1297	39/17653	0.00039246	0.00403797	0.00334415	PPIA/PPIB/FKBP10/FKBP2/FKBP8/FKBP3/PIN4/FKBP9/RANBP2/PPIF	10
BP	GO:0007339	binding of sperm to zona pellucida	10/1297	39/17653	0.00039246	0.00403797	0.00334415	ALDOA/CCT7/VDAC2/CCT4/CCT2/CCT3/TCP1/CCT8/CCT5/UBAP2L	10
BP	GO:0072583	clathrin-dependent endocytosis	10/1297	39/17653	0.00039246	0.00403797	0.00334415	CLTC/CANX/AP2B1/AP2A2/CLTA/UBQLN2/CLTB/AP2A1/PICALM/HIP1	10
BP	GO:0045732	positive regulation of protein catabolic process	30/1297	212/17653	0.000404394	0.00415237	0.00343889	VCP/HSPA1A/HSPA1B/MSN/EZR/RAB7A/HSP90AA1/APOE/RACK1/BCAP31/RDX/NSF/CAV1/PSMC5/SEC22B/LPCAT1/PSMC4/ATP5IF1/CD81/CSNK2A1/SUMO2/LDLR/UBQLN2/GBA/DDRGK1/PSMC6/PSMC3/PTK2/NDUFA13/RNF128	30
BP	GO:0002576	platelet degranulation	21/1297	128/17653	0.000408955	0.00419076	0.00347069	ACTN4/FLNA/ALDOA/ACTN1/PSAP/TAGLN2/TLN1/VCL/ALB/CD109/SERPINE1/LAMP2/TMX3/APLP2/CHID1/ANXA5/OLA1/LGALS3BP/APP/FAM3C/SCCPDH	21
BP	GO:0043903	regulation of symbiosis, encompassing mutualism through parasitism	31/1297	222/17653	0.000412919	0.00422288	0.00349728	P4HB/HSPA8/ANXA2/GAPDH/PABPC1/PPIA/RAB7A/PPIB/CFL1/DDX3X/LGALS1/ITGAV/APOE/VAPA/TRIM28/TARDBP/GSN/CAV1/TRIM25/SNX3/SQSTM1/HACD3/LARP1/VAPB/DDX5/BANF1/NECTIN2/PSMC3/ADAR/ILF3/STAU1	31
BP	GO:0045898	regulation of RNA polymerase II transcriptional preinitiation complex assembly	6/1297	15/17653	0.000436319	0.00445325	0.00368807	HMGB1/PSMC5/PSMC4/CAND1/PSMC6/PSMC3	6
BP	GO:1904375	regulation of protein localization to cell periphery	17/1297	94/17653	0.0004481	0.00456434	0.00378007	CLTC/ITGB1/EZR/AGR2/RACK1/RHOG/SQSTM1/ITGA3/STX7/CSNK2A1/ACSL3/VAMP8/CNPY4/RER1/EPB41L2/DLG1/PICALM	17
BP	GO:0043001	Golgi to plasma membrane protein transport	9/1297	33/17653	0.000465419	0.0047313	0.00391834	KRT18/RACK1/RAB10/VAMP3/NSF/GOLPH3/ACSL3/RAB34/VAMP7	9
BP	GO:1903076	regulation of protein localization to plasma membrane	16/1297	86/17653	0.000470637	0.00477481	0.00395438	CLTC/ITGB1/EZR/AGR2/RACK1/RHOG/SQSTM1/ITGA3/STX7/CSNK2A1/ACSL3/VAMP8/CNPY4/RER1/DLG1/PICALM	16
BP	GO:0035337	fatty-acyl-CoA metabolic process	10/1297	40/17653	0.000489215	0.00495342	0.0041023	ACAT1/HSD17B4/FASN/SCD/ACSL3/HSD17B12/GCDH/SLC25A1/TECR/ACOT7	10
BP	GO:0030041	actin filament polymerization	26/1297	176/17653	0.000494019	0.00498225	0.00412618	CTTN/ICAM1/RHOA/RDX/ACTR3/RHOG/GSN/PFN1/EPS8L2/CAPZB/CAPZA1/ARPC2/CAPZA2/ARPC4/BAIAP2/CORO7/SPTAN1/RAC1/VASP/ARPC1B/ARPC5L/DLG1/C15orf62/ACTR2/ARPC5/MYADM	26
BP	GO:0034728	nucleosome organization	26/1297	176/17653	0.000494019	0.00498225	0.00412618	NPM1/RUVBL1/SET/HIST1H1D/HIST1H1B/NAP1L1/H3F3A/H3F3B/HIST1H4I/HIST1H4A/HIST1H4D/HIST1H4F/HIST1H4K/HIST1H4J/HIST1H4C/HIST1H4H/HIST1H4B/HIST1H4E/HIST1H4L/HIST2H4A/HIST4H4/HIST2H4B/HIST2H2BF/NAP1L4/RBBP4/HP1BP3	26
BP	GO:1902903	regulation of supramolecular fiber organization	42/1297	336/17653	0.000501816	0.00505089	0.00418302	HSPA8/HSPA1A/HSPA1B/CTTN/ICAM1/RHOA/CFL1/RPS3/MAPRE1/APOE/RDX/ACTR3/RHOG/CDC42/GSN/PFN1/DSTN/PARK7/S100A10/EPS8L2/CAPZB/CAPZA1/ARPC2/CAPZA2/ARPC4/BAIAP2/LDLR/SPTAN1/RAC1/DCTN1/COLGALT1/APP/VASP/ARPC1B/ARPC5L/DLG1/PXN/LIMA1/C15orf62/ACTR2/ARPC5/MYADM	42
BP	GO:0010498	proteasomal protein catabolic process	53/1297	453/17653	0.000513553	0.00515883	0.00427241	HSPA5/HSP90B1/VCP/HSPA1A/HSPA1B/HSP90AB1/PCBP2/RACK1/BCAP31/UGGT1/RPS27A/PSMA7/CAV1/NPLOC4/FAF2/PSMB6/TRIM25/PSME2/ERLIN1/HM13/PSMC5/PSMC4/PARK7/RPL11/PSMA6/PSMA2/SUMO2/UBQLN2/GBA/TOR1A/UBXN4/CCDC47/SEC61B/BUB3/SDCBP/PSMB7/PRPF19/PSMA1/DDRGK1/PSMC6/ERLEC1/PSMB2/DERL2/SKP1/PSMD4/PSMD8/GIPC1/PSMC3/PSMB4/PSMA4/DERL1/PSMA5/OS9	53
BP	GO:0035459	cargo loading into vesicle	8/1297	27/17653	0.000521365	0.00521672	0.00432036	TMED10/RAB1A/SAR1A/TMED2/SEC31A/SEC24C/PICALM/SEC24B	8
BP	GO:0070198	protein localization to chromosome, telomeric region	8/1297	27/17653	0.000521365	0.00521672	0.00432036	CCT7/XRCC5/CCT4/CCT2/TCP1/CCT6A/CCT8/CCT5	8
BP	GO:0097345	mitochondrial outer membrane permeabilization	12/1297	55/17653	0.000534043	0.0053331	0.00441674	HSPA1A/YWHAZ/YWHAB/YWHAG/YWHAQ/YWHAE/SLC25A5/SFN/YWHAH/ACAA2/ATP5IF1/BID	12
BP	GO:0006903	vesicle targeting	16/1297	87/17653	0.00053806	0.0053627	0.00444125	RAB1B/TMED10/RAB1A/TMED9/NSF/NAPA/LMAN1/SEC22B/CD59/MCFD2/TMED2/SEC31A/SNAP23/SEC24C/SCFD1/SEC24B	16
BP	GO:1902686	mitochondrial outer membrane permeabilization involved in programmed cell death	13/1297	63/17653	0.000562441	0.00558384	0.0046244	HSPA1A/YWHAZ/YWHAB/YWHAG/YWHAQ/YWHAE/SLC25A5/SFN/YWHAH/ACAA2/ATP5IF1/BID/PPIF	13
BP	GO:0010822	positive regulation of mitochondrion organization	25/1297	168/17653	0.000562441	0.00558384	0.0046244	STOML2/YWHAZ/YWHAB/YWHAG/RUVBL1/YWHAQ/YWHAE/OPA1/DNM1L/SFN/YWHAH/FAM162A/ATP5IF1/PARK7/BID/SH3GLB1/FIS1/UBE2L3/GBA/MFF/PSMB7/PSMD8/TOMM7/PPIF/PDCD5	25
BP	GO:0006891	intra-Golgi vesicle-mediated transport	9/1297	34/17653	0.000592137	0.00586722	0.00485909	COPG1/NSF/COPE/COPB2/NAPA/COPA/RAB6A/COPB1/COPZ1	9
BP	GO:0072595	maintenance of protein localization in organelle	10/1297	41/17653	0.000604938	0.00598243	0.0049545	HSPA5/PDIA3/HNRNPU/HK1/PARK7/TXN/RANGAP1/RER1/SKP1/OS9	10
BP	GO:0006399	tRNA metabolic process	27/1297	188/17653	0.000610156	0.00602233	0.00498754	HSD17B10/IARS2/PPA2/SARS2/DDX1/GARS/QARS/GRSF1/RTRAF/RTCB/SSB/FARSA/VARS/C2orf49/EPRS/AIMP1/TRMT1L/LRRC47/ELAC2/GATB/YARS/FARSB/KARS/PPA1/TRMT10C/NARS2/DARS	27
BP	GO:0006342	chromatin silencing	20/1297	123/17653	0.000625032	0.00615723	0.00509926	TRIM28/HIST1H2AE/HIST1H2AB/H3F3A/H3F3B/HIST1H4I/HIST1H4A/HIST1H4D/HIST1H4F/HIST1H4K/HIST1H4J/HIST1H4C/HIST1H4H/HIST1H4B/HIST1H4E/HIST1H4L/HIST2H4A/HIST4H4/HIST2H4B/DPY30	20
BP	GO:0060627	regulation of vesicle-mediated transport	56/1297	490/17653	0.000643547	0.00632739	0.00524018	ACTN4/CALR/ANXA2/HNRNPK/MSN/EZR/RAB7A/ATP2A2/HMGB1/AP2B1/HMOX1/ITGAV/APOE/LGALS3/RACK1/RDX/MFGE8/RAB5C/EHD1/RAB10/DNM1L/B2M/NSF/CAV1/NAPA/LMAN2/SNX3/LAMP1/RAB14/SERPINE1/ACSL3/CD151/LYAR/LDLR/AP1G1/RAB8A/PTPN1/UBQLN2/RAC1/VAMP8/RALA/TOR1A/SDCBP/ANXA1/RAB11B/RALB/ATXN2/SCFD1/AP2A1/RAB21/PICALM/SEC24B/HIP1/LRPAP1/STON2/VAMP7	56
BP	GO:0032075	positive regulation of nuclease activity	6/1297	16/17653	0.000654893	0.00642653	0.00532229	HSPA5/HSPA1A/RPS3/VAPB/PTPN1/PCNA	6
BP	GO:0034249	negative regulation of cellular amide metabolic process	53/1297	458/17653	0.000664837	0.00651157	0.00539272	CALR/GAPDH/NCL/HNRNPA2B1/RPS3/CAPRIN1/DDX3X/APOE/RACK1/STAT3/IGF2BP3/SYNCRIP/IGF2BP2/IGF2BP1/CTSA/RAN/EIF6/RPL13A/HNRNPR/H3F3A/H3F3B/SRP9/LARP1/KHSRP/HIST1H4I/HIST1H4A/HIST1H4D/HIST1H4F/HIST1H4K/HIST1H4J/HIST1H4C/HIST1H4H/HIST1H4B/HIST1H4E/HIST1H4L/HIST2H4A/HIST4H4/HIST2H4B/EIF2S1/DDX5/HNRNPD/EPRS/GIGYF2/PRKRA/RBM4/EIF4G1/UPF1/SNRNP70/EIF4E/RANBP2/MRPL44/ADAR/ILF3	53
BP	GO:0045806	negative regulation of endocytosis	11/1297	49/17653	0.000699091	0.00682082	0.00564883	HMGB1/LGALS3/RACK1/CAV1/SNX3/UBQLN2/RAC1/SDCBP/ATXN2/PICALM/LRPAP1	11
BP	GO:1900024	regulation of substrate adhesion-dependent cell spreading	11/1297	49/17653	0.000699091	0.00682082	0.00564883	ACTN4/FLNA/CALR/C1QBP/CDC42/S100A10/CORO1C/ARPC2/RAC1/PTK2/MYADM	11
BP	GO:2000027	regulation of organ morphogenesis	33/1297	249/17653	0.000704352	0.00685902	0.00568047	CLTC/PHB2/BASP1/POR/RHOA/AP2B1/RPS27A/PSMA7/CDC42/AP2A2/PFN1/PSMB6/PSME2/PSMC5/SRSF6/PSMC4/PSMA6/PSMA2/RAC1/PSMB7/PSMA1/PSMC6/PSMB2/GNG5/AP2A1/PSMD4/PSMD8/SEC24B/PSMC3/PSMB4/PSMA4/PSMA5/PTK7	33
BP	GO:0045540	regulation of cholesterol biosynthetic process	10/1297	42/17653	0.000742373	0.00721547	0.00597567	POR/FASN/APOE/DHCR7/RAN/SCD/KPNB1/ERLIN1/CYP51A1/FDFT1	10
BP	GO:0051204	protein insertion into mitochondrial membrane	9/1297	35/17653	0.000745731	0.0072343	0.00599126	YWHAZ/YWHAB/YWHAG/YWHAQ/YWHAE/TOMM22/SFN/YWHAH/BID	9
BP	GO:0051187	cofactor catabolic process	12/1297	57/17653	0.000751283	0.0072743	0.00602439	VCP/CAT/PRDX1/ACAT1/PRDX5/PRDX3/HMOX1/HMOX2/BLVRA/ACOT7/PRDX2/NUDT12	12
BP	GO:0051054	positive regulation of DNA metabolic process	30/1297	220/17653	0.000755467	0.00730093	0.00604645	CALR/STOML2/HSP90AB1/HNRNPA2B1/TFRC/CCT7/HSP90AA1/HNRNPA1/XRCC5/HMGB1/RPS3/CCT4/CCT2/CCT3/TCP1/CACYBP/DDX39B/CCT6A/CCT8/CDC42/TRIM28/PARP1/PTGES3/CCT5/UBE2N/HNRNPD/RAC1/NUDT16/PCNA/PPP1R10	30
BP	GO:1902115	regulation of organelle assembly	24/1297	162/17653	0.00076602	0.0073889	0.00611931	HSPA1A/HSPA1B/NPM1/MSN/EZR/HNRNPU/FSCN1/RHOA/RDX/RAB1B/MAP4/GSN/SEC22B/VDAC3/SEPT9/SH3GLB1/ATXN2L/UBQLN2/SDCBP/DYNC1H1/SEPT7/RALB/ATXN2/SCFD1	24
BP	GO:1903706	regulation of hemopoiesis	52/1297	450/17653	0.000768491	0.00739305	0.00612274	HSPA9/HSPA1A/HSPA1B/HMGB1/RHOA/LGALS3/STAT3/GNAS/RPS27A/B2M/PSMA7/PSMB6/PSME2/EIF6/NME1/PSMC5/PSMC4/H3F3A/H3F3B/PSMA6/HIST1H4I/HIST1H4A/HIST1H4D/HIST1H4F/HIST1H4K/HIST1H4J/HIST1H4C/HIST1H4H/HIST1H4B/HIST1H4E/HIST1H4L/HIST2H4A/HIST4H4/HIST2H4B/PSMA2/P4HTM/WDR61/DPY30/ANXA1/PSMB7/PSMA1/PSMC6/FAM213A/HMGB3/PSMB2/PSMD4/PSMD8/PSMC3/PSMB4/PSMA4/PSMA5/PRELID1	52
BP	GO:0035794	positive regulation of mitochondrial membrane permeability	13/1297	65/17653	0.000769354	0.00739305	0.00612274	HSPA1A/YWHAZ/YWHAB/YWHAG/YWHAQ/YWHAE/SLC25A5/SFN/YWHAH/ACAA2/ATP5IF1/BID/PPIF	13
BP	GO:1903050	regulation of proteolysis involved in cellular protein catabolic process	28/1297	201/17653	0.000797188	0.0076461	0.00633231	VCP/HSPA1A/HSPA1B/HSP90AB1/RACK1/BCAP31/RPL5/RPS7/RPL23/CAV1/PSME2/PSMC5/PSMC4/ATP5IF1/PARK7/RPL11/SUMO2/UBQLN2/GBA/SDCBP/DDRGK1/PSMC6/ERLEC1/DERL2/GIPC1/PSMC3/PTK2/OS9	28
BP	GO:0009308	amine metabolic process	21/1297	135/17653	0.00084181	0.00805891	0.00667419	PSMA7/COMT/PSMB6/PSME2/PSMC5/PSMC4/PARK7/PSMA6/PSMA2/CHDH/GCDH/PSMB7/PSMA1/PSMC6/PSMB2/PSMD4/PSMD8/PSMC3/PSMB4/PSMA4/PSMA5	21
BP	GO:0052547	regulation of peptidase activity	51/1297	441/17653	0.000844292	0.0080675	0.0066813	HSPD1/VCP/GAPDH/AIFM1/POR/PRDX5/SERPINH1/PRDX3/HMGB1/RHOA/RPS3/DDX3X/YWHAE/ASPH/CD44/RACK1/BCAP31/STAT3/HSPE1/DIABLO/SFN/GSN/CAV1/CD109/FAM162A/PSME2/CAST/PARK7/CYCS/BID/SERPINE1/CSNK2A1/APLP2/FIS1/PEBP1/GPI/LAMTOR5/TNFRSF10B/APP/DDRGK1/BCL2L13/KARS/ARL6IP5/PICALM/HIP1/USP47/NDUFA13/PDCD5/ARL6IP1/NOD1/PRELID1	51
BP	GO:0070555	response to interleukin-1	27/1297	192/17653	0.000847196	0.00808009	0.00669173	ICAM1/RPS27A/PSMA7/PSMB6/PSME2/PSMC5/PSMC4/SQSTM1/PSMA6/UBE2N/PSMA2/RBMX/ANXA1/PSMB7/UPF1/PSMA1/PSMC6/PSMB2/SKP1/PSMD4/PSMD8/PSMC3/PSMB4/PSMA4/PSMA5/NOD1/USP10	27
BP	GO:0043462	regulation of ATPase activity	14/1297	74/17653	0.000877075	0.00834942	0.00691478	HNRNPU/PFN1/DNAJB11/NAPA/DNAJA2/ATP5IF1/TOR1AIP1/TOR1AIP2/ATP1B3/SNRNP70/DNAJB1/ATP1B1/VMA21/PPIF	14
BP	GO:1904377	positive regulation of protein localization to cell periphery	12/1297	58/17653	0.000884945	0.00840863	0.00696381	ITGB1/EZR/AGR2/RACK1/RHOG/SQSTM1/ITGA3/ACSL3/CNPY4/RER1/EPB41L2/DLG1	12
BP	GO:0071824	protein-DNA complex subunit organization	36/1297	283/17653	0.000889176	0.0084331	0.00698408	NPM1/HMGB1/RUVBL1/SET/RPS27A/HIST1H1D/RPL23/PARP1/HIST1H1B/PSMC5/NAP1L1/PSMC4/CAND1/H3F3A/H3F3B/HIST1H4I/HIST1H4A/HIST1H4D/HIST1H4F/HIST1H4K/HIST1H4J/HIST1H4C/HIST1H4H/HIST1H4B/HIST1H4E/HIST1H4L/HIST2H4A/HIST4H4/HIST2H4B/HIST2H2BF/NAP1L4/RBBP4/RPA2/PSMC6/HP1BP3/PSMC3	36
BP	GO:0005996	monosaccharide metabolic process	35/1297	273/17653	0.000905085	0.00856802	0.00709582	PKM/ENO1/ALDOA/G6PD/GAPDH/TKT/MDH2/PGK1/SLC25A13/GOT2/POFUT1/ALDOC/DLAT/TPI1/PDHB/GPD2/PPP1CA/HK1/CYB5R3/PGAM1/CPT1A/PGD/SLC25A12/SLC25A10/PDHA1/PFKP/SLC25A1/MDH1/POFUT2/AIMP1/GPI/CYB5A/ABHD10/RANBP2/SLC25A11	35
BP	GO:0016241	regulation of macroautophagy	24/1297	164/17653	0.00091393	0.0086357	0.00715187	GAPDH/HMOX1/RAB1B/GNAI3/ATP6V0D1/SEC22B/SPTLC1/LARP1/SH3GLB1/CAPNS1/UBQLN2/GBA/SPTLC2/LAMTOR1/LAMTOR5/POLDIP2/RALB/SCFD1/ATP6V1A/LAMTOR3/TOMM7/NOD1/SNX5/CALCOCO2	24
BP	GO:0051973	positive regulation of telomerase activity	9/1297	36/17653	0.000930278	0.0087739	0.00726632	HSP90AB1/HNRNPA2B1/HSP90AA1/XRCC5/CCT4/CCT2/TCP1/PTGES3/HNRNPD	9
BP	GO:0035089	establishment of apical/basal cell polarity	6/1297	17/17653	0.000949547	0.00893908	0.00740312	MSN/FSCN1/RHOA/CDC42/SLC9A3R1/PTK7	6
BP	GO:0051668	localization within membrane	19/1297	118/17653	0.000954453	0.00896869	0.00742764	FLNA/AP2B1/APOE/RAB1A/GSN/MESD/SAR1A/SEC31A/STX7/RAB8A/RAC1/RALA/CDH2/RER1/SEC24C/ATP1B1/DLG1/SEC24B/HIP1	19
BP	GO:0046677	response to antibiotic	40/1297	326/17653	0.000969391	0.00909228	0.00753	HSPA5/EEF2/G6PD/CAT/TUFM/AIFM1/PSAP/ACTC1/HSP90AA1/HNRNPA1/LDHA/PRDX3/RPS4X/ICAM1/RHOA/TRAP1/RPL15/RPS3/UQCRFS1/HMOX1/GOT2/PYCR1/RACK1/STAT3/SDF4/RPL23/GSN/PARK7/RPL10A/RHOB/LARP1/TXN/HNRNPD/CRIP1/KPNA4/GSTP1/ANXA1/PPIF/PCNA/ACTR2	40
BP	GO:0007163	establishment or maintenance of cell polarity	28/1297	204/17653	0.00100612	0.00941942	0.00780092	MSN/FSCN1/RAP1B/RHOA/CFL1/RHOC/RACK1/ACTR3/CTNNA1/RAB10/MAP4/CDC42/GOLPH3/GSN/CAP1/RHOB/DCTN1/LMNA/CLIC4/DLG1/KIF2C/ERBIN/SLC9A3R1/PTK2/ACTR2/LIN7A/PTK7/ARPC5	28
BP	GO:1903900	regulation of viral life cycle	21/1297	137/17653	0.00102197	0.00955023	0.00790926	P4HB/HSPA8/PABPC1/PPIA/PPIB/DDX3X/LGALS1/VAPA/TRIM28/GSN/TRIM25/SNX3/HACD3/LARP1/VAPB/DDX5/BANF1/NECTIN2/ADAR/ILF3/STAU1	21
BP	GO:1905710	positive regulation of membrane permeability	13/1297	67/17653	0.00103674	0.00967058	0.00800894	HSPA1A/YWHAZ/YWHAB/YWHAG/YWHAQ/YWHAE/SLC25A5/SFN/YWHAH/ACAA2/ATP5IF1/BID/PPIF	13
BP	GO:0072330	monocarboxylic acid biosynthetic process	37/1297	296/17653	0.0010516	0.00979125	0.00810887	PKM/ENO1/ALDOA/GAPDH/PGK1/OGDH/LDHA/HSD17B4/FASN/SCP2/ALDOC/STAT3/TPI1/ACADVL/NDUFAB1/HK1/PTGES3/SCD/PGAM1/ERLIN1/EIF6/PARK7/HACD3/PTGES2/PFKP/ACSL3/HSD17B12/MIF/FADS2/GPI/ANXA1/DECR2/ABCD3/TECR/ACOT7/MCAT/RANBP2	37
CC	GO:0044391	ribosomal subunit	126/1317	193/18698	2.01405e-97	1.30309e-94	7.63218e-95	RPL4/RPLP0/RPLP2/RPSA/RPL3/RPL7A/RPL9/RPL7/RPS4X/RPS3A/RPL15/RPS3/DDX3X/RPL6/RPS8/RPL10/RACK1/RPS17/RPL23A/RPL5/RPL12/RPS2/RPL21/MRPL12/RPS19/RPS7/RPL8/RPL22/RPL27A/RPS27A/RPL19/RPS5/RPS18/RPL18A/RPS14/MRPS31/RPL23/RPL13/RPL14/RPS10/RPL27/MRPL1/RPL28/RPLP1/RPL30/RPS12/RPS11/RPL24/RPS16/RPS23/RPS6/RPS13/RPL18/RPL17/RPS15/RPL36/RPL31/RBM3/RPL13A/MRPL10/RPL26/RPS9/RPL37A/RPL35/MRPL4/MRPL28/RPS25/MRP…	126
CC	GO:0005840	ribosome	139/1317	242/18698	1.83397e-96	5.93288e-94	3.47488e-94	EEF2/CANX/RRBP1/RPL4/RPLP0/RPLP2/RPSA/RPL3/RPL7A/RPL9/RPL7/RPS4X/RPS3A/RPL15/RPS3/DDX3X/GCN1/RPL6/RPS8/RPL10/RACK1/RPS17/RPL23A/RPL5/RPL12/RPS2/RPL21/MRPL12/RPS19/RPS7/RPL8/RPL22/RPL27A/RPS27A/RPL19/RPS5/RPS18/RPL18A/RPS14/MRPS31/RPL23/RPL13/RPL14/RPS10/RPL27/MRPL1/RPL28/RPLP1/RPL30/RPS12/RPS11/RPL24/RPS16/RPS23/RPS6/SF1/RPS13/RPL18/RPL17/RPS15/RPL36/RPL31/RBM3/RPL13A/MRPL10/RPL26/RPS9/RPL37A/RPL…	139
CC	GO:0098798	mitochondrial protein complex	136/1317	263/18698	3.64885e-86	7.86935e-84	4.60907e-84	ATP5F1B/HADHA/HSD17B10/ATP5F1A/UQCRC2/UQCRC1/SDHA/VDAC1/TIMM50/ATP5PB/TOMM40/IMMT/ATP5PO/COX5A/UQCRFS1/SLC25A6/ATP5PD/DLAT/GRPEL1/TOMM70/NDUFA5/MRPL12/ATP5PF/NDUFS3/SUCLG2/ATP5F1C/CYC1/NDUFA8/TIMM13/MRPS31/ATP5F1D/MCCC2/COX5B/TOMM22/NDUFAB1/COX4I1/C15orf48/NDUFB10/UQCRB/TIMM17A/NDUFS1/APOO/UQCRH/NDUFV1/COX2/NDUFA10/NDUFA9/MRPL10/TOMM20/NDUFV2/ATP5MG/MRPL4/MRPL28/MRPS17/MRPL41/DAP3/ATP5IF1/MRPS27/…	136
CC	GO:0005925	focal adhesion	150/1317	393/18698	6.89785e-72	1.11573e-69	6.5348e-70	AHNAK/ACTN4/HSPA5/HYOU1/FLNA/HSP90B1/HSPA9/CLTC/PDIA3/P4HB/ACTB/HSPA8/CALR/VIM/HSPA1A/HSPA1B/NPM1/CAT/ACTN1/HNRNPK/RPL4/RPLP0/MSN/PABPC1/CTTN/ACTC1/PPIA/RPLP2/ITGB1/BSG/EZR/RPL3/RPL7A/YWHAZ/PPIB/RPL9/RPL7/GNB2/YWHAB/RPS4X/RPS3A/HSPB1/ICAM1/RHOA/YWHAG/CFL1/RPS3/RPL6/RPS8/IGF2R/ITGAV/YWHAQ/TLN1/FLNB/PCBP2/YWHAE/CD44/VCL/RPS17/RDX/ACTR3/RPL5/RPL12/RPS2/LAP3/RPS19/MARCKS/CTNNA1/RPS7/RPL8/IQGAP1/RAB10…	150
CC	GO:0030055	cell-substrate junction	151/1317	401/18698	2.04699e-71	2.56211e-69	1.50063e-69	AHNAK/ACTN4/HSPA5/HYOU1/FLNA/HSP90B1/HSPA9/CLTC/PDIA3/P4HB/ACTB/HSPA8/CALR/VIM/HSPA1A/HSPA1B/NPM1/CAT/ACTN1/HNRNPK/RPL4/RPLP0/MSN/PABPC1/CTTN/ACTC1/PPIA/RPLP2/ITGB1/BSG/EZR/RPL3/RPL7A/YWHAZ/PPIB/RPL9/RPL7/GNB2/YWHAB/RPS4X/RPS3A/HSPB1/ICAM1/RHOA/YWHAG/CFL1/RPS3/RPL6/RPS8/IGF2R/ITGAV/YWHAQ/TLN1/FLNB/PCBP2/YWHAE/CD44/VCL/RPS17/RDX/ACTR3/RPL5/RPL12/RPS2/LAP3/RPS19/MARCKS/CTNNA1/RPS7/RPL8/IQGAP1/RAB10…	151
CC	GO:0005924	cell-substrate adherens junction	150/1317	396/18698	2.37599e-71	2.56211e-69	1.50063e-69	AHNAK/ACTN4/HSPA5/HYOU1/FLNA/HSP90B1/HSPA9/CLTC/PDIA3/P4HB/ACTB/HSPA8/CALR/VIM/HSPA1A/HSPA1B/NPM1/CAT/ACTN1/HNRNPK/RPL4/RPLP0/MSN/PABPC1/CTTN/ACTC1/PPIA/RPLP2/ITGB1/BSG/EZR/RPL3/RPL7A/YWHAZ/PPIB/RPL9/RPL7/GNB2/YWHAB/RPS4X/RPS3A/HSPB1/ICAM1/RHOA/YWHAG/CFL1/RPS3/RPL6/RPS8/IGF2R/ITGAV/YWHAQ/TLN1/FLNB/PCBP2/YWHAE/CD44/VCL/RPS17/RDX/ACTR3/RPL5/RPL12/RPS2/LAP3/RPS19/MARCKS/CTNNA1/RPS7/RPL8/IQGAP1/RAB10…	150
CC	GO:0022626	cytosolic ribosome	86/1317	123/18698	1.72505e-70	1.59443e-68	9.33859e-69	RPL4/RPLP0/RPLP2/RPSA/RPL3/RPL7A/RPL9/RPL7/RPS4X/RPS3A/RPL15/RPS3/DDX3X/RPL6/RPS8/RPL10/RACK1/RPS17/RPL23A/RPL5/RPL12/RPS2/RPL21/RPS19/RPS7/RPL8/RPL22/RPL27A/RPS27A/RPL19/RPS5/RPS18/RPL18A/RPS14/RPL23/RPL13/RPL14/RPS10/RPL27/MRPL1/RPL28/RPLP1/RPL30/RPS12/RPS11/RPL24/RPS16/RPS23/RPS6/RPS13/RPL18/RPL17/RPS15/RPL36/RPL31/RPL13A/RPL26/RPS9/RPL37A/RPL35/MRPL4/RPS25/RPS26/RPL10A/MCTS1/RPL11/RPL32/RPL36…	86
CC	GO:0005759	mitochondrial matrix	157/1317	453/18698	2.59173e-68	2.09606e-66	1.22766e-66	HSPD1/ATP5F1B/HSPA9/LRPPRC/HADHA/HSD17B10/OAT/ATP5F1A/IDH2/MDH2/TUFM/ETFA/DLD/ECHS1/ACAT1/HADHB/VDAC1/FH/SHMT2/GLUD1/ACO2/PRDX5/VDAC2/OGDH/ATP5PB/LONP1/CS/C1QBP/PRDX3/TRAP1/RPS3/IARS2/LRRC59/PPA2/ALDH1B1/GOT2/PYCR1/SLC25A5/ETFB/DLST/ECI1/DLAT/ACADM/SARS2/GRPEL1/ME2/MRPL12/NDUFS3/HIBADH/HSPE1/PDHB/ACADVL/SUCLG2/SSBP1/ATP5F1C/SOD2/TSFM/IDH3A/MRPS31/ATP5F1D/MTHFD2/MCCC2/NDUFAB1/GARS/IDH3B/NDUFS1/GFM…	157
CC	GO:0044445	cytosolic part	103/1317	255/18698	4.45409e-52	3.20199e-50	1.87541e-50	HSPA8/ENO1/RPL4/RPLP0/RPLP2/CCT7/RPSA/RPL3/RPL7A/RPL9/RPL7/PRDX3/RPS4X/RPS3A/RPL15/RPS3/CCT4/DDX3X/RPL6/RPS8/RPL10/CCT2/CCT3/RACK1/RPS17/RPL23A/RPL5/RPL12/RPS2/RPL21/RPS19/TCP1/RPS7/RPL8/RPL22/CCT6A/RPL27A/RPS27A/RPL19/RPS5/RPS18/CCT8/RPL18A/RPS14/RPL23/RPL13/RPL14/RPS10/RPL27/MRPL1/RPL28/RPLP1/RPL30/RPS12/RPS11/CYB5R3/RPL24/RPS16/RPS23/RPS6/RPS13/RPL18/RPL17/RPS15/RPL36/RPL31/PSMC5/RPL13A/RPL26/…	103
CC	GO:0044455	mitochondrial membrane part	95/1317	220/18698	3.51146e-51	2.27191e-49	1.33066e-49	ATP5F1B/ATP5F1A/UQCRC2/UQCRC1/SDHA/TIMM50/ATP5PB/TOMM40/IMMT/ATP5PO/COX5A/UQCRFS1/SLC25A6/ATP5PD/GRPEL1/TOMM70/NDUFA5/OPA1/ATP5PF/NDUFS3/ATP5F1C/CYC1/NDUFA8/ATP5F1D/COX5B/TOMM22/NDUFAB1/COX4I1/NNT/C15orf48/NDUFB10/UQCRB/TIMM17A/NDUFS1/APOO/UQCRH/CPT1A/NDUFV1/COX2/NDUFA10/NDUFA9/TOMM20/NDUFV2/ATP5MG/ATP5IF1/PARK7/CHCHD3/ATP5ME/SDHB/BCS1L/TIMM9/BID/AGK/NDUFA2/NDUFB11/ATP5MF/C19orf70/NDUFA11/COX7A2/…	95
CC	GO:0015934	large ribosomal subunit	71/1317	121/18698	2.68304e-50	1.57811e-48	9.243e-49	RPL4/RPLP0/RPLP2/RPL3/RPL7A/RPL9/RPL7/RPL15/RPL6/RPL10/RPL23A/RPL5/RPL12/RPL21/MRPL12/RPL8/RPL22/RPL27A/RPL19/RPL18A/RPL23/RPL13/RPL14/RPL27/MRPL1/RPL28/RPLP1/RPL30/RPL24/RPL18/RPL17/RPL36/RPL31/RBM3/RPL13A/MRPL10/RPL26/RPL37A/RPL35/MRPL4/MRPL28/MRPL41/MRPL46/MRPL37/RPL10A/RPL11/MRPL11/RPL32/MRPL49/RPL36A/RPL34/RPL26L1/RPL38/RPL35A/MRPL52/RPL29/MRPL2/MRPL17/MRPL23/RPL39/MRPL40/MRPL54/MRPL20/MRPL2…	71
CC	GO:0098800	inner mitochondrial membrane protein complex	76/1317	141/18698	5.05083e-50	2.72324e-48	1.595e-48	ATP5F1B/ATP5F1A/UQCRC2/UQCRC1/SDHA/TIMM50/ATP5PB/IMMT/ATP5PO/COX5A/UQCRFS1/SLC25A6/ATP5PD/GRPEL1/NDUFA5/ATP5PF/NDUFS3/ATP5F1C/CYC1/NDUFA8/ATP5F1D/COX5B/NDUFAB1/COX4I1/C15orf48/NDUFB10/UQCRB/TIMM17A/NDUFS1/APOO/UQCRH/NDUFV1/COX2/NDUFA10/NDUFA9/NDUFV2/ATP5MG/ATP5IF1/PARK7/CHCHD3/ATP5ME/SDHB/BCS1L/TIMM9/AGK/NDUFA2/NDUFB11/ATP5MF/C19orf70/NDUFA11/COX6A1/NDUFB7/UQCRQ/NDUFB4/UQCR10/NDUFS8/COX7C/NDUFS2/…	76
CC	GO:0043209	myelin sheath	81/1317	164/18698	2.30997e-49	1.14965e-47	6.73351e-48	HSPD1/ATP5F1B/HSPA5/PKM/HSPA9/VCP/PDIA3/EEF1A1/ACTB/HSPA8/ANXA2/CANX/ATP5F1A/TKT/TUBB4B/MDH2/TUFM/EEF1A2/PRDX1/UQCRC2/DLD/UQCRC1/PHB/SDHA/MSN/VDAC1/TUBA1B/ACO2/ITGB1/GNB1/EZR/VDAC2/ATP5PB/HSP90AA1/IMMT/GNB2/FSCN1/PRDX3/ATP1A1/YWHAG/COX5A/GOT2/CCT2/CCT3/SLC25A5/DLST/ATP5PD/DLAT/RDX/NDUFS3/TCP1/ATP5F1C/RPS27A/ACTR1A/IDH3A/SLC25A3/CDC42/NSF/GSN/ALB/NAPA/NDUFS1/STIP1/NDUFA10/NME1/GDI1/NDUFV2/SLC25A12…	81
CC	GO:0015935	small ribosomal subunit	55/1317	73/18698	2.33757e-48	1.08029e-46	6.32725e-47	RPSA/RPS4X/RPS3A/RPS3/DDX3X/RPS8/RACK1/RPS17/RPS2/RPS19/RPS7/RPS27A/RPS5/RPS18/RPS14/MRPS31/RPS10/RPS12/RPS11/RPS16/RPS23/RPS6/RPS13/RPS15/RPS9/RPS25/MRPS17/DAP3/MRPS27/RPS26/MCTS1/MRPS18B/MRPS35/RPS27/MRPS22/RPS20/RPS24/RPS28/MRPS9/MRPS18C/RPS15A/MRPS36/EIF4G1/RPS21/MRPS11/MRPS26/MRPS16/MRPS14/MRPS12/RPS29/MRPS7/MRPS15/MRPS6/MRPS5/MRPS28	55
CC	GO:0022625	cytosolic large ribosomal subunit	47/1317	68/18698	1.42743e-38	6.15698e-37	3.60614e-37	RPL4/RPLP0/RPLP2/RPL3/RPL7A/RPL9/RPL7/RPL15/RPL6/RPL10/RPL23A/RPL5/RPL12/RPL21/RPL8/RPL22/RPL27A/RPL19/RPL18A/RPL23/RPL13/RPL14/RPL27/MRPL1/RPL28/RPLP1/RPL30/RPL24/RPL18/RPL17/RPL36/RPL31/RPL13A/RPL26/RPL37A/RPL35/RPL10A/RPL11/RPL32/RPL36A/RPL34/RPL26L1/RPL38/RPL35A/RPL29/RPL39/RSL1D1	47
CC	GO:0070469	respiratory chain	55/1317	100/18698	4.06925e-37	1.6455e-35	9.63769e-36	UQCRC2/UQCRC1/SDHA/COX5A/UQCRFS1/NDUFA5/NDUFS3/CYC1/NDUFA8/COX5B/NDUFAB1/COX4I1/NNT/C15orf48/NDUFB10/UQCRB/NDUFS1/UQCRH/NDUFV1/COX2/NDUFA10/NDUFA9/NDUFV2/PARK7/CYCS/SDHB/BCS1L/NDUFA2/HIGD1A/NDUFB11/NDUFA11/COX7A2/COX6A1/NDUFB7/UQCRQ/COX7A2L/NDUFB4/UQCR10/NDUFS8/COX7C/NDUFS2/NDUFS5/COX7B/HIGD2A/NDUFC2/NDUFA12/NDUFS6/PMPCB/NDUFA3/NDUFB3/NDUFB1/NDUFA4/NDUFB9/NDUFA13/COX3	55
CC	GO:0005746	mitochondrial respiratory chain	52/1317	93/18698	1.19634e-35	4.55312e-34	2.66676e-34	UQCRC2/UQCRC1/SDHA/COX5A/UQCRFS1/NDUFA5/NDUFS3/CYC1/NDUFA8/COX5B/NDUFAB1/COX4I1/NNT/C15orf48/NDUFB10/UQCRB/NDUFS1/UQCRH/NDUFV1/COX2/NDUFA10/NDUFA9/NDUFV2/PARK7/SDHB/BCS1L/NDUFA2/NDUFB11/NDUFA11/COX7A2/COX6A1/NDUFB7/UQCRQ/COX7A2L/NDUFB4/UQCR10/NDUFS8/COX7C/NDUFS2/NDUFS5/COX7B/NDUFC2/NDUFA12/NDUFS6/PMPCB/NDUFA3/NDUFB3/NDUFB1/NDUFA4/NDUFB9/NDUFA13/COX3	52
CC	GO:0022627	cytosolic small ribosomal subunit	38/1317	48/18698	3.26412e-35	1.17327e-33	6.87183e-34	RPSA/RPS4X/RPS3A/RPS3/DDX3X/RPS8/RACK1/RPS17/RPS2/RPS19/RPS7/RPS27A/RPS5/RPS18/RPS14/RPS10/RPS12/RPS11/RPS16/RPS23/RPS6/RPS13/RPS15/RPS9/RPS25/RPS26/MCTS1/RPS27/RPS20/RPS24/RPS28/MRPS9/MRPS18C/RPS15A/EIF4G1/RPS21/RPS29/MRPS5	38
CC	GO:0098803	respiratory chain complex	49/1317	85/18698	1.55966e-34	5.31107e-33	3.11069e-33	UQCRC2/UQCRC1/SDHA/COX5A/UQCRFS1/NDUFA5/NDUFS3/CYC1/NDUFA8/COX5B/NDUFAB1/COX4I1/C15orf48/NDUFB10/UQCRB/NDUFS1/UQCRH/NDUFV1/COX2/NDUFA10/NDUFA9/NDUFV2/PARK7/SDHB/BCS1L/NDUFA2/NDUFB11/NDUFA11/COX6A1/NDUFB7/UQCRQ/NDUFB4/UQCR10/NDUFS8/COX7C/NDUFS2/NDUFS5/COX7B/NDUFC2/NDUFA12/NDUFS6/PMPCB/NDUFA3/NDUFB3/NDUFB1/NDUFA4/NDUFB9/NDUFA13/COX3	49
CC	GO:0005844	polysome	42/1317	74/18698	2.14617e-29	6.94286e-28	4.06643e-28	EEF2/CALR/VIM/RPL7A/RPS4X/RPS3/GCN1/RPL6/RPL8/FUS/RPL19/RPL18A/EIF4B/RPL30/RPL24/RPS23/RPS6/EIF4H/RPL18/RPL36/RPL31/RPS26/YBX3/RPL10A/RPL11/RPL32/RPL36A/PSMA6/LARP1/PNPT1/RPL38/EIF2S1/RPS28/NUFIP2/RPL39/EIF4G1/RPS21/PSMA1/ATXN2/ZC3H15/RPS29/MYH10	42
CC	GO:1990204	oxidoreductase complex	51/1317	112/18698	2.59086e-29	7.98233e-28	4.67524e-28	P4HB/P4HA1/UQCRC2/DLD/UQCRC1/SDHA/OGDH/UQCRFS1/DLST/DLAT/NDUFA5/NDUFS3/PDHB/CYC1/NDUFA8/GPD2/NDUFAB1/NDUFB10/UQCRB/NDUFS1/UQCRH/NDUFV1/NDUFA10/NDUFA9/NDUFV2/PARK7/SDHB/BCS1L/PDHA1/NDUFA2/NDUFB11/GCSH/NDUFA11/NDUFB7/UQCRQ/NDUFB4/UQCR10/NDUFS8/NDUFS2/MRPS36/NDUFS5/NDUFC2/NDUFA12/NDUFS6/PMPCB/NDUFA3/NDUFB3/NDUFB1/NDUFA4/NDUFB9/NDUFA13	51
CC	GO:0042470	melanosome	48/1317	106/18698	1.58215e-27	4.45067e-26	2.60675e-26	HSPA5/GANAB/HSP90B1/CLTC/PDIA4/PDIA3/P4HB/HSPA8/ANXA2/CANX/RPN1/CALU/CTSD/SND1/HSP90AB1/PDIA6/PRDX1/ITGB1/TFRC/BSG/RAB7A/YWHAZ/HSP90AA1/PPIB/YWHAB/ATP1A1/CCT4/FASN/YWHAE/ERP29/TPP1/RAB5C/TMED10/RAB1A/RAN/RAB2A/SEC22B/NAP1L1/LAMP1/CTSB/CNP/SLC3A2/RAC1/SDCBP/TMEM33/ATP1B3/SYPL1/RAB32	48
CC	GO:0048770	pigment granule	48/1317	106/18698	1.58215e-27	4.45067e-26	2.60675e-26	HSPA5/GANAB/HSP90B1/CLTC/PDIA4/PDIA3/P4HB/HSPA8/ANXA2/CANX/RPN1/CALU/CTSD/SND1/HSP90AB1/PDIA6/PRDX1/ITGB1/TFRC/BSG/RAB7A/YWHAZ/HSP90AA1/PPIB/YWHAB/ATP1A1/CCT4/FASN/YWHAE/ERP29/TPP1/RAB5C/TMED10/RAB1A/RAN/RAB2A/SEC22B/NAP1L1/LAMP1/CTSB/CNP/SLC3A2/RAC1/SDCBP/TMEM33/ATP1B3/SYPL1/RAB32	48
CC	GO:0000313	organellar ribosome	43/1317	85/18698	2.72689e-27	7.0572e-26	4.1334e-26	MRPL12/MRPS31/MRPL10/MRPL4/MRPL28/MRPS17/MRPL41/DAP3/MRPS27/MRPL46/MRPL37/MRPS18B/MRPL11/MRPS35/MRPL49/MRPS22/MRPL52/MRPL2/MRPS9/MRPS18C/MRPL17/MRPL23/MRPS36/MRPL40/MRPS11/MRPL54/MRPS26/MRPS16/MRPL20/MRPL21/MRPS14/MRPL53/MRPL19/MRPS12/MRPL30/MRPS7/MRPL44/MRPS15/MRPS6/MRPS5/MRPL43/MRPL13/MRPS28	43
CC	GO:0005761	mitochondrial ribosome	43/1317	85/18698	2.72689e-27	7.0572e-26	4.1334e-26	MRPL12/MRPS31/MRPL10/MRPL4/MRPL28/MRPS17/MRPL41/DAP3/MRPS27/MRPL46/MRPL37/MRPS18B/MRPL11/MRPS35/MRPL49/MRPS22/MRPL52/MRPL2/MRPS9/MRPS18C/MRPL17/MRPL23/MRPS36/MRPL40/MRPS11/MRPL54/MRPS26/MRPS16/MRPL20/MRPL21/MRPS14/MRPL53/MRPL19/MRPS12/MRPL30/MRPS7/MRPL44/MRPS15/MRPS6/MRPS5/MRPL43/MRPL13/MRPS28	43
CC	GO:0042788	polysomal ribosome	25/1317	30/18698	1.27803e-24	3.18034e-23	1.86272e-23	EEF2/RPL7A/RPL6/RPL8/RPL19/RPL18A/RPL30/RPL24/RPS23/RPL18/RPL36/RPL31/RPS26/RPL10A/RPL11/RPL32/RPL36A/PNPT1/RPL38/RPS28/NUFIP2/RPL39/RPS21/ZC3H15/RPS29	25
CC	GO:0060205	cytoplasmic vesicle lumen	79/1317	338/18698	7.18053e-22	1.72067e-20	1.00779e-20	ACTN4/HYOU1/HSP90B1/PKM/VCP/EEF2/EEF1A1/HSPA8/CALR/ANXA2/ALDOA/CTSD/TUBB/CAT/HSP90AB1/TUBB4B/ACTN1/MVP/PRDX4/PPIA/XRCC6/TXNDC5/HSP90AA1/XRCC5/HMGB1/DDX3X/ALDOC/APOE/CCT2/ERP44/VCL/PA2G4/DNAJC3/B2M/CCT8/CTSA/JUP/GSN/HRNR/ALB/CYB5R3/CAP1/S100A11/FAF2/PGAM1/KPNB1/NME2/CAND1/ILF2/NPC2/PTGES2/SERPINE1/SRP14/ACAA1/HEXB/PSMA2/GNS/SPTAN1/MIF/CNN2/COTL1/OLA1/GSTP1/GPI/LGALS3BP/SDCBP/DYNC1H1/PSMB7/APP/VAT1…	79
CC	GO:0031983	vesicle lumen	79/1317	339/18698	8.74136e-22	2.01988e-20	1.18304e-20	ACTN4/HYOU1/HSP90B1/PKM/VCP/EEF2/EEF1A1/HSPA8/CALR/ANXA2/ALDOA/CTSD/TUBB/CAT/HSP90AB1/TUBB4B/ACTN1/MVP/PRDX4/PPIA/XRCC6/TXNDC5/HSP90AA1/XRCC5/HMGB1/DDX3X/ALDOC/APOE/CCT2/ERP44/VCL/PA2G4/DNAJC3/B2M/CCT8/CTSA/JUP/GSN/HRNR/ALB/CYB5R3/CAP1/S100A11/FAF2/PGAM1/KPNB1/NME2/CAND1/ILF2/NPC2/PTGES2/SERPINE1/SRP14/ACAA1/HEXB/PSMA2/GNS/SPTAN1/MIF/CNN2/COTL1/OLA1/GSTP1/GPI/LGALS3BP/SDCBP/DYNC1H1/PSMB7/APP/VAT1…	79
CC	GO:0101002	ficolin-1-rich granule	56/1317	185/18698	1.59842e-21	3.56614e-20	2.08868e-20	PKM/VCP/EEF2/EEF1A1/HSPA8/ALDOA/HSPA1A/HSPA1B/KRT1/CTSD/CAT/HSP90AB1/MVP/PRDX4/PPIA/XRCC6/HSP90AA1/HMGB1/RHOA/DDX3X/ALDOC/LGALS3/VCL/CCT8/AP2A2/JUP/GSN/ARL8A/PGAM1/KPNB1/NME2/LAMP1/CTSB/CAND1/ILF2/COPB1/SRP14/LAMP2/PSMA2/GNS/PRCP/ATP6AP2/RAC1/MIF/DYNC1LI1/COTL1/LAMTOR1/GSTP1/GPI/PSMB7/DSP/FTH1/PSMC3/PSMA5/ACTR2/ARPC5	56
CC	GO:0034774	secretory granule lumen	75/1317	321/18698	8.24183e-21	1.77749e-19	1.04107e-19	ACTN4/PKM/VCP/EEF2/EEF1A1/HSPA8/ANXA2/ALDOA/CTSD/TUBB/CAT/HSP90AB1/TUBB4B/ACTN1/MVP/PRDX4/PPIA/XRCC6/TXNDC5/HSP90AA1/XRCC5/HMGB1/DDX3X/ALDOC/CCT2/ERP44/VCL/PA2G4/DNAJC3/B2M/CCT8/CTSA/JUP/GSN/HRNR/ALB/CYB5R3/CAP1/S100A11/FAF2/PGAM1/KPNB1/NME2/CAND1/ILF2/NPC2/PTGES2/SERPINE1/SRP14/ACAA1/HEXB/PSMA2/GNS/SPTAN1/MIF/CNN2/COTL1/OLA1/GSTP1/GPI/LGALS3BP/SDCBP/DYNC1H1/PSMB7/APP/VAT1/FAM3C/S100A7/PSMC3/SCCP…	75
CC	GO:0005747	mitochondrial respiratory chain complex I	28/1317	51/18698	1.68501e-19	3.30363e-18	1.93493e-18	NDUFA5/NDUFS3/NDUFA8/NDUFAB1/NDUFB10/NDUFS1/NDUFV1/NDUFA10/NDUFA9/NDUFV2/PARK7/NDUFA2/NDUFB11/NDUFA11/NDUFB7/NDUFB4/NDUFS8/NDUFS2/NDUFS5/NDUFC2/NDUFA12/NDUFS6/NDUFA3/NDUFB3/NDUFB1/NDUFA4/NDUFB9/NDUFA13	28
CC	GO:0030964	NADH dehydrogenase complex	28/1317	51/18698	1.68501e-19	3.30363e-18	1.93493e-18	NDUFA5/NDUFS3/NDUFA8/NDUFAB1/NDUFB10/NDUFS1/NDUFV1/NDUFA10/NDUFA9/NDUFV2/PARK7/NDUFA2/NDUFB11/NDUFA11/NDUFB7/NDUFB4/NDUFS8/NDUFS2/NDUFS5/NDUFC2/NDUFA12/NDUFS6/NDUFA3/NDUFB3/NDUFB1/NDUFA4/NDUFB9/NDUFA13	28
CC	GO:0045271	respiratory chain complex I	28/1317	51/18698	1.68501e-19	3.30363e-18	1.93493e-18	NDUFA5/NDUFS3/NDUFA8/NDUFAB1/NDUFB10/NDUFS1/NDUFV1/NDUFA10/NDUFA9/NDUFV2/PARK7/NDUFA2/NDUFB11/NDUFA11/NDUFB7/NDUFB4/NDUFS8/NDUFS2/NDUFS5/NDUFC2/NDUFA12/NDUFS6/NDUFA3/NDUFB3/NDUFB1/NDUFA4/NDUFB9/NDUFA13	28
CC	GO:1904813	ficolin-1-rich granule lumen	43/1317	124/18698	2.38482e-19	4.53817e-18	2.658e-18	PKM/VCP/EEF2/EEF1A1/HSPA8/ALDOA/HSPA1A/HSPA1B/KRT1/CTSD/CAT/HSP90AB1/MVP/PRDX4/PPIA/XRCC6/HSP90AA1/HMGB1/DDX3X/ALDOC/VCL/CCT8/JUP/GSN/PGAM1/KPNB1/NME2/CTSB/CAND1/ILF2/SRP14/PSMA2/GNS/MIF/COTL1/GSTP1/GPI/PSMB7/FTH1/PSMC3/PSMA5/ACTR2/ARPC5	43
CC	GO:0005681	spliceosomal complex	52/1317	190/18698	5.9835e-18	1.10609e-16	6.47838e-17	HSPA8/HNRNPK/HNRNPA2B1/PABPC1/YBX1/HNRNPU/HNRNPA1/HNRNPH1/HNRNPF/LGALS3/HNRNPA3/SYNCRIP/SRRM2/DDX39B/SRSF1/HNRNPM/HNRNPC/U2AF2/ALYREF/SF1/HNRNPR/SNRPD1/SNRPE/DDX39A/U2AF1/U2AF1L5/SF3A3/SRRM1/SF3A1/LUC7L3/DDX5/HNRNPH3/SRSF2/SNRPD2/SNRPC/SF3B4/RBMX/LSM7/PRPF19/UPF1/DHX15/MTREX/SNRNP70/SNRPB2/TRA2B/ADAR/DHX16/MAGOHB/SNRNP200/SNRPB/AQR/SNRPD3	52
CC	GO:0000314	organellar small ribosomal subunit	20/1317	28/18698	1.41949e-17	2.48219e-16	1.45382e-16	MRPS31/MRPS17/DAP3/MRPS27/MRPS18B/MRPS35/MRPS22/MRPS9/MRPS18C/MRPS36/MRPS11/MRPS26/MRPS16/MRPS14/MRPS12/MRPS7/MRPS15/MRPS6/MRPS5/MRPS28	20
CC	GO:0005763	mitochondrial small ribosomal subunit	20/1317	28/18698	1.41949e-17	2.48219e-16	1.45382e-16	MRPS31/MRPS17/DAP3/MRPS27/MRPS18B/MRPS35/MRPS22/MRPS9/MRPS18C/MRPS36/MRPS11/MRPS26/MRPS16/MRPS14/MRPS12/MRPS7/MRPS15/MRPS6/MRPS5/MRPS28	20
CC	GO:0005791	rough endoplasmic reticulum	34/1317	90/18698	6.621e-17	1.12731e-15	6.60266e-16	CANX/RPN1/RPN2/RPL4/CKAP4/PLOD2/NUCB1/RPL6/BCAP31/DNAJC3/RPL27/RPS23/RPL18/HM13/SSR4/PLOD1/RPS26/RAB14/SRP9/SEC61A1/BAIAP2/RPS28/SRPRB/CCDC47/SEC61B/APP/RPS21/DERL2/LRPAP1/SRPRA/RPS29/DERL1/STAU1/ARL6IP1	34
CC	GO:0031970	organelle envelope lumen	32/1317	86/18698	9.06469e-16	1.50381e-14	8.8078e-15	TUBB/STOML2/CAT/AIFM1/SHMT2/AK2/TRAP1/IGF2R/COX6B1/OPA1/CACYBP/DIABLO/NDUFA8/TIMM13/GOLPH3/NDUFS1/CHCHD2/PARK7/CYCS/TIMM9/AGK/PNPT1/TIMM8A/NDUFB7/CPOX/CHCHD4/APP/NDUFS5/TIMM8B/COA6/PRELID1/TIMM10	32
CC	GO:0070069	cytochrome complex	20/1317	33/18698	1.86002e-15	3.00858e-14	1.76213e-14	UQCRC2/UQCRC1/COX5A/UQCRFS1/CYC1/COX5B/COX4I1/C15orf48/UQCRB/UQCRH/COX2/BCS1L/COX6A1/UQCRQ/UQCR10/COX7C/COX7B/PMPCB/NDUFA4/COX3	20
CC	GO:0005793	endoplasmic reticulum-Golgi intermediate compartment	38/1317	123/18698	2.30632e-15	3.63949e-14	2.13164e-14	HSPA5/P4HB/CALR/PDIA6/SERPINH1/HMGB1/NUCB1/ERP44/BCAP31/UGGT1/RAB1B/COPG1/TMED10/VMP1/TMED4/TMED9/ANPEP/RAB2A/LMAN1/ERGIC1/LMAN2/SEC22B/NUCB2/MYDGF/CD59/SURF4/TICAM2/MCFD2/CHP1/COPB1/TMED2/TMED5/CCDC115/TAPBP/RER1/VMA21/TAP1/LRPAP1	38
CC	GO:0030135	coated vesicle	59/1317	276/18698	9.11659e-15	1.40439e-13	8.22549e-14	HSPD1/CLTC/HSPA8/TFRC/AP2B1/IGF2R/APOE/BCAP31/COPG1/TMED10/ACTR1A/B2M/TMED4/TMED9/VAMP3/AP2A2/AP1B1/COPE/COPB2/LMAN1/CLTA/ARCN1/COPA/LMAN2/SNX3/SEC22B/CD59/TICAM2/SAR1A/RAB14/MCFD2/COPB1/COPZ1/TMED2/SEC31A/IER3IP1/TMED5/CLINT1/STX6/CCDC115/SCAMP1/LDLR/AP1G1/RAB8A/VAMP8/ECE1/APP/CLTB/SEC24C/TGOLN2/VMA21/AP2A1/PICALM/SEC24B/HIP1/M6PR/STON2/VAMP7/CD3D	59
CC	GO:0005766	primary lysosome	42/1317	155/18698	1.35613e-14	1.99412e-13	1.16796e-13	VCP/ANXA2/TUBB/TUBB4B/CKAP4/PSAP/TXNDC5/DDOST/RAP1B/CCT2/PA2G4/RAB5C/DNAJC3/CCT8/CTSA/VAPA/HRNR/CYB5R3/ARL8A/CAP1/FAF2/LPCAT1/SURF4/LAMP1/NPC2/PTGES2/SNAP23/HEXB/STX7/LAMP2/GNS/PRCP/VAMP8/LAMTOR1/SDCBP/DYNC1H1/VAT1/NDUFC2/S100A7/TOM1/VAMP7/ACTR2	42
CC	GO:0042582	azurophil granule	42/1317	155/18698	1.35613e-14	1.99412e-13	1.16796e-13	VCP/ANXA2/TUBB/TUBB4B/CKAP4/PSAP/TXNDC5/DDOST/RAP1B/CCT2/PA2G4/RAB5C/DNAJC3/CCT8/CTSA/VAPA/HRNR/CYB5R3/ARL8A/CAP1/FAF2/LPCAT1/SURF4/LAMP1/NPC2/PTGES2/SNAP23/HEXB/STX7/LAMP2/GNS/PRCP/VAMP8/LAMTOR1/SDCBP/DYNC1H1/VAT1/NDUFC2/S100A7/TOM1/VAMP7/ACTR2	42
CC	GO:0071013	catalytic step 2 spliceosome	33/1317	101/18698	2.60254e-14	3.74187e-13	2.19161e-13	HNRNPK/HNRNPA2B1/PABPC1/HNRNPU/HNRNPA1/HNRNPH1/HNRNPF/HNRNPA3/SYNCRIP/SRRM2/SRSF1/HNRNPM/HNRNPC/ALYREF/HNRNPR/SNRPD1/SNRPE/U2AF1/SF3A3/SRRM1/SF3A1/DDX5/SNRPD2/RBMX/LSM7/PRPF19/MTREX/SNRPB2/MAGOHB/SNRNP200/SNRPB/AQR/SNRPD3	33
CC	GO:0005753	mitochondrial proton-transporting ATP synthase complex	16/1317	23/18698	5.14276e-14	7.2334e-13	4.2366e-13	ATP5F1B/ATP5F1A/ATP5PB/ATP5PO/ATP5PD/ATP5PF/ATP5F1C/ATP5F1D/ATP5MG/ATP5IF1/ATP5ME/ATP5MF/ATP8/ATP5F1E/ATP6/PPIF	16
CC	GO:0000315	organellar large ribosomal subunit	23/1317	52/18698	1.27168e-13	1.71412e-12	1.00396e-12	MRPL12/MRPL10/MRPL4/MRPL28/MRPL41/MRPL46/MRPL37/MRPL11/MRPL49/MRPL52/MRPL2/MRPL17/MRPL23/MRPL40/MRPL54/MRPL20/MRPL21/MRPL53/MRPL19/MRPL30/MRPL44/MRPL43/MRPL13	23
CC	GO:0005762	mitochondrial large ribosomal subunit	23/1317	52/18698	1.27168e-13	1.71412e-12	1.00396e-12	MRPL12/MRPL10/MRPL4/MRPL28/MRPL41/MRPL46/MRPL37/MRPL11/MRPL49/MRPL52/MRPL2/MRPL17/MRPL23/MRPL40/MRPL54/MRPL20/MRPL21/MRPL53/MRPL19/MRPL30/MRPL44/MRPL43/MRPL13	23
CC	GO:0045259	proton-transporting ATP synthase complex	16/1317	24/18698	1.44185e-13	1.90383e-12	1.11507e-12	ATP5F1B/ATP5F1A/ATP5PB/ATP5PO/ATP5PD/ATP5PF/ATP5F1C/ATP5F1D/ATP5MG/ATP5IF1/ATP5ME/ATP5MF/ATP8/ATP5F1E/ATP6/PPIF	16
CC	GO:0005758	mitochondrial intermembrane space	28/1317	78/18698	1.62818e-13	2.10686e-12	1.23399e-12	STOML2/CAT/AIFM1/SHMT2/AK2/TRAP1/COX6B1/OPA1/DIABLO/NDUFA8/TIMM13/GOLPH3/NDUFS1/CHCHD2/PARK7/CYCS/TIMM9/AGK/PNPT1/TIMM8A/NDUFB7/CPOX/CHCHD4/NDUFS5/TIMM8B/COA6/PRELID1/TIMM10	28
CC	GO:0005798	Golgi-associated vesicle	42/1317	174/18698	9.76294e-13	1.23855e-11	7.2542e-12	CLTC/NUCB1/IGF2R/COPG1/TMED10/ACTR1A/B2M/TMED4/TMED9/COPE/COPB2/LMAN1/CLTA/ARCN1/COPA/HM13/LMAN2/SEC22B/CD59/TICAM2/SAR1A/RAB14/MCFD2/COPB1/COPZ1/TMED2/SEC31A/IER3IP1/TMED5/CCDC115/AP1G1/RAB8A/GPR89A/APP/CLTB/SEC24C/TGOLN2/VMA21/SCFD1/AP2A1/SEC24B/ADAM10	42
CC	GO:0009295	nucleoid	20/1317	43/18698	1.5749e-12	1.92257e-11	1.12604e-11	ATP5F1B/HSPA9/LRPPRC/HADHA/TUFM/HADHB/VDAC1/SHMT2/VDAC2/LONP1/LRRC59/SLC25A5/ACADVL/SSBP1/GRSF1/ATAD3A/ELAC2/POLDIP2/MPG/TRMT10C	20
CC	GO:0042645	mitochondrial nucleoid	20/1317	43/18698	1.5749e-12	1.92257e-11	1.12604e-11	ATP5F1B/HSPA9/LRPPRC/HADHA/TUFM/HADHB/VDAC1/SHMT2/VDAC2/LONP1/LRRC59/SLC25A5/ACADVL/SSBP1/GRSF1/ATAD3A/ELAC2/POLDIP2/MPG/TRMT10C	20
CC	GO:0030667	secretory granule membrane	58/1317	303/18698	2.18205e-12	2.61442e-11	1.53126e-11	CKAP4/PSAP/BSG/RAB7A/DDOST/RAP1B/RHOA/IGF2R/ITGAV/PGRMC1/LGALS3/CD44/RAB5C/TMED10/IQGAP1/RAB10/RHOG/NRAS/HMOX2/VAPA/AP2A2/ANPEP/CAV1/ADGRE5/ARL8A/CD109/CD59/LPCAT1/SURF4/LAMP1/TICAM2/RAB14/RAB6A/COPB1/TMED2/MLEC/SNAP23/LAMP2/TMX3/APLP2/PRCP/SCAMP1/RAB8A/ATP6AP2/RAC1/VAMP8/DYNC1LI1/LAMTOR1/DSP/NDUFC2/RAB18/RAP2B/TOM1/LAMTOR3/ADAM10/TRIP11/VAMP7/ABCA3	58
CC	GO:0005788	endoplasmic reticulum lumen	57/1317	297/18698	3.0274e-12	3.56133e-11	2.08587e-11	HSPA5/HYOU1/GANAB/HSP90B1/PDIA4/PDIA3/P4HB/CALR/CANX/CALU/KTN1/P4HA1/PDIA6/PRKCSH/CES1/CKAP4/TXNDC5/ERO1A/RCN1/PPIB/P4HA2/SERPINH1/NUCB1/COL18A1/LGALS1/APOE/ERP44/ERP29/UGGT1/RCN2/MFGE8/FKBP10/P3H1/DNAJC3/B2M/ALB/DNAJB11/P3H2/SUMF2/MYDGF/PDIA5/TXNDC12/LAMC1/APLP2/KDELC2/DBI/TOR1A/CRTAP/COLGALT1/APP/CDH2/ERLEC1/TGOLN2/CNPY3/LRPAP1/ADAM10/OS9	57
CC	GO:0030662	coated vesicle membrane	40/1317	171/18698	9.81408e-12	1.13388e-10	6.6411e-11	CLTC/HSPA8/TFRC/AP2B1/IGF2R/APOE/COPG1/TMED10/B2M/VAMP3/AP2A2/AP1B1/COPE/COPB2/LMAN1/CLTA/ARCN1/COPA/SEC22B/CD59/SAR1A/MCFD2/COPB1/COPZ1/TMED2/SEC31A/LDLR/AP1G1/VAMP8/CLTB/SEC24C/TGOLN2/VMA21/AP2A1/PICALM/SEC24B/HIP1/M6PR/VAMP7/CD3D	40
CC	GO:0030867	rough endoplasmic reticulum membrane	16/1317	31/18698	3.66984e-11	4.16559e-10	2.43978e-10	PLOD2/BCAP31/DNAJC3/RPL27/SSR4/PLOD1/RPS26/SRP9/RPS28/SRPRB/SEC61B/DERL2/SRPRA/RPS29/DERL1/ARL6IP1	16
CC	GO:0010494	cytoplasmic stress granule	19/1317	45/18698	4.70572e-11	5.24931e-10	3.07452e-10	PABPC1/YBX1/CAPRIN1/DDX3X/PABPC4/IGF2BP1/DDX1/G3BP1/DDX6/LARP1/KHSRP/EIF2S1/ATXN2L/NUFIP2/GIGYF2/RBM4/ATXN2/EIF4E/STAU1	19
CC	GO:0035770	ribonucleoprotein granule	42/1317	200/18698	1.19912e-10	1.31496e-09	7.70173e-10	ACTB/TUBB/NCL/CKAP4/RPLP0/PABPC1/YBX1/HNRNPU/RPS4X/CAPRIN1/DDX3X/PABPC4/RPL6/HNRNPL/PCBP1/IGF2BP1/IQGAP1/DDX1/CDC42/RPL28/G3BP1/DDX6/RPS6/GRSF1/SQSTM1/PSMA6/LARP1/KHSRP/PSMA2/EIF2S1/ATXN2L/NUFIP2/RAC1/GIGYF2/RBM4/UPF1/SARNP/ATXN2/EIF4E/PSMC3/PSMA4/STAU1	42
CC	GO:0045335	phagocytic vesicle	31/1317	124/18698	3.56021e-10	3.81322e-09	2.2334e-09	PDIA3/CALR/VIM/RAB7A/ITGAV/FLNB/RAB10/B2M/CDC42/VAMP3/GSN/ATP6V0D1/SNX3/SEC22B/LAMP1/RAB14/SNAP23/LAMP2/STX6/RAB8A/RAB23/VAMP8/ITGB5/RAB34/TAPBP/RAB11B/TAP1/RAB32/STX12/VAMP7/PIK3C3	31
CC	GO:0036464	cytoplasmic ribonucleoprotein granule	40/1317	191/18698	3.60696e-10	3.81322e-09	2.2334e-09	ACTB/TUBB/NCL/CKAP4/RPLP0/PABPC1/YBX1/HNRNPU/RPS4X/CAPRIN1/DDX3X/PABPC4/RPL6/PCBP1/IGF2BP1/IQGAP1/DDX1/CDC42/RPL28/G3BP1/DDX6/RPS6/SQSTM1/PSMA6/LARP1/KHSRP/PSMA2/EIF2S1/ATXN2L/NUFIP2/RAC1/GIGYF2/RBM4/UPF1/SARNP/ATXN2/EIF4E/PSMC3/PSMA4/STAU1	40
CC	GO:0030120	vesicle coat	20/1317	55/18698	3.65409e-10	3.81322e-09	2.2334e-09	CLTC/AP2B1/COPG1/AP2A2/COPE/COPB2/CLTA/ARCN1/COPA/SAR1A/COPB1/COPZ1/SEC31A/AP1G1/CLTB/SEC24C/AP2A1/PICALM/SEC24B/HIP1	20
CC	GO:0045277	respiratory chain complex IV	12/1317	19/18698	4.49953e-10	4.62094e-09	2.70648e-09	UQCRC2/COX5A/UQCRFS1/COX5B/COX4I1/C15orf48/COX2/COX6A1/COX7C/COX7B/NDUFA4/COX3	12
CC	GO:0005938	cell cortex	52/1317	296/18698	7.69955e-10	7.78376e-09	4.55894e-09	ACTN4/FLNA/EEF1A1/ACTB/ANXA2/ENO1/KRT19/NCL/CTTN/EZR/RHOA/CFL1/MAPRE1/FLNB/RHOC/ASPH/RDX/MARCKS/RAB10/ACTR1A/CDC42/GSN/PFN1/CAV1/CRIP2/CAP1/CLTA/DSTN/DBN1/RHOB/SEPT9/CAPZA2/EMD/SEPT2/AGTRAP/SPTAN1/DCTN1/TRIP10/UTRN/CDH2/CLTB/SEPT7/RALB/EPB41L2/PXN/GIPC1/HIP1/PTK2/MYH10/ACTR2/MYADM/CNKSR1	52
CC	GO:0016469	proton-transporting two-sector ATPase complex	19/1317	52/18698	9.1552e-10	9.11295e-09	5.33745e-09	ATP5F1B/ATP5F1A/ATP5PB/ATP5PO/ATP5PD/ATP5PF/ATP5F1C/ATP5F1D/ATP6V0D1/ATP5MG/ATP5IF1/ATP5ME/ATP5MF/CCDC115/ATP8/ATP5F1E/ATP6/ATP6V1A/PPIF	19
CC	GO:0030139	endocytic vesicle	51/1317	290/18698	1.07847e-09	1.05723e-08	6.19216e-09	HYOU1/HSP90B1/CLTC/PDIA3/CALR/VIM/RAB7A/HSP90AA1/AP2B1/IGF2R/ITGAV/APOE/FLNB/RAB5C/RAB10/RPS27A/B2M/CDC42/VAMP3/AP2A2/GSN/CAV1/ATP6V0D1/CLTA/SNX3/SEC22B/LAMP1/RAB14/SNAP23/STX7/LAMP2/STX6/LDLR/RAB8A/RAB23/VAMP8/RALA/ITGB5/RAB34/TAPBP/CLTB/RAB11B/TAP1/AP2A1/PICALM/GIPC1/HIP1/RAB32/STX12/VAMP7/PIK3C3	51
CC	GO:0030133	transport vesicle	61/1317	381/18698	1.23261e-09	1.1903e-08	6.97156e-09	CLTC/VDAC1/VDAC2/IGF2R/ERP29/RAB1B/COPG1/RAB5C/TMED10/PLIN3/RAB10/RAB1A/DNM1L/B2M/TMED9/VAMP3/COPE/COPB2/LMAN1/ATP6V0D1/CLTA/ARCN1/COPA/SEC22B/CD59/SURF4/LAMP1/SAR1A/RAB14/MCFD2/RAB6A/CHP1/COPB1/COPZ1/TMED2/SEC31A/STX6/SCAMP1/AP1G1/RAB8A/VAMP8/TOR1A/SYNGR2/AIMP1/MFF/CLTB/SEC24C/RAB11B/TGOLN2/VMA21/AP2A1/PICALM/GIPC1/SYPL1/SEC24B/TPRG1L/TRIP11/M6PR/STON2/VAMP7/TMEM230	61
CC	GO:0005751	mitochondrial respiratory chain complex IV	11/1317	17/18698	1.69449e-09	1.61226e-08	9.44301e-09	UQCRC2/COX5A/UQCRFS1/COX5B/COX4I1/C15orf48/COX2/COX6A1/COX7C/NDUFA4/COX3	11
CC	GO:0031968	organelle outer membrane	40/1317	201/18698	1.76207e-09	1.65226e-08	9.67726e-09	LRPPRC/HADHB/VDAC1/PHB2/VDAC2/TOMM40/DDX3X/CYB5B/TOMM70/OPA1/DNM1L/RPS27A/TOMM22/DHCR7/HK1/CYB5R3/CPT1A/NME1/CISD1/VDAC3/TOMM20/PGAM5/BID/NIPSNAP2/AGK/AKAP1/EMD/CNP/ACSL3/SH3GLB1/FIS1/MFF/CYB5A/VAT1/TOMM6/TOMM7/RAB32/PPP2R2B/TOMM5/TMEM109	40
CC	GO:0005750	mitochondrial respiratory chain complex III	10/1317	14/18698	2.24123e-09	2.04236e-08	1.19621e-08	UQCRC2/UQCRC1/UQCRFS1/CYC1/UQCRB/UQCRH/BCS1L/UQCRQ/UQCR10/PMPCB	10
CC	GO:0045275	respiratory chain complex III	10/1317	14/18698	2.24123e-09	2.04236e-08	1.19621e-08	UQCRC2/UQCRC1/UQCRFS1/CYC1/UQCRB/UQCRH/BCS1L/UQCRQ/UQCR10/PMPCB	10
CC	GO:0019867	outer membrane	40/1317	203/18698	2.38344e-09	2.14178e-08	1.25444e-08	LRPPRC/HADHB/VDAC1/PHB2/VDAC2/TOMM40/DDX3X/CYB5B/TOMM70/OPA1/DNM1L/RPS27A/TOMM22/DHCR7/HK1/CYB5R3/CPT1A/NME1/CISD1/VDAC3/TOMM20/PGAM5/BID/NIPSNAP2/AGK/AKAP1/EMD/CNP/ACSL3/SH3GLB1/FIS1/MFF/CYB5A/VAT1/TOMM6/TOMM7/RAB32/PPP2R2B/TOMM5/TMEM109	40
CC	GO:0000788	nuclear nucleosome	16/1317	40/18698	4.18017e-09	3.70489e-08	2.16995e-08	H3F3A/H3F3B/HIST1H4I/HIST1H4A/HIST1H4D/HIST1H4F/HIST1H4K/HIST1H4J/HIST1H4C/HIST1H4H/HIST1H4B/HIST1H4E/HIST1H4L/HIST2H4A/HIST4H4/HIST2H4B	16
CC	GO:0005741	mitochondrial outer membrane	36/1317	178/18698	7.24476e-09	6.33427e-08	3.70998e-08	HADHB/VDAC1/PHB2/VDAC2/TOMM40/DDX3X/CYB5B/TOMM70/OPA1/DNM1L/RPS27A/TOMM22/HK1/CYB5R3/CPT1A/NME1/CISD1/VDAC3/TOMM20/PGAM5/BID/NIPSNAP2/AGK/AKAP1/CNP/ACSL3/SH3GLB1/FIS1/MFF/CYB5A/VAT1/TOMM6/TOMM7/RAB32/PPP2R2B/TOMM5	36
CC	GO:0005811	lipid droplet	22/1317	77/18698	8.97209e-09	7.73992e-08	4.53327e-08	VCP/ANXA2/GAPDH/CKAP4/RAB7A/NSDHL/RAP1B/BCAP31/RAB5C/EHD1/PLIN3/SET/CAV1/CYB5R3/FAF2/LPCAT1/LPCAT2/ACSL3/SYNGR2/PRPF19/SCCPDH/HSD17B11	22
CC	GO:0005775	vacuolar lumen	35/1317	172/18698	9.89571e-09	8.42438e-08	4.93415e-08	VCP/HSPA8/ANXA2/CTSD/TUBB/TUBB4B/PSAP/TXNDC5/HSP90AA1/CCT2/PA2G4/TPP1/DNAJC3/CCT8/CTSA/HRNR/CYB5R3/CAP1/FAF2/CTSB/NPC2/PTGES2/HEXB/LAMP2/GNS/CHID1/GBA/LGMN/SDCBP/DYNC1H1/VAT1/IFI30/S100A7/SGSH/ACTR2	35
CC	GO:0044448	cell cortex part	34/1317	166/18698	1.34929e-08	1.13376e-07	6.64041e-08	ACTN4/FLNA/EEF1A1/ACTB/ENO1/KRT19/CTTN/EZR/CFL1/MAPRE1/ASPH/RDX/RAB10/ACTR1A/GSN/CAP1/CLTA/DSTN/DBN1/SEPT9/CAPZA2/EMD/SEPT2/SPTAN1/DCTN1/UTRN/CDH2/CLTB/SEPT7/RALB/EPB41L2/HIP1/ACTR2/MYADM	34
CC	GO:0031227	intrinsic component of endoplasmic reticulum membrane	32/1317	152/18698	1.79269e-08	1.48701e-07	8.70942e-08	HSPA5/CALR/CANX/RRBP1/ESYT1/RTN4/BCAP31/ZMPSTE24/DHCR7/EMC2/HM13/FKBP8/HACD3/SEC63/SEC61A1/EMC1/TMCO1/MMGT1/LBR/TAPBP/TMEM33/PIGT/PIGU/TBL2/DPM3/ESYT2/TECR/DERL2/TAP1/EMC10/DERL1/ARL6IP1	32
CC	GO:0015629	actin cytoskeleton	69/1317	487/18698	1.923e-08	1.57491e-07	9.22426e-08	AHNAK/ACTN4/FLNA/EEF1A1/ACTB/ALDOA/KRT19/STOML2/ACTN1/HNRNPK/CTTN/ACTC1/EZR/FSCN1/CFL1/FLNB/VCL/RDX/ACTR3/MARCKS/CTNNA1/IQGAP1/ACTR1A/JUP/GSN/HNRNPC/CAP1/GNG12/DSTN/DBN1/CAPZB/CAPZA1/SEPT9/MYL6/CORO1C/ARPC2/CAPZA2/ARPC4/BAIAP2/SPTAN1/RAC1/DCTN1/CNN2/ANXA1/TJP1/UTRN/CDH2/VASP/PLS3/TPM3/ARPC1B/CLIC4/SEPT7/EPB41L2/DCTN2/ARPC5L/PXN/LIMA1/NPM3/SLC9A3R1/HIP1/SCNN1D/PPP1R12A/PTK2/MYH10/ACTR2/ARPC5/MYADM…	69
CC	GO:0000784	nuclear chromosome, telomeric region	28/1317	124/18698	2.81415e-08	2.27594e-07	1.33302e-07	XRCC6/XRCC5/PPP1CA/PARP1/ALYREF/SSB/H3F3A/H3F3B/HIST1H4I/HIST1H4A/HIST1H4D/HIST1H4F/HIST1H4K/HIST1H4J/HIST1H4C/HIST1H4H/HIST1H4B/HIST1H4E/HIST1H4L/HIST2H4A/HIST4H4/HIST2H4B/MCM3/RPA2/UPF1/CBX3/PCNA/PPP1R10	28
CC	GO:0005774	vacuolar membrane	61/1317	414/18698	3.05982e-08	2.44408e-07	1.4315e-07	AHNAK/CLTC/EEF1A1/HSPA8/ANXA2/RPN2/HSP90AB1/EEF1A2/CKAP4/PSAP/GNB1/RAB7A/DDOST/GNB2/RAP1B/AP2B1/IGF2R/RAB5C/VMP1/CTSA/VAPA/NSF/AP2A2/AP1B1/ANPEP/RAB2A/NAPA/ARL8A/GNAI3/ATP6V0D1/CLTA/GNA11/HM13/LPCAT1/SURF4/LAMP1/RAB14/STX7/LAMP2/PCYOX1/CCDC115/SH3GLB1/PRCP/LDLR/AP1G1/GBA/VAMP8/ECE1/LAMTOR1/LAMTOR5/NDUFC2/AP2A1/TOM1/ATP6V1A/LAMTOR3/AP3M1/M6PR/VAMP7/OSTM1/RDH14/CALCOCO2	61
CC	GO:0030176	integral component of endoplasmic reticulum membrane	31/1317	148/18698	3.3783e-08	2.66556e-07	1.56122e-07	HSPA5/CALR/CANX/RRBP1/ESYT1/RTN4/BCAP31/ZMPSTE24/DHCR7/EMC2/HM13/FKBP8/HACD3/SEC63/SEC61A1/EMC1/TMCO1/MMGT1/LBR/TAPBP/TMEM33/PIGT/PIGU/TBL2/DPM3/TECR/DERL2/TAP1/EMC10/DERL1/ARL6IP1	31
CC	GO:0030117	membrane coat	24/1317	98/18698	5.2484e-08	4.0159e-07	2.35211e-07	CLTC/AP2B1/IGF2R/COPG1/AP2A2/AP1B1/COPE/COPB2/CLTA/ARCN1/COPA/SAR1A/COPB1/COPZ1/SEC31A/AP1G1/EPS15L1/CLTB/SEC24C/AP2A1/PICALM/AP3M1/SEC24B/HIP1	24
CC	GO:0048475	coated membrane	24/1317	98/18698	5.2484e-08	4.0159e-07	2.35211e-07	CLTC/AP2B1/IGF2R/COPG1/AP2A2/AP1B1/COPE/COPB2/CLTA/ARCN1/COPA/SAR1A/COPB1/COPZ1/SEC31A/AP1G1/EPS15L1/CLTB/SEC24C/AP2A1/PICALM/AP3M1/SEC24B/HIP1	24
CC	GO:0035578	azurophil granule lumen	23/1317	91/18698	5.27592e-08	4.0159e-07	2.35211e-07	VCP/ANXA2/TUBB/TUBB4B/TXNDC5/CCT2/PA2G4/DNAJC3/CCT8/CTSA/HRNR/CYB5R3/CAP1/FAF2/NPC2/PTGES2/HEXB/GNS/SDCBP/DYNC1H1/VAT1/S100A7/ACTR2	23
CC	GO:0030660	Golgi-associated vesicle membrane	26/1317	113/18698	5.82484e-08	4.38218e-07	2.56664e-07	CLTC/COPG1/TMED10/B2M/COPE/COPB2/LMAN1/CLTA/ARCN1/COPA/HM13/SEC22B/CD59/SAR1A/MCFD2/COPB1/COPZ1/TMED2/SEC31A/AP1G1/GPR89A/CLTB/SEC24C/VMA21/AP2A1/SEC24B	26
CC	GO:0005765	lysosomal membrane	54/1317	355/18698	6.49803e-08	4.77753e-07	2.7982e-07	AHNAK/CLTC/EEF1A1/HSPA8/ANXA2/HSP90AB1/EEF1A2/CKAP4/PSAP/GNB1/RAB7A/DDOST/GNB2/RAP1B/AP2B1/IGF2R/RAB5C/CTSA/VAPA/NSF/AP2A2/AP1B1/ANPEP/RAB2A/ARL8A/GNAI3/ATP6V0D1/CLTA/GNA11/HM13/LPCAT1/SURF4/LAMP1/RAB14/STX7/LAMP2/PRCP/LDLR/AP1G1/GBA/VAMP8/ECE1/LAMTOR1/LAMTOR5/NDUFC2/AP2A1/TOM1/ATP6V1A/LAMTOR3/AP3M1/M6PR/VAMP7/OSTM1/RDH14	54
CC	GO:0098852	lytic vacuole membrane	54/1317	355/18698	6.49803e-08	4.77753e-07	2.7982e-07	AHNAK/CLTC/EEF1A1/HSPA8/ANXA2/HSP90AB1/EEF1A2/CKAP4/PSAP/GNB1/RAB7A/DDOST/GNB2/RAP1B/AP2B1/IGF2R/RAB5C/CTSA/VAPA/NSF/AP2A2/AP1B1/ANPEP/RAB2A/ARL8A/GNAI3/ATP6V0D1/CLTA/GNA11/HM13/LPCAT1/SURF4/LAMP1/RAB14/STX7/LAMP2/PRCP/LDLR/AP1G1/GBA/VAMP8/ECE1/LAMTOR1/LAMTOR5/NDUFC2/AP2A1/TOM1/ATP6V1A/LAMTOR3/AP3M1/M6PR/VAMP7/OSTM1/RDH14	54
CC	GO:0030670	phagocytic vesicle membrane	20/1317	72/18698	7.10434e-08	5.16461e-07	3.02491e-07	CALR/RAB7A/RAB10/B2M/VAMP3/ATP6V0D1/SEC22B/LAMP1/SNAP23/LAMP2/RAB8A/RAB23/VAMP8/RAB34/TAPBP/RAB11B/TAP1/RAB32/VAMP7/PIK3C3	20
CC	GO:0000502	proteasome complex	19/1317	66/18698	8.02097e-08	5.76619e-07	3.37725e-07	VCP/HSPB1/PSMA7/PSMB6/PSME2/PSMC5/PSMC4/PSMA6/PSMA2/PSMB7/PSMA1/PSMC6/PSMB2/PSMD4/PSMD8/PSMC3/PSMB4/PSMA4/PSMA5	19
CC	GO:1905369	endopeptidase complex	19/1317	67/18698	1.04622e-07	7.43854e-07	4.35675e-07	VCP/HSPB1/PSMA7/PSMB6/PSME2/PSMC5/PSMC4/PSMA6/PSMA2/PSMB7/PSMA1/PSMC6/PSMB2/PSMD4/PSMD8/PSMC3/PSMB4/PSMA4/PSMA5	19
CC	GO:0098589	membrane region	49/1317	314/18698	1.18307e-07	8.32006e-07	4.87305e-07	AHNAK/EEF2/ANXA2/CTSD/TUBB/STOML2/MYOF/VDAC1/PGK1/TUBA1B/EIF5A/ITGB1/BSG/EZR/CAVIN1/SERPINH1/ATP1A1/ICAM1/HMOX1/SLC25A5/GNAI2/CTNNA1/IQGAP1/HK1/CAV1/GNAI3/XPO1/PRKAR2A/PARK7/S100A10/CORO1C/LDHB/LAMP2/LAMTOR1/LAMTOR5/SDCBP/APP/PPP2R1B/CDH2/ATP1B3/ATP1B1/DLG1/RAP2B/LAMTOR3/RANBP2/SLC9A3R1/TRIP11/STX12/MYADM	49
CC	GO:0033116	endoplasmic reticulum-Golgi intermediate compartment membrane	19/1317	68/18698	1.35678e-07	9.43908e-07	5.52846e-07	CALR/BCAP31/RAB1B/TMED10/VMP1/TMED9/RAB2A/LMAN1/ERGIC1/LMAN2/SEC22B/CD59/SURF4/MCFD2/TMED2/TMED5/TAPBP/VMA21/TAP1	19
CC	GO:0005635	nuclear envelope	63/1317	455/18698	1.85761e-07	1.27859e-06	7.48868e-07	CALR/LRPPRC/GAPDH/TUBB/MYOF/MVP/YBX1/EIF5A/RTN4/LRRC59/IGF2R/ZMPSTE24/CACYBP/MATR3/SLC16A3/VAPA/PARP1/DHCR7/RAN/XPO1/KPNB1/CLIC1/NUCB2/MTDH/HACD3/RTCB/TOR1AIP1/TOR1AIP2/PGRMC2/EMD/KPNA1/KPNA2/EBP/RANBP1/HTATIP2/TMPO/RANGAP1/KPNA4/BANF1/DCTN1/TOR1A/NDUFB4/UBXN4/LBR/AGFG1/SDCBP/TMEM33/CERS2/APP/S100A6/MGST3/LMNA/MRPS23/JPT1/MRPL19/RANBP2/ERBIN/CBX3/UBE2I/TRA2B/TMEM43/CEP70/TMEM109	63
CC	GO:0000781	chromosome, telomeric region	31/1317	159/18698	1.88287e-07	1.28233e-06	7.51061e-07	HNRNPA2B1/XRCC6/XRCC5/PPP1CA/PARP1/PTGES3/ALYREF/SSB/H3F3A/H3F3B/HIST1H4I/HIST1H4A/HIST1H4D/HIST1H4F/HIST1H4K/HIST1H4J/HIST1H4C/HIST1H4H/HIST1H4B/HIST1H4E/HIST1H4L/HIST2H4A/HIST4H4/HIST2H4B/MCM3/RPA2/DPY30/UPF1/CBX3/PCNA/PPP1R10	31
CC	GO:0035577	azurophil granule membrane	17/1317	58/18698	2.88706e-07	1.94576e-06	1.13963e-06	CKAP4/PSAP/DDOST/RAP1B/RAB5C/VAPA/ARL8A/LPCAT1/SURF4/LAMP1/LAMP2/PRCP/VAMP8/LAMTOR1/NDUFC2/TOM1/VAMP7	17
CC	GO:0030137	COPI-coated vesicle	11/1317	25/18698	3.60186e-07	2.40248e-06	1.40713e-06	COPG1/TMED10/ACTR1A/COPE/COPB2/ARCN1/COPA/COPB1/COPZ1/TMED2/CCDC115	11
CC	GO:0005832	chaperonin-containing T-complex	8/1317	13/18698	5.54567e-07	3.62429e-06	2.12274e-06	CCT7/CCT4/CCT2/CCT3/TCP1/CCT6A/CCT8/CCT5	8
CC	GO:0045263	proton-transporting ATP synthase complex, coupling factor F(o)	8/1317	13/18698	5.54567e-07	3.62429e-06	2.12274e-06	ATP5PB/ATP5PD/ATP5PF/ATP5MG/ATP5ME/ATP5MF/ATP8/ATP6	8
CC	GO:0005852	eukaryotic translation initiation factor 3 complex	9/1317	17/18698	6.01623e-07	3.8925e-06	2.27984e-06	DDX3X/ABCE1/EIF3A/EIF3H/EIF3K/EIF3G/EIF3B/EIF3I/EIF3J	9
CC	GO:0030666	endocytic vesicle membrane	30/1317	161/18698	8.13413e-07	5.21068e-06	3.05189e-06	CLTC/CALR/RAB7A/AP2B1/APOE/RAB10/RPS27A/B2M/VAMP3/AP2A2/CAV1/ATP6V0D1/SEC22B/LAMP1/SNAP23/LAMP2/LDLR/RAB8A/RAB23/VAMP8/RAB34/TAPBP/RAB11B/TAP1/AP2A1/PICALM/HIP1/RAB32/VAMP7/PIK3C3	30
CC	GO:0005742	mitochondrial outer membrane translocase complex	7/1317	10/18698	8.41193e-07	5.3358e-06	3.12517e-06	TOMM40/TOMM70/TOMM22/TOMM20/TOMM6/TOMM7/TOMM5	7
CC	GO:0005839	proteasome core complex	10/1317	22/18698	8.57895e-07	5.38891e-06	3.15628e-06	PSMA7/PSMB6/PSMA6/PSMA2/PSMB7/PSMA1/PSMB2/PSMB4/PSMA4/PSMA5	10
CC	GO:0030136	clathrin-coated vesicle	32/1317	179/18698	9.23974e-07	5.74818e-06	3.36671e-06	CLTC/HSPA8/TFRC/AP2B1/IGF2R/APOE/BCAP31/TMED10/TMED9/VAMP3/AP2A2/AP1B1/CLTA/SNX3/RAB14/CLINT1/STX6/SCAMP1/LDLR/AP1G1/RAB8A/VAMP8/ECE1/CLTB/TGOLN2/AP2A1/PICALM/HIP1/M6PR/STON2/VAMP7/CD3D	32
CC	GO:0099568	cytoplasmic region	62/1317	468/18698	1.08434e-06	6.68163e-06	3.91342e-06	ACTN4/FLNA/EEF1A1/ACTB/ANXA2/CANX/ENO1/KRT19/NCL/CTTN/EZR/HSPB1/RHOA/CFL1/MAPRE1/FLNB/RHOC/ASPH/RDX/OPA1/MARCKS/RAB10/ACTR1A/MAP4/CDC42/GSN/PFN1/CAV1/CRIP2/CAP1/CLTA/PRKAR2A/DSTN/DBN1/RHOB/SEPT9/CAPZA2/EMD/SEPT2/BAIAP2/AGTRAP/RANGAP1/SPTAN1/DCTN1/TRIP10/UTRN/CDH2/CLTB/SEPT7/RALB/EPB41L2/PXN/RAB21/AP3M1/GIPC1/HIP1/PIK3C3/PTK2/MYH10/ACTR2/MYADM/CNKSR1	62
CC	GO:0032592	integral component of mitochondrial membrane	18/1317	70/18698	1.11261e-06	6.79115e-06	3.97757e-06	TOMM40/IMMT/TOMM22/TIMM17A/APOO/CPT1A/TOMM20/CHCHD3/BID/AGK/C19orf70/FIS1/COA3/MFF/MPC1/L2HGDH/MINOS1/TOMM7	18
CC	GO:0101031	chaperone complex	8/1317	14/18698	1.21375e-06	7.30269e-06	4.27718e-06	CCT7/CCT4/CCT2/CCT3/TCP1/CCT6A/CCT8/CCT5	8
CC	GO:0070820	tertiary granule	30/1317	164/18698	1.219e-06	7.30269e-06	4.27718e-06	ALDOA/CTSD/RHOA/ALDOC/LGALS3/B2M/NRAS/AP2A2/ARL8A/CD59/LAMP1/RAB14/ILF2/COPB1/SNAP23/STX7/LAMP2/PRCP/ATP6AP2/SPTAN1/RAC1/VAMP8/DYNC1LI1/CNN2/LAMTOR1/DSP/FTH1/RAP2B/LAMTOR3/ADAM10	30
CC	GO:1905368	peptidase complex	21/1317	92/18698	1.23466e-06	7.32866e-06	4.29239e-06	VCP/HSPB1/PSMA7/PSMB6/PSME2/PSMC5/PSMC4/PSMA6/PSMA2/SPCS3/PSMB7/PSMA1/PSMC6/PSMB2/SEC11A/PSMD4/PSMD8/PSMC3/PSMB4/PSMA4/PSMA5	21
CC	GO:0098573	intrinsic component of mitochondrial membrane	18/1317	71/18698	1.39323e-06	8.19471e-06	4.79964e-06	TOMM40/IMMT/TOMM22/TIMM17A/APOO/CPT1A/TOMM20/CHCHD3/BID/AGK/C19orf70/FIS1/COA3/MFF/MPC1/L2HGDH/MINOS1/TOMM7	18
CC	GO:0098857	membrane microdomain	45/1317	303/18698	1.56437e-06	9.11845e-06	5.34067e-06	AHNAK/EEF2/ANXA2/CTSD/TUBB/STOML2/MYOF/VDAC1/PGK1/TUBA1B/ITGB1/BSG/EZR/CAVIN1/SERPINH1/ATP1A1/ICAM1/HMOX1/SLC25A5/GNAI2/CTNNA1/IQGAP1/HK1/CAV1/GNAI3/PRKAR2A/PARK7/S100A10/CORO1C/LDHB/LAMP2/LAMTOR1/LAMTOR5/SDCBP/APP/PPP2R1B/CDH2/ATP1B3/ATP1B1/DLG1/RAP2B/LAMTOR3/SLC9A3R1/STX12/MYADM	45
CC	GO:0030132	clathrin coat of coated pit	9/1317	19/18698	2.00874e-06	1.16041e-05	6.79649e-06	CLTC/AP2B1/AP2A2/CLTA/EPS15L1/CLTB/AP2A1/PICALM/HIP1	9
CC	GO:0000276	mitochondrial proton-transporting ATP synthase complex, coupling factor F(o)	7/1317	11/18698	2.17184e-06	1.23262e-05	7.21942e-06	ATP5PB/ATP5PD/ATP5PF/ATP5MG/ATP5ME/ATP5MF/ATP8	7
CC	GO:0005885	Arp2/3 protein complex	7/1317	11/18698	2.17184e-06	1.23262e-05	7.21942e-06	ACTR3/ARPC2/ARPC4/ARPC1B/ARPC5L/ACTR2/ARPC5	7
CC	GO:0005684	U2-type spliceosomal complex	16/1317	60/18698	2.59193e-06	1.45824e-05	8.54091e-06	SRRM2/U2AF2/SNRPD1/SNRPE/SF3A1/LUC7L3/SNRPD2/SNRPC/LSM7/PRPF19/DHX15/SNRNP70/SNRPB2/SNRPB/AQR/SNRPD3	16
CC	GO:0000786	nucleosome	22/1317	105/18698	3.19747e-06	1.76817e-05	1.03562e-05	HIST1H1D/HIST1H1B/HIST1H2AE/HIST1H2AB/H3F3A/H3F3B/HIST1H4I/HIST1H4A/HIST1H4D/HIST1H4F/HIST1H4K/HIST1H4J/HIST1H4C/HIST1H4H/HIST1H4B/HIST1H4E/HIST1H4L/HIST2H4A/HIST4H4/HIST2H4B/HIST2H2BF/HP1BP3	22
CC	GO:0030863	cortical cytoskeleton	22/1317	105/18698	3.19747e-06	1.76817e-05	1.03562e-05	ACTN4/FLNA/EEF1A1/ACTB/KRT19/CTTN/EZR/CFL1/MAPRE1/RDX/GSN/CAP1/DSTN/DBN1/CAPZA2/SPTAN1/UTRN/CDH2/EPB41L2/HIP1/ACTR2/MYADM	22
CC	GO:0045121	membrane raft	44/1317	302/18698	3.40964e-06	1.86952e-05	1.09498e-05	AHNAK/EEF2/ANXA2/CTSD/TUBB/STOML2/MYOF/VDAC1/PGK1/TUBA1B/ITGB1/BSG/EZR/CAVIN1/SERPINH1/ATP1A1/ICAM1/HMOX1/SLC25A5/GNAI2/CTNNA1/IQGAP1/HK1/CAV1/GNAI3/PRKAR2A/PARK7/S100A10/CORO1C/LDHB/LAMTOR1/LAMTOR5/SDCBP/APP/PPP2R1B/CDH2/ATP1B3/ATP1B1/DLG1/RAP2B/LAMTOR3/SLC9A3R1/STX12/MYADM	44
CC	GO:0005777	peroxisome	25/1317	131/18698	4.20858e-06	2.26912e-05	1.32902e-05	VIM/ECH1/TKT/CAT/IDH2/PRDX5/HSD17B4/SCP2/ACOX1/DNM1L/HSDL2/AGPS/ACAA1/HMGCL/GRHPR/ACSL3/FIS1/GSTK1/MFF/DECR2/ABCD3/ZADH2/PEX14/PIK3C3/NUDT12	25
CC	GO:0042579	microbody	25/1317	131/18698	4.20858e-06	2.26912e-05	1.32902e-05	VIM/ECH1/TKT/CAT/IDH2/PRDX5/HSD17B4/SCP2/ACOX1/DNM1L/HSDL2/AGPS/ACAA1/HMGCL/GRHPR/ACSL3/FIS1/GSTK1/MFF/DECR2/ABCD3/ZADH2/PEX14/PIK3C3/NUDT12	25
CC	GO:0005685	U1 snRNP	9/1317	21/18698	5.61689e-06	3.00341e-05	1.7591e-05	SNRPD1/SNRPE/LUC7L3/SNRPD2/SNRPC/SNRNP70/SNRPB2/SNRPB/SNRPD3	9
CC	GO:0030140	trans-Golgi network transport vesicle	11/1317	32/18698	6.58402e-06	3.49169e-05	2.04508e-05	CLTC/IGF2R/TMED10/TMED9/CLTA/RAB14/AP1G1/RAB8A/CLTB/TGOLN2/AP2A1	11
CC	GO:0005790	smooth endoplasmic reticulum	11/1317	33/18698	9.24966e-06	4.86547e-05	2.8497e-05	HSPA5/HYOU1/CALR/CANX/PRDX4/PPIB/RPL10/PGRMC1/ERP29/DNAJC3/APP	11
CC	GO:0044815	DNA packaging complex	22/1317	112/18698	9.64105e-06	5.03045e-05	2.94633e-05	HIST1H1D/HIST1H1B/HIST1H2AE/HIST1H2AB/H3F3A/H3F3B/HIST1H4I/HIST1H4A/HIST1H4D/HIST1H4F/HIST1H4K/HIST1H4J/HIST1H4C/HIST1H4H/HIST1H4B/HIST1H4E/HIST1H4L/HIST2H4A/HIST4H4/HIST2H4B/HIST2H2BF/HP1BP3	22
CC	GO:0030665	clathrin-coated vesicle membrane	21/1317	104/18698	9.76855e-06	5.0562e-05	2.96141e-05	CLTC/HSPA8/TFRC/AP2B1/IGF2R/APOE/VAMP3/AP2A2/AP1B1/CLTA/LDLR/AP1G1/VAMP8/CLTB/TGOLN2/AP2A1/PICALM/HIP1/M6PR/VAMP7/CD3D	21
CC	GO:0030134	COPII-coated ER to Golgi transport vesicle	19/1317	90/18698	1.31391e-05	6.74681e-05	3.9516e-05	TMED10/B2M/TMED4/TMED9/LMAN1/LMAN2/SEC22B/CD59/TICAM2/SAR1A/MCFD2/TMED2/SEC31A/IER3IP1/TMED5/APP/SEC24C/VMA21/SEC24B	19
CC	GO:0030496	midbody	28/1317	166/18698	1.3605e-05	6.8315e-05	4.0012e-05	HSPA5/HSP90B1/ANXA2/HNRNPU/RHOA/RACK1/RDX/GNAI2/LAP3/IQGAP1/CTNND1/CDC42/RAN/ARL8A/GNAI3/GDI1/SEPT2/SH3GLB1/RALA/ERH/CLIC4/SEPT7/RALB/SCCPDH/PIK3C3/MYH10/CEP126/TTC28	28
CC	GO:0030663	COPI-coated vesicle membrane	8/1317	18/18698	1.36985e-05	6.8315e-05	4.0012e-05	COPG1/COPE/COPB2/ARCN1/COPA/COPB1/COPZ1/TMED2	8
CC	GO:0033177	proton-transporting two-sector ATPase complex, proton-transporting domain	9/1317	23/18698	1.37263e-05	6.8315e-05	4.0012e-05	ATP5PB/ATP5PD/ATP5PF/ATP6V0D1/ATP5MG/ATP5ME/ATP5MF/ATP8/ATP6	9
CC	GO:0071010	prespliceosome	9/1317	23/18698	1.37263e-05	6.8315e-05	4.0012e-05	U2AF2/SNRPD1/SF3A1/LUC7L3/SNRPC/LSM7/SNRNP70/SNRPB/SNRPD3	9
CC	GO:0098799	outer mitochondrial membrane protein complex	7/1317	14/18698	1.86998e-05	9.23571e-05	5.40935e-05	TOMM40/TOMM70/TOMM22/TOMM20/TOMM6/TOMM7/TOMM5	7
CC	GO:0034663	endoplasmic reticulum chaperone complex	6/1317	10/18698	1.98093e-05	9.70955e-05	5.68688e-05	HSPA5/HYOU1/HSP90B1/P4HB/PDIA6/PPIB	6
CC	GO:0032993	protein-DNA complex	31/1317	198/18698	2.24045e-05	0.00010899	6.38354e-05	NPM1/XRCC6/XRCC5/HIST1H1D/PARP1/JUP/HIST1H1B/HIST1H2AE/HIST1H2AB/H3F3A/H3F3B/HIST1H4I/HIST1H4A/HIST1H4D/HIST1H4F/HIST1H4K/HIST1H4J/HIST1H4C/HIST1H4H/HIST1H4B/HIST1H4E/HIST1H4L/HIST2H4A/HIST4H4/HIST2H4B/HIST2H2BF/MCM3/RPA2/PRPF19/HP1BP3/PCNA	31
CC	GO:0030118	clathrin coat	13/1317	49/18698	2.37441e-05	0.000114645	6.71474e-05	CLTC/AP2B1/IGF2R/AP2A2/AP1B1/CLTA/AP1G1/EPS15L1/CLTB/AP2A1/PICALM/AP3M1/HIP1	13
CC	GO:0005913	cell-cell adherens junction	21/1317	110/18698	2.399e-05	0.000114974	6.73403e-05	ANXA2/KRT18/ACTN1/VCL/RDX/CTNNA1/RAB10/CTNND1/PPP1CA/JUP/PAK4/S100A11/PARK7/SNAP23/BAIAP2/ANXA1/TJP1/CDH2/DSP/NECTIN2/EIF4G2	21
CC	GO:0001726	ruffle	27/1317	164/18698	3.00784e-05	0.000143093	8.38097e-05	EEF1A1/ANXA2/ACTN1/CTTN/ITGB1/EZR/HSP90AA1/FSCN1/RHOA/CFL1/RPS3/ITGAV/TLN1/RDX/IQGAP1/GSN/S100A11/NME2/NME1/EPS8L2/BAIAP2/RAC1/S100A6/ITGA5/SLC9A3R1/SNX5/MYADM	27
CC	GO:0030126	COPI vesicle coat	7/1317	15/18698	3.29273e-05	0.000155504	9.10783e-05	COPG1/COPE/COPB2/ARCN1/COPA/COPB1/COPZ1	7
CC	GO:0036019	endolysosome	8/1317	20/18698	3.47178e-05	0.0001616	9.4649e-05	CLTC/AP2B1/AP2A2/CLTA/CTSB/LDLR/LGMN/AP2A1	8
CC	GO:0071782	endoplasmic reticulum tubular network	8/1317	20/18698	3.47178e-05	0.0001616	9.4649e-05	RTN4/ATL3/ASPH/RAB10/KPNB1/REEP5/EMD/RAB18	8
CC	GO:0005905	clathrin-coated pit	15/1317	67/18698	5.1058e-05	0.000235961	0.000138202	HSPD1/CLTC/CTTN/TFRC/AP2B1/DNM1L/AP2A2/CLTA/LDLR/EPS15L1/APP/CLTB/AP2A1/PICALM/HIP1	15
CC	GO:0032432	actin filament bundle	14/1317	60/18698	5.56031e-05	0.000255143	0.000149437	ACTN4/ACTN1/FSCN1/FLNB/MARCKS/SEPT9/CNN2/PLS3/TPM3/SEPT7/PXN/LIMA1/PTK2/MYH10	14
CC	GO:0005689	U12-type spliceosomal complex	9/1317	27/18698	6.08592e-05	0.000275356	0.000161276	YBX1/SNRPD1/SNRPE/SNRPD2/SF3B4/LSM7/DHX15/SNRPB/SNRPD3	9
CC	GO:0030125	clathrin vesicle coat	9/1317	27/18698	6.08592e-05	0.000275356	0.000161276	CLTC/AP2B1/AP2A2/CLTA/AP1G1/CLTB/AP2A1/PICALM/HIP1	9
CC	GO:0005687	U4 snRNP	6/1317	12/18698	7.70544e-05	0.000339144	0.000198636	DDX39B/SNRPD1/SNRPE/SNRPD2/SNRPB/SNRPD3	6
CC	GO:0008250	oligosaccharyltransferase complex	6/1317	12/18698	7.70544e-05	0.000339144	0.000198636	RPN1/RPN2/DDOST/DAD1/STT3A/OSTC	6
CC	GO:0017101	aminoacyl-tRNA synthetase multienzyme complex	6/1317	12/18698	7.70544e-05	0.000339144	0.000198636	QARS/EPRS/AIMP1/YARS/KARS/DARS	6
CC	GO:0034709	methylosome	6/1317	12/18698	7.70544e-05	0.000339144	0.000198636	SNRPD1/SNRPE/SNRPD2/ERH/SNRPB/SNRPD3	6
CC	GO:0031252	cell leading edge	48/1317	385/18698	8.20769e-05	0.000358809	0.000210154	EEF1A1/VIM/ANXA2/ACTN1/CTTN/ACTC1/ITGB1/EZR/HSP90AA1/FSCN1/RHOA/CFL1/RPS3/ITGAV/TLN1/CD44/RDX/ACTR3/CTNNA1/IGF2BP1/IQGAP1/CTNND1/CDC42/GSN/S100A11/NME2/NME1/EPS8L2/CORO1C/ARPC2/BAIAP2/RAC1/DCTN1/APP/S100A6/CDH2/VASP/ITGA5/PXN/SLC9A3R1/VAMP7/PTK2/MYH10/ACTR2/GABRG3/ARPC5/SNX5/MYADM	48
CC	GO:0031300	intrinsic component of organelle membrane	29/1317	193/18698	8.6964e-05	0.000377622	0.000221173	TOMM40/IMMT/RAB5C/TOMM22/TIMM17A/APOO/CPT1A/TOMM20/CHCHD3/BID/AGK/IER3IP1/LAMP2/STX6/C19orf70/FIS1/ECE1/COA3/LBR/MFF/MPC1/RER1/RAB11B/L2HGDH/MINOS1/SYPL1/GALNT2/TOMM7/VAMP7	29
CC	GO:0071007	U2-type catalytic step 2 spliceosome	9/1317	29/18698	0.000114377	0.000493346	0.000288953	SRRM2/SNRPD1/SNRPE/SNRPD2/PRPF19/SNRPB2/SNRPB/AQR/SNRPD3	9
CC	GO:0045239	tricarboxylic acid cycle enzyme complex	6/1317	13/18698	0.000134567	0.000576587	0.000337706	DLD/FH/OGDH/DLST/SUCLG2/MRPS36	6
CC	GO:0042581	specific granule	25/1317	160/18698	0.000138866	0.000591093	0.000346203	CTSD/CKAP4/ITGAV/PGRMC1/ERP44/VCL/B2M/HMOX2/JUP/KPNB1/CD59/ILF2/MLEC/ACAA1/SNAP23/SCAMP1/SPTAN1/VAMP8/CNN2/LAMTOR1/RAP2B/TOM1/LAMTOR3/ADAM10/CEP290	25
CC	GO:0098562	cytoplasmic side of membrane	29/1317	199/18698	0.000150611	0.000636897	0.00037303	EEF1A1/G6PD/EEF1A2/GNB1/EZR/ATP2A2/RHOA/GNAI2/IQGAP1/GNAS/DIABLO/RPL27/JUP/GNAI3/GNA11/HM13/GNG12/RPS26/RPS28/PTPN1/S100A6/ESYT2/DLG1/GNG5/RAB21/HIP1/RPS29/PTK2/SNX5	29
CC	GO:0042641	actomyosin	14/1317	66/18698	0.000166814	0.000700835	0.000410478	ACTN4/ACTN1/ACTC1/FSCN1/FLNB/DBN1/SEPT9/CNN2/TPM3/SEPT7/PXN/LIMA1/PTK2/MYH10	14
CC	GO:0005911	cell-cell junction	52/1317	440/18698	0.000168052	0.000701483	0.000410858	AHNAK/ACTN4/FLNA/ANXA2/KRT8/KRT18/ACTN1/ITGB1/FSCN1/ATP1A1/RAP1B/RHOA/CFL1/VCL/RDX/ACTR3/CTNNA1/IQGAP1/RAB10/CTNND1/VAPA/CDC42/PPP1CA/JUP/PAK4/YWHAH/S100A11/MTDH/PARK7/YBX3/DBN1/SNAP23/BAIAP2/CNN2/ANXA1/TJP1/APP/CDH2/DSP/VASP/F11R/CLIC4/NECTIN2/ATP1B1/ITGA5/EIF4G2/DLG1/RAP2B/LIN7A/PTK7/MYADM/CNKSR1	52
CC	GO:0005802	trans-Golgi network	29/1317	202/18698	0.000195938	0.000812641	0.000475963	CLTC/AP2B1/NUCB1/IGF2R/LAP3/RAB10/VAMP3/GOLPH3/AP1B1/CLTA/RAB14/RAB6A/STX6/SCAMP1/AP1G1/RAB8A/CORO7/CHID1/RAC1/DPY30/APP/CLTB/TGOLN2/ATXN2/RAB21/RAB32/M6PR/VAMP7/TMEM230	29
CC	GO:0098687	chromosomal region	43/1317	347/18698	0.000215565	0.000888346	0.000520304	HNRNPA2B1/XRCC6/HNRNPU/XRCC5/PPP1CA/PARP1/PTGES3/ALYREF/XPO1/SSB/H3F3A/H3F3B/HIST1H4I/HIST1H4A/HIST1H4D/HIST1H4F/HIST1H4K/HIST1H4J/HIST1H4C/HIST1H4H/HIST1H4B/HIST1H4E/HIST1H4L/HIST2H4A/HIST4H4/HIST2H4B/SEPT2/RANGAP1/MCM3/DCTN1/DYNC1LI1/RPA2/DPY30/BUB3/UPF1/SEPT7/PHF6/DCTN2/KIF2C/CBX3/PPP1R12A/PCNA/PPP1R10	43
CC	GO:0036020	endolysosome membrane	6/1317	14/18698	0.000221467	0.000901188	0.000527825	CLTC/AP2B1/AP2A2/CLTA/LDLR/AP2A1	6
CC	GO:0098554	cytoplasmic side of endoplasmic reticulum membrane	6/1317	14/18698	0.000221467	0.000901188	0.000527825	RPL27/HM13/RPS26/RPS28/PTPN1/RPS29	6
CC	GO:0044291	cell-cell contact zone	14/1317	68/18698	0.000232676	0.000940882	0.000551074	AHNAK/ACTN1/ITGB1/ATP1A1/VCL/CTNNA1/JUP/YWHAH/CDH2/DSP/NECTIN2/ATP1B1/DLG1/RAP2B	14
CC	GO:0016607	nuclear speck	46/1317	381/18698	0.000241166	0.000969159	0.000567636	HSPA1A/HSPA1B/TKT/CKAP4/BASP1/HNRNPU/TIMM50/DDX3X/ACADM/PCBP1/SRRM2/DDX39B/DDX17/SRSF1/U2AF2/ALYREF/SFPQ/SRSF6/DDX39A/NONO/U2AF1/U2AF1L5/SF3A3/SRSF3/THRAP3/SRRM1/SF3A1/LUC7L3/SRSF2/ATXN2L/SRSF10/RBM4/PRPF19/DHX15/LMNA/SNRNP70/SARNP/HP1BP3/SNRPB2/LHPP/NDUFB1/ERBIN/PSPC1/SRP54/TRIP11/RBM39	46
CC	GO:0101003	ficolin-1-rich granule membrane	13/1317	61/18698	0.000269167	0.00107501	0.00062963	RHOA/LGALS3/AP2A2/ARL8A/LAMP1/COPB1/LAMP2/PRCP/ATP6AP2/RAC1/DYNC1LI1/LAMTOR1/DSP	13
CC	GO:0031304	intrinsic component of mitochondrial inner membrane	10/1317	39/18698	0.000279788	0.0011038	0.000646493	IMMT/TIMM17A/APOO/CHCHD3/AGK/C19orf70/COA3/MPC1/L2HGDH/MINOS1	10
CC	GO:0031305	integral component of mitochondrial inner membrane	10/1317	39/18698	0.000279788	0.0011038	0.000646493	IMMT/TIMM17A/APOO/CHCHD3/AGK/C19orf70/COA3/MPC1/L2HGDH/MINOS1	10
CC	GO:0031301	integral component of organelle membrane	26/1317	177/18698	0.00028469	0.00111633	0.000653834	TOMM40/IMMT/TOMM22/TIMM17A/APOO/CPT1A/TOMM20/CHCHD3/BID/AGK/IER3IP1/LAMP2/STX6/C19orf70/FIS1/COA3/LBR/MFF/MPC1/RER1/L2HGDH/MINOS1/SYPL1/GALNT2/TOMM7/VAMP7	26
CC	GO:0030027	lamellipodium	27/1317	187/18698	0.000291743	0.0011371	0.000665996	CTTN/ACTC1/ITGB1/FSCN1/RHOA/CFL1/ITGAV/CD44/RDX/ACTR3/CTNNA1/IGF2BP1/CTNND1/GSN/NME2/CORO1C/ARPC2/RAC1/APP/CDH2/VASP/PXN/VAMP7/PTK2/MYH10/ACTR2/ARPC5	27
CC	GO:0001725	stress fiber	12/1317	54/18698	0.000304537	0.00117283	0.000686926	ACTN4/ACTN1/FSCN1/FLNB/SEPT9/CNN2/TPM3/SEPT7/PXN/LIMA1/PTK2/MYH10	12
CC	GO:0097517	contractile actin filament bundle	12/1317	54/18698	0.000304537	0.00117283	0.000686926	ACTN4/ACTN1/FSCN1/FLNB/SEPT9/CNN2/TPM3/SEPT7/PXN/LIMA1/PTK2/MYH10	12
CC	GO:0043202	lysosomal lumen	17/1317	95/18698	0.000313451	0.00120002	0.000702849	HSPA8/CTSD/PSAP/TXNDC5/HSP90AA1/TPP1/CTSA/CTSB/NPC2/HEXB/LAMP2/GNS/CHID1/GBA/LGMN/IFI30/SGSH	17
CC	GO:0005785	signal recognition particle receptor complex	5/1317	10/18698	0.00032128	0.00120854	0.000707839	SRP9/SRPRB/DERL2/SRPRA/DERL1	5
CC	GO:0005916	fascia adherens	5/1317	10/18698	0.00032128	0.00120854	0.000707839	ACTN1/VCL/JUP/CDH2/DSP	5
CC	GO:0034098	VCP-NPL4-UFD1 AAA ATPase complex	5/1317	10/18698	0.00032128	0.00120854	0.000707839	VCP/CAV1/NPLOC4/FAF2/DERL1	5
CC	GO:0097525	spliceosomal snRNP complex	13/1317	63/18698	0.000376291	0.00140729	0.000824246	DDX39B/SNRPD1/SNRPE/SF3A1/LUC7L3/SNRPD2/SNRPC/LSM7/SNRNP70/SNRPB2/SNRNP200/SNRPB/SNRPD3	13
CC	GO:0005686	U2 snRNP	7/1317	21/18698	0.000408767	0.00151996	0.000890238	SNRPD1/SNRPE/SF3A1/SNRPD2/SNRPB2/SNRPB/SNRPD3	7
CC	GO:0030175	filopodium	17/1317	98/18698	0.000457524	0.00169153	0.000990729	MSN/ACTC1/ITGB1/EZR/FSCN1/ITGAV/RDX/IGF2BP1/CDC42/ITGA3/BAIAP2/DYNC1H1/UTRN/APP/VASP/AP2A1/SLC9A3R1	17
CC	GO:0071437	invadopodium	6/1317	16/18698	0.000522469	0.00192067	0.00112493	MSN/ITGB1/EZR/FSCN1/ITGA3/ACTR2	6
CC	GO:0014704	intercalated disc	11/1317	50/18698	0.000589505	0.00215486	0.0012621	ACTN1/ITGB1/ATP1A1/VCL/CTNNA1/JUP/YWHAH/CDH2/DSP/ATP1B1/DLG1	11
CC	GO:0005782	peroxisomal matrix	10/1317	43/18698	0.000652089	0.00235699	0.00138049	CAT/PRDX5/HSD17B4/SCP2/ACOX1/AGPS/ACAA1/GRHPR/ABCD3/NUDT12	10
CC	GO:0031907	microbody lumen	10/1317	43/18698	0.000652089	0.00235699	0.00138049	CAT/PRDX5/HSD17B4/SCP2/ACOX1/AGPS/ACAA1/GRHPR/ABCD3/NUDT12	10
CC	GO:0030864	cortical actin cytoskeleton	14/1317	75/18698	0.000667192	0.00239819	0.00140462	EEF1A1/KRT19/CFL1/RDX/GSN/CAP1/DSTN/SPTAN1/UTRN/CDH2/EPB41L2/HIP1/ACTR2/MYADM	14
CC	GO:0005769	early endosome	40/1317	334/18698	0.00069868	0.00249749	0.00146278	HSPD1/ANXA2/PHB/TFRC/PRDX3/NUCB1/IGF2R/APOE/RAB5C/EHD1/RAB1A/B2M/TM9SF4/CAV1/ATP6V0D1/WASHC2A/SNX3/TICAM2/RAB14/RHOB/STX7/STX6/LDLR/VPS29/PTPN1/VAMP8/MMGT1/WASHC3/ANXA1/DERL2/WDFY1/RAB21/PICALM/TOM1/RAB32/DERL1/STX12/TMEM230/SNX5/USP10	40
CC	GO:0033178	proton-transporting two-sector ATPase complex, catalytic domain	6/1317	17/18698	0.00075957	0.00270023	0.00158152	ATP5F1B/ATP5F1A/ATP5F1C/ATP5F1D/ATP5F1E/ATP6V1A	6
CC	GO:0030131	clathrin adaptor complex	8/1317	30/18698	0.000856212	0.00302715	0.001773	AP2B1/AP2A2/AP1B1/AP1G1/AP2A1/PICALM/AP3M1/HIP1	8
CC	GO:0008540	proteasome regulatory particle, base subcomplex	5/1317	12/18698	0.000896165	0.00315119	0.00184565	PSMC5/PSMC4/PSMC6/PSMD4/PSMC3	5
CC	GO:0022624	proteasome accessory complex	7/1317	24/18698	0.00100948	0.00353044	0.00206777	PSME2/PSMC5/PSMC4/PSMC6/PSMD4/PSMD8/PSMC3	7
CC	GO:0030658	transport vesicle membrane	27/1317	203/18698	0.00106481	0.00370394	0.00216939	CLTC/RAB5C/TMED10/RAB1A/DNM1L/B2M/LMAN1/CLTA/SEC22B/CD59/SAR1A/MCFD2/TMED2/SEC31A/STX6/SCAMP1/AP1G1/SYNGR2/CLTB/SEC24C/RAB11B/VMA21/AP2A1/SYPL1/SEC24B/TPRG1L/VAMP7	27
CC	GO:0071004	U2-type prespliceosome	6/1317	18/18698	0.00107189	0.00370863	0.00217214	U2AF2/SF3A1/LUC7L3/LSM7/SNRNP70/SNRPB	6
CC	GO:0030532	small nuclear ribonucleoprotein complex	13/1317	70/18698	0.00107838	0.00371124	0.00217367	DDX39B/SNRPD1/SNRPE/SF3A1/LUC7L3/SNRPD2/SNRPC/LSM7/SNRNP70/SNRPB2/SNRNP200/SNRPB/SNRPD3	13
CC	GO:0012507	ER to Golgi transport vesicle membrane	12/1317	62/18698	0.00113824	0.00389653	0.00228219	TMED10/B2M/LMAN1/SEC22B/CD59/SAR1A/MCFD2/TMED2/SEC31A/SEC24C/VMA21/SEC24B	12
CC	GO:0032154	cleavage furrow	11/1317	54/18698	0.001166	0.00397055	0.00232555	ITGB1/RHOA/RHOC/RDX/RHOB/SEPT2/RALA/SEPT7/LIMA1/RAB21/MYH10	11
CC	GO:0005744	mitochondrial inner membrane presequence translocase complex	5/1317	13/18698	0.00137216	0.00462391	0.00270822	TIMM50/SLC25A6/GRPEL1/TIMM17A/TIMM10	5
CC	GO:0030130	clathrin coat of trans-Golgi network vesicle	5/1317	13/18698	0.00137216	0.00462391	0.00270822	CLTC/CLTA/AP1G1/CLTB/AP2A1	5
CC	GO:0055038	recycling endosome membrane	13/1317	72/18698	0.0014135	0.0047385	0.00277534	PDIA3/EHD1/RAB10/B2M/VAMP3/RAB14/SCAMP1/RAB8A/RAC1/VAMP8/RAB11B/RAP2B/STX12	13
CC	GO:0043034	costamere	6/1317	19/18698	0.00147399	0.00491582	0.00287919	AHNAK/KRT8/KRT19/VCL/AHNAK2/PLEC	6
CC	GO:0042383	sarcolemma	19/1317	128/18698	0.00157018	0.00520978	0.00305137	AHNAK/ANXA2/KRT8/KRT19/ITGB1/BSG/EZR/ATP1A1/VCL/RDX/CAV1/AHNAK2/LAMP1/ANXA1/UTRN/PLEC/CDH2/ATP1B1/DLG1	19
CC	GO:0001772	immunological synapse	8/1317	33/18698	0.0016817	0.00555131	0.0032514	STOML2/EZR/ICAM1/LGALS3/CD81/STX7/ALCAM/DLG1	8
CC	GO:0005776	autophagosome	15/1317	92/18698	0.00184861	0.00607133	0.00355598	HSPA8/RPN2/RAB7A/VMP1/SQSTM1/LAMP1/LAMP2/SH3GLB1/UBQLN2/RAB23/RALB/FTH1/PIK3C3/TMEM230/CALCOCO2	15
CC	GO:0070382	exocytic vesicle	25/1317	190/18698	0.00185958	0.00607651	0.003559	VDAC1/VDAC2/RAB5C/RAB10/DNM1L/ATP6V0D1/CLTA/LAMP1/RAB6A/STX6/SCAMP1/RAB8A/VAMP8/TOR1A/SYNGR2/MFF/CLTB/RAB11B/PICALM/GIPC1/SYPL1/TPRG1L/STON2/VAMP7/TMEM230	25
CC	GO:0005767	secondary lysosome	5/1317	14/18698	0.00201144	0.00650701	0.00381115	SQSTM1/LAMP1/LAMP2/FTH1/PIK3C3	5
CC	GO:0030122	AP-2 adaptor complex	5/1317	14/18698	0.00201144	0.00650701	0.00381115	AP2B1/AP2A2/AP2A1/PICALM/HIP1	5
CC	GO:0019897	extrinsic component of plasma membrane	23/1317	171/18698	0.00207841	0.00669022	0.00391846	ANXA2/STOML2/GNB1/ATP2A2/RHOA/GNAI2/MFGE8/CTNNA1/IQGAP1/GNAS/JUP/GNAI3/GNA11/GNG12/S100A10/ANXA1/S100A6/CDH2/ESYT2/GNG5/HIP1/PTK2/SNX5	23
CC	GO:0005838	proteasome regulatory particle	6/1317	21/18698	0.00261043	0.00831995	0.00487299	PSMC5/PSMC4/PSMC6/PSMD4/PSMD8/PSMC3	6
CC	GO:0035145	exon-exon junction complex	6/1317	21/18698	0.00261043	0.00831995	0.00487299	SRSF1/ALYREF/THRAP3/UPF1/MAGOHB/R3HCC1L	6
CC	GO:0031965	nuclear membrane	35/1317	304/18698	0.00283652	0.00893105	0.00523091	LRPPRC/GAPDH/MYOF/YBX1/ZMPSTE24/MATR3/SLC16A3/VAPA/DHCR7/XPO1/KPNB1/CLIC1/MTDH/HACD3/TOR1AIP1/TOR1AIP2/EMD/RANGAP1/KPNA4/TOR1A/NDUFB4/LBR/SDCBP/CERS2/LMNA/MRPS23/JPT1/MRPL19/RANBP2/ERBIN/CBX3/TRA2B/TMEM43/CEP70/TMEM109	35
CC	GO:0012510	trans-Golgi network transport vesicle membrane	5/1317	15/18698	0.00284358	0.00893105	0.00523091	CLTC/CLTA/AP1G1/CLTB/AP2A1	5
CC	GO:0030128	clathrin coat of endocytic vesicle	5/1317	15/18698	0.00284358	0.00893105	0.00523091	AP2B1/AP2A2/AP2A1/PICALM/HIP1	5
CC	GO:0016363	nuclear matrix	16/1317	106/18698	0.00299297	0.00935483	0.00547912	KRT8/HNRNPA2B1/PHB2/HNRNPU/CFL1/RUVBL1/MATR3/DDX39B/HNRNPM/RUVBL2/SFPQ/NONO/PSMA6/SRRM1/CLIC4/PSPC1	16
CC	GO:0008021	synaptic vesicle	23/1317	176/18698	0.00301906	0.00939101	0.00550031	VDAC1/VDAC2/RAB5C/RAB10/DNM1L/ATP6V0D1/CLTA/LAMP1/STX6/SCAMP1/RAB8A/VAMP8/TOR1A/SYNGR2/MFF/CLTB/RAB11B/GIPC1/SYPL1/TPRG1L/STON2/VAMP7/TMEM230	23
CC	GO:0005770	late endosome	29/1317	240/18698	0.00312107	0.00966189	0.00565896	HSPA8/ANXA2/RAB7A/IGF2R/TPT1/SDF4/ARL8A/SQSTM1/LAMP1/TICAM2/RAB14/RHOB/STX7/LAMP2/LDLR/VPS29/CHID1/VAMP8/LGMN/LAMTOR1/LAMTOR5/DERL2/LAMTOR3/M6PR/DERL1/VAMP7/PIK3C3/RNF128/TMEM230	29
MF	GO:0003735	structural constituent of ribosome	114/1290	162/17548	6.85411e-92	6.01105e-89	4.81231e-89	RPL4/RPLP0/RPLP2/RPSA/RPL3/RPL7A/RPL9/RPL7/RPS4X/RPS3A/RPL15/RPS3/RPL6/RPS8/RPL10/RPS17/RPL23A/RPL5/RPL12/RPS2/RPL21/MRPL12/RPS19/RPS7/RPL8/RPL22/RPL27A/RPS27A/RPL19/RPS5/RPS18/RPL18A/RPS14/MRPS31/RPL23/RPL13/RPL14/RPS10/RPL27/MRPL1/RPL28/RPLP1/RPL30/RPS12/RPS11/RPL24/RPS16/RPS23/RPS6/RPS13/RPL18/RPL17/RPS15/RPL36/RPL31/RPL13A/MRPL10/RPL26/RPS9/RPL37A/RPL35/MRPL4/MRPL28/MRPS17/MRPL41/DAP3/RPS26/M…	114
MF	GO:0045296	cadherin binding	126/1290	324/17548	2.36386e-59	1.03655e-56	8.29839e-57	AHNAK/HSPA5/FLNA/PKM/EEF2/HSPA8/ANXA2/ENO1/ALDOA/HSPA1A/KTN1/SND1/HSP90AB1/KRT18/HNRNPK/PRDX1/CTTN/ITGB1/BSG/EZR/RTN4/RPL7A/YWHAZ/LDHA/FSCN1/YWHAB/HDLBP/RPL15/DDX3X/RUVBL1/TAGLN2/GCN1/RPL6/LRRC59/FASN/MAPRE1/SERBP1/TLN1/FLNB/YWHAE/RACK1/VCL/RDX/RPL23A/EEF1G/RPS2/PCBP1/CTNNA1/PAICS/EHD1/IQGAP1/PLIN3/RAB10/CTNND1/RAB1A/EEF1D/CCT8/VAPA/RPL14/PPP1CA/SFN/RAN/JUP/PFN1/PAK4/RPL24/DDX6/BZW1/S100A11/EIF4H…	126
MF	GO:0050839	cell adhesion molecule binding	144/1290	489/17548	3.13652e-50	9.16909e-48	7.34055e-48	AHNAK/ACTN4/HSPA5/FLNA/PKM/EEF2/P4HB/HSPA8/CALR/ANXA2/ENO1/ALDOA/HSPA1A/KTN1/SND1/HSP90AB1/KRT18/ACTN1/HNRNPK/PRDX1/MSN/CTTN/ITGB1/BSG/EZR/RTN4/RPL7A/YWHAZ/LDHA/FSCN1/YWHAB/HMGB1/ICAM1/HDLBP/RPL15/DDX3X/RUVBL1/TAGLN2/GCN1/RPL6/LRRC59/ITGAV/FASN/MAPRE1/SERBP1/TLN1/FLNB/YWHAE/RACK1/VCL/RDX/RPL23A/EEF1G/RPS2/MFGE8/PCBP1/CTNNA1/PAICS/EHD1/IQGAP1/PLIN3/RAB10/CTNND1/RAB1A/EEF1D/CCT8/VAPA/RPL14/PPP1CA/S…	144
MF	GO:0009055	electron transfer activity	46/1290	114/17548	4.62693e-23	1.01445e-20	8.12148e-21	ETFA/DLD/UQCRC1/SDHA/POR/P4HA2/COX5A/UQCRFS1/COX6B1/ASPH/ETFB/ME2/NDUFS3/CYC1/UGDH/COX5B/COX4I1/C15orf48/IDH3B/UQCRB/NDUFS1/UQCRH/COX2/ALDH4A1/NDUFV2/CYCS/SDHB/PTGES2/COX7A2/COX6A1/NDUFAF2/SH3BGRL3/UQCRQ/COX7A2L/UQCR10/GLRX5/COX7C/NDUFS2/CYB5A/TXNRD1/COX7B/NDUFA12/NDUFS6/NDUFA4/COX6C/COX3	46
MF	GO:0051082	unfolded protein binding	44/1290	122/17548	7.79524e-20	1.36728e-17	1.09462e-17	HSPD1/HSPA5/HYOU1/HSP90B1/HSPA9/HSPA8/CALR/CANX/HSPA1A/HSPA1B/NPM1/HSP90AB1/TUBB4B/PPIA/CCT7/HSP90AA1/PPIB/SERPINH1/TRAP1/CCT4/CCT2/CCT3/GRPEL1/UGGT1/TCP1/HSPE1/CCT6A/CCT8/RUVBL2/PTGES3/DNAJB11/LMAN1/DNAJA2/TOMM20/HSPA4/CCT5/ST13/CCDC115/NAP1L4/TOR1A/SRSF10/TAPBP/ERLEC1/DNAJB1	44
MF	GO:0008137	NADH dehydrogenase (ubiquinone) activity	26/1290	46/17548	3.52454e-18	4.41574e-16	3.53514e-16	NDUFA5/NDUFS3/NDUFA8/NDUFAB1/NDUFB10/NDUFS1/NDUFV1/NDUFA10/NDUFA9/NDUFV2/NDUFA2/NDUFAF2/NDUFB7/NDUFB4/NDUFS8/NDUFS2/NDUFS5/NDUFC2/NDUFA12/NDUFS6/NDUFA3/NDUFB3/NDUFB1/NDUFA4/NDUFB9/NDUFA13	26
MF	GO:0050136	NADH dehydrogenase (quinone) activity	26/1290	46/17548	3.52454e-18	4.41574e-16	3.53514e-16	NDUFA5/NDUFS3/NDUFA8/NDUFAB1/NDUFB10/NDUFS1/NDUFV1/NDUFA10/NDUFA9/NDUFV2/NDUFA2/NDUFAF2/NDUFB7/NDUFB4/NDUFS8/NDUFS2/NDUFS5/NDUFC2/NDUFA12/NDUFS6/NDUFA3/NDUFB3/NDUFB1/NDUFA4/NDUFB9/NDUFA13	26
MF	GO:0050662	coenzyme binding	66/1290	279/17548	7.92307e-18	8.68567e-16	6.95354e-16	HADHA/G6PD/GAPDH/OAT/CAT/P4HA1/IDH2/ETFA/DLD/AIFM1/ACAT1/SDHA/PLOD2/SHMT2/GLUD1/POR/OGDH/LDHA/P4HA2/ALDH1B1/GOT2/FASN/SCP2/ACADM/ME2/HIBADH/ACADVL/ACOX1/P3H1/UGDH/IDH3A/PARP1/DHCR7/ALB/NNT/CYB5R3/ILVBL/IDH3B/NDUFV1/DECR1/HADH/P3H2/NDUFA9/AGPS/CRYZ/PLOD1/ACAD9/SIRT3/SPTLC1/ACADSB/IVD/LDHB/HMGCL/GRHPR/ME3/CHDH/GCDH/CTBP1/MDH1/DBI/SPTLC2/P4HTM/NDUFS2/IDH3G/TXNRD1/ACOT7	66
MF	GO:0003954	NADH dehydrogenase activity	26/1290	48/17548	1.49051e-17	1.45242e-15	1.16277e-15	NDUFA5/NDUFS3/NDUFA8/NDUFAB1/NDUFB10/NDUFS1/NDUFV1/NDUFA10/NDUFA9/NDUFV2/NDUFA2/NDUFAF2/NDUFB7/NDUFB4/NDUFS8/NDUFS2/NDUFS5/NDUFC2/NDUFA12/NDUFS6/NDUFA3/NDUFB3/NDUFB1/NDUFA4/NDUFB9/NDUFA13	26
MF	GO:0048037	cofactor binding	92/1290	490/17548	3.4272e-17	3.00566e-15	2.40626e-15	HADHA/G6PD/GAPDH/OAT/TKT/CAT/P4HA1/IDH2/ETFA/DLD/AIFM1/SQOR/ACAT1/SDHA/PLOD2/SHMT2/GLUD1/ACO2/POR/OGDH/LDHA/P4HA2/RPS3/UQCRFS1/HMOX1/CYB5B/ALDH1B1/GOT2/FASN/SCP2/PGRMC1/ACADM/ME2/HIBADH/ACADVL/ACOX1/CYC1/P3H1/UGDH/IDH3A/HMOX2/NDUFAB1/PARP1/DHCR7/ALB/NNT/CYB5R3/ILVBL/IDH3B/NDUFS1/NDUFV1/DECR1/HADH/P3H2/NDUFA9/CISD1/AGPS/CRYZ/NDUFV2/PLOD1/SUCLG1/ACAD9/SIRT3/CYCS/SDHB/SPTLC1/ACADSB/IVD/PGRMC2/PTGES2…	92
MF	GO:0019843	rRNA binding	28/1290	59/17548	8.17105e-17	6.51456e-15	5.2154e-15	EEF2/CAVIN1/RPL3/RPL9/RPS4X/RPS3/RPL23A/RPL5/RPL12/RPL8/DDX21/RPS5/RPS18/RPS14/RPL23/RPS11/RPS13/RPS9/MRPS17/MRPS27/RPL11/MRPL11/PTCD3/MRPS11/MRPL20/MRPS7/MRPS6/EMG1	28
MF	GO:0043021	ribonucleoprotein complex binding	39/1290	120/17548	5.84203e-16	4.26955e-14	3.4181e-14	HSPA5/EEF2/RPN2/NPM1/EIF5A/RPSA/HNRNPU/TIMM50/C1QBP/DDX3X/GCN1/SRP72/RACK1/ETF1/EIF4B/PPP1CA/EIF4H/ABCE1/EIF6/NME1/SNRPD1/MRPS27/SRP9/SRP68/LETM1/EIF2S1/SEC61A1/CSNK2A1/DDX5/EIF3K/SRPRB/PTCD3/SRP19/SNRNP70/PHF6/SNRPB2/SRP54/SRPRA/SNRPD3	39
MF	GO:0016655	oxidoreductase activity, acting on NAD(P)H, quinone or similar compound as acceptor	27/1290	60/17548	1.56405e-15	1.05513e-13	8.44712e-14	NDUFA5/NDUFS3/NDUFA8/NDUFAB1/NDUFB10/NDUFS1/NDUFV1/NDUFA10/NDUFA9/CRYZ/NDUFV2/NDUFA2/NDUFAF2/NDUFB7/NDUFB4/NDUFS8/NDUFS2/NDUFS5/NDUFC2/NDUFA12/NDUFS6/NDUFA3/NDUFB3/NDUFB1/NDUFA4/NDUFB9/NDUFA13	27
MF	GO:0016651	oxidoreductase activity, acting on NAD(P)H	37/1290	113/17548	2.49126e-15	1.5606e-13	1.24938e-13	DLD/AIFM1/PGK1/POR/PRDX3/NDUFA5/NDUFS3/NDUFA8/NDUFAB1/NNT/CYB5R3/NDUFB10/NDUFS1/NDUFV1/DECR1/NDUFA10/NDUFA9/CRYZ/NDUFV2/NDUFA2/TXN/NDUFAF2/NDUFB7/NDUFB4/NDUFS8/NDUFS2/NDUFS5/TXNRD1/NDUFC2/NDUFA12/NDUFS6/NDUFA3/NDUFB3/NDUFB1/NDUFA4/NDUFB9/NDUFA13	37
MF	GO:0008135	translation factor activity, RNA binding	32/1290	89/17548	9.36077e-15	5.47293e-13	4.3815e-13	EEF2/EEF1A1/TUFM/EEF1A2/EIF5A/GCN1/EIF4A1/EEF1G/ETF1/EEF1D/TSFM/EIF4B/GFM1/EIF4H/EEF1B2/EIF2S3/EIF6/EIF3A/MCTS1/EIF3H/EIF2S1/EIF3K/EIF4G1/GSPT1/EIF3G/GATB/EIF3B/EIF4E/EIF4G2/EIF3I/EIF5/EIF3J	32
MF	GO:0051287	NAD binding	25/1290	57/17548	3.65563e-14	2.00374e-12	1.60415e-12	HADHA/GAPDH/IDH2/DLD/GLUD1/LDHA/ALDH1B1/ME2/HIBADH/UGDH/IDH3A/PARP1/NNT/CYB5R3/IDH3B/NDUFV1/HADH/SIRT3/LDHB/GRHPR/ME3/CTBP1/MDH1/NDUFS2/IDH3G	25
MF	GO:0048027	mRNA 5'-UTR binding	16/1290	23/17548	9.96354e-14	5.14001e-12	4.11497e-12	NCL/RPS3A/DDX3X/RPL5/IGF2BP3/IGF2BP2/RPS7/IGF2BP1/RPS14/RPS13/RPL26/CCT5/LARP1/MRPS11/RSL1D1/MYH10	16
MF	GO:0003725	double-stranded RNA binding	26/1290	66/17548	2.46947e-13	1.20318e-11	9.63239e-12	HSPD1/CLTC/VIM/HSP90AB1/TUBB4B/ACTN1/MSN/TUBA1B/TFRC/HNRNPU/DDX3X/EIF4A1/DDX21/DDX1/EIF4B/EIF4H/MTDH/ILF2/SLC3A2/PRKRA/LRRFIP1/DHX15/MRPL44/ILF3/STAU1/DDX60	26
MF	GO:0032550	purine ribonucleoside binding	70/1290	374/17548	2.71626e-13	1.25377e-11	1.00374e-11	EEF2/EEF1A1/TUBB/HSP90AB1/TUBB4B/TUFM/EEF1A2/TUBA1B/TUBA1C/GLUD1/RAB7A/ATL3/RAP1B/RHOA/RHOC/GNAI2/RAB1B/OPA1/RAB5C/EHD1/GNAS/SUCLG2/RAB10/RAB1A/DNM1L/RHOG/NRAS/CDC42/RAN/NOLC1/RAB2A/ARL8A/GNAI3/ARF3/GFM1/GNA11/EIF2S3/NME1/DAP3/SAR1A/RAB14/RHOB/RRAS2/SEPT9/RAB6A/SEPT2/ARF5/SRPRB/RAB8A/RAC1/RAB23/RALA/DYNC1LI1/RAB34/OLA1/GSPT1/RAB18/SEPT7/RAB11B/RALB/NUDT16/RAP2B/RAB21/EIF5/SRP54/SRPRA/RAB32/AK4/RN…	70
MF	GO:0001882	nucleoside binding	71/1290	385/17548	3.88341e-13	1.69521e-11	1.35714e-11	ACTN4/EEF2/EEF1A1/TUBB/HSP90AB1/TUBB4B/TUFM/EEF1A2/TUBA1B/TUBA1C/GLUD1/RAB7A/ATL3/RAP1B/RHOA/RHOC/GNAI2/RAB1B/OPA1/RAB5C/EHD1/GNAS/SUCLG2/RAB10/RAB1A/DNM1L/RHOG/NRAS/CDC42/RAN/NOLC1/RAB2A/ARL8A/GNAI3/ARF3/GFM1/GNA11/EIF2S3/NME1/DAP3/SAR1A/RAB14/RHOB/RRAS2/SEPT9/RAB6A/SEPT2/ARF5/SRPRB/RAB8A/RAC1/RAB23/RALA/DYNC1LI1/RAB34/OLA1/GSPT1/RAB18/SEPT7/RAB11B/RALB/NUDT16/RAP2B/RAB21/EIF5/SRP54/SRPRA/RAB32/…	71
MF	GO:0001883	purine nucleoside binding	70/1290	377/17548	4.05922e-13	1.69521e-11	1.35714e-11	EEF2/EEF1A1/TUBB/HSP90AB1/TUBB4B/TUFM/EEF1A2/TUBA1B/TUBA1C/GLUD1/RAB7A/ATL3/RAP1B/RHOA/RHOC/GNAI2/RAB1B/OPA1/RAB5C/EHD1/GNAS/SUCLG2/RAB10/RAB1A/DNM1L/RHOG/NRAS/CDC42/RAN/NOLC1/RAB2A/ARL8A/GNAI3/ARF3/GFM1/GNA11/EIF2S3/NME1/DAP3/SAR1A/RAB14/RHOB/RRAS2/SEPT9/RAB6A/SEPT2/ARF5/SRPRB/RAB8A/RAC1/RAB23/RALA/DYNC1LI1/RAB34/OLA1/GSPT1/RAB18/SEPT7/RAB11B/RALB/NUDT16/RAP2B/RAB21/EIF5/SRP54/SRPRA/RAB32/AK4/RN…	70
MF	GO:0032549	ribonucleoside binding	70/1290	378/17548	4.63525e-13	1.81428e-11	1.45247e-11	EEF2/EEF1A1/TUBB/HSP90AB1/TUBB4B/TUFM/EEF1A2/TUBA1B/TUBA1C/GLUD1/RAB7A/ATL3/RAP1B/RHOA/RHOC/GNAI2/RAB1B/OPA1/RAB5C/EHD1/GNAS/SUCLG2/RAB10/RAB1A/DNM1L/RHOG/NRAS/CDC42/RAN/NOLC1/RAB2A/ARL8A/GNAI3/ARF3/GFM1/GNA11/EIF2S3/NME1/DAP3/SAR1A/RAB14/RHOB/RRAS2/SEPT9/RAB6A/SEPT2/ARF5/SRPRB/RAB8A/RAC1/RAB23/RALA/DYNC1LI1/RAB34/OLA1/GSPT1/RAB18/SEPT7/RAB11B/RALB/NUDT16/RAP2B/RAB21/EIF5/SRP54/SRPRA/RAB32/AK4/RN…	70
MF	GO:0003924	GTPase activity	60/1290	297/17548	4.75809e-13	1.81428e-11	1.45247e-11	EEF2/EEF1A1/TUBB/TUBB4B/TUFM/EEF1A2/TUBA1B/TUBA1C/GNB1/RAB7A/ATL3/GNB2/RAP1B/RHOA/DDX3X/RHOC/GNAI2/RAB1B/OPA1/RAB5C/GNAS/RAB10/RAB1A/DNM1L/RHOG/NRAS/CDC42/RAN/RAB2A/ARL8A/GNAI3/ARF3/GFM1/GNA11/EIF2S3/RAB14/RHOB/RRAS2/SEPT9/RAB6A/SEPT2/ARF5/RAB8A/RAC1/RAB23/RALA/RAB34/GSPT1/RAB18/SEPT7/RAB11B/RALB/GNG5/RAP2B/RAB21/EIF5/SRP54/SRPRA/RAB32/AGAP2	60
MF	GO:0005525	GTP binding	69/1290	371/17548	5.52317e-13	2.01826e-11	1.61577e-11	EEF2/EEF1A1/TUBB/HSP90AB1/TUBB4B/TUFM/EEF1A2/TUBA1B/TUBA1C/GLUD1/RAB7A/ATL3/RAP1B/RHOA/RHOC/GNAI2/RAB1B/OPA1/RAB5C/EHD1/GNAS/SUCLG2/RAB10/RAB1A/DNM1L/RHOG/NRAS/CDC42/RAN/NOLC1/RAB2A/ARL8A/GNAI3/ARF3/GFM1/GNA11/EIF2S3/NME1/DAP3/SAR1A/RAB14/RHOB/RRAS2/SEPT9/RAB6A/SEPT2/ARF5/SRPRB/RAB8A/RAC1/RAB23/RALA/RAB34/OLA1/GSPT1/RAB18/SEPT7/RAB11B/RALB/NUDT16/RAP2B/RAB21/EIF5/SRP54/SRPRA/RAB32/AK4/RNGTT/AGAP2	69
MF	GO:0032561	guanyl ribonucleotide binding	70/1290	391/17548	2.46625e-12	8.6516e-11	6.92626e-11	EEF2/EEF1A1/TUBB/HSP90AB1/TUBB4B/TUFM/EEF1A2/TUBA1B/TUBA1C/GLUD1/RAB7A/ATL3/RAP1B/RHOA/RHOC/GNAI2/RAB1B/OPA1/RAB5C/EHD1/GNAS/SUCLG2/RAB10/RAB1A/DNM1L/RHOG/NRAS/CDC42/RAN/NOLC1/RAB2A/ARL8A/GNAI3/ARF3/GFM1/GNA11/EIF2S3/NME1/DAP3/SAR1A/RAB14/RHOB/RRAS2/SEPT9/RAB6A/SEPT2/ARF5/SRPRB/RAB8A/RAC1/RAB23/RALA/DYNC1LI1/RAB34/OLA1/GSPT1/RAB18/SEPT7/RAB11B/RALB/NUDT16/RAP2B/RAB21/EIF5/SRP54/SRPRA/RAB32/AK4/RN…	70
MF	GO:0019001	guanyl nucleotide binding	70/1290	392/17548	2.79347e-12	9.4226e-11	7.54351e-11	EEF2/EEF1A1/TUBB/HSP90AB1/TUBB4B/TUFM/EEF1A2/TUBA1B/TUBA1C/GLUD1/RAB7A/ATL3/RAP1B/RHOA/RHOC/GNAI2/RAB1B/OPA1/RAB5C/EHD1/GNAS/SUCLG2/RAB10/RAB1A/DNM1L/RHOG/NRAS/CDC42/RAN/NOLC1/RAB2A/ARL8A/GNAI3/ARF3/GFM1/GNA11/EIF2S3/NME1/DAP3/SAR1A/RAB14/RHOB/RRAS2/SEPT9/RAB6A/SEPT2/ARF5/SRPRB/RAB8A/RAC1/RAB23/RALA/DYNC1LI1/RAB34/OLA1/GSPT1/RAB18/SEPT7/RAB11B/RALB/NUDT16/RAP2B/RAB21/EIF5/SRP54/SRPRA/RAB32/AK4/RN…	70
MF	GO:0015078	proton transmembrane transporter activity	35/1290	130/17548	8.70369e-12	2.82709e-10	2.2633e-10	ATP5F1B/ATP5F1A/ATP5PB/ATP2A2/ATP5PO/COX5A/COX6B1/ATP5PD/ATP5PF/ATP5F1C/SLC25A3/ATP5F1D/COX5B/COX4I1/NNT/C15orf48/ATP6V0D1/COX2/ATP5MG/SLC25A22/ATP5ME/LETM1/COX7A2/COX6A1/COX7A2L/COX7C/CYB5A/COX7B/ATP8/ATP5F1E/ATP6/ATP6V1A/NDUFA4/COX6C/COX3	35
MF	GO:0016675	oxidoreductase activity, acting on a heme group of donors	16/1290	29/17548	1.80463e-11	5.65235e-10	4.52513e-10	POR/COX5A/COX6B1/COX5B/COX4I1/C15orf48/COX2/COX7A2/COX6A1/COX7A2L/COX7C/CYB5A/COX7B/NDUFA4/COX6C/COX3	16
MF	GO:0016614	oxidoreductase activity, acting on CH-OH group of donors	35/1290	138/17548	5.45542e-11	1.64979e-09	1.32079e-09	HADHA/G6PD/HSD17B10/IDH2/MDH2/HADHB/LDHA/HSD17B4/NSDHL/FASN/ME2/HIBADH/UGDH/IDH3A/GPD2/IDH3B/HADH/AGPS/PGD/LDHB/GRHPR/ME3/HSD17B12/CHDH/CTBP1/MDH1/CYB5A/IDH3G/VKORC1/ZADH2/L2HGDH/VKORC1L1/RDH14/HSD17B11/RDH13	35
MF	GO:0016887	ATPase activity	74/1290	457/17548	8.41827e-11	2.46094e-09	1.97017e-09	HSPD1/ATP5F1B/HSPA5/HYOU1/HSPA9/VCP/HSPA8/HSPA1A/HSPA1B/ATP5F1A/ACTC1/XRCC6/ATP5PB/HSP90AA1/XRCC5/LONP1/ATP2A2/ATP1A1/ATP5PO/DDX3X/RUVBL1/EIF4A1/ATP5PD/ATP5PF/DDX21/DDX39B/ATP5F1C/DDX17/DDX1/CCT8/ATP5F1D/NSF/RUVBL2/G3BP1/DDX6/ATP6V0D1/ABCE1/PSMC5/ATP5MG/HSPA4/PSMC4/DDX39A/ATP5ME/CLPB/MYL6/PCYOX1/ATP5MF/DDX5/RBBP4/TOR1A/OLA1/TAPBP/DYNC1H1/ANXA1/ATP8/ABCB7/ATP1B3/UPF1/DHX15/MTREX/PSMC6/ABCD3/ATP5F1…	74
MF	GO:0016667	oxidoreductase activity, acting on a sulfur group of donors	22/1290	61/17548	1.31914e-10	3.54304e-09	2.83647e-09	PDIA4/PDIA3/P4HB/PDIA6/DLD/SQOR/PGK1/ERO1A/PRDX3/TMX1/PDIA5/PTGES2/TXNDC12/PCYOX1/TMX3/TXN/SH3BGRL3/GSTK1/CHCHD4/GLRX5/TXNRD1/IFI30	22
MF	GO:0004129	cytochrome-c oxidase activity	15/1290	28/17548	1.37358e-10	3.54304e-09	2.83647e-09	COX5A/COX6B1/COX5B/COX4I1/C15orf48/COX2/COX7A2/COX6A1/COX7A2L/COX7C/CYB5A/COX7B/NDUFA4/COX6C/COX3	15
MF	GO:0015002	heme-copper terminal oxidase activity	15/1290	28/17548	1.37358e-10	3.54304e-09	2.83647e-09	COX5A/COX6B1/COX5B/COX4I1/C15orf48/COX2/COX7A2/COX6A1/COX7A2L/COX7C/CYB5A/COX7B/NDUFA4/COX6C/COX3	15
MF	GO:0016676	oxidoreductase activity, acting on a heme group of donors, oxygen as acceptor	15/1290	28/17548	1.37358e-10	3.54304e-09	2.83647e-09	COX5A/COX6B1/COX5B/COX4I1/C15orf48/COX2/COX7A2/COX6A1/COX7A2L/COX7C/CYB5A/COX7B/NDUFA4/COX6C/COX3	15
MF	GO:0044183	protein binding involved in protein folding	18/1290	42/17548	2.26101e-10	5.66545e-09	4.53563e-09	HSPD1/HSPA5/HYOU1/HSPA9/HSPA8/CALR/HSPA1A/HSPA1B/CCT7/HSPB1/CCT4/CCT2/CCT3/TCP1/CCT6A/CCT8/HSPA4/CCT5	18
MF	GO:0003727	single-stranded RNA binding	24/1290	80/17548	1.48596e-09	3.61996e-08	2.89805e-08	PTBP1/PABPC1/HNRNPU/HNRNPA1/LONP1/HNRNPH1/DDX3X/PABPC4/HNRNPF/SYNCRIP/DDX1/EIF4B/HNRNPC/U2AF2/KHDRBS1/EIF4H/SSB/DAZAP1/PNPT1/SNRPC/RBMX/ANXA1/TRA2B/DDX60	24
MF	GO:0019003	GDP binding	20/1290	59/17548	3.2061e-09	7.59933e-08	6.08384e-08	RAB7A/RAP1B/RHOA/RAB5C/SUCLG2/RAB10/RAN/RAB2A/GNAI3/RAB14/RHOB/RAB8A/RALA/DYNC1LI1/RAB18/RAB11B/RALB/RAP2B/RAB21/SRP54	20
MF	GO:0016860	intramolecular oxidoreductase activity	18/1290	49/17548	4.49717e-09	1.0379e-07	8.30917e-08	PDIA4/PDIA3/P4HB/ECH1/PDIA6/TXNDC5/ERO1A/ERP44/ECI1/TPI1/PTGES3/TMX1/PDIA5/PTGES2/EBP/TMX3/MIF/GPI	18
MF	GO:0003730	mRNA 3'-UTR binding	21/1290	66/17548	4.80267e-09	1.07998e-07	8.6461e-08	HNRNPA2B1/PABPC1/HNRNPU/SERBP1/RPL5/IGF2BP3/IGF2BP2/RPS7/IGF2BP1/TARDBP/HNRNPC/CRYZ/HNRNPR/YBX3/CCT5/LARP1/KHSRP/DDX5/HNRNPD/RBM4/RSL1D1	21
MF	GO:0003743	translation initiation factor activity	18/1290	51/17548	9.42558e-09	2.06656e-07	1.65444e-07	EIF4A1/EIF4B/EIF4H/EIF2S3/EIF6/EIF3A/MCTS1/EIF3H/EIF2S1/EIF3K/EIF4G1/EIF3G/EIF3B/EIF4E/EIF4G2/EIF3I/EIF5/EIF3J	18
MF	GO:0016616	oxidoreductase activity, acting on the CH-OH group of donors, NAD or NADP as acceptor	29/1290	121/17548	9.72566e-09	2.08034e-07	1.66547e-07	HADHA/G6PD/HSD17B10/IDH2/MDH2/HADHB/LDHA/HSD17B4/NSDHL/FASN/ME2/HIBADH/UGDH/IDH3A/IDH3B/HADH/PGD/LDHB/GRHPR/ME3/HSD17B12/CTBP1/MDH1/CYB5A/IDH3G/ZADH2/RDH14/HSD17B11/RDH13	29
MF	GO:0016627	oxidoreductase activity, acting on the CH-CH group of donors	19/1290	58/17548	1.50814e-08	3.14914e-07	2.52113e-07	SDHA/FASN/ACADM/ACADVL/ACOX1/DHCR7/DECR1/ACAD9/SDHB/ACADSB/IVD/ACAA1/GCDH/BLVRA/CPOX/LBR/DECR2/ZADH2/TECR	19
MF	GO:0003729	mRNA binding	62/1290	401/17548	1.77615e-08	3.62253e-07	2.90011e-07	CALR/NCL/HNRNPA2B1/PABPC1/HNRNPU/C1QBP/RPL7/RPS3A/RPS3/DDX3X/PABPC4/EIF4A1/SERBP1/RPL5/IGF2BP3/RPS2/PCBP1/IGF2BP2/RPS7/IGF2BP1/ETF1/SRSF1/HNRNPM/RPS5/RPS14/HNRNPAB/TARDBP/HNRNPC/G3BP1/RPS13/RPL13A/GRSF1/CRYZ/RPL26/RPL35/HNRNPR/PARK7/RPS26/EIF3A/YBX3/SSB/SRSF3/CCT5/LARP1/KHSRP/LUC7L3/DDX5/G3BP2/HNRNPD/RBMX/NUDT21/RBM4/EIF4G1/MRPS11/SNRNP70/NUDT16/ZC3H15/MRPS7/TRA2B/RSL1D1/MYH10/MRPL13	62
MF	GO:0036002	pre-mRNA binding	15/1290	37/17548	1.82475e-08	3.63706e-07	2.91174e-07	PTBP1/HNRNPA2B1/HNRNPU/HNRNPA1/HNRNPL/U2AF2/SF1/SRSF6/U2AF1/U2AF1L5/DDX5/SRSF2/SNRPC/RBM4/TRA2B	15
MF	GO:0043022	ribosome binding	18/1290	53/17548	1.89478e-08	3.69272e-07	2.9563e-07	HSPA5/EEF2/RPN2/EIF5A/RPSA/C1QBP/GCN1/SRP72/RACK1/ETF1/EIF6/MRPS27/SRP68/LETM1/EIF2S1/SEC61A1/EIF3K/SRP19	18
MF	GO:0015036	disulfide oxidoreductase activity	16/1290	43/17548	2.6271e-08	5.00863e-07	4.00979e-07	PDIA4/PDIA3/P4HB/PDIA6/PGK1/ERO1A/TMX1/PDIA5/PTGES2/TXNDC12/TXN/SH3BGRL3/GSTK1/CHCHD4/GLRX5/TXNRD1	16
MF	GO:0042623	ATPase activity, coupled	59/1290	380/17548	3.37527e-08	6.29812e-07	5.04212e-07	ATP5F1B/HSPA5/HYOU1/HSPA9/HSPA8/HSPA1A/HSPA1B/ATP5F1A/XRCC6/ATP5PB/XRCC5/LONP1/ATP2A2/ATP1A1/ATP5PO/DDX3X/RUVBL1/EIF4A1/ATP5PD/DDX21/DDX39B/ATP5F1C/DDX17/DDX1/CCT8/ATP5F1D/NSF/RUVBL2/G3BP1/DDX6/ATP6V0D1/PSMC5/ATP5MG/HSPA4/PSMC4/DDX39A/MYL6/PCYOX1/DDX5/RBBP4/TAPBP/DYNC1H1/ANXA1/ABCB7/ATP1B3/UPF1/DHX15/MTREX/PSMC6/ABCD3/ATP5F1E/ATP1B1/TAP1/ATP6V1A/PSMC3/DHX16/MYH10/SNRNP200/ABCA3	59
MF	GO:0031625	ubiquitin protein ligase binding	50/1290	309/17548	1.01239e-07	1.84973e-06	1.48085e-06	HSPD1/HSPA5/HSPA9/VCP/HSPA8/CALR/LRPPRC/HSPA1A/HSPA1B/TUBB/UQCRC1/TUBA1B/RTN4/YWHAZ/XRCC5/CCT2/PCBP2/YWHAE/SLC25A5/VCL/RPL5/PA2G4/TCP1/TPI1/CACYBP/DNM1L/RPS27A/RPL23/TRIM28/NPLOC4/FAF2/ERLIN1/HM13/PRKAR2A/SQSTM1/SCAMP3/RPL11/BID/UBE2N/SUMO2/RANGAP1/UBE2L3/RALA/RPA2/NDUFS2/GPI/RALB/PXN/ELOB/DERL1	50
MF	GO:0016853	isomerase activity	31/1290	149/17548	1.03537e-07	1.8531e-06	1.48355e-06	PDIA4/PDIA3/P4HB/ECH1/PDIA6/PPIA/TXNDC5/ERO1A/PPIB/HSD17B4/ERP44/ECI1/TPI1/FKBP10/FKBP2/PTGES3/PGAM1/FKBP8/FKBP3/TMX1/PDIA5/PIN4/PTGES2/EBP/TMX3/MIF/NAXE/GPI/FKBP9/RANBP2/PPIF	31
MF	GO:0044389	ubiquitin-like protein ligase binding	51/1290	323/17548	1.67296e-07	2.93437e-06	2.34919e-06	HSPD1/HSPA5/HSPA9/VCP/HSPA8/CALR/LRPPRC/HSPA1A/HSPA1B/TUBB/UQCRC1/TUBA1B/RTN4/YWHAZ/XRCC5/CCT2/PCBP2/YWHAE/SLC25A5/VCL/RPL5/PA2G4/TCP1/TPI1/CACYBP/DNM1L/RPS27A/RPL23/TRIM28/NPLOC4/FAF2/ERLIN1/HM13/PRKAR2A/SQSTM1/SCAMP3/RPL11/BID/UBE2N/SUMO2/RANGAP1/UBE2L3/RALA/RPA2/NDUFS2/GPI/DDRGK1/RALB/PXN/ELOB/DERL1	51
MF	GO:0008187	poly-pyrimidine tract binding	11/1290	23/17548	1.92367e-07	3.30795e-06	2.64827e-06	PTBP1/PABPC1/HNRNPU/HNRNPH1/PABPC4/HNRNPC/U2AF2/KHDRBS1/SSB/DAZAP1/PNPT1	11
MF	GO:0003746	translation elongation factor activity	10/1290	20/17548	4.15683e-07	6.75101e-06	5.40469e-06	EEF2/EEF1A1/TUFM/EEF1A2/EIF5A/EEF1G/EEF1D/TSFM/GFM1/EEF1B2	10
MF	GO:0003756	protein disulfide isomerase activity	10/1290	20/17548	4.15683e-07	6.75101e-06	5.40469e-06	PDIA4/PDIA3/P4HB/PDIA6/TXNDC5/ERO1A/ERP44/TMX1/PDIA5/TMX3	10
MF	GO:0016864	intramolecular oxidoreductase activity, transposing S-S bonds	10/1290	20/17548	4.15683e-07	6.75101e-06	5.40469e-06	PDIA4/PDIA3/P4HB/PDIA6/TXNDC5/ERO1A/ERP44/TMX1/PDIA5/TMX3	10
MF	GO:0004298	threonine-type endopeptidase activity	10/1290	21/17548	7.41223e-07	1.16081e-05	9.29315e-06	PSMA7/PSMB6/PSMA6/PSMA2/PSMB7/PSMA1/PSMB2/PSMB4/PSMA4/PSMA5	10
MF	GO:0070003	threonine-type peptidase activity	10/1290	21/17548	7.41223e-07	1.16081e-05	9.29315e-06	PSMA7/PSMB6/PSMA6/PSMA2/PSMB7/PSMA1/PSMB2/PSMB4/PSMA4/PSMA5	10
MF	GO:0046933	proton-transporting ATP synthase activity, rotational mechanism	9/1290	17/17548	8.6324e-07	1.32818e-05	1.06331e-05	ATP5F1B/ATP5F1A/ATP5PB/ATP5PO/ATP5PD/ATP5F1C/ATP5F1D/ATP5MG/ATP5F1E	9
MF	GO:0044548	S100 protein binding	8/1290	14/17548	1.67893e-06	2.53866e-05	2.03239e-05	AHNAK/ANXA2/EZR/ATP2A2/IQGAP1/CACYBP/S100A11/S100A6	8
MF	GO:0070717	poly-purine tract binding	10/1290	23/17548	2.09773e-06	3.11815e-05	2.49632e-05	PABPC1/HNRNPU/DDX3X/PABPC4/SYNCRIP/DDX1/KHDRBS1/DAZAP1/PNPT1/TRA2B	10
MF	GO:0005200	structural constituent of cytoskeleton	23/1290	107/17548	2.48019e-06	3.62522e-05	2.90226e-05	ACTB/VIM/KRT9/TUBB/KRT2/KRT19/TUBB4B/MSN/TUBA1B/TUBA1C/TLN1/ACTR3/KRT5/ARPC2/ARPC4/SPTAN1/DSP/ARPC1B/EPB41L2/ERBIN/HIP1/ACTR2/ARPC5	23
MF	GO:0042288	MHC class I protein binding	9/1290	19/17548	2.86559e-06	4.11987e-05	3.29827e-05	ATP5F1B/VCP/ATP5F1A/TUBB/TUBB4B/BCAP31/TAPBP/TAP1/DERL1	9
MF	GO:0015399	primary active transmembrane transporter activity	25/1290	125/17548	3.69237e-06	5.22291e-05	4.18134e-05	ATP5F1B/ATP5F1A/ATP5PB/ATP2A2/ATP1A1/ATP5PO/ATP5PD/ATP5F1C/ATP5F1D/TIMM17A/ATP6V0D1/TOMM20/ATP5MG/PCYOX1/TAPBP/SEC61B/ABCB7/ATP1B3/ABCD3/ATP5F1E/ATP1B1/TAP1/ATP6V1A/COX3/ABCA3	25
MF	GO:0016874	ligase activity	29/1290	159/17548	4.474e-06	6.22809e-05	4.98606e-05	ACAT1/IARS2/MTHFD1/SARS2/PAICS/SUCLG2/MCCC2/PARP1/GARS/TRIM25/QARS/SUCLG1/ATP5IF1/GMPS/RTCB/CTPS1/ACSL3/FARSA/VARS/EPRS/GART/LRRC47/SUCLA2/GATB/YARS/FARSB/KARS/NARS2/DARS	29
MF	GO:0016408	C-acyltransferase activity	9/1290	20/17548	4.87006e-06	6.67351e-05	5.34265e-05	HADHA/ACAT1/HADHB/SCP2/ACAA2/SPTLC1/ACAA1/ACAT2/SPTLC2	9
MF	GO:0003995	acyl-CoA dehydrogenase activity	8/1290	16/17548	6.29563e-06	8.49426e-05	6.8003e-05	ACADM/ACADVL/ACOX1/ACAD9/ACADSB/IVD/GCDH/TECR	8
MF	GO:0003779	actin binding	55/1290	410/17548	1.02256e-05	0.000131894	0.000105591	ACTN4/FLNA/EEF2/ALDOA/ACTN1/MSN/ITGB1/EZR/HNRNPU/FSCN1/CFL1/TLN1/FLNB/VCL/RDX/ACTR3/MARCKS/CTNNA1/GSN/PFN1/YWHAH/CAP1/DSTN/DBN1/EPS8L2/CAPZB/CAPZA1/MARCKSL1/CORO1C/ARPC2/CAPZA2/EMD/ARPC4/CORO7/SPTAN1/CNN2/COTL1/UTRN/PLEC/MYPN/VASP/PLS3/TPM3/ARPC1B/EPB41L2/ARPC5L/LIMA1/GIPC1/HIP1/PTK2/MYH10/ACTR2/ARPC5/NEB/LIMCH1	55
MF	GO:0015405	P-P-bond-hydrolysis-driven transmembrane transporter activity	24/1290	124/17548	1.03333e-05	0.000131894	0.000105591	ATP5F1B/ATP5F1A/ATP5PB/ATP2A2/ATP1A1/ATP5PO/ATP5PD/ATP5F1C/ATP5F1D/TIMM17A/ATP6V0D1/TOMM20/ATP5MG/PCYOX1/TAPBP/SEC61B/ABCB7/ATP1B3/ABCD3/ATP5F1E/ATP1B1/TAP1/ATP6V1A/ABCA3	24
MF	GO:0004812	aminoacyl-tRNA ligase activity	13/1290	44/17548	1.03771e-05	0.000131894	0.000105591	IARS2/SARS2/GARS/QARS/FARSA/VARS/EPRS/LRRC47/YARS/FARSB/KARS/NARS2/DARS	13
MF	GO:0016875	ligase activity, forming carbon-oxygen bonds	13/1290	44/17548	1.03771e-05	0.000131894	0.000105591	IARS2/SARS2/GARS/QARS/FARSA/VARS/EPRS/LRRC47/YARS/FARSB/KARS/NARS2/DARS	13
MF	GO:0015037	peptide disulfide oxidoreductase activity	7/1290	13/17548	1.32012e-05	0.000165392	0.000132409	PDIA4/PDIA3/P4HB/PDIA6/PDIA5/TXNDC12/TXN	7
MF	GO:0051087	chaperone binding	20/1290	96/17548	1.80223e-05	0.000222614	0.000178219	HSPD1/HSPA5/HYOU1/CALR/OGDH/ATP1A1/ERP29/GRPEL1/HSPE1/DNAJC3/ALB/PTGES3/STIP1/DNAJA2/TIMM44/TIMM9/ST13/DNAJB1/BAG2/TIMM10	20
MF	GO:0098631	cell adhesion mediator activity	12/1290	40/17548	1.90932e-05	0.000229943	0.000184087	ANXA2/KRT18/ITGB1/RPSA/RAB10/PPP1CA/JUP/PAK4/S100A11/BAIAP2/ANXA1/DSP	12
MF	GO:0044769	ATPase activity, coupled to transmembrane movement of ions, rotational mechanism	11/1290	34/17548	1.91401e-05	0.000229943	0.000184087	ATP5F1B/ATP5F1A/ATP5PB/ATP5PO/ATP5PD/ATP5F1C/ATP5F1D/ATP6V0D1/ATP5MG/ATP5F1E/ATP6V1A	11
MF	GO:0043024	ribosomal small subunit binding	7/1290	14/17548	2.47235e-05	0.000284636	0.000227873	NPM1/DDX3X/EIF4B/EIF4H/ABCE1/NME1/PTCD3	7
MF	GO:0004576	oligosaccharyl transferase activity	6/1290	10/17548	2.53154e-05	0.000284636	0.000227873	RPN1/RPN2/DDOST/DAD1/STT3A/OSTC	6
MF	GO:0008121	ubiquinol-cytochrome-c reductase activity	6/1290	10/17548	2.53154e-05	0.000284636	0.000227873	UQCRC1/UQCRFS1/UQCRB/UQCRH/UQCRQ/UQCR10	6
MF	GO:0016681	oxidoreductase activity, acting on diphenols and related substances as donors, cytochrome as acceptor	6/1290	10/17548	2.53154e-05	0.000284636	0.000227873	UQCRC1/UQCRFS1/UQCRB/UQCRH/UQCRQ/UQCR10	6
MF	GO:0017166	vinculin binding	6/1290	10/17548	2.53154e-05	0.000284636	0.000227873	ACTN1/TLN1/CTNNA1/RTCB/UTRN/PXN	6
MF	GO:0043531	ADP binding	11/1290	35/17548	2.60683e-05	0.000289391	0.000231679	PKM/VCP/GLUD1/LONP1/ATP1A1/RUVBL1/ATP5F1D/RUVBL2/CYB5R3/TAP1/MYH10	11
MF	GO:0000062	fatty-acyl-CoA binding	8/1290	19/17548	3.0273e-05	0.000323365	0.000258878	HADHA/SCP2/ACADVL/ACAD9/HMGCL/GCDH/DBI/ACOT7	8
MF	GO:0008266	poly(U) RNA binding	8/1290	19/17548	3.0273e-05	0.000323365	0.000258878	PABPC1/HNRNPH1/PABPC4/HNRNPC/KHDRBS1/SSB/DAZAP1/PNPT1	8
MF	GO:0098641	cadherin binding involved in cell-cell adhesion	8/1290	19/17548	3.0273e-05	0.000323365	0.000258878	ANXA2/KRT18/RAB10/PPP1CA/PAK4/S100A11/BAIAP2/ANXA1	8
MF	GO:0048029	monosaccharide binding	16/1290	69/17548	3.06035e-05	0.000323365	0.000258878	ALDOA/G6PD/P4HA1/PLOD2/BSG/P4HA2/IGF2R/P3H1/HK1/LMAN1/LMAN2/P3H2/PLOD1/P4HTM/GPI/M6PR	16
MF	GO:0098632	cell-cell adhesion mediator activity	10/1290	31/17548	4.72164e-05	0.000492961	0.000394653	ANXA2/KRT18/RAB10/PPP1CA/JUP/PAK4/S100A11/BAIAP2/ANXA1/DSP	10
MF	GO:0016679	oxidoreductase activity, acting on diphenols and related substances as donors	6/1290	11/17548	5.22188e-05	0.000538775	0.000431331	UQCRC1/UQCRFS1/UQCRB/UQCRH/UQCRQ/UQCR10	6
MF	GO:0051015	actin filament binding	28/1290	174/17548	6.97372e-05	0.000711157	0.000569335	ACTN4/FLNA/EEF2/ACTN1/EZR/FSCN1/CFL1/TLN1/ACTR3/MARCKS/CTNNA1/GSN/DSTN/CAPZB/CORO1C/ARPC2/ARPC4/UTRN/MYPN/PLS3/TPM3/ARPC1B/ARPC5L/LIMA1/HIP1/MYH10/ACTR2/ARPC5	28
MF	GO:0008143	poly(A) binding	7/1290	16/17548	7.22803e-05	0.000720339	0.000576686	PABPC1/HNRNPU/DDX3X/PABPC4/SYNCRIP/DDX1/KHDRBS1	7
MF	GO:0023026	MHC class II protein complex binding	7/1290	16/17548	7.22803e-05	0.000720339	0.000576686	PKM/HSPA8/HSP90AB1/HSP90AA1/YWHAE/CD81/ATP1B1	7
MF	GO:0008026	ATP-dependent helicase activity	19/1290	98/17548	8.18399e-05	0.000789908	0.000632381	XRCC6/XRCC5/DDX3X/RUVBL1/EIF4A1/DDX21/DDX39B/DDX17/DDX1/RUVBL2/G3BP1/DDX6/DDX39A/DDX5/UPF1/DHX15/MTREX/DHX16/SNRNP200	19
MF	GO:0070035	purine NTP-dependent helicase activity	19/1290	98/17548	8.18399e-05	0.000789908	0.000632381	XRCC6/XRCC5/DDX3X/RUVBL1/EIF4A1/DDX21/DDX39B/DDX17/DDX1/RUVBL2/G3BP1/DDX6/DDX39A/DDX5/UPF1/DHX15/MTREX/DHX16/SNRNP200	19
MF	GO:0004004	ATP-dependent RNA helicase activity	15/1290	67/17548	8.28637e-05	0.000789908	0.000632381	DDX3X/EIF4A1/DDX21/DDX39B/DDX17/DDX1/G3BP1/DDX6/DDX39A/DDX5/UPF1/DHX15/MTREX/DHX16/SNRNP200	15
MF	GO:0019829	cation-transporting ATPase activity	15/1290	67/17548	8.28637e-05	0.000789908	0.000632381	ATP5F1B/ATP5F1A/ATP5PB/ATP2A2/ATP1A1/ATP5PO/ATP5PD/ATP5F1C/ATP5F1D/ATP6V0D1/ATP5MG/ATP1B3/ATP5F1E/ATP1B1/ATP6V1A	15
MF	GO:0051787	misfolded protein binding	9/1290	27/17548	8.48465e-05	0.000800112	0.00064055	HSPA5/HYOU1/HSPA9/HSPA8/HSPA1A/HSPA1B/DNAJC3/HSPA4/TOR1A	9
MF	GO:0003724	RNA helicase activity	15/1290	68/17548	9.91814e-05	0.00089621	0.000717484	DDX3X/EIF4A1/DDX21/DDX39B/DDX17/DDX1/G3BP1/DDX6/DDX39A/DDX5/UPF1/DHX15/MTREX/DHX16/SNRNP200	15
MF	GO:0008186	RNA-dependent ATPase activity	15/1290	68/17548	9.91814e-05	0.00089621	0.000717484	DDX3X/EIF4A1/DDX21/DDX39B/DDX17/DDX1/G3BP1/DDX6/DDX39A/DDX5/UPF1/DHX15/MTREX/DHX16/SNRNP200	15
MF	GO:0022853	active ion transmembrane transporter activity	15/1290	68/17548	9.91814e-05	0.00089621	0.000717484	ATP5F1B/ATP5F1A/ATP5PB/ATP2A2/ATP1A1/ATP5PO/ATP5PD/ATP5F1C/ATP5F1D/ATP6V0D1/ATP5MG/ATP1B3/ATP5F1E/ATP1B1/ATP6V1A	15
MF	GO:0042625	ATPase coupled ion transmembrane transporter activity	15/1290	68/17548	9.91814e-05	0.00089621	0.000717484	ATP5F1B/ATP5F1A/ATP5PB/ATP2A2/ATP1A1/ATP5PO/ATP5PD/ATP5F1C/ATP5F1D/ATP6V0D1/ATP5MG/ATP1B3/ATP5F1E/ATP1B1/ATP6V1A	15
MF	GO:0042626	ATPase activity, coupled to transmembrane movement of substances	21/1290	116/17548	0.000100147	0.00089621	0.000717484	ATP5F1B/ATP5F1A/ATP5PB/ATP2A2/ATP1A1/ATP5PO/ATP5PD/ATP5F1C/ATP5F1D/ATP6V0D1/ATP5MG/PCYOX1/TAPBP/ABCB7/ATP1B3/ABCD3/ATP5F1E/ATP1B1/TAP1/ATP6V1A/ABCA3	21
MF	GO:0008320	protein transmembrane transporter activity	7/1290	17/17548	0.000115089	0.00101953	0.000816211	TOMM40/TOMM70/TOMM22/TIMM17A/TOMM20/SEC61B/TOMM7	7
MF	GO:1904680	peptide transmembrane transporter activity	9/1290	28/17548	0.000116925	0.00102544	0.00082094	TOMM40/TOMM70/TOMM22/TIMM17A/TOMM20/TAPBP/SEC61B/TAP1/TOMM7	9
MF	GO:0050660	flavin adenine dinucleotide binding	16/1290	79/17548	0.000171794	0.00147709	0.00118252	ETFA/DLD/AIFM1/SDHA/POR/ACADM/ACADVL/ACOX1/CYB5R3/AGPS/ACAD9/ACADSB/IVD/CHDH/GCDH/TXNRD1	16
MF	GO:0051117	ATPase binding	16/1290	79/17548	0.000171794	0.00147709	0.00118252	EZR/RUVBL1/RDX/RUVBL2/CAV1/ATP5IF1/TOR1AIP1/TOR1AIP2/RAC1/RALA/FBL/ATP1B3/RALB/DNAJB1/ATP1B1/DERL1	16
MF	GO:0070182	DNA polymerase binding	7/1290	18/17548	0.000176407	0.00150203	0.00120249	HSP90AB1/HSP90AA1/LONP1/HMGB1/PTGES3/PCNA/FANCI	7
MF	GO:0022884	macromolecule transmembrane transporter activity	7/1290	19/17548	0.000261652	0.00220643	0.00176642	TOMM40/TOMM70/TOMM22/TIMM17A/TOMM20/SEC61B/TOMM7	7
MF	GO:0001618	virus receptor activity	15/1290	74/17548	0.000268957	0.00221577	0.00177389	HSPA1A/HSPA1B/ITGB1/TFRC/RPSA/ICAM1/ITGAV/ANPEP/LAMP1/CD81/LDLR/ITGB5/F11R/NECTIN2/ITGA5	15
MF	GO:0104005	hijacked molecular function	15/1290	74/17548	0.000268957	0.00221577	0.00177389	HSPA1A/HSPA1B/ITGB1/TFRC/RPSA/ICAM1/ITGAV/ANPEP/LAMP1/CD81/LDLR/ITGB5/F11R/NECTIN2/ITGA5	15
MF	GO:0004386	helicase activity	24/1290	151/17548	0.000270339	0.00221577	0.00177389	XRCC6/XRCC5/DDX3X/RUVBL1/EIF4A1/DDX21/DDX39B/DDX17/DDX1/EIF4B/RUVBL2/G3BP1/DDX6/EIF4H/DDX39A/DDX5/MCM3/ANXA1/UPF1/DHX15/MTREX/DHX16/DDX60/SNRNP200	24
MF	GO:0015035	protein disulfide oxidoreductase activity	8/1290	25/17548	0.000290943	0.00231961	0.00185702	ERO1A/PTGES2/TXN/SH3BGRL3/GSTK1/CHCHD4/GLRX5/TXNRD1	8
MF	GO:0017025	TBP-class protein binding	8/1290	25/17548	0.000290943	0.00231961	0.00185702	RUVBL1/HNRNPF/RUVBL2/PSMC5/PSMC4/CAND1/PSMC6/PSMC3	8
MF	GO:1901567	fatty acid derivative binding	8/1290	25/17548	0.000290943	0.00231961	0.00185702	HADHA/SCP2/ACADVL/ACAD9/HMGCL/GCDH/DBI/ACOT7	8
MF	GO:0008565	protein transporter activity	17/1290	91/17548	0.000303218	0.00239465	0.0019171	TOMM40/TOMM70/TIMM13/TOMM22/TIMM17A/XPO1/KPNB1/TOMM20/TIMM9/KPNA1/KPNA2/VPS29/KPNA4/SEC61B/TOMM7/TOMM5/TIMM10	17
MF	GO:0016829	lyase activity	27/1290	180/17548	0.000305816	0.00239465	0.0019171	ENO1/ALDOA/HADHA/ECHS1/ACAT1/HADHB/FH/SHMT2/ACO2/XRCC6/XRCC5/HSD17B4/APMAP/HMGB1/RPS3/FASN/ALDOC/ECI1/ME2/PAICS/HCCS/PARK7/HACD3/PTGES2/HMGCL/ME3/MGST3	27
MF	GO:0016209	antioxidant activity	16/1290	84/17548	0.000359393	0.00278927	0.00223302	CAT/PRDX1/PRDX4/PRDX5/PRDX3/APOE/SOD2/ALB/PARK7/TXN/GSTK1/GSTP1/MGST3/TXNRD1/FAM213A/PRDX2	16
MF	GO:0023023	MHC protein complex binding	7/1290	20/17548	0.000377122	0.00287596	0.00230243	PKM/HSPA8/HSP90AB1/HSP90AA1/YWHAE/CD81/ATP1B1	7
MF	GO:0031418	L-ascorbic acid binding	7/1290	20/17548	0.000377122	0.00287596	0.00230243	P4HA1/PLOD2/P4HA2/P3H1/P3H2/PLOD1/P4HTM	7
MF	GO:0016628	oxidoreductase activity, acting on the CH-CH group of donors, NAD or NADP as acceptor	8/1290	26/17548	0.000393365	0.0029545	0.0023653	FASN/DHCR7/DECR1/BLVRA/LBR/DECR2/ZADH2/TECR	8
MF	GO:0003755	peptidyl-prolyl cis-trans isomerase activity	10/1290	39/17548	0.000394158	0.0029545	0.0023653	PPIA/PPIB/FKBP10/FKBP2/FKBP8/FKBP3/PIN4/FKBP9/RANBP2/PPIF	10
MF	GO:0043492	ATPase activity, coupled to movement of substances	21/1290	129/17548	0.000458532	0.00340791	0.00272829	ATP5F1B/ATP5F1A/ATP5PB/ATP2A2/ATP1A1/ATP5PO/ATP5PD/ATP5F1C/ATP5F1D/ATP6V0D1/ATP5MG/PCYOX1/TAPBP/ABCB7/ATP1B3/ABCD3/ATP5F1E/ATP1B1/TAP1/ATP6V1A/ABCA3	21
MF	GO:0050750	low-density lipoprotein particle receptor binding	7/1290	21/17548	0.000530004	0.003906	0.00312705	HSP90B1/CLTC/APOE/MESD/AP2A1/PICALM/LRPAP1	7
MF	GO:0042287	MHC protein binding	9/1290	34/17548	0.000594478	0.00434464	0.00347822	ATP5F1B/VCP/ATP5F1A/TUBB/TUBB4B/BCAP31/TAPBP/TAP1/DERL1	9
MF	GO:0016859	cis-trans isomerase activity	10/1290	41/17548	0.000607512	0.00440321	0.0035251	PPIA/PPIB/FKBP10/FKBP2/FKBP8/FKBP3/PIN4/FKBP9/RANBP2/PPIF	10
MF	GO:0000049	tRNA binding	12/1290	56/17548	0.000637972	0.00458608	0.0036715	EEF1A1/HSD17B10/IARS2/MRPS27/SSB/RPL35A/FARSA/AIMP1/TRMT1L/YARS/KARS/TRMT10C	12
MF	GO:0016835	carbon-oxygen lyase activity	14/1290	72/17548	0.000662976	0.00472708	0.00378438	ENO1/HADHA/ECHS1/HADHB/FH/ACO2/XRCC6/XRCC5/HSD17B4/RPS3/FASN/ECI1/PARK7/HACD3	14
MF	GO:0035615	clathrin adaptor activity	5/1290	11/17548	0.000676068	0.00474329	0.00379737	AP2B1/AP2A2/AP2A1/PICALM/HIP1	5
MF	GO:0098748	endocytic adaptor activity	5/1290	11/17548	0.000676068	0.00474329	0.00379737	AP2B1/AP2A2/AP2A1/PICALM/HIP1	5
MF	GO:0016620	oxidoreductase activity, acting on the aldehyde or oxo group of donors, NAD or NADP as acceptor	9/1290	35/17548	0.000748653	0.00521086	0.00417169	GAPDH/DLD/OGDH/ALDH1B1/DLAT/PDHB/ALDH18A1/ALDH4A1/PDHA1	9
MF	GO:0042887	amide transmembrane transporter activity	10/1290	43/17548	0.000908293	0.00622322	0.00498216	TOMM40/TOMM70/TOMM22/TIMM17A/TOMM20/SLC25A32/TAPBP/SEC61B/TAP1/TOMM7	10
MF	GO:0060590	ATPase regulator activity	10/1290	43/17548	0.000908293	0.00622322	0.00498216	GRPEL1/PFN1/DNAJA2/ATP5IF1/TOR1AIP1/TOR1AIP2/ATP1B3/DNAJB1/ATP1B1/BAG2	10
MF	GO:0031489	myosin V binding	6/1290	17/17548	0.000952286	0.00647407	0.00518299	FUS/RAB10/RAB14/RAB6A/RAB8A/RAB11B	6
MF	GO:0016903	oxidoreductase activity, acting on the aldehyde or oxo group of donors	10/1290	45/17548	0.00132147	0.00891481	0.00713698	GAPDH/DLD/OGDH/ALDH1B1/DLAT/PDHB/ALDH18A1/ALDH4A1/PDHA1/MRPS36	10
MF	GO:0097718	disordered domain specific binding	8/1290	31/17548	0.00142871	0.00956471	0.00765728	CLTC/GAPDH/HSPA1A/HSP90AB1/EZR/HSP90AA1/AP2A2/FKBP8	8
MF	GO:0031072	heat shock protein binding	19/1290	122/17548	0.00144349	0.00959047	0.0076779	HSPA5/HYOU1/HSPA9/HSPA8/HSPA1A/HSPA1B/HSP90AB1/OGDH/RPS3/PTGES3/KPNB1/STIP1/DNAJA2/LMAN2/HSPA4/ST13/CSNK2A1/DNAJC8/DNAJB1	19

## Sheet: PDX.GO.All
ONTOLOGY	ID	Description	GeneRatio	BgRatio	pvalue	p.adjust	qvalue	geneID	Count
BP	GO:0006613	cotranslational protein targeting to membrane	78/1181	96/17653	9.20678e-75	4.61812e-71	3.84843e-71	RPL3/RPSA/RPL6/RPL4/RPL15/RPLP2/RPS3A/RPL7A/RPL12/RPL30/RPS7/RPL18/RPS2/RPL7/RPS4X/RPS3/UBA52/RPL14/RPL8/RPL19/RPL27/RPL28/RPS6/SEC63/RPS8/RPLP0/RPL21/RPL22/RPL18A/RPS10/RPL32/RPL10/RPL5/RPS26/SSR1/RPL9/RPS12/RPL11/RPS16/RPL13/RPS20/SEC61A1/RPL23/RPL31/RPS28/RPL26/RPS14/RPS19/RPL27A/RPS24/RPL34/RPL37A/SEC62/RPS18/RPL13A/RPS25/RPL29/RPL17/RPL35/RPL36A/SRP72/ARL6IP1/RPL10A/RPL23A/RPL35A/SRP14/RPS5/…	78
BP	GO:0045047	protein targeting to ER	78/1181	101/17653	1.57352e-71	3.9464e-68	3.28866e-68	HYOU1/RPL3/RPSA/RPL6/RPL4/RPL15/RPLP2/RPS3A/RPL7A/RPL12/RPL30/RPS7/RPL18/RPS2/RPL7/RPS4X/RPS3/UBA52/RPL14/RPL8/RPL19/RPL27/RPL28/RPS6/SEC63/RPS8/RPLP0/RPL21/RPL22/RPL18A/RPS10/RPL32/RPL10/RPL5/SPCS2/RPS26/RPL9/RPS12/RPL11/RPS16/RPL13/RPS20/SEC61A1/RPL23/RPL31/RPS28/RPL26/SPCS3/RPS14/RPS19/RPL27A/RPS24/RPL34/RPL37A/SEC62/RPS18/RPL13A/RPS25/RPL29/RPL17/RPL35/RPL36A/SRP72/RPL10A/RPL23A/RPL35A/SRP14/…	78
BP	GO:0072599	establishment of protein localization to endoplasmic reticulum	79/1181	105/17653	7.59516e-71	1.26991e-67	1.05826e-67	HYOU1/RPL3/RPSA/RPL6/RPL4/RAB10/RPL15/RPLP2/RPS3A/RPL7A/RPL12/RPL30/RPS7/RPL18/RPS2/RPL7/RPS4X/RPS3/UBA52/RPL14/RPL8/RPL19/RPL27/RPL28/RPS6/SEC63/RPS8/RPLP0/RPL21/RPL22/RPL18A/RPS10/RPL32/RPL10/RPL5/SPCS2/RPS26/RPL9/RPS12/RPL11/RPS16/RPL13/RPS20/SEC61A1/RPL23/RPL31/RPS28/RPL26/SPCS3/RPS14/RPS19/RPL27A/RPS24/RPL34/RPL37A/SEC62/RPS18/RPL13A/RPS25/RPL29/RPL17/RPL35/RPL36A/SRP72/RPL10A/RPL23A/RPL35A/…	79
BP	GO:0070972	protein localization to endoplasmic reticulum	87/1181	131/17653	2.87115e-70	3.60042e-67	3.00035e-67	HSPA5/PDIA3/VAPA/RTN4/HYOU1/DDRGK1/BCAP31/RPL3/RPSA/RPL6/RPL4/RAB10/RPL15/RPLP2/RPS3A/RPL7A/RPL12/RPL30/RPS7/RPL18/RPS2/RPL7/RPS4X/RPS3/UBA52/RPL14/RPL8/RPL19/RPL27/RPL28/RPS6/SEC63/RPS8/RPLP0/RPL21/RPL22/RPL18A/RPS10/RPL32/RPL10/RPL5/SPCS2/RPS26/RPL9/RPS12/RPL11/RPS16/RPL13/RPS20/SEC61A1/RPL23/RPL31/RPS28/RPL26/SPCS3/RPS14/RPS19/RPL27A/RPS24/RPL34/RPL37A/SEC62/RPS18/RPL13A/RPS25/RPL29/RPL17/RPL3…	87
BP	GO:0006614	SRP-dependent cotranslational protein targeting to membrane	73/1181	91/17653	3.21175e-69	3.22203e-66	2.68502e-66	RPL3/RPSA/RPL6/RPL4/RPL15/RPLP2/RPS3A/RPL7A/RPL12/RPL30/RPS7/RPL18/RPS2/RPL7/RPS4X/RPS3/UBA52/RPL14/RPL8/RPL19/RPL27/RPL28/RPS6/SEC63/RPS8/RPLP0/RPL21/RPL22/RPL18A/RPS10/RPL32/RPL10/RPL5/RPS26/RPL9/RPS12/RPL11/RPS16/RPL13/RPS20/SEC61A1/RPL23/RPL31/RPS28/RPL26/RPS14/RPS19/RPL27A/RPS24/RPL34/RPL37A/RPS18/RPL13A/RPS25/RPL29/RPL17/RPL35/RPL36A/SRP72/RPL10A/RPL23A/RPL35A/SRP14/RPS5/RPLP1/RPL38/RPS13/R…	73
BP	GO:0000184	nuclear-transcribed mRNA catabolic process, nonsense-mediated decay	70/1181	120/17653	6.30021e-51	5.26698e-48	4.38915e-48	PABPC1/RPL3/RPSA/RPL6/RPL4/RPL15/RPLP2/RPS3A/RPL7A/RPL12/RPL30/RPS7/RPL18/RPS2/RPL7/RPS4X/RPS3/UBA52/RPL14/RPL8/RPL19/RPL27/RPL28/RPS6/RPS8/RPLP0/RPL21/RPL22/RPL18A/RPS10/RPL32/RPL10/RPL5/RPS26/RPL9/RPS12/RPL11/RPS16/RPL13/RPS20/RPL23/RPL31/RPS28/RPL26/RPS14/RPS19/RPL27A/RPS24/RPL34/RPL37A/RPS18/RPL13A/RPS25/RPL29/RPL17/RPL35/RPL36A/RPL10A/RPL23A/RPL35A/RPS5/RPLP1/RPL38/RPS13/RPL39/RPL24/RPL36/RP…	70
BP	GO:0006605	protein targeting	127/1181	419/17653	2.34317e-50	1.67905e-47	1.39921e-47	HSPD1/HSPA8/UQCRC2/HYOU1/SLC25A6/NUCB1/PITRM1/TOMM70/TOMM40/GRPEL1/RPL3/ATP5IF1/RPSA/SCARB2/RPL6/RPL4/RPL15/RPLP2/TIMM50/RPS3A/RPL7A/RPL12/RAB7A/HSP90AA1/TIMM13/PEX14/RPL30/TOMM20/RPS7/RPL18/RAC2/RPS2/RPL7/AGK/RPS4X/RPS3/YWHAZ/UBA52/RPL14/RPL8/RPL19/RPL27/RPL28/TIMM44/TOMM22/RPS6/SEC63/RPS8/RPLP0/RPL21/RPL22/RPL18A/LAMP2/RPS10/RPL32/RPL10/RPL5/SPCS2/RPS26/SSR1/RPL9/RPS12/RPL11/CHCHD4/RPS16/RPL13/…	127
BP	GO:0090150	establishment of protein localization to membrane	105/1181	296/17653	6.26116e-49	3.68912e-46	3.07426e-46	KRT18/HYOU1/EGFR/RPL3/RPSA/RPL6/RPL4/ACSL3/RAB10/RPL15/RACK1/ATP1B1/RPLP2/RPS3A/RPL7A/RPL12/HSP90AA1/TIMM13/RPL30/VAMP3/RPS7/NSF/RPL18/RPS2/RPL7/AGK/RPS4X/RPS3/YWHAZ/UBA52/RPL14/RPL8/RPL19/RPL27/RPL28/TOMM22/RPS6/SEC63/RPS8/RAB11B/RPLP0/RPL21/RPL22/RPL18A/RPS10/RPL32/RPL10/RPL5/RPS26/SSR1/RPL9/RPS12/RPL11/SCRIB/RPS16/RPL13/RPS20/SEC61A1/RPL23/RPL31/RPS28/RPL26/RPS14/RPS19/YWHAB/RPL27A/RPS24/FIS1/…	105
BP	GO:0006612	protein targeting to membrane	83/1181	182/17653	6.61923e-49	3.68912e-46	3.07426e-46	HYOU1/RPL3/RPSA/RPL6/RPL4/RPL15/RPLP2/RPS3A/RPL7A/RPL12/RPL30/RPS7/RPL18/RPS2/RPL7/RPS4X/RPS3/UBA52/RPL14/RPL8/RPL19/RPL27/RPL28/RPS6/SEC63/RPS8/RPLP0/RPL21/RPL22/RPL18A/RPS10/RPL32/RPL10/RPL5/RPS26/SSR1/RPL9/RPS12/RPL11/RPS16/RPL13/RPS20/SEC61A1/RPL23/RPL31/RPS28/RPL26/RPS14/RPS19/RPL27A/RPS24/FIS1/RPL34/RPL37A/SEC62/SDCBP/RPS18/RPL13A/RPS25/RPL29/RPL17/RPL35/RPL36A/SRP72/ARL6IP1/RPL10A/RPL23A/R…	83
BP	GO:0045333	cellular respiration	78/1181	183/17653	2.50878e-43	1.25841e-40	1.04867e-40	ACO2/VCP/MDH2/SDHA/ETFA/GPD2/UQCRC2/UQCRC1/FH/OGDH/DLD/SLC25A13/TRAP1/DLST/CS/IDH3A/ETFB/DLAT/UQCRFS1/NNT/IDH3B/ME3/SLC25A12/PDHA1/COX6B1/COX2/CYCS/COX5A/CYC1/IDH2/NDUFS3/SUCLG1/SUCLG2/PDHB/SDHB/COX5B/COX4I1/NDUFA8/CISD1/COQ9/NDUFAF2/CAT/ETFDH/UQCRH/NDUFS1/PARK7/NDUFV2/NDUFV1/MYBBP1A/COX6A1/NDUFA10/NDUFS2/NDUFAB1/UQCRB/IDH3G/NDUFB11/COX7A2L/NDUFB10/COX20/SUCLA2/FASTKD5/COX6C/COX7B/COX1/PMPCB/NDUF…	78
BP	GO:0006413	translational initiation	80/1181	195/17653	6.56562e-43	2.99392e-40	2.49494e-40	NPM1/PABPC1/RPL3/RPSA/RPL6/RPL4/RPL15/RPLP2/RPS3A/RPL7A/KHDRBS1/RPL12/RPL30/RPS7/RPL18/RPS2/PPP1CA/RPL7/RPS4X/RPS3/UBA52/RPL14/RPL8/RPL19/RPL27/RPL28/RPS6/RPS8/DDX1/RPLP0/RPL21/RPL22/RPL18A/RPS10/RPL32/RPL10/RPL5/RPS26/RPL9/RPS12/RPL11/DDX3X/RPS16/RPL13/RPS20/RPL23/RPL31/RPS28/RPL26/RPS14/RPS19/DNAJC3/RPL27A/RPS24/RPL34/RPL37A/RPS18/EIF4B/RPL13A/RPS25/HSPB1/RPL29/RPL17/RPL35/RPL36A/RPL10A/RPL23A/…	80
BP	GO:0019080	viral gene expression	77/1181	190/17653	7.18034e-41	3.00138e-38	2.50115e-38	PTBP1/RPL3/DHX9/RPSA/RPL6/RPL4/RPL15/RPLP2/RPS3A/RPL7A/TARDBP/RPL12/RPL30/RPS7/RPL18/RPS2/RPL7/RPS4X/RPS3/UBA52/RPL14/RPL8/RPL19/RPL27/RPL28/PCBP2/RPS6/RPS8/RPLP0/RPL21/RPL22/RPL18A/SSB/RPS10/RPL32/RPL10/RPL5/RPS26/RPL9/RPS12/RPL11/RPS16/RPL13/RPS20/RPL23/RPL31/RPS28/RPL26/RPS14/RPS19/RPL27A/RPS24/RPL34/RPL37A/RPS18/RPL13A/RPS25/RPL29/RPL17/RPL35/RPL36A/NUP155/RPL10A/RPL23A/RPL35A/RPS5/RPLP1/RPL3…	77
BP	GO:0006401	RNA catabolic process	109/1181	384/17653	3.24714e-40	1.2529e-37	1.04408e-37	HSPA8/LRPPRC/NPM1/HNRNPU/VIM/PABPC1/YBX1/HSPA1A/HSPA1B/SYNCRIP/HNRNPC/SET/RPL3/DHX9/PABPC4/HNRNPD/RPSA/HNRNPR/KHSRP/RPL6/RPL4/IGF2BP3/DDX5/RPL15/RPLP2/HNRNPA0/RPS3A/RPL7A/ELAVL1/TARDBP/RPL12/SLIRP/RPL30/RPS7/SND1/RPL18/RPS2/RPL7/RPS4X/RPS3/YWHAZ/SERBP1/UBA52/RPL14/RPL8/RPL19/RPL27/RPL28/ANP32A/RPS6/RPS8/RPLP0/RPL21/RPL22/RPL18A/SSB/RPS10/RPL32/RPL10/RPL5/RPS26/IGF2BP2/RPL9/RPS12/RPL11/RPS16/RPL13…	109
BP	GO:0019083	viral transcription	73/1181	176/17653	1.27884e-39	4.58192e-37	3.81826e-37	RPL3/DHX9/RPSA/RPL6/RPL4/RPL15/RPLP2/RPS3A/RPL7A/TARDBP/RPL12/RPL30/RPS7/RPL18/RPS2/RPL7/RPS4X/RPS3/UBA52/RPL14/RPL8/RPL19/RPL27/RPL28/RPS6/RPS8/RPLP0/RPL21/RPL22/RPL18A/RPS10/RPL32/RPL10/RPL5/RPS26/RPL9/RPS12/RPL11/RPS16/RPL13/RPS20/RPL23/RPL31/RPS28/RPL26/RPS14/RPS19/RPL27A/RPS24/RPL34/RPL37A/RPS18/RPL13A/RPS25/RPL29/RPL17/RPL35/RPL36A/NUP155/RPL10A/RPL23A/RPL35A/RPS5/RPLP1/RPL38/RPS13/AAAS/RPL…	73
BP	GO:0006402	mRNA catabolic process	103/1181	351/17653	1.91338e-39	6.39835e-37	5.33196e-37	HSPA8/NPM1/HNRNPU/VIM/PABPC1/YBX1/HSPA1A/HSPA1B/SYNCRIP/HNRNPC/SET/RPL3/DHX9/PABPC4/HNRNPD/RPSA/HNRNPR/KHSRP/RPL6/RPL4/IGF2BP3/DDX5/RPL15/RPLP2/HNRNPA0/RPS3A/RPL7A/ELAVL1/TARDBP/RPL12/RPL30/RPS7/RPL18/RPS2/RPL7/RPS4X/RPS3/YWHAZ/SERBP1/UBA52/RPL14/RPL8/RPL19/RPL27/RPL28/ANP32A/RPS6/RPS8/RPLP0/RPL21/RPL22/RPL18A/SSB/RPS10/RPL32/RPL10/RPL5/RPS26/IGF2BP2/RPL9/RPS12/RPL11/RPS16/RPL13/RPS20/RPL23/RPL31…	103
BP	GO:0006119	oxidative phosphorylation	62/1181	132/17653	1.04657e-37	3.28099e-35	2.73416e-35	ATP5F1B/VCP/SDHA/ATP5F1A/UQCRC2/UQCRC1/DLD/RHOA/UQCRFS1/STOML2/ATP5PF/ATP5F1C/ATP5PO/COX6B1/COX2/CYCS/COX5A/CYC1/NDUFS3/PPIF/ATP5PD/COX5B/ATP5PB/COX4I1/NDUFA8/COQ9/ATP5F1D/UQCRH/NDUFS1/PARK7/NDUFV2/NDUFV1/ATP5MF/COX6A1/NDUFA10/NDUFS2/NDUFAB1/UQCRB/NDUFB11/COX7A2L/NIPSNAP2/NDUFB10/COX6C/COX7B/COX1/ATP8/ATP5ME/PMPCB/ATP6/NDUFS6/NDUFS8/COA6/ATP5F1E/UQCR10/ATP5MG/NDUFS5/UQCRQ/NDUFA4/BID/COX3/NDUFA7/C…	62
BP	GO:0000956	nuclear-transcribed mRNA catabolic process	76/1181	209/17653	1.88451e-36	5.56041e-34	4.63368e-34	PABPC1/RPL3/RPSA/RPL6/RPL4/DDX5/RPL15/RPLP2/RPS3A/RPL7A/RPL12/RPL30/RPS7/RPL18/RPS2/RPL7/RPS4X/RPS3/UBA52/RPL14/RPL8/RPL19/RPL27/RPL28/RPS6/RPS8/RPLP0/RPL21/RPL22/RPL18A/SSB/RPS10/RPL32/RPL10/RPL5/RPS26/RPL9/RPS12/RPL11/RPS16/RPL13/RPS20/RPL23/RPL31/RPS28/RPL26/RPS14/RPS19/RPL27A/RPS24/RPL34/THRAP3/RPL37A/RPS18/EIF4B/RPL13A/RPS25/MTPAP/RPL29/RPL17/RPL35/RPL36A/RPL10A/RPL23A/RPL35A/RPS5/RPLP1/RPL3…	76
BP	GO:0022900	electron transport chain	68/1181	180/17653	6.37167e-34	1.77557e-31	1.47964e-31	ALDH2/SDHA/ETFA/ASPH/GPD2/UQCRC2/POR/UQCRC1/DLD/SLC25A13/ME2/P4HA2/MAOB/ETFB/UQCRFS1/IDH3B/SLC25A12/COX6B1/COX2/CYCS/COX5A/CYC1/NDUFS3/SDHB/COX5B/ALDH4A1/COX4I1/CYB5A/NDUFA8/COQ9/NDUFAF2/ETFDH/UQCRH/NDUFS1/PARK7/NDUFV2/GLRX5/C15orf48/NDUFV1/COX7A2/MYBBP1A/TXNRD2/COX6A1/NDUFA10/NDUFS2/NDUFAB1/UQCRB/NDUFB11/COX7A2L/NDUFB10/PTGES2/COX6C/COX7B/COX1/CYBA/PMPCB/NDUFS6/NDUFS8/FDX1/COA6/UQCR10/NDUFS5/UQC…	68
BP	GO:0015980	energy derivation by oxidation of organic compounds	84/1181	277/17653	1.89452e-33	5.00154e-31	4.16795e-31	ACO2/VCP/MDH2/SDHA/ETFA/ACADVL/GPD2/UQCRC2/UQCRC1/FH/OGDH/DLD/SLC25A13/TRAP1/DLST/CS/IDH3A/ETFB/DLAT/UQCRFS1/NNT/IDH3B/ME3/SLC25A12/PDHA1/GNAS/COX6B1/COX2/CYCS/COX5A/CYC1/IDH2/NDUFS3/SUCLG1/SUCLG2/PDHB/SDHB/COX5B/PPP1CA/COX4I1/UBA52/NDUFA8/CISD1/COQ9/NDUFAF2/CAT/ETFDH/UQCRH/NDUFS1/PARK7/NDUFV2/NDUFV1/MYBBP1A/COX6A1/NDUFA10/NDUFS2/NDUFAB1/UQCRB/IDH3G/NDUFB11/STBD1/COX7A2L/CAVIN3/NDUFB10/COX20/SUCL…	84
BP	GO:0046034	ATP metabolic process	84/1181	279/17653	3.41574e-33	8.56667e-31	7.13889e-31	ATP5F1B/VCP/HSPA8/PKM/SDHA/ATP5F1A/UQCRC2/UQCRC1/ENO1/OGDH/DLD/SLC25A13/GAPDH/HSPA1A/HSPA1B/AK4/RHOA/PGK1/UQCRFS1/STOML2/HK1/ATP5IF1/ATP5PF/ATP5F1C/ATP5PO/ATP1B1/COX6B1/COX2/CYCS/COX5A/CYC1/NDUFS3/PPIF/ATP5PD/ALDOA/COX5B/ATP5PB/LDHA/COX4I1/NDUFA8/COQ9/ATP5F1D/UQCRH/NDUFS1/PARK7/NDUFV2/NDUFV1/ATP5MF/COX6A1/NDUFA10/NDUFS2/NDUFAB1/UQCRB/NDUFB11/COX7A2L/NIPSNAP2/NDUFB10/ADPGK/NUP155/COX6C/COX7B/COX1/…	84
BP	GO:0009205	purine ribonucleoside triphosphate metabolic process	87/1181	309/17653	6.38968e-32	1.52622e-29	1.27185e-29	ATP5F1B/VCP/HSPA8/PKM/SDHA/ATP5F1A/UQCRC2/UQCRC1/ENO1/OGDH/DLD/SLC25A13/GAPDH/HSPA1A/HSPA1B/AK4/RHOA/PGK1/UQCRFS1/STOML2/HK1/ATP5IF1/ATP5PF/OPA1/ATP5F1C/ATP5PO/ATP1B1/COX6B1/COX2/CYCS/GNAI3/COX5A/CYC1/NDUFS3/PPIF/ATP5PD/ALDOA/COX5B/ATP5PB/LDHA/COX4I1/NDUFA8/COQ9/ATP5F1D/UQCRH/AK3/NDUFS1/PARK7/NDUFV2/NDUFV1/ATP5MF/COX6A1/NDUFA10/NDUFS2/NDUFAB1/UQCRB/NDUFB11/COX7A2L/NIPSNAP2/NDUFB10/ADPGK/NUP155/CO…	87
BP	GO:0009167	purine ribonucleoside monophosphate metabolic process	89/1181	323/17653	7.46836e-32	1.70279e-29	1.41899e-29	ATP5F1B/VCP/HSPA8/PKM/SDHA/ATP5F1A/UQCRC2/UQCRC1/ENO1/OGDH/DLD/SLC25A13/GAPDH/HSPA1A/HSPA1B/AK4/RHOA/AK2/PGK1/UQCRFS1/STOML2/HK1/ATP5IF1/ATP5PF/ATP5F1C/ATP5PO/ATP1B1/COX6B1/COX2/CYCS/COX5A/CYC1/NDUFS3/PPIF/ATP5PD/ALDOA/COX5B/ATP5PB/LDHA/COX4I1/NDUFA8/COQ9/ATP5F1D/DLG1/UQCRH/CASK/AK3/NDUFS1/PARK7/NDUFV2/NDUFV1/SCRIB/ATP5MF/COX6A1/NDUFA10/NDUFS2/NDUFAB1/UQCRB/NDUFB11/COX7A2L/NIPSNAP2/NDUFB10/ADPGK/…	89
BP	GO:0006364	rRNA processing	80/1181	265/17653	9.59928e-32	2.01827e-29	1.68189e-29	RPL3/RPSA/RPL6/RPL4/RPL15/DDX17/RPLP2/RPS3A/RPL7A/RPL12/RPL30/RPS7/RPL18/RPS2/RPL7/RPS4X/RPS3/UBA52/RPL14/RPL8/RPL19/RPL27/RPL28/RPS6/RPS8/RPLP0/RPL21/RPL22/RPL18A/RPS10/RPL32/RPL10/RPL5/RPS26/RPL9/RPS12/RPL11/NOLC1/RPS16/RPL13/RPS20/RPL23/RPL31/RPS28/RPL26/RPS14/RPS19/RPL27A/RPS24/RPL34/RPL37A/RPS18/LYAR/RPL13A/RPS25/RPL29/RPL17/DDX21/RPL35/RPL36A/RPL10A/RPL23A/RPL35A/MTREX/RPS5/RPLP1/RPL38/RPS1…	80
BP	GO:0009126	purine nucleoside monophosphate metabolic process	89/1181	324/17653	9.65679e-32	2.01827e-29	1.68189e-29	ATP5F1B/VCP/HSPA8/PKM/SDHA/ATP5F1A/UQCRC2/UQCRC1/ENO1/OGDH/DLD/SLC25A13/GAPDH/HSPA1A/HSPA1B/AK4/RHOA/AK2/PGK1/UQCRFS1/STOML2/HK1/ATP5IF1/ATP5PF/ATP5F1C/ATP5PO/ATP1B1/COX6B1/COX2/CYCS/COX5A/CYC1/NDUFS3/PPIF/ATP5PD/ALDOA/COX5B/ATP5PB/LDHA/COX4I1/NDUFA8/COQ9/ATP5F1D/DLG1/UQCRH/CASK/AK3/NDUFS1/PARK7/NDUFV2/NDUFV1/SCRIB/ATP5MF/COX6A1/NDUFA10/NDUFS2/NDUFAB1/UQCRB/NDUFB11/COX7A2L/NIPSNAP2/NDUFB10/ADPGK/…	89
BP	GO:0043312	neutrophil degranulation	111/1181	485/17653	1.45004e-31	2.90936e-29	2.42447e-29	KRT1/ANXA2/VCP/HSPA8/PKM/JUP/CYB5R3/VAPA/CKAP4/DDOST/EEF1A1/EEF2/ERP44/HSPA1A/HSPA1B/ILF2/RHOA/XRCC5/CTSD/PGRMC1/CEACAM6/HRNR/XRCC6/CD44/HMOX2/FAF2/VAT1/SNAP23/RAB10/PRDX4/RAP1B/TXNDC5/RAB5C/PSAP/RAB14/RAB7A/LCN2/HSP90AA1/TICAM2/CD55/DNAJC5/RAC1/HSP90AB1/S100A11/ALDOA/LPCAT1/HMGB1/PPIA/CD59/ADGRE5/B2M/TUBB4B/LAMP1/CAT/IQGAP1/ARL8A/LAMP2/RAB18/LGALS3/TMEM173/CEACAM1/DDX3X/MVP/RHOG/ITGAV/AP2A2/MLEC…	111
BP	GO:0002283	neutrophil activation involved in immune response	111/1181	488/17653	2.60355e-31	5.02285e-29	4.18571e-29	KRT1/ANXA2/VCP/HSPA8/PKM/JUP/CYB5R3/VAPA/CKAP4/DDOST/EEF1A1/EEF2/ERP44/HSPA1A/HSPA1B/ILF2/RHOA/XRCC5/CTSD/PGRMC1/CEACAM6/HRNR/XRCC6/CD44/HMOX2/FAF2/VAT1/SNAP23/RAB10/PRDX4/RAP1B/TXNDC5/RAB5C/PSAP/RAB14/RAB7A/LCN2/HSP90AA1/TICAM2/CD55/DNAJC5/RAC1/HSP90AB1/S100A11/ALDOA/LPCAT1/HMGB1/PPIA/CD59/ADGRE5/B2M/TUBB4B/LAMP1/CAT/IQGAP1/ARL8A/LAMP2/RAB18/LGALS3/TMEM173/CEACAM1/DDX3X/MVP/RHOG/ITGAV/AP2A2/MLEC…	111
BP	GO:0022904	respiratory electron transport chain	52/1181	113/17653	2.97141e-31	5.51517e-29	4.59597e-29	SDHA/ETFA/GPD2/UQCRC2/UQCRC1/DLD/SLC25A13/ETFB/UQCRFS1/SLC25A12/COX6B1/COX2/CYCS/COX5A/CYC1/NDUFS3/SDHB/COX5B/COX4I1/NDUFA8/COQ9/NDUFAF2/ETFDH/UQCRH/NDUFS1/PARK7/NDUFV2/NDUFV1/MYBBP1A/COX6A1/NDUFA10/NDUFS2/NDUFAB1/UQCRB/NDUFB11/COX7A2L/NDUFB10/COX6C/COX7B/COX1/PMPCB/NDUFS6/NDUFS8/COA6/UQCR10/NDUFS5/UQCRQ/NDUFA4/BID/COX3/NDUFA7/COX7C	52
BP	GO:0009199	ribonucleoside triphosphate metabolic process	87/1181	315/17653	3.07864e-31	5.51517e-29	4.59597e-29	ATP5F1B/VCP/HSPA8/PKM/SDHA/ATP5F1A/UQCRC2/UQCRC1/ENO1/OGDH/DLD/SLC25A13/GAPDH/HSPA1A/HSPA1B/AK4/RHOA/PGK1/UQCRFS1/STOML2/HK1/ATP5IF1/ATP5PF/OPA1/ATP5F1C/ATP5PO/ATP1B1/COX6B1/COX2/CYCS/GNAI3/COX5A/CYC1/NDUFS3/PPIF/ATP5PD/ALDOA/COX5B/ATP5PB/LDHA/COX4I1/NDUFA8/COQ9/ATP5F1D/UQCRH/AK3/NDUFS1/PARK7/NDUFV2/NDUFV1/ATP5MF/COX6A1/NDUFA10/NDUFS2/NDUFAB1/UQCRB/NDUFB11/COX7A2L/NIPSNAP2/NDUFB10/ADPGK/NUP155/CO…	87
BP	GO:0009144	purine nucleoside triphosphate metabolic process	87/1181	316/17653	3.98391e-31	6.8908e-29	5.74233e-29	ATP5F1B/VCP/HSPA8/PKM/SDHA/ATP5F1A/UQCRC2/UQCRC1/ENO1/OGDH/DLD/SLC25A13/GAPDH/HSPA1A/HSPA1B/AK4/RHOA/PGK1/UQCRFS1/STOML2/HK1/ATP5IF1/ATP5PF/OPA1/ATP5F1C/ATP5PO/ATP1B1/COX6B1/COX2/CYCS/GNAI3/COX5A/CYC1/NDUFS3/PPIF/ATP5PD/ALDOA/COX5B/ATP5PB/LDHA/COX4I1/NDUFA8/COQ9/ATP5F1D/UQCRH/AK3/NDUFS1/PARK7/NDUFV2/NDUFV1/ATP5MF/COX6A1/NDUFA10/NDUFS2/NDUFAB1/UQCRB/NDUFB11/COX7A2L/NIPSNAP2/NDUFB10/ADPGK/NUP155/CO…	87
BP	GO:0042119	neutrophil activation	111/1181	498/17653	1.76179e-30	2.94571e-28	2.45476e-28	KRT1/ANXA2/VCP/HSPA8/PKM/JUP/CYB5R3/VAPA/CKAP4/DDOST/EEF1A1/EEF2/ERP44/HSPA1A/HSPA1B/ILF2/RHOA/XRCC5/CTSD/PGRMC1/CEACAM6/HRNR/XRCC6/CD44/HMOX2/FAF2/VAT1/SNAP23/RAB10/PRDX4/RAP1B/TXNDC5/RAB5C/PSAP/RAB14/RAB7A/LCN2/HSP90AA1/TICAM2/CD55/DNAJC5/RAC1/HSP90AB1/S100A11/ALDOA/LPCAT1/HMGB1/PPIA/CD59/ADGRE5/B2M/TUBB4B/LAMP1/CAT/IQGAP1/ARL8A/LAMP2/RAB18/LGALS3/TMEM173/CEACAM1/DDX3X/MVP/RHOG/ITGAV/AP2A2/MLEC…	111
BP	GO:0009161	ribonucleoside monophosphate metabolic process	89/1181	336/17653	1.93017e-30	3.12313e-28	2.60261e-28	ATP5F1B/VCP/HSPA8/PKM/SDHA/ATP5F1A/UQCRC2/UQCRC1/ENO1/OGDH/DLD/SLC25A13/GAPDH/HSPA1A/HSPA1B/AK4/RHOA/AK2/PGK1/UQCRFS1/STOML2/HK1/ATP5IF1/ATP5PF/ATP5F1C/ATP5PO/ATP1B1/COX6B1/COX2/CYCS/COX5A/CYC1/NDUFS3/PPIF/ATP5PD/ALDOA/COX5B/ATP5PB/LDHA/COX4I1/NDUFA8/COQ9/ATP5F1D/DLG1/UQCRH/CASK/AK3/NDUFS1/PARK7/NDUFV2/NDUFV1/SCRIB/ATP5MF/COX6A1/NDUFA10/NDUFS2/NDUFAB1/UQCRB/NDUFB11/COX7A2L/NIPSNAP2/NDUFB10/ADPGK/…	89
BP	GO:0009141	nucleoside triphosphate metabolic process	89/1181	337/17653	2.45973e-30	3.85562e-28	3.21302e-28	ATP5F1B/VCP/HSPA8/PKM/SDHA/ATP5F1A/UQCRC2/UQCRC1/ENO1/OGDH/DLD/SLC25A13/GAPDH/HSPA1A/HSPA1B/AK4/RHOA/PGK1/UQCRFS1/STOML2/HK1/ATP5IF1/ATP5PF/OPA1/ATP5F1C/ATP5PO/ATP1B1/COX6B1/COX2/CYCS/GNAI3/COX5A/CYC1/NDUFS3/SUCLG1/PPIF/ATP5PD/ALDOA/COX5B/ATP5PB/LDHA/COX4I1/NDUFA8/COQ9/ATP5F1D/DUT/UQCRH/AK3/NDUFS1/PARK7/NDUFV2/NDUFV1/ATP5MF/COX6A1/NDUFA10/NDUFS2/NDUFAB1/UQCRB/NDUFB11/COX7A2L/NIPSNAP2/NDUFB10/ADPG…	89
BP	GO:0002446	neutrophil mediated immunity	111/1181	500/17653	2.56438e-30	3.89786e-28	3.24821e-28	KRT1/ANXA2/VCP/HSPA8/PKM/JUP/CYB5R3/VAPA/CKAP4/DDOST/EEF1A1/EEF2/ERP44/HSPA1A/HSPA1B/ILF2/RHOA/XRCC5/CTSD/PGRMC1/CEACAM6/HRNR/XRCC6/CD44/HMOX2/FAF2/VAT1/SNAP23/RAB10/PRDX4/RAP1B/TXNDC5/RAB5C/PSAP/RAB14/RAB7A/LCN2/HSP90AA1/TICAM2/CD55/DNAJC5/RAC1/HSP90AB1/S100A11/ALDOA/LPCAT1/HMGB1/PPIA/CD59/ADGRE5/B2M/TUBB4B/LAMP1/CAT/IQGAP1/ARL8A/LAMP2/RAB18/LGALS3/TMEM173/CEACAM1/DDX3X/MVP/RHOG/ITGAV/AP2A2/MLEC…	111
BP	GO:0009123	nucleoside monophosphate metabolic process	91/1181	352/17653	3.12397e-30	4.60877e-28	3.84064e-28	ATP5F1B/VCP/HSPA8/PKM/SDHA/ATP5F1A/UQCRC2/UQCRC1/ENO1/OGDH/DLD/SLC25A13/GAPDH/HSPA1A/HSPA1B/AK4/RHOA/AK2/PGK1/UQCRFS1/STOML2/HK1/ATP5IF1/ATP5PF/ATP5F1C/ATP5PO/ATP1B1/COX6B1/COX2/CYCS/COX5A/CYC1/NDUFS3/PPIF/ATP5PD/ALDOA/COX5B/ATP5PB/LDHA/COX4I1/NDUFA8/COQ9/ATP5F1D/DLG1/DUT/UQCRH/CASK/AK3/NDUFS1/PARK7/NDUFV2/NDUFV1/SCRIB/ATP5MF/COX6A1/NDUFA10/NDUFS2/NDUFAB1/UQCRB/NDUFB11/COX7A2L/NIPSNAP2/NDUFB10/AD…	91
BP	GO:0009060	aerobic respiration	44/1181	84/17653	1.0985e-29	1.57431e-27	1.31192e-27	ACO2/VCP/MDH2/SDHA/UQCRC2/UQCRC1/FH/OGDH/DLD/DLST/CS/IDH3A/DLAT/NNT/IDH3B/ME3/PDHA1/COX6B1/COX2/CYCS/COX5A/IDH2/SUCLG1/SUCLG2/PDHB/SDHB/COX5B/COX4I1/CAT/UQCRH/COX6A1/UQCRB/IDH3G/COX7A2L/COX20/SUCLA2/COX6C/COX7B/COX1/PMPCB/UQCR10/NDUFA4/COX3/COX7C	44
BP	GO:0016072	rRNA metabolic process	82/1181	299/17653	2.94731e-29	4.10658e-27	3.42215e-27	NCL/CAVIN1/RPL3/RPSA/RPL6/RPL4/RPL15/DDX17/RPLP2/RPS3A/RPL7A/RPL12/RPL30/RPS7/RPL18/RPS2/RPL7/RPS4X/RPS3/UBA52/RPL14/RPL8/RPL19/RPL27/RPL28/RPS6/RPS8/RPLP0/RPL21/RPL22/RPL18A/RPS10/RPL32/RPL10/RPL5/RPS26/RPL9/RPS12/RPL11/NOLC1/RPS16/RPL13/RPS20/RPL23/RPL31/RPS28/RPL26/RPS14/RPS19/RPL27A/RPS24/RPL34/RPL37A/RPS18/LYAR/RPL13A/RPS25/RPL29/RPL17/DDX21/RPL35/RPL36A/RPL10A/RPL23A/RPL35A/MTREX/RPS5/RPLP1…	82
BP	GO:0022613	ribonucleoprotein complex biogenesis	106/1181	475/17653	3.54877e-29	4.81099e-27	4.00916e-27	NPM1/C1QBP/RPL3/DHX9/DDX39B/RPSA/RPL6/RPL4/RPL15/SRSF1/DDX17/RPLP2/RPS3A/RPL7A/RPL12/HSP90AA1/RPL30/RPS7/HSP90AB1/RPL18/RPS2/RPL7/RPS4X/RPS3/UBA52/RPL14/RPL8/RPL19/RPL27/SNRPD3/RPL28/SF1/RPS6/RPS8/DDX1/RPLP0/RPL21/SRSF6/RPL22/SNRPD1/RPL18A/SNRPD2/RPS10/RPL32/RPL10/RPL5/RPS26/SF3B1/RPL9/RPS12/RPL11/DDX3X/NOLC1/RPS16/RPL13/RPS20/RPL23/RPL31/RPS28/RPL26/RPS14/RPS19/RBMX/RPL27A/RPS24/RPL34/RPL37A/RPS…	106
BP	GO:0042254	ribosome biogenesis	84/1181	335/17653	5.73163e-27	7.56575e-25	6.30479e-25	NPM1/C1QBP/RPL3/RPSA/RPL6/RPL4/RPL15/DDX17/RPLP2/RPS3A/RPL7A/RPL12/RPL30/RPS7/RPL18/RPS2/RPL7/RPS4X/RPS3/UBA52/RPL14/RPL8/RPL19/RPL27/RPL28/RPS6/RPS8/RPLP0/RPL21/RPL22/RPL18A/RPS10/RPL32/RPL10/RPL5/RPS26/RPL9/RPS12/RPL11/DDX3X/NOLC1/RPS16/RPL13/RPS20/RPL23/RPL31/RPS28/RPL26/RPS14/RPS19/RPL27A/RPS24/RPL34/RPL37A/RPS18/LYAR/RPL13A/RPS25/RPL29/RPL17/DDX21/RPL35/RPL36A/RPL10A/RPL23A/RPL35A/MTREX/RPS5…	84
BP	GO:0000183	chromatin silencing at rDNA	29/1181	39/17653	2.0741e-26	2.66761e-24	2.22301e-24	HIST1H3A/HIST1H3D/HIST1H3C/HIST1H3E/HIST1H3I/HIST1H3G/HIST1H3J/HIST1H3H/HIST1H3B/HIST1H3F/H3F3A/H3F3B/HIST1H4I/HIST1H4A/HIST1H4D/HIST1H4F/HIST1H4K/HIST1H4J/HIST1H4C/HIST1H4H/HIST1H4B/HIST1H4E/HIST1H4L/HIST2H4A/HIST4H4/HIST2H4B/HIST2H3C/HIST2H3A/HIST2H3D	29
BP	GO:0042773	ATP synthesis coupled electron transport	43/1181	96/17653	1.82654e-25	2.29048e-23	1.90874e-23	SDHA/UQCRC2/UQCRC1/DLD/UQCRFS1/COX6B1/COX2/CYCS/COX5A/CYC1/NDUFS3/COX5B/COX4I1/NDUFA8/COQ9/UQCRH/NDUFS1/PARK7/NDUFV2/NDUFV1/COX6A1/NDUFA10/NDUFS2/NDUFAB1/UQCRB/NDUFB11/COX7A2L/NDUFB10/COX6C/COX7B/COX1/PMPCB/NDUFS6/NDUFS8/COA6/UQCR10/NDUFS5/UQCRQ/NDUFA4/BID/COX3/NDUFA7/COX7C	43
BP	GO:0042775	mitochondrial ATP synthesis coupled electron transport	42/1181	95/17653	1.26394e-24	1.54632e-22	1.2886e-22	SDHA/UQCRC2/UQCRC1/DLD/UQCRFS1/COX6B1/COX2/CYCS/COX5A/CYC1/NDUFS3/COX5B/COX4I1/NDUFA8/COQ9/UQCRH/NDUFS1/PARK7/NDUFV2/NDUFV1/COX6A1/NDUFA10/NDUFS2/NDUFAB1/UQCRB/NDUFB11/COX7A2L/NDUFB10/COX6C/COX7B/COX1/PMPCB/NDUFS6/NDUFS8/UQCR10/NDUFS5/UQCRQ/NDUFA4/BID/COX3/NDUFA7/COX7C	42
BP	GO:0002181	cytoplasmic translation	40/1181	88/17653	4.44329e-24	5.30656e-22	4.42213e-22	EEF2/DHX9/RPL6/RPL4/RPL15/RPLP2/RPS3A/RPL30/RPS7/RPL18/RPL7/RPS3/RPL8/RPL19/RPLP0/RPL22/RPL18A/RPL32/RPS26/RPL9/RPL11/RPS20/RPL31/RPS28/RPL26/RPL27A/MRPL2/EIF4B/RPL13A/RPL29/RPL17/RPL36A/RPL10A/RPL35A/RPLP1/RPL38/RPL39/RPL24/RBM4/RPL36	40
BP	GO:1990542	mitochondrial transmembrane transport	41/1181	93/17653	5.19225e-24	6.05682e-22	5.04735e-22	HSPD1/ATP5F1B/ATP5F1A/SLC25A13/TST/TOMM40/LETM1/CPT2/STOML2/GRPEL1/ATP5PF/OPA1/ATP5F1C/SLC25A12/ATP5PO/TIMM50/TIMM13/CYC1/ATP5PD/TOMM20/COX5B/AGK/ATP5PB/TIMM44/TOMM22/SLC25A1/ATP5F1D/CPT1A/CHCHD4/ATP5MF/AFG3L2/MPC1/ATP8/ATP5ME/SLC25A32/ATP6/TIMM23/ATP5F1E/TOMM7/ATP5MG/MCU	41
BP	GO:0034470	ncRNA processing	90/1181	425/17653	3.50561e-23	3.99639e-21	3.33033e-21	HNRNPA2B1/HSD17B10/RPL3/RPSA/RPL6/RPL4/RPL15/DDX17/RPLP2/RPS3A/RPL7A/RPL12/RPL30/RPS7/RPL18/RPS2/RPL7/RPS4X/RPS3/UBA52/RPL14/RPL8/RPL19/RPL27/RPL28/RPS6/RPS8/DDX1/RPLP0/RPL21/RPL22/RPL18A/SSB/RPS10/RPL32/RPL10/RPL5/RPS26/RPL9/RPS12/RPL11/NOLC1/RPS16/RPL13/RPS20/RPL23/RPL31/RPS28/RPL26/RPS14/RPS19/GRSF1/RPL27A/RPS24/RPL34/RPL37A/RPS18/TRMT1L/LYAR/ELAC2/RPL13A/RPS25/RPL29/RTCB/RPL17/DDX21/RPL35/RPL…	90
BP	GO:0051290	protein heterotetramerization	29/1181	48/17653	2.09307e-22	2.33307e-20	1.94423e-20	ANXA2/XRCC6/HIST1H3A/HIST1H3D/HIST1H3C/HIST1H3E/HIST1H3I/HIST1H3G/HIST1H3J/HIST1H3H/HIST1H3B/HIST1H3F/HIST1H4I/HIST1H4A/HIST1H4D/HIST1H4F/HIST1H4K/HIST1H4J/HIST1H4C/HIST1H4H/HIST1H4B/HIST1H4E/HIST1H4L/HIST2H4A/HIST4H4/HIST2H4B/HSD17B8/NUDT21/S100A10	29
BP	GO:0006335	DNA replication-dependent nucleosome assembly	24/1181	32/17653	3.24234e-22	3.46034e-20	2.88361e-20	HIST1H3A/HIST1H3D/HIST1H3C/HIST1H3E/HIST1H3I/HIST1H3G/HIST1H3J/HIST1H3H/HIST1H3B/HIST1H3F/HIST1H4I/HIST1H4A/HIST1H4D/HIST1H4F/HIST1H4K/HIST1H4J/HIST1H4C/HIST1H4H/HIST1H4B/HIST1H4E/HIST1H4L/HIST2H4A/HIST4H4/HIST2H4B	24
BP	GO:0034723	DNA replication-dependent nucleosome organization	24/1181	32/17653	3.24234e-22	3.46034e-20	2.88361e-20	HIST1H3A/HIST1H3D/HIST1H3C/HIST1H3E/HIST1H3I/HIST1H3G/HIST1H3J/HIST1H3H/HIST1H3B/HIST1H3F/HIST1H4I/HIST1H4A/HIST1H4D/HIST1H4F/HIST1H4K/HIST1H4J/HIST1H4C/HIST1H4H/HIST1H4B/HIST1H4E/HIST1H4L/HIST2H4A/HIST4H4/HIST2H4B	24
BP	GO:0045815	positive regulation of gene expression, epigenetic	36/1181	79/17653	7.53265e-22	7.87162e-20	6.55969e-20	ACTB/HIST1H3A/HIST1H3D/HIST1H3C/HIST1H3E/HIST1H3I/HIST1H3G/HIST1H3J/HIST1H3H/HIST1H3B/HIST1H3F/CTNNB1/H3F3A/H3F3B/HIST1H4I/HIST1H4A/HIST1H4D/HIST1H4F/HIST1H4K/HIST1H4J/HIST1H4C/HIST1H4H/HIST1H4B/HIST1H4E/HIST1H4L/HIST2H4A/HIST4H4/HIST2H4B/HIST2H3C/HIST2H3A/HIST2H3D/SF3B1/MYBBP1A/DDX21/MYO1C/HMGA1	36
BP	GO:0034976	response to endoplasmic reticulum stress	66/1181	274/17653	2.11276e-20	2.16277e-18	1.80231e-18	HSPA5/PDIA3/HSP90B1/P4HB/CALR/ATP2A2/VCP/AIFM1/PDIA4/ACADVL/UGGT1/PDIA6/AGR2/HYOU1/ERO1A/EEF2/PTPN1/ERP44/HSPA1A/DDRGK1/BCAP31/UFL1/FAF2/TPP1/OPA1/VAPB/RACK1/TXNDC5/TMX3/HM13/SEL1L/LMNA/ERP29/DNAJB11/TMX1/SEC63/MYDGF/PARK7/SSR1/TMCO1/SEC61A1/ERLIN2/HDGF/DNAJC3/CAV1/ERLIN1/SRPRB/ERLEC1/ATP6V0D1/SEC62/WFS1/UBE4A/TMEM33/GOSR2/UBXN4/TOR1A/TBL2/DERL2/ARFGAP1/TXNDC12/YIF1A/PML/TMUB1/DERL1/SDF2L1/SYVN1	66
BP	GO:0006839	mitochondrial transport	73/1181	328/17653	2.66753e-20	2.67606e-18	2.23005e-18	HSPD1/ATP5F1B/ATP5F1A/ACAA2/UQCRC2/SLC25A24/SLC25A5/SLC25A6/PITRM1/SLC25A13/HSPA1A/TOMM70/TST/TOMM40/LETM1/CPT2/STOML2/GRPEL1/SLC25A3/ATP5IF1/ATP5PF/OPA1/ATP5F1C/SLC25A12/ATP5PO/TIMM50/HSP90AA1/TIMM13/CYC1/PPIF/ATP5PD/TOMM20/COX5B/RAC2/AGK/ATP5PB/YWHAZ/SLC25A11/CNP/TIMM44/TOMM22/SLC25A1/ATP5F1D/SLC25A22/CPT1A/CHCHD4/PMPCA/ATP5MF/YWHAB/FIS1/AFG3L2/MTX1/HAX1/MPC1/HTRA2/ATP8/ATP5ME/MFF/SLC25A32/PMPC…	73
BP	GO:0000375	RNA splicing, via transesterification reactions	72/1181	329/17653	1.34202e-19	1.31992e-17	1.09993e-17	HSPA8/HNRNPA2B1/HNRNPA1/HNRNPK/HNRNPL/HNRNPU/PTBP1/HNRNPH2/PABPC1/YBX1/HNRNPA3/SYNCRIP/HNRNPC/HNRNPM/HNRNPF/C1QBP/DHX9/DDX39B/NONO/DDX39A/HNRNPD/HNRNPH1/HNRNPR/KHSRP/SFPQ/DDX5/SRSF1/FUS/DDX17/HNRNPA0/KHDRBS1/ELAVL1/PCBP1/SRSF7/U2AF2/HNRNPH3/SRSF3/SNRPD3/SF1/PCBP2/DDX1/SRSF6/SNRPD1/SNRPD2/DAZAP1/SF3B1/SRSF4/RBMX/THRAP3/SRSF2/U2AF1/U2AF1L5/RBM25/SRRM1/RALY/HNRNPUL1/SF3B4/PUF60/MTREX/SNRPB/SCAF11/DH…	72
BP	GO:0006457	protein folding	62/1181	257/17653	2.83466e-19	2.73435e-17	2.27863e-17	HSPD1/HSPA5/PDIA3/HSP90B1/HSPA9/CANX/GANAB/P4HB/CALR/VCP/HSPA8/PDIA4/LMAN1/UGGT1/PDIA6/HYOU1/ERO1A/GNB1/PRKCSH/ERP44/TRAP1/HSPA1A/HSPA1B/GNB2/TOMM70/GRPEL1/PPIB/PRDX4/TXNDC5/HSPE1/CSNK2A1/HSP90AA1/GNAI3/TMX3/ERP29/PPIF/HSP90AB1/DNAJB11/TMX1/PPIA/GNAI2/B2M/UBA52/MESD/FKBP2/EMC1/CHCHD4/MLEC/MOGS/WFS1/FKBP8/HSPB1/TOR1A/TCP1/TTC1/CCT3/SELENOF/DERL1/DNAJA2/TOMM34/SNRNP70/DNAJA3	62
BP	GO:0000377	RNA splicing, via transesterification reactions with bulged adenosine as nucleophile	71/1181	326/17653	3.21675e-19	2.98801e-17	2.49e-17	HSPA8/HNRNPA2B1/HNRNPA1/HNRNPK/HNRNPL/HNRNPU/PTBP1/HNRNPH2/PABPC1/YBX1/HNRNPA3/SYNCRIP/HNRNPC/HNRNPM/HNRNPF/C1QBP/DHX9/DDX39B/NONO/DDX39A/HNRNPD/HNRNPH1/HNRNPR/SFPQ/DDX5/SRSF1/FUS/DDX17/HNRNPA0/KHDRBS1/ELAVL1/PCBP1/SRSF7/U2AF2/HNRNPH3/SRSF3/SNRPD3/SF1/PCBP2/DDX1/SRSF6/SNRPD1/SNRPD2/DAZAP1/SF3B1/SRSF4/RBMX/THRAP3/SRSF2/U2AF1/U2AF1L5/RBM25/SRRM1/RALY/HNRNPUL1/SF3B4/PUF60/MTREX/SNRPB/SCAF11/DHX15/SN…	71
BP	GO:0000398	mRNA splicing, via spliceosome	71/1181	326/17653	3.21675e-19	2.98801e-17	2.49e-17	HSPA8/HNRNPA2B1/HNRNPA1/HNRNPK/HNRNPL/HNRNPU/PTBP1/HNRNPH2/PABPC1/YBX1/HNRNPA3/SYNCRIP/HNRNPC/HNRNPM/HNRNPF/C1QBP/DHX9/DDX39B/NONO/DDX39A/HNRNPD/HNRNPH1/HNRNPR/SFPQ/DDX5/SRSF1/FUS/DDX17/HNRNPA0/KHDRBS1/ELAVL1/PCBP1/SRSF7/U2AF2/HNRNPH3/SRSF3/SNRPD3/SF1/PCBP2/DDX1/SRSF6/SNRPD1/SNRPD2/DAZAP1/SF3B1/SRSF4/RBMX/THRAP3/SRSF2/U2AF1/U2AF1L5/RBM25/SRRM1/RALY/HNRNPUL1/SF3B4/PUF60/MTREX/SNRPB/SCAF11/DHX15/SN…	71
BP	GO:0008380	RNA splicing	83/1181	432/17653	1.15031e-18	1.04908e-16	8.74233e-17	AHNAK/HSPA8/HNRNPA2B1/HNRNPA1/HNRNPK/HNRNPL/HNRNPU/PTBP1/HNRNPH2/PABPC1/YBX1/HSPA1A/HNRNPA3/SYNCRIP/HNRNPC/HNRNPM/HNRNPF/C1QBP/DHX9/DDX39B/NONO/DDX39A/HNRNPD/HNRNPH1/HNRNPR/KHSRP/SFPQ/DDX5/SRSF1/FUS/DDX17/HNRNPA0/KHDRBS1/ELAVL1/TARDBP/PCBP1/SRSF7/U2AF2/HNRNPH3/SRSF3/SNRPD3/SF1/PCBP2/DDX1/SRSF6/SNRPD1/SNRPD2/DAZAP1/LGALS3/RPS26/SF3B1/SRSF4/RBMX/PTBP3/THRAP3/SRSF2/U2AF1/U2AF1L5/RBM25/RBM39/SRRM1/RT…	83
BP	GO:0051262	protein tetramerization	45/1181	151/17653	3.92995e-18	3.52011e-16	2.93342e-16	ANXA2/PKM/SHMT2/HSD17B10/SOD2/GLS/XRCC6/HIST1H3A/HIST1H3D/HIST1H3C/HIST1H3E/HIST1H3I/HIST1H3G/HIST1H3J/HIST1H3H/HIST1H3B/HIST1H3F/ATP5IF1/CRYZ/HM13/PEX14/HMGCL/ALDOA/HIST1H4I/HIST1H4A/HIST1H4D/HIST1H4F/HIST1H4K/HIST1H4J/HIST1H4C/HIST1H4H/HIST1H4B/HIST1H4E/HIST1H4L/HIST2H4A/HIST4H4/HIST2H4B/CAT/DECR1/RPS19/HSD17B8/GOLGA2/NUDT21/DCXR/S100A10	45
BP	GO:0016054	organic acid catabolic process	61/1181	269/17653	1.41469e-17	1.22346e-15	1.01955e-15	HADHA/ETFA/GOT2/GLUD1/ACADVL/ACAA2/HSD17B10/PCK2/HADHB/OGDH/DLD/DLST/MCCC2/OAT/ETFB/ALDH7A1/GLS/ECHS1/HIBADH/CPT2/PCYOX1/CD44/ECI1/SCP2/ALDH3A2/HADH/BCAT2/ECH1/ACAT1/HMGCL/ACAD9/ATP2B4/ALDH4A1/CYP4F3/HSD17B4/MCCC1/HPDL/IVD/BCKDHA/ETFDH/CPT1A/ABHD10/DECR1/GCDH/ACAA1/NDUFAB1/ACADM/BCKDHB/ACOX1/ACADSB/MECR/ACADS/ACOT8/DBT/ACAD8/GCSH/DCXR/NUDT19/ALDH6A1/KYNU/PRODH2	61
BP	GO:0046395	carboxylic acid catabolic process	61/1181	269/17653	1.41469e-17	1.22346e-15	1.01955e-15	HADHA/ETFA/GOT2/GLUD1/ACADVL/ACAA2/HSD17B10/PCK2/HADHB/OGDH/DLD/DLST/MCCC2/OAT/ETFB/ALDH7A1/GLS/ECHS1/HIBADH/CPT2/PCYOX1/CD44/ECI1/SCP2/ALDH3A2/HADH/BCAT2/ECH1/ACAT1/HMGCL/ACAD9/ATP2B4/ALDH4A1/CYP4F3/HSD17B4/MCCC1/HPDL/IVD/BCKDHA/ETFDH/CPT1A/ABHD10/DECR1/GCDH/ACAA1/NDUFAB1/ACADM/BCKDHB/ACOX1/ACADSB/MECR/ACADS/ACOT8/DBT/ACAD8/GCSH/DCXR/NUDT19/ALDH6A1/KYNU/PRODH2	61
BP	GO:0006099	tricarboxylic acid cycle	20/1181	30/17653	4.36218e-17	3.70859e-15	3.09049e-15	ACO2/MDH2/SDHA/FH/OGDH/DLD/DLST/CS/IDH3A/DLAT/NNT/IDH3B/PDHA1/IDH2/SUCLG1/SUCLG2/PDHB/SDHB/IDH3G/SUCLA2	20
BP	GO:0042776	mitochondrial ATP synthesis coupled proton transport	17/1181	21/17653	4.47421e-17	3.74044e-15	3.11703e-15	ATP5F1B/ATP5F1A/STOML2/ATP5PF/ATP5F1C/ATP5PO/CYC1/ATP5PD/COX5B/ATP5PB/ATP5F1D/ATP5MF/ATP8/ATP5ME/ATP6/ATP5F1E/ATP5MG	17
BP	GO:0007007	inner mitochondrial membrane organization	23/1181	41/17653	4.95633e-17	4.07556e-15	3.3963e-15	ATP5F1B/ATP5F1A/LETM1/ATP5PF/OPA1/ATP5F1C/ATP5PO/TIMM13/ATP5PD/AGK/ATP5PB/ATP5F1D/DNAJC11/APOO/ATP5MF/AFG3L2/ATP8/ATP5ME/ATP6/IMMT/C19orf70/ATP5F1E/ATP5MG	23
BP	GO:0007006	mitochondrial membrane organization	40/1181	132/17653	1.50875e-16	1.22063e-14	1.01719e-14	ATP5F1B/ATP5F1A/ACAA2/SLC25A5/SLC25A6/HSPA1A/LETM1/ATP5IF1/ATP5PF/OPA1/ATP5F1C/ATP5PO/TIMM50/HSP90AA1/TIMM13/PPIF/ATP5PD/TOMM20/AGK/ATP5PB/YWHAZ/CNP/TOMM22/ATP5F1D/DNAJC11/APOO/ATP5MF/YWHAB/AFG3L2/ATP8/ATP5ME/HIP1R/ATP6/IMMT/C19orf70/ATP5F1E/TOMM7/ATP5MG/BID/DYNLL1	40
BP	GO:0006986	response to unfolded protein	47/1181	179/17653	1.84237e-16	1.46687e-14	1.22239e-14	HSPD1/HSPA5/HSP90B1/HSPA9/CALR/VCP/HSPA8/ACADVL/UGGT1/PDIA6/AGR2/HYOU1/ERO1A/PTPN1/ERP44/HSPA1A/HSPA1B/FAF2/TPP1/VAPB/SERPINH1/RACK1/HSPE1/HSP90AA1/LMNA/HSP90AB1/DNAJB11/SEC63/MYDGF/SSR1/SEC61A1/HDGF/DNAJC3/SRPRB/ATP6V0D1/SEC62/WFS1/HSPB1/TMEM33/GOSR2/UBXN4/TBL2/DERL2/ARFGAP1/YIF1A/DERL1/SYVN1	47
BP	GO:1902600	proton transmembrane transport	42/1181	146/17653	2.13232e-16	1.6712e-14	1.39267e-14	ATP5F1B/ACTN4/ATP5F1A/ATP1A1/STOML2/SLC25A3/ATP5PF/NNT/ATP5F1C/ATP5PO/COX6B1/COX2/COX5A/CYC1/PPIF/ATP5PD/COX5B/ATP5PB/COX4I1/CYB5A/ATP5F1D/SLC25A22/PARK7/C15orf48/COX7A2/ATP5MF/COX6A1/ATP6V0D1/COX7A2L/COX6C/COX7B/COX1/ATP8/ATP5ME/ATP6V0A1/ATP6/COX17/ATP5F1E/ATP5MG/NDUFA4/COX3/COX7C	42
BP	GO:0045652	regulation of megakaryocyte differentiation	30/1181	76/17653	2.62892e-16	2.02872e-14	1.6906e-14	HIST1H3A/HIST1H3D/HIST1H3C/HIST1H3E/HIST1H3I/HIST1H3G/HIST1H3J/HIST1H3H/HIST1H3B/HIST1H3F/H3F3A/H3F3B/HIST1H4I/HIST1H4A/HIST1H4D/HIST1H4F/HIST1H4K/HIST1H4J/HIST1H4C/HIST1H4H/HIST1H4B/HIST1H4E/HIST1H4L/HIST2H4A/HIST4H4/HIST2H4B/HIST2H3C/HIST2H3A/HIST2H3D/DPY30	30
BP	GO:0042407	cristae formation	20/1181	32/17653	2.88041e-16	2.18911e-14	1.82426e-14	ATP5F1B/ATP5F1A/LETM1/ATP5PF/ATP5F1C/ATP5PO/ATP5PD/ATP5PB/ATP5F1D/DNAJC11/APOO/ATP5MF/AFG3L2/ATP8/ATP5ME/ATP6/IMMT/C19orf70/ATP5F1E/ATP5MG	20
BP	GO:0035966	response to topologically incorrect protein	49/1181	198/17653	5.60738e-16	4.19801e-14	3.49834e-14	HSPD1/HSPA5/HSP90B1/HSPA9/CALR/VCP/HSPA8/ACADVL/UGGT1/PDIA6/AGR2/HYOU1/ERO1A/PTPN1/ERP44/HSPA1A/HSPA1B/FAF2/TPP1/VAPB/SERPINH1/RACK1/HSPE1/HSP90AA1/LMNA/HSP90AB1/DNAJB11/SEC63/MYDGF/SSR1/SEC61A1/HDGF/DNAJC3/SRPRB/ATP6V0D1/SEC62/WFS1/HSPB1/TMEM33/GOSR2/UBXN4/TOR1A/TBL2/DERL2/ARFGAP1/YIF1A/DERL1/SDF2L1/SYVN1	49
BP	GO:0051291	protein heterooligomerization	38/1181	124/17653	5.72083e-16	4.21995e-14	3.51663e-14	ANXA2/CTNNA1/JUP/GNB1/MCCC2/XRCC6/HIST1H3A/HIST1H3D/HIST1H3C/HIST1H3E/HIST1H3I/HIST1H3G/HIST1H3J/HIST1H3H/HIST1H3B/HIST1H3F/ITPR3/MCCC1/HIST1H4I/HIST1H4A/HIST1H4D/HIST1H4F/HIST1H4K/HIST1H4J/HIST1H4C/HIST1H4H/HIST1H4B/HIST1H4E/HIST1H4L/HIST2H4A/HIST4H4/HIST2H4B/YWHAB/HSD17B8/SEPT7/NUDT21/SEPT9/S100A10	38
BP	GO:0060964	regulation of gene silencing by miRNA	35/1181	107/17653	8.48404e-16	6.16753e-14	5.1396e-14	EGFR/DHX9/HIST1H3A/HIST1H3D/HIST1H3C/HIST1H3E/HIST1H3I/HIST1H3G/HIST1H3J/HIST1H3H/HIST1H3B/HIST1H3F/DDX5/ELAVL1/H3F3A/H3F3B/HIST1H4I/HIST1H4A/HIST1H4D/HIST1H4F/HIST1H4K/HIST1H4J/HIST1H4C/HIST1H4H/HIST1H4B/HIST1H4E/HIST1H4L/HIST2H4A/HIST4H4/HIST2H4B/HIST2H3C/HIST2H3A/HIST2H3D/NUP155/AAAS	35
BP	GO:0032200	telomere organization	45/1181	172/17653	9.3833e-16	6.72381e-14	5.60317e-14	HNRNPA2B1/HNRNPA1/HNRNPU/XRCC5/XRCC6/HNRNPC/HNRNPD/HIST1H3A/HIST1H3D/HIST1H3C/HIST1H3E/HIST1H3I/HIST1H3G/HIST1H3J/HIST1H3H/HIST1H3B/HIST1H3F/CTNNB1/HSP90AA1/HSP90AB1/H3F3A/H3F3B/PRKDC/HIST1H4I/HIST1H4A/HIST1H4D/HIST1H4F/HIST1H4K/HIST1H4J/HIST1H4C/HIST1H4H/HIST1H4B/HIST1H4E/HIST1H4L/HIST2H4A/HIST4H4/HIST2H4B/RPA2/SRC/TCP1/CCT3/PML/PARP1/DKC1/GAR1	45
BP	GO:0043484	regulation of RNA splicing	37/1181	120/17653	1.11056e-15	7.84587e-14	6.53822e-14	AHNAK/HSPA8/HNRNPA2B1/HNRNPA1/HNRNPK/HNRNPL/HNRNPU/PTBP1/HSPA1A/HNRNPF/C1QBP/HNRNPH1/DDX5/SRSF1/DDX17/KHDRBS1/SRSF7/U2AF2/SRSF3/SRSF6/DAZAP1/RPS26/SRSF4/RBMX/PTBP3/THRAP3/SRSF2/RBM25/SF3B4/AHNAK2/RPS13/RBM4/EFCAB5/SRSF9/MBNL1/RBM17/SNRNP70	37
BP	GO:0006101	citrate metabolic process	20/1181	34/17653	1.56028e-15	1.08699e-13	9.05827e-14	ACO2/MDH2/SDHA/FH/OGDH/DLD/DLST/CS/IDH3A/DLAT/NNT/IDH3B/PDHA1/IDH2/SUCLG1/SUCLG2/PDHB/SDHB/IDH3G/SUCLA2	20
BP	GO:0006397	mRNA processing	84/1181	495/17653	1.62927e-15	1.11951e-13	9.32926e-14	HSPA8/HNRNPA2B1/HNRNPA1/HNRNPK/HNRNPL/HNRNPU/PTBP1/HNRNPH2/PABPC1/YBX1/HSPA1A/HNRNPA3/SYNCRIP/HNRNPC/HNRNPM/HNRNPF/C1QBP/DHX9/DDX39B/NONO/DDX39A/HNRNPD/HNRNPH1/HNRNPR/KHSRP/SFPQ/DDX5/SRSF1/FUS/DDX17/HNRNPA0/KHDRBS1/ELAVL1/TARDBP/PCBP1/SRSF7/U2AF2/HNRNPH3/SRSF3/SNRPD3/SF1/PCBP2/DDX1/SRSF6/SNRPD1/SNRPD2/DAZAP1/LGALS3/SF3B1/SRSF4/RBMX/GRSF1/PTBP3/THRAP3/SRSF2/U2AF1/U2AF1L5/SAFB2/RBM25/MTPAP/RBM39/SR…	84
BP	GO:0072350	tricarboxylic acid metabolic process	21/1181	38/17653	1.7465e-15	1.18384e-13	9.86534e-14	ACO2/MDH2/SDHA/GLUD1/FH/OGDH/DLD/DLST/CS/IDH3A/DLAT/NNT/IDH3B/PDHA1/IDH2/SUCLG1/SUCLG2/PDHB/SDHB/IDH3G/SUCLA2	21
BP	GO:0060147	regulation of posttranscriptional gene silencing	35/1181	111/17653	3.04996e-15	2.01297e-13	1.67748e-13	EGFR/DHX9/HIST1H3A/HIST1H3D/HIST1H3C/HIST1H3E/HIST1H3I/HIST1H3G/HIST1H3J/HIST1H3H/HIST1H3B/HIST1H3F/DDX5/ELAVL1/H3F3A/H3F3B/HIST1H4I/HIST1H4A/HIST1H4D/HIST1H4F/HIST1H4K/HIST1H4J/HIST1H4C/HIST1H4H/HIST1H4B/HIST1H4E/HIST1H4L/HIST2H4A/HIST4H4/HIST2H4B/HIST2H3C/HIST2H3A/HIST2H3D/NUP155/AAAS	35
BP	GO:0060966	regulation of gene silencing by RNA	35/1181	111/17653	3.04996e-15	2.01297e-13	1.67748e-13	EGFR/DHX9/HIST1H3A/HIST1H3D/HIST1H3C/HIST1H3E/HIST1H3I/HIST1H3G/HIST1H3J/HIST1H3H/HIST1H3B/HIST1H3F/DDX5/ELAVL1/H3F3A/H3F3B/HIST1H4I/HIST1H4A/HIST1H4D/HIST1H4F/HIST1H4K/HIST1H4J/HIST1H4C/HIST1H4H/HIST1H4B/HIST1H4E/HIST1H4L/HIST2H4A/HIST4H4/HIST2H4B/HIST2H3C/HIST2H3A/HIST2H3D/NUP155/AAAS	35
BP	GO:0015985	energy coupled proton transport, down electrochemical gradient	18/1181	28/17653	4.39558e-15	2.8267e-13	2.35558e-13	ATP5F1B/ATP5F1A/STOML2/ATP5PF/ATP5F1C/ATP5PO/CYC1/ATP5PD/COX5B/ATP5PB/ATP5F1D/ATP5MF/ATP8/ATP5ME/ATP6V0A1/ATP6/ATP5F1E/ATP5MG	18
BP	GO:0015986	ATP synthesis coupled proton transport	18/1181	28/17653	4.39558e-15	2.8267e-13	2.35558e-13	ATP5F1B/ATP5F1A/STOML2/ATP5PF/ATP5F1C/ATP5PO/CYC1/ATP5PD/COX5B/ATP5PB/ATP5F1D/ATP5MF/ATP8/ATP5ME/ATP6V0A1/ATP6/ATP5F1E/ATP5MG	18
BP	GO:0044282	small molecule catabolic process	75/1181	425/17653	6.80118e-15	4.31832e-13	3.5986e-13	HADHA/ALDH2/PKM/ETFA/GOT2/GLUD1/ACADVL/ACAA2/GPD2/HSD17B10/PCK2/HADHB/ENO1/OGDH/DLD/GAPDH/DLST/MCCC2/OXCT1/OAT/ETFB/ALDH7A1/PGK1/GLS/ECHS1/HIBADH/CPT2/PCYOX1/CD44/ECI1/HK1/SCP2/ALDH3A2/HADH/ALDH1B1/BCAT2/ECH1/ACAT1/HMGCL/ACAD9/ALDOA/ATP2B4/ALDH4A1/CYP4F3/HSD17B4/MCCC1/HPDL/IVD/BCKDHA/ETFDH/CPT1A/ABHD10/DECR1/BDH1/GCDH/ACAA1/CYP4F11/NDUFAB1/ACADM/ADPGK/BCKDHB/ACOX1/ACADSB/MECR/ACADS/ACOT8/DBT/ACAD…	75
BP	GO:0006732	coenzyme metabolic process	69/1181	380/17653	1.98577e-14	1.24508e-12	1.03757e-12	VCP/PKM/MDH2/SHMT2/GPD2/CYB5R3/PCK2/ENO1/OGDH/DLD/ACSL5/GAPDH/ME2/DLST/MCCC2/DLAT/ACOT9/PGK1/HK1/ACSF2/ATP5IF1/ACSL3/NNT/PDHA1/ACAT1/PC/SLC2A1/ACSL4/IDH2/SUCLG1/HMGCL/SUCLG2/PDHB/ALDOA/HSD17B12/LDHA/CYB5A/MTHFD2/HSD17B4/MCCC1/COQ9/SLC25A1/COASY/PDPR/PPT1/GCDH/TECR/CYP4F11/FDXR/PDHX/MTHFD1/ACSS1/PNPO/ADPGK/SUCLA2/MPC1/NUP155/HSD17B8/COQ6/TKT/SLC25A32/AAAS/ELOVL1/ACOT8/DBT/TPI1/DCXR/MTHFD1L/KYNU	69
BP	GO:0006631	fatty acid metabolic process	68/1181	372/17653	2.1996e-14	1.36212e-12	1.1351e-12	HADHA/ETFA/ACADVL/ACAA2/POR/PCK2/HADHB/DLD/ACSL5/PON2/ETFB/DLAT/CYP2S1/ECHS1/CPT2/ECI1/SCP2/ACSF2/ALDH3A2/HADH/SCARB2/ACSL3/MGLL/PDHA1/ECH1/ACAT1/ACSL4/ACAD9/PDHB/HSD17B12/HACD3/CYP4F3/HSD17B4/IVD/ETFDH/CPT1A/PDPR/CES1/DECR1/ANXA1/CEACAM1/ERLIN2/GCDH/ACAA1/TECR/CYP4F11/NDUFAB1/CAV1/ERLIN1/PDHX/ACADM/PTGES/ACSS1/PTGES2/ACOX1/ACADSB/SGPL1/HSD17B8/CBR1/MECR/ACADS/ZADH2/MIF/NDUFS6/ELOVL1/ACOT8/GPX1/N…	68
BP	GO:0060968	regulation of gene silencing	37/1181	133/17653	4.2023e-14	2.57058e-12	2.14215e-12	EGFR/DHX9/HIST1H3A/HIST1H3D/HIST1H3C/HIST1H3E/HIST1H3I/HIST1H3G/HIST1H3J/HIST1H3H/HIST1H3B/HIST1H3F/DDX5/ELAVL1/H3F3A/H3F3B/TRIM28/HIST1H4I/HIST1H4A/HIST1H4D/HIST1H4F/HIST1H4K/HIST1H4J/HIST1H4C/HIST1H4H/HIST1H4B/HIST1H4E/HIST1H4L/HIST2H4A/HIST4H4/HIST2H4B/HIST2H3C/HIST2H3A/HIST2H3D/NUP155/AAAS/HMGA1	37
BP	GO:0043648	dicarboxylic acid metabolic process	33/1181	108/17653	5.22479e-14	3.15754e-12	2.63128e-12	MDH2/SHMT2/SDHA/GOT2/GLUD1/FH/PCK2/ALDH18A1/OGDH/DLD/ME2/DLST/OAT/GLS/ME3/CPOX/IDH2/SUCLG1/SUCLG2/SDHB/ALDH4A1/MTHFD2/MTHFD1/SUCLA2/L2HGDH/MRPS36/GRHPR/SLC25A32/DGLUCY/ACOT8/MTHFD1L/KYNU/PRODH2	33
BP	GO:1902036	regulation of hematopoietic stem cell differentiation	32/1181	103/17653	7.49551e-14	4.47589e-12	3.72991e-12	HSPA9/HIST1H3A/HIST1H3D/HIST1H3C/HIST1H3E/HIST1H3I/HIST1H3G/HIST1H3J/HIST1H3H/HIST1H3B/HIST1H3F/H3F3A/H3F3B/UBA52/HIST1H4I/HIST1H4A/HIST1H4D/HIST1H4F/HIST1H4K/HIST1H4J/HIST1H4C/HIST1H4H/HIST1H4B/HIST1H4E/HIST1H4L/HIST2H4A/HIST4H4/HIST2H4B/HIST2H3C/HIST2H3A/HIST2H3D/PSME2	32
BP	GO:0045653	negative regulation of megakaryocyte differentiation	14/1181	18/17653	7.93825e-14	4.6845e-12	3.90375e-12	HIST1H4I/HIST1H4A/HIST1H4D/HIST1H4F/HIST1H4K/HIST1H4J/HIST1H4C/HIST1H4H/HIST1H4B/HIST1H4E/HIST1H4L/HIST2H4A/HIST4H4/HIST2H4B	14
BP	GO:0009083	branched-chain amino acid catabolic process	15/1181	21/17653	8.18785e-14	4.77561e-12	3.97968e-12	HSD17B10/DLD/MCCC2/HIBADH/BCAT2/ACAT1/HMGCL/MCCC1/IVD/BCKDHA/BCKDHB/ACADSB/DBT/ACAD8/ALDH6A1	15
BP	GO:0030219	megakaryocyte differentiation	30/1181	93/17653	1.47753e-13	8.51874e-12	7.09895e-12	HIST1H3A/HIST1H3D/HIST1H3C/HIST1H3E/HIST1H3I/HIST1H3G/HIST1H3J/HIST1H3H/HIST1H3B/HIST1H3F/H3F3A/H3F3B/HIST1H4I/HIST1H4A/HIST1H4D/HIST1H4F/HIST1H4K/HIST1H4J/HIST1H4C/HIST1H4H/HIST1H4B/HIST1H4E/HIST1H4L/HIST2H4A/HIST4H4/HIST2H4B/HIST2H3C/HIST2H3A/HIST2H3D/DPY30	30
BP	GO:0016999	antibiotic metabolic process	37/1181	139/17653	1.8938e-13	1.07947e-11	8.99556e-12	ACO2/ALDH2/MDH2/SDHA/FH/PCK2/OGDH/DLD/DLST/CS/IDH3A/MAOB/PRDX3/DLAT/EGFR/PRDX5/NNT/IDH3B/ALDH1B1/PDHA1/IDH2/SUCLG1/RAC1/SUCLG2/PDHB/SDHB/RAC2/PRDX1/ST3GAL1/CAT/PARK7/IDH3G/ACSS1/SUCLA2/CYBA/GPX1/MTHFD1L	37
BP	GO:0060218	hematopoietic stem cell differentiation	33/1181	113/17653	2.20136e-13	1.24068e-11	1.0339e-11	HSPA9/XRCC5/HIST1H3A/HIST1H3D/HIST1H3C/HIST1H3E/HIST1H3I/HIST1H3G/HIST1H3J/HIST1H3H/HIST1H3B/HIST1H3F/H3F3A/H3F3B/UBA52/HIST1H4I/HIST1H4A/HIST1H4D/HIST1H4F/HIST1H4K/HIST1H4J/HIST1H4C/HIST1H4H/HIST1H4B/HIST1H4E/HIST1H4L/HIST2H4A/HIST4H4/HIST2H4B/HIST2H3C/HIST2H3A/HIST2H3D/PSME2	33
BP	GO:0006414	translational elongation	36/1181	134/17653	2.96058e-13	1.65003e-11	1.37503e-11	TUFM/EEF1A1/EEF2/EIF5A/RACK1/RPLP2/GFM1/MRPL12/TSFM/EEF1D/MRPS31/EEF1G/MRPL28/MRPL50/MRPL37/MRPS27/PTCD3/MRPL52/MRPS22/MRPL2/MRPL41/MRPL46/MRPS35/MRPS36/MRPL4/RPLP1/MRPS17/DAP3/MRPS16/MRPS18B/EEF1B2/MRPS23/MRPL19/MRPL10/MRPS26/MRPS15	36
BP	GO:0140053	mitochondrial gene expression	39/1181	155/17653	3.04491e-13	1.67838e-11	1.39865e-11	LRPPRC/IARS2/TUFM/HSD17B10/C1QBP/GFM1/MRPL12/TSFM/MRPS31/MRPL28/MRPL50/MRPL37/MRPS27/PTCD3/MRPL52/MRPS22/MRPL2/ELAC2/MRPL41/MRPL46/FASTKD5/MRPS35/MRPS36/GATB/DARS2/MRPL4/MRPS17/GFM2/TBRG4/DAP3/MRPS16/TRMT10C/MRPS18B/MRPS23/MRPL19/NDUFA7/MRPL10/MRPS26/MRPS15	39
BP	GO:0034620	cellular response to unfolded protein	38/1181	149/17653	3.88326e-13	2.11722e-11	1.76435e-11	HSPA5/HSP90B1/HSPA9/CALR/VCP/HSPA8/ACADVL/UGGT1/PDIA6/AGR2/HYOU1/ERO1A/PTPN1/HSPA1A/HSPA1B/TPP1/VAPB/RACK1/LMNA/DNAJB11/SEC63/MYDGF/SSR1/SEC61A1/HDGF/DNAJC3/SRPRB/ATP6V0D1/SEC62/WFS1/TMEM33/GOSR2/TBL2/DERL2/ARFGAP1/YIF1A/DERL1/SYVN1	38
BP	GO:0006635	fatty acid beta-oxidation	26/1181	73/17653	4.48663e-13	2.41988e-11	2.01657e-11	HADHA/ETFA/ACADVL/ACAA2/HADHB/ETFB/ECHS1/CPT2/ECI1/SCP2/HADH/ECH1/ACAT1/HSD17B4/IVD/ETFDH/CPT1A/DECR1/GCDH/ACAA1/NDUFAB1/ACADM/ACOX1/MECR/ACADS/ACOT8	26
BP	GO:0006637	acyl-CoA metabolic process	31/1181	103/17653	4.78998e-13	2.52911e-11	2.10759e-11	OGDH/DLD/ACSL5/DLST/DLAT/ACOT9/ACSF2/ACSL3/PDHA1/ACAT1/ACSL4/SUCLG1/HMGCL/SUCLG2/PDHB/HSD17B12/HSD17B4/SLC25A1/PDPR/PPT1/GCDH/TECR/PDHX/ACSS1/SUCLA2/MPC1/HSD17B8/ELOVL1/ACOT8/DBT/KYNU	31
BP	GO:0035383	thioester metabolic process	31/1181	103/17653	4.78998e-13	2.52911e-11	2.10759e-11	OGDH/DLD/ACSL5/DLST/DLAT/ACOT9/ACSF2/ACSL3/PDHA1/ACAT1/ACSL4/SUCLG1/HMGCL/SUCLG2/PDHB/HSD17B12/HSD17B4/SLC25A1/PDPR/PPT1/GCDH/TECR/PDHX/ACSS1/SUCLA2/MPC1/HSD17B8/ELOVL1/ACOT8/DBT/KYNU	31
BP	GO:0048024	regulation of mRNA splicing, via spliceosome	27/1181	79/17653	5.03484e-13	2.6307e-11	2.19225e-11	HSPA8/HNRNPA2B1/HNRNPA1/HNRNPK/HNRNPL/HNRNPU/PTBP1/C1QBP/DDX5/DDX17/KHDRBS1/SRSF7/U2AF2/SRSF3/SRSF6/DAZAP1/SRSF4/RBMX/THRAP3/SRSF2/RBM25/SF3B4/RBM4/EFCAB5/SRSF9/MBNL1/SNRNP70	27
BP	GO:0006342	chromatin silencing	34/1181	123/17653	5.527e-13	2.85808e-11	2.38174e-11	HIST1H3A/HIST1H3D/HIST1H3C/HIST1H3E/HIST1H3I/HIST1H3G/HIST1H3J/HIST1H3H/HIST1H3B/HIST1H3F/HIST1H2AE/HIST1H2AB/H3F3A/H3F3B/TRIM28/HIST1H4I/HIST1H4A/HIST1H4D/HIST1H4F/HIST1H4K/HIST1H4J/HIST1H4C/HIST1H4H/HIST1H4B/HIST1H4E/HIST1H4L/HIST2H4A/HIST4H4/HIST2H4B/HIST2H3C/HIST2H3A/HIST2H3D/DPY30/HMGA1	34
BP	GO:0030968	endoplasmic reticulum unfolded protein response	35/1181	130/17653	5.90626e-13	2.99251e-11	2.49375e-11	HSPA5/HSP90B1/CALR/VCP/ACADVL/UGGT1/PDIA6/AGR2/HYOU1/ERO1A/PTPN1/HSPA1A/TPP1/VAPB/RACK1/LMNA/DNAJB11/SEC63/MYDGF/SSR1/SEC61A1/HDGF/DNAJC3/SRPRB/ATP6V0D1/SEC62/WFS1/TMEM33/GOSR2/TBL2/DERL2/ARFGAP1/YIF1A/DERL1/SYVN1	35
BP	GO:0032543	mitochondrial translation	35/1181	130/17653	5.90626e-13	2.99251e-11	2.49375e-11	LRPPRC/IARS2/TUFM/C1QBP/GFM1/MRPL12/TSFM/MRPS31/MRPL28/MRPL50/MRPL37/MRPS27/PTCD3/MRPL52/MRPS22/MRPL2/MRPL41/MRPL46/MRPS35/MRPS36/GATB/DARS2/MRPL4/MRPS17/GFM2/DAP3/MRPS16/TRMT10C/MRPS18B/MRPS23/MRPL19/NDUFA7/MRPL10/MRPS26/MRPS15	35
BP	GO:0035967	cellular response to topologically incorrect protein	40/1181	166/17653	6.90818e-13	3.46514e-11	2.88762e-11	HSPA5/HSP90B1/HSPA9/CALR/VCP/HSPA8/ACADVL/UGGT1/PDIA6/AGR2/HYOU1/ERO1A/PTPN1/HSPA1A/HSPA1B/TPP1/VAPB/RACK1/LMNA/DNAJB11/SEC63/MYDGF/SSR1/SEC61A1/HDGF/DNAJC3/SRPRB/ATP6V0D1/SEC62/WFS1/TMEM33/GOSR2/TOR1A/TBL2/DERL2/ARFGAP1/YIF1A/DERL1/SDF2L1/SYVN1	40
BP	GO:0036498	IRE1-mediated unfolded protein response	25/1181	69/17653	8.07245e-13	4.00905e-11	3.34088e-11	HSPA5/ACADVL/PDIA6/AGR2/HYOU1/PTPN1/HSPA1A/TPP1/LMNA/DNAJB11/SEC63/MYDGF/SSR1/SEC61A1/HDGF/DNAJC3/SRPRB/ATP6V0D1/SEC62/WFS1/TMEM33/GOSR2/ARFGAP1/YIF1A/SYVN1	25
BP	GO:1901532	regulation of hematopoietic progenitor cell differentiation	32/1181	112/17653	9.87362e-13	4.8555e-11	4.04625e-11	HSPA9/HIST1H3A/HIST1H3D/HIST1H3C/HIST1H3E/HIST1H3I/HIST1H3G/HIST1H3J/HIST1H3H/HIST1H3B/HIST1H3F/H3F3A/H3F3B/UBA52/HIST1H4I/HIST1H4A/HIST1H4D/HIST1H4F/HIST1H4K/HIST1H4J/HIST1H4C/HIST1H4H/HIST1H4B/HIST1H4E/HIST1H4L/HIST2H4A/HIST4H4/HIST2H4B/HIST2H3C/HIST2H3A/HIST2H3D/PSME2	32
BP	GO:1903311	regulation of mRNA metabolic process	55/1181	289/17653	1.31926e-12	6.42469e-11	5.35391e-11	HSPA8/HNRNPA2B1/HNRNPA1/HNRNPK/NPM1/HNRNPL/HNRNPU/PTBP1/VIM/PABPC1/YBX1/HSPA1A/SYNCRIP/HNRNPC/SET/C1QBP/DHX9/PABPC4/HNRNPD/HNRNPR/KHSRP/IGF2BP3/DDX5/DDX17/HNRNPA0/KHDRBS1/ELAVL1/TARDBP/SRSF7/U2AF2/SRSF3/YWHAZ/SERBP1/UBA52/ANP32A/SRSF6/DAZAP1/IGF2BP2/SRSF4/YWHAB/RBMX/THRAP3/SRSF2/SAFB2/HSPB1/RBM25/SF3B4/TBRG4/NUDT21/RBM4/EFCAB5/SRSF9/MBNL1/SNRNP70/PSME2	55
BP	GO:0009081	branched-chain amino acid metabolic process	15/1181	24/17653	1.62881e-12	7.85589e-11	6.54657e-11	HSD17B10/DLD/MCCC2/HIBADH/BCAT2/ACAT1/HMGCL/MCCC1/IVD/BCKDHA/BCKDHB/ACADSB/DBT/ACAD8/ALDH6A1	15
BP	GO:0006123	mitochondrial electron transport, cytochrome c to oxygen	14/1181	21/17653	2.49213e-12	1.17929e-10	9.82744e-11	COX6B1/COX2/CYCS/COX5A/COX5B/COX4I1/COX6A1/COX7A2L/COX6C/COX7B/COX1/NDUFA4/COX3/COX7C	14
BP	GO:0019646	aerobic electron transport chain	14/1181	21/17653	2.49213e-12	1.17929e-10	9.82744e-11	COX6B1/COX2/CYCS/COX5A/COX5B/COX4I1/COX6A1/COX7A2L/COX6C/COX7B/COX1/NDUFA4/COX3/COX7C	14
BP	GO:0009062	fatty acid catabolic process	31/1181	110/17653	3.33164e-12	1.56182e-10	1.30152e-10	HADHA/ETFA/ACADVL/ACAA2/PCK2/HADHB/ETFB/ECHS1/CPT2/ECI1/SCP2/ALDH3A2/HADH/ECH1/ACAT1/ACAD9/CYP4F3/HSD17B4/IVD/ETFDH/CPT1A/DECR1/GCDH/ACAA1/NDUFAB1/ACADM/ACOX1/MECR/ACADS/ACOT8/NUDT19	31
BP	GO:2001242	regulation of intrinsic apoptotic signaling pathway	38/1181	159/17653	3.40518e-12	1.58152e-10	1.31793e-10	P4HB/HNRNPK/HYOU1/ENO1/SOD2/PTPN1/VDAC2/TRAP1/HSPA1A/BCAP31/CD44/NONO/SFPQ/OPA1/RACK1/NDUFS3/ERP29/PPIF/RPS7/RPS3/PARK7/DDX3X/MUC1/RPL26/FIS1/CAV1/WFS1/SRC/HSPB1/HTRA2/BCL2L2/MIF/TXNDC12/PARP1/GPX1/BID/SYVN1/BCLAF1	38
BP	GO:0006334	nucleosome assembly	36/1181	146/17653	4.7327e-12	2.17791e-10	1.81493e-10	NPM1/SET/HIST1H3A/HIST1H3D/HIST1H3C/HIST1H3E/HIST1H3I/HIST1H3G/HIST1H3J/HIST1H3H/HIST1H3B/HIST1H3F/HIST2H2BF/H3F3A/H3F3B/HIST1H4I/HIST1H4A/HIST1H4D/HIST1H4F/HIST1H4K/HIST1H4J/HIST1H4C/HIST1H4H/HIST1H4B/HIST1H4E/HIST1H4L/HIST2H4A/HIST4H4/HIST2H4B/HIST2H3C/HIST2H3A/HIST2H3D/HIST1H1B/HIST1H1D/H1F0/HP1BP3	36
BP	GO:0070125	mitochondrial translational elongation	27/1181	87/17653	6.83329e-12	3.11598e-10	2.59665e-10	TUFM/GFM1/MRPL12/TSFM/MRPS31/MRPL28/MRPL50/MRPL37/MRPS27/PTCD3/MRPL52/MRPS22/MRPL2/MRPL41/MRPL46/MRPS35/MRPS36/MRPL4/MRPS17/DAP3/MRPS16/MRPS18B/MRPS23/MRPL19/MRPL10/MRPS26/MRPS15	27
BP	GO:2000736	regulation of stem cell differentiation	35/1181	141/17653	7.6197e-12	3.44328e-10	2.8694e-10	HSPA9/HNRNPU/TACSTD2/HIST1H3A/HIST1H3D/HIST1H3C/HIST1H3E/HIST1H3I/HIST1H3G/HIST1H3J/HIST1H3H/HIST1H3B/HIST1H3F/OCIAD1/H3F3A/H3F3B/UBA52/HIST1H4I/HIST1H4A/HIST1H4D/HIST1H4F/HIST1H4K/HIST1H4J/HIST1H4C/HIST1H4H/HIST1H4B/HIST1H4E/HIST1H4L/HIST2H4A/HIST4H4/HIST2H4B/HIST2H3C/HIST2H3A/HIST2H3D/PSME2	35
BP	GO:0045814	negative regulation of gene expression, epigenetic	34/1181	138/17653	1.89599e-11	8.49133e-10	7.07611e-10	HIST1H3A/HIST1H3D/HIST1H3C/HIST1H3E/HIST1H3I/HIST1H3G/HIST1H3J/HIST1H3H/HIST1H3B/HIST1H3F/HIST1H2AE/HIST1H2AB/H3F3A/H3F3B/TRIM28/HIST1H4I/HIST1H4A/HIST1H4D/HIST1H4F/HIST1H4K/HIST1H4J/HIST1H4C/HIST1H4H/HIST1H4B/HIST1H4E/HIST1H4L/HIST2H4A/HIST4H4/HIST2H4B/HIST2H3C/HIST2H3A/HIST2H3D/DPY30/HMGA1	34
BP	GO:0050684	regulation of mRNA processing	31/1181	117/17653	1.94861e-11	8.64977e-10	7.20814e-10	HSPA8/HNRNPA2B1/HNRNPA1/HNRNPK/HNRNPL/HNRNPU/PTBP1/HSPA1A/C1QBP/DHX9/DDX5/DDX17/KHDRBS1/SRSF7/U2AF2/SRSF3/SRSF6/DAZAP1/SRSF4/RBMX/THRAP3/SRSF2/SAFB2/RBM25/SF3B4/NUDT21/RBM4/EFCAB5/SRSF9/MBNL1/SNRNP70	31
BP	GO:0022618	ribonucleoprotein complex assembly	43/1181	211/17653	3.79919e-11	1.67164e-09	1.39304e-09	NPM1/C1QBP/RPL3/DHX9/DDX39B/RPSA/RPL6/SRSF1/RPL12/HSP90AA1/HSP90AB1/SNRPD3/SF1/DDX1/SRSF6/SNRPD1/SNRPD2/RPS10/RPL10/RPL5/SF3B1/RPL11/DDX3X/RPS28/RPS14/RPS19/RBMX/EIF4B/RPL13A/RPL23A/RPS5/SNRPB/RPL38/SCAF11/SNRPC/G3BP2/SNRNP200/RPL24/DDX6/RPS15/MDN1/SRSF9/ATXN2L	43
BP	GO:0031497	chromatin assembly	37/1181	164/17653	4.03832e-11	1.76141e-09	1.46784e-09	NPM1/SET/HIST1H3A/HIST1H3D/HIST1H3C/HIST1H3E/HIST1H3I/HIST1H3G/HIST1H3J/HIST1H3H/HIST1H3B/HIST1H3F/HIST2H2BF/H3F3A/H3F3B/HIST1H4I/HIST1H4A/HIST1H4D/HIST1H4F/HIST1H4K/HIST1H4J/HIST1H4C/HIST1H4H/HIST1H4B/HIST1H4E/HIST1H4L/HIST2H4A/HIST4H4/HIST2H4B/HIST2H3C/HIST2H3A/HIST2H3D/HIST1H1B/HIST1H1D/H1F0/HP1BP3/HMGA1	37
BP	GO:0019395	fatty acid oxidation	28/1181	100/17653	4.39121e-11	1.89685e-09	1.58071e-09	HADHA/ETFA/ACADVL/ACAA2/POR/HADHB/ETFB/ECHS1/CPT2/ECI1/SCP2/ALDH3A2/HADH/ECH1/ACAT1/HSD17B4/IVD/ETFDH/CPT1A/DECR1/GCDH/ACAA1/NDUFAB1/ACADM/ACOX1/MECR/ACADS/ACOT8	28
BP	GO:0006754	ATP biosynthetic process	34/1181	142/17653	4.42447e-11	1.89685e-09	1.58071e-09	ATP5F1B/VCP/PKM/ATP5F1A/ENO1/OGDH/SLC25A13/GAPDH/PGK1/STOML2/HK1/ATP5PF/ATP5F1C/ATP5PO/CYC1/ATP5PD/ALDOA/COX5B/ATP5PB/LDHA/ATP5F1D/ATP5MF/NIPSNAP2/ADPGK/NUP155/ATP8/ATP5ME/ATP6V0A1/ATP6/PARP1/AAAS/TPI1/ATP5F1E/ATP5MG	34
BP	GO:0071826	ribonucleoprotein complex subunit organization	44/1181	223/17653	6.89793e-11	2.9322e-09	2.4435e-09	NPM1/C1QBP/RPL3/DHX9/DDX39B/RPSA/RPL6/SRSF1/RPL12/HSP90AA1/HSP90AB1/SNRPD3/SF1/DDX1/SRSF6/SNRPD1/SNRPD2/RPS10/RPL10/RPL5/SF3B1/RPL11/DDX3X/RPS28/RPS14/RPS19/RBMX/EIF4B/RPL13A/RPL23A/RPS5/SNRPB/RPL38/SCAF11/GFM2/SNRPC/G3BP2/SNRNP200/RPL24/DDX6/RPS15/MDN1/SRSF9/ATXN2L	44
BP	GO:2001233	regulation of apoptotic signaling pathway	62/1181	383/17653	6.97402e-11	2.93964e-09	2.4497e-09	PDIA3/ITGA6/P4HB/CTNNA1/ACAA2/HNRNPK/HYOU1/ENO1/SLC25A5/SOD2/PTPN1/VDAC2/TRAP1/HSPA1A/HSPA1B/BCAP31/CD44/NONO/ATP5IF1/SFPQ/OPA1/CTNNB1/RACK1/NDUFS3/LMNA/ERP29/PPIF/RPS7/PPP1CA/RPS3/YWHAZ/STX4/FAM162A/LGALS3/PARK7/DDX3X/ITGAV/MUC1/RPL26/YWHAB/FIS1/CAV1/WFS1/SRC/HSPB1/QARS/CTTN/HTRA2/BCL2L2/MFF/MIF/TXNDC12/HIP1R/SERPINE1/PML/PARP1/GPX1/TMBIM1/BID/SYVN1/DYNLL1/BCLAF1	62
BP	GO:0034440	lipid oxidation	28/1181	102/17653	7.35277e-11	3.07346e-09	2.56122e-09	HADHA/ETFA/ACADVL/ACAA2/POR/HADHB/ETFB/ECHS1/CPT2/ECI1/SCP2/ALDH3A2/HADH/ECH1/ACAT1/HSD17B4/IVD/ETFDH/CPT1A/DECR1/GCDH/ACAA1/NDUFAB1/ACADM/ACOX1/MECR/ACADS/ACOT8	28
BP	GO:0006520	cellular amino acid metabolic process	60/1181	367/17653	9.44376e-11	3.91487e-09	3.26239e-09	P4HB/SHMT2/IARS2/GOT2/GLUD1/HSD17B10/ERO1A/ALDH18A1/OGDH/DLD/PPA2/DLST/MCCC2/OAT/ALDH7A1/GLS/HIBADH/PCYOX1/P4HA1/BCAT2/PRDX4/CPOX/MPST/ACAT1/COMT/HMGCL/ATP2B4/ALDH4A1/PLOD3/MCCC1/SLC6A14/HPDL/IVD/BCKDHA/PLOD2/PARK7/GCDH/GATM/MTHFD1/QARS/PLOD1/VARS/SLC7A5/AGMAT/EPRS/BCKDHB/ACADSB/GATB/DARS2/SLC25A32/DGLUCY/SARS2/DBT/ACAD8/GCSH/NQO1/ALDH6A1/KYNU/PRODH2/PSME2	60
BP	GO:0070671	response to interleukin-12	19/1181	49/17653	1.14509e-10	4.70799e-09	3.92333e-09	HSPA9/P4HB/ANXA2/HNRNPA2B1/SOD2/MSN/HNRNPF/CDC42/RAP1B/CFL1/TICAM2/PPIA/RPLP0/RALA/HNRNPDL/TCP1/LMNB1/MIF/PSME2	19
BP	GO:0072329	monocarboxylic acid catabolic process	32/1181	132/17653	1.1641e-10	4.74727e-09	3.95605e-09	HADHA/ETFA/ACADVL/ACAA2/PCK2/HADHB/ETFB/ECHS1/CPT2/ECI1/SCP2/ALDH3A2/HADH/ECH1/ACAT1/ACAD9/CYP4F3/HSD17B4/IVD/ETFDH/CPT1A/DECR1/GCDH/ACAA1/NDUFAB1/ACADM/ACOX1/MECR/ACADS/ACOT8/DCXR/NUDT19	32
BP	GO:0009063	cellular amino acid catabolic process	30/1181	118/17653	1.25473e-10	5.07557e-09	4.22964e-09	GOT2/GLUD1/HSD17B10/OGDH/DLD/DLST/MCCC2/OAT/ALDH7A1/GLS/HIBADH/PCYOX1/BCAT2/ACAT1/HMGCL/ATP2B4/ALDH4A1/MCCC1/HPDL/IVD/BCKDHA/GCDH/BCKDHB/ACADSB/DBT/ACAD8/GCSH/ALDH6A1/KYNU/PRODH2	30
BP	GO:0019058	viral life cycle	54/1181	316/17653	1.54727e-10	6.20889e-09	5.17408e-09	P4HB/VCP/HSPA8/ITGB1/ITGA2/VAPA/PABPC1/HSPA1A/HSPA1B/TFRC/EGFR/EPHA2/RAB1A/RPSA/SCARB2/RAB1B/CDC42/ISG15/DDX5/VAPB/PPIB/PC/ILF3/MAVS/RAB7A/PCBP1/CD55/HSP90AB1/PPIA/SLC1A5/TRIM28/F11R/HACD3/UBA52/LAMP1/PCBP2/LGALS1/DDX3X/ITGAV/OAS1/KPNB1/CAV1/VAMP8/LDLR/NUP155/LAMTOR5/OAS2/BST2/PML/AAAS/DDX6/CTSB/OAS3/PVR	54
BP	GO:0071103	DNA conformation change	51/1181	292/17653	2.25597e-10	8.98093e-09	7.48411e-09	AIFM1/HNRNPA2B1/NPM1/XRCC5/XRCC6/SET/DHX9/HIST1H3A/HIST1H3D/HIST1H3C/HIST1H3E/HIST1H3I/HIST1H3G/HIST1H3J/HIST1H3H/HIST1H3B/HIST1H3F/HIST2H2BF/H3F3A/H3F3B/HMGB1/UBA52/HIST1H4I/HIST1H4A/HIST1H4D/HIST1H4F/HIST1H4K/HIST1H4J/HIST1H4C/HIST1H4H/HIST1H4B/HIST1H4E/HIST1H4L/HIST2H4A/HIST4H4/HIST2H4B/DDX1/HIST2H3C/HIST2H3A/HIST2H3D/HIST1H1B/ANXA1/DDX3X/HIST1H1D/PURA/TOP1/H1F0/PARP1/G3BP1/HP1BP3/HMGA1	51
BP	GO:0035384	thioester biosynthetic process	19/1181	51/17653	2.58789e-10	1.01413e-08	8.45107e-09	DLD/ACSL5/DLAT/ACSL3/PDHA1/ACAT1/ACSL4/PDHB/HSD17B12/SLC25A1/PDPR/PPT1/GCDH/TECR/PDHX/ACSS1/MPC1/HSD17B8/ELOVL1	19
BP	GO:0071616	acyl-CoA biosynthetic process	19/1181	51/17653	2.58789e-10	1.01413e-08	8.45107e-09	DLD/ACSL5/DLAT/ACSL3/PDHA1/ACAT1/ACSL4/PDHB/HSD17B12/SLC25A1/PDPR/PPT1/GCDH/TECR/PDHX/ACSS1/MPC1/HSD17B8/ELOVL1	19
BP	GO:0034728	nucleosome organization	37/1181	176/17653	3.48033e-10	1.35328e-08	1.12773e-08	NPM1/SET/HIST1H3A/HIST1H3D/HIST1H3C/HIST1H3E/HIST1H3I/HIST1H3G/HIST1H3J/HIST1H3H/HIST1H3B/HIST1H3F/HIST2H2BF/H3F3A/H3F3B/HIST1H4I/HIST1H4A/HIST1H4D/HIST1H4F/HIST1H4K/HIST1H4J/HIST1H4C/HIST1H4H/HIST1H4B/HIST1H4E/HIST1H4L/HIST2H4A/HIST4H4/HIST2H4B/HIST2H3C/HIST2H3A/HIST2H3D/HIST1H1B/HIST1H1D/H1F0/HP1BP3/HMGA1	37
BP	GO:0009206	purine ribonucleoside triphosphate biosynthetic process	34/1181	153/17653	3.81921e-10	1.47363e-08	1.22802e-08	ATP5F1B/VCP/PKM/ATP5F1A/ENO1/OGDH/SLC25A13/GAPDH/PGK1/STOML2/HK1/ATP5PF/ATP5F1C/ATP5PO/CYC1/ATP5PD/ALDOA/COX5B/ATP5PB/LDHA/ATP5F1D/ATP5MF/NIPSNAP2/ADPGK/NUP155/ATP8/ATP5ME/ATP6V0A1/ATP6/PARP1/AAAS/TPI1/ATP5F1E/ATP5MG	34
BP	GO:0070126	mitochondrial translational termination	25/1181	89/17653	4.45372e-10	1.6999e-08	1.41659e-08	MRPL12/MRPS31/MRPL28/MRPL50/MRPL37/MRPS27/PTCD3/MRPL52/MRPS22/MRPL2/MRPL41/MRPL46/MRPS35/MRPS36/MRPL4/MRPS17/GFM2/DAP3/MRPS16/MRPS18B/MRPS23/MRPL19/MRPL10/MRPS26/MRPS15	25
BP	GO:0035722	interleukin-12-mediated signaling pathway	18/1181	47/17653	4.50732e-10	1.6999e-08	1.41659e-08	HSPA9/P4HB/ANXA2/HNRNPA2B1/SOD2/MSN/HNRNPF/CDC42/RAP1B/CFL1/PPIA/RPLP0/RALA/HNRNPDL/TCP1/LMNB1/MIF/PSME2	18
BP	GO:0071349	cellular response to interleukin-12	18/1181	47/17653	4.50732e-10	1.6999e-08	1.41659e-08	HSPA9/P4HB/ANXA2/HNRNPA2B1/SOD2/MSN/HNRNPF/CDC42/RAP1B/CFL1/PPIA/RPLP0/RALA/HNRNPDL/TCP1/LMNB1/MIF/PSME2	18
BP	GO:0009145	purine nucleoside triphosphate biosynthetic process	34/1181	154/17653	4.59193e-10	1.71889e-08	1.43241e-08	ATP5F1B/VCP/PKM/ATP5F1A/ENO1/OGDH/SLC25A13/GAPDH/PGK1/STOML2/HK1/ATP5PF/ATP5F1C/ATP5PO/CYC1/ATP5PD/ALDOA/COX5B/ATP5PB/LDHA/ATP5F1D/ATP5MF/NIPSNAP2/ADPGK/NUP155/ATP8/ATP5ME/ATP6V0A1/ATP6/PARP1/AAAS/TPI1/ATP5F1E/ATP5MG	34
BP	GO:1901605	alpha-amino acid metabolic process	42/1181	220/17653	5.44074e-10	2.02154e-08	1.68461e-08	P4HB/SHMT2/GOT2/GLUD1/ERO1A/ALDH18A1/OGDH/DLD/DLST/MCCC2/OAT/ALDH7A1/GLS/HIBADH/P4HA1/BCAT2/PRDX4/CPOX/MPST/ACAT1/COMT/HMGCL/ATP2B4/ALDH4A1/PLOD3/MCCC1/HPDL/IVD/PLOD2/PARK7/GCDH/GATM/MTHFD1/PLOD1/AGMAT/SLC25A32/DGLUCY/ACAD8/GCSH/ALDH6A1/KYNU/PRODH2	42
BP	GO:0009142	nucleoside triphosphate biosynthetic process	36/1181	171/17653	5.77239e-10	2.12899e-08	1.77416e-08	ATP5F1B/VCP/PKM/ATP5F1A/ENO1/OGDH/SLC25A13/GAPDH/AK4/PGK1/STOML2/HK1/ATP5PF/ATP5F1C/ATP5PO/CYC1/SUCLG1/ATP5PD/ALDOA/COX5B/ATP5PB/LDHA/ATP5F1D/ATP5MF/NIPSNAP2/ADPGK/NUP155/ATP8/ATP5ME/ATP6V0A1/ATP6/PARP1/AAAS/TPI1/ATP5F1E/ATP5MG	36
BP	GO:0045454	cell redox homeostasis	22/1181	71/17653	6.2431e-10	2.28458e-08	1.90382e-08	PDIA3/P4HB/PDIA4/PDIA6/ERO1A/DLD/ERP44/PRDX3/PRDX5/PRDX4/TXNDC5/TMX3/TMX1/PRDX1/GLRX5/TXNRD2/PTGES2/TXN/CYBA/TXNDC12/GPX1/SCO2	22
BP	GO:0033119	negative regulation of RNA splicing	13/1181	24/17653	6.28533e-10	2.28458e-08	1.90382e-08	HNRNPA2B1/HNRNPK/PTBP1/C1QBP/SRSF7/U2AF2/SRSF6/RPS26/SRSF4/RBMX/PTBP3/RPS13/SRSF9	13
BP	GO:0009127	purine nucleoside monophosphate biosynthetic process	35/1181	165/17653	8.06307e-10	2.88888e-08	2.4074e-08	ATP5F1B/VCP/PKM/ATP5F1A/ENO1/OGDH/SLC25A13/GAPDH/AK2/PGK1/STOML2/HK1/ATP5PF/ATP5F1C/ATP5PO/CYC1/ATP5PD/ALDOA/COX5B/ATP5PB/LDHA/ATP5F1D/ATP5MF/NIPSNAP2/ADPGK/NUP155/ATP8/ATP5ME/ATP6V0A1/ATP6/PARP1/AAAS/TPI1/ATP5F1E/ATP5MG	35
BP	GO:0009168	purine ribonucleoside monophosphate biosynthetic process	35/1181	165/17653	8.06307e-10	2.88888e-08	2.4074e-08	ATP5F1B/VCP/PKM/ATP5F1A/ENO1/OGDH/SLC25A13/GAPDH/AK2/PGK1/STOML2/HK1/ATP5PF/ATP5F1C/ATP5PO/CYC1/ATP5PD/ALDOA/COX5B/ATP5PB/LDHA/ATP5F1D/ATP5MF/NIPSNAP2/ADPGK/NUP155/ATP8/ATP5ME/ATP6V0A1/ATP6/PARP1/AAAS/TPI1/ATP5F1E/ATP5MG	35
BP	GO:0009201	ribonucleoside triphosphate biosynthetic process	34/1181	159/17653	1.12318e-09	3.99566e-08	3.32971e-08	ATP5F1B/VCP/PKM/ATP5F1A/ENO1/OGDH/SLC25A13/GAPDH/PGK1/STOML2/HK1/ATP5PF/ATP5F1C/ATP5PO/CYC1/ATP5PD/ALDOA/COX5B/ATP5PB/LDHA/ATP5F1D/ATP5MF/NIPSNAP2/ADPGK/NUP155/ATP8/ATP5ME/ATP6V0A1/ATP6/PARP1/AAAS/TPI1/ATP5F1E/ATP5MG	34
BP	GO:0042255	ribosome assembly	20/1181	61/17653	1.22325e-09	4.32102e-08	3.60085e-08	NPM1/C1QBP/RPL3/RPSA/RPL6/RPL12/RPS10/RPL10/RPL5/RPL11/DDX3X/RPS28/RPS14/RPS19/RPL23A/RPS5/RPL38/RPL24/RPS15/MDN1	20
BP	GO:0031581	hemidesmosome assembly	9/1181	11/17653	1.26863e-09	4.44995e-08	3.70829e-08	PLEC/ITGA6/ITGB4/KRT14/KRT5/LAMA3/LAMB3/CD151/COL17A1	9
BP	GO:0006415	translational termination	26/1181	102/17653	2.01215e-09	7.00899e-08	5.84083e-08	EIF5A/MRPL12/MRPS31/MRPL28/MRPL50/MRPL37/MRPS27/PTCD3/MRPL52/MRPS22/MRPL2/MRPL41/MRPL46/MRPS35/MRPS36/MRPL4/MRPS17/GFM2/DAP3/MRPS16/MRPS18B/MRPS23/MRPL19/MRPL10/MRPS26/MRPS15	26
BP	GO:0000380	alternative mRNA splicing, via spliceosome	19/1181	57/17653	2.31225e-09	7.9988e-08	6.66567e-08	HNRNPA1/HNRNPL/HNRNPU/PTBP1/HNRNPM/DHX9/SFPQ/DDX5/SRSF1/DDX17/SRSF6/RBMX/THRAP3/SRSF2/RBM25/RBM4/EFCAB5/MBNL1/RBM17	19
BP	GO:2001243	negative regulation of intrinsic apoptotic signaling pathway	25/1181	96/17653	2.53529e-09	8.71028e-08	7.25857e-08	HYOU1/ENO1/SOD2/PTPN1/VDAC2/TRAP1/HSPA1A/CD44/NONO/OPA1/NDUFS3/PPIF/PARK7/DDX3X/MUC1/WFS1/SRC/HSPB1/HTRA2/BCL2L2/MIF/TXNDC12/GPX1/BID/SYVN1	25
BP	GO:0048193	Golgi vesicle transport	56/1181	360/17653	2.65266e-09	9.05152e-08	7.54293e-08	KRT18/VCP/LMAN1/VAPA/HYOU1/LMAN2/BCAP31/RAB1A/RAB1B/TMED9/ACSL3/SNAP23/VAPB/RAB10/RACK1/TMED10/SCFD1/RAB14/TMED2/SEC22B/TMED4/VAMP3/TICAM2/CD55/SCAMP2/NSF/AP2A1/CD59/MCFD2/LAMP1/ERGIC2/STX4/ERGIC1/SURF4/RAB8A/MACF1/GCC2/COPG1/VAMP8/SPTAN1/GOSR2/SPTBN1/RAB6A/AP1G1/STX18/YIPF5/CTSZ/ARFGAP1/RER1/YIF1A/TGOLN2/GOLGA2/TMED1/TAPBP/CNIH4/DYNLL1	56
BP	GO:0007596	blood coagulation	54/1181	341/17653	2.67731e-09	9.07391e-08	7.56159e-08	FLNA/KRT1/ACTB/ANXA2/ITGA2/LMAN1/GNB1/RHOA/C1QBP/PABPC4/F3/HIST1H3A/HIST1H3D/HIST1H3C/HIST1H3E/HIST1H3I/HIST1H3G/HIST1H3J/HIST1H3H/HIST1H3B/HIST1H3F/CDC42/TSPAN8/GNAS/ITPR3/RAC1/H3F3A/H3F3B/RAC2/CD59/YWHAZ/HIST2H3C/HIST2H3A/HIST2H3D/AK3/CEACAM1/AKAP1/RHOG/LNPK/CYP4F11/CAV1/SRC/HSPB1/PROCR/EHD1/VPS45/VCL/ANO6/RAP2B/PLAU/SERPINE1/VKORC1/APOH/LCP2	54
BP	GO:0009124	nucleoside monophosphate biosynthetic process	37/1181	189/17653	2.81299e-09	9.46978e-08	7.89148e-08	ATP5F1B/VCP/PKM/ATP5F1A/ENO1/OGDH/SLC25A13/GAPDH/AK2/PGK1/STOML2/HK1/ATP5PF/ATP5F1C/ATP5PO/CYC1/ATP5PD/ALDOA/COX5B/ATP5PB/LDHA/ATP5F1D/DUT/ATP5MF/NIPSNAP2/ADPGK/NUP155/ATP8/ATP5ME/ATP6V0A1/ATP6/PARP1/AAAS/TPI1/ATP5F1E/ATP5MG/HDDC2	37
BP	GO:0006120	mitochondrial electron transport, NADH to ubiquinone	18/1181	52/17653	3.05391e-09	1.02123e-07	8.51023e-08	DLD/NDUFS3/NDUFA8/COQ9/NDUFS1/PARK7/NDUFV2/NDUFV1/NDUFA10/NDUFS2/NDUFAB1/NDUFB11/NDUFB10/NDUFS6/NDUFS8/NDUFS5/NDUFA4/NDUFA7	18
BP	GO:0006333	chromatin assembly or disassembly	37/1181	190/17653	3.27264e-09	1.08712e-07	9.05935e-08	NPM1/SET/HIST1H3A/HIST1H3D/HIST1H3C/HIST1H3E/HIST1H3I/HIST1H3G/HIST1H3J/HIST1H3H/HIST1H3B/HIST1H3F/HIST2H2BF/H3F3A/H3F3B/HIST1H4I/HIST1H4A/HIST1H4D/HIST1H4F/HIST1H4K/HIST1H4J/HIST1H4C/HIST1H4H/HIST1H4B/HIST1H4E/HIST1H4L/HIST2H4A/HIST4H4/HIST2H4B/HIST2H3C/HIST2H3A/HIST2H3D/HIST1H1B/HIST1H1D/H1F0/HP1BP3/HMGA1	37
BP	GO:0006122	mitochondrial electron transport, ubiquinol to cytochrome c	10/1181	15/17653	3.81398e-09	1.25861e-07	1.04884e-07	UQCRC2/UQCRC1/UQCRFS1/CYCS/CYC1/UQCRH/UQCRB/PMPCB/UQCR10/UQCRQ	10
BP	GO:0000723	telomere maintenance	33/1181	159/17653	4.37007e-09	1.4327e-07	1.19391e-07	HNRNPA2B1/HNRNPA1/HNRNPU/XRCC5/XRCC6/HNRNPC/HNRNPD/CTNNB1/HSP90AA1/HSP90AB1/PRKDC/HIST1H4I/HIST1H4A/HIST1H4D/HIST1H4F/HIST1H4K/HIST1H4J/HIST1H4C/HIST1H4H/HIST1H4B/HIST1H4E/HIST1H4L/HIST2H4A/HIST4H4/HIST2H4B/RPA2/SRC/TCP1/CCT3/PML/PARP1/DKC1/GAR1	33
BP	GO:0007599	hemostasis	54/1181	346/17653	4.53504e-09	1.47713e-07	1.23094e-07	FLNA/KRT1/ACTB/ANXA2/ITGA2/LMAN1/GNB1/RHOA/C1QBP/PABPC4/F3/HIST1H3A/HIST1H3D/HIST1H3C/HIST1H3E/HIST1H3I/HIST1H3G/HIST1H3J/HIST1H3H/HIST1H3B/HIST1H3F/CDC42/TSPAN8/GNAS/ITPR3/RAC1/H3F3A/H3F3B/RAC2/CD59/YWHAZ/HIST2H3C/HIST2H3A/HIST2H3D/AK3/CEACAM1/AKAP1/RHOG/LNPK/CYP4F11/CAV1/SRC/HSPB1/PROCR/EHD1/VPS45/VCL/ANO6/RAP2B/PLAU/SERPINE1/VKORC1/APOH/LCP2	54
BP	GO:0097193	intrinsic apoptotic signaling pathway	48/1181	290/17653	4.7734e-09	1.54473e-07	1.28728e-07	P4HB/AIFM1/HNRNPK/HYOU1/ENO1/ERO1A/SOD2/PTPN1/VDAC2/TRAP1/HSPA1A/EPHA2/BCAP31/CD44/NONO/SFPQ/OPA1/DDX5/RACK1/CYCS/NDUFS3/ERP29/PPIF/RPS7/RPS3/PRKDC/PARK7/DDX3X/MYBBP1A/MUC1/RPL26/FIS1/CAV1/WFS1/SRC/HSPB1/HTRA2/BCL2L2/MIF/TXNDC12/PML/TMEM109/PARP1/GPX1/BID/ARL6IP5/SYVN1/BCLAF1	48
BP	GO:0050817	coagulation	54/1181	347/17653	5.03103e-09	1.61767e-07	1.34806e-07	FLNA/KRT1/ACTB/ANXA2/ITGA2/LMAN1/GNB1/RHOA/C1QBP/PABPC4/F3/HIST1H3A/HIST1H3D/HIST1H3C/HIST1H3E/HIST1H3I/HIST1H3G/HIST1H3J/HIST1H3H/HIST1H3B/HIST1H3F/CDC42/TSPAN8/GNAS/ITPR3/RAC1/H3F3A/H3F3B/RAC2/CD59/YWHAZ/HIST2H3C/HIST2H3A/HIST2H3D/AK3/CEACAM1/AKAP1/RHOG/LNPK/CYP4F11/CAV1/SRC/HSPB1/PROCR/EHD1/VPS45/VCL/ANO6/RAP2B/PLAU/SERPINE1/VKORC1/APOH/LCP2	54
BP	GO:0051701	interaction with host	39/1181	211/17653	5.82557e-09	1.86121e-07	1.55101e-07	P4HB/ITGB1/ITGA2/VAPA/CTNND1/SLC25A6/GAPDH/HSPA1A/HSPA1B/TFRC/EGFR/EPHA2/DDX39B/RPSA/SCARB2/VAPB/CTNNB1/PC/RAB7A/CD55/PPIA/SLC1A5/TRIM28/F11R/UBA52/ALB/LAMP1/LGALS1/SCRIB/ITGAV/KPNB1/CAV1/SRC/VAMP8/LDLR/TCP1/PML/CTSB/PVR	39
BP	GO:0002244	hematopoietic progenitor cell differentiation	36/1181	186/17653	6.31364e-09	2.00438e-07	1.67032e-07	HSPA9/EEF2/XRCC5/HIST1H3A/HIST1H3D/HIST1H3C/HIST1H3E/HIST1H3I/HIST1H3G/HIST1H3J/HIST1H3H/HIST1H3B/HIST1H3F/H3F3A/H3F3B/UBA52/PRKDC/HIST1H4I/HIST1H4A/HIST1H4D/HIST1H4F/HIST1H4K/HIST1H4J/HIST1H4C/HIST1H4H/HIST1H4B/HIST1H4E/HIST1H4L/HIST2H4A/HIST4H4/HIST2H4B/HIST2H3C/HIST2H3A/HIST2H3D/PRRC2C/PSME2	36
BP	GO:0009156	ribonucleoside monophosphate biosynthetic process	35/1181	178/17653	6.66271e-09	2.1019e-07	1.75158e-07	ATP5F1B/VCP/PKM/ATP5F1A/ENO1/OGDH/SLC25A13/GAPDH/AK2/PGK1/STOML2/HK1/ATP5PF/ATP5F1C/ATP5PO/CYC1/ATP5PD/ALDOA/COX5B/ATP5PB/LDHA/ATP5F1D/ATP5MF/NIPSNAP2/ADPGK/NUP155/ATP8/ATP5ME/ATP6V0A1/ATP6/PARP1/AAAS/TPI1/ATP5F1E/ATP5MG	35
BP	GO:0030099	myeloid cell differentiation	58/1181	394/17653	1.10451e-08	3.46265e-07	2.88554e-07	HSPA9/ANXA2/HSPA1A/HSPA1B/TFRC/PRDX3/EPHA2/SFXN1/PABPC4/HIST1H3A/HIST1H3D/HIST1H3C/HIST1H3E/HIST1H3I/HIST1H3G/HIST1H3J/HIST1H3H/HIST1H3B/HIST1H3F/ATP5IF1/CDC42/CTNNB1/GNAS/H3F3A/H3F3B/B2M/HIST1H4I/HIST1H4A/HIST1H4D/HIST1H4F/HIST1H4K/HIST1H4J/HIST1H4C/HIST1H4H/HIST1H4B/HIST1H4E/HIST1H4L/HIST2H4A/HIST4H4/HIST2H4B/RPS6/HIST2H3C/HIST2H3A/HIST2H3D/LGALS3/CEACAM1/DPY30/RPS14/RPS19/PTBP3/LYAR/SRC/HAX1/P…	58
BP	GO:1903312	negative regulation of mRNA metabolic process	21/1181	75/17653	1.16845e-08	3.6377e-07	3.03141e-07	HNRNPA2B1/HNRNPK/HNRNPU/PTBP1/PABPC1/YBX1/SYNCRIP/HNRNPC/C1QBP/DHX9/HNRNPD/HNRNPA0/ELAVL1/TARDBP/SRSF7/U2AF2/SRSF6/SRSF4/RBMX/THRAP3/SRSF9	21
BP	GO:0051188	cofactor biosynthetic process	48/1181	298/17653	1.17485e-08	3.6377e-07	3.03141e-07	PKM/ENO1/OGDH/DLD/ACSL5/GAPDH/MAOB/DLAT/PGK1/HK1/ATP5IF1/ACSL3/CPOX/PDHA1/ACAT1/ACSL4/IDH2/PDHB/ALDOA/HSD17B12/LDHA/COQ9/SLC25A1/COASY/PDPR/PPT1/GCDH/TECR/FDXR/PDHX/MTHFD1/ACSS1/PNPO/PPOX/ADPGK/SUCLA2/MPC1/NUP155/HSD17B8/COQ6/CYBA/IBA57/AAAS/ELOVL1/TPI1/TSPO/MTHFD1L/KYNU	48
BP	GO:0006323	DNA packaging	38/1181	208/17653	1.2685e-08	3.90354e-07	3.25295e-07	AIFM1/NPM1/SET/HIST1H3A/HIST1H3D/HIST1H3C/HIST1H3E/HIST1H3I/HIST1H3G/HIST1H3J/HIST1H3H/HIST1H3B/HIST1H3F/HIST2H2BF/H3F3A/H3F3B/HIST1H4I/HIST1H4A/HIST1H4D/HIST1H4F/HIST1H4K/HIST1H4J/HIST1H4C/HIST1H4H/HIST1H4B/HIST1H4E/HIST1H4L/HIST2H4A/HIST4H4/HIST2H4B/HIST2H3C/HIST2H3A/HIST2H3D/HIST1H1B/HIST1H1D/H1F0/HP1BP3/HMGA1	38
BP	GO:0038111	interleukin-7-mediated signaling pathway	13/1181	30/17653	2.06402e-08	6.31288e-07	5.26073e-07	HIST1H3A/HIST1H3D/HIST1H3C/HIST1H3E/HIST1H3I/HIST1H3G/HIST1H3J/HIST1H3H/HIST1H3B/HIST1H3F/HIST2H3C/HIST2H3A/HIST2H3D	13
BP	GO:2001234	negative regulation of apoptotic signaling pathway	38/1181	213/17653	2.47084e-08	7.51137e-07	6.25947e-07	ITGA6/CTNNA1/ACAA2/HYOU1/ENO1/SLC25A5/SOD2/PTPN1/VDAC2/TRAP1/HSPA1A/HSPA1B/CD44/NONO/OPA1/CTNNB1/NDUFS3/LMNA/PPIF/LGALS3/PARK7/DDX3X/ITGAV/MUC1/WFS1/SRC/HSPB1/QARS/CTTN/HTRA2/BCL2L2/MIF/TXNDC12/SERPINE1/GPX1/TMBIM1/BID/SYVN1	38
BP	GO:0071806	protein transmembrane transport	18/1181	59/17653	2.958e-08	8.93814e-07	7.44845e-07	HSPD1/HSPA8/HYOU1/TOMM70/TOMM40/GRPEL1/TIMM50/TIMM13/PEX14/TOMM20/AGK/TIMM44/TOMM22/SEC63/CHCHD4/SRP72/TIMM23/TOMM7	18
BP	GO:0006336	DNA replication-independent nucleosome assembly	17/1181	53/17653	3.10131e-08	9.31507e-07	7.76256e-07	NPM1/H3F3A/H3F3B/HIST1H4I/HIST1H4A/HIST1H4D/HIST1H4F/HIST1H4K/HIST1H4J/HIST1H4C/HIST1H4H/HIST1H4B/HIST1H4E/HIST1H4L/HIST2H4A/HIST4H4/HIST2H4B	17
BP	GO:0009108	coenzyme biosynthetic process	41/1181	242/17653	3.21191e-08	9.58985e-07	7.99154e-07	PKM/ENO1/OGDH/DLD/ACSL5/GAPDH/DLAT/PGK1/HK1/ATP5IF1/ACSL3/PDHA1/ACAT1/ACSL4/IDH2/PDHB/ALDOA/HSD17B12/LDHA/COQ9/SLC25A1/COASY/PDPR/PPT1/GCDH/TECR/FDXR/PDHX/MTHFD1/ACSS1/PNPO/ADPGK/MPC1/NUP155/HSD17B8/COQ6/AAAS/ELOVL1/TPI1/MTHFD1L/KYNU	41
BP	GO:0098760	response to interleukin-7	13/1181	31/17653	3.33728e-08	9.84693e-07	8.20577e-07	HIST1H3A/HIST1H3D/HIST1H3C/HIST1H3E/HIST1H3I/HIST1H3G/HIST1H3J/HIST1H3H/HIST1H3B/HIST1H3F/HIST2H3C/HIST2H3A/HIST2H3D	13
BP	GO:0098761	cellular response to interleukin-7	13/1181	31/17653	3.33728e-08	9.84693e-07	8.20577e-07	HIST1H3A/HIST1H3D/HIST1H3C/HIST1H3E/HIST1H3I/HIST1H3G/HIST1H3J/HIST1H3H/HIST1H3B/HIST1H3F/HIST2H3C/HIST2H3A/HIST2H3D	13
BP	GO:0061077	chaperone-mediated protein folding	21/1181	80/17653	4.06513e-08	1.18177e-06	9.84805e-07	HSPD1/HSPA5/HSPA9/CANX/CALR/HSPA8/PDIA4/HYOU1/ERO1A/TRAP1/HSPA1A/HSPA1B/PPIB/HSPE1/CSNK2A1/FKBP2/FKBP8/HSPB1/TOR1A/TCP1/CCT3	21
BP	GO:0044242	cellular lipid catabolic process	37/1181	208/17653	4.07396e-08	1.18177e-06	9.84805e-07	HADHA/ETFA/ACADVL/ACAA2/PCK2/HADHB/ETFB/ECHS1/CPT2/ECI1/SCP2/ALDH3A2/HADH/MGLL/ECH1/ACAT1/ACAD9/GBA/CYP4F3/HSD17B4/IVD/ETFDH/CPT1A/DECR1/PPT1/GCDH/ACAA1/NDUFAB1/ACADM/LDLR/ACOX1/SGPL1/MECR/ACADS/SMPDL3B/ACOT8/NUDT19	37
BP	GO:0045637	regulation of myeloid cell differentiation	41/1181	244/17653	4.07587e-08	1.18177e-06	9.84805e-07	HSPA9/HSPA1A/HSPA1B/HIST1H3A/HIST1H3D/HIST1H3C/HIST1H3E/HIST1H3I/HIST1H3G/HIST1H3J/HIST1H3H/HIST1H3B/HIST1H3F/CTNNB1/GNAS/H3F3A/H3F3B/B2M/HIST1H4I/HIST1H4A/HIST1H4D/HIST1H4F/HIST1H4K/HIST1H4J/HIST1H4C/HIST1H4H/HIST1H4B/HIST1H4E/HIST1H4L/HIST2H4A/HIST4H4/HIST2H4B/HIST2H3C/HIST2H3A/HIST2H3D/LGALS3/CEACAM1/DPY30/HAX1/PURB/CLDN18	41
BP	GO:0034724	DNA replication-independent nucleosome organization	17/1181	54/17653	4.24591e-08	1.22399e-06	1.01999e-06	NPM1/H3F3A/H3F3B/HIST1H4I/HIST1H4A/HIST1H4D/HIST1H4F/HIST1H4K/HIST1H4J/HIST1H4C/HIST1H4H/HIST1H4B/HIST1H4E/HIST1H4L/HIST2H4A/HIST4H4/HIST2H4B	17
BP	GO:0034080	CENP-A containing nucleosome assembly	15/1181	43/17653	5.62604e-08	1.60342e-06	1.33619e-06	NPM1/HIST1H4I/HIST1H4A/HIST1H4D/HIST1H4F/HIST1H4K/HIST1H4J/HIST1H4C/HIST1H4H/HIST1H4B/HIST1H4E/HIST1H4L/HIST2H4A/HIST4H4/HIST2H4B	15
BP	GO:0061641	CENP-A containing chromatin organization	15/1181	43/17653	5.62604e-08	1.60342e-06	1.33619e-06	NPM1/HIST1H4I/HIST1H4A/HIST1H4D/HIST1H4F/HIST1H4K/HIST1H4J/HIST1H4C/HIST1H4H/HIST1H4B/HIST1H4E/HIST1H4L/HIST2H4A/HIST4H4/HIST2H4B	15
BP	GO:0007029	endoplasmic reticulum organization	16/1181	49/17653	5.93469e-08	1.68183e-06	1.40153e-06	LMAN1/ATL3/RTN4/LMAN2/TOR1AIP2/VAPB/RAB10/RTN3/VMP1/RAB18/SEC61A1/LNPK/TMEM33/ZFYVE27/ARL6IP1/STX18	16
BP	GO:1901606	alpha-amino acid catabolic process	24/1181	104/17653	6.6946e-08	1.88652e-06	1.5721e-06	GOT2/GLUD1/OGDH/DLD/DLST/MCCC2/OAT/ALDH7A1/GLS/HIBADH/BCAT2/ACAT1/HMGCL/ATP2B4/ALDH4A1/MCCC1/HPDL/IVD/GCDH/ACAD8/GCSH/ALDH6A1/KYNU/PRODH2	24
BP	GO:0006626	protein targeting to mitochondrion	30/1181	152/17653	7.22556e-08	2.02477e-06	1.68731e-06	HSPD1/UQCRC2/SLC25A6/PITRM1/TOMM70/TOMM40/GRPEL1/ATP5IF1/TIMM50/HSP90AA1/TIMM13/TOMM20/RAC2/AGK/TIMM44/TOMM22/CHCHD4/PMPCA/FIS1/MTX1/HAX1/HTRA2/MFF/PMPCB/TSPO/TIMM23/CYB5R1/TOMM7/BID/TOMM34	30
BP	GO:0070585	protein localization to mitochondrion	35/1181	195/17653	7.47857e-08	2.08403e-06	1.73669e-06	HSPD1/UQCRC2/SLC25A6/PITRM1/TOMM70/TOMM40/GRPEL1/HK1/ATP5IF1/MTCH2/TIMM50/HSP90AA1/TIMM13/TOMM20/RAC2/AGK/YWHAZ/TIMM44/TOMM22/CHCHD4/PMPCA/YWHAB/FIS1/MTX1/HAX1/HTRA2/MFF/PMPCB/TSPO/TIMM23/CYB5R1/TOMM7/BID/DYNLL1/TOMM34	35
BP	GO:1904837	beta-catenin-TCF complex assembly	15/1181	44/17653	8.01049e-08	2.21992e-06	1.84994e-06	CTNNB1/HIST1H4I/HIST1H4A/HIST1H4D/HIST1H4F/HIST1H4K/HIST1H4J/HIST1H4C/HIST1H4H/HIST1H4B/HIST1H4E/HIST1H4L/HIST2H4A/HIST4H4/HIST2H4B	15
BP	GO:0033108	mitochondrial respiratory chain complex assembly	23/1181	98/17653	8.98525e-08	2.47637e-06	2.06364e-06	NDUFS3/ACAD9/NDUFA8/NDUFAF2/NDUFS1/NDUFV2/NDUFV1/NDUFA10/NDUFS2/NDUFAB1/UQCRB/NDUFB11/NDUFB10/COX20/ECSIT/NDUFS6/NDUFS8/COX17/SCO2/UQCR10/NDUFS5/NDUFA7/LYRM7	23
BP	GO:0048025	negative regulation of mRNA splicing, via spliceosome	10/1181	19/17653	9.15458e-08	2.50926e-06	2.09105e-06	HNRNPA2B1/HNRNPK/PTBP1/C1QBP/SRSF7/U2AF2/SRSF6/SRSF4/RBMX/SRSF9	10
BP	GO:0065004	protein-DNA complex assembly	41/1181	252/17653	1.02332e-07	2.78967e-06	2.32472e-06	NPM1/SET/HIST1H3A/HIST1H3D/HIST1H3C/HIST1H3E/HIST1H3I/HIST1H3G/HIST1H3J/HIST1H3H/HIST1H3B/HIST1H3F/HIST2H2BF/H3F3A/H3F3B/HMGB1/UBA52/HIST1H4I/HIST1H4A/HIST1H4D/HIST1H4F/HIST1H4K/HIST1H4J/HIST1H4C/HIST1H4H/HIST1H4B/HIST1H4E/HIST1H4L/HIST2H4A/HIST4H4/HIST2H4B/HIST2H3C/HIST2H3A/HIST2H3D/HIST1H1B/HIST1H1D/H1F0/RPA2/PARP1/CAND1/HP1BP3	41
BP	GO:0072659	protein localization to plasma membrane	39/1181	234/17653	1.08624e-07	2.94518e-06	2.45432e-06	FLNA/KRT18/CLTC/ANXA2/ITGB1/JUP/AGR2/EZR/EGFR/EPHA2/BSG/ACSL3/RAB10/RACK1/ATP1B1/CSNK2A1/TMED2/STX7/VAMP3/NSF/ITGA3/F11R/DLG1/STX4/MYADM/SCRIB/RHOG/PICALM/RAB8A/MACF1/VAMP8/SPTBN1/ZFYVE27/RER1/SLMAP/TSPAN15/TMBIM1/S100A10/DENND4C	39
BP	GO:0031055	chromatin remodeling at centromere	15/1181	45/17653	1.12761e-07	3.04091e-06	2.53409e-06	NPM1/HIST1H4I/HIST1H4A/HIST1H4D/HIST1H4F/HIST1H4K/HIST1H4J/HIST1H4C/HIST1H4H/HIST1H4B/HIST1H4E/HIST1H4L/HIST2H4A/HIST4H4/HIST2H4B	15
BP	GO:0031647	regulation of protein stability	41/1181	253/17653	1.14409e-07	3.06884e-06	2.55737e-06	HSPD1/FLNA/CALR/HSPA8/ASPH/RTN4/GAPDH/HSPA1A/HSPA1B/PHB/ISOC2/CDC42/PHB2/PPIB/ATP1B1/HSP90AA1/NOMO2/KRAS/SEL1L/RPS7/HSP90AB1/PRKDC/LAMP1/STX12/NCLN/LAMP2/RPL5/HIST1H1B/PARK7/RPL11/RPL23/WFS1/SRC/TCP1/DPM3/CCT3/HIP1R/ZNF207/DERL1/TOMM7/SYVN1	41
BP	GO:0042273	ribosomal large subunit biogenesis	19/1181	71/17653	1.28019e-07	3.41564e-06	2.84637e-06	NPM1/RPL3/RPL6/RPL7A/RPL12/RPL7/RPL14/RPL10/RPL5/RPL11/RPL26/RPL35/RPL10A/RPL23A/RPL35A/RPL38/RPL24/MDN1/RSL1D1	19
BP	GO:0065002	intracellular protein transmembrane transport	16/1181	52/17653	1.51729e-07	4.02684e-06	3.3557e-06	HSPD1/HYOU1/TOMM40/GRPEL1/TIMM50/TIMM13/PEX14/TOMM20/AGK/TIMM44/TOMM22/SEC63/CHCHD4/SRP72/TIMM23/TOMM7	16
BP	GO:0072655	establishment of protein localization to mitochondrion	34/1181	192/17653	1.60157e-07	4.22813e-06	3.52344e-06	HSPD1/UQCRC2/SLC25A6/PITRM1/TOMM70/TOMM40/GRPEL1/HK1/ATP5IF1/TIMM50/HSP90AA1/TIMM13/TOMM20/RAC2/AGK/YWHAZ/TIMM44/TOMM22/CHCHD4/PMPCA/YWHAB/FIS1/MTX1/HAX1/HTRA2/MFF/PMPCB/TSPO/TIMM23/CYB5R1/TOMM7/BID/DYNLL1/TOMM34	34
BP	GO:1990778	protein localization to cell periphery	42/1181	266/17653	1.68776e-07	4.43236e-06	3.69364e-06	FLNA/KRT18/CLTC/ANXA2/ITGB1/JUP/AGR2/EZR/EGFR/EPHA2/BSG/ACSL3/RAB10/RACK1/ATP1B1/CSNK2A1/TMED2/STX7/VAMP3/NSF/ITGA3/F11R/DLG1/NUMA1/STX4/MYADM/SCRIB/RHOG/PICALM/RAB8A/CAV1/MACF1/VAMP8/SPTBN1/ZFYVE27/RER1/LIN7A/SLMAP/TSPAN15/TMBIM1/S100A10/DENND4C	42
BP	GO:0033539	fatty acid beta-oxidation using acyl-CoA dehydrogenase	9/1181	16/17653	1.94031e-07	5.0428e-06	4.20233e-06	ETFA/ACADVL/ETFB/IVD/ETFDH/GCDH/ACADM/ACOX1/ACADS	9
BP	GO:0071786	endoplasmic reticulum tubular network organization	9/1181	16/17653	1.94031e-07	5.0428e-06	4.20233e-06	ATL3/RTN4/RAB10/RTN3/RAB18/LNPK/TMEM33/ZFYVE27/ARL6IP1	9
BP	GO:0006790	sulfur compound metabolic process	52/1181	367/17653	2.20126e-07	5.69151e-06	4.74293e-06	HSPA9/SQOR/OGDH/DLD/ACSL5/DLST/MCCC2/DLAT/ACOT9/ETHE1/PCYOX1/ACSF2/ACSL3/PDHA1/MPST/ACAT1/PC/COMT/ACSL4/SUCLG1/HMGCL/SUCLG2/PDHB/HSD17B12/HSD17B4/MCCC1/GSTK1/ST3GAL1/SLC25A1/EEF1G/PARK7/IMPAD1/PDPR/PPT1/GCDH/TECR/PDHX/MTHFD1/PTGES/ACSS1/SUCLA2/MPC1/HSD17B8/IBA57/ELOVL1/ACOT8/DBT/GPX1/GNS/SLC25A10/B4GALT1/KYNU	52
BP	GO:0051169	nuclear transport	50/1181	351/17653	3.18322e-07	8.18821e-06	6.82351e-06	PDIA3/HSPA9/CALR/HNRNPA2B1/JUP/HNRNPA1/NPM1/EIF5A/SET/DHX9/DDX39B/DDX39A/RPSA/PHB2/SRSF1/KHDRBS1/MAVS/SRSF7/HTATIP2/U2AF2/HSP90AB1/SRSF3/SNRPD3/ANP32A/SRSF6/SNRPD1/SSB/SNRPD2/RAB18/PARK7/TMEM173/EMD/MYBBP1A/RPL23/SRSF4/IPO5/KPNB1/SRSF2/U2AF1/TMEM33/SRRM1/NUP155/TXN/SNRPB/PML/AAAS/RBM4/RPS15/SRSF9/HMGA1	50
BP	GO:0060249	anatomical structure homeostasis	54/1181	393/17653	3.52967e-07	9.03308e-06	7.52757e-06	KRT1/ACTB/HNRNPA2B1/HNRNPA1/FH/HNRNPU/POTEE/TFRC/XRCC5/EGFR/XRCC6/HNRNPC/HNRNPD/TPP1/CTNNB1/GNAS/RAB7A/HSP90AA1/KRAS/RAC1/HSP90AB1/ALDOA/RAC2/LPCAT1/PRDX1/B2M/ALB/PRKDC/HIST1H4I/HIST1H4A/HIST1H4D/HIST1H4F/HIST1H4K/HIST1H4J/HIST1H4C/HIST1H4H/HIST1H4B/HIST1H4E/HIST1H4L/HIST2H4A/HIST4H4/HIST2H4B/LAMP2/RPA2/SRC/HSPB1/TCP1/CCT3/CLDN18/PML/PARP1/DKC1/GAR1/ADAM8	54
BP	GO:0016233	telomere capping	16/1181	55/17653	3.59824e-07	9.13715e-06	7.61429e-06	HNRNPD/PRKDC/HIST1H4I/HIST1H4A/HIST1H4D/HIST1H4F/HIST1H4K/HIST1H4J/HIST1H4C/HIST1H4H/HIST1H4B/HIST1H4E/HIST1H4L/HIST2H4A/HIST4H4/HIST2H4B	16
BP	GO:0071824	protein-DNA complex subunit organization	43/1181	283/17653	3.60677e-07	9.13715e-06	7.61429e-06	NPM1/SET/HIST1H3A/HIST1H3D/HIST1H3C/HIST1H3E/HIST1H3I/HIST1H3G/HIST1H3J/HIST1H3H/HIST1H3B/HIST1H3F/HIST2H2BF/H3F3A/H3F3B/HMGB1/UBA52/HIST1H4I/HIST1H4A/HIST1H4D/HIST1H4F/HIST1H4K/HIST1H4J/HIST1H4C/HIST1H4H/HIST1H4B/HIST1H4E/HIST1H4L/HIST2H4A/HIST4H4/HIST2H4B/HIST2H3C/HIST2H3A/HIST2H3D/HIST1H1B/RPL23/HIST1H1D/H1F0/RPA2/PARP1/CAND1/HP1BP3/HMGA1	43
BP	GO:0060627	regulation of vesicle-mediated transport	63/1181	490/17653	4.2425e-07	1.06937e-05	8.91138e-06	ACTN4/ANXA2/CALR/ATP2A2/ITGA2/HNRNPK/PTPN1/MSN/LMAN2/EZR/AP2B1/ACSL3/RAB10/RACK1/RAB5C/SCFD1/RAB14/RAB7A/RALB/RAB21/RAC1/NSF/RAC2/AP2A1/HMGB1/B2M/LAMP1/RAB11B/RALA/STX4/LGALS3/ANXA1/CEACAM1/ITGAV/PPT1/PICALM/RAB8A/CAV1/SYNJ2BP/SDCBP/LYAR/SRC/VAMP8/LDLR/CD63/AHSG/ARHGAP1/AP1G1/TOR1A/LRPAP1/EHD1/CD47/CD151/CYBA/STX18/ANO6/YIPF5/ARFGAP1/HIP1R/SERPINE1/TBC1D10C/STXBP2/RAB25	63
BP	GO:0030100	regulation of endocytosis	37/1181	229/17653	5.07045e-07	1.27167e-05	1.05972e-05	ACTN4/ANXA2/CALR/ITGA2/HNRNPK/PTPN1/LMAN2/AP2B1/RACK1/RAB5C/RAB14/RAB21/RAC1/AP2A1/HMGB1/B2M/LGALS3/ITGAV/PPT1/PICALM/CAV1/SYNJ2BP/SDCBP/LYAR/SRC/LDLR/CD63/AHSG/TOR1A/LRPAP1/CD47/CD151/CYBA/ANO6/ARFGAP1/HIP1R/SERPINE1	37
BP	GO:0006913	nucleocytoplasmic transport	49/1181	347/17653	5.4303e-07	1.35514e-05	1.12929e-05	PDIA3/HSPA9/CALR/HNRNPA2B1/JUP/HNRNPA1/NPM1/EIF5A/SET/DHX9/DDX39B/DDX39A/RPSA/PHB2/SRSF1/KHDRBS1/MAVS/SRSF7/HTATIP2/U2AF2/HSP90AB1/SRSF3/SNRPD3/ANP32A/SRSF6/SNRPD1/SSB/SNRPD2/RAB18/PARK7/TMEM173/EMD/MYBBP1A/RPL23/SRSF4/IPO5/KPNB1/SRSF2/U2AF1/TMEM33/SRRM1/NUP155/TXN/SNRPB/PML/AAAS/RBM4/RPS15/SRSF9	49
BP	GO:0042026	protein refolding	11/1181	27/17653	5.51595e-07	1.3697e-05	1.14142e-05	HSPD1/HSPA5/HSPA9/HSPA8/HYOU1/HSPA1A/HSPA1B/HSP90AA1/B2M/DNAJA2/SNRNP70	11
BP	GO:0048863	stem cell differentiation	41/1181	268/17653	5.58619e-07	1.38031e-05	1.15026e-05	HSPA9/HNRNPU/XRCC5/TACSTD2/EPCAM/HIST1H3A/HIST1H3D/HIST1H3C/HIST1H3E/HIST1H3I/HIST1H3G/HIST1H3J/HIST1H3H/HIST1H3B/HIST1H3F/CFL1/OCIAD1/H3F3A/H3F3B/UBA52/HIST1H4I/HIST1H4A/HIST1H4D/HIST1H4F/HIST1H4K/HIST1H4J/HIST1H4C/HIST1H4H/HIST1H4B/HIST1H4E/HIST1H4L/HIST2H4A/HIST4H4/HIST2H4B/HIST2H3C/HIST2H3A/HIST2H3D/CORO1C/NOLC1/TCOF1/PSME2	41
BP	GO:0010257	NADH dehydrogenase complex assembly	17/1181	64/17653	6.55857e-07	1.60477e-05	1.33731e-05	NDUFS3/ACAD9/NDUFA8/NDUFAF2/NDUFS1/NDUFV2/NDUFV1/NDUFA10/NDUFS2/NDUFAB1/NDUFB11/NDUFB10/ECSIT/NDUFS6/NDUFS8/NDUFS5/NDUFA7	17
BP	GO:0032981	mitochondrial respiratory chain complex I assembly	17/1181	64/17653	6.55857e-07	1.60477e-05	1.33731e-05	NDUFS3/ACAD9/NDUFA8/NDUFAF2/NDUFS1/NDUFV2/NDUFV1/NDUFA10/NDUFS2/NDUFAB1/NDUFB11/NDUFB10/ECSIT/NDUFS6/NDUFS8/NDUFS5/NDUFA7	17
BP	GO:0050821	protein stabilization	29/1181	159/17653	6.80989e-07	1.65818e-05	1.38181e-05	HSPD1/FLNA/CALR/RTN4/GAPDH/HSPA1A/HSPA1B/PHB/PHB2/PPIB/ATP1B1/HSP90AA1/SEL1L/RPS7/HSP90AB1/LAMP1/STX12/LAMP2/RPL5/HIST1H1B/PARK7/RPL11/RPL23/WFS1/TCP1/CCT3/HIP1R/ZNF207/SYVN1	29
BP	GO:0043487	regulation of RNA stability	30/1181	168/17653	7.0297e-07	1.70343e-05	1.41952e-05	HSPA8/NPM1/HNRNPU/VIM/PABPC1/YBX1/HSPA1A/SYNCRIP/HNRNPC/SET/DHX9/PABPC4/HNRNPD/HNRNPR/KHSRP/IGF2BP3/HNRNPA0/ELAVL1/TARDBP/YWHAZ/SERBP1/UBA52/ANP32A/IGF2BP2/YWHAB/THRAP3/HSPB1/TBRG4/DKC1/PSME2	30
BP	GO:0036503	ERAD pathway	21/1181	94/17653	7.78279e-07	1.85976e-05	1.5498e-05	HSPA5/HSP90B1/VCP/UGGT1/BCAP31/FAF2/HM13/SEL1L/ERLIN2/CAV1/ERLIN1/ERLEC1/WFS1/UBE4A/UBXN4/TOR1A/DERL2/TMUB1/DERL1/SDF2L1/SYVN1	21
BP	GO:0043488	regulation of mRNA stability	29/1181	160/17653	7.79515e-07	1.85976e-05	1.5498e-05	HSPA8/NPM1/HNRNPU/VIM/PABPC1/YBX1/HSPA1A/SYNCRIP/HNRNPC/SET/DHX9/PABPC4/HNRNPD/HNRNPR/KHSRP/IGF2BP3/HNRNPA0/ELAVL1/TARDBP/YWHAZ/SERBP1/UBA52/ANP32A/IGF2BP2/YWHAB/THRAP3/HSPB1/TBRG4/PSME2	29
BP	GO:0000381	regulation of alternative mRNA splicing, via spliceosome	14/1181	45/17653	7.80643e-07	1.85976e-05	1.5498e-05	HNRNPA1/HNRNPL/HNRNPU/PTBP1/DDX5/DDX17/SRSF6/RBMX/THRAP3/SRSF2/RBM25/RBM4/EFCAB5/MBNL1	14
BP	GO:0006403	RNA localization	37/1181	233/17653	7.84209e-07	1.85976e-05	1.5498e-05	LRPPRC/HNRNPA2B1/HNRNPA1/NPM1/HNRNPU/TST/EIF5A/DHX9/DDX39B/DDX39A/RPSA/KHSRP/IGF2BP3/SRSF1/KHDRBS1/SRSF7/U2AF2/TOMM20/SRSF3/SRSF6/SSB/IGF2BP2/MVP/SRSF4/SRSF2/U2AF1/SRRM1/NUP155/TCP1/MYO1C/CCT3/AAAS/G3BP2/RPS15/DKC1/FBL/SRSF9	37
BP	GO:0006888	ER to Golgi vesicle-mediated transport	34/1181	205/17653	7.86022e-07	1.85976e-05	1.5498e-05	VCP/LMAN1/VAPA/HYOU1/LMAN2/BCAP31/RAB1A/RAB1B/TMED9/VAPB/TMED10/SCFD1/TMED2/SEC22B/TMED4/TICAM2/CD55/NSF/CD59/MCFD2/ERGIC1/COPG1/SPTAN1/GOSR2/SPTBN1/STX18/YIPF5/CTSZ/ARFGAP1/YIF1A/GOLGA2/TMED1/CNIH4/DYNLL1	34
BP	GO:0006734	NADH metabolic process	13/1181	39/17653	7.93854e-07	1.86947e-05	1.55789e-05	VCP/PKM/MDH2/GPD2/PCK2/ENO1/OGDH/GAPDH/PGK1/HK1/ALDOA/ADPGK/TPI1	13
BP	GO:0050878	regulation of body fluid levels	63/1181	499/17653	8.02048e-07	1.87994e-05	1.56662e-05	FLNA/KRT1/ACTB/ANXA2/ITGA2/LMAN1/AGR2/GNB1/RHOA/HRNR/C1QBP/PABPC4/F3/HIST1H3A/HIST1H3D/HIST1H3C/HIST1H3E/HIST1H3I/HIST1H3G/HIST1H3J/HIST1H3H/HIST1H3B/HIST1H3F/CDC42/TSPAN8/GNAS/COX2/ITPR3/RAC1/GBA/H3F3A/H3F3B/RAC2/CD59/YWHAZ/HIST2H3C/HIST2H3A/HIST2H3D/AK3/CEACAM1/AKAP1/RHOG/LNPK/CYP4F11/CAV1/WFS1/SRC/VAMP8/HSPB1/FLG/PROCR/EHD1/VPS45/OAS2/CYBA/VCL/ANO6/RAP2B/PLAU/SERPINE1/VKORC1/APOH/LCP2	63
BP	GO:0030260	entry into host cell	26/1181	135/17653	8.66872e-07	1.9946e-05	1.66217e-05	P4HB/ITGB1/ITGA2/CTNND1/HSPA1A/HSPA1B/TFRC/EGFR/EPHA2/RPSA/SCARB2/CTNNB1/CD55/PPIA/SLC1A5/F11R/UBA52/LAMP1/LGALS1/ITGAV/CAV1/SRC/VAMP8/LDLR/CTSB/PVR	26
BP	GO:0044409	entry into host	26/1181	135/17653	8.66872e-07	1.9946e-05	1.66217e-05	P4HB/ITGB1/ITGA2/CTNND1/HSPA1A/HSPA1B/TFRC/EGFR/EPHA2/RPSA/SCARB2/CTNNB1/CD55/PPIA/SLC1A5/F11R/UBA52/LAMP1/LGALS1/ITGAV/CAV1/SRC/VAMP8/LDLR/CTSB/PVR	26
BP	GO:0051806	entry into cell of other organism involved in symbiotic interaction	26/1181	135/17653	8.66872e-07	1.9946e-05	1.66217e-05	P4HB/ITGB1/ITGA2/CTNND1/HSPA1A/HSPA1B/TFRC/EGFR/EPHA2/RPSA/SCARB2/CTNNB1/CD55/PPIA/SLC1A5/F11R/UBA52/LAMP1/LGALS1/ITGAV/CAV1/SRC/VAMP8/LDLR/CTSB/PVR	26
BP	GO:0051828	entry into other organism involved in symbiotic interaction	26/1181	135/17653	8.66872e-07	1.9946e-05	1.66217e-05	P4HB/ITGB1/ITGA2/CTNND1/HSPA1A/HSPA1B/TFRC/EGFR/EPHA2/RPSA/SCARB2/CTNNB1/CD55/PPIA/SLC1A5/F11R/UBA52/LAMP1/LGALS1/ITGAV/CAV1/SRC/VAMP8/LDLR/CTSB/PVR	26
BP	GO:0044743	protein transmembrane import into intracellular organelle	13/1181	40/17653	1.10437e-06	2.52946e-05	2.10788e-05	HSPD1/TOMM40/GRPEL1/TIMM50/TIMM13/PEX14/TOMM20/AGK/TIMM44/TOMM22/CHCHD4/TIMM23/TOMM7	13
BP	GO:0046394	carboxylic acid biosynthetic process	55/1181	419/17653	1.2002e-06	2.73645e-05	2.28037e-05	CLTC/PKM/SHMT2/GOT2/GLUD1/ACADVL/DHRS9/ENO1/ALDH18A1/OGDH/GAPDH/OAT/PGK1/GLS/HK1/SCP2/ATP5IF1/ACSL3/BCAT2/MGLL/ALDOA/ATP2B4/HSD17B12/AP2A1/PLOD3/LDHA/HACD3/HSD17B4/PLOD2/PARK7/ANXA1/CEACAM1/ERLIN2/TECR/NDUFAB1/GATM/ERLIN1/MTHFD1/PTGES/ACSS1/PLOD1/PTGES2/ADPGK/SUCLA2/NUP155/HSD17B8/CBR1/MECR/MIF/AAAS/ELOVL1/ACOT8/TPI1/MTHFD1L/KYNU	55
BP	GO:0006458	'de novo' protein folding	15/1181	53/17653	1.23016e-06	2.77951e-05	2.31626e-05	HSPD1/HSPA5/HSPA9/HSPA8/UGGT1/HYOU1/ERO1A/HSPA1A/HSPA1B/HSPE1/CHCHD4/TOR1A/TCP1/CCT3/SELENOF	15
BP	GO:0034508	centromere complex assembly	15/1181	53/17653	1.23016e-06	2.77951e-05	2.31626e-05	NPM1/HIST1H4I/HIST1H4A/HIST1H4D/HIST1H4F/HIST1H4K/HIST1H4J/HIST1H4C/HIST1H4H/HIST1H4B/HIST1H4E/HIST1H4L/HIST2H4A/HIST4H4/HIST2H4B	15
BP	GO:0043624	cellular protein complex disassembly	34/1181	209/17653	1.23978e-06	2.78866e-05	2.32388e-05	HSPA8/ASPH/EIF5A/CFL1/PEX14/MRPL12/NSF/MRPS31/MRPL28/MRPL50/MRPL37/MRPS27/PTCD3/MRPL52/MRPS22/MRPL2/MRPL41/SPTAN1/SPTBN1/MRPL46/MRPS35/MRPS36/CAPG/MRPL4/MRPS17/GFM2/DAP3/MRPS16/MRPS18B/MRPS23/MRPL19/MRPL10/MRPS26/MRPS15	34
BP	GO:0016053	organic acid biosynthetic process	55/1181	420/17653	1.29368e-06	2.89692e-05	2.4141e-05	CLTC/PKM/SHMT2/GOT2/GLUD1/ACADVL/DHRS9/ENO1/ALDH18A1/OGDH/GAPDH/OAT/PGK1/GLS/HK1/SCP2/ATP5IF1/ACSL3/BCAT2/MGLL/ALDOA/ATP2B4/HSD17B12/AP2A1/PLOD3/LDHA/HACD3/HSD17B4/PLOD2/PARK7/ANXA1/CEACAM1/ERLIN2/TECR/NDUFAB1/GATM/ERLIN1/MTHFD1/PTGES/ACSS1/PLOD1/PTGES2/ADPGK/SUCLA2/NUP155/HSD17B8/CBR1/MECR/MIF/AAAS/ELOVL1/ACOT8/TPI1/MTHFD1L/KYNU	55
BP	GO:0006851	mitochondrial calcium ion transmembrane transport	10/1181	24/17653	1.42641e-06	3.17993e-05	2.64994e-05	VDAC1/LETM1/STOML2/PHB/OPA1/PHB2/PMPCA/AFG3L2/PMPCB/MCU	10
BP	GO:0051084	'de novo' posttranslational protein folding	12/1181	35/17653	1.49946e-06	3.32801e-05	2.77334e-05	HSPA5/HSPA9/HSPA8/UGGT1/HYOU1/ERO1A/HSPA1A/HSPA1B/HSPE1/CHCHD4/TOR1A/SELENOF	12
BP	GO:0034250	positive regulation of cellular amide metabolic process	26/1181	140/17653	1.78201e-06	3.9377e-05	3.28142e-05	ITGA2/NPM1/VIM/EEF2/PABPC1/RHOA/EIF5A/C1QBP/DHX9/DDX39B/HNRNPD/RACK1/KHDRBS1/ELAVL1/KRT17/RPS4X/RPL5/DDX3X/RPL26/DNAJC3/PICALM/RBM3/MRPS27/TRMT10C/APP/RPS9	26
BP	GO:0032069	regulation of nuclease activity	11/1181	30/17653	1.91747e-06	4.21844e-05	3.51537e-05	HSPA5/NPM1/PTPN1/HSPA1A/VAPB/HMGB1/RPS3/OAS1/OAS2/OAS3/TCEA1	11
BP	GO:0034329	cell junction assembly	35/1181	223/17653	2.03787e-06	4.46374e-05	3.71978e-05	PLEC/FLNA/ACTB/ACTN4/ITGA6/ITGB4/CTNNA1/JUP/ITGA2/KRT14/RHOC/RHOA/KRT5/CDC42/CTNNB1/RAP1B/RAC1/VMP1/F11R/IQGAP1/DLG1/CORO1C/MTDH/LAMA3/CAV1/MACF1/SRC/CTTN/LAMB3/CD151/MYO1C/VCL/COL17A1/S100A10/PTK2	35
BP	GO:0006085	acetyl-CoA biosynthetic process	9/1181	20/17653	2.22917e-06	4.86152e-05	4.05127e-05	DLD/DLAT/PDHA1/ACAT1/PDHB/PDPR/PDHX/ACSS1/MPC1	9
BP	GO:0048002	antigen processing and presentation of peptide antigen	31/1181	187/17653	2.40471e-06	5.22165e-05	4.35137e-05	PDIA3/CLTC/CANX/CALR/CTSD/AP2B1/BCAP31/SNAP23/RAB7A/SEC22B/VAMP3/AP1B1/AP2A1/B2M/TAP1/HLA-DRB1/ITGAV/AP2A2/ERAP1/LGMN/VAMP8/TAP2/LNPEP/AP1G1/CYBA/CTSE/IFI30/AP1M2/TAPBP/DYNLL1/PSME2	31
BP	GO:0032984	protein-containing complex disassembly	44/1181	314/17653	2.50868e-06	5.42393e-05	4.51994e-05	VCP/HSPA8/ASPH/EIF5A/SET/CTNNB1/CFL1/PEX14/MRPL12/NSF/GBA/PPP1CA/MRPS31/LAMP2/MRPL28/RPL23/MRPL50/MRPL37/CAV1/MRPS27/PTCD3/MRPL52/MRPS22/MRPL2/MRPL41/VAMP8/SPTAN1/SPTBN1/MRPL46/MRPS35/MRPS36/CAPG/MRPL4/MRPS17/GFM2/DAP3/MRPS16/MRPS18B/MRPS23/MRPL19/MRPL10/MRPS26/MRPS15/HMGA1	44
BP	GO:0050657	nucleic acid transport	32/1181	197/17653	2.61138e-06	5.59773e-05	4.66477e-05	LRPPRC/HNRNPA2B1/HNRNPA1/NPM1/TST/EIF5A/DHX9/DDX39B/DDX39A/RPSA/KHSRP/IGF2BP3/SRSF1/KHDRBS1/SRSF7/U2AF2/TOMM20/SRSF3/SRSF6/SSB/IGF2BP2/MVP/SRSF4/SRSF2/U2AF1/SRRM1/NUP155/MYO1C/AAAS/G3BP2/RPS15/SRSF9	32
BP	GO:0050658	RNA transport	32/1181	197/17653	2.61138e-06	5.59773e-05	4.66477e-05	LRPPRC/HNRNPA2B1/HNRNPA1/NPM1/TST/EIF5A/DHX9/DDX39B/DDX39A/RPSA/KHSRP/IGF2BP3/SRSF1/KHDRBS1/SRSF7/U2AF2/TOMM20/SRSF3/SRSF6/SSB/IGF2BP2/MVP/SRSF4/SRSF2/U2AF1/SRRM1/NUP155/MYO1C/AAAS/G3BP2/RPS15/SRSF9	32
BP	GO:0021762	substantia nigra development	13/1181	43/17653	2.77993e-06	5.90852e-05	4.92377e-05	HSPA5/ACTB/GLUD1/POTEE/MAOB/RHOA/ATP5PF/CDC42/COX6B1/NDUFS3/ATP5PB/CNP/DYNLL1	13
BP	GO:1903573	negative regulation of response to endoplasmic reticulum stress	13/1181	43/17653	2.77993e-06	5.90852e-05	4.92377e-05	HSPA5/HYOU1/PTPN1/HSPA1A/OPA1/RACK1/PARK7/DNAJC3/ERLEC1/WFS1/DERL2/TXNDC12/SYVN1	13
BP	GO:0046949	fatty-acyl-CoA biosynthetic process	11/1181	31/17653	2.79291e-06	5.91106e-05	4.92589e-05	ACSL5/ACSL3/ACAT1/ACSL4/HSD17B12/SLC25A1/PPT1/GCDH/TECR/HSD17B8/ELOVL1	11
BP	GO:1905897	regulation of response to endoplasmic reticulum stress	18/1181	78/17653	2.88014e-06	6.07008e-05	5.0584e-05	HSPA5/AGR2/HYOU1/PTPN1/HSPA1A/BCAP31/OPA1/RACK1/ERP29/PARK7/DNAJC3/CAV1/ERLEC1/WFS1/TMEM33/DERL2/TXNDC12/SYVN1	18
BP	GO:0006090	pyruvate metabolic process	25/1181	135/17653	2.9547e-06	6.17532e-05	5.1461e-05	PKM/PCK2/ENO1/OGDH/DLD/GAPDH/ME2/DLAT/PGK1/BSG/HK1/ME3/PDHA1/PC/PDHB/ALDOA/LDHA/PDPR/PDHX/ADPGK/MPC1/NUP155/SLC16A3/AAAS/TPI1	25
BP	GO:0031123	RNA 3'-end processing	25/1181	135/17653	2.9547e-06	6.17532e-05	5.1461e-05	HSD17B10/PABPC1/DDX39B/DDX39A/RPSA/SRSF1/SRSF7/U2AF2/SRSF3/SRSF6/SSB/SRSF4/GRSF1/SRSF2/U2AF1/ELAC2/MTPAP/SRRM1/NUDT21/TRMT10C/APP/DKC1/FBL/SRSF9/CSTF2	25
BP	GO:1903076	regulation of protein localization to plasma membrane	19/1181	86/17653	3.08517e-06	6.42124e-05	5.35103e-05	CLTC/ITGB1/AGR2/EZR/EGFR/EPHA2/ACSL3/RACK1/CSNK2A1/STX7/ITGA3/DLG1/STX4/RHOG/PICALM/VAMP8/SPTBN1/RER1/TMBIM1	19
BP	GO:1904375	regulation of protein localization to cell periphery	20/1181	94/17653	3.17785e-06	6.561e-05	5.4675e-05	CLTC/ITGB1/AGR2/EZR/EGFR/EPHA2/ACSL3/RACK1/CSNK2A1/STX7/ITGA3/DLG1/NUMA1/STX4/RHOG/PICALM/VAMP8/SPTBN1/RER1/TMBIM1	20
BP	GO:1901568	fatty acid derivative metabolic process	28/1181	162/17653	3.17848e-06	6.561e-05	5.4675e-05	ACSL5/PON2/OXCT1/CYP2S1/ACSL3/MGLL/ACAT1/ACSL4/HMGCL/HSD17B12/CYP4F3/HSD17B4/SLC25A1/BDH1/ANXA1/PPT1/ABCC1/GCDH/TECR/PTGES/PTGES2/ACOX1/HSD17B8/CBR1/ZADH2/MIF/ELOVL1/GPX1	28
BP	GO:0043486	histone exchange	15/1181	57/17653	3.36973e-06	6.92729e-05	5.77274e-05	NPM1/HIST1H4I/HIST1H4A/HIST1H4D/HIST1H4F/HIST1H4K/HIST1H4J/HIST1H4C/HIST1H4H/HIST1H4B/HIST1H4E/HIST1H4L/HIST2H4A/HIST4H4/HIST2H4B	15
BP	GO:1905475	regulation of protein localization to membrane	28/1181	163/17653	3.59719e-06	7.36469e-05	6.13724e-05	CLTC/ITGB1/AGR2/EZR/EGFR/EPHA2/AP2B1/ACSL3/RACK1/CSNK2A1/STX7/ITGA3/YWHAZ/MESD/DLG1/STX4/RHOG/YWHAB/PICALM/FIS1/VAMP8/SPTBN1/MYO1C/MFF/RER1/TMBIM1/BID/DYNLL1	28
BP	GO:0051236	establishment of RNA localization	32/1181	200/17653	3.63668e-06	7.41528e-05	6.1794e-05	LRPPRC/HNRNPA2B1/HNRNPA1/NPM1/TST/EIF5A/DHX9/DDX39B/DDX39A/RPSA/KHSRP/IGF2BP3/SRSF1/KHDRBS1/SRSF7/U2AF2/TOMM20/SRSF3/SRSF6/SSB/IGF2BP2/MVP/SRSF4/SRSF2/U2AF1/SRRM1/NUP155/MYO1C/AAAS/G3BP2/RPS15/SRSF9	32
BP	GO:0045727	positive regulation of translation	23/1181	120/17653	3.98128e-06	8.08507e-05	6.73756e-05	ITGA2/NPM1/VIM/EEF2/PABPC1/RHOA/EIF5A/C1QBP/DHX9/DDX39B/HNRNPD/KHDRBS1/ELAVL1/KRT17/RPS4X/RPL5/DDX3X/RPL26/DNAJC3/RBM3/MRPS27/TRMT10C/RPS9	23
BP	GO:1902369	negative regulation of RNA catabolic process	14/1181	51/17653	4.14089e-06	8.37528e-05	6.9794e-05	LRPPRC/HNRNPU/PABPC1/YBX1/SYNCRIP/HNRNPC/DHX9/HNRNPD/HNRNPA0/ELAVL1/TARDBP/SLIRP/THRAP3/DKC1	14
BP	GO:0031330	negative regulation of cellular catabolic process	35/1181	230/17653	4.17462e-06	8.40959e-05	7.00799e-05	ANXA2/LRPPRC/HNRNPU/PABPC1/YBX1/SYNCRIP/HNRNPC/DHX9/HNRNPD/HNRNPA0/SCFD1/ELAVL1/TARDBP/SEC22B/SLIRP/RPS7/HSP90AB1/ATP2B4/RPL5/PARK7/TIMP1/RPL11/RPL23/ERLEC1/THRAP3/SDCBP/POLDIP2/HTRA2/DERL2/PML/GOLGA2/TSPO/DKC1/SNRNP70/PTK2	35
BP	GO:0015931	nucleobase-containing compound transport	36/1181	240/17653	4.2838e-06	8.59502e-05	7.16252e-05	LRPPRC/HNRNPA2B1/HNRNPA1/NPM1/SLC25A24/SLC25A5/SLC25A6/TST/EIF5A/DHX9/DDX39B/DDX39A/RPSA/KHSRP/IGF2BP3/SRSF1/KHDRBS1/SRSF7/U2AF2/TOMM20/SRSF3/SRSF6/SSB/IGF2BP2/MVP/SRSF4/SRSF2/U2AF1/SRRM1/NUP155/MYO1C/SLC25A32/AAAS/G3BP2/RPS15/SRSF9	36
BP	GO:0002478	antigen processing and presentation of exogenous peptide antigen	29/1181	174/17653	4.51359e-06	9.01998e-05	7.51665e-05	PDIA3/CLTC/CANX/CALR/CTSD/AP2B1/SNAP23/RAB7A/SEC22B/VAMP3/AP1B1/AP2A1/B2M/TAP1/HLA-DRB1/ITGAV/AP2A2/LGMN/VAMP8/TAP2/LNPEP/AP1G1/CYBA/CTSE/IFI30/AP1M2/TAPBP/DYNLL1/PSME2	29
BP	GO:0018279	protein N-linked glycosylation via asparagine	13/1181	45/17653	4.89369e-06	9.74076e-05	8.1173e-05	VCP/RPN2/RPN1/LMAN1/UGGT1/DDOST/STT3A/MCFD2/ST3GAL1/DPM1/DPM3/MAGT1/SYVN1	13
BP	GO:0007044	cell-substrate junction assembly	19/1181	89/17653	5.28324e-06	0.000104746	8.72883e-05	PLEC/ITGA6/ITGB4/ITGA2/KRT14/RHOA/KRT5/RAC1/IQGAP1/CORO1C/LAMA3/MACF1/SRC/CTTN/LAMB3/CD151/COL17A1/S100A10/PTK2	19
BP	GO:0045807	positive regulation of endocytosis	24/1181	131/17653	5.62437e-06	0.00011107	9.25586e-05	ACTN4/ANXA2/CALR/ITGA2/HNRNPK/LMAN2/AP2B1/RAB21/AP2A1/B2M/ITGAV/PPT1/PICALM/LYAR/LDLR/CD63/AHSG/TOR1A/CD47/CD151/CYBA/ANO6/HIP1R/SERPINE1	24
BP	GO:0030433	ubiquitin-dependent ERAD pathway	17/1181	74/17653	5.77026e-06	0.000113504	9.45869e-05	HSPA5/HSP90B1/VCP/BCAP31/FAF2/SEL1L/ERLIN2/CAV1/ERLIN1/ERLEC1/WFS1/UBE4A/UBXN4/DERL2/TMUB1/DERL1/SYVN1	17
BP	GO:0018196	peptidyl-asparagine modification	13/1181	46/17653	6.4065e-06	0.000125527	0.000104606	VCP/RPN2/RPN1/LMAN1/UGGT1/DDOST/STT3A/MCFD2/ST3GAL1/DPM1/DPM3/MAGT1/SYVN1	13
BP	GO:0019079	viral genome replication	22/1181	115/17653	6.62252e-06	0.000129255	0.000107713	VCP/HSPA8/VAPA/PABPC1/CDC42/ISG15/DDX5/VAPB/PPIB/ILF3/MAVS/PCBP1/PPIA/TRIM28/HACD3/PCBP2/DDX3X/OAS1/LAMTOR5/OAS2/BST2/OAS3	22
BP	GO:0006164	purine nucleotide biosynthetic process	41/1181	295/17653	6.70923e-06	0.00013044	0.0001087	ATP5F1B/VCP/PKM/ATP5F1A/ENO1/OGDH/SLC25A13/GAPDH/AK2/PGK1/STOML2/HK1/ATP5PF/ATP5F1C/ATP5PO/ACAT1/GNAI3/CYC1/ATP5PD/ALDOA/COX5B/ATP5PB/GNAI2/LDHA/ATP5F1D/COASY/ATP5MF/NIPSNAP2/MTHFD1/ADPGK/NUP155/ATP8/ATP5ME/ATP6V0A1/ATP6/CAP1/PARP1/AAAS/TPI1/ATP5F1E/ATP5MG	41
BP	GO:1903829	positive regulation of cellular protein localization	46/1181	347/17653	6.80263e-06	0.000131745	0.000109788	ITGB1/JUP/AGR2/RTN4/MSN/EZR/EGFR/DDRGK1/EPHA2/AP2B1/BCAP31/ACSL3/CDC42/RACK1/MAVS/NPTN/HSP90AB1/TM9SF4/RAC2/ITGA3/YWHAZ/MESD/IQGAP1/DLG1/NUMA1/STX4/PARK7/TMEM173/EMD/RHOG/IPO5/YWHAB/FIS1/SRC/SPTBN1/TCP1/HTRA2/MYO1C/CCT3/MFF/RER1/CYB5R1/DKC1/TOMM7/BID/DYNLL1	46
BP	GO:0006733	oxidoreduction coenzyme metabolic process	30/1181	187/17653	6.86467e-06	0.000132435	0.000110363	VCP/PKM/MDH2/GPD2/PCK2/ENO1/OGDH/DLD/GAPDH/ME2/PGK1/HK1/NNT/PDHA1/IDH2/PDHB/ALDOA/LDHA/COQ9/FDXR/PDHX/ADPGK/MPC1/NUP155/COQ6/TKT/AAAS/TPI1/DCXR/KYNU	30
BP	GO:0035337	fatty-acyl-CoA metabolic process	12/1181	40/17653	7.34466e-06	0.000141153	0.000117627	ACSL5/ACSL3/ACAT1/ACSL4/HSD17B12/HSD17B4/SLC25A1/PPT1/GCDH/TECR/HSD17B8/ELOVL1	12
BP	GO:0072522	purine-containing compound biosynthetic process	42/1181	307/17653	7.74618e-06	0.000148301	0.000123584	ATP5F1B/VCP/PKM/ATP5F1A/ENO1/OGDH/SLC25A13/GAPDH/AK2/PGK1/STOML2/HK1/ATP5PF/ATP5F1C/ATP5PO/ACAT1/GNAI3/CYC1/ATP5PD/ALDOA/COX5B/ATP5PB/GNAI2/LDHA/ATP5F1D/COASY/ATP5MF/NIPSNAP2/MTHFD1/ADPGK/NUP155/ATP8/ATP5ME/ATP6V0A1/ATP6/CAP1/PARP1/AAAS/TPI1/ATP5F1E/ATP5MG/MTHFD1L	42
BP	GO:1905477	positive regulation of protein localization to membrane	22/1181	117/17653	8.85164e-06	0.000168821	0.000140684	ITGB1/AGR2/EZR/EGFR/EPHA2/AP2B1/ACSL3/RACK1/ITGA3/YWHAZ/MESD/DLG1/STX4/RHOG/YWHAB/FIS1/SPTBN1/MYO1C/MFF/RER1/BID/DYNLL1	22
BP	GO:0006369	termination of RNA polymerase II transcription	16/1181	69/17653	9.50827e-06	0.000180657	0.000150548	DDX39B/DDX39A/SRSF1/SRSF7/U2AF2/SRSF3/SNRPD3/SRSF6/SRSF4/SRSF2/U2AF1/SRRM1/SNRPB/NUDT21/SRSF9/CSTF2	16
BP	GO:0006914	autophagy	58/1181	482/17653	9.73626e-06	0.000183598	0.000152998	CLTC/ITGB4/VCP/HSPA8/VDAC1/EEF1A1/GAPDH/TOMM70/CTSD/TOMM40/RAB1A/ATP5IF1/RAB1B/SPTLC2/SPTLC1/PSAP/SCFD1/CSNK2A1/RAB7A/HSP90AA1/GNAI3/SEC22B/RALB/TOMM20/GBA/HMGB1/VMP1/UBA52/TOMM22/STX12/LAMP2/TM9SF1/PARK7/MTDH/FIS1/RAB8A/CAPNS1/STBD1/ATP6V0D1/SRC/VAMP8/HSPB1/LAMTOR1/CTTN/HAX1/LAMTOR5/POLDIP2/HTRA2/ATP6V0A1/LAMTOR3/GOLGA2/PGAM5/TSPO/TOMM7/CISD2/DYNLL1/SNRNP70/PTK2	58
BP	GO:0061919	process utilizing autophagic mechanism	58/1181	482/17653	9.73626e-06	0.000183598	0.000152998	CLTC/ITGB4/VCP/HSPA8/VDAC1/EEF1A1/GAPDH/TOMM70/CTSD/TOMM40/RAB1A/ATP5IF1/RAB1B/SPTLC2/SPTLC1/PSAP/SCFD1/CSNK2A1/RAB7A/HSP90AA1/GNAI3/SEC22B/RALB/TOMM20/GBA/HMGB1/VMP1/UBA52/TOMM22/STX12/LAMP2/TM9SF1/PARK7/MTDH/FIS1/RAB8A/CAPNS1/STBD1/ATP6V0D1/SRC/VAMP8/HSPB1/LAMTOR1/CTTN/HAX1/LAMTOR5/POLDIP2/HTRA2/ATP6V0A1/LAMTOR3/GOLGA2/PGAM5/TSPO/TOMM7/CISD2/DYNLL1/SNRNP70/PTK2	58
BP	GO:0019884	antigen processing and presentation of exogenous antigen	29/1181	181/17653	9.96387e-06	0.000186488	0.000155407	PDIA3/CLTC/CANX/CALR/CTSD/AP2B1/SNAP23/RAB7A/SEC22B/VAMP3/AP1B1/AP2A1/B2M/TAP1/HLA-DRB1/ITGAV/AP2A2/LGMN/VAMP8/TAP2/LNPEP/AP1G1/CYBA/CTSE/IFI30/AP1M2/TAPBP/DYNLL1/PSME2	29
BP	GO:0061013	regulation of mRNA catabolic process	29/1181	181/17653	9.96387e-06	0.000186488	0.000155407	HSPA8/NPM1/HNRNPU/VIM/PABPC1/YBX1/HSPA1A/SYNCRIP/HNRNPC/SET/DHX9/PABPC4/HNRNPD/HNRNPR/KHSRP/IGF2BP3/HNRNPA0/ELAVL1/TARDBP/YWHAZ/SERBP1/UBA52/ANP32A/IGF2BP2/YWHAB/THRAP3/HSPB1/TBRG4/PSME2	29
BP	GO:0006303	double-strand break repair via nonhomologous end joining	17/1181	77/17653	1.01921e-05	0.000190051	0.000158376	XRCC5/XRCC6/PRKDC/HIST1H4I/HIST1H4A/HIST1H4D/HIST1H4F/HIST1H4K/HIST1H4J/HIST1H4C/HIST1H4H/HIST1H4B/HIST1H4E/HIST1H4L/HIST2H4A/HIST4H4/HIST2H4B	17
BP	GO:0030970	retrograde protein transport, ER to cytosol	10/1181	29/17653	1.07007e-05	0.00019714	0.000164283	HSP90B1/VCP/BCAP31/FAF2/HM13/SEL1L/ERLEC1/DERL2/DERL1/SYVN1	10
BP	GO:0050686	negative regulation of mRNA processing	10/1181	29/17653	1.07007e-05	0.00019714	0.000164283	HNRNPA2B1/HNRNPK/PTBP1/C1QBP/SRSF7/U2AF2/SRSF6/SRSF4/RBMX/SRSF9	10
BP	GO:1903513	endoplasmic reticulum to cytosol transport	10/1181	29/17653	1.07007e-05	0.00019714	0.000164283	HSP90B1/VCP/BCAP31/FAF2/HM13/SEL1L/ERLEC1/DERL2/DERL1/SYVN1	10
BP	GO:0009895	negative regulation of catabolic process	38/1181	270/17653	1.07688e-05	0.00019714	0.000164283	FLNA/ANXA2/LRPPRC/HNRNPU/PABPC1/YBX1/EGFR/SYNCRIP/HNRNPC/DHX9/PHB/HNRNPD/HNRNPA0/SCFD1/ELAVL1/TARDBP/SEC22B/SLIRP/RPS7/HSP90AB1/ATP2B4/RPL5/PARK7/TIMP1/RPL11/RPL23/ERLEC1/THRAP3/SDCBP/POLDIP2/HTRA2/DERL2/PML/GOLGA2/TSPO/DKC1/SNRNP70/PTK2	38
BP	GO:0034330	cell junction organization	38/1181	270/17653	1.07688e-05	0.00019714	0.000164283	PLEC/FLNA/ACTB/ACTN4/ITGA6/ITGB4/CTNNA1/JUP/ITGA2/CTNND1/KRT14/RHOC/RHOA/KRT5/CDC42/CTNNB1/RAP1B/RAC1/VMP1/F11R/DSG2/IQGAP1/DLG1/CORO1C/MTDH/LAMA3/CAV1/MACF1/SRC/CTTN/LAMB3/CD151/MYO1C/VCL/COL17A1/S100A10/PVR/PTK2	38
BP	GO:0009152	purine ribonucleotide biosynthetic process	40/1181	291/17653	1.12983e-05	0.00020608	0.000171734	ATP5F1B/VCP/PKM/ATP5F1A/ENO1/OGDH/SLC25A13/GAPDH/AK2/PGK1/STOML2/HK1/ATP5PF/ATP5F1C/ATP5PO/ACAT1/GNAI3/CYC1/ATP5PD/ALDOA/COX5B/ATP5PB/GNAI2/LDHA/ATP5F1D/COASY/ATP5MF/NIPSNAP2/ADPGK/NUP155/ATP8/ATP5ME/ATP6V0A1/ATP6/CAP1/PARP1/AAAS/TPI1/ATP5F1E/ATP5MG	40
BP	GO:0019882	antigen processing and presentation	33/1181	221/17653	1.16874e-05	0.000212405	0.000177004	PDIA3/CLTC/CANX/CALR/CTSD/AP2B1/BCAP31/SNAP23/RAB10/RAB7A/SEC22B/VAMP3/AP1B1/AP2A1/B2M/TAP1/HLA-DRB1/ITGAV/AP2A2/ERAP1/LGMN/VAMP8/TAP2/RAB6A/LNPEP/AP1G1/CYBA/CTSE/IFI30/AP1M2/TAPBP/DYNLL1/PSME2	33
BP	GO:0046718	viral entry into host cell	22/1181	119/17653	1.17392e-05	0.000212576	0.000177147	P4HB/ITGB1/ITGA2/HSPA1A/HSPA1B/TFRC/EGFR/EPHA2/RPSA/SCARB2/CD55/PPIA/SLC1A5/F11R/LAMP1/LGALS1/ITGAV/CAV1/VAMP8/LDLR/CTSB/PVR	22
BP	GO:0017148	negative regulation of translation	54/1181	442/17653	1.27308e-05	0.000229703	0.000191419	CALR/HNRNPA2B1/NCL/GAPDH/EGFR/SYNCRIP/DHX9/HNRNPD/HIST1H3A/HIST1H3D/HIST1H3C/HIST1H3E/HIST1H3I/HIST1H3G/HIST1H3J/HIST1H3H/HIST1H3B/HIST1H3F/HNRNPR/KHSRP/IGF2BP3/DDX5/RACK1/ELAVL1/ILF3/H3F3A/H3F3B/RPS3/HIST1H4I/HIST1H4A/HIST1H4D/HIST1H4F/HIST1H4K/HIST1H4J/HIST1H4C/HIST1H4H/HIST1H4B/HIST1H4E/HIST1H4L/HIST2H4A/HIST4H4/HIST2H4B/HIST2H3C/HIST2H3A/HIST2H3D/CAPRIN1/IGF2BP2/DDX3X/PURA/RPL13A/EPRS/NUP155/…	54
BP	GO:0043489	RNA stabilization	12/1181	42/17653	1.28315e-05	0.000230692	0.000192243	HNRNPU/PABPC1/YBX1/SYNCRIP/HNRNPC/DHX9/HNRNPD/HNRNPA0/ELAVL1/TARDBP/THRAP3/DKC1	12
BP	GO:0006892	post-Golgi vesicle-mediated transport	19/1181	95/17653	1.43159e-05	0.00025646	0.000213717	KRT18/ACSL3/SNAP23/RAB10/RACK1/SCFD1/RAB14/VAMP3/SCAMP2/NSF/AP2A1/LAMP1/STX4/MACF1/VAMP8/GOSR2/SPTBN1/AP1G1/TGOLN2	19
BP	GO:0072524	pyridine-containing compound metabolic process	28/1181	175/17653	1.44648e-05	0.000258204	0.00021517	VCP/PKM/MDH2/GPD2/PCK2/ENO1/OGDH/DLD/GAPDH/ME2/PGK1/HK1/NNT/PDHA1/IDH2/PDHB/ALDOA/LDHA/PDHX/PNPO/ADPGK/MPC1/NUP155/TKT/AAAS/TPI1/DCXR/KYNU	28
BP	GO:0006084	acetyl-CoA metabolic process	11/1181	36/17653	1.45289e-05	0.000258428	0.000215357	DLD/DLST/DLAT/PDHA1/ACAT1/PDHB/PDPR/PDHX/ACSS1/MPC1/KYNU	11
BP	GO:0043044	ATP-dependent chromatin remodeling	17/1181	79/17653	1.46237e-05	0.000259197	0.000215997	ACTB/NPM1/HNRNPC/HIST1H4I/HIST1H4A/HIST1H4D/HIST1H4F/HIST1H4K/HIST1H4J/HIST1H4C/HIST1H4H/HIST1H4B/HIST1H4E/HIST1H4L/HIST2H4A/HIST4H4/HIST2H4B	17
BP	GO:0000027	ribosomal large subunit assembly	10/1181	30/17653	1.50923e-05	0.000265073	0.000220894	RPL3/RPL6/RPL12/RPL10/RPL5/RPL11/RPL23A/RPL38/RPL24/MDN1	10
BP	GO:1902175	regulation of oxidative stress-induced intrinsic apoptotic signaling pathway	10/1181	30/17653	1.50923e-05	0.000265073	0.000220894	P4HB/SOD2/TRAP1/NONO/SFPQ/PARK7/HSPB1/HTRA2/PARP1/GPX1	10
BP	GO:0000028	ribosomal small subunit assembly	8/1181	19/17653	1.52195e-05	0.000265073	0.000220894	RPSA/RPS10/RPS28/RPS14/RPS19/RPS5/RPL38/RPS15	8
BP	GO:0030150	protein import into mitochondrial matrix	8/1181	19/17653	1.52195e-05	0.000265073	0.000220894	TOMM40/GRPEL1/TIMM50/TOMM20/TIMM44/TOMM22/TIMM23/TOMM7	8
BP	GO:1902236	negative regulation of endoplasmic reticulum stress-induced intrinsic apoptotic signaling pathway	8/1181	19/17653	1.52195e-05	0.000265073	0.000220894	HYOU1/PTPN1/HSPA1A/OPA1/PARK7/WFS1/TXNDC12/SYVN1	8
BP	GO:0032527	protein exit from endoplasmic reticulum	12/1181	43/17653	1.67225e-05	0.000290242	0.000241869	HSP90B1/VCP/BCAP31/FAF2/HM13/SEL1L/TM9SF4/ERLEC1/GCC2/DERL2/DERL1/SYVN1	12
BP	GO:0045638	negative regulation of myeloid cell differentiation	18/1181	88/17653	1.73209e-05	0.000299592	0.00024966	HSPA9/CTNNB1/HIST1H4I/HIST1H4A/HIST1H4D/HIST1H4F/HIST1H4K/HIST1H4J/HIST1H4C/HIST1H4H/HIST1H4B/HIST1H4E/HIST1H4L/HIST2H4A/HIST4H4/HIST2H4B/CEACAM1/CLDN18	18
BP	GO:0034249	negative regulation of cellular amide metabolic process	55/1181	458/17653	1.74387e-05	0.000299716	0.000249764	CALR/HNRNPA2B1/NCL/GAPDH/EGFR/SYNCRIP/DHX9/HNRNPD/HIST1H3A/HIST1H3D/HIST1H3C/HIST1H3E/HIST1H3I/HIST1H3G/HIST1H3J/HIST1H3H/HIST1H3B/HIST1H3F/HNRNPR/KHSRP/IGF2BP3/DDX5/RACK1/ELAVL1/ILF3/H3F3A/H3F3B/RPS3/HIST1H4I/HIST1H4A/HIST1H4D/HIST1H4F/HIST1H4K/HIST1H4J/HIST1H4C/HIST1H4H/HIST1H4B/HIST1H4E/HIST1H4L/HIST2H4A/HIST4H4/HIST2H4B/HIST2H3C/HIST2H3A/HIST2H3D/CAPRIN1/IGF2BP2/DDX3X/PURA/RPL13A/EPRS/NUP155/…	55
BP	GO:0034599	cellular response to oxidative stress	39/1181	286/17653	1.74476e-05	0.000299716	0.000249764	P4HB/ATP2A2/AIFM1/LONP1/SLC25A24/ERO1A/SOD2/TRAP1/HSPA1A/HSPA1B/PRDX3/EGFR/PRDX5/NONO/HNRNPD/SFPQ/CTNNB1/RACK1/PSAP/CYCS/PPIF/RPS3/PRDX1/CAT/PARK7/ANXA1/TXNRD2/SRC/HSPB1/SRXN1/HTRA2/TXN/CYBA/PML/PARP1/GPX1/VKORC1L1/NQO1/ARL6IP5	39
BP	GO:0006979	response to oxidative stress	53/1181	436/17653	1.7594e-05	0.000301199	0.000250999	KRT1/P4HB/ATP2A2/AIFM1/LONP1/SLC25A24/ERO1A/EEF2/SOD2/PON2/TRAP1/HSPA1A/HSPA1B/PRDX3/EGFR/PRDX5/HMOX2/NONO/HNRNPD/SFPQ/CTNNB1/RACK1/PSAP/CYCS/PPIF/RPS3/PRDX1/LDHA/CAT/ETFDH/STX4/ADAM9/PARK7/ANXA1/S100A7/TXNRD2/NDUFS2/SRC/HSPB1/SRXN1/TOR1A/COX1/HTRA2/TXN/CYBA/NDUFS8/PML/PARP1/GPX1/APP/VKORC1L1/NQO1/ARL6IP5	53
BP	GO:0051028	mRNA transport	25/1181	149/17653	1.78838e-05	0.00030512	0.000254267	LRPPRC/HNRNPA2B1/HNRNPA1/EIF5A/DHX9/DDX39B/DDX39A/KHSRP/IGF2BP3/SRSF1/SRSF7/U2AF2/SRSF3/SRSF6/IGF2BP2/MVP/SRSF4/SRSF2/U2AF1/SRRM1/NUP155/MYO1C/AAAS/G3BP2/SRSF9	25
BP	GO:0006900	vesicle budding from membrane	19/1181	97/17653	1.95361e-05	0.000332181	0.000276817	ANXA2/LMAN1/VAPA/RAB1A/RAB1B/TMED9/VAPB/TMED10/SCFD1/TMED2/RAB7A/SEC22B/NSF/CD59/MCFD2/GOSR2/CTSZ/GOLGA2/S100A10	19
BP	GO:1901293	nucleoside phosphate biosynthetic process	47/1181	373/17653	2.08281e-05	0.000351921	0.000293267	ATP5F1B/VCP/PKM/ATP5F1A/ENO1/OGDH/SLC25A13/GAPDH/AK4/AK2/PGK1/STOML2/HK1/ATP5PF/ATP5F1C/ATP5PO/ACAT1/GNAI3/CYC1/IDH2/SUCLG1/ATP5PD/ALDOA/COX5B/ATP5PB/GNAI2/LDHA/ATP5F1D/DUT/COASY/ATP5MF/NIPSNAP2/MTHFD1/ADPGK/NUP155/ATP8/ATP5ME/ATP6V0A1/ATP6/CAP1/PARP1/AAAS/TPI1/ATP5F1E/ATP5MG/HDDC2/KYNU	47
BP	GO:0000245	spliceosomal complex assembly	14/1181	58/17653	2.09076e-05	0.000351921	0.000293267	DDX39B/SRSF1/SNRPD3/SF1/DDX1/SRSF6/SNRPD1/SNRPD2/SF3B1/RBMX/SCAF11/SNRPC/SNRNP200/SRSF9	14
BP	GO:1904377	positive regulation of protein localization to cell periphery	14/1181	58/17653	2.09076e-05	0.000351921	0.000293267	ITGB1/AGR2/EZR/EGFR/EPHA2/ACSL3/RACK1/ITGA3/DLG1/NUMA1/STX4/RHOG/SPTBN1/RER1	14
BP	GO:0019362	pyridine nucleotide metabolic process	27/1181	170/17653	2.34082e-05	0.000390869	0.000325724	VCP/PKM/MDH2/GPD2/PCK2/ENO1/OGDH/DLD/GAPDH/ME2/PGK1/HK1/NNT/PDHA1/IDH2/PDHB/ALDOA/LDHA/PDHX/ADPGK/MPC1/NUP155/TKT/AAAS/TPI1/DCXR/KYNU	27
BP	GO:0046496	nicotinamide nucleotide metabolic process	27/1181	170/17653	2.34082e-05	0.000390869	0.000325724	VCP/PKM/MDH2/GPD2/PCK2/ENO1/OGDH/DLD/GAPDH/ME2/PGK1/HK1/NNT/PDHA1/IDH2/PDHB/ALDOA/LDHA/PDHX/ADPGK/MPC1/NUP155/TKT/AAAS/TPI1/DCXR/KYNU	27
BP	GO:0006086	acetyl-CoA biosynthetic process from pyruvate	7/1181	15/17653	2.35332e-05	0.000390869	0.000325724	DLD/DLAT/PDHA1/PDHB/PDPR/PDHX/MPC1	7
BP	GO:0034975	protein folding in endoplasmic reticulum	7/1181	15/17653	2.35332e-05	0.000390869	0.000325724	HSPA5/PDIA3/HSP90B1/CANX/CALR/ERO1A/EMC1	7
BP	GO:0031124	mRNA 3'-end processing	18/1181	90/17653	2.38953e-05	0.000395574	0.000329645	PABPC1/DDX39B/DDX39A/SRSF1/SRSF7/U2AF2/SRSF3/SRSF6/SRSF4/GRSF1/SRSF2/U2AF1/MTPAP/SRRM1/NUDT21/APP/SRSF9/CSTF2	18
BP	GO:0048255	mRNA stabilization	11/1181	38/17653	2.5707e-05	0.000423341	0.000352784	HNRNPU/PABPC1/YBX1/SYNCRIP/HNRNPC/DHX9/HNRNPD/HNRNPA0/ELAVL1/TARDBP/THRAP3	11
BP	GO:0099132	ATP hydrolysis coupled cation transmembrane transport	14/1181	59/17653	2.57414e-05	0.000423341	0.000352784	ATP5F1B/ATP2A2/ATP5F1A/ATP1A1/ATP5F1C/ATP5PO/ATP5PD/ATP2B4/ATP5PB/ATP5F1D/ATP6V0D1/ATP6V0A1/ATP5F1E/ATP5MG	14
BP	GO:1903078	positive regulation of protein localization to plasma membrane	13/1181	52/17653	2.74457e-05	0.000449894	0.000374912	ITGB1/AGR2/EZR/EGFR/EPHA2/ACSL3/RACK1/ITGA3/DLG1/STX4/RHOG/SPTBN1/RER1	13
BP	GO:1901570	fatty acid derivative biosynthetic process	18/1181	91/17653	2.79506e-05	0.000456679	0.000380566	ACSL5/ACSL3/ACAT1/ACSL4/HMGCL/HSD17B12/SLC25A1/BDH1/ANXA1/PPT1/GCDH/TECR/PTGES/PTGES2/HSD17B8/CBR1/MIF/ELOVL1	18
BP	GO:0006890	retrograde vesicle-mediated transport, Golgi to ER	17/1181	83/17653	2.89218e-05	0.000471012	0.00039251	LMAN2/RAB1A/RAB1B/TMED9/TMED10/SCFD1/TMED2/SEC22B/NSF/ERGIC2/SURF4/COPG1/RAB6A/STX18/ARFGAP1/RER1/TAPBP	17
BP	GO:0009260	ribonucleotide biosynthetic process	40/1181	304/17653	3.15848e-05	0.000512716	0.000427263	ATP5F1B/VCP/PKM/ATP5F1A/ENO1/OGDH/SLC25A13/GAPDH/AK2/PGK1/STOML2/HK1/ATP5PF/ATP5F1C/ATP5PO/ACAT1/GNAI3/CYC1/ATP5PD/ALDOA/COX5B/ATP5PB/GNAI2/LDHA/ATP5F1D/COASY/ATP5MF/NIPSNAP2/ADPGK/NUP155/ATP8/ATP5ME/ATP6V0A1/ATP6/CAP1/PARP1/AAAS/TPI1/ATP5F1E/ATP5MG	40
BP	GO:0006487	protein N-linked glycosylation	18/1181	92/17653	3.26074e-05	0.000527608	0.000439673	VCP/RPN2/RPN1/LMAN1/UGGT1/DDOST/STT3A/TMEM165/MCFD2/ST3GAL1/DPM1/ALG2/MOGS/ALG1/DPM3/MAGT1/B4GALT1/SYVN1	18
BP	GO:0009165	nucleotide biosynthetic process	46/1181	369/17653	3.32781e-05	0.00053673	0.000447275	ATP5F1B/VCP/PKM/ATP5F1A/ENO1/OGDH/SLC25A13/GAPDH/AK4/AK2/PGK1/STOML2/HK1/ATP5PF/ATP5F1C/ATP5PO/ACAT1/GNAI3/CYC1/IDH2/ATP5PD/ALDOA/COX5B/ATP5PB/GNAI2/LDHA/ATP5F1D/DUT/COASY/ATP5MF/NIPSNAP2/MTHFD1/ADPGK/NUP155/ATP8/ATP5ME/ATP6V0A1/ATP6/CAP1/PARP1/AAAS/TPI1/ATP5F1E/ATP5MG/HDDC2/KYNU	46
BP	GO:0000726	non-recombinational repair	17/1181	84/17653	3.40305e-05	0.000547106	0.000455921	XRCC5/XRCC6/PRKDC/HIST1H4I/HIST1H4A/HIST1H4D/HIST1H4F/HIST1H4K/HIST1H4J/HIST1H4C/HIST1H4H/HIST1H4B/HIST1H4E/HIST1H4L/HIST2H4A/HIST4H4/HIST2H4B	17
BP	GO:0008631	intrinsic apoptotic signaling pathway in response to oxidative stress	12/1181	46/17653	3.51887e-05	0.000563919	0.000469932	P4HB/SOD2/TRAP1/NONO/SFPQ/PARK7/HSPB1/HTRA2/PML/PARP1/GPX1/ARL6IP5	12
BP	GO:0070584	mitochondrion morphogenesis	8/1181	21/17653	3.63168e-05	0.000580144	0.000483453	OPA1/SLIRP/SSBP1/FIS1/OPA3/POLDIP2/MFF/NDUFS6	8
BP	GO:0010256	endomembrane system organization	51/1181	427/17653	4.0313e-05	0.000641936	0.000534947	MYOF/ATP2A2/LMAN1/ATL3/RTN4/LMAN2/RAB1A/SCARB2/TMED9/RAB2A/CDC42/TOR1AIP2/VAPB/RAB10/TMED10/TARDBP/TMED2/RAB7A/TMED4/LMNA/TICAM2/RTN3/VMP1/YWHAZ/RAB18/ZMPSTE24/TOR1AIP1/EMD/SEC61A1/LNPK/SURF4/GORASP2/CAV1/TRIP11/GCC2/TMEM33/LAMTOR1/SPTBN1/ZFYVE27/NUP155/ARL6IP1/TOR1A/AHNAK2/STX18/ANO6/SYNGR2/PI4K2A/GOLGA2/AAAS/TMED1/HOOK1	51
BP	GO:0046390	ribose phosphate biosynthetic process	40/1181	308/17653	4.26004e-05	0.000676214	0.000563511	ATP5F1B/VCP/PKM/ATP5F1A/ENO1/OGDH/SLC25A13/GAPDH/AK2/PGK1/STOML2/HK1/ATP5PF/ATP5F1C/ATP5PO/ACAT1/GNAI3/CYC1/ATP5PD/ALDOA/COX5B/ATP5PB/GNAI2/LDHA/ATP5F1D/COASY/ATP5MF/NIPSNAP2/ADPGK/NUP155/ATP8/ATP5ME/ATP6V0A1/ATP6/CAP1/PARP1/AAAS/TPI1/ATP5F1E/ATP5MG	40
BP	GO:0002474	antigen processing and presentation of peptide antigen via MHC class I	18/1181	94/17653	4.4036e-05	0.000696798	0.000580665	PDIA3/CANX/CALR/BCAP31/SNAP23/SEC22B/VAMP3/B2M/TAP1/ITGAV/ERAP1/VAMP8/TAP2/LNPEP/CYBA/IFI30/TAPBP/PSME2	18
BP	GO:0016042	lipid catabolic process	41/1181	320/17653	4.69639e-05	0.000738466	0.000615388	HADHA/ETFA/ACADVL/ACAA2/NCEH1/PCK2/HADHB/ETFB/ECHS1/CPT2/ECI1/SCP2/ALDH3A2/HADH/MGLL/ECH1/ACAT1/RAB7A/ACAD9/GBA/CYP4F3/HSD17B4/IVD/ETFDH/CPT1A/CES1/DECR1/PPT1/GCDH/ACAA1/NDUFAB1/HSD17B11/ACADM/LDLR/ACOX1/SGPL1/MECR/ACADS/SMPDL3B/ACOT8/NUDT19	41
BP	GO:0051260	protein homooligomerization	41/1181	320/17653	4.69639e-05	0.000738466	0.000615388	VCP/PKM/SHMT2/ATL3/HSD17B10/LONP1/SOD2/MARCKS/RHOC/LETM1/GLS/ATP5IF1/RACK1/ACAT1/CRYZ/HM13/PEX14/ITPR3/CLPP/GBA/ALDOA/CAT/DUT/CPT1A/DECR1/RBMX/FIS1/SIGMAR1/CAV1/SRC/TOR1A/EHD1/HTRA2/MFF/MIF/TGM2/GOLGA2/DCXR/DERL1/B4GALT1/BID	41
BP	GO:0032469	endoplasmic reticulum calcium ion homeostasis	8/1181	22/17653	5.37314e-05	0.000839616	0.00069968	ATP2A2/BCAP31/TMCO1/FIS1/WFS1/TGM2/PML/APP	8
BP	GO:0032799	low-density lipoprotein receptor particle metabolic process	8/1181	22/17653	5.37314e-05	0.000839616	0.00069968	CLTC/ANXA2/HNRNPK/AP2B1/AP2A1/ITGAV/AP2A2/CNPY2	8
BP	GO:0006903	vesicle targeting	17/1181	87/17653	5.44768e-05	0.00084862	0.000707184	LMAN1/RAB1A/RAB1B/TMED9/SNAP23/TMED10/SCFD1/TMED2/SEC22B/NSF/CD59/MCFD2/SCRIB/GOSR2/CTSZ/AP1M2/GOLGA2	17
BP	GO:0072595	maintenance of protein localization in organelle	11/1181	41/17653	5.60596e-05	0.000868736	0.000723947	HSPA5/PDIA3/HNRNPU/HK1/PARK7/TXN/SKP1/RER1/PML/GPAA1/TSPO	11
BP	GO:0048857	neural nucleus development	14/1181	63/17653	5.62877e-05	0.000868736	0.000723947	HSPA5/ACTB/GLUD1/POTEE/MAOB/RHOA/ATP5PF/CDC42/COX6B1/NDUFS3/ATP5PB/CNP/SCRIB/DYNLL1	14
BP	GO:1901607	alpha-amino acid biosynthetic process	14/1181	63/17653	5.62877e-05	0.000868736	0.000723947	SHMT2/GOT2/GLUD1/ALDH18A1/OAT/GLS/BCAT2/ATP2B4/PLOD3/PLOD2/PARK7/GATM/MTHFD1/PLOD1	14
BP	GO:0019471	4-hydroxyproline metabolic process	6/1181	12/17653	5.76053e-05	0.000882702	0.000735585	P4HB/GOT2/ERO1A/P4HA1/PRDX4/ALDH4A1	6
BP	GO:0019674	NAD metabolic process	15/1181	71/17653	5.77205e-05	0.000882702	0.000735585	VCP/PKM/MDH2/GPD2/PCK2/ENO1/OGDH/GAPDH/PGK1/HK1/ALDOA/LDHA/ADPGK/TPI1/KYNU	15
BP	GO:0090114	COPII-coated vesicle budding	15/1181	71/17653	5.77205e-05	0.000882702	0.000735585	LMAN1/VAPA/RAB1A/RAB1B/VAPB/TMED10/SCFD1/TMED2/SEC22B/NSF/CD59/MCFD2/GOSR2/CTSZ/GOLGA2	15
BP	GO:0045069	regulation of viral genome replication	17/1181	88/17653	6.33733e-05	0.000966202	0.000805169	HSPA8/VAPA/PABPC1/ISG15/DDX5/VAPB/PPIB/ILF3/MAVS/PPIA/TRIM28/HACD3/DDX3X/OAS1/OAS2/BST2/OAS3	17
BP	GO:0051604	protein maturation	47/1181	390/17653	6.40938e-05	0.000974226	0.000811855	HSPD1/CALR/MELTF/ASPH/UQCRC2/UQCRC1/ENO1/ERO1A/PGK1/STOML2/EIF5A/C1QBP/PHB/F3/SERPINH1/PRDX4/HM13/CD55/ECE1/CD59/SPCS2/GLG1/GLRX5/ZMPSTE24/CHCHD4/PMPCA/SPCS3/ADAM10/NDUFAB1/LGMN/CPD/AFG3L2/NCSTN/WFS1/SRC/HTRA2/CTSE/CTSZ/PMPCB/PLAU/SERPINE1/PARP1/TSPAN15/GCSH/APOH/ADAM8/SPCS1	47
BP	GO:0048194	Golgi vesicle budding	16/1181	80/17653	6.67768e-05	0.00101194	0.000843284	LMAN1/VAPA/RAB1A/RAB1B/TMED9/VAPB/TMED10/SCFD1/TMED2/SEC22B/NSF/CD59/MCFD2/GOSR2/CTSZ/GOLGA2	16
BP	GO:0017004	cytochrome complex assembly	10/1181	35/17653	6.78138e-05	0.00101898	0.000849146	HCCS/UQCRB/COX20/CYBA/COX17/COA6/SCO2/UQCR10/COX3/LYRM7	10
BP	GO:0034383	low-density lipoprotein particle clearance	10/1181	35/17653	6.78138e-05	0.00101898	0.000849146	CLTC/ANXA2/HNRNPK/NCEH1/AP2B1/AP2A1/AP2A2/CNPY2/LDLR/EHD1	10
BP	GO:0007229	integrin-mediated signaling pathway	18/1181	97/17653	6.78504e-05	0.00101898	0.000849146	FLNA/ITGA6/ITGB4/CTNNA1/ITGB1/ITGA2/CDC42/ITGA3/ADAM9/TIMP1/CEACAM1/ITGAV/ADAM10/SRC/CD63/CD47/ERBIN/PTK2	18
BP	GO:0042274	ribosomal small subunit biogenesis	15/1181	72/17653	6.84588e-05	0.00102504	0.000854203	NPM1/RPSA/RPS7/RPS6/RPS8/RPS10/RPS16/RPS28/RPS14/RPS19/RPS24/RPS5/RPL38/RPS15/KRR1	15
BP	GO:1900024	regulation of substrate adhesion-dependent cell spreading	12/1181	49/17653	6.92317e-05	0.00103353	0.000861276	FLNA/ACTN4/CALR/MELTF/TACSTD2/C1QBP/CDC42/RAC1/MYADM/CORO1C/S100A10/PTK2	12
BP	GO:0050690	regulation of defense response to virus by virus	9/1181	29/17653	7.67399e-05	0.00113884	0.000949032	AP2B1/RAC1/AP1B1/AP2A1/B2M/SCRIB/AP2A2/AP1G1/AP1M2	9
BP	GO:0051085	chaperone cofactor-dependent protein refolding	9/1181	29/17653	7.67399e-05	0.00113884	0.000949032	HSPA5/HSPA9/HSPA8/HYOU1/ERO1A/HSPA1A/HSPA1B/HSPE1/TOR1A	9
BP	GO:0043112	receptor metabolic process	26/1181	172/17653	7.76225e-05	0.00114854	0.000957116	CLTC/ANXA2/ITGB1/HNRNPK/PTPN1/TFRC/EZR/AP2B1/VAMP3/NSF/AP2A1/ECE1/RAB11B/CEACAM1/SCRIB/ITGAV/AP2A2/PICALM/LGMN/CAV1/SDCBP/LAMTOR1/CNPY2/CD63/LRPAP1/GRK3	26
BP	GO:0032386	regulation of intracellular transport	47/1181	395/17653	8.74784e-05	0.00129056	0.00107547	ANXA2/ATP2A2/JUP/NUCB1/PTPN1/MSN/EZR/BCAP31/DHX9/SCP2/ATP5IF1/CDC42/SCFD1/KHDRBS1/MAVS/RAB21/HSP90AB1/TM9SF4/RAC2/LAMP1/RAB11B/NUMA1/PARK7/TMEM173/EMD/IPO5/FIS1/ERLEC1/GCC2/SRC/VAMP8/HAX1/REEP6/ARHGAP1/EHD1/HTRA2/TXN/MYO1C/STX18/MFF/DERL2/YIPF5/AAAS/RBM4/CYB5R1/TOMM7/STXBP2	47
BP	GO:0010510	regulation of acetyl-CoA biosynthetic process from pyruvate	6/1181	13/17653	0.000100921	0.00148018	0.00123348	DLD/DLAT/PDHA1/PDHB/PDPR/PDHX	6
BP	GO:0036109	alpha-linolenic acid metabolic process	6/1181	13/17653	0.000100921	0.00148018	0.00123348	SCP2/HSD17B4/ACAA1/ACOX1/ELOVL1/ACOT8	6
BP	GO:0032507	maintenance of protein location in cell	15/1181	75/17653	0.00011184	0.00163554	0.00136295	FLNB/HSPA5/PDIA3/JUP/HNRNPU/EZR/HK1/PARK7/CAV1/TXN/SKP1/RER1/PML/GPAA1/TSPO	15
BP	GO:0043281	regulation of cysteine-type endopeptidase activity involved in apoptotic process	30/1181	216/17653	0.000112424	0.00163929	0.00136608	HSPD1/VCP/AIFM1/POR/PRDX3/RHOA/BCAP31/CD44/PRDX5/F3/RACK1/HSPE1/CSNK2A1/CYCS/HMGB1/RPS3/FAM162A/PARK7/DDX3X/BCL2L13/FIS1/SRC/LAMTOR5/ARL6IP1/HTRA2/HIP1R/PML/GPX1/BID/ARL6IP5	30
BP	GO:0006984	ER-nucleus signaling pathway	11/1181	44/17653	0.000113057	0.00164375	0.00136979	HSPA5/HSP90B1/CALR/ATP2A2/AGR2/PTPN1/TMCO1/ERLIN2/ERLIN1/WFS1/TMEM33	11
BP	GO:0002576	platelet degranulation	21/1181	128/17653	0.000113836	0.0016503	0.00137525	FLNA/ACTN4/LGALS3BP/FAM3C/PSAP/TAGLN2/TMX3/ALDOA/SCCPDH/ALB/LAMP2/TIMP1/APLP2/CD63/AHSG/VCL/SERPINE1/APOH/CYB5R1/APP/STXBP2	21
BP	GO:0006405	RNA export from nucleus	23/1181	147/17653	0.000115914	0.00167557	0.00139631	HNRNPA2B1/HNRNPA1/NPM1/EIF5A/DHX9/DDX39B/DDX39A/RPSA/SRSF1/KHDRBS1/SRSF7/U2AF2/SRSF3/SRSF6/SSB/SRSF4/SRSF2/U2AF1/SRRM1/NUP155/AAAS/RPS15/SRSF9	23
BP	GO:0006901	vesicle coating	14/1181	68/17653	0.000135593	0.00195442	0.00162868	LMAN1/RAB1A/RAB1B/TMED9/TMED10/SCFD1/TMED2/SEC22B/NSF/CD59/MCFD2/GOSR2/CTSZ/GOLGA2	14
BP	GO:0033120	positive regulation of RNA splicing	9/1181	31/17653	0.000136792	0.00196043	0.00163369	HSPA8/HSPA1A/SRSF1/U2AF2/DAZAP1/RBMX/THRAP3/SF3B4/SNRNP70	9
BP	GO:1902235	regulation of endoplasmic reticulum stress-induced intrinsic apoptotic signaling pathway	9/1181	31/17653	0.000136792	0.00196043	0.00163369	HYOU1/PTPN1/HSPA1A/OPA1/ERP29/PARK7/WFS1/TXNDC12/SYVN1	9
BP	GO:0017038	protein import	28/1181	198/17653	0.00013748	0.00196468	0.00163723	HSPD1/PDIA3/HSPA8/JUP/TOMM40/GRPEL1/PHB2/TIMM50/MAVS/HSP90AA1/TIMM13/PEX14/TOMM20/HSP90AB1/AGK/TIMM44/TOMM22/LAMP2/TMEM173/CHCHD4/RPL23/IPO5/KPNB1/NUP155/TXN/PML/TIMM23/TOMM7	28
BP	GO:0042743	hydrogen peroxide metabolic process	11/1181	45/17653	0.000140679	0.00199899	0.00166583	MAOB/PRDX3/EGFR/PRDX5/RAC1/RAC2/PRDX1/CAT/PARK7/CYBA/GPX1	11
BP	GO:1902373	negative regulation of mRNA catabolic process	11/1181	45/17653	0.000140679	0.00199899	0.00166583	HNRNPU/PABPC1/YBX1/SYNCRIP/HNRNPC/DHX9/HNRNPD/HNRNPA0/ELAVL1/TARDBP/THRAP3	11
BP	GO:0006103	2-oxoglutarate metabolic process	7/1181	19/17653	0.0001453	0.00205303	0.00171085	GOT2/OGDH/DLD/DLST/IDH2/L2HGDH/MRPS36	7
BP	GO:0042762	regulation of sulfur metabolic process	7/1181	19/17653	0.0001453	0.00205303	0.00171085	DLD/DLAT/PDHA1/COMT/PDHB/PDPR/PDHX	7
BP	GO:0006735	NADH regeneration	8/1181	25/17653	0.000151727	0.00212587	0.00177156	PKM/ENO1/GAPDH/PGK1/HK1/ALDOA/ADPGK/TPI1	8
BP	GO:0061621	canonical glycolysis	8/1181	25/17653	0.000151727	0.00212587	0.00177156	PKM/ENO1/GAPDH/PGK1/HK1/ALDOA/ADPGK/TPI1	8
BP	GO:0061718	glucose catabolic process to pyruvate	8/1181	25/17653	0.000151727	0.00212587	0.00177156	PKM/ENO1/GAPDH/PGK1/HK1/ALDOA/ADPGK/TPI1	8
BP	GO:0006094	gluconeogenesis	15/1181	77/17653	0.000152599	0.00213214	0.00177678	MDH2/GOT2/GPD2/PCK2/ENO1/SLC25A13/GAPDH/PGK1/SLC25A12/PC/ALDOA/SLC25A11/SLC25A1/TPI1/SLC25A10	15
BP	GO:0034446	substrate adhesion-dependent cell spreading	16/1181	86/17653	0.000163949	0.00227803	0.00189836	FLNA/ACTN4/CALR/MELTF/TACSTD2/C1QBP/RAB1A/CDC42/VAMP3/RAC1/MYADM/CORO1C/ITGAV/SRC/S100A10/PTK2	16
BP	GO:0046364	monosaccharide biosynthetic process	16/1181	86/17653	0.000163949	0.00227803	0.00189836	MDH2/GOT2/GPD2/PCK2/ENO1/SLC25A13/GAPDH/PGK1/SLC25A12/PC/ALDOA/SLC25A11/SLC25A1/TKT/TPI1/SLC25A10	16
BP	GO:0043650	dicarboxylic acid biosynthetic process	6/1181	14/17653	0.000166621	0.0023024	0.00191867	GOT2/GLUD1/GLS/MTHFD1/MTHFD1L/KYNU	6
BP	GO:0050812	regulation of acyl-CoA biosynthetic process	6/1181	14/17653	0.000166621	0.0023024	0.00191867	DLD/DLAT/PDHA1/PDHB/PDPR/PDHX	6
BP	GO:0042590	antigen processing and presentation of exogenous peptide antigen via MHC class I	15/1181	78/17653	0.000177422	0.00244492	0.00203743	PDIA3/CALR/SNAP23/SEC22B/VAMP3/B2M/TAP1/ITGAV/VAMP8/TAP2/LNPEP/CYBA/IFI30/TAPBP/PSME2	15
BP	GO:0031589	cell-substrate adhesion	39/1181	319/17653	0.000193756	0.00266269	0.00221891	FLNA/ACTN4/ITGA6/ITGB4/CALR/ITGB1/JUP/ITGA2/MELTF/AGR2/RHOA/TACSTD2/CD44/C1QBP/RAB1A/CDC42/CTNNB1/VAMP3/RAC1/RAC2/HSD17B12/ITGA3/IQGAP1/CASK/LGALS1/MYADM/ADAM9/CORO1C/ITGAV/MACF1/SRC/CTTN/CD63/VCL/PLAU/SERPINE1/COL17A1/S100A10/PTK2	39
BP	GO:0045185	maintenance of protein location	18/1181	105/17653	0.000194858	0.00267052	0.00222543	FLNB/FLNA/HSPA5/PDIA3/JUP/HNRNPU/EZR/HK1/PARK7/YWHAB/CAV1/TXN/SKP1/RER1/PML/G3BP2/GPAA1/TSPO	18
BP	GO:0050685	positive regulation of mRNA processing	8/1181	26/17653	0.000206387	0.00280552	0.00233794	HSPA8/HSPA1A/DAZAP1/RBMX/THRAP3/SF3B4/NUDT21/SNRNP70	8
BP	GO:0061615	glycolytic process through fructose-6-phosphate	8/1181	26/17653	0.000206387	0.00280552	0.00233794	PKM/ENO1/GAPDH/PGK1/HK1/ALDOA/ADPGK/TPI1	8
BP	GO:0061620	glycolytic process through glucose-6-phosphate	8/1181	26/17653	0.000206387	0.00280552	0.00233794	PKM/ENO1/GAPDH/PGK1/HK1/ALDOA/ADPGK/TPI1	8
BP	GO:1902176	negative regulation of oxidative stress-induced intrinsic apoptotic signaling pathway	7/1181	20/17653	0.00021068	0.0028517	0.00237641	SOD2/TRAP1/NONO/PARK7/HSPB1/HTRA2/GPX1	7
BP	GO:0051168	nuclear export	28/1181	203/17653	0.000210921	0.0028517	0.00237641	HSPA9/CALR/HNRNPA2B1/HNRNPA1/NPM1/EIF5A/DHX9/DDX39B/DDX39A/RPSA/SRSF1/KHDRBS1/SRSF7/U2AF2/SRSF3/SRSF6/SSB/PARK7/EMD/SRSF4/SRSF2/U2AF1/SRRM1/NUP155/TXN/AAAS/RPS15/SRSF9	28
BP	GO:0042176	regulation of protein catabolic process	42/1181	355/17653	0.000230235	0.00310446	0.00258705	FLNA/ANXA2/VCP/EEF1A1/MSN/HSPA1A/HSPA1B/EZR/EGFR/DDRGK1/BCAP31/UFL1/PHB/ATP5IF1/CDC42/RACK1/CSNK2A1/RAB7A/HSP90AA1/SEC22B/RPS7/HSP90AB1/NSF/GBA/LPCAT1/ADAM9/RPL5/PARK7/TIMP1/RPL11/RPL23/CAV1/ERLEC1/SDCBP/LDLR/DERL2/PML/GPX1/ADAM8/SNRNP70/PTK2/PSME2	42
BP	GO:0006536	glutamate metabolic process	9/1181	33/17653	0.000231775	0.00311599	0.00259666	GOT2/GLUD1/ALDH18A1/OAT/GLS/CPOX/ALDH4A1/DGLUCY/PRODH2	9
BP	GO:0008637	apoptotic mitochondrial changes	20/1181	125/17653	0.000232333	0.00311599	0.00259666	HSPD1/ACAA2/SLC25A5/SOD2/HSPA1A/ATP5IF1/OPA1/TIMM50/LMNA/PPIF/YWHAZ/FAM162A/NDUFS1/YWHAB/FIS1/MFF/HIP1R/GPX1/BID/DYNLL1	20
BP	GO:0019319	hexose biosynthetic process	15/1181	80/17653	0.00023772	0.00317974	0.00264978	MDH2/GOT2/GPD2/PCK2/ENO1/SLC25A13/GAPDH/PGK1/SLC25A12/PC/ALDOA/SLC25A11/SLC25A1/TPI1/SLC25A10	15
BP	GO:0048199	vesicle targeting, to, from or within Golgi	14/1181	72/17653	0.000255963	0.00341465	0.00284554	LMAN1/RAB1A/RAB1B/TMED9/TMED10/SCFD1/TMED2/SEC22B/NSF/CD59/MCFD2/GOSR2/CTSZ/GOLGA2	14
BP	GO:0048207	vesicle targeting, rough ER to cis-Golgi	13/1181	64/17653	0.000268408	0.00355233	0.00296027	LMAN1/RAB1A/RAB1B/TMED10/SCFD1/TMED2/SEC22B/NSF/CD59/MCFD2/GOSR2/CTSZ/GOLGA2	13
BP	GO:0048208	COPII vesicle coating	13/1181	64/17653	0.000268408	0.00355233	0.00296027	LMAN1/RAB1A/RAB1B/TMED10/SCFD1/TMED2/SEC22B/NSF/CD59/MCFD2/GOSR2/CTSZ/GOLGA2	13
BP	GO:0051881	regulation of mitochondrial membrane potential	13/1181	64/17653	0.000268408	0.00355233	0.00296027	VCP/PPA2/PRDX3/STOML2/ATP5IF1/RACK1/NDUFS1/PARK7/SRC/PARP1/TSPO/BID/ARL6IP5	13
BP	GO:1903900	regulation of viral life cycle	21/1181	137/17653	0.000301239	0.00397635	0.00331362	P4HB/HSPA8/VAPA/PABPC1/ISG15/DDX5/VAPB/PPIB/PC/ILF3/MAVS/PPIA/TRIM28/HACD3/LGALS1/DDX3X/OAS1/OAS2/BST2/PML/OAS3	21
BP	GO:0016236	macroautophagy	36/1181	293/17653	0.000304884	0.0040139	0.00334492	VCP/VDAC1/GAPDH/TOMM70/TOMM40/RAB1A/RAB1B/SPTLC2/SPTLC1/SCFD1/CSNK2A1/RAB7A/GNAI3/SEC22B/RALB/TOMM20/GBA/VMP1/UBA52/TOMM22/STX12/LAMP2/CAPNS1/STBD1/ATP6V0D1/SRC/VAMP8/LAMTOR1/LAMTOR5/POLDIP2/HTRA2/ATP6V0A1/LAMTOR3/PGAM5/TOMM7/DYNLL1	36
BP	GO:0006353	DNA-templated transcription, termination	18/1181	109/17653	0.000314808	0.00412884	0.0034407	CAVIN1/DHX9/DDX39B/DDX39A/SRSF1/SRSF7/U2AF2/SRSF3/SNRPD3/SRSF6/SRSF4/SRSF2/U2AF1/SRRM1/SNRPB/NUDT21/SRSF9/CSTF2	18
BP	GO:0031397	negative regulation of protein ubiquitination	13/1181	65/17653	0.000315261	0.00412884	0.0034407	HSPA1A/HSPA1B/UFL1/ISG15/U2AF2/RPS7/RPS3/RPL5/PARK7/RPL11/RPL23/CAV1/TSPO	13
BP	GO:0036473	cell death in response to oxidative stress	16/1181	91/17653	0.000322367	0.00421091	0.0035091	P4HB/SOD2/TRAP1/NONO/SFPQ/CTNNB1/RACK1/PSAP/PARK7/HSPB1/HTRA2/TXN/PML/PARP1/GPX1/ARL6IP5	16
BP	GO:0010952	positive regulation of peptidase activity	26/1181	188/17653	0.000334891	0.00436315	0.00363596	HSPD1/VCP/AIFM1/ASPH/RHOA/DDRGK1/BCAP31/F3/RACK1/HSPE1/CYCS/HMGB1/RPS3/FAM162A/DDX3X/BCL2L13/PICALM/FIS1/CAV1/HTRA2/HIP1R/PML/APP/BID/ARL6IP5/PSME2	26
BP	GO:0043280	positive regulation of cysteine-type endopeptidase activity involved in apoptotic process	20/1181	129/17653	0.000356477	0.00463235	0.00386029	HSPD1/VCP/AIFM1/RHOA/BCAP31/F3/RACK1/HSPE1/CYCS/HMGB1/RPS3/FAM162A/DDX3X/BCL2L13/FIS1/HTRA2/HIP1R/PML/BID/ARL6IP5	20
BP	GO:0006006	glucose metabolic process	26/1181	189/17653	0.000364166	0.00472004	0.00393337	PKM/MDH2/GOT2/GPD2/PCK2/ENO1/SLC25A13/GAPDH/DLAT/PGK1/HK1/SLC25A12/PDHA1/PC/PDHB/ALDOA/PPP1CA/SLC25A11/SLC25A1/CPT1A/OAS1/SRC/ADPGK/TPI1/DCXR/SLC25A10	26
BP	GO:0007030	Golgi organization	21/1181	139/17653	0.000368461	0.0047634	0.0039695	LMAN1/ATL3/LMAN2/RAB1A/TMED9/RAB2A/CDC42/TMED10/TMED2/TMED4/TICAM2/VMP1/YWHAZ/SURF4/GORASP2/TRIP11/GCC2/STX18/PI4K2A/GOLGA2/TMED1	21
BP	GO:0072330	monocarboxylic acid biosynthetic process	36/1181	296/17653	0.000370966	0.00478346	0.00398621	PKM/ACADVL/DHRS9/ENO1/OGDH/GAPDH/PGK1/HK1/SCP2/ACSL3/MGLL/ALDOA/HSD17B12/LDHA/HACD3/HSD17B4/PARK7/ANXA1/CEACAM1/ERLIN2/TECR/NDUFAB1/ERLIN1/PTGES/ACSS1/PTGES2/ADPGK/NUP155/HSD17B8/CBR1/MECR/MIF/AAAS/ELOVL1/ACOT8/TPI1	36
BP	GO:0071426	ribonucleoprotein complex export from nucleus	20/1181	130/17653	0.000395341	0.0050488	0.00420733	HNRNPA2B1/NPM1/EIF5A/DDX39B/DDX39A/RPSA/SRSF1/SRSF7/U2AF2/SRSF3/SRSF6/SSB/SRSF4/SRSF2/U2AF1/SRRM1/NUP155/AAAS/RPS15/SRSF9	20
BP	GO:0032075	positive regulation of nuclease activity	6/1181	16/17653	0.00039557	0.0050488	0.00420733	HSPA5/PTPN1/HSPA1A/VAPB/RPS3/TCEA1	6
BP	GO:0045056	transcytosis	6/1181	16/17653	0.00039557	0.0050488	0.00420733	CLTC/RAB11B/PICALM/SRC/LRPAP1/MAL2	6
BP	GO:2000811	negative regulation of anoikis	6/1181	16/17653	0.00039557	0.0050488	0.00420733	ITGB1/CEACAM5/PTRH2/CAV1/SRC/PTK2	6
BP	GO:1903201	regulation of oxidative stress-induced cell death	14/1181	75/17653	0.000398126	0.00506853	0.00422378	P4HB/SOD2/TRAP1/NONO/SFPQ/CTNNB1/RACK1/PSAP/PARK7/HSPB1/HTRA2/TXN/PARP1/GPX1	14
BP	GO:0001676	long-chain fatty acid metabolic process	17/1181	102/17653	0.000409125	0.00519537	0.00432947	ACSL5/CYP2S1/SCP2/ACSL3/MGLL/ACSL4/ACAD9/CYP4F3/HSD17B4/CPT1A/ACAA1/PTGES/PTGES2/ACOX1/CBR1/ELOVL1/ACOT8	17
BP	GO:0043903	regulation of symbiosis, encompassing mutualism through parasitism	29/1181	222/17653	0.000416495	0.0052756	0.00439634	P4HB/ANXA2/HSPA8/VAPA/PABPC1/GAPDH/DHX9/ISG15/DDX5/VAPB/PPIB/CFL1/PC/TARDBP/ILF3/MAVS/RAB7A/PPIA/TRIM28/HACD3/LGALS1/DDX3X/ITGAV/OAS1/CAV1/OAS2/BST2/PML/OAS3	29
BP	GO:0010810	regulation of cell-substrate adhesion	26/1181	191/17653	0.000429552	0.00542729	0.00452274	FLNA/ACTN4/ITGA6/CALR/JUP/MELTF/AGR2/RHOA/TACSTD2/C1QBP/CDC42/RAC1/RAC2/HSD17B12/ITGA3/IQGAP1/CASK/LGALS1/MYADM/CORO1C/MACF1/SRC/PLAU/SERPINE1/S100A10/PTK2	26
BP	GO:0043277	apoptotic cell clearance	10/1181	43/17653	0.000434021	0.00546997	0.00455831	PDIA6/TXNDC5/RAB14/TMX3/RAC1/RAC2/HMGB1/RHOG/ITGAV/TGM2	10
BP	GO:0019883	antigen processing and presentation of endogenous antigen	5/1181	11/17653	0.000436642	0.00548922	0.00457435	B2M/TAP1/ERAP1/TAP2/TAPBP	5
BP	GO:0071166	ribonucleoprotein complex localization	20/1181	131/17653	0.000437841	0.00549053	0.00457544	HNRNPA2B1/NPM1/EIF5A/DDX39B/DDX39A/RPSA/SRSF1/SRSF7/U2AF2/SRSF3/SRSF6/SSB/SRSF4/SRSF2/U2AF1/SRRM1/NUP155/AAAS/RPS15/SRSF9	20
BP	GO:0006611	protein export from nucleus	25/1181	181/17653	0.000440322	0.00550787	0.00458989	HSPA9/CALR/HNRNPA2B1/NPM1/EIF5A/DDX39B/DDX39A/RPSA/SRSF1/SRSF7/U2AF2/SRSF3/SRSF6/SSB/PARK7/EMD/SRSF4/SRSF2/U2AF1/SRRM1/NUP155/TXN/AAAS/RPS15/SRSF9	25
BP	GO:0070059	intrinsic apoptotic signaling pathway in response to endoplasmic reticulum stress	12/1181	59/17653	0.000451834	0.0056378	0.00469817	AIFM1/HYOU1/ERO1A/PTPN1/HSPA1A/OPA1/ERP29/PARK7/WFS1/TXNDC12/PML/SYVN1	12
BP	GO:0070268	cornification	18/1181	113/17653	0.000494324	0.00615268	0.00512723	KRT9/KRT8/KRT19/KRT1/KRT18/KRT10/KRT2/KRT7/JUP/KRT14/KRT5/KRT17/DSG2/KRT80/CAPNS1/FLG/PPL/EVPL	18
BP	GO:1903321	negative regulation of protein modification by small protein conjugation or removal	14/1181	77/17653	0.000526453	0.00653636	0.00544696	HSPA1A/HSPA1B/UFL1/ISG15/CTNNB1/U2AF2/RPS7/RPS3/RPL5/PARK7/RPL11/RPL23/CAV1/TSPO	14
BP	GO:0018126	protein hydroxylation	7/1181	23/17653	0.000558008	0.00686022	0.00571685	P4HB/ASPH/P4HA2/P4HA1/PLOD3/PLOD2/PLOD1	7
BP	GO:0031579	membrane raft organization	7/1181	23/17653	0.000558008	0.00686022	0.00571685	ANXA2/DLG1/MYADM/PPT1/CAV1/MAL2/S100A10	7
BP	GO:0051560	mitochondrial calcium ion homeostasis	7/1181	23/17653	0.000558008	0.00686022	0.00571685	LETM1/BCAP31/FIS1/AFG3L2/TGM2/IMMT/MCU	7
BP	GO:2000209	regulation of anoikis	7/1181	23/17653	0.000558008	0.00686022	0.00571685	ITGB1/CEACAM5/PTRH2/MYBBP1A/CAV1/SRC/PTK2	7
BP	GO:0010821	regulation of mitochondrion organization	29/1181	226/17653	0.000559872	0.0068663	0.00572192	ACAA2/VDAC1/SLC25A5/INF2/HSPA1A/STOML2/ATP5IF1/VAT1/OPA1/LMNA/PPIF/GBA/RAC2/YWHAZ/FAM162A/PARK7/YWHAB/FIS1/CTTN/HAX1/HTRA2/MFF/HIP1R/GPX1/TSPO/CYB5R1/TOMM7/BID/DYNLL1	29
BP	GO:0048026	positive regulation of mRNA splicing, via spliceosome	6/1181	17/17653	0.000576891	0.00705777	0.00588147	HSPA8/DAZAP1/RBMX/THRAP3/SF3B4/SNRNP70	6
BP	GO:2001056	positive regulation of cysteine-type endopeptidase activity	21/1181	144/17653	0.000596626	0.00728146	0.00606788	HSPD1/VCP/AIFM1/ASPH/RHOA/BCAP31/F3/RACK1/HSPE1/CYCS/HMGB1/RPS3/FAM162A/DDX3X/BCL2L13/FIS1/HTRA2/HIP1R/PML/BID/ARL6IP5	21
BP	GO:0051651	maintenance of location in cell	16/1181	96/17653	0.000598472	0.00728625	0.00607188	FLNB/HSPA5/PDIA3/JUP/HNRNPU/EZR/HK1/ALB/PARK7/CAV1/TXN/SKP1/RER1/PML/GPAA1/TSPO	16
BP	GO:2000116	regulation of cysteine-type endopeptidase activity	31/1181	249/17653	0.000619444	0.00752332	0.00626944	HSPD1/VCP/AIFM1/ASPH/POR/PRDX3/RHOA/BCAP31/CD44/PRDX5/F3/RACK1/HSPE1/CSNK2A1/CYCS/HMGB1/RPS3/FAM162A/PARK7/DDX3X/BCL2L13/FIS1/SRC/LAMTOR5/ARL6IP1/HTRA2/HIP1R/PML/GPX1/BID/ARL6IP5	31
BP	GO:0030258	lipid modification	34/1181	282/17653	0.000623012	0.00754838	0.00629032	HADHA/ETFA/ACADVL/ACAA2/POR/HADHB/ETFB/EGFR/ECHS1/CPT2/ECI1/SCP2/ALDH3A2/HADH/ECH1/ACAT1/AGK/HSD17B4/IVD/ETFDH/CPT1A/IMPAD1/DECR1/GCDH/ACAA1/NDUFAB1/ACADM/SRC/LAMTOR1/ACOX1/MECR/ACADS/PI4K2A/ACOT8	34
BP	GO:0046467	membrane lipid biosynthetic process	21/1181	145/17653	0.000654668	0.0079128	0.006594	VAPA/ALDH3A2/SPTLC2/VAPB/RACK1/SPTLC1/GBA/AGK/SCCPDH/HACD3/DPM1/NDUFAB1/CERS2/PIGT/PIGS/SGPL1/DPM3/CERS6/ELOVL1/PYURF/GPAA1	21
BP	GO:0006694	steroid biosynthetic process	25/1181	186/17653	0.000663463	0.00799983	0.00666653	ATP1A1/ACAA2/CYB5R3/POR/NSDHL/SCP2/HINT2/ACAT1/HSD17B12/HSD17B4/SF1/CES1/ERLIN2/KPNB1/FDXR/ERLIN1/HSD17B11/HSD17B8/DHCR7/ACOT8/FDX1/ACBD3/TSPO/CYB5R1/NR0B1	25
BP	GO:2001235	positive regulation of apoptotic signaling pathway	24/1181	176/17653	0.000683936	0.00822692	0.00685576	PDIA3/CTNNA1/BCAP31/ATP5IF1/SFPQ/RACK1/PPIF/RPS7/PPP1CA/RPS3/YWHAZ/FAM162A/PARK7/RPL26/YWHAB/FIS1/CAV1/HTRA2/MFF/HIP1R/PML/BID/DYNLL1/BCLAF1	24
BP	GO:0010833	telomere maintenance via telomere lengthening	14/1181	79/17653	0.00068834	0.00824037	0.00686698	HNRNPA2B1/HNRNPA1/HNRNPU/XRCC5/HNRNPC/CTNNB1/HSP90AA1/HSP90AB1/SRC/TCP1/CCT3/PARP1/DKC1/GAR1	14
BP	GO:0051289	protein homotetramerization	14/1181	79/17653	0.00068834	0.00824037	0.00686698	PKM/SHMT2/HSD17B10/SOD2/GLS/ATP5IF1/CRYZ/HM13/PEX14/ALDOA/CAT/DECR1/GOLGA2/DCXR	14
BP	GO:0006105	succinate metabolic process	5/1181	12/17653	0.000707383	0.00838826	0.00699022	SDHA/SUCLG1/SUCLG2/SDHB/SUCLA2	5
BP	GO:0006554	lysine catabolic process	5/1181	12/17653	0.000707383	0.00838826	0.00699022	OGDH/DLD/DLST/ALDH7A1/GCDH	5
BP	GO:0034982	mitochondrial protein processing	5/1181	12/17653	0.000707383	0.00838826	0.00699022	UQCRC2/STOML2/PMPCA/AFG3L2/PMPCB	5
BP	GO:0061684	chaperone-mediated autophagy	5/1181	12/17653	0.000707383	0.00838826	0.00699022	HSPA8/EEF1A1/HSP90AA1/LAMP2/SNRNP70	5
BP	GO:0005996	monosaccharide metabolic process	33/1181	273/17653	0.000710508	0.00840545	0.00700454	PKM/MDH2/GOT2/GPD2/CYB5R3/PCK2/ENO1/SLC25A13/GAPDH/DLAT/PGK1/HK1/SLC25A12/PDHA1/PC/SLC2A1/PDHB/ALDOA/PPP1CA/SLC25A11/CYB5A/SLC25A1/CPT1A/ABHD10/UGT1A10/OAS1/SRC/ADPGK/TKT/TPI1/DCXR/SLC25A10/B4GALT1	33
BP	GO:0016482	cytosolic transport	21/1181	146/17653	0.000717534	0.00846859	0.00705716	CLTC/MSN/EZR/RAB14/RAB7A/RAB21/VAMP3/AP2A1/LAMP1/CES1/GCC2/SRC/GOSR2/RAB6A/AP1G1/TMEM87A/TGOLN2/UBE2O/ACTR2/TBC1D10C/HOOK1	21
BP	GO:0051402	neuron apoptotic process	28/1181	219/17653	0.000732014	0.00861921	0.00718267	HSPA5/AIFM1/HYOU1/SOD2/GAPDH/RHOA/SET/NONO/CDC42/CTNNB1/KRAS/DNAJC5/HSP90AB1/FAM162A/PARK7/PPT1/FIS1/LGMN/SIGMAR1/WFS1/PIGT/CTSZ/PARP1/GPX1/APP/NQO1/BID/ADAM8	28
BP	GO:1900408	negative regulation of cellular response to oxidative stress	11/1181	54/17653	0.000762518	0.00893643	0.00744702	SOD2/TRAP1/NONO/CTNNB1/RACK1/PSAP/PARK7/HSPB1/HTRA2/TXN/GPX1	11
BP	GO:1903202	negative regulation of oxidative stress-induced cell death	11/1181	54/17653	0.000762518	0.00893643	0.00744702	SOD2/TRAP1/NONO/CTNNB1/RACK1/PSAP/PARK7/HSPB1/HTRA2/TXN/GPX1	11
BP	GO:0006007	glucose catabolic process	8/1181	31/17653	0.000772492	0.00903221	0.00752684	PKM/ENO1/GAPDH/PGK1/HK1/ALDOA/ADPGK/TPI1	8
BP	GO:0006575	cellular modified amino acid metabolic process	25/1181	188/17653	0.000777177	0.00906586	0.00755489	P4HB/SHMT2/GOT2/ERO1A/ALDH7A1/ETHE1/PCYOX1/P4HA1/ATP5IF1/PRDX4/LPCAT4/ALDH4A1/PLOD3/MTHFD2/GSTK1/EEF1G/PLOD2/PARK7/GATM/MTHFD1/PTGES/PLOD1/SLC25A32/GPX1/MTHFD1L	25
BP	GO:0006766	vitamin metabolic process	20/1181	137/17653	0.000786021	0.00914775	0.00762312	SHMT2/CYB5R3/MCCC2/PC/SLC2A1/CYB5A/MTHFD2/MCCC1/ABCC1/CYP4F11/PRSS1/LGMN/MTHFD1/PNPO/CBR1/SLC25A32/VKORC1/VKORC1L1/MTHFD1L/KYNU	20
BP	GO:0035338	long-chain fatty-acyl-CoA biosynthetic process	6/1181	18/17653	0.000816648	0.0094603	0.00788358	ACSL5/ACSL3/ACSL4/HSD17B12/TECR/ELOVL1	6
BP	GO:0035635	entry of bacterium into host cell	6/1181	18/17653	0.000816648	0.0094603	0.00788358	CTNND1/CTNNB1/UBA52/ITGAV/CAV1/SRC	6
BP	GO:0006643	membrane lipid metabolic process	28/1181	221/17653	0.000844677	0.00974	0.00811667	VAPA/ESYT1/ALDH3A2/ESYT2/SPTLC2/VAPB/RACK1/SPTLC1/PSAP/GBA/AGK/SCCPDH/HACD3/DPM1/PPT1/NDUFAB1/CERS2/ASAH1/PIGT/PIGS/SGPL1/HTRA2/DPM3/SMPDL3B/CERS6/ELOVL1/PYURF/GPAA1	28
BP	GO:0016051	carbohydrate biosynthetic process	28/1181	221/17653	0.000844677	0.00974	0.00811667	CLTC/MDH2/GOT2/GPD2/PCK2/ENO1/SLC25A13/GAPDH/PGK1/SLC25A12/PC/SLC2A1/GALNT3/ALDOA/PPP1CA/AP2A1/GALNT2/UBA52/SLC25A11/SLC25A1/GALNT5/IMPAD1/NDUFAB1/TKT/GALNT7/TPI1/SLC25A10/B4GALT1	28
CC	GO:0005759	mitochondrial matrix	163/1203	453/18698	8.52191e-80	5.14723e-77	3.0051e-77	HSPD1/ATP5F1B/HSPA9/ACO2/HADHA/ALDH2/LRPPRC/MDH2/SHMT2/ETFA/IARS2/GOT2/ATP5F1A/GLUD1/ACADVL/TUFM/ACAA2/HSD17B10/FH/PCK2/HADHB/LONP1/VDAC1/OGDH/SLC25A5/DLD/SOD2/PITRM1/VDAC2/TRAP1/PPA2/ME2/DLST/CS/IDH3A/LRRC59/AK4/PRDX3/MCCC2/OXCT1/OAT/ETFB/DLAT/TST/ACOT9/ALDH7A1/GLS/ECHS1/HIBADH/ATAD3A/ETHE1/GRPEL1/PRDX5/ECI1/C1QBP/ACSF2/HADH/ATP5F1C/IDH3B/ME3/ALDH1B1/BCAT2/HSPE1/PDHA1/ACAT1/PC/GFM1/IDH2/NDUFS3/S…	163
CC	GO:0030055	cell-substrate junction	137/1203	401/18698	1.41952e-63	4.28696e-61	2.50284e-61	AHNAK/PLEC/FLNB/FLNA/HSPA5/PDIA3/CLTC/ACTB/HSP90B1/ACTN4/HSPA9/ITGA6/P4HB/ITGB4/CTNNA1/CALR/HSPA8/ITGB1/JUP/ITGA2/HNRNPK/NPM1/HYOU1/EPPK1/VIM/ACTC1/PABPC1/MSN/MARCKS/HSPA1A/HSPA1B/GNB2/RHOA/EZR/EGFR/EPHA2/BSG/CD44/RPL3/SCARB2/RPL6/RPL4/CDC42/SNAP23/PPIB/CTNNB1/RAB10/RPLP2/CFL1/RPS3A/RPL7A/RPL12/KRAS/RAB21/RPL30/RPS7/RAC1/LAP3/RPL18/RAC2/RPS2/RPL7/PPIA/ITGA3/RPS4X/CD59/ADGRE5/RPS3/ALCAM/B2M/YWHAZ/…	137
CC	GO:0044391	ribosomal subunit	95/1203	193/18698	3.22528e-61	6.03971e-59	3.52614e-59	RPL3/RPSA/RPL6/RPL4/RPL15/RACK1/RPLP2/RPS3A/RPL7A/RPL12/RPL30/RPS7/MRPL12/RPL18/RPS2/RPL7/RPS4X/RPS3/UBA52/RPL14/RPL8/RPL19/RPL27/RPL28/MRPS31/RPS6/RPS8/RPLP0/RPL21/RPL22/RPL18A/RPS10/RPL32/RPL10/RPL5/RPS26/MRPL28/RPL9/RPS12/RPL11/DDX3X/RPS16/RPL13/RPS20/RPL23/RPL31/RPS28/RPL26/RPS14/RPS19/MRPL50/RPL27A/RPS24/MRPL37/RPL34/RBM3/MRPS27/RPL37A/MRPL52/MRPS22/MRPL2/RPS18/RPL13A/RPS25/MRPL41/RPL29/RPL1…	95
CC	GO:0005925	focal adhesion	133/1203	393/18698	3.99981e-61	6.03971e-59	3.52614e-59	AHNAK/PLEC/FLNB/FLNA/HSPA5/PDIA3/CLTC/ACTB/HSP90B1/ACTN4/HSPA9/ITGA6/P4HB/CTNNA1/CALR/HSPA8/ITGB1/JUP/ITGA2/HNRNPK/NPM1/HYOU1/VIM/ACTC1/PABPC1/MSN/MARCKS/HSPA1A/HSPA1B/GNB2/RHOA/EZR/EGFR/EPHA2/BSG/CD44/RPL3/SCARB2/RPL6/RPL4/CDC42/SNAP23/PPIB/CTNNB1/RAB10/RPLP2/CFL1/RPS3A/RPL7A/RPL12/KRAS/RAB21/RPL30/RPS7/RAC1/LAP3/RPL18/RAC2/RPS2/RPL7/PPIA/ITGA3/RPS4X/CD59/ADGRE5/RPS3/ALCAM/B2M/YWHAZ/HACD3/RPL8/R…	133
CC	GO:0005924	cell-substrate adherens junction	133/1203	396/18698	1.1459e-60	1.38424e-58	8.08158e-59	AHNAK/PLEC/FLNB/FLNA/HSPA5/PDIA3/CLTC/ACTB/HSP90B1/ACTN4/HSPA9/ITGA6/P4HB/CTNNA1/CALR/HSPA8/ITGB1/JUP/ITGA2/HNRNPK/NPM1/HYOU1/VIM/ACTC1/PABPC1/MSN/MARCKS/HSPA1A/HSPA1B/GNB2/RHOA/EZR/EGFR/EPHA2/BSG/CD44/RPL3/SCARB2/RPL6/RPL4/CDC42/SNAP23/PPIB/CTNNB1/RAB10/RPLP2/CFL1/RPS3A/RPL7A/RPL12/KRAS/RAB21/RPL30/RPS7/RAC1/LAP3/RPL18/RAC2/RPS2/RPL7/PPIA/ITGA3/RPS4X/CD59/ADGRE5/RPS3/ALCAM/B2M/YWHAZ/HACD3/RPL8/R…	133
CC	GO:0005840	ribosome	104/1203	242/18698	1.2849e-59	1.29346e-57	7.55159e-58	CANX/EEF2/RRBP1/RPL3/DHX9/RPSA/RPL6/RPL4/RPL15/RACK1/RPLP2/RPS3A/RPL7A/RPL12/RPL30/RPS7/MRPL12/RPL18/RPS2/RPL7/RPS4X/RPS3/UBA52/RPL14/RPL8/RPL19/RPL27/RPL28/SF1/MRPS31/RPS6/RPS8/RPLP0/RPL21/RPL22/RPL18A/RPS10/RPL32/RPL10/RPL5/RPS26/MRPL28/RPL9/RPS12/RPL11/DDX3X/RPS16/RPL13/RPS20/RPL23/RPL31/RPS28/RPL26/RPS14/RPS19/MRPL50/RPL27A/RPS24/MRPL37/RPL34/RBM3/MRPS27/PTCD3/RPL37A/MRPL52/MRPS22/MRPL2/RPS18…	104
CC	GO:0098798	mitochondrial protein complex	104/1203	263/18698	2.44489e-55	2.10959e-53	1.23164e-53	ATP5F1B/HADHA/SDHA/ATP5F1A/UQCRC2/HSD17B10/UQCRC1/VDAC1/SLC25A6/TOMM70/MCCC2/DLAT/TOMM40/UQCRFS1/GRPEL1/ATP5IF1/ATP5PF/ATP5F1C/ATP5PO/TIMM50/COX2/TIMM13/COX5A/CYC1/NDUFS3/PPIF/ATP5PD/TOMM20/MRPL12/SUCLG2/SDHB/COX5B/AGK/ATP5PB/COX4I1/NDUFA8/MCCC1/TOMM22/MRPS31/ATP5F1D/BCKDHA/ETFDH/UQCRH/DNAJC11/NDUFS1/APOO/PARK7/NDUFV2/MRPL28/C15orf48/NDUFV1/ATP5MF/MRPL50/COX6A1/NDUFA10/NDUFS2/NDUFAB1/UQCRB/MRPL37…	104
CC	GO:0022626	cytosolic ribosome	73/1203	123/18698	5.25491e-55	3.96746e-53	2.31631e-53	RPL3/RPSA/RPL6/RPL4/RPL15/RACK1/RPLP2/RPS3A/RPL7A/RPL12/RPL30/RPS7/RPL18/RPS2/RPL7/RPS4X/RPS3/UBA52/RPL14/RPL8/RPL19/RPL27/RPL28/RPS6/RPS8/RPLP0/RPL21/RPL22/RPL18A/RPS10/RPL32/RPL10/RPL5/RPS26/RPL9/RPS12/RPL11/DDX3X/RPS16/RPL13/RPS20/RPL23/RPL31/RPS28/RPL26/RPS14/RPS19/RPL27A/RPS24/RPL34/RPL37A/RPS18/RPL13A/RPS25/RPL29/RPL17/RPL35/RPL36A/RPL10A/RPL23A/RPL35A/RPS5/MRPL4/RPLP1/RPL38/RPS13/RPL39/RPL…	73
CC	GO:0044455	mitochondrial membrane part	86/1203	220/18698	2.32554e-45	1.5607e-43	9.11176e-44	ATP5F1B/SDHA/ATP5F1A/UQCRC2/UQCRC1/SLC25A6/TOMM70/TOMM40/UQCRFS1/GRPEL1/ATP5IF1/ATP5PF/NNT/OPA1/ATP5F1C/ATP5PO/TIMM50/COX2/COX5A/CYC1/NDUFS3/PPIF/ATP5PD/TOMM20/SDHB/COX5B/AGK/ATP5PB/COX4I1/NDUFA8/TOMM22/ARMCX3/ATP5F1D/ETFDH/UQCRH/CPT1A/DNAJC11/NDUFS1/APOO/PARK7/NDUFV2/BDH1/C15orf48/NDUFV1/COX7A2/ATP5MF/COX6A1/NDUFA10/NDUFS2/NDUFAB1/UQCRB/FIS1/AFG3L2/NDUFB11/SYNJ2BP/COX7A2L/NDUFB10/PPOX/MPC1/L2HGD…	86
CC	GO:0022625	cytosolic large ribosomal subunit	46/1203	68/18698	6.91531e-39	4.17685e-37	2.43856e-37	RPL3/RPL6/RPL4/RPL15/RPLP2/RPL7A/RPL12/RPL30/RPL18/RPL7/UBA52/RPL14/RPL8/RPL19/RPL27/RPL28/RPLP0/RPL21/RPL22/RPL18A/RPL32/RPL10/RPL5/RPL9/RPL11/RPL13/RPL23/RPL31/RPL26/RPL27A/RPL34/RPL37A/RPL13A/RPL29/RPL17/RPL35/RPL36A/RPL10A/RPL23A/RPL35A/RPLP1/RPL38/RPL39/RPL24/RPL36/RSL1D1	46
CC	GO:0098800	inner mitochondrial membrane protein complex	64/1203	141/18698	9.60096e-39	5.2718e-37	3.07782e-37	ATP5F1B/SDHA/ATP5F1A/UQCRC2/UQCRC1/SLC25A6/UQCRFS1/GRPEL1/ATP5IF1/ATP5PF/ATP5F1C/ATP5PO/TIMM50/COX2/COX5A/CYC1/NDUFS3/PPIF/ATP5PD/SDHB/COX5B/AGK/ATP5PB/COX4I1/NDUFA8/ATP5F1D/UQCRH/DNAJC11/NDUFS1/APOO/PARK7/NDUFV2/C15orf48/NDUFV1/ATP5MF/COX6A1/NDUFA10/NDUFS2/NDUFAB1/UQCRB/AFG3L2/NDUFB11/NDUFB10/COX1/ATP8/ATP5ME/PMPCB/ATP6/NDUFS6/NDUFS8/IMMT/ATP5MD/C19orf70/TIMM23/ATP5F1E/UQCR10/ATP5MG/NDUFS5/UQCRQ…	64
CC	GO:0015934	large ribosomal subunit	58/1203	121/18698	7.1945e-37	3.62123e-35	2.11417e-35	RPL3/RPL6/RPL4/RPL15/RPLP2/RPL7A/RPL12/RPL30/MRPL12/RPL18/RPL7/UBA52/RPL14/RPL8/RPL19/RPL27/RPL28/RPLP0/RPL21/RPL22/RPL18A/RPL32/RPL10/RPL5/MRPL28/RPL9/RPL11/RPL13/RPL23/RPL31/RPL26/MRPL50/RPL27A/MRPL37/RPL34/RBM3/RPL37A/MRPL52/MRPL2/RPL13A/MRPL41/RPL29/RPL17/MRPL46/RPL35/RPL36A/RPL10A/RPL23A/RPL35A/MRPL4/RPLP1/RPL38/RPL39/RPL24/RPL36/MRPL19/MRPL10/RSL1D1	58
CC	GO:0043209	myelin sheath	66/1203	164/18698	6.06911e-36	2.8198e-34	1.64628e-34	HSPD1/ATP5F1B/HSPA5/PDIA3/ACTB/HSPA9/CANX/ACO2/ANXA2/VCP/HSPA8/PKM/ITGB1/MDH2/SDHA/GOT2/ATP5F1A/ATP1A1/TUFM/UQCRC2/UQCRC1/VDAC1/EEF1A1/SLC25A5/GNB1/DLD/MSN/VDAC2/DLST/IDH3A/GNB2/PRDX3/DLAT/EZR/PHB/SLC25A3/CDC42/ATP5F1C/SLC25A12/ATP1B1/PDHA1/HSP90AA1/COX5A/NDUFS3/ITPR3/TUBA1B/ATP5PD/NSF/ATP5PB/PRDX1/CNP/TUBB4B/ALB/DLG1/RALA/STX4/NDUFS1/NDUFV2/SCRIB/NDUFA10/SUCLA2/TCP1/TKT/CCT3/MIF/IMMT	66
CC	GO:0044445	cytosolic part	81/1203	255/18698	4.6018e-35	1.98535e-33	1.1591e-33	HSPA8/CYB5R3/ENO1/PRDX3/RPL3/RPSA/RPL6/RPL4/RPL15/RACK1/RPLP2/RPS3A/RPL7A/RPL12/RPL30/RPS7/RPL18/RPS2/RPL7/RPS4X/RPS3/UBA52/RPL14/RPL8/RPL19/RPL27/RPL28/STX12/RPS6/RPS8/RPLP0/RPL21/RPL22/RPL18A/RPS10/RPL32/RPL10/RPL5/RPS26/RPL9/RPS12/RPL11/DDX3X/RPS16/RPL13/RPS20/RPL23/RPL31/RPS28/RPL26/RPS14/RPS19/RPL27A/RPS24/RPL34/RPL37A/RPS18/RPL13A/RPS25/RPL29/RPL17/RPL35/RPL36A/RPL10A/RPL23A/TCP1/RPL35A/CCT…	81
CC	GO:0042470	melanosome	48/1203	106/18698	2.73375e-29	1.03199e-27	6.02503e-28	HSPA5/PDIA3/CLTC/HSP90B1/CANX/GANAB/P4HB/ANXA2/HSPA8/PDIA4/RPN1/ITGB1/ATP1A1/PDIA6/CALU/TFRC/CTSD/SLC3A2/BSG/RAB1A/RAB2A/TPP1/PPIB/RAB5C/TMED10/RAB7A/HSP90AA1/SEC22B/SLC2A1/ERP29/DNAJC5/RAC1/HSP90AB1/SND1/SLC1A5/PRDX1/YWHAZ/CNP/LAMP1/SYPL1/YWHAB/NCSTN/SDCBP/TMEM33/CD63/CAPG/ATP6V0A1/CTSB	48
CC	GO:0048770	pigment granule	48/1203	106/18698	2.73375e-29	1.03199e-27	6.02503e-28	HSPA5/PDIA3/CLTC/HSP90B1/CANX/GANAB/P4HB/ANXA2/HSPA8/PDIA4/RPN1/ITGB1/ATP1A1/PDIA6/CALU/TFRC/CTSD/SLC3A2/BSG/RAB1A/RAB2A/TPP1/PPIB/RAB5C/TMED10/RAB7A/HSP90AA1/SEC22B/SLC2A1/ERP29/DNAJC5/RAC1/HSP90AB1/SND1/SLC1A5/PRDX1/YWHAZ/CNP/LAMP1/SYPL1/YWHAB/NCSTN/SDCBP/TMEM33/CD63/CAPG/ATP6V0A1/CTSB	48
CC	GO:0015935	small ribosomal subunit	37/1203	73/18698	4.42158e-25	1.57096e-23	9.1717e-24	RPSA/RACK1/RPS3A/RPS7/RPS2/RPS4X/RPS3/MRPS31/RPS6/RPS8/RPS10/RPS26/RPS12/DDX3X/RPS16/RPS20/RPS28/RPS14/RPS19/RPS24/MRPS27/MRPS22/RPS18/RPS25/MRPS35/MRPS36/RPS5/RPS13/MRPS17/DAP3/MRPS16/RPS15/MRPS18B/RPS9/RPS11/MRPS26/MRPS15	37
CC	GO:1990204	oxidoreductase complex	45/1203	112/18698	7.47602e-25	2.50862e-23	1.4646e-23	P4HB/SDHA/GPD2/UQCRC2/UQCRC1/OGDH/DLD/DLST/DLAT/UQCRFS1/P4HA1/PDHA1/CYC1/NDUFS3/PDHB/SDHB/NDUFA8/BCKDHA/ETFDH/UQCRH/NDUFS1/PARK7/NDUFV2/NDUFV1/NDUFA10/NDUFS2/NDUFAB1/UQCRB/NDUFB11/PDHX/NDUFB10/BCKDHB/MRPS36/COX1/CYBA/PMPCB/NDUFS6/NDUFS8/DBT/GCSH/UQCR10/NDUFS5/UQCRQ/NDUFA4/NDUFA7	45
CC	GO:0005746	mitochondrial respiratory chain	40/1203	93/18698	1.40714e-23	4.47324e-22	2.6116e-22	SDHA/UQCRC2/UQCRC1/UQCRFS1/NNT/COX2/COX5A/CYC1/NDUFS3/SDHB/COX5B/COX4I1/NDUFA8/UQCRH/NDUFS1/PARK7/NDUFV2/C15orf48/NDUFV1/COX7A2/COX6A1/NDUFA10/NDUFS2/NDUFAB1/UQCRB/NDUFB11/COX7A2L/NDUFB10/COX7B/COX1/PMPCB/NDUFS6/NDUFS8/UQCR10/NDUFS5/UQCRQ/NDUFA4/COX3/NDUFA7/COX7C	40
CC	GO:0070469	respiratory chain	41/1203	100/18698	3.65257e-23	1.10308e-21	6.44006e-22	SDHA/UQCRC2/UQCRC1/UQCRFS1/NNT/COX2/CYCS/COX5A/CYC1/NDUFS3/SDHB/COX5B/COX4I1/NDUFA8/UQCRH/NDUFS1/PARK7/NDUFV2/C15orf48/NDUFV1/COX7A2/COX6A1/NDUFA10/NDUFS2/NDUFAB1/UQCRB/NDUFB11/COX7A2L/NDUFB10/COX7B/COX1/PMPCB/NDUFS6/NDUFS8/UQCR10/NDUFS5/UQCRQ/NDUFA4/COX3/NDUFA7/COX7C	41
CC	GO:0098803	respiratory chain complex	37/1203	85/18698	3.93109e-22	1.13066e-20	6.60108e-21	SDHA/UQCRC2/UQCRC1/UQCRFS1/COX2/COX5A/CYC1/NDUFS3/SDHB/COX5B/COX4I1/NDUFA8/UQCRH/NDUFS1/PARK7/NDUFV2/C15orf48/NDUFV1/COX6A1/NDUFA10/NDUFS2/NDUFAB1/UQCRB/NDUFB11/NDUFB10/COX7B/COX1/PMPCB/NDUFS6/NDUFS8/UQCR10/NDUFS5/UQCRQ/NDUFA4/COX3/NDUFA7/COX7C	37
CC	GO:0000788	nuclear nucleosome	26/1203	40/18698	7.84495e-22	2.15379e-20	1.25744e-20	HIST1H3A/HIST1H3D/HIST1H3C/HIST1H3E/HIST1H3I/HIST1H3G/HIST1H3J/HIST1H3H/HIST1H3B/HIST1H3F/H3F3A/H3F3B/HIST1H4I/HIST1H4A/HIST1H4D/HIST1H4F/HIST1H4K/HIST1H4J/HIST1H4C/HIST1H4H/HIST1H4B/HIST1H4E/HIST1H4L/HIST2H4A/HIST4H4/HIST2H4B	26
CC	GO:0005793	endoplasmic reticulum-Golgi intermediate compartment	43/1203	123/18698	5.2999e-21	1.3918e-19	8.12571e-20	HSPA5/P4HB/CALR/LMAN1/UGGT1/PDIA6/NUCB1/ERP44/LMAN2/BCAP31/RAB1B/TMED9/RAB2A/SERPINH1/TMED10/TMED2/SEC22B/TMED4/TICAM2/CD55/HMGB1/ERGIC3/CD59/VMP1/MCFD2/TAP1/MYDGF/NUCB2/ERGIC2/ERGIC1/SURF4/COPG1/GOSR2/TAP2/LRPAP1/CTSZ/RER1/YIF1A/GOLGA2/TMED1/VMA21/TAPBP/CNIH4	43
CC	GO:0030667	secretory granule membrane	69/1203	303/18698	9.89909e-21	2.49127e-19	1.45447e-19	VAPA/CKAP4/DDOST/RHOA/PGRMC1/CEACAM6/BSG/CD44/HMOX2/SNAP23/RAB10/RAP1B/RAB5C/PSAP/TMED10/RAB14/TMED2/RAB7A/TMX3/ITPR3/TICAM2/CD55/DNAJC5/RAC1/LPCAT1/CD59/ADGRE5/LAMP1/IQGAP1/ARL8A/LAMP2/RAB18/LGALS3/TMEM173/CEACAM1/RHOG/ITGAV/AP2A2/MLEC/ADAM10/APLP2/SURF4/RAB8A/CAV1/TRIP11/STBD1/NCSTN/VAMP8/LAMTOR1/RAB6A/CD63/CD47/CYSTM1/CYBA/ANO6/ATP6V0A1/BST2/RAP2B/PLAU/LAMTOR3/TMBIM1/MAGT1/CYB5R1/B4GALT1/ADAM8…	69
CC	GO:0031968	organelle outer membrane	53/1203	201/18698	3.27695e-19	7.91712e-18	4.62223e-18	LRPPRC/CYB5R3/HADHB/VDAC1/ACSL5/VDAC2/MAOA/TOMM70/MAOB/TOMM40/CYB5B/HK1/ACSL3/VAT1/OPA1/PHB2/MAVS/VDAC3/ACSL4/ITPR3/TOMM20/AGK/UBA52/CYB5A/CNP/CISD1/TOMM22/RETSAT/ARMCX3/CPT1A/DNAJC11/COASY/TMEM173/EMD/DDX3X/AKAP1/FIS1/SIGMAR1/SYNJ2BP/NIPSNAP2/MTX1/HAX1/BCL2L2/SLC25A46/MFF/DHCR7/TMEM109/PGAM5/TSPO/TOMM7/BID/CISD2/TOMM34	53
CC	GO:0019867	outer membrane	53/1203	203/18698	5.30377e-19	1.23211e-17	7.19338e-18	LRPPRC/CYB5R3/HADHB/VDAC1/ACSL5/VDAC2/MAOA/TOMM70/MAOB/TOMM40/CYB5B/HK1/ACSL3/VAT1/OPA1/PHB2/MAVS/VDAC3/ACSL4/ITPR3/TOMM20/AGK/UBA52/CYB5A/CNP/CISD1/TOMM22/RETSAT/ARMCX3/CPT1A/DNAJC11/COASY/TMEM173/EMD/DDX3X/AKAP1/FIS1/SIGMAR1/SYNJ2BP/NIPSNAP2/MTX1/HAX1/BCL2L2/SLC25A46/MFF/DHCR7/TMEM109/PGAM5/TSPO/TOMM7/BID/CISD2/TOMM34	53
CC	GO:0022627	cytosolic small ribosomal subunit	26/1203	48/18698	5.6116e-19	1.25534e-17	7.32899e-18	RPSA/RACK1/RPS3A/RPS7/RPS2/RPS4X/RPS3/RPS6/RPS8/RPS10/RPS26/RPS12/DDX3X/RPS16/RPS20/RPS28/RPS14/RPS19/RPS24/RPS18/RPS25/RPS5/RPS13/RPS15/RPS9/RPS11	26
CC	GO:0042788	polysomal ribosome	21/1203	30/18698	6.58562e-19	1.42061e-17	8.29392e-18	EEF2/DHX9/RPL6/RPL7A/RPL30/RPL18/RPL8/RPL19/RPL18A/RPL32/RPS26/RPL11/RPL31/RPS28/RPL36A/RPL10A/RPL38/RPL39/RPL24/RPL36/NR0B1	21
CC	GO:0000786	nucleosome	36/1203	105/18698	1.73335e-17	3.61015e-16	2.10771e-16	HIST1H3A/HIST1H3D/HIST1H3C/HIST1H3E/HIST1H3I/HIST1H3G/HIST1H3J/HIST1H3H/HIST1H3B/HIST1H3F/HIST2H2BF/HIST1H2AE/HIST1H2AB/H3F3A/H3F3B/HIST1H4I/HIST1H4A/HIST1H4D/HIST1H4F/HIST1H4K/HIST1H4J/HIST1H4C/HIST1H4H/HIST1H4B/HIST1H4E/HIST1H4L/HIST2H4A/HIST4H4/HIST2H4B/HIST2H3C/HIST2H3A/HIST2H3D/HIST1H1B/HIST1H1D/H1F0/HP1BP3	36
CC	GO:0005741	mitochondrial outer membrane	46/1203	178/18698	1.76128e-16	3.54605e-15	2.07028e-15	CYB5R3/HADHB/VDAC1/ACSL5/VDAC2/MAOA/TOMM70/MAOB/TOMM40/CYB5B/HK1/ACSL3/VAT1/OPA1/PHB2/MAVS/VDAC3/ACSL4/TOMM20/AGK/UBA52/CYB5A/CNP/CISD1/TOMM22/ARMCX3/CPT1A/DNAJC11/COASY/TMEM173/DDX3X/AKAP1/FIS1/SYNJ2BP/NIPSNAP2/MTX1/HAX1/BCL2L2/SLC25A46/MFF/PGAM5/TSPO/TOMM7/BID/CISD2/TOMM34	46
CC	GO:0044815	DNA packaging complex	36/1203	112/18698	1.85111e-16	3.60669e-15	2.10568e-15	HIST1H3A/HIST1H3D/HIST1H3C/HIST1H3E/HIST1H3I/HIST1H3G/HIST1H3J/HIST1H3H/HIST1H3B/HIST1H3F/HIST2H2BF/HIST1H2AE/HIST1H2AB/H3F3A/H3F3B/HIST1H4I/HIST1H4A/HIST1H4D/HIST1H4F/HIST1H4K/HIST1H4J/HIST1H4C/HIST1H4H/HIST1H4B/HIST1H4E/HIST1H4L/HIST2H4A/HIST4H4/HIST2H4B/HIST2H3C/HIST2H3A/HIST2H3D/HIST1H1B/HIST1H1D/H1F0/HP1BP3	36
CC	GO:0070069	cytochrome complex	20/1203	33/18698	3.25154e-16	6.13728e-15	3.58311e-15	UQCRC2/UQCRC1/UQCRFS1/COX2/COX5A/CYC1/COX5B/COX4I1/UQCRH/C15orf48/COX6A1/UQCRB/COX7B/COX1/PMPCB/UQCR10/UQCRQ/NDUFA4/COX3/COX7C	20
CC	GO:0005753	mitochondrial proton-transporting ATP synthase complex	17/1203	23/18698	3.4743e-16	6.35903e-15	3.71257e-15	ATP5F1B/ATP5F1A/ATP5IF1/ATP5PF/ATP5F1C/ATP5PO/PPIF/ATP5PD/ATP5PB/ATP5F1D/ATP5MF/ATP8/ATP5ME/ATP6/ATP5MD/ATP5F1E/ATP5MG	17
CC	GO:0101002	ficolin-1-rich granule	46/1203	185/18698	8.72679e-16	1.55029e-14	9.051e-15	KRT1/VCP/HSPA8/PKM/JUP/EEF1A1/EEF2/HSPA1A/HSPA1B/ILF2/RHOA/CTSD/XRCC6/PRDX4/HSP90AA1/CD55/RAC1/HSP90AB1/ALDOA/HMGB1/PPIA/LAMP1/CAT/ARL8A/LAMP2/LGALS3/DDX3X/MVP/AP2A2/KPNB1/ASAH1/STBD1/LAMTOR1/SRP14/VCL/ATP6V0A1/CTSZ/MIF/CAND1/GNS/CTSB/ADAM8/ACTR2/DYNLL1/TBC1D10C/UBR4	46
CC	GO:0045259	proton-transporting ATP synthase complex	17/1203	24/18698	1.11983e-15	1.93251e-14	1.12825e-14	ATP5F1B/ATP5F1A/ATP5IF1/ATP5PF/ATP5F1C/ATP5PO/PPIF/ATP5PD/ATP5PB/ATP5F1D/ATP5MF/ATP8/ATP5ME/ATP6/ATP5MD/ATP5F1E/ATP5MG	17
CC	GO:0031227	intrinsic component of endoplasmic reticulum membrane	41/1203	152/18698	1.54272e-15	2.58835e-14	1.51115e-14	HSPA5/CANX/CALR/RTN4/ESYT1/DHRS9/RRBP1/BCAP31/ESYT2/HM13/HACD3/SEC63/TAP1/STIM1/EMC1/HLA-DRB1/ZMPSTE24/TMCO1/SEC61A1/TECR/LNPK/SEC62/WFS1/FKBP8/PIGT/PIGS/TMEM33/TAP2/ZFYVE27/ARL6IP1/SGPL1/TBL2/DPM3/DERL2/DHCR7/ELOVL1/GPAA1/DERL1/TAPBP/SPCS1/SYVN1	41
CC	GO:0032993	protein-DNA complex	47/1203	198/18698	2.91176e-15	4.75325e-14	2.77507e-14	JUP/NPM1/XRCC5/XRCC6/HIST1H3A/HIST1H3D/HIST1H3C/HIST1H3E/HIST1H3I/HIST1H3G/HIST1H3J/HIST1H3H/HIST1H3B/HIST1H3F/CTNNB1/HIST2H2BF/HIST1H2AE/HIST1H2AB/H3F3A/H3F3B/PRKDC/HIST1H4I/HIST1H4A/HIST1H4D/HIST1H4F/HIST1H4K/HIST1H4J/HIST1H4C/HIST1H4H/HIST1H4B/HIST1H4E/HIST1H4L/HIST2H4A/HIST4H4/HIST2H4B/HIST2H3C/HIST2H3A/HIST2H3D/HIST1H1B/HIST1H1D/PURA/TOP1/H1F0/RPA2/PURB/PARP1/HP1BP3	47
CC	GO:0030176	integral component of endoplasmic reticulum membrane	40/1203	148/18698	3.17628e-15	5.04861e-14	2.94752e-14	HSPA5/CANX/CALR/RTN4/ESYT1/DHRS9/RRBP1/BCAP31/HM13/HACD3/SEC63/TAP1/STIM1/EMC1/HLA-DRB1/ZMPSTE24/TMCO1/SEC61A1/TECR/LNPK/SEC62/WFS1/FKBP8/PIGT/PIGS/TMEM33/TAP2/ZFYVE27/ARL6IP1/SGPL1/TBL2/DPM3/DERL2/DHCR7/ELOVL1/GPAA1/DERL1/TAPBP/SPCS1/SYVN1	40
CC	GO:0005844	polysome	28/1203	74/18698	3.56276e-15	5.51771e-14	3.22139e-14	CALR/VIM/EEF2/DHX9/RPL6/FUS/RPL7A/RPL30/RPL18/RPS4X/RPS3/RPL8/RPL19/RPS6/RPL18A/RPL32/RPS26/RPL11/RPL31/RPS28/EIF4B/RPL36A/RPL10A/RPL38/RPL39/RPL24/RPL36/NR0B1	28
CC	GO:0009295	nucleoid	21/1203	43/18698	2.15654e-14	3.17695e-13	1.85479e-13	ATP5F1B/HSPA9/HADHA/LRPPRC/SHMT2/ACADVL/TUFM/HADHB/LONP1/VDAC1/SLC25A5/VDAC2/LRRC59/ATAD3A/SSBP1/GRSF1/ELAC2/FASTKD5/POLDIP2/DBT/TRMT10C	21
CC	GO:0042645	mitochondrial nucleoid	21/1203	43/18698	2.15654e-14	3.17695e-13	1.85479e-13	ATP5F1B/HSPA9/HADHA/LRPPRC/SHMT2/ACADVL/TUFM/HADHB/LONP1/VDAC1/SLC25A5/VDAC2/LRRC59/ATAD3A/SSBP1/GRSF1/ELAC2/FASTKD5/POLDIP2/DBT/TRMT10C	21
CC	GO:0033116	endoplasmic reticulum-Golgi intermediate compartment membrane	26/1203	68/18698	2.56792e-14	3.69291e-13	2.15602e-13	CALR/LMAN1/LMAN2/BCAP31/RAB1B/TMED9/RAB2A/TMED10/TMED2/SEC22B/CD55/ERGIC3/CD59/VMP1/MCFD2/TAP1/ERGIC2/ERGIC1/SURF4/GOSR2/TAP2/CTSZ/GOLGA2/TMED1/VMA21/TAPBP	26
CC	GO:0005766	primary lysosome	39/1203	155/18698	9.01142e-14	1.23702e-12	7.22207e-13	ANXA2/VCP/CYB5R3/VAPA/CKAP4/DDOST/CEACAM6/HRNR/FAF2/VAT1/SNAP23/RAP1B/TXNDC5/RAB5C/PSAP/STX7/DNAJC5/LPCAT1/TUBB4B/LAMP1/ARL8A/LAMP2/S100A7/DNAJC3/SURF4/NCSTN/SDCBP/VAMP8/LAMTOR1/PTGES2/CD63/GRN/BST2/CAP1/GNS/MAGT1/B4GALT1/ACTR2/STXBP2	39
CC	GO:0042582	azurophil granule	39/1203	155/18698	9.01142e-14	1.23702e-12	7.22207e-13	ANXA2/VCP/CYB5R3/VAPA/CKAP4/DDOST/CEACAM6/HRNR/FAF2/VAT1/SNAP23/RAP1B/TXNDC5/RAB5C/PSAP/STX7/DNAJC5/LPCAT1/TUBB4B/LAMP1/ARL8A/LAMP2/S100A7/DNAJC3/SURF4/NCSTN/SDCBP/VAMP8/LAMTOR1/PTGES2/CD63/GRN/BST2/CAP1/GNS/MAGT1/B4GALT1/ACTR2/STXBP2	39
CC	GO:0005791	rough endoplasmic reticulum	29/1203	90/18698	1.46946e-13	1.97235e-12	1.15151e-12	CANX/RPN2/RPN1/MELTF/CKAP4/NUCB1/BCAP31/RPL6/RPL4/RAB14/HM13/RPL18/PLOD3/RPL27/SSR4/PLOD2/RPS26/SEC61A1/RPS28/DNAJC3/SRPRB/SEC62/PLOD1/ARL6IP1/LRPAP1/DERL2/TRAM1/DERL1/APP	29
CC	GO:0031970	organelle envelope lumen	28/1203	86/18698	2.88288e-13	3.78535e-12	2.20999e-12	AIFM1/SHMT2/TRAP1/AK2/STOML2/OPA1/CPOX/COX6B1/CYCS/TIMM13/AGK/NDUFA8/CHCHD2/CAT/NDUFS1/PARK7/TIMM8A/CHCHD4/GATM/PTGES/HAX1/PPOX/HTRA2/COX17/COA6/TIMM23/APP/NDUFS5	28
CC	GO:0031983	vesicle lumen	60/1203	339/18698	6.39169e-13	8.214e-12	4.79556e-12	HSP90B1/ACTN4/ANXA2/CALR/VCP/HSPA8/PKM/JUP/CYB5R3/HYOU1/EEF1A1/EEF2/ERP44/LGALS3BP/ILF2/XRCC5/CTSD/EGFR/FAM3C/HRNR/XRCC6/FAF2/VAT1/PRDX4/TXNDC5/LCN2/HSP90AA1/HSP90AB1/S100A11/ALDOA/HMGB1/SCCPDH/PPIA/B2M/TUBB4B/ALB/CAT/TIMP1/DDX3X/MVP/S100A7/KPNB1/ACAA1/DNAJC3/SDCBP/SPTAN1/PTGES2/GRN/AHSG/SRP14/VCL/CTSZ/MIF/SERPINE1/CAP1/CAND1/GNS/APOH/APP/ACTR2	60
CC	GO:0005758	mitochondrial intermembrane space	26/1203	78/18698	1.0935e-12	1.37599e-11	8.03341e-12	AIFM1/SHMT2/TRAP1/AK2/STOML2/OPA1/CPOX/COX6B1/CYCS/TIMM13/AGK/NDUFA8/CHCHD2/CAT/NDUFS1/PARK7/TIMM8A/CHCHD4/GATM/HAX1/PPOX/HTRA2/COX17/COA6/TIMM23/NDUFS5	26
CC	GO:0005681	spliceosomal complex	42/1203	190/18698	1.14208e-12	1.40779e-11	8.21904e-12	HSPA8/HNRNPA2B1/HNRNPA1/HNRNPK/HNRNPU/PABPC1/YBX1/HNRNPA3/SYNCRIP/HNRNPC/HNRNPM/HNRNPF/DDX39B/DDX39A/HNRNPH1/HNRNPR/DDX5/SRSF1/U2AF2/HNRNPH3/SNRPD3/SF1/SNRPD1/SNRPD2/LGALS3/SF3B1/RBMX/SRSF2/U2AF1/U2AF1L5/RBM25/SRRM1/RALY/SF3B4/MTREX/SNRPB/DHX15/SNRPC/SNRNP200/EFCAB5/RBM17/SNRNP70	42
[truncated: 259 more rows]

## Sheet: MCF7.GO.All
ONTOLOGY	ID	Description	GeneRatio	BgRatio	pvalue	p.adjust	qvalue	geneID	Count
[truncated: 907 more rows]

## Sheet: MDA.GO.All
ONTOLOGY	ID	Description	GeneRatio	BgRatio	pvalue	p.adjust	qvalue	geneID	Count
[truncated: 971 more rows]

[truncated: 1 more sheets: Hela.GO.All]
